# Supplementary material
Source: PubMed Central journal article supplement (PMC3163732)
Supplement: NIHMS297720-supplement-01.pdf [file NIHMS297720-supplement-01.pdf]

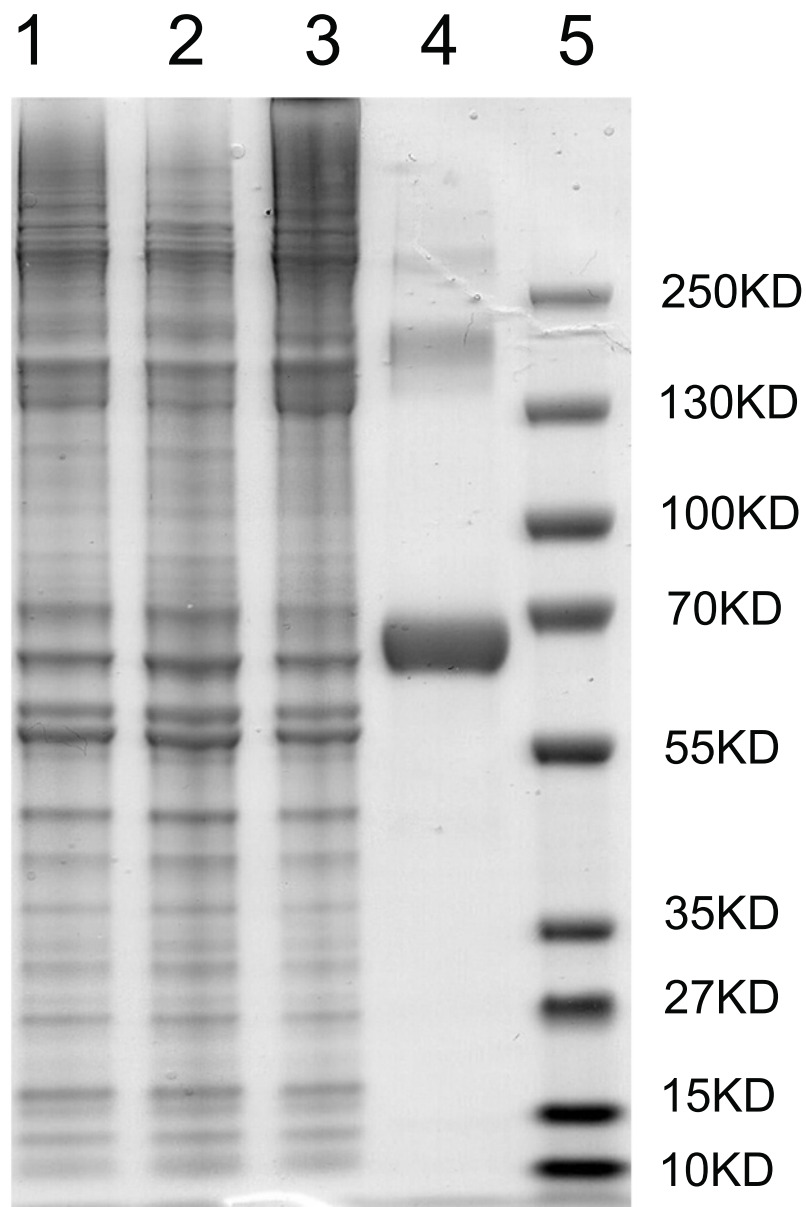

Supplementary Figure. SDS-PAGE of *Lum*<sup>+/+</sup>, *Lum*<sup>+/-</sup> and *Lum*<sup>-/-</sup> mouse corneal proteins. Lane 1: 18μg of *Lum*<sup>-/-</sup> mouse corneal protein; Lane 2: 18μg of *Lum*<sup>+/+</sup> mouse corneal protein; Lane 3: 18μg of *Lum*<sup>+/-</sup> mouse corneal protein; Lane 4: 5μg BSA; Lane 5: marker
