# Supplementary material
Source: PubMed Central journal article supplement (PMC3163732)
Supplement: NIHMS297720-supplement-02.pdf [file NIHMS297720-supplement-02.pdf]

Shao et al 2011. Proteome profiling of wild type and lumican-deficient mouse corneas

Supplementary Table 1: Complete list of proteins identified and quantified in wild type and lumican -deficient mouse corneas

| Gene Symbol   | Description                            | Experiment 1    |                     |                     |                     | Experiment 2    |                     |                     |                     |
|---------------|----------------------------------------|-----------------|---------------------|---------------------|---------------------|-----------------|---------------------|---------------------|---------------------|
|               |                                        | $\Sigma$ # PSMs | $\Sigma$ # Peptides | *Lum <sup>+/-</sup> | *Lum <sup>-/-</sup> | $\Sigma$ # PSMs | $\Sigma$ # Peptides | *Lum <sup>+/-</sup> | *Lum <sup>-/-</sup> |
| 2-Sep         | septin-2 b                             | 39              | 5                   | 0.96                | 0.89                | 34              | 4                   | 0.97                | 0.95                |
| 7-Sep         | septin-7                               | 46              | 6                   | 0.89                | 0.97                | 27              | 4                   | 0.91                | 1.02                |
| 8-Sep         | septin-8                               | 12              | 2                   | 0.85                | 0.93                | ND              | ND                  | ND                  | ND                  |
| 9-Sep         | Septin-9 isoform b                     | 4               | 2                   | 0.91                | 0.95                | 1               | 1                   | 0.83                | 0.87                |
| 10-Sep        | septin-10 isoform 2                    | 17              | 4                   | 0.95                | 1.00                | ND              | ND                  | ND                  | ND                  |
| 15-Sep        | 15 kDa selenoprotein                   | 1               | 1                   | 0.94                | 1.03                | ND              | ND                  | ND                  | ND                  |
| 0610009B22Rik | Hypothetical protein LOC66050          | 2               | 1                   | 0.89                | 0.97                | ND              | ND                  | ND                  | ND                  |
| 1110004F10Rik | small acidic protein                   | 5               | 2                   | 1.79                | 1.22                | ND              | ND                  | ND                  | ND                  |
| 1190003J15Rik | 5-Hydroxyisourate hydrolase            | 23              | 3                   | 1.47                | 1.63                | 15              | 3                   | 1.56                | 1.69                |
| 1700009N14Rik | Hypothetical protein LOC75471          | 19              | 4                   | 2.72                | 1.82                | 12              | 1                   | 12.11               | 10.02               |
| 1700057K13Rik | Hypothetical protein LOC73435          | 1               | 1                   | 0.34                | 0.34                | ND              | ND                  | ND                  | ND                  |
| 1810014F10Rik | Protein fucU homolog                   | 2               | 1                   | 0.86                | 0.89                | ND              | ND                  | ND                  | ND                  |
| 1810020O05Rik | PREDICTED: similar to hCG20001         | 1               | 1                   | ND                  | ND                  | ND              | ND                  | ND                  | ND                  |
| 1810046J19Rik | Hypothetical protein LOC103742         | 2               | 1                   | 1.02                | 1.08                | ND              | ND                  | ND                  | ND                  |
| 1810074P20Rik | hypothetical protein LOC67490          | 3               | 2                   | 1.36                | 5.55                | ND              | ND                  | ND                  | ND                  |
| 2010107G23Rik | hypothetical protein LOC69894          | 1               | 1                   | 0.97                | 0.95                | ND              | ND                  | ND                  | ND                  |
| 2210016F16Rik | hypothetical protein LOC70153          | 2               | 1                   | 1.32                | 1.27                | ND              | ND                  | ND                  | ND                  |
| 2310003F16Rik | huntingtin-interacting protein K       | 1               | 1                   | 0.66                | 0.38                | ND              | ND                  | ND                  | ND                  |
| 2310007B03Rik | hypothetical protein LOC71874          | 1               | 1                   | 0.91                | 0.81                | 3               | 1                   | 0.86                | 0.91                |
| 2310043J07Rik | uropodin-3-like protein                | 14              | 2                   | 0.76                | 0.93                | 8               | 1                   | 0.76                | 1.04                |
| 2510003E04Rik | KIF1-binding protein                   | 1               | 1                   | ND                  | ND                  | 2               | 1                   | 0.00                | 0.00                |
| 2610018G03Rik | serine/threonine-protein kinase MST4   | 4               | 1                   | 0.68                | 0.91                | 3               | 3                   | 0.81                | 0.79                |
| 2610029G23Rik | Hypothetical protein LOC67683          | 1               | 1                   | ND                  | ND                  | 1               | 1                   | 0.00                | 1.09                |
| 2610301G19Rik | p30 DBC protein                        | 6               | 1                   | 1.04                | 1.05                | 1               | 1                   | 0.86                | 0.69                |
| 2700060E02Rik | Hypothetical protein LOC68045          | 7               | 3                   | 0.58                | 0.56                | 4               | 2                   | 0.82                | 0.71                |
| 2700078K21Rik | mps one binder kinase activator-like 2 | 1               | 1                   | 0.89                | 0.92                | ND              | ND                  | ND                  | ND                  |
| 2900010M23Rik | Hypothetical protein LOC67267          | 2               | 1                   | 0.91                | 0.88                | ND              | ND                  | ND                  | ND                  |
| 2900073G15Rik | myosin light chain, regulatory B-like  | 129             | 7                   | 0.95                | 1.09                | ND              | ND                  | ND                  | ND                  |
| 3110003A17Rik | Hypothetical protein LOC73112          | 2               | 1                   | 0.91                | 0.98                | ND              | ND                  | ND                  | ND                  |
| 4732456N10Rik | hypothetical protein LOC239673         | 234             | 7                   | ND                  | ND                  | 101             | 6                   | ND                  | ND                  |

|                      |                                                                |      |    |      |      |      |    |      |       |
|----------------------|----------------------------------------------------------------|------|----|------|------|------|----|------|-------|
| <i>4930583H14Rik</i> | hypoxia up-regulated mitochondrial movement regulator          | 1    | 1  | 0.83 | 0.89 | ND   | ND | ND   | ND    |
| <i>4931406C07Rik</i> | ester hydrolase C11orf54 homolog                               | 4    | 2  | 1.07 | 1.63 | ND   | ND | ND   | ND    |
| <i>5430437P03Rik</i> | BRCA1-A complex subunit MERIT40                                | 1    | 1  | 0.80 | 0.04 | ND   | ND | ND   | ND    |
| <i>6330408A02Rik</i> | hypothetical protein LOC321008                                 | 10   | 1  | 0.95 | 0.90 | 9    | 1  | 0.89 | 0.88  |
| <i>6430527G18Rik</i> | enhanced at puberty protein 1                                  | 2    | 1  | 0.42 | 0.42 | 2    | 1  | 1.71 | 1.76  |
| <i>9030025P20Rik</i> | hypothetical protein LOC100041574                              | 1    | 1  | 0.77 | 3.86 | ND   | ND | ND   | ND    |
| <i>9930032O22Rik</i> | serine protease Desc4                                          | 2    | 1  | 0.67 | 0.55 | 3    | 1  | 0.60 | 0.69  |
| <i>A230050P20Rik</i> | hypothetical protein LOC319278                                 | 1    | 1  | ND   | ND   | ND   | ND | ND   | ND    |
| <i>A2m</i>           | Alpha-2-macroglobulin-P                                        | 1812 | 36 | 1.25 | 0.96 | 1751 | 32 | 1.21 | 0.97  |
| <i>AA986860</i>      | Specifically androgen-regulated gene protein                   | 9    | 5  | 0.97 | 0.89 | 6    | 1  | 0.96 | 0.88  |
| <i>Aacs</i>          | acetoacetyl-CoA synthetase                                     | 17   | 6  | 1.20 | 1.10 | 8    | 2  | 1.18 | 1.24  |
| <i>Aak1</i>          | AP2 associated kinase 1 isoform 2                              | 1    | 1  | 0.53 | 0.70 | ND   | ND | ND   | ND    |
| <i>Aars</i>          | alanyl-tRNA synthetase, cytoplasmic                            | 8    | 3  | 1.04 | 1.12 | 5    | 2  | 1.15 | 1.26  |
| <i>Abat</i>          | 4-aminobutyrate aminotransferase, mitochondrial isoform 2      | 1    | 1  | 1.24 | 1.03 | ND   | ND | ND   | ND    |
| <i>Abcd3</i>         | ATP-binding cassette sub-family D member 3                     | 2    | 1  | 1.30 | 1.26 | 1    | 1  | 1.11 | 13.08 |
| <i>Abce1</i>         | ATP-binding cassette sub-family E member 1                     | 5    | 3  | 1.04 | 0.98 | 6    | 2  | 1.02 | 1.01  |
| <i>Abcf1</i>         | ATP-binding cassette sub-family F member 1                     | 1    | 1  | 0.13 | 0.19 | ND   | ND | ND   | ND    |
| <i>Abhd12</i>        | Monoacylglycerol lipase ABHD12                                 | 10   | 3  | 0.80 | 0.90 | 7    | 3  | 0.68 | 0.95  |
| <i>Abhd14b</i>       | abhydrolase domain-containing protein 14B                      | 13   | 4  | 0.92 | 1.19 | 5    | 2  | 1.25 | 1.24  |
| <i>Abi1</i>          | Abl interactor 1 isoform 5                                     | 1    | 1  | 1.11 | 1.23 | 2    | 1  | 0.93 | 1.17  |
| <i>Ablim1</i>        | Actin-binding LIM protein 1 isoform 3                          | 10   | 2  | 0.95 | 0.94 | 3    | 1  | 0.90 | 0.99  |
| <i>Acaa1a</i>        | 3-ketoacyl-CoA thiolase A, peroxisomal                         | 23   | 5  | 1.18 | 1.13 | 10   | 3  | 1.11 | 1.21  |
| <i>Acaa2</i>         | 3-ketoacyl-CoA thiolase, mitochondrial                         | 39   | 6  | 0.91 | 0.94 | 36   | 6  | 0.92 | 0.83  |
| <i>Acaca</i>         | Acetyl-CoA carboxylase 1                                       | 3    | 1  | 1.36 | 1.25 | ND   | ND | ND   | ND    |
| <i>Acad9</i>         | Acyl-CoA dehydrogenase family member 9, mitochondrial          | 2    | 1  | 0.83 | 1.00 | 6    | 1  | 0.71 | 0.93  |
| <i>Acadl</i>         | long-chain specific acyl-CoA dehydrogenase, mitochondrial      | 18   | 2  | 1.01 | 0.99 | 12   | 2  | 1.02 | 0.97  |
| <i>Acadm</i>         | medium-chain specific acyl-CoA dehydrogenase, mitochondrial    | 11   | 2  | 0.82 | 0.82 | 15   | 4  | 0.97 | 0.90  |
| <i>Acads</i>         | short-chain specific acyl-CoA dehydrogenase, mitochondrial     | 1    | 1  | 1.48 | 1.70 | ND   | ND | ND   | ND    |
| <i>Acadvl</i>        | very long-chain specific acyl-CoA dehydrogenase, mitochondrial | 16   | 4  | 1.01 | 0.97 | 7    | 4  | 1.13 | 1.06  |
| <i>Acap2</i>         | arf-GAP with coiled-coil, ANK repeat and PH domain-containing  | 6    | 1  | 1.09 | 1.25 | 8    | 2  | 1.06 | 1.29  |
| <i>Acat1</i>         | acetyl-CoA acetyltransferase, mitochondrial                    | 15   | 5  | 1.01 | 0.94 | 19   | 4  | 0.97 | 1.01  |
| <i>Acat3</i>         | Acetyl-Coenzyme A acetyltransferase 3                          | 3    | 1  | 1.72 | 0.88 | 4    | 2  | 1.26 | 0.86  |
| <i>Acbd3</i>         | golgi resident protein GCP60                                   | 2    | 1  | 2.14 | 1.24 | ND   | ND | ND   | ND    |
| <i>Acin1</i>         | apoptotic chromatin condensation inducer 1 isoform 4           | 5    | 3  | 1.18 | 0.66 | 2    | 1  | 1.18 | 1.33  |

|               |                                                            |     |    |       |       |     |    |      |      |
|---------------|------------------------------------------------------------|-----|----|-------|-------|-----|----|------|------|
| <i>Acly</i>   | ATP-citrate synthase                                       | 118 | 16 | 0.87  | 0.98  | 102 | 14 | 0.88 | 0.95 |
| <i>Aco1</i>   | Cytoplasmic aconitate hydratase                            | 8   | 4  | 1.08  | 1.17  | 7   | 4  | 1.39 | 1.53 |
| <i>Aco2</i>   | aconitate hydratase, mitochondrial                         | 37  | 5  | 0.87  | 0.92  | 39  | 6  | 0.92 | 0.97 |
| <i>Acot9</i>  | acyl-coenzyme A thioesterase 9, mitochondrial              | 1   | 1  | 5.19  | 4.19  | ND  | ND | ND   | ND   |
| <i>Acox3</i>  | peroxisomal acyl-coenzyme A oxidase 3                      | 1   | 1  | ND    | ND    | ND  | ND | ND   | ND   |
| <i>Acp5</i>   | tartrate-resistant acid phosphatase type 5                 | 1   | 1  | 1.07  | 1.02  | ND  | ND | ND   | ND   |
| <i>Acsf2</i>  | acyl-CoA synthetase family member 2, mitochondrial         | 6   | 1  | 1.31  | 1.01  | 6   | 1  | 1.03 | 1.08 |
| <i>Acsf3</i>  | Acyl-CoA synthetase family member 3, mitochondrial         | 3   | 1  | 1.00  | 0.95  | ND  | ND | ND   | ND   |
| <i>Acs1</i>   | long-chain-fatty-acid--CoA ligase 1                        | 30  | 8  | 0.89  | 0.97  | 33  | 6  | 1.06 | 1.00 |
| <i>Acsm1</i>  | Acyl-coenzyme A synthetase ACSM1, mitochondrial            | 4   | 2  | 15.76 | 7.16  | 1   | 1  | 1.07 | 1.13 |
| <i>Actb</i>   | actin, cytoplasmic 1                                       | 959 | 13 | 0.96  | 0.97  | 824 | 11 | 0.95 | 0.98 |
| <i>Actl6a</i> | actin-like protein 6A                                      | 1   | 1  | 0.91  | 1.01  | 3   | 1  | 0.93 | 0.98 |
| <i>Actn1</i>  | alpha-actinin-1                                            | 240 | 12 | 0.94  | 0.90  | 262 | 9  | 1.09 | 0.89 |
| <i>Actn4</i>  | Alpha-actinin-4                                            | 581 | 22 | 0.93  | 0.95  | 541 | 20 | 0.91 | 0.95 |
| <i>Actr1a</i> | alpha-centractin                                           | 33  | 6  | 0.83  | 0.92  | 28  | 4  | 0.98 | 0.94 |
| <i>Actr1b</i> | beta-centractin                                            | 15  | 3  | 0.83  | 1.03  | ND  | ND | ND   | ND   |
| <i>Actr2</i>  | actin-related protein 2                                    | 99  | 8  | 1.06  | 1.15  | 73  | 5  | 1.00 | 1.06 |
| <i>Actr3</i>  | actin-related protein 3                                    | 63  | 11 | 1.11  | 1.32  | 49  | 8  | 1.01 | 1.12 |
| <i>Actr3b</i> | actin-related protein 3B                                   | 9   | 3  | 0.79  | 1.03  | ND  | ND | ND   | ND   |
| <i>Actr8</i>  | actin-related protein 8                                    | 1   | 1  | ND    | 55.59 | ND  | ND | ND   | ND   |
| <i>Add1</i>   | alpha-adducin isoform 2                                    | 3   | 2  | 0.98  | 0.75  | 3   | 2  | 1.10 | 1.11 |
| <i>Add3</i>   | gamma-adducin isoform b                                    | 6   | 4  | 0.89  | 1.13  | 5   | 3  | 0.83 | 0.96 |
| <i>Adh1</i>   | alcohol dehydrogenase 1                                    | 81  | 7  | 5.00  | 5.20  | 63  | 5  | 6.01 | 6.26 |
| <i>Adh5</i>   | alcohol dehydrogenase class-3                              | 10  | 3  | 1.63  | 1.41  | 3   | 2  | 1.38 | 1.18 |
| <i>Adh7</i>   | alcohol dehydrogenase class 4 mu/sigma chain               | 347 | 9  | 1.09  | 1.28  | 304 | 9  | 1.18 | 1.21 |
| <i>Adsl</i>   | adenylosuccinate lyase                                     | 4   | 1  | 1.04  | 0.89  | 2   | 1  | 0.96 | 0.84 |
| <i>Adss</i>   | adenylosuccinate synthetase isozyme 2                      | 54  | 7  | 1.19  | 1.15  | 41  | 6  | 1.13 | 1.18 |
| <i>Aebp1</i>  | Adipocyte enhancer-binding protein 1                       | 260 | 12 | 1.33  | 3.50  | 233 | 10 | 1.36 | 3.23 |
| <i>Aga</i>    | n(4)-(beta-N-acetylglucosaminy)-L-asparaginase             | 2   | 1  | 0.96  | 0.88  | 2   | 1  | 0.89 | 0.94 |
| <i>Agfg1</i>  | arf-GAP domain and FG repeats-containing protein 1         | 2   | 1  | 0.41  | 1.61  | ND  | ND | ND   | ND   |
| <i>Agfg2</i>  | arf-GAP domain and FG repeats-containing protein 2 isoform | 8   | 2  | 0.82  | 0.38  | 5   | 1  | 0.30 | 4.12 |
| <i>Agpat3</i> | 1-acyl-sn-glycerol-3-phosphate acyltransferase gamma       | 2   | 1  | 1.13  | 1.16  | ND  | ND | ND   | ND   |
| <i>Agpat9</i> | glycerol-3-phosphate acyltransferase 3                     | 1   | 1  | ND    | ND    | ND  | ND | ND   | ND   |
| <i>Agri</i>   | agrin                                                      | 6   | 2  | 1.53  | 1.13  | 5   | 2  | 1.12 | 0.92 |

|                 |                                                              |     |    |      |      |     |    |      |      |
|-----------------|--------------------------------------------------------------|-----|----|------|------|-----|----|------|------|
| <i>Ahcy</i>     | adenosylhomocysteinase                                       | 8   | 3  | 0.97 | 1.07 | ND  | ND | ND   | ND   |
| <i>Ahnak</i>    | AHNAK nucleoprotein isoform 1                                | 866 | 84 | 0.92 | 0.91 | 767 | 71 | 0.91 | 0.93 |
| <i>Ahsa1</i>    | activator of 90 kDa heat shock protein ATPase homolog 1      | 17  | 2  | 0.91 | 1.03 | 9   | 1  | 0.89 | 1.04 |
| <i>Ahsg</i>     | alpha-2-HS-glycoprotein                                      | 7   | 1  | 0.88 | 0.53 | 10  | 1  | 0.93 | 0.63 |
| <i>AI314180</i> | expressed sequence AI314180                                  | 2   | 1  | 1.02 | 0.88 | 5   | 1  | 0.77 | 0.99 |
| <i>AI661453</i> | Hypothetical protein LOC224833                               | 32  | 9  | 0.95 | 0.99 | 34  | 10 | 0.98 | 1.11 |
| <i>Aifm1</i>    | apoptosis-inducing factor 1, mitochondrial                   | 3   | 2  | 1.34 | 1.29 | ND  | ND | ND   | ND   |
| <i>Aim1</i>     | Absent in melanoma 1                                         | 4   | 2  | 1.70 | 1.18 | 9   | 4  | 1.58 | 1.32 |
| <i>Aim1l</i>    | absent in melanoma 1-like                                    | 4   | 2  | 1.57 | 1.22 | ND  | ND | ND   | ND   |
| <i>Aimp1</i>    | Aminoacyl tRNA synthetase complex-interacting multifunction  | 16  | 2  | 0.95 | 1.02 | 12  | 2  | 0.96 | 1.03 |
| <i>Aimp2</i>    | aminoacyl tRNA synthetase complex-interacting multifunction  | 6   | 3  | 0.94 | 0.89 | ND  | ND | ND   | ND   |
| <i>Aip</i>      | AH receptor-interacting protein                              | 2   | 1  | 1.17 | 1.00 | ND  | ND | ND   | ND   |
| <i>Ak1</i>      | Adenylate kinase isoenzyme 1                                 | 8   | 2  | 1.17 | 1.08 | 5   | 1  | 0.95 | 1.11 |
| <i>Ak3</i>      | GTP:AMP phosphotransferase mitochondrial                     | 12  | 2  | 0.83 | 0.86 | 15  | 2  | 0.87 | 0.86 |
| <i>Akap8</i>    | A-kinase anchor protein 8                                    | 3   | 1  | 1.22 | 0.87 | ND  | ND | ND   | ND   |
| <i>Akr1b3</i>   | Aldose reductase                                             | 65  | 4  | 0.89 | 0.96 | 47  | 5  | 0.84 | 0.98 |
| <i>Akr1b7</i>   | Aldose reductase-related protein 1                           | 16  | 4  | 0.95 | 1.07 | 6   | 3  | 0.88 | 0.94 |
| <i>Akr1c13</i>  | aldo-keto reductase family 1 member C13                      | 2   | 1  | 0.60 | 1.04 | ND  | ND | ND   | ND   |
| <i>Akr7a5</i>   | aflatoxin B1 aldehyde reductase member 2                     | 3   | 3  | 1.07 | 1.26 | ND  | ND | ND   | ND   |
| <i>Akt3</i>     | RAC-gamma serine/threonine-protein kinase                    | 1   | 1  | ND   | ND   | 1   | 1  | ND   | ND   |
| <i>Alad</i>     | delta-aminolevulinic acid dehydratase                        | 25  | 5  | 0.96 | 1.13 | 17  | 5  | 1.13 | 1.08 |
| <i>Alb</i>      | Albumin                                                      | 630 | 18 | 0.85 | 0.46 | 639 | 16 | 0.82 | 0.48 |
| <i>Alcam</i>    | CD166 antigen                                                | 23  | 6  | 0.91 | 0.86 | 21  | 4  | 1.01 | 0.85 |
| <i>Aldh1a1</i>  | retinal dehydrogenase 1                                      | 100 | 9  | 0.94 | 0.92 | 102 | 8  | 0.91 | 0.92 |
| <i>Aldh1a3</i>  | aldehyde dehydrogenase family 1 member A3                    | 2   | 1  | 1.26 | 1.12 | 3   | 1  | 1.25 | 1.10 |
| <i>Aldh2</i>    | aldehyde dehydrogenase, mitochondrial                        | 122 | 13 | 0.94 | 0.96 | 116 | 9  | 0.96 | 0.91 |
| <i>Aldh3a1</i>  | Aldehyde dehydrogenase, dimeric NADP-preferring              | 864 | 13 | 0.89 | 1.04 | 679 | 11 | 0.87 | 1.05 |
| <i>Aldh3b1</i>  | aldehyde dehydrogenase family 3 member B1                    | 65  | 3  | ND   | ND   | 16  | 4  | 0.93 | 1.04 |
| <i>Aldh3b2</i>  | PREDICTED: similar to Aldehyde dehydrogenase 3 family, m     | 64  | 6  | 1.02 | 1.08 | 42  | 7  | 1.00 | 1.09 |
| <i>Aldh4a1</i>  | delta-1-pyrroline-5-carboxylate dehydrogenase, mitochondrial | 2   | 1  | 0.77 | 0.80 | ND  | ND | ND   | ND   |
| <i>Aldh6a1</i>  | methylmalonate-semialdehyde dehydrogenase [acylating], mi    | 16  | 6  | 0.87 | 0.89 | 14  | 5  | 1.05 | 0.93 |
| <i>Aldh7a1</i>  | alpha-amino adipic semialdehyde dehydrogenase isoform b      | 14  | 2  | 1.37 | 1.61 | 6   | 2  | 1.31 | 1.56 |
| <i>Aldh9a1</i>  | 4-Trimethylaminobutyraldehyde dehydrogenase                  | 1   | 1  | 1.78 | 1.09 | ND  | ND | ND   | ND   |
| <i>Aldoa</i>    | fructose-bisphosphate aldolase A                             | 136 | 6  | 1.04 | 0.86 | 125 | 5  | 1.00 | 0.83 |

|                |                                                             |     |    |      |      |     |    |      |      |
|----------------|-------------------------------------------------------------|-----|----|------|------|-----|----|------|------|
| <i>Aldoc</i>   | fructose-bisphosphate aldolase C                            | 34  | 6  | 1.07 | 1.10 | 31  | 3  | 0.74 | 0.99 |
| <i>Angptl7</i> | angiopoietin-related protein 7                              | 111 | 5  | 1.46 | 0.92 | 108 | 4  | 1.41 | 0.87 |
| <i>Ank3</i>    | Ankyrin 3, epithelial isoform i                             | 2   | 1  | 1.03 | 0.95 | ND  | ND | ND   | ND   |
| <i>Ankfy1</i>  | ankyrin repeat and FYVE domain-containing protein 1         | 1   | 1  | 0.89 | 1.03 | ND  | ND | ND   | ND   |
| <i>Ankrd57</i> | ankyrin repeat domain-containing protein 57                 | 3   | 2  | 0.90 | 0.97 | 3   | 1  | 0.81 | 1.01 |
| <i>Anp32a</i>  | acidic leucine-rich nuclear phosphoprotein 32 family member | 69  | 6  | 1.04 | 1.04 | 55  | 3  | 1.09 | 1.05 |
| <i>Anp32b</i>  | acidic leucine-rich nuclear phosphoprotein 32 family member | 12  | 3  | 1.37 | 1.29 | 13  | 3  | 1.23 | 1.23 |
| <i>Anp32e</i>  | acidic leucine-rich nuclear phosphoprotein 32 family member | 2   | 2  | 1.58 | 1.89 | ND  | ND | ND   | ND   |
| <i>Anpep</i>   | aminopeptidase N                                            | 24  | 7  | 1.05 | 1.03 | 10  | 5  | 0.99 | 0.95 |
| <i>Antxr1</i>  | anthrax toxin receptor 1                                    | 1   | 1  | 1.17 | 2.00 | ND  | ND | ND   | ND   |
| <i>Anxa1</i>   | Annexin A1                                                  | 417 | 11 | 1.07 | 0.97 | 371 | 11 | 1.03 | 0.96 |
| <i>Anxa11</i>  | Annexin A11                                                 | 71  | 9  | 1.01 | 1.04 | 53  | 9  | 0.99 | 1.05 |
| <i>Anxa2</i>   | annexin A2                                                  | 555 | 13 | 0.91 | 0.90 | 444 | 12 | 0.92 | 0.93 |
| <i>Anxa3</i>   | Annexin A3                                                  | 28  | 6  | 0.93 | 0.77 | 38  | 7  | 0.91 | 0.94 |
| <i>Anxa4</i>   | Annexin A4                                                  | 42  | 5  | 0.90 | 0.79 | 25  | 3  | 0.96 | 0.97 |
| <i>Anxa5</i>   | annexin A5                                                  | 214 | 13 | 0.92 | 0.90 | 215 | 9  | 0.91 | 0.87 |
| <i>Anxa6</i>   | Annexin A6 isoform b                                        | 73  | 12 | 0.99 | 0.87 | 66  | 9  | 0.99 | 0.78 |
| <i>Anxa7</i>   | Annexin A7                                                  | 63  | 8  | 1.09 | 0.95 | 43  | 5  | 1.13 | 1.04 |
| <i>Anxa8</i>   | annexin A8                                                  | 148 | 11 | 1.06 | 0.98 | 148 | 10 | 0.97 | 0.96 |
| <i>Anxa9</i>   | Annexin A9                                                  | 10  | 3  | 0.83 | 0.87 | 4   | 2  | 0.99 | 0.91 |
| <i>Ap1b1</i>   | AP-1 complex subunit beta-1                                 | 37  | 6  | 0.97 | 0.89 | ND  | ND | ND   | ND   |
| <i>Ap1g1</i>   | AP-1 complex subunit gamma-1                                | 2   | 1  | 0.87 | 0.94 | 3   | 1  | 1.54 | 1.51 |
| <i>Ap1m2</i>   | AP-1 complex subunit mu-2 isoform 2                         | 2   | 1  | ND   | ND   | 5   | 3  | 0.86 | 1.03 |
| <i>Ap1s1</i>   | AP-1 complex subunit sigma-1A                               | 2   | 1  | 0.60 | 1.04 | 7   | 1  | 1.05 | 1.21 |
| <i>Ap2a1</i>   | AP-2 complex subunit alpha-1 isoform b                      | 17  | 4  | 0.99 | 1.03 | 12  | 3  | 1.19 | 0.94 |
| <i>Ap2a2</i>   | AP-2 complex subunit alpha-2                                | 16  | 5  | 1.20 | 1.21 | ND  | ND | ND   | ND   |
| <i>Ap2b1</i>   | AP-2 complex subunit beta isoform b                         | 20  | 3  | 1.08 | 0.95 | ND  | ND | ND   | ND   |
| <i>Ap2m1</i>   | AP-2 complex subunit mu                                     | 3   | 2  | 1.06 | 1.19 | 7   | 3  | 1.07 | 1.07 |
| <i>Ap3b1</i>   | AP-3 complex subunit beta-1                                 | 2   | 2  | 0.83 | 0.88 | ND  | ND | ND   | ND   |
| <i>Ap3d1</i>   | AP-3 complex subunit delta-1                                | 2   | 1  | 0.44 | 1.22 | 2   | 1  | 0.95 | 0.78 |
| <i>Apeh</i>    | acylamino-acid-releasing enzyme                             | 6   | 2  | 2.63 | 1.00 | 7   | 3  | 1.00 | 0.93 |
| <i>Apex1</i>   | DNA-(apurinic or apyrimidinic site) lyase                   | 12  | 2  | 0.87 | 1.03 | 6   | 3  | 0.98 | 1.65 |
| <i>Apip</i>    | APAF1-interacting protein                                   | 1   | 1  | 1.14 | 1.38 | 2   | 1  | 0.94 | 0.91 |
| <i>Apoa1</i>   | Apolipoprotein A-I                                          | 27  | 3  | 1.28 | 0.70 | 23  | 3  | 1.33 | 0.70 |

|                 |                                                                 |     |   |      |      |    |    |      |      |
|-----------------|-----------------------------------------------------------------|-----|---|------|------|----|----|------|------|
| <i>Apoa1bp</i>  | apolipoprotein A-I-binding protein                              | 26  | 3 | 1.03 | 1.28 | 20 | 3  | 1.30 | 1.23 |
| <i>Apoa4</i>    | Apolipoprotein A-IV                                             | 5   | 2 | 1.30 | 1.09 | 1  | 1  | 0.88 | 0.80 |
| <i>Apod</i>     | apolipoprotein D                                                | 7   | 2 | 1.22 | 0.59 | 1  | 1  | 1.05 | 0.64 |
| <i>ApoE</i>     | Apolipoprotein E                                                | 19  | 2 | 1.21 | 1.01 | 16 | 2  | 1.32 | 1.17 |
| <i>ApoH</i>     | Beta-2-glycoprotein 1                                           | 9   | 3 | 1.44 | 1.02 | 5  | 2  | 1.26 | 0.90 |
| <i>Aprt</i>     | Adenine phosphoribosyltransferase                               | 6   | 1 | 1.12 | 1.07 | 7  | 2  | 1.15 | 1.13 |
| <i>Aqp1</i>     | aquaporin-1                                                     | 97  | 2 | 1.14 | 1.13 | 79 | 2  | 1.10 | 1.11 |
| <i>Aqp3</i>     | Aquaporin-3                                                     | 4   | 1 | 0.71 | 0.65 | 2  | 1  | 0.78 | 0.77 |
| <i>Aqp5</i>     | aquaporin-5                                                     | 127 | 3 | 1.14 | 1.19 | 67 | 2  | 1.14 | 1.18 |
| <i>Arcn1</i>    | Coatamer subunit delta                                          | 11  | 6 | 0.84 | 0.88 | 5  | 3  | 0.72 | 0.80 |
| <i>Arf1</i>     | ADP-ribosylation factor 1                                       | 135 | 6 | 1.04 | 1.01 | 67 | 6  | 1.06 | 0.97 |
| <i>Arf4</i>     | ADP-ribosylation factor 4                                       | 57  | 5 | 1.09 | 1.11 | ND | ND | ND   | ND   |
| <i>Arf5</i>     | ADP-ribosylation factor 5                                       | 100 | 6 | 1.10 | 1.09 | 58 | 6  | 1.15 | 1.09 |
| <i>Arf6</i>     | ADP-ribosylation factor 6                                       | 4   | 2 | 0.95 | 0.57 | 8  | 2  | 1.18 | 1.54 |
| <i>Arfip1</i>   | ADP-ribosylation factor interacting protein 1                   | 2   | 1 | 0.76 | 5.05 | 5  | 3  | 1.05 | 1.19 |
| <i>Arg1</i>     | arginase-1                                                      | 3   | 1 | 1.50 | 1.37 | ND | ND | ND   | ND   |
| <i>Arhgap1</i>  | rho GTPase-activating protein 1 isoform 2                       | 27  | 3 | 1.04 | 1.08 | 28 | 3  | 1.03 | 1.01 |
| <i>Arhgap27</i> | rho GTPase-activating protein 27 isoform 1                      | 1   | 1 | 1.17 | 1.16 | ND | ND | ND   | ND   |
| <i>Arhgdia</i>  | rho GDP-dissociation inhibitor 1                                | 55  | 3 | 0.95 | 0.97 | 54 | 3  | 0.96 | 1.09 |
| <i>Arhgdib</i>  | rho GDP-dissociation inhibitor 2                                | 6   | 2 | 0.64 | 0.87 | 7  | 1  | 1.24 | 1.17 |
| <i>Arhgef1</i>  | rho guanine nucleotide exchange factor 1 isoform d              | 1   | 1 | 0.80 | 2.08 | ND | ND | ND   | ND   |
| <i>Arih1</i>    | Protein ariadne-1 homolog                                       | 3   | 1 | 0.93 | 0.88 | ND | ND | ND   | ND   |
| <i>Arl1</i>     | ADP-ribosylation factor-like protein 1                          | 2   | 2 | 1.05 | 1.06 | 3  | 2  | 1.18 | 1.28 |
| <i>Arl2</i>     | ADP-ribosylation factor-like protein 2                          | 2   | 1 | 1.15 | 1.29 | ND | ND | ND   | ND   |
| <i>Arl3</i>     | ADP-ribosylation factor-like 3                                  | 1   | 1 | 1.57 | 1.17 | 1  | 1  | 1.12 | 1.03 |
| <i>Arl6ip5</i>  | PRA1 family protein 3                                           | 3   | 1 | 1.30 | 1.21 | 8  | 2  | 1.13 | 1.26 |
| <i>Arl8b</i>    | ADP-ribosylation factor-like protein 8B                         | 6   | 3 | 1.07 | 1.06 | 3  | 2  | 0.98 | 1.02 |
| <i>Arpc1a</i>   | actin-related protein 2/3 complex subunit 1A                    | 1   | 1 | 0.89 | 0.91 | ND | ND | ND   | ND   |
| <i>Arpc2</i>    | Actin-related protein 2/3 complex subunit 2                     | 16  | 3 | 0.81 | 0.91 | 3  | 2  | 1.57 | 0.85 |
| <i>Arpc3</i>    | actin-related protein 2/3 complex subunit 3                     | 33  | 4 | 1.04 | 1.02 | 12 | 3  | 0.99 | 1.04 |
| <i>Arpc4</i>    | Actin-related protein 2/3 complex subunit 4 isoform 1           | 67  | 4 | 1.04 | 1.11 | 46 | 3  | 1.01 | 1.10 |
| <i>Arpc5</i>    | actin-related protein 2/3 complex subunit 5                     | 13  | 2 | 1.00 | 0.96 | 17 | 2  | 1.01 | 0.99 |
| <i>Arpc5l</i>   | actin-related protein 2/3 complex subunit 5-like protein        | 10  | 2 | 0.99 | 1.02 | 8  | 2  | 1.03 | 1.10 |
| <i>Arvcf</i>    | armadillo repeat protein deleted in velo-cardio-facial syndrome | 1   | 1 | 1.42 | 1.09 | ND | ND | ND   | ND   |

|                      |                                                              |     |    |      |      |     |    |       |      |
|----------------------|--------------------------------------------------------------|-----|----|------|------|-----|----|-------|------|
| <i>As3mt</i>         | Arsenite methyltransferase                                   | 1   | 1  | ND   | ND   | ND  | ND | ND    | ND   |
| <i>Asap2</i>         | Arf-GAP with SH3 domain, ANK repeat and PH domain-conta      | 1   | 1  | 1.53 | 2.32 | ND  | ND | ND    | ND   |
| <i>Asl</i>           | argininosuccinate lyase                                      | 9   | 2  | 1.13 | 1.44 | 10  | 2  | 1.24  | 1.28 |
| <i>Asna1</i>         | ATPase Asna1                                                 | 2   | 1  | 0.88 | 0.88 | 1   | 1  | 0.86  | 0.85 |
| <i>Asph</i>          | Aspartyl/asparaginyl beta-hydroxylase isoform 1              | 52  | 8  | 0.96 | 0.96 | 53  | 8  | 0.91  | 0.98 |
| <i>Asprv1</i>        | Retroviral-like aspartic protease 1                          | 58  | 3  | 0.95 | 0.74 | 57  | 3  | 0.90  | 0.68 |
| <i>Ass1</i>          | argininosuccinate synthase                                   | 30  | 3  | 1.18 | 1.04 | 7   | 2  | 1.21  | 0.91 |
| <i>Atg3</i>          | Autophagy-related protein 3                                  | 2   | 1  | 1.20 | 1.32 | 3   | 1  | 0.96  | 1.10 |
| <i>Atg5</i>          | Autophagy protein 5                                          | 1   | 1  | 0.83 | 0.84 | ND  | ND | ND    | ND   |
| <i>Atl2</i>          | Atlastin-2 isoform 2                                         | 2   | 1  | 1.07 | 1.21 | ND  | ND | ND    | ND   |
| <i>Atl3</i>          | atlastin-3 isoform 1                                         | 1   | 1  | ND   | 1.76 | ND  | ND | ND    | ND   |
| <i>Atp1a1</i>        | sodium/potassium-transporting ATPase subunit alpha-1         | 228 | 20 | 0.98 | 0.92 | 166 | 15 | 0.97  | 0.95 |
| <i>Atp1a2</i>        | sodium/potassium-transporting ATPase subunit alpha-2         | 82  | 7  | 0.97 | 0.97 | ND  | ND | ND    | ND   |
| <i>Atp1b1</i>        | sodium/potassium-transporting ATPase subunit beta-1          | 7   | 3  | 0.90 | 1.06 | 1   | 1  | 1.13  | 1.08 |
| <i>Atp1b3</i>        | sodium/potassium-transporting ATPase subunit beta-3          | 28  | 3  | 0.82 | 0.85 | 25  | 1  | 0.82  | 0.87 |
| <i>Atp2a2</i>        | ATPase, Ca++ transporting, slow twitch 2 isoform b           | 14  | 6  | 1.08 | 1.02 | 16  | 4  | 1.01  | 1.11 |
| <i>Atp2b1</i>        | plasma membrane calcium ATPase 1                             | 8   | 4  | 1.00 | 1.01 | 5   | 2  | 0.91  | 0.86 |
| <i>Atp5a1</i>        | ATP synthase subunit alpha, mitochondrial                    | 211 | 12 | 0.88 | 0.90 | 181 | 12 | 0.87  | 0.91 |
| <i>Atp5b</i>         | ATP synthase subunit beta, mitochondrial                     | 416 | 12 | 0.88 | 0.90 | 364 | 12 | 0.86  | 0.89 |
| <i>Atp5c1</i>        | ATP synthase subunit gamma, mitochondrial isoform b          | 5   | 2  | 0.78 | 0.96 | ND  | ND | ND    | ND   |
| <i>Atp5d</i>         | ATP synthase subunit delta, mitochondrial                    | 15  | 1  | 1.07 | 1.07 | 21  | 1  | 1.06  | 1.04 |
| <i>Atp5f1</i>        | ATP synthase subunit b, mitochondrial                        | 3   | 1  | 0.76 | 0.58 | ND  | ND | ND    | ND   |
| <i>Atp5j2</i>        | ATP synthase subunit f, mitochondrial                        | 10  | 2  | 1.30 | 1.01 | 8   | 2  | 1.23  | 0.92 |
| <i>Atp5k</i>         | ATP synthase subunit e, mitochondrial                        | 2   | 1  | 1.37 | 1.03 |     |    | ND    | ND   |
| <i>Atp6v1a</i>       | V-type proton ATPase catalytic subunit A                     | 37  | 5  | 1.02 | 1.04 | 43  | 7  | 0.96  | 0.98 |
| <i>Atp6v1b2</i>      | V-type proton ATPase subunit B, brain isoform                | 25  | 6  | 0.89 | 0.88 | 13  | 4  | 0.92  | 0.97 |
| <i>Atp6v1d</i>       | V-type proton ATPase subunit D                               | 1   | 1  | 1.09 | 1.03 | ND  | ND | ND    | ND   |
| <i>Atp6v1e1</i>      | V-type proton ATPase subunit E 1                             | 9   | 1  | 0.78 | 0.70 | 15  | 2  | 0.85  | 0.76 |
| <i>Atp6v1f</i>       | V-type proton ATPase subunit F                               | 3   | 1  | 1.33 | 1.41 | 6   | 1  | 1.16  | 1.19 |
| <i>Atp6v1h</i>       | V-type proton ATPase subunit H                               | 9   | 3  | 1.17 | 1.40 | 3   | 1  | 1.03  | 1.28 |
| <i>ATP8</i>          | ATP synthase F0 subunit 8 [Mus musculus musculus]            | 1   | 1  | 1.16 | 1.07 | ND  | ND | ND    | ND   |
| <i>Atp8a1</i>        | probable phospholipid-transporting ATPase IA isoform b       | 3   | 1  | 1.40 | 1.53 | 1   | 1  | 1.08  | 1.21 |
| <i>B230120H23Rik</i> | mitogen-activated protein kinase kinase kinase MLT isoform 3 | 1   | 1  | 0.90 | 0.86 | ND  | ND | ND    | ND   |
| <i>B230208H17Rik</i> | Putative GTP-binding protein Parf                            | 5   | 1  | ND   | ND   | 3   | 1  | 18.34 | 0.85 |

|                 |                                                                         |     |    |       |       |     |    |      |       |
|-----------------|-------------------------------------------------------------------------|-----|----|-------|-------|-----|----|------|-------|
| <i>B4galnt2</i> | beta-1,4 N-acetylgalactosaminyltransferase 2                            | 2   | 1  | ND    | ND    | 3   | 1  | 0.97 | 0.97  |
| <i>Bag1</i>     | BAG family molecular chaperone regulator 1 isoform 1S                   | 1   | 1  | 0.81  | 1.19  | 2   | 1  | 0.95 | 1.05  |
| <i>Bag2</i>     | BAG family molecular chaperone regulator 2                              | 3   | 1  | 0.85  | 1.03  | 3   | 1  | 0.84 | 0.96  |
| <i>Bag3</i>     | BAG family molecular chaperone regulator 3                              | 8   | 2  | 0.89  | 0.93  | 5   | 2  | 1.07 | 0.97  |
| <i>Baiap2</i>   | brain-specific angiogenesis inhibitor 1-associated protein 2 isoform 21 | 21  | 2  | 0.95  | 0.80  | ND  | ND | ND   | ND    |
| <i>Baiap2</i>   | brain-specific angiogenesis inhibitor 1-associated protein 2 isoform 10 | 10  | 1  | 1.00  | 0.83  | ND  | ND | ND   | ND    |
| <i>Baiap211</i> | brain-specific angiogenesis inhibitor 1-associated protein 2-like 2     | 2   | 1  | 0.88  | 1.10  | ND  | ND | ND   | ND    |
| <i>Baiap212</i> | brain-specific angiogenesis inhibitor 1-associated protein 2-like 3     | 3   | 1  | 5.59  | 1.92  | 1   | 1  | 9.16 | 3.76  |
| <i>Banf1</i>    | barrier-to-autointegration factor                                       | 7   | 2  | 4.61  | 4.01  | 9   | 1  | 8.95 | 7.67  |
| <i>Bat1a</i>    | spliceosome RNA helicase Bat1                                           | 26  | 4  | 0.84  | 0.84  | 25  | 6  | 0.89 | 0.93  |
| <i>Bat3</i>     | large proline-rich protein BAT3                                         | 1   | 1  | 1.11  | 0.93  | 2   | 1  | 0.96 | 0.94  |
| <i>Bax</i>      | apoptosis regulator BAX                                                 | 1   | 1  | 2.25  | 1.78  | ND  | ND | ND   | ND    |
| <i>BC016423</i> | Peripheral benzodiazepine receptor associated protein                   | 8   | 1  | 2.35  | 15.75 | 9   | 1  | 2.21 | 15.02 |
| <i>BC030476</i> | hypothetical protein LOC239368                                          | 8   | 4  | 1.02  | 0.97  | 11  | 4  | 1.00 | 1.04  |
| <i>BC048355</i> | Deoxyribonucleoside 5'-monophosphate N-glycosidase                      | 3   | 1  | 11.96 | 1.06  | ND  | ND | ND   | ND    |
| <i>BC117090</i> | Stefin A1-like protein                                                  | 48  | 2  | 0.79  | 0.91  | 27  | 1  | 0.85 | 0.95  |
| <i>Bcam</i>     | Basal cell adhesion molecule                                            | 6   | 1  | 0.97  | 0.88  | ND  | ND | ND   | ND    |
| <i>Bcl2l13</i>  | bcl-2-like protein 13                                                   | 21  | 6  | 0.85  | 0.88  | 19  | 3  | 0.89 | 0.92  |
| <i>Bdh1</i>     | D-beta-hydroxybutyrate dehydrogenase, mitochondrial                     | 3   | 1  | 1.29  | 0.76  | ND  | ND | ND   | ND    |
| <i>Bgn</i>      | biglycan                                                                | 623 | 12 | 0.98  | 0.70  | 636 | 8  | 1.03 | 0.74  |
| <i>Blmh</i>     | bleomycin hydrolase                                                     | 41  | 4  | 1.00  | 1.01  | 19  | 4  | 1.08 | 1.07  |
| <i>Blvrb</i>    | flavin reductase                                                        | 1   | 1  | 1.03  | 0.70  | 1   | 1  | 1.22 | 0.64  |
| <i>Bpnt1</i>    | 3'(2'),5'-bisphosphate nucleotidase 1                                   | 3   | 2  | 0.17  | 0.30  | 5   | 2  | 0.98 | 1.23  |
| <i>Brp44</i>    | brain protein 44                                                        | 4   | 2  | 1.33  | 1.35  | 3   | 1  | 1.19 | 1.32  |
| <i>Bsg</i>      | Basigin isoform 2                                                       | 2   | 1  | 0.97  | 1.13  | ND  | ND | ND   | ND    |
| <i>Bub3</i>     | mitotic checkpoint protein BUB3                                         | 1   | 1  | 1.00  | 1.05  | ND  | ND | ND   | ND    |
| <i>Bzw1</i>     | Basic leucine zipper and W2 domain-containing protein 1                 | 7   | 2  | 0.88  | 0.98  | ND  | ND | ND   | ND    |
| <i>C1qb</i>     | complement C1q subcomponent subunit B                                   | 2   | 1  | 1.18  | 0.90  | ND  | ND | ND   | ND    |
| <i>C1qbp</i>    | Complement component 1 Q subcomponent-binding protein, isoform 1        | 3   | 2  | 0.75  | 0.71  | 4   | 2  | 1.24 | 0.79  |
| <i>C1qtnf7</i>  | complement C1q tumor necrosis factor-related protein 7 isoform 1        | 2   | 1  | 1.68  | 2.13  | ND  | ND | ND   | ND    |
| <i>C1s</i>      | Complement C1s-A subcomponent                                           | 2   | 1  | 0.20  | 0.24  | ND  | ND | ND   | ND    |
| <i>C3</i>       | Complement C3                                                           | 122 | 16 | 0.96  | 0.63  | 107 | 16 | 1.03 | 0.64  |
| <i>C77080</i>   | hypothetical protein LOC97130                                           | 1   | 1  | 1.26  | 1.68  | ND  | ND | ND   | ND    |
| <i>C8a</i>      | complement component C8 alpha chain                                     | 3   | 2  | 1.65  | 1.90  | 1   | 1  | 1.65 | 0.86  |



|                 |                                                                 |     |    |      |      |     |    |      |      |
|-----------------|-----------------------------------------------------------------|-----|----|------|------|-----|----|------|------|
| <i>C8b</i>      | complement component C8 beta chain                              | 1   | 1  | 1.23 | 1.04 | 1   | 1  | 1.92 | 1.47 |
| <i>C8g</i>      | complement component C8 gamma chain                             | 3   | 1  | 1.56 | 1.01 | 4   | 1  | 1.45 | 0.93 |
| <i>Cab39l</i>   | calcium-binding protein 39-like                                 | 2   | 1  | 0.76 | 0.98 | 1   | 1  | 0.81 | 1.08 |
| <i>Cables1</i>  | CDK5 and ABL1 enzyme substrate 1 isoform 1                      | 7   | 1  | 0.96 | 0.81 | 6   | 1  | ND   | ND   |
| <i>Cadm1</i>    | cell adhesion molecule 1 isoform d                              | 1   | 1  | ND   | ND   | ND  | ND | ND   | ND   |
| <i>Cald1</i>    | caldesmon 1                                                     | 1   | 1  | 0.99 | 0.92 | ND  | ND | ND   | ND   |
| <i>Calm1</i>    | calmodulin                                                      | 53  | 3  | 0.98 | 0.68 | 60  | 4  | 0.90 | 0.75 |
| <i>Calml3</i>   | Calmodulin-like protein 3                                       | 90  | 6  | 0.87 | 0.73 | 65  | 4  | 0.93 | 0.79 |
| <i>Calr</i>     | calreticulin                                                    | 25  | 3  | 0.91 | 0.90 | 27  | 1  | 1.07 | 1.05 |
| <i>Calu</i>     | calumenin isoform 2                                             | 4   | 2  | 0.98 | 0.92 | 2   | 1  | 0.97 | 0.98 |
| <i>Camk1d</i>   | calcium/calmodulin-dependent protein kinase type 1D             | 6   | 2  | 1.10 | 1.07 | 10  | 3  | 1.07 | 1.18 |
| <i>Camk2d</i>   | calcium/calmodulin-dependent protein kinase type II subunit c4  | 4   | 2  | 1.17 | 1.21 | 3   | 2  | 1.03 | 1.10 |
| <i>Cand1</i>    | cullin-associated NEDD8-dissociated protein 1                   | 16  | 6  | 1.19 | 1.12 | 7   | 6  | 1.10 | 1.12 |
| <i>Canx</i>     | calnexin                                                        | 32  | 2  | 0.97 | 0.78 | 23  | 1  | 0.93 | 0.83 |
| <i>Cap1</i>     | Adenylyl cyclase-associated protein 1                           | 56  | 6  | 1.09 | 1.13 | 56  | 5  | 0.85 | 0.89 |
| <i>Capg</i>     | Macrophage-capping protein isoform 2                            | 210 | 6  | 0.97 | 0.93 | 194 | 7  | 0.98 | 0.99 |
| <i>Capn1</i>    | calpain-1 catalytic subunit                                     | 102 | 15 | 1.11 | 1.15 | 60  | 11 | 1.20 | 1.12 |
| <i>Capn2</i>    | Calpain-2 catalytic subunit                                     | 33  | 6  | 1.65 | 1.27 | 30  | 6  | 1.24 | 1.40 |
| <i>Capn5</i>    | calpain-5                                                       | 17  | 4  | 0.83 | 0.82 | 19  | 4  | 1.01 | 1.06 |
| <i>Capns1</i>   | Calpain small subunit 1                                         | 10  | 3  | 1.35 | 1.12 | 3   | 2  | 1.14 | 1.21 |
| <i>Caprin1</i>  | Caprin-1 isoform c                                              | 6   | 1  | 0.85 | 0.98 | 2   | 1  | 0.89 | 0.92 |
| <i>Capza2</i>   | F-actin-capping protein subunit alpha-2                         | 38  | 5  | 0.92 | 1.05 | 26  | 5  | 0.88 | 0.96 |
| <i>Capzb</i>    | F-actin-capping protein subunit beta isoform b                  | 41  | 4  | 1.24 | 1.10 | 25  | 3  | 0.99 | 1.01 |
| <i>Car3</i>     | carbonic anhydrase 3                                            | 102 | 6  | 1.03 | 0.90 | 78  | 4  | 1.02 | 1.02 |
| <i>Casp8</i>    | caspase-8                                                       | 4   | 1  | 0.93 | 0.93 | 3   | 1  | 0.83 | 0.89 |
| <i>Cast</i>     | calpastatin                                                     | 44  | 4  | 1.19 | 1.12 | 40  | 4  | 1.36 | 0.98 |
| <i>Cbfb</i>     | core-binding factor subunit beta isoform 2                      | 2   | 1  | 0.96 | 0.90 | ND  | ND | ND   | ND   |
| <i>Cbr1</i>     | Carbonyl reductase [NADPH] 1                                    | 32  | 7  | 0.92 | 0.94 | 32  | 6  | 0.99 | 0.96 |
| <i>Cbr2</i>     | carbonyl reductase [NADPH] 2                                    | 49  | 5  | 0.90 | 0.81 | 46  | 5  | 0.91 | 0.90 |
| <i>Cbr3</i>     | carbonyl reductase 3                                            | 18  | 3  | 1.14 | 0.92 | 17  | 3  | 0.72 | 0.77 |
| <i>Cbx3</i>     | Chromobox protein homolog 3                                     | 3   | 2  | 1.17 | 1.19 | ND  | ND | ND   | ND   |
| <i>Ccdc109a</i> | Coiled-coil domain-containing protein 109A                      | 1   | 1  | 0.87 | 1.02 | ND  | ND | ND   | ND   |
| <i>Ccdc6</i>    | PREDICTED: similar to coiled-coil domain containing 6 isoform 2 | 2   | 1  | 0.75 | 1.10 | ND  | ND | ND   | ND   |
| <i>Ccs</i>      | copper chaperone for superoxide dismutase                       | 6   | 1  | 1.11 | 1.08 | ND  | ND | ND   | ND   |

|                 |                                                                     |    |    |      |      |    |    |      |      |
|-----------------|---------------------------------------------------------------------|----|----|------|------|----|----|------|------|
| <i>Cct2</i>     | T-complex protein 1 subunit beta                                    | 70 | 10 | 0.94 | 1.02 | 40 | 7  | 0.95 | 0.99 |
| <i>Cct3</i>     | T-complex protein 1 subunit gamma                                   | 80 | 14 | 0.99 | 0.95 | 77 | 12 | 0.97 | 0.99 |
| <i>Cct4</i>     | T-complex protein 1 subunit delta                                   | 68 | 6  | 0.97 | 0.96 | 53 | 7  | 0.98 | 0.96 |
| <i>Cct5</i>     | T-complex protein 1 subunit epsilon                                 | 33 | 5  | 0.92 | 0.82 | 34 | 4  | 0.86 | 1.04 |
| <i>Cct6a</i>    | T-complex protein 1 subunit zeta                                    | 19 | 8  | 1.07 | 1.04 | 19 | 7  | 1.00 | 0.69 |
| <i>Cct7</i>     | T-complex protein 1 subunit eta                                     | 38 | 6  | 1.03 | 1.02 | 36 | 6  | 1.05 | 1.02 |
| <i>Cct8</i>     | T-complex protein 1 subunit theta                                   | 82 | 10 | 0.93 | 0.93 | 57 | 8  | 0.89 | 0.94 |
| <i>Cd109</i>    | CD109 antigen                                                       | 22 | 5  | 1.09 | 1.04 | 12 | 5  | 0.95 | 0.99 |
| <i>Cd2ap</i>    | CD2-associated protein                                              | 2  | 1  | 0.98 | 0.98 | ND | ND | ND   | ND   |
| <i>Cd44</i>     | CD44 antigen isoform c                                              | 48 | 3  | 1.00 | 0.87 | 28 | 2  | 0.96 | 0.91 |
| <i>Cd82</i>     | CD82 antigen isoform 2                                              | 2  | 1  | 0.81 | 0.80 | ND | ND | ND   | ND   |
| <i>Cd99</i>     | CD99 antigen                                                        | 1  | 1  | 0.95 | 1.00 | ND | ND | ND   | ND   |
| <i>Cda</i>      | cytidine deaminase                                                  | 2  | 1  | 1.01 | 1.00 | 4  | 1  | 0.99 | 0.97 |
| <i>Cdc37</i>    | hsp90 co-chaperone Cdc37                                            | 23 | 3  | 0.85 | 0.96 | 16 | 2  | 1.05 | 1.02 |
| <i>Cdc42</i>    | cell division control protein 42 homolog                            | 42 | 5  | 1.46 | 1.04 | 30 | 4  | 1.20 | 1.12 |
| <i>Cdc42ep4</i> | cdc42 effector protein 4                                            | 2  | 1  | 1.02 | 1.00 | 2  | 1  | 0.81 | 0.88 |
| <i>Cdcp1</i>    | CUB domain-containing protein 1                                     | 1  | 1  | 0.80 | 0.92 | ND | ND | ND   | ND   |
| <i>Cdh1</i>     | cadherin-1                                                          | 60 | 4  | 1.02 | 0.79 | 82 | 7  | 1.03 | 0.82 |
| <i>Cdipt</i>    | CDP-diacylglycerol--inositol 3-phosphatidyltransferase isoform 4    | 4  | 2  | 1.33 | 1.28 | 3  | 1  | 1.33 | 1.44 |
| <i>Cdk5</i>     | cell division protein kinase 5                                      | 1  | 1  | ND   | ND   | ND | ND | ND   | ND   |
| <i>Cdk7</i>     | Cell division protein kinase 7                                      | 2  | 1  | 1.18 | 2.14 | ND | ND | ND   | ND   |
| <i>Cds2</i>     | phosphatidate cytidyltransferase 2                                  | 3  | 1  | 1.69 | 1.51 | ND | ND | ND   | ND   |
| <i>Cdv3</i>     | protein CDV3 isoform c                                              | 1  | 1  | 1.00 | 1.00 | 2  | 1  | 1.01 | 0.97 |
| <i>Ceacam1</i>  | carcinoembryonic antigen-related cell adhesion molecule 1 isoform 3 | 3  | 1  | 1.12 | 0.77 | ND | ND | ND   | ND   |
| <i>Cenpv</i>    | centromere protein V                                                | 6  | 1  | 0.58 | 0.59 | 3  | 1  | ND   | ND   |
| <i>Cep290</i>   | Centrosomal protein of 290 kDa                                      | 4  | 1  | 0.75 | 0.72 | ND | ND | ND   | ND   |
| <i>Ces1c</i>    | liver carboxylesterase N                                            | 13 | 3  | 0.91 | 0.41 | ND | ND | ND   | ND   |
| <i>Ces1d</i>    | Carboxylesterase 3                                                  | 91 | 10 | 0.80 | 0.97 | 57 | 4  | 0.79 | 0.92 |
| <i>Ces2c</i>    | carboxylesterase 2                                                  | 12 | 2  | 1.27 | 1.17 | 17 | 2  | 1.14 | 1.19 |
| <i>Ces2g</i>    | hypothetical protein LOC72361                                       | 8  | 4  | 0.97 | 1.10 | 11 | 4  | 0.94 | 1.12 |
| <i>Cetn2</i>    | Centrin-2                                                           | 3  | 1  | 1.24 | 0.92 | ND | ND | ND   | ND   |
| <i>Cfb</i>      | complement factor B isoform 2                                       | 1  | 1  | 0.99 | 0.80 | ND | ND | ND   | ND   |
| <i>Cfh</i>      | Complement factor H                                                 | 15 | 5  | 1.44 | 0.98 | 17 | 5  | 1.45 | 1.04 |
| <i>Cfl2</i>     | cofilin-2                                                           | 13 | 2  | 1.01 | 1.41 | 14 | 2  | 1.03 | 0.87 |

|                |                                                                       |     |    |      |      |     |    |      |      |
|----------------|-----------------------------------------------------------------------|-----|----|------|------|-----|----|------|------|
| <i>Cgn</i>     | cingulin                                                              | 6   | 1  | 0.85 | 0.83 | 5   | 1  | 0.80 | 0.98 |
| <i>Chd4</i>    | chromodomain-helicase-DNA-binding protein 4                           | 5   | 4  | 0.89 | 0.64 | ND  | ND | ND   | ND   |
| <i>Chd5</i>    | chromodomain helicase DNA binding protein 5 isoform 2                 | 1   | 1  | 1.01 | 0.96 | ND  | ND | ND   | ND   |
| <i>Cherp</i>   | Calcium homeostasis endoplasmic reticulum protein                     | 1   | 1  | 3.51 | 2.10 | ND  | ND | ND   | ND   |
| <i>Chl1</i>    | Neural cell adhesion molecule L1-like protein                         | 7   | 2  | 0.69 | 0.75 | 6   | 2  | 1.01 | 0.92 |
| <i>Chmp2a</i>  | charged multivesicular body protein 2a                                | 10  | 1  | 0.80 | 0.96 | 7   | 2  | 0.76 | 1.00 |
| <i>Chmp2b</i>  | charged multivesicular body protein 2b                                | 5   | 1  | 1.13 | 1.08 | 1   | 1  | 1.30 | 1.15 |
| <i>Chmp4b</i>  | charged multivesicular body protein 4b                                | 16  | 2  | 0.86 | 1.09 | 13  | 2  | 0.92 | 1.22 |
| <i>Chmp5</i>   | Charged multivesicular body protein 5                                 | 1   | 1  | 0.50 | 0.49 | 2   | 1  | 0.95 | 0.72 |
| <i>Chmp6</i>   | Charged multivesicular body protein 6                                 | 3   | 1  | 1.01 | 1.13 | ND  | ND | ND   | ND   |
| <i>Chpf</i>    | chondroitin sulfate synthase 2 isoform b                              | 1   | 1  | 1.48 | 2.11 | ND  | ND | ND   | ND   |
| <i>Chst11</i>  | carbohydrate sulfotransferase 11                                      | 1   | 1  | ND   | ND   | ND  | ND | ND   | ND   |
| <i>Cirbp</i>   | cold-inducible RNA-binding protein                                    | 10  | 3  | 1.16 | 0.91 | ND  | ND | ND   | ND   |
| <i>Cisd2</i>   | CDGSH iron sulfur domain-containing protein 2                         | 1   | 1  | 0.66 | 0.88 | ND  | ND | ND   | ND   |
| <i>Cisd3</i>   | Melanoma nuclear protein 13                                           | 1   | 1  | 1.26 | 1.48 | 1   | 1  | 1.13 | 1.32 |
| <i>Ckap2l</i>  | cytoskeleton-associated protein 2-like                                | 1   | 1  | 1.33 | 1.15 | ND  | ND | ND   | ND   |
| <i>Ckap4</i>   | cytoskeleton-associated protein 4                                     | 43  | 8  | 0.94 | 0.88 | 30  | 6  | 0.90 | 0.93 |
| <i>Ckb</i>     | Brain creatine kinase                                                 | 18  | 4  | 0.84 | 0.82 | 8   | 3  | 0.96 | 1.07 |
| <i>Ckmt1</i>   | creatine kinase U-type, mitochondrial                                 | 38  | 5  | 1.06 | 1.14 | 29  | 3  | 1.35 | 1.01 |
| <i>Cldn4</i>   | claudin-4                                                             | 10  | 3  | 1.15 | 1.20 | 8   | 2  | 1.28 | 1.06 |
| <i>Cldn7</i>   | claudin 7                                                             | 30  | 1  | 1.07 | 1.26 | 33  | 1  | 1.07 | 1.12 |
| <i>Clec11a</i> | C-type lectin domain family 11 member A                               | 8   | 3  | 1.42 | 0.99 | 1   | 1  | 1.03 | 1.15 |
| <i>Clec3b</i>  | tetranectin                                                           | 2   | 1  | 0.98 | 1.05 | ND  | ND | ND   | ND   |
| <i>Clic1</i>   | Chloride intracellular channel protein 1                              | 86  | 8  | 1.06 | 1.08 | 71  | 7  | 1.05 | 1.16 |
| <i>Clic3</i>   | chloride intracellular channel protein 3                              | 12  | 2  | 1.06 | 1.00 | 16  | 4  | 1.04 | 1.02 |
| <i>Clint1</i>  | Clathrin interactor 1                                                 | 11  | 4  | 0.86 | 0.85 | ND  | ND | ND   | ND   |
| <i>Clns1a</i>  | methylosome subunit pICln                                             | 2   | 1  | 0.93 | 1.01 | ND  | ND | ND   | ND   |
| <i>Clpp</i>    | putative ATP-dependent Clp protease proteolytic subunit, mitochondria | 1   | 1  | 0.88 | 1.51 | ND  | ND | ND   | ND   |
| <i>Clptm1</i>  | Cleft lip and palate transmembrane protein 1 homolog                  | 2   | 1  | 1.58 | 1.38 | ND  | ND | ND   | ND   |
| <i>Cltc</i>    | Clathrin light chain A isoform d                                      | 13  | 3  | 1.04 | 0.95 | 8   | 1  | 1.15 | 0.97 |
| <i>Cltb</i>    | clathrin light chain B                                                | 7   | 2  | 1.03 | 1.05 | 2   | 1  | 0.96 | 1.05 |
| <i>Cltc</i>    | clathrin heavy chain 1                                                | 176 | 23 | 1.13 | 1.12 | 144 | 19 | 1.09 | 1.01 |
| <i>Cmas</i>    | N-acylneuraminate cytidyltransferase                                  | 1   | 1  | 1.00 | 1.10 | ND  | ND | ND   | ND   |
| <i>Cmpk1</i>   | UMP-CMP kinase                                                        | 5   | 2  | 1.02 | 1.12 | 6   | 1  | 0.87 | 1.10 |

|                |                                                    |      |    |      |      |      |    |      |      |
|----------------|----------------------------------------------------|------|----|------|------|------|----|------|------|
| <i>Cnbp</i>    | Cellular nucleic acid-binding protein isoform 3    | 14   | 2  | 1.58 | 1.04 | 14   | 2  | 1.47 | 1.39 |
| <i>Cndp2</i>   | cytosolic non-specific dipeptidase                 | 35   | 6  | 0.94 | 0.98 | 32   | 4  | 0.91 | 1.06 |
| <i>Cnn3</i>    | calponin-3                                         | 37   | 5  | 1.20 | 1.11 | 5    | 3  | 1.09 | 1.03 |
| <i>Cnot1</i>   | CCR4-NOT transcription complex subunit 1 isoform 2 | 1    | 1  | 1.15 | 1.28 | ND   | ND | ND   | ND   |
| <i>Cnot2</i>   | CCR4-NOT transcription complex subunit 2 isoform b | 1    | 1  | 1.12 | 1.57 | ND   | ND | ND   | ND   |
| <i>Cnot3</i>   | CCR4-NOT transcription complex subunit 3           | 3    | 1  | 0.98 | 0.99 | ND   | ND | ND   | ND   |
| <i>Cnpy2</i>   | protein canopy homolog 2                           | 16   | 2  | 0.88 | 0.97 | 12   | 2  | 0.99 | 1.05 |
| <i>Cobra1</i>  | Cofactor of BRCA1                                  | 2    | 1  | 1.04 | 1.15 | 1    | 1  | 1.01 | 0.98 |
| <i>Cog4</i>    | conserved oligomeric Golgi complex subunit 4       | 1    | 1  | 1.18 | 1.28 | ND   | ND | ND   | ND   |
| <i>Col11a1</i> | Collagen alpha-1(XI) chain                         | 20   | 2  | 1.06 | 1.04 | 11   | 1  | 1.50 | 1.25 |
| <i>Col12a1</i> | Collagen alpha-1(XII) chain                        | 3436 | 81 | 1.34 | 1.30 | 3320 | 74 | 1.31 | 1.28 |
| <i>Col14a1</i> | collagen alpha-1(XIV) chain                        | 154  | 21 | 1.28 | 1.45 | 121  | 18 | 1.18 | 1.38 |
| <i>Col17a1</i> | collagen alpha-1(XVII) chain                       | 30   | 7  | 0.92 | 0.80 | 18   | 5  | 0.81 | 0.74 |
| <i>Col18a1</i> | collagen alpha-1(XVIII) chain isoform 2            | 1    | 1  | 1.21 | 1.14 | ND   | ND | ND   | ND   |
| <i>Col1a1</i>  | collagen alpha-1(I) chain                          | 1428 | 16 | 4.45 | 2.56 | 1060 | 14 | 4.51 | 2.66 |
| <i>Col1a2</i>  | Collagen alpha-2(I) chain                          | 1272 | 19 | 4.02 | 2.39 | 961  | 16 | 4.11 | 2.41 |
| <i>Col2a1</i>  | collagen alpha-1(II) chain isoform 2               | 65   | 1  | 4.17 | 2.63 | 34   | 1  | 4.00 | 2.41 |
| <i>Col3a1</i>  | collagen alpha-1(III) chain                        | 1    | 1  | 5.06 | 3.95 | ND   | ND | ND   | ND   |
| <i>Col4a2</i>  | collagen alpha-2(IV) chain                         | 38   | 4  | 1.55 | 2.99 | 31   | 4  | 1.44 | 3.16 |
| <i>Col4a4</i>  | collagen alpha-4(IV) chain                         | 9    | 1  | 1.44 | 3.33 | 8    | 1  | 1.39 | 3.43 |
| <i>Col5a1</i>  | Collagen alpha-1(V) chain                          | 133  | 4  | 1.67 | 1.29 | 125  | 4  | 1.63 | 1.32 |
| <i>Col5a2</i>  | collagen alpha-2(V) chain                          | 36   | 2  | 1.57 | 0.84 | 46   | 2  | 1.58 | 0.91 |
| <i>Col5a3</i>  | collagen, type V, alpha 3                          | 3    | 2  | 2.48 | 1.81 | 1    | 1  | 1.39 | 1.44 |
| <i>Col6a1</i>  | collagen alpha-1(VI) chain                         | 1030 | 21 | 2.50 | 1.95 | 1000 | 16 | 2.39 | 1.89 |
| <i>Col6a2</i>  | collagen alpha-2(VI) chain                         | 579  | 15 | 2.32 | 1.85 | 593  | 14 | 2.05 | 1.72 |
| <i>Col7a1</i>  | Collagen alpha-1(VII) chain                        | 124  | 16 | 2.27 | 2.07 | 111  | 19 | 2.31 | 2.00 |
| <i>Copa</i>    | coatomer subunit alpha                             | 13   | 7  | 1.13 | 1.18 | 10   | 3  | 1.03 | 1.11 |
| <i>Copb1</i>   | Coatomer subunit beta                              | 13   | 4  | 1.02 | 0.85 | 8    | 3  | 1.01 | 0.99 |
| <i>Copb2</i>   | coatomer subunit beta'                             | 26   | 8  | 0.89 | 0.83 | 20   | 7  | 1.00 | 0.91 |
| <i>Cope</i>    | Coatomer subunit epsilon                           | 6    | 3  | 1.43 | 1.50 | ND   | ND | ND   | ND   |
| <i>Copg</i>    | coatomer subunit gamma isoform 1                   | 1    | 1  | 1.14 | 0.81 | ND   | ND | ND   | ND   |
| <i>Copg2</i>   | coatomer subunit gamma-2                           | 6    | 2  | 0.91 | 1.25 | 5    | 2  | 0.93 | 0.97 |
| <i>Cops2</i>   | COP9 signalosome complex subunit 2                 | 4    | 2  | 1.28 | 0.23 |      |    | ND   | ND   |
| <i>Cops3</i>   | COP9 signalosome complex subunit 3                 | 3    | 1  | 1.02 | 0.99 | ND   | ND | ND   | ND   |

|               |                                                           |    |   |      |      |    |    |      |      |
|---------------|-----------------------------------------------------------|----|---|------|------|----|----|------|------|
| <i>Cops4</i>  | COP9 signalosome complex subunit 4                        | 3  | 1 | 1.49 | 1.15 | 2  | 1  | 1.16 | 1.05 |
| <i>Cops5</i>  | COP9 signalosome complex subunit 5                        | 4  | 2 | 0.71 | 0.62 | ND | ND | ND   | ND   |
| <i>Cops7a</i> | COP9 signalosome complex subunit 7a isoform 1             | 2  | 1 | 1.13 | 1.18 | ND | ND | ND   | ND   |
| <i>Cops8</i>  | COP9 signalosome complex subunit 8                        | 13 | 2 | 1.08 | 0.61 | 12 | 2  | 1.01 | 1.00 |
| <i>Copz1</i>  | coatamer subunit zeta-1                                   | 7  | 2 | 1.05 | 0.94 | 3  | 1  | 0.88 | 1.02 |
| <i>Coro1b</i> | coronin-1B                                                | 11 | 4 | 1.09 | 1.27 | 11 | 2  | 0.92 | 1.14 |
| <i>Coro1c</i> | coronin-1C                                                | 58 | 5 | 1.04 | 1.22 | 40 | 4  | 1.09 | 1.19 |
| <i>Coro7</i>  | Coronin-7                                                 | 4  | 1 | 1.08 | 1.29 | 4  | 2  | 0.84 | 0.87 |
| <i>Cotl1</i>  | coactosin-like 1                                          | 52 | 5 | 1.14 | 0.99 | 31 | 4  | 1.25 | 0.85 |
| <i>COX2</i>   | Cytochrome c oxidase subunit II [Mus musculus musculus]   | 9  | 2 | 1.04 | 0.90 | 10 | 2  | 0.95 | 0.84 |
| <i>Cox4i1</i> | cytochrome c oxidase subunit 4 isoform 1, mitochondrial   | 14 | 2 | 1.03 | 0.97 | 9  | 2  | 1.08 | 0.98 |
| <i>Cox4nb</i> | COX4 neighbor                                             | 1  | 1 | 0.86 | 1.10 | ND | ND | ND   | ND   |
| <i>Cox5a</i>  | Cytochrome c oxidase subunit 5A, mitochondrial            | 17 | 2 | 1.01 | 1.15 | 19 | 2  | 0.95 | 1.08 |
| <i>Cox6b1</i> | Cytochrome c oxidase subunit 6B1                          | 9  | 1 | 1.57 | 1.17 | 6  | 1  | 1.37 | 1.16 |
| <i>Cox7b</i>  | Cytochrome c oxidase subunit 7B, mitochondrial            | 3  | 1 | 1.11 | 1.89 | 4  | 1  | 1.08 | 2.04 |
| <i>Cp</i>     | Ceruloplasmin isoform b                                   | 7  | 3 | 1.18 | 0.70 | 3  | 1  | 1.18 | 0.83 |
| <i>Cpne1</i>  | copine I                                                  | 6  | 2 | 0.92 | 0.88 | 6  | 2  | 1.02 | 1.00 |
| <i>Cpne3</i>  | copine-3                                                  | 28 | 3 | 0.96 | 0.91 | 26 | 2  | 0.98 | 0.93 |
| <i>Cpsf6</i>  | cleavage and polyadenylation specificity factor subunit 6 | 8  | 2 | 0.97 | 0.94 | 4  | 1  | 0.94 | 1.00 |
| <i>Cpxm2</i>  | inactive carboxypeptidase-like protein X2                 | 16 | 2 | 1.00 | 1.22 | 6  | 2  | 1.20 | 1.51 |
| <i>Crabp1</i> | cellular retinoic acid-binding protein 1                  | 1  | 1 | 1.38 | 1.65 | 5  | 1  | 1.09 | 1.23 |
| <i>Creb1</i>  | Cyclic AMP-responsive element-binding protein 1 isoform C | 2  | 1 | ND   | ND   | ND | ND | ND   | ND   |
| <i>Crip2</i>  | cysteine-rich protein 2                                   | 1  | 1 | 0.09 | 0.98 | ND | ND | ND   | ND   |
| <i>Crk</i>    | v-crk sarcoma virus CT10 oncogene homolog                 | 1  | 1 | 0.56 | 0.55 | 2  | 1  | 1.10 | 0.96 |
| <i>Crkl</i>   | crk-like protein                                          | 2  | 1 | ND   | ND   | 4  | 1  | 0.00 | 0.00 |
| <i>Crot</i>   | peroxisomal carnitine O-octanoyltransferase               | 9  | 4 | 0.98 | 0.93 | 8  | 3  | 0.95 | 1.03 |
| <i>Cryab</i>  | alpha-crystallin B chain                                  | 5  | 1 | 0.86 | 1.06 | 7  | 1  | 1.12 | 1.31 |
| <i>Crybb2</i> | beta-crystallin B2                                        | 2  | 1 | 0.59 | 0.57 | ND | ND | ND   | ND   |
| <i>Cryl1</i>  | lambda-crystallin homolog                                 | 2  | 1 | ND   | ND   | ND | ND | ND   | ND   |
| <i>Cs</i>     | Citrate synthase, mitochondrial                           | 47 | 3 | 1.19 | 1.09 | 44 | 4  | 1.22 | 1.22 |
| <i>Csda</i>   | DNA-binding protein A short isoform                       | 27 | 2 | 1.19 | 1.08 | 24 | 2  | 1.20 | 1.11 |
| <i>Cse1l</i>  | Exportin-2                                                | 10 | 3 | 1.09 | 1.16 | 15 | 3  | 1.04 | 1.12 |
| <i>Csk</i>    | tyrosine-protein kinase CSK                               | 3  | 2 | 1.34 | 1.11 | 5  | 2  | 0.89 | 0.95 |
| <i>Csl</i>    | citrate synthase-like protein                             | 14 | 2 | ND   | ND   | 13 | 2  | 0.00 | 0.00 |

|                      |                                                      |    |    |      |      |    |    |      |      |
|----------------------|------------------------------------------------------|----|----|------|------|----|----|------|------|
| <i>Csnk1a1</i>       | casein kinase I isoform alpha                        | 16 | 2  | 0.86 | 0.88 | 8  | 1  | 0.87 | 0.85 |
| <i>Csnk1d</i>        | casein kinase I isoform delta isoform 2              | 4  | 1  | 0.85 | 0.97 | ND | ND | ND   | ND   |
| <i>Csnk2b</i>        | casein kinase II subunit beta                        | 1  | 1  | 1.17 | 1.47 | ND | ND | ND   | ND   |
| <i>Cst3</i>          | cystatin-C                                           | 1  | 1  | 0.96 | 0.69 | ND | ND | ND   | ND   |
| <i>Cstad</i>         | CSA-conditional, T cell activation-dependent protein | 2  | 1  | ND   | ND   | 2  | 1  | 0.00 | 0.00 |
| <i>Cstb</i>          | cystatin-B                                           | 11 | 1  | 0.81 | 0.93 | 7  | 1  | 0.92 | 0.98 |
| <i>Cstf1</i>         | Cleavage stimulation factor 50 kDa subunit           | 2  | 1  | 1.18 | 0.87 | ND | ND | ND   | ND   |
| <i>Ctbp2</i>         | C-terminal-binding protein 2 isoform 2               | 4  | 2  | 1.16 | 1.11 | 3  | 2  | 1.16 | 1.19 |
| <i>Cth</i>           | cystathionine gamma-lyase                            | 2  | 1  | 0.74 | 0.73 | 2  | 1  | 0.69 | 0.86 |
| <i>Ctnna1</i>        | catenin alpha-1                                      | 71 | 9  | 0.91 | 0.89 | 44 | 7  | 0.90 | 0.88 |
| <i>Ctnna2</i>        | Catenin alpha-2 isoform 1                            | 11 | 3  | 1.02 | 0.94 | ND | ND | ND   | ND   |
| <i>Ctnnb1</i>        | beta-catenin                                         | 39 | 7  | 0.78 | 0.82 | 40 | 8  | 0.96 | 0.93 |
| <i>Ctnnd1</i>        | Catenin delta-1 isoform 1                            | 60 | 13 | 1.08 | 0.90 | ND | ND | ND   | ND   |
| <i>Ctnnd1</i>        | Catenin delta-1 isoform 3                            | 49 | 8  | 1.07 | 0.90 | ND | ND | ND   | ND   |
| <i>Ctps</i>          | CTP synthase 1                                       | 8  | 2  | 1.19 | 1.09 | 4  | 1  | 1.16 | 0.84 |
| <i>Ctsb</i>          | cathepsin B                                          | 3  | 2  | 1.27 | 1.21 | 13 | 2  | 1.34 | 1.39 |
| <i>Ctsd</i>          | cathepsin D                                          | 25 | 4  | 0.91 | 0.86 | 15 | 2  | 0.97 | 1.05 |
| <i>Ctsh</i>          | Cathepsin H                                          | 9  | 2  | 1.10 | 1.21 | 4  | 1  | 0.67 | 0.45 |
| <i>Ctsl</i>          | cathepsin L1                                         | 2  | 1  | 0.83 | 0.85 | 2  | 1  | 0.79 | 0.94 |
| <i>Cttn</i>          | src substrate cortactin                              | 17 | 4  | 0.91 | 0.91 | 14 | 2  | 0.92 | 0.88 |
| <i>Cul3</i>          | cullin-3                                             | 1  | 1  | 1.18 | 1.11 | ND | ND | ND   | ND   |
| <i>Cul4b</i>         | Cullin 4B                                            | 3  | 1  | 0.95 | 0.86 | ND | ND | ND   | ND   |
| <i>Cul5</i>          | cullin-5 isoform 2                                   | 1  | 1  | 1.72 | 1.13 | ND | ND | ND   | ND   |
| <i>Cyb5</i>          | Cytochrome b5                                        | 10 | 1  | 0.96 | 1.00 | 3  | 1  | 0.97 | 0.99 |
| <i>Cyb5r3</i>        | NADH-cytochrome b5 reductase 3                       | 35 | 4  | 0.90 | 1.00 | 39 | 4  | 0.84 | 1.15 |
| <i>Cyc1</i>          | Cytochrome c1, heme protein, mitochondrial           | 2  | 1  | 0.87 | 0.99 | 1  | 1  | 1.00 | 0.98 |
| <i>Cyfp1</i>         | Cytoplasmic FMR1-interacting protein 1 isoform a     | 9  | 3  | 1.39 | 1.35 | 3  | 2  | 1.14 | 1.15 |
| <i>Cyp2f2</i>        | Cytochrome P450 2F2                                  | 9  | 3  | 2.41 | 1.57 | 7  | 2  | 1.88 | 1.32 |
| <i>Cyp3a13</i>       | cytochrome P450 3A13                                 | 10 | 5  | 0.84 | 0.70 |    |    | ND   | ND   |
| <i>Cyth1</i>         | Cytohesin-1 isoform 2                                | 2  | 1  | 0.89 | 0.89 | ND | ND | ND   | ND   |
| <i>D10Wsu52e</i>     | hypothetical protein LOC28088                        | 4  | 2  | 0.86 | 1.00 | 2  | 1  | 1.16 | 1.24 |
| <i>D17Wsu104e</i>    | hypothetical protein LOC28106                        | 2  | 1  | 0.96 | 0.74 | ND | ND | ND   | ND   |
| <i>D1Pas1</i>        | Putative ATP-dependent RNA helicase PI10             | 34 | 8  | 0.89 | 0.79 | 29 | 8  | 0.86 | 0.93 |
| <i>D230012E17Rik</i> | PREDICTED: similar to GPI inositol-deacylase         | 3  | 1  | 1.15 | 1.03 | ND | ND | ND   | ND   |

|                |                                                                   |     |   |      |      |     |    |      |      |
|----------------|-------------------------------------------------------------------|-----|---|------|------|-----|----|------|------|
| <i>Daam1</i>   | disheveled-associated activator of morphogenesis 1                | 1   | 1 | 0.95 | 0.98 | ND  | ND | ND   | ND   |
| <i>Dad1</i>    | Dolichyl-diphosphooligosaccharide--protein glycosyltransferase 3  | 3   | 1 | 1.23 | 1.20 | 2   | 1  | 1.30 | 1.38 |
| <i>Dak</i>     | bifunctional ATP-dependent dihydroxyacetone kinase/FAD-AM         | 2   | 1 | 1.75 | 1.47 | 1   | 1  | 2.18 | 2.91 |
| <i>Dapl1</i>   | death-associated protein-like 1                                   | 4   | 1 | 1.11 | 0.56 | 7   | 1  | 0.94 | 1.03 |
| <i>Dars</i>    | aspartyl-tRNA synthetase, cytoplasmic isoform 1                   | 28  | 6 | 0.92 | 0.79 | 18  | 4  | 0.94 | 0.90 |
| <i>Dazap1</i>  | DAZ-associated protein 1 isoform a                                | 6   | 2 | 1.04 | 1.31 | 9   | 2  | 0.85 | 1.00 |
| <i>Dbnl</i>    | drebrin-like protein isoform 3                                    | 55  | 6 | 0.90 | 1.01 | 43  | 6  | 0.91 | 1.02 |
| <i>Dci</i>     | 3,2-trans-enoyl-CoA isomerase, mitochondrial                      | 6   | 2 | 0.97 | 0.99 | 5   | 2  | 0.96 | 0.69 |
| <i>Dcn</i>     | decorin                                                           | 603 | 9 | 0.99 | 0.74 | 569 | 8  | 0.96 | 0.73 |
| <i>Dcps</i>    | scavenger mRNA-decapping enzyme DcpS                              | 11  | 4 | 1.03 | 1.06 | ND  | ND | ND   | ND   |
| <i>Dctn1</i>   | Dynactin subunit 1                                                | 30  | 9 | 1.22 | 1.00 | 19  | 7  | 1.21 | 1.03 |
| <i>Dctn2</i>   | dynactin subunit 2                                                | 44  | 6 | 1.15 | 1.08 | 38  | 6  | 0.97 | 1.06 |
| <i>Dctn4</i>   | Dynactin subunit 4                                                | 9   | 2 | 0.89 | 0.77 | 7   | 3  | 0.90 | 0.81 |
| <i>Dcun1d1</i> | DCN1-like protein 1                                               | 1   | 1 | 2.29 | 1.36 | 5   | 1  | 1.01 | 1.25 |
| <i>Dcxr</i>    | L-xylulose reductase                                              | 5   | 2 | 1.36 | 1.35 | 1   | 1  | 1.12 | 1.30 |
| <i>Ddah1</i>   | n(G),N(G)-dimethylarginine dimethylaminohydrolase 1               | 2   | 1 | 0.58 | 0.72 | 3   | 1  | 1.79 | 1.25 |
| <i>Ddb1</i>    | DNA damage-binding protein 1                                      | 6   | 2 | 0.94 | 0.88 | 4   | 1  | 0.91 | 0.89 |
| <i>Ddi2</i>    | protein DDI1 homolog 2                                            | 3   | 1 | 1.06 | 0.95 | 3   | 1  | 1.14 | 1.04 |
| <i>Ddost</i>   | dolichyl-diphosphooligosaccharide--protein glycosyltransferase 20 | 20  | 4 | 0.92 | 1.03 | 6   | 3  | 0.89 | 1.02 |
| <i>Ddt</i>     | D-dopachrome decarboxylase                                        | 11  | 3 | 0.90 | 1.00 | 12  | 2  | 0.92 | 1.05 |
| <i>Ddx1</i>    | ATP-dependent RNA helicase DDX1                                   | 9   | 1 | 0.75 | 0.85 | 2   | 1  | 1.03 | 1.02 |
| <i>Ddx17</i>   | probable ATP-dependent RNA helicase DDX17 isoform 2               | 46  | 6 | 1.39 | 1.50 | ND  | ND | ND   | ND   |
| <i>Ddx17</i>   | probable ATP-dependent RNA helicase DDX17 isoform 4               | 53  | 7 | 1.34 | 1.20 | ND  | ND | ND   | ND   |
| <i>Ddx19a</i>  | ATP-dependent RNA helicase DDX19A                                 | 2   | 1 | 1.08 | 1.01 | ND  | ND | ND   | ND   |
| <i>Ddx21</i>   | nucleolar RNA helicase 2                                          | 2   | 1 | 1.12 | 1.55 | 1   | 1  | 0.92 | 0.97 |
| <i>Ddx39</i>   | ATP-dependent RNA helicase DDX39                                  | 16  | 3 | 0.83 | 0.90 | ND  | ND | ND   | ND   |
| <i>Ddx5</i>    | probable ATP-dependent RNA helicase DDX5                          | 95  | 8 | 0.96 | 0.94 | 79  | 9  | 0.93 | 0.92 |
| <i>Ddx56</i>   | probable ATP-dependent RNA helicase DDX56                         | 1   | 1 | 0.94 | 0.83 | ND  | ND | ND   | ND   |
| <i>Ddx58</i>   | Probable ATP-dependent RNA helicase DDX58                         | 1   | 1 | 0.01 | 0.66 | ND  | ND | ND   | ND   |
| <i>Ddx6</i>    | probable ATP-dependent RNA helicase DDX6                          | 5   | 2 | 1.17 | 1.12 | 3   | 1  | 0.99 | 0.91 |
| <i>Dek</i>     | protein DEK                                                       | 7   | 2 | 0.86 | 0.87 | 8   | 2  | 0.76 | 0.81 |
| <i>Denr</i>    | Density-regulated protein                                         | 2   | 1 | 0.95 | 1.03 | ND  | ND | ND   | ND   |
| <i>Dera</i>    | putative deoxyribose-phosphate aldolase                           | 4   | 2 | 1.39 | 1.04 | ND  | ND | ND   | ND   |
| <i>Dffa</i>    | DNA fragmentation factor subunit alpha isoform b                  | 3   | 1 | 1.11 | 1.08 | ND  | ND | ND   | ND   |

|                |                                                                                             |     |   |      |      |    |    |      |      |
|----------------|---------------------------------------------------------------------------------------------|-----|---|------|------|----|----|------|------|
| <i>Dhcr24</i>  | 24-Dehydrocholesterol reductase                                                             | 2   | 1 | 1.08 | 1.08 | ND | ND | ND   | ND   |
| <i>Dhrs1</i>   | dehydrogenase/reductase SDR family member 1                                                 | 7   | 4 | 1.28 | 1.11 | 1  | 1  | 1.36 | 1.17 |
| <i>Dhx15</i>   | Putative pre-mRNA-splicing factor ATP-dependent RNA helicase                                | 9   | 4 | 0.99 | 1.11 | 4  | 2  | 1.09 | 1.18 |
| <i>Dhx30</i>   | putative ATP-dependent RNA helicase DHX30                                                   | 1   | 1 | 1.01 | 1.15 | 1  | 1  | ND   | ND   |
| <i>Dhx36</i>   | probable ATP-dependent RNA helicase DHX36                                                   | 2   | 1 | 0.98 | 1.20 | ND | ND | ND   | ND   |
| <i>Dhx9</i>    | ATP-dependent RNA helicase A                                                                | 47  | 8 | 1.06 | 0.96 | 48 | 6  | 1.05 | 0.97 |
| <i>Diablo</i>  | diablo homolog, mitochondrial                                                               | 5   | 1 | 0.71 | 1.14 | 2  | 1  | 0.81 | 0.84 |
| <i>Diap1</i>   | protein diaphanous homolog 1                                                                | 4   | 2 | 1.11 | 1.15 | ND | ND | ND   | ND   |
| <i>Dip2b</i>   | disco-interacting protein 2 homolog B isoform 1                                             | 3   | 2 | 0.88 | 1.09 | ND | ND | ND   | ND   |
| <i>Dkc1</i>    | h/ACA ribonucleoprotein complex subunit 4                                                   | 2   | 1 | 1.17 | 0.02 |    |    | ND   | ND   |
| <i>Dlat</i>    | dihydrolipoyllysine-residue acetyltransferase component of pyruvate dehydrogenase complex   | 12  | 4 | 1.13 | 1.07 | 10 | 4  | 1.08 | 0.90 |
| <i>Did</i>     | dihydrolipoyl dehydrogenase, mitochondrial                                                  | 2   | 1 | 1.24 | 0.98 | ND | ND | ND   | ND   |
| <i>Dlg2</i>    | Disks large homolog 2                                                                       | 2   | 1 | 1.29 | 0.80 | ND | ND | ND   | ND   |
| <i>Dist</i>    | dihydrolipoyllysine-residue succinyltransferase component of pyruvate dehydrogenase complex | 3   | 2 | 1.07 | 0.81 | 2  | 1  | 0.90 | 0.73 |
| <i>Dnaja2</i>  | dnaJ homolog subfamily A member 2                                                           | 2   | 1 | 1.20 | 0.98 | 5  | 1  | 0.88 | 0.92 |
| <i>Dnaja4</i>  | DNAJ homolog subfamily A member 4                                                           | 3   | 1 | 0.73 | 0.87 | 1  | 1  | 0.75 | 0.75 |
| <i>Dnaja1</i>  | dnaJ homolog subfamily B member 1                                                           | 6   | 3 | 1.01 | 1.29 | 6  | 3  | 0.99 | 1.03 |
| <i>Dnaja11</i> | DNAJ homolog subfamily B member 11                                                          | 5   | 1 | 1.13 | 1.02 | 4  | 2  | 1.00 | 0.80 |
| <i>Dnaja4</i>  | dnaJ homolog subfamily B member 4                                                           | 4   | 2 | 0.98 | 0.92 | ND | ND | ND   | ND   |
| <i>Dnaja3</i>  | dnaJ homolog subfamily C member 3                                                           | 5   | 1 | 0.98 | 1.00 | 1  | 1  | 0.90 | 1.04 |
| <i>Dnaja5</i>  | dnaJ homolog subfamily C member 5                                                           | 2   | 1 | ND   | ND   | 4  | 1  | 4.05 | 3.40 |
| <i>Dnaja7</i>  | dnaJ homolog subfamily C member 7                                                           | 4   | 2 | 0.95 | 0.90 | 2  | 1  | 0.93 | 1.02 |
| <i>Dnm1l</i>   | dynamamin-1-like protein isoform b                                                          | 7   | 4 | 1.11 | 0.98 | 6  | 4  | 1.17 | 1.20 |
| <i>Dnm2</i>    | dynamamin-2                                                                                 | 19  | 5 | 0.99 | 1.02 | 20 | 6  | 1.15 | 1.22 |
| <i>Dnpep</i>   | Aspartyl aminopeptidase isoform b                                                           | 58  | 7 | 1.10 | 1.24 | 43 | 5  | 1.05 | 1.04 |
| <i>Dock1</i>   | dedicator of cytokinesis protein 1                                                          | 4   | 2 | 0.89 | 0.86 | 3  | 2  | 1.00 | 1.34 |
| <i>Dpep1</i>   | Dipeptidase 1                                                                               | 16  | 4 | 1.07 | 0.85 | 17 | 3  | 1.04 | 0.89 |
| <i>Dpf2</i>    | zinc finger protein ubi-d4                                                                  | 5   | 1 | 0.88 | 0.76 | ND | ND | ND   | ND   |
| <i>Dpm1</i>    | dolichol-phosphate mannosyltransferase                                                      | 8   | 1 | 1.02 | 1.12 | 6  | 1  | 0.77 | 1.16 |
| <i>Dpp3</i>    | dipeptidyl-peptidase 3                                                                      | 7   | 4 | 1.21 | 1.11 | 5  | 3  | 1.18 | 1.15 |
| <i>Dpt</i>     | dermatopontin                                                                               | 104 | 4 | 2.22 | 1.63 | 69 | 4  | 2.46 | 2.03 |
| <i>Dpysl2</i>  | dihydropyrimidinase-related protein 2                                                       | 20  | 4 | 1.06 | 1.11 | 10 | 4  | 0.99 | 0.93 |
| <i>Dpysl3</i>  | dihydropyrimidinase-related protein 3 isoform 1                                             | 40  | 7 | 0.97 | 1.05 | 16 | 5  | 0.95 | 1.12 |
| <i>Dr1</i>     | protein Dr1                                                                                 | 2   | 1 | 1.05 | 1.77 | ND | ND | ND   | ND   |



|                 |                                                            |     |    |      |      |     |    |      |      |
|-----------------|------------------------------------------------------------|-----|----|------|------|-----|----|------|------|
| <i>Drg1</i>     | developmentally-regulated GTP-binding protein 1            | 3   | 1  | 0.84 | 0.74 | 1   | 1  | 0.81 | 0.69 |
| <i>Dsc2</i>     | desmocollin-2                                              | 61  | 10 | 0.92 | 0.85 | 43  | 8  | 0.87 | 0.77 |
| <i>Dsc3</i>     | Desmocollin-3                                              | 22  | 4  | 0.84 | 0.74 | 23  | 5  | 0.88 | 0.75 |
| <i>Dsg1a</i>    | Desmoglein-1-alpha                                         | 123 | 16 | 0.67 | 0.96 | 108 | 13 | 0.95 | 0.91 |
| <i>Dsg1b</i>    | desmoglein-1-beta                                          | 121 | 14 | 0.95 | 1.36 | 102 | 12 | 1.26 | 1.10 |
| <i>Dsg3</i>     | Desmoglein-3                                               | 68  | 9  | 0.86 | 0.83 | 58  | 12 | 0.86 | 0.87 |
| <i>Dsp</i>      | PREDICTED: desmoplakin isoform 1                           | 837 | 62 | 0.91 | 0.90 | 713 | 50 | 0.89 | 0.89 |
| <i>Dst</i>      | Bullous pemphigoid antigen 1, isoform 5 isoform a          | 4   | 3  | 1.01 | 0.74 | 6   | 3  | 0.95 | 1.19 |
| <i>Dstn</i>     | destrin                                                    | 70  | 4  | 1.00 | 1.04 | 80  | 3  | 0.96 | 1.01 |
| <i>Dusp22</i>   | dual specificity protein phosphatase 22 isoform b          | 2   | 1  | 1.62 | 1.97 | ND  | ND | ND   | ND   |
| <i>Dut</i>      | deoxyuridine triphosphatase isoform 2                      | 2   | 1  | 1.19 | 1.24 | ND  | ND | ND   | ND   |
| <i>Dync1h1</i>  | Cytoplasmic dynein 1 heavy chain 1                         | 137 | 27 | 1.18 | 1.20 | 75  | 19 | 1.12 | 1.23 |
| <i>Dync1i2</i>  | cytoplasmic dynein 1 intermediate chain 2                  | 9   | 3  | 0.98 | 1.01 | 8   | 2  | 0.76 | 1.02 |
| <i>Dync1li1</i> | cytoplasmic dynein 1 light intermediate chain 1            | 10  | 1  | 0.90 | 0.94 | 12  | 1  | 0.86 | 0.90 |
| <i>Dync1li2</i> | cytoplasmic dynein 1 light intermediate chain 2            | 6   | 2  | 1.14 | 1.51 |     |    | ND   | ND   |
| <i>Dynll1</i>   | dynein light chain 1, cytoplasmic                          | 16  | 1  | 1.49 | 1.31 | 11  | 1  | 1.25 | 1.12 |
| <i>Dynll2</i>   | dynein light chain 2, cytoplasmic                          | 8   | 1  | 1.46 | 1.25 | 6   | 1  | 1.08 | 1.70 |
| <i>Dynlrb1</i>  | dynein light chain roadblock-type 1                        | 5   | 2  | 0.98 | 1.05 | 2   | 1  | 1.03 | 1.07 |
| <i>Ebp</i>      | 3-beta-hydroxysteroid-Delta(8),Delta(7)-isomerase          | 1   | 1  | 1.51 | 1.43 | 1   | 1  | 1.47 | 1.14 |
| <i>Ech1</i>     | delta(3,5)-Delta(2,4)-dienoyl-CoA isomerase, mitochondrial | 3   | 1  | 0.96 | 0.89 | 3   | 1  | 1.18 | 1.10 |
| <i>Echdc1</i>   | Enoyl-CoA hydratase domain-containing protein 1 isoform b  | 4   | 2  | 0.90 | 1.68 | 5   | 2  | 0.97 | 1.47 |
| <i>Echs1</i>    | enoyl-CoA hydratase, mitochondrial                         | 26  | 3  | 1.00 | 0.99 | 29  | 3  | 0.93 | 0.98 |
| <i>Eef1a1</i>   | Elongation factor 1-alpha 1                                | 104 | 7  | 0.88 | 0.95 | 71  | 5  | 0.80 | 0.94 |
| <i>Eef1b2</i>   | elongation factor 1-beta                                   | 27  | 2  | 0.85 | 0.92 | 37  | 2  | 0.89 | 0.89 |
| <i>Eef1d</i>    | elongation factor 1-delta isoform b                        | 33  | 5  | 0.88 | 0.97 | 13  | 2  | 0.90 | 1.00 |
| <i>Eef1g</i>    | Elongation factor 1-gamma                                  | 37  | 4  | 1.00 | 0.97 | 41  | 3  | 1.12 | 1.27 |
| <i>Eef2</i>     | elongation factor 2                                        | 159 | 17 | 1.08 | 1.08 | 126 | 17 | 1.12 | 1.07 |
| <i>Efemp1</i>   | EGF-containing fibulin-like extracellular matrix protein 1 | 124 | 11 | 2.16 | 1.71 | 119 | 10 | 2.55 | 2.27 |
| <i>Efhd2</i>    | EF-hand domain-containing protein D2                       | 2   | 2  | 0.84 | 0.78 | ND  | ND | ND   | ND   |
| <i>Efnb1</i>    | ephrin-B1                                                  | 2   | 1  | 1.24 | 1.07 | 2   | 1  | 1.51 | 1.36 |
| <i>Eftud2</i>   | 116 kDa U5 small nuclear ribonucleoprotein component isofo | 10  | 6  | 0.98 | 1.05 | 2   | 2  | 0.90 | 0.89 |
| <i>EG232970</i> | PREDICTED: similar to pleckstrin homology-like domain, fam | 20  | 1  | 0.93 | 1.64 | 22  | 1  | ND   | ND   |
| <i>EG382843</i> | PREDICTED: hypothetical protein                            | 4   | 1  | 1.08 | 1.17 | 10  | 1  | 1.10 | 0.97 |
| <i>EG432676</i> | PREDICTED: hypothetical protein                            | 6   | 2  | 1.74 | 1.39 | 11  | 3  | 1.59 | 1.35 |

|                 |                                                             |     |   |      |      |     |    |      |      |
|-----------------|-------------------------------------------------------------|-----|---|------|------|-----|----|------|------|
| <i>EG434373</i> | PREDICTED: similar to Nucleophosmin 1 isoform 3             | 15  | 2 | 0.84 | 0.81 | 13  | 2  | 0.84 | 0.81 |
| <i>EG547263</i> | PREDICTED: similar to MGC82151 protein                      | 11  | 1 | 0.79 | 0.89 | ND  | ND | ND   | ND   |
| <i>EG620071</i> | PREDICTED: similar to Chain C, Structure Of A Hif-1a-Pvhl-E | 10  | 1 | 1.15 | 1.09 | ND  | ND | ND   | ND   |
| <i>EG625055</i> | PREDICTED: similar to hCG2016250, isoform 3                 | 21  | 3 | 0.94 | 0.90 | 32  | 3  | 0.98 | 0.93 |
| <i>EG625193</i> | PREDICTED: hypothetical protein isoform 2                   | 2   | 1 | 0.88 | 0.88 | ND  | ND | ND   | ND   |
| <i>EG627788</i> | PREDICTED: similar to cytoplasmic dynein light chain 1      | 21  | 1 | 1.37 | 0.97 | 15  | 1  | 1.77 | 2.02 |
| <i>EG627798</i> | PREDICTED: hypothetical protein                             | 4   | 1 | 0.89 | 0.97 | 4   | 1  | 1.13 | 0.94 |
| <i>EG628040</i> | PREDICTED: similar to Golgi autoantigen, golgin subfamily a | 1   | 1 | 0.64 | 0.86 | ND  | ND | ND   | ND   |
| <i>EG629732</i> | PREDICTED: similar to ribosomal protein S8 isoform 2        | 75  | 5 | 1.10 | 1.11 | ND  | ND | ND   | ND   |
| <i>EG629739</i> | PREDICTED: hypothetical protein                             | 3   | 1 | 1.73 | 1.57 | 17  | 1  | 1.81 | 1.67 |
| <i>EG664891</i> | PREDICTED: similar to ribosomal protein S26, isoform 2      | 30  | 2 | 1.15 | 0.87 | 33  | 2  | 1.17 | 0.74 |
| <i>EG665839</i> | PREDICTED: similar to DnaJ-like protein                     | 1   | 1 | 1.37 | 1.57 | ND  | ND | ND   | ND   |
| <i>EG666634</i> | PREDICTED: hypothetical protein isoform 1                   | 164 | 2 | 0.99 | 1.12 | 133 | 2  | 0.98 | 1.06 |
| <i>EG668829</i> | PREDICTED: similar to ribosomal protein L24                 | 14  | 2 | 1.05 | 1.03 | 9   | 2  | 1.13 | 1.02 |
| <i>Egfr</i>     | epidermal growth factor receptor isoform 2                  | 11  | 3 | 0.96 | 0.74 | 8   | 3  | 0.88 | 0.76 |
| <i>Ehd1</i>     | EH domain-containing protein 1                              | 14  | 4 | 0.78 | 0.87 | 7   | 2  | 1.08 | 0.88 |
| <i>Ehd2</i>     | EH domain-containing protein 2                              | 20  | 4 | 1.11 | 1.02 | 9   | 2  | 1.11 | 0.89 |
| <i>Ehd3</i>     | EH domain-containing protein 3                              | 17  | 4 | 1.16 | 0.80 | 15  | 3  | 1.08 | 0.79 |
| <i>Ehd4</i>     | EH domain-containing protein 4                              | 6   | 2 | 1.26 | 1.04 | ND  | ND | ND   | ND   |
| <i>Eif2a</i>    | eukaryotic translation initiation factor 2A                 | 2   | 1 | 1.32 | 1.57 | ND  | ND | ND   | ND   |
| <i>Eif2b2</i>   | translation initiation factor eIF-2B subunit beta           | 3   | 1 | 1.40 | 0.69 | 2   | 1  | 1.10 | 0.90 |
| <i>Eif2s1</i>   | Eukaryotic translation initiation factor 2 subunit 1        | 32  | 6 | 0.91 | 0.98 | 18  | 5  | 0.84 | 0.80 |
| <i>Eif2s2</i>   | Eukaryotic translation initiation factor 2 subunit 2        | 12  | 3 | 0.98 | 1.14 | 11  | 4  | 1.09 | 1.17 |
| <i>Eif3a</i>    | Eukaryotic translation initiation factor 3 subunit A        | 10  | 3 | 1.58 | 1.73 | 6   | 5  | 1.01 | 1.01 |
| <i>Eif3b</i>    | eukaryotic translation initiation factor 3 subunit B        | 17  | 4 | 1.06 | 1.11 | 12  | 2  | 1.07 | 1.08 |
| <i>Eif3c</i>    | eukaryotic translation initiation factor 3 subunit C        | 13  | 6 | 0.95 | 0.95 | ND  | ND | ND   | ND   |
| <i>Eif3d</i>    | Eukaryotic translation initiation factor 3 subunit D        | 8   | 1 | 1.06 | 1.10 | 5   | 2  | 1.20 | 1.38 |
| <i>Eif3e</i>    | eukaryotic translation initiation factor 3 subunit E        | 5   | 2 | 1.18 | 1.23 | 2   | 2  | 1.19 | 1.15 |
| <i>Eif3f</i>    | eukaryotic translation initiation factor 3 subunit F        | 12  | 2 | 0.86 | 0.75 | 9   | 2  | 0.83 | 0.84 |
| <i>Eif3g</i>    | eukaryotic translation initiation factor 3 subunit G        | 5   | 2 | 0.22 | 0.29 | 7   | 1  | 1.30 | 1.05 |
| <i>Eif3h</i>    | eukaryotic translation initiation factor 3 subunit H        | 1   | 1 | 0.97 | 0.93 | ND  | ND | ND   | ND   |
| <i>Eif3i</i>    | eukaryotic translation initiation factor 3 subunit I        | 3   | 1 | 0.96 | 0.96 | ND  | ND | ND   | ND   |
| <i>Eif3j</i>    | Eukaryotic translation initiation factor 3 subunit J        | 2   | 1 | 0.81 | 0.99 | ND  | ND | ND   | ND   |
| <i>Eif3k</i>    | eukaryotic translation initiation factor 3 subunit K        | 3   | 1 | 1.34 | 1.10 | ND  | ND | ND   | ND   |

|                 |                                                                |     |    |      |      |     |    |      |      |
|-----------------|----------------------------------------------------------------|-----|----|------|------|-----|----|------|------|
| <i>Eif3l</i>    | eukaryotic translation initiation factor 3 subunit L           | 13  | 4  | 1.33 | 1.24 | 12  | 3  | 1.34 | 1.38 |
| <i>Eif3m</i>    | eukaryotic translation initiation factor 3 subunit M           | 8   | 3  | 1.29 | 1.12 | 7   | 2  | 0.82 | 1.21 |
| <i>Eif4a1</i>   | eukaryotic initiation factor 4A-I isoform 2                    | 120 | 8  | 0.94 | 0.95 | 102 | 4  | 0.91 | 0.96 |
| <i>Eif4a3</i>   | eukaryotic initiation factor 4A-III                            | 4   | 1  | 1.09 | 1.30 | 5   | 1  | 1.01 | 0.97 |
| <i>Eif4b</i>    | Eukaryotic translation initiation factor 4B                    | 4   | 2  | 1.01 | 0.95 | ND  | ND | ND   | ND   |
| <i>Eif4e</i>    | eukaryotic translation initiation factor 4E                    | 3   | 1  | 0.93 | 0.91 | 3   | 1  | 1.11 | 1.23 |
| <i>Eif4g1</i>   | eukaryotic translation initiation factor 4 gamma 1 isoform b   | 10  | 6  | 0.89 | 0.72 | 1   | 1  | 0.90 | 1.18 |
| <i>Eif4g2</i>   | Eukaryotic translation initiation factor 4 gamma 2 isoform 2   | 14  | 5  | 1.08 | 1.03 | 4   | 2  | 1.33 | 1.29 |
| <i>Eif4h</i>    | Eukaryotic translation initiation factor 4H                    | 22  | 1  | 0.97 | 0.92 | 30  | 1  | 0.98 | 0.99 |
| <i>Eif5a</i>    | eukaryotic translation initiation factor 5A-1                  | 2   | 1  | ND   | 1.46 | ND  | ND | ND   | ND   |
| <i>Eif6</i>     | eukaryotic translation initiation factor 6                     | 4   | 1  | 0.99 | 0.97 | ND  | ND | ND   | ND   |
| <i>Elavl1</i>   | ELAV-like protein 1                                            | 15  | 3  | 0.88 | 1.01 | 14  | 3  | 0.91 | 1.11 |
| <i>Elmo2</i>    | engulfment and cell motility protein 2 isoform 3               | 2   | 1  | 1.01 | 0.63 | ND  | ND | ND   | ND   |
| <i>Elmo3</i>    | engulfment and cell motility protein 3                         | 1   | 1  | 0.78 | 1.64 | ND  | ND | ND   | ND   |
| <i>Elov1</i>    | elongation of very long chain fatty acids protein 1 isoform 2  | 6   | 1  | 1.89 | 1.91 | 3   | 1  | 1.85 | 1.80 |
| <i>Elp3</i>     | elongator complex protein 3                                    | 3   | 1  | 1.14 | 0.82 | 2   | 1  | 1.09 | 1.01 |
| <i>Emilin1</i>  | EMILIN-1                                                       | 9   | 2  | 1.08 | 1.91 | 5   | 3  | 1.20 | 2.26 |
| <i>Eml2</i>     | echinoderm microtubule-associated protein-like 2 isoform 2     | 2   | 2  | 0.89 | 0.86 | 2   | 1  | 0.94 | 1.03 |
| <i>Eml3</i>     | echinoderm microtubule-associated protein-like 3               | 2   | 1  | 1.64 | 1.29 | 1   | 1  | 1.26 | 1.12 |
| <i>Endod1</i>   | Endonuclease domain-containing 1 protein                       | 8   | 2  | 0.98 | 1.02 | 4   | 2  | 1.00 | 1.17 |
| <i>Enoph1</i>   | enolase-phosphatase E1                                         | 2   | 1  | 1.31 | 1.29 | ND  | ND | ND   | ND   |
| <i>Enpp3</i>    | Ectonucleotide pyrophosphatase/phosphodiesterase family m      | 1   | 1  | 1.10 | 1.41 | ND  | ND | ND   | ND   |
| <i>Epb4.111</i> | band 4.1-like protein 1 isoform b                              | 21  | 4  | 0.87 | 1.03 | 23  | 4  | 0.87 | 0.89 |
| <i>Epb4.112</i> | Band 4.1-like protein 2                                        | 2   | 1  | 1.02 | 0.86 | 2   | 1  | 1.25 | 0.89 |
| <i>Ephx1</i>    | epoxide hydrolase 1                                            | 30  | 5  | 0.99 | 1.05 | 30  | 7  | 0.96 | 1.02 |
| <i>Ephx2</i>    | epoxide hydrolase 2                                            | 22  | 6  | 0.94 | 1.00 | 16  | 5  | 1.00 | 0.93 |
| <i>Epn1</i>     | epsin-1                                                        | 1   | 1  | 1.02 | 1.08 | ND  | ND | ND   | ND   |
| <i>Eppk1</i>    | epiplakin                                                      | 57  | 13 | 1.09 | 0.96 | 51  | 9  | 1.11 | 0.89 |
| <i>Eprs</i>     | bifunctional aminoacyl-tRNA synthetase                         | 23  | 4  | 0.91 | 0.90 | 23  | 4  | 1.05 | 0.93 |
| <i>Eps15</i>    | epidermal growth factor receptor substrate 15 isoform B        | 3   | 1  | 1.35 | 1.27 | ND  | ND | ND   | ND   |
| <i>Eps15</i>    | epidermal growth factor receptor substrate 15 isoform A        | 1   | 1  | 0.94 | 0.94 | ND  | ND | ND   | ND   |
| <i>Eps15l1</i>  | epidermal growth factor receptor substrate 15-like 1 isoform b | 2   | 1  | 1.12 | 1.06 | 3   | 1  | 2.16 | 0.62 |
| <i>Eps8l1</i>   | epidermal growth factor receptor kinase substrate 8-like prote | 8   | 2  | 0.91 | 0.78 | 4   | 2  | 0.83 | 0.87 |
| <i>Eps8l2</i>   | epidermal growth factor receptor kinase substrate 8-like prote | 39  | 4  | 1.06 | 1.08 | 40  | 5  | 1.00 | 1.06 |

|                |                                                             |     |    |      |      |     |    |      |      |
|----------------|-------------------------------------------------------------|-----|----|------|------|-----|----|------|------|
| <i>Erap1</i>   | Endoplasmic reticulum aminopeptidase 1                      | 2   | 1  | 0.84 | 0.79 | ND  | ND | ND   | ND   |
| <i>Erbp2ip</i> | protein LAP2 isoform 2                                      | 7   | 2  | 0.86 | 0.87 | 5   | 2  | 0.79 | 0.83 |
| <i>Ergic1</i>  | Endoplasmic reticulum-Golgi intermediate compartment prote  | 1   | 1  | 1.04 | 1.04 | 1   | 1  | 0.81 | 0.89 |
| <i>Erlin1</i>  | erlin-1                                                     | 5   | 2  | 1.00 | 1.05 | ND  | ND | ND   | ND   |
| <i>Erlin2</i>  | erlin-2                                                     | 16  | 3  | 0.98 | 0.99 | 11  | 3  | 0.87 | 0.96 |
| <i>Ermp1</i>   | Endoplasmic reticulum metalloproteinase 1                   | 8   | 2  | 0.95 | 1.03 | 1   | 1  | 1.13 | 1.13 |
| <i>Ero1l</i>   | ERO1-like protein alpha                                     | 1   | 1  | 1.04 | 1.20 | ND  | ND | ND   | ND   |
| <i>Erp29</i>   | endoplasmic reticulum resident protein 29                   | 17  | 3  | 0.89 | 0.86 | 17  | 4  | 0.94 | 0.89 |
| <i>Erp44</i>   | endoplasmic reticulum resident protein ERp44                | 21  | 2  | 0.82 | 0.92 | 25  | 2  | 0.96 | 1.06 |
| <i>Esd</i>     | S-formylglutathione hydrolase                               | 9   | 2  | 1.67 | 1.42 | 14  | 2  | 3.13 | 2.57 |
| <i>Esrp1</i>   | Epithelial splicing regulatory protein 1                    | 16  | 4  | 0.99 | 1.05 | 4   | 2  | 0.85 | 0.90 |
| <i>Esyt1</i>   | extended synaptotagmin-1                                    | 3   | 2  | 1.27 | 1.21 | ND  | ND | ND   | ND   |
| <i>Etf1</i>    | Eukaryotic peptide chain release factor subunit 1           | 9   | 4  | 0.93 | 0.88 | 9   | 3  | 0.99 | 0.85 |
| <i>Etfa</i>    | electron transfer flavoprotein subunit alpha, mitochondrial | 45  | 6  | 0.94 | 1.00 | 28  | 2  | 0.89 | 1.01 |
| <i>Etl4</i>    | Sickle tail protein                                         | 3   | 2  | 0.95 | 0.96 | ND  | ND | ND   | ND   |
| <i>Evpl</i>    | Envoplakin                                                  | 455 | 39 | 0.91 | 0.93 | 362 | 35 | 0.90 | 0.94 |
| <i>Ewsr1</i>   | RNA-binding protein EWS                                     | 3   | 1  | 1.98 | 2.02 | ND  | ND | ND   | ND   |
| <i>Exosc8</i>  | exosome complex exonuclease RRP43 isoform 2                 | 1   | 1  | 0.73 | 0.81 | ND  | ND | ND   | ND   |
| <i>F11r</i>    | junctional adhesion molecule A                              | 12  | 2  | 0.85 | 0.81 | 10  | 3  | 1.20 | 0.94 |
| <i>F2</i>      | coagulation factor II                                       | 2   | 1  | 1.03 | 0.81 | ND  | ND | ND   | ND   |
| <i>F3</i>      | coagulation factor III                                      | 29  | 2  | 0.91 | 0.91 | 22  | 1  | 0.76 | 0.94 |
| <i>Fabp5</i>   | fatty acid-binding protein, epidermal                       | 13  | 1  | 1.16 | 0.88 | 6   | 1  | 1.14 | 0.76 |
| <i>Fadd</i>    | protein FADD                                                | 2   | 1  | 0.44 | 1.04 | ND  | ND | ND   | ND   |
| <i>Faf2</i>    | FAS-associated factor 2                                     | 7   | 3  | 0.96 | 0.53 | 1   | 1  | 1.43 | 0.99 |
| <i>Fah</i>     | fumarylacetoacetase                                         | 5   | 3  | 0.91 | 0.90 | 3   | 2  | 0.91 | 0.92 |
| <i>Fam107b</i> | Hypothetical protein LOC66540                               | 1   | 1  | 0.88 | 1.34 | ND  | ND | ND   | ND   |
| <i>Fam120a</i> | Constitutive coactivator of PPAR-gamma-like protein 1       | 7   | 3  | 1.02 | 0.97 | 1   | 1  | 1.17 | 1.12 |
| <i>Fam129a</i> | protein Niban                                               | 5   | 3  | 0.99 | 0.83 | ND  | ND | ND   | ND   |
| <i>Fam129b</i> | niban-like protein 1                                        | 45  | 4  | 0.86 | 1.07 | 26  | 3  | 0.90 | 1.06 |
| <i>Fam162a</i> | growth and transformation-dependent protein                 | 4   | 1  | 1.15 | 1.12 | 5   | 1  | 1.00 | 1.06 |
| <i>Fam169a</i> | hypothetical protein LOC320557                              | 26  | 4  | 0.81 | 0.83 | 29  | 4  | 0.93 | 0.92 |
| <i>Fam192a</i> | NEFA-interacting nuclear protein NIP30                      | 2   | 1  | 0.95 | 1.01 | ND  | ND | ND   | ND   |
| <i>Fam40a</i>  | hypothetical protein LOC229707                              | 2   | 1  | 2.83 | 1.07 | ND  | ND | ND   | ND   |
| <i>Fam49b</i>  | hypothetical protein LOC223601                              | 8   | 2  | 1.43 | 1.32 | 5   | 2  | 0.98 | 1.01 |

|               |                                              |     |    |      |       |     |    |      |      |
|---------------|----------------------------------------------|-----|----|------|-------|-----|----|------|------|
| <i>Fam83a</i> | hypothetical protein LOC239463               | 6   | 2  | 1.09 | 1.06  | 6   | 2  | 0.98 | 0.99 |
| <i>Fam83h</i> | family with sequence similarity 83, member H | 19  | 7  | 0.96 | 0.96  | 13  | 3  | 0.84 | 0.91 |
| <i>Fam84a</i> | family with sequence similarity 84, member A | 1   | 1  | 0.90 | 1.36  | ND  | ND | ND   | ND   |
| <i>Fam92b</i> | hypothetical protein LOC436062               | 1   | 1  | 2.23 | 1.44  | ND  | ND | ND   | ND   |
| <i>Fam98a</i> | Hypothetical protein LOC72722                | 1   | 1  | 0.92 | 1.04  | ND  | ND | ND   | ND   |
| <i>Fam98b</i> | family with sequence similarity 98, member B | 4   | 2  | 1.17 | 2.04  | ND  | ND | ND   | ND   |
| <i>Fancl</i>  | Fanconi anemia, complementation group F      | 4   | 1  | 1.66 | 10.07 | 8   | 1  | 1.16 | 5.91 |
| <i>Farsa</i>  | Phenylalanyl-tRNA synthetase alpha chain     | 5   | 2  | 1.25 | 1.46  | 3   | 2  | 1.45 | 1.51 |
| <i>Farsb</i>  | phenylalanyl-tRNA synthetase beta chain      | 9   | 2  | 1.06 | 0.87  | 2   | 2  | 0.95 | 0.66 |
| <i>Fasn</i>   | fatty acid synthase                          | 60  | 15 | 1.06 | 1.03  | 53  | 11 | 0.98 | 0.99 |
| <i>Fbln1</i>  | Fibulin-1                                    | 23  | 5  | 1.34 | 1.16  | 29  | 5  | 1.35 | 1.35 |
| <i>Fbln5</i>  | fibulin-5                                    | 174 | 8  | 2.20 | 1.83  | 170 | 10 | 2.19 | 1.77 |
| <i>Fbn1</i>   | Fibrillin-1                                  | 114 | 23 | 2.91 | 2.47  | 83  | 21 | 2.45 | 2.38 |
| <i>Fdps</i>   | farnesyl pyrophosphate synthetase            | 22  | 1  | 1.12 | 0.78  | 19  | 1  | 1.16 | 0.90 |
| <i>Fech</i>   | ferrochelatase, mitochondrial                | 2   | 1  | 0.93 | 0.91  | ND  | ND | ND   | ND   |
| <i>Fen1</i>   | flap endonuclease 1                          | 7   | 3  | 0.95 | 0.87  | ND  | ND | ND   | ND   |
| <i>Fermt1</i> | Fermitin family homolog 1                    | 1   | 1  | 1.34 | 1.47  | ND  | ND | ND   | ND   |
| <i>Fga</i>    | fibrinogen, alpha polypeptide isoform 2      | 10  | 3  | 1.50 | 0.75  | 11  | 3  | 1.37 | 0.71 |
| <i>Fgb</i>    | fibrinogen beta chain                        | 6   | 2  | 1.53 | 0.88  | 8   | 3  | 1.54 | 0.78 |
| <i>Fgg</i>    | fibrinogen gamma chain                       | 10  | 1  | 1.65 | 0.68  | 5   | 2  | 1.34 | 0.81 |
| <i>Fh1</i>    | fumarate hydratase, mitochondrial            | 3   | 2  | 1.17 | 1.28  | 1   | 1  | 1.85 | 1.10 |
| <i>Fis1</i>   | mitochondrial fission 1 protein isoform 2    | 2   | 1  | 1.10 | 1.02  | ND  | ND | ND   | ND   |
| <i>Fkbp15</i> | FK506-binding protein 15                     | 2   | 1  | 1.26 | 1.64  | 4   | 1  | 0.71 | 1.02 |
| <i>Fkbp1a</i> | peptidyl-prolyl cis-trans isomerase FKBP1A   | 1   | 1  | 1.12 | 0.88  | ND  | ND | ND   | ND   |
| <i>Fkbp2</i>  | FK506-binding protein 2                      | 5   | 3  | 0.91 | 0.90  | 5   | 2  | 0.19 | 0.26 |
| <i>Fkbp3</i>  | FK506-binding protein 3                      | 7   | 2  | 0.91 | 0.82  | 4   | 1  | 1.06 | 0.99 |
| <i>Fkbp4</i>  | FK506-binding protein 4                      | 2   | 1  | 1.59 | 1.29  |     |    | ND   | ND   |
| <i>Fkbp8</i>  | FK506-binding protein 8 isoform b            | 3   | 1  | 0.98 | 0.85  | 3   | 1  | 0.80 | 0.69 |
| <i>Fkbp9</i>  | FK506 binding protein 9                      | 2   | 1  | 1.01 | 1.01  | 1   | 1  | 0.92 | 0.98 |
| <i>Flii</i>   | Protein flightless-1 homolog                 | 3   | 1  | 0.93 | 1.28  | 1   | 1  | 1.14 | 1.25 |
| <i>Flna</i>   | Filamin-A                                    | 93  | 23 | 0.93 | 0.96  | 58  | 16 | 0.98 | 0.95 |
| <i>Flnb</i>   | Filamin-B                                    | 52  | 16 | 0.92 | 1.01  | 37  | 12 | 0.87 | 0.92 |
| <i>Flot2</i>  | flotillin-2 isoform 2                        | 1   | 1  | 1.31 | 1.01  | ND  | ND | ND   | ND   |
| <i>Fmod</i>   | Fibromodulin                                 | 238 | 6  | 1.62 | 3.00  | 233 | 6  | 1.62 | 3.10 |

|                |                                                                   |     |    |      |       |     |    |      |      |
|----------------|-------------------------------------------------------------------|-----|----|------|-------|-----|----|------|------|
| <i>Fmr1</i>    | fragile X mental retardation protein 1 homolog                    | 2   | 2  | 1.21 | 1.10  | 4   | 2  | 1.07 | 1.02 |
| <i>Fn1</i>     | fibronectin 1                                                     | 165 | 23 | 1.29 | 1.39  | 167 | 19 | 1.24 | 1.39 |
| <i>Fndc3b</i>  | fibronectin type III domain-containing protein 3B                 | 1   | 1  | 1.92 | 0.94  | 1   | 1  | 1.18 | 1.05 |
| <i>Frg1</i>    | protein FRG1                                                      | 3   | 1  | 0.75 | 0.87  | 3   | 1  | 0.80 | 0.90 |
| <i>Ftsjd2</i>  | S-adenosyl-L-methionine-dependent methyltransferase FTSJ2         | 2   | 1  | 1.54 | 1.60  | ND  | ND | ND   | ND   |
| <i>Fubp1</i>   | far upstream element-binding protein 1                            | 12  | 4  | 0.97 | 1.05  | 7   | 5  | 0.99 | 0.94 |
| <i>Fubp3</i>   | far upstream element (FUSE) binding protein 3                     | 4   | 3  | 1.06 | 1.01  | ND  | ND | ND   | ND   |
| <i>Fus</i>     | RNA-binding protein FUS                                           | 10  | 2  | 0.86 | 0.96  | 6   | 2  | 3.46 | 3.14 |
| <i>Fxyd3</i>   | FXD domain-containing ion transport regulator 3                   | 2   | 1  | 0.45 | 0.59  | ND  | ND | ND   | ND   |
| <i>Fyco1</i>   | FYVE and coiled-coil domain-containing protein 1                  | 1   | 1  | ND   | ND    | ND  | ND | ND   | ND   |
| <i>G3bp1</i>   | ras GTPase-activating protein-binding protein 1                   | 18  | 2  | 0.79 | 0.71  | 38  | 3  | 0.93 | 0.88 |
| <i>G3bp2</i>   | Ras GTPase-activating protein-binding protein 2 isoform b         | 3   | 1  | 0.13 | 0.32  | 3   | 1  | 0.00 | 1.10 |
| <i>G6pdx</i>   | glucose-6-phosphate 1-dehydrogenase X                             | 61  | 8  | 0.91 | 1.04  | 60  | 7  | 0.90 | 1.03 |
| <i>Gak</i>     | cyclin G-associated kinase                                        | 1   | 1  | 0.89 | 0.86  | ND  | ND | ND   | ND   |
| <i>Gale</i>    | UDP-glucose 4-epimerase                                           | 5   | 2  | 1.22 | 1.51  | ND  | ND | ND   | ND   |
| <i>Galk2</i>   | N-acetylgalactosamine kinase                                      | 1   | 1  | 0.92 | 1.08  | ND  | ND | ND   | ND   |
| <i>Galm</i>    | galactose mutarotase                                              | 2   | 1  | 1.07 | 1.10  | ND  | ND | ND   | ND   |
| <i>Galnt12</i> | polypeptide N-acetylgalactosaminyltransferase 12                  | 2   | 1  | 0.93 | 0.93  | ND  | ND | ND   | ND   |
| <i>Galnt4</i>  | polypeptide N-acetylgalactosaminyltransferase 4                   | 1   | 1  | 0.98 | 0.97  | ND  | ND | ND   | ND   |
| <i>Galnt6</i>  | polypeptide N-acetylgalactosaminyltransferase 6                   | 1   | 1  | 4.44 | 3.02  | ND  | ND | ND   | ND   |
| <i>Galnt7</i>  | N-acetylgalactosaminyltransferase 7 isoform 1                     | 1   | 1  | 1.74 | 1.90  | 1   | 1  | 0.80 | 1.63 |
| <i>Ganab</i>   | neutral alpha-glucosidase AB                                      | 31  | 7  | 1.13 | 1.30  | 24  | 5  | 1.22 | 1.24 |
| <i>Ganc</i>    | Neutral alpha-glucosidase C                                       | 2   | 1  | 0.83 | 0.83  | ND  | ND | ND   | ND   |
| <i>Gap43</i>   | neuromodulin                                                      | 2   | 1  | 0.88 | 20.98 | ND  | ND | ND   | ND   |
| <i>Gars</i>    | glycyl-tRNA synthetase                                            | 2   | 1  | 0.93 | 1.04  | 6   | 2  | 1.06 | 1.00 |
| <i>Gart</i>    | trifunctional purine biosynthetic protein adenosine-3             | 1   | 1  | 0.89 | 1.01  | 1   | 1  | 1.54 | 1.37 |
| <i>Gbe1</i>    | 1,4-alpha-glucan-branching enzyme                                 | 3   | 1  | 1.07 | 1.15  | 3   | 1  | 1.03 | 1.20 |
| <i>Gcat</i>    | 2-amino-3-ketobutyrate coenzyme A ligase, mitochondrial isoform 4 | 4   | 2  | 1.12 | 1.00  | 4   | 2  | 1.04 | 0.96 |
| <i>Gclc</i>    | glutamate--cysteine ligase catalytic subunit                      | 7   | 3  | 1.02 | 1.13  | 2   | 1  | 1.16 | 1.19 |
| <i>Gcsh</i>    | Glycine cleavage system H protein, mitochondrial                  | 2   | 1  | 0.97 | 0.06  | 3   | 1  | 1.18 | 1.12 |
| <i>Gda</i>     | guanine deaminase                                                 | 5   | 3  | 0.86 | 0.98  | 10  | 4  | 0.88 | 0.91 |
| <i>Gdi1</i>    | rab GDP dissociation inhibitor alpha                              | 64  | 9  | 0.93 | 1.23  | 68  | 9  | 0.94 | 1.12 |
| <i>Gdi2</i>    | Rab GDP dissociation inhibitor beta                               | 120 | 13 | 0.99 | 1.00  | 134 | 11 | 0.98 | 1.03 |
| <i>Get4</i>    | conserved edge expressed protein isoform 2                        | 2   | 1  | 1.38 | 0.88  | ND  | ND | ND   | ND   |

|                |                                                              |     |   |       |       |    |    |      |      |
|----------------|--------------------------------------------------------------|-----|---|-------|-------|----|----|------|------|
| <i>Gfpt1</i>   | glucosamine-fructose-6-phosphate aminotransferase [isomer    | 13  | 5 | 1.12  | 1.00  | 10 | 5  | 1.19 | 1.21 |
| <i>Gipc1</i>   | PDZ domain-containing protein GIPC1                          | 2   | 1 | 1.20  | 1.20  | ND | ND | ND   | ND   |
| <i>Gja1</i>    | gap junction alpha-1 protein                                 | 2   | 1 | 1.02  | 0.10  | ND | ND | ND   | ND   |
| <i>Glg1</i>    | golgi apparatus protein 1                                    | 1   | 1 | 1.51  | 1.22  | ND | ND | ND   | ND   |
| <i>Glo1</i>    | Lactoylglutathione lyase                                     | 13  | 2 | 0.86  | 0.78  | 10 | 2  | 0.88 | 0.94 |
| <i>Glod4</i>   | glyoxalase domain-containing protein 4                       | 8   | 4 | 0.98  | 1.00  | 5  | 2  | 0.87 | 1.03 |
| <i>Glrx3</i>   | glutaredoxin-3                                               | 17  | 4 | 0.93  | 0.93  | 9  | 2  | 0.96 | 0.49 |
| <i>Glrx5</i>   | glutaredoxin-related protein 5                               | 3   | 1 | 1.16  | 0.68  | 5  | 2  | 1.33 | 0.87 |
| <i>Glt25d2</i> | procollagen galactosyltransferase 2                          | 1   | 1 | 1.15  | 1.07  | ND | ND | ND   | ND   |
| <i>Gltp</i>    | glycolipid transfer protein                                  | 1   | 1 | 0.86  | 0.91  | ND | ND | ND   | ND   |
| <i>Glud1</i>   | glutamate dehydrogenase 1, mitochondrial                     | 43  | 5 | 1.07  | 0.98  | 26 | 5  | 1.11 | 1.14 |
| <i>Glul</i>    | glutamine synthetase                                         | 37  | 5 | 1.19  | 1.39  | 29 | 4  | 1.15 | 1.22 |
| <i>Glyr1</i>   | Putative oxidoreductase GLYR1 isoform 2                      | 2   | 2 | 1.24  | 1.24  | ND | ND | ND   | ND   |
| <i>Gm10063</i> | PREDICTED: hypothetical protein                              | 5   | 2 | 1.07  | 1.00  | ND | ND | ND   | ND   |
| <i>Gm10071</i> | PREDICTED: hypothetical protein                              | 102 | 6 | 0.95  | 1.00  | 99 | 6  | 0.93 | 0.98 |
| <i>Gm10119</i> | PREDICTED: similar to ribosomal protein S3a                  | 44  | 4 | 0.92  | 0.92  | 35 | 5  | 0.87 | 0.84 |
| <i>Gm10131</i> | PREDICTED: similar to human protein homologous to DROE       | 8   | 1 | 2.76  | 2.76  | 7  | 2  | 2.52 | 2.00 |
| <i>Gm10221</i> | PREDICTED: hypothetical protein                              | 4   | 1 | 1.08  | 1.05  | 15 | 2  | 1.07 | 1.12 |
| <i>Gm10349</i> | PREDICTED: hypothetical protein                              | 3   | 1 | 1.35  | 1.28  | 1  | 1  | 1.20 | 1.17 |
| <i>Gm106</i>   | RPE-spondin                                                  | 3   | 1 | 2.14  | 2.30  | ND | ND | ND   | ND   |
| <i>Gm11575</i> | PREDICTED: similar to SEC61 gamma                            | 1   | 1 | 1.87  | 1.58  | 1  | 1  | 2.44 | 2.14 |
| <i>Gm12657</i> | Predicted gene 12657                                         | 28  | 3 | 1.12  | 1.25  | 14 | 1  | 1.15 | 1.21 |
| <i>Gm13072</i> | PREDICTED: hypothetical protein                              | 3   | 1 | 1.32  | 1.14  | 3  | 1  | 1.12 | 1.22 |
| <i>Gm13981</i> | PREDICTED: similar to ribosomal protein L27a-like            | 4   | 2 | ND    | ND    | ND | ND | ND   | ND   |
| <i>Gm14173</i> | PREDICTED: similar to ribosomal protein L37a                 | 14  | 1 | 1.15  | 1.54  | 9  | 1  | 1.07 | 1.55 |
| <i>Gm14277</i> | PREDICTED: similar to small nuclear riboprotein Sm-D isoform | 3   | 1 | 1.35  | 1.10  | 3  | 1  | 1.39 | 1.47 |
| <i>Gm15453</i> | PREDICTED: hypothetical protein                              | 1   | 1 | 1.00  | 1.07  | ND | ND | ND   | ND   |
| <i>Gm15501</i> | PREDICTED: similar to ribosomal protein S8 isoform 1         | 107 | 6 | 1.07  | 1.00  | 78 | 5  | 1.07 | 1.03 |
| <i>Gm2000</i>  | PREDICTED: similar to ribosomal protein L35                  | 1   | 1 | 1.05  | 1.23  | ND | ND | ND   | ND   |
| <i>Gm2a</i>    | ganglioside GM2 activator                                    | 2   | 1 | 1.60  | 0.96  |    |    | ND   | ND   |
| <i>Gm3902</i>  | PREDICTED: hypothetical protein                              | 1   | 1 | 0.78  | 0.91  | ND | ND | ND   | ND   |
| <i>Gm3940</i>  | PREDICTED: similar to ribosomal protein L23a                 | 37  | 2 | 0.98  | 1.00  | 23 | 2  | 0.93 | 0.99 |
| <i>Gm4459</i>  | PREDICTED: hypothetical protein                              | 2   | 1 | 10.67 | 16.67 | ND | ND | ND   | ND   |
| <i>Gm462</i>   | PREDICTED: hypothetical protein                              | 1   | 1 | ND    | ND    | ND | ND | ND   | ND   |

|               |                                                                 |     |   |       |       |     |    |       |       |
|---------------|-----------------------------------------------------------------|-----|---|-------|-------|-----|----|-------|-------|
| <i>Gm4987</i> | Hypothetical protein LOC245405                                  | 2   | 1 | 1.05  | 0.91  | ND  | ND | ND    | ND    |
| <i>Gm5292</i> | PREDICTED: similar to ribosomal protein L15                     | 10  | 2 | 1.23  | 1.06  | 4   | 2  | 1.20  | 1.11  |
| <i>Gm5409</i> | Try10-like trypsinogen                                          | 3   | 1 | 1.16  | 1.44  | 1   | 1  | 1.28  | 1.50  |
| <i>Gm5621</i> | PREDICTED: similar to QM protein isoform 2                      | 5   | 2 | 1.64  | 1.81  | ND  | ND | ND    | ND    |
| <i>Gm5745</i> | PREDICTED: hypothetical protein                                 | 29  | 3 | 1.29  | 1.11  | 30  | 3  | 1.31  | 1.12  |
| <i>Gm5771</i> | trypsinogen 12                                                  | 1   | 1 | ND    | ND    | ND  | ND | ND    | ND    |
| <i>Gm5908</i> | PREDICTED: hypothetical protein                                 | 26  | 3 | 0.92  | 1.00  | 34  | 2  | 0.89  | 1.03  |
| <i>Gm5963</i> | PREDICTED: hypothetical protein                                 | 16  | 1 | 1.15  | 1.03  | ND  | ND | ND    | ND    |
| <i>Gm6136</i> | PREDICTED: similar to ribosomal protein L6                      | 119 | 6 | 1.01  | 0.95  | 104 | 5  | 1.02  | 0.98  |
| <i>Gm6265</i> | PREDICTED: hypothetical protein                                 | 4   | 1 | 1.16  | 1.06  | ND  | ND | ND    | ND    |
| <i>Gm6314</i> | PREDICTED: similar to 3110003A17Rik protein                     | 3   | 1 | ND    | ND    | ND  | ND | ND    | ND    |
| <i>Gm6570</i> | PREDICTED: similar to ribosomal protein L30                     | 59  | 2 | 1.43  | 1.04  | 48  | 2  | 1.42  | 1.01  |
| <i>Gm6901</i> | PREDICTED: similar to Chromobox homolog 3 (HP1 gamma            | 6   | 1 | 1.06  | 1.15  | ND  | ND | ND    | ND    |
| <i>Gm6988</i> | PREDICTED: similar to hCG1640785                                | 15  | 2 | 0.86  | 0.96  | 11  |    | ND    | ND    |
| <i>Gm8186</i> | PREDICTED: similar to Sm protein G                              | 4   | 1 | 0.99  | 0.86  | 7   | 1  | 1.14  | 0.99  |
| <i>Gm9386</i> | PREDICTED: hypothetical protein                                 | 3   | 1 | ND    | ND    | 1   | 1  | 0.00  | 0.00  |
| <i>Gm9769</i> | PREDICTED: similar to Sid3177p                                  | 1   | 1 | 19.31 | 16.23 | 3   | 1  | 13.34 | 11.57 |
| <i>Gmfb</i>   | glia maturation factor beta                                     | 2   | 1 | 0.94  | 1.05  | 3   | 1  | 0.95  | 1.05  |
| <i>Gmppa</i>  | mannose-1-phosphate guanyltransferase alpha                     | 1   | 1 | 1.21  | 1.17  | ND  | ND | ND    | ND    |
| <i>Gmppb</i>  | mannose-1-phosphate guanyltransferase beta                      | 4   | 1 | 1.13  | 1.01  | 1   | 1  | 1.30  | 1.14  |
| <i>Gmps</i>   | GMP synthase                                                    | 4   | 2 | 0.99  | 1.01  | 2   | 1  | 0.93  | 0.91  |
| <i>Gna11</i>  | guanine nucleotide-binding protein subunit alpha-11             | 6   | 2 | 0.86  | 0.89  | 4   | 1  | 0.96  | 1.05  |
| <i>Gna13</i>  | guanine nucleotide-binding protein subunit alpha-13             | 9   | 3 | 0.86  | 0.87  | 4   | 3  | 0.95  | 0.94  |
| <i>Gnai2</i>  | guanine nucleotide-binding protein G(i) subunit alpha-2         | 43  | 6 | 0.95  | 0.90  | 48  | 6  | 0.98  | 1.02  |
| <i>Gnai3</i>  | guanine nucleotide-binding protein G(k) subunit alpha           | 6   | 2 | 0.97  | 0.87  | 7   | 2  | 0.93  | 0.92  |
| <i>Gnas</i>   | Protein ALEX XXLb1                                              | 4   | 1 | 0.11  | 0.32  | 7   | 1  | 0.11  | 0.29  |
| <i>Gnas</i>   | Protein ALEX isoform g                                          | 9   | 3 | 1.29  | 1.07  | 10  | 3  | 1.14  | 1.03  |
| <i>Gnb1</i>   | guanine nucleotide-binding protein G(l)/G(s)/G(t) subunit beta  | 28  | 2 | 1.45  | 1.15  | 19  | 2  | 1.14  | 1.20  |
| <i>Gnb2</i>   | Guanine nucleotide-binding protein G(l)/G(s)/G(t) subunit beta  | 34  | 3 | 1.30  | 1.14  | 20  | 2  | 1.26  | 1.34  |
| <i>Gnb2l1</i> | guanine nucleotide-binding protein subunit beta-2-like 1        | 51  | 6 | 0.92  | 0.81  | 55  | 5  | 0.93  | 0.84  |
| <i>Gng12</i>  | Guanine nucleotide-binding protein G(l)/G(s)/G(o) subunit gamma | 2   | 2 | 1.15  | 1.18  | 2   | 1  | 1.41  | 1.12  |
| <i>Gng2</i>   | guanine nucleotide-binding protein G(l)/G(s)/G(o) subunit gamma | 2   | 1 | 1.37  | 1.38  | ND  | ND | ND    | ND    |
| <i>Gns</i>    | N-acetylglucosamine-6-sulfatase                                 | 3   | 2 | 1.00  | 1.00  | 7   | 4  | 1.01  | 1.04  |
| <i>Golga4</i> | golgin subfamily A member 4                                     | 4   | 2 | 1.08  | 1.16  | ND  | ND | ND    | ND    |



|                |                                                                      |     |    |      |      |     |    |      |      |
|----------------|----------------------------------------------------------------------|-----|----|------|------|-----|----|------|------|
| <i>Gorasp2</i> | golgi reassembly-stacking protein 2                                  | 5   | 2  | 1.34 | 1.21 | ND  | ND | ND   | ND   |
| <i>Got1</i>    | Aspartate aminotransferase, cytoplasmic                              | 2   | 1  | 1.02 | 1.11 | ND  | ND | ND   | ND   |
| <i>Got2</i>    | aspartate aminotransferase, mitochondrial                            | 46  | 5  | 0.93 | 0.61 | 39  | 4  | 0.92 | 0.65 |
| <i>Gpd1l</i>   | glycerol-3-phosphate dehydrogenase 1-like protein                    | 12  | 4  | 1.24 | 1.31 | 5   | 3  | 1.00 | 1.17 |
| <i>Gpd2</i>    | glycerol-3-phosphate dehydrogenase, mitochondrial                    | 14  | 6  | 1.04 | 0.99 | 15  | 4  | 1.09 | 1.17 |
| <i>Gphn</i>    | gephyrin isoform 2                                                   | 4   | 2  | 0.71 | 1.06 | 1   | 1  | 0.17 | 0.23 |
| <i>Gpi1</i>    | glucose-6-phosphate isomerase                                        | 14  | 6  | 1.00 | 1.05 | 8   | 3  | 0.86 | 0.83 |
| <i>Gpkow</i>   | G patch domain and KOW motifs-containing protein                     | 1   | 1  | 1.02 | 1.04 | ND  | ND | ND   | ND   |
| <i>Gpn1</i>    | GPN-loop GTPase 1                                                    | 1   | 1  | 1.13 | 1.18 |     |    | ND   | ND   |
| <i>Gprc5a</i>  | retinoic acid-induced protein 3                                      | 3   | 1  | 0.99 | 0.97 | 2   | 1  | 1.15 | 1.17 |
| <i>Gps1</i>    | COP9 signalosome complex subunit 1                                   | 2   | 1  | 1.65 | 1.68 | ND  | ND | ND   | ND   |
| <i>Gpt</i>     | alanine aminotransferase 1                                           | 48  | 11 | 1.27 | 1.33 | 35  | 7  | 1.07 | 1.25 |
| <i>Gpx1</i>    | glutathione peroxidase 1                                             | 21  | 3  | 1.24 | 1.01 | 21  | 3  | 1.03 | 1.01 |
| <i>Gpx3</i>    | Glutathione peroxidase 3 isoform 2                                   | 13  | 2  | 1.07 | 0.97 | 8   | 2  | 1.04 | 0.82 |
| <i>Gpx4</i>    | phospholipid hydroperoxide glutathione peroxidase, nuclear isoform 2 | 2   | 1  | 1.08 | 0.91 | 3   | 2  | 1.19 | 1.09 |
| <i>Grb7</i>    | growth factor receptor-bound protein 7                               | 4   | 1  | 0.83 | 0.90 | ND  | ND | ND   | ND   |
| <i>Grhpr</i>   | glyoxylate reductase/hydroxypyruvate reductase                       | 14  | 3  | 0.92 | 1.06 | 9   | 2  | 0.83 | 1.01 |
| <i>Grm4</i>    | metabotropic glutamate receptor 4                                    | 2   | 1  | 0.90 | 1.01 | ND  | ND | ND   | ND   |
| <i>Grpel1</i>  | GrpE protein homolog 1, mitochondrial                                | 2   | 1  | 1.06 | 0.92 | ND  | ND | ND   | ND   |
| <i>Gsn</i>     | gelsolin                                                             | 88  | 8  | 0.99 | 0.90 | 56  | 6  | 0.91 | 0.95 |
| <i>Gspt1</i>   | eukaryotic peptide chain release factor GTP-binding subunit E1       | 1   | 1  | 1.05 | 1.12 | ND  | ND | ND   | ND   |
| <i>Gspt2</i>   | eukaryotic peptide chain release factor GTP-binding subunit E2       | 2   | 1  | 1.10 | 1.15 | ND  | ND | ND   | ND   |
| <i>Gsr</i>     | Glutathione reductase, mitochondrial                                 | 6   | 2  | 0.97 | 0.96 | ND  | ND | ND   | ND   |
| <i>Gss</i>     | glutathione synthetase                                               | 18  | 3  | 1.19 | 0.96 | 13  | 3  | 0.82 | 0.83 |
| <i>Gsta3</i>   | glutathione S-transferase A3                                         | 27  | 5  | 0.88 | 0.97 | 15  | 3  | 0.94 | 1.03 |
| <i>Gsta4</i>   | Glutathione S-transferase A4                                         | 172 | 7  | 0.87 | 1.01 | 111 | 7  | 0.89 | 1.00 |
| <i>Gstk1</i>   | glutathione S-transferase kappa 1                                    | 1   | 1  | 5.03 | 2.93 | ND  | ND | ND   | ND   |
| <i>Gstm1</i>   | glutathione S-transferase Mu 1                                       | 63  | 6  | 1.14 | 1.13 | 37  | 5  | 1.11 | 0.97 |
| <i>Gstm2</i>   | glutathione S-transferase Mu 2                                       | 31  | 4  | 1.02 | 1.14 | 19  | 3  | 1.33 | 1.37 |
| <i>Gstm5</i>   | glutathione S-transferase Mu 5                                       | 9   | 3  | 1.35 | 1.25 | 7   | 3  | 1.30 | 1.19 |
| <i>Gsto1</i>   | glutathione S-transferase omega-1                                    | 423 | 9  | 0.88 | 0.93 | 377 | 7  | 0.92 | 0.96 |
| <i>Gstp1</i>   | Glutathione S-transferase P 1                                        | 47  | 3  | 1.03 | 0.95 | 63  | 4  | 1.03 | 0.98 |
| <i>Gstt2</i>   | Glutathione S-transferase theta-2                                    | 2   | 1  | 1.03 | 1.11 | ND  | ND | ND   | ND   |
| <i>Gstt3</i>   | glutathione S-transferase, theta 3                                   | 7   | 2  | 1.14 | 1.14 | 7   | 2  | 1.16 | 1.08 |

|                 |                                                             |     |    |       |      |     |    |      |      |
|-----------------|-------------------------------------------------------------|-----|----|-------|------|-----|----|------|------|
| <i>Gtf2a1</i>   | transcription initiation factor IIA subunit 1 isoform 1     | 1   | 1  | 0.97  | 0.94 | ND  | ND | ND   | ND   |
| <i>Gtf2f1</i>   | general transcription factor IIF subunit 1                  | 3   | 1  | 1.02  | 1.03 | ND  | ND | ND   | ND   |
| <i>Gtf2f2</i>   | general transcription factor IIF subunit 2                  | 1   | 1  | 0.91  | 0.89 | 1   | 1  | 0.89 | 0.92 |
| <i>Gtf3c3</i>   | general transcription factor IIIC, polypeptide 3            | 2   | 1  | 26.23 | 0.62 | ND  | ND | ND   | ND   |
| <i>Gtl3</i>     | gene trap locus 3                                           | 2   | 1  | 1.08  | 1.19 | ND  | ND | ND   | ND   |
| <i>Gtpbp1</i>   | GTP-binding protein 1                                       | 1   | 1  | 1.19  | 1.04 | ND  | ND | ND   | ND   |
| <i>Gyg</i>      | glycogenin-1                                                | 59  | 4  | 0.87  | 0.96 | 65  | 3  | 0.88 | 1.00 |
| <i>Gyk</i>      | glycerol kinase isoform 1                                   | 5   | 2  | 1.19  | 0.99 | 8   | 3  | 1.16 | 1.08 |
| <i>H1f0</i>     | histone H1.0                                                | 11  | 1  | 0.99  | 0.85 | 19  | 1  | 0.92 | 0.83 |
| <i>H2afx</i>    | histone H2A.x                                               | 164 | 2  | 1.22  | 1.07 | 130 | 2  | 1.01 | 0.63 |
| <i>H2afy</i>    | core histone macro-H2A.1 isoform 1                          | 39  | 5  | 0.92  | 0.98 | 22  | 4  | 0.98 | 0.69 |
| <i>H2afy2</i>   | core histone macro-H2A.2                                    | 28  | 3  | 1.01  | 0.95 | 17  | 3  | 1.00 | 1.04 |
| <i>H2-Q10</i>   | H-2 class I histocompatibility antigen, Q10 alpha chain     | 3   | 1  | 0.92  | 0.85 | ND  | ND | ND   | ND   |
| <i>Hadh</i>     | Hydroxyacyl-coenzyme A dehydrogenase, mitochondrial         | 18  | 4  | 1.01  | 1.08 | 12  | 2  | 0.87 | 0.89 |
| <i>Hadha</i>    | trifunctional enzyme subunit alpha, mitochondrial           | 31  | 10 | 1.05  | 0.93 | 20  | 6  | 1.09 | 1.10 |
| <i>Hadhb</i>    | trifunctional enzyme subunit beta, mitochondrial            | 11  | 3  | 0.87  | 1.07 | 4   | 2  | 0.91 | 0.95 |
| <i>Has1</i>     | hyaluronan synthase 1                                       | 3   | 1  | ND    | ND   | 1   | 1  | 0.00 | 0.00 |
| <i>Hat1</i>     | histone acetyltransferase type B catalytic subunit          | 2   | 1  | 1.01  | 1.09 | 1   | 1  | 1.06 | 1.01 |
| <i>Hbb-b1</i>   | hemoglobin subunit beta-1                                   | 6   | 1  | 0.84  | 1.23 | 8   | 2  | 0.90 | 1.23 |
| <i>Hc</i>       | complement C5                                               | 2   | 1  | 0.20  | 1.36 | ND  | ND | ND   | ND   |
| <i>Hck</i>      | tyrosine-protein kinase HCK isoform p56Hck                  | 3   | 2  | 0.94  | 1.03 | ND  | ND | ND   | ND   |
| <i>Hdgf</i>     | hepatoma-derived growth factor                              | 9   | 3  | 0.78  | 0.94 | 6   | 2  | 0.89 | 1.02 |
| <i>Hdgfrp3</i>  | hepatoma-derived growth factor-related protein 3            | 5   | 1  | 0.92  | 0.92 | ND  | ND | ND   | ND   |
| <i>Hdhd2</i>    | haloacid dehalogenase-like hydrolase domain-containing prot | 2   | 1  | 0.84  | 1.09 | 1   | 1  | 0.79 | 1.08 |
| <i>Hdlbp</i>    | vigilin                                                     | 3   | 2  | 0.66  | 0.76 | 8   | 3  | 1.00 | 0.89 |
| <i>Hebp2</i>    | heme-binding protein 2                                      | 5   | 2  | 1.02  | 1.24 | 3   | 1  | 0.88 | 1.10 |
| <i>Herc4</i>    | probable E3 ubiquitin-protein ligase HERC4                  | 1   | 1  | 1.21  | 1.04 | ND  | ND | ND   | ND   |
| <i>Hibadh</i>   | 3-hydroxyisobutyrate dehydrogenase                          | 3   | 1  | 1.17  | 1.02 | 4   | 2  | 1.18 | 0.91 |
| <i>Hint1</i>    | histidine triad nucleotide-binding protein 1                | 3   | 2  | 1.13  | 1.05 | 1   | 1  | 1.10 | 1.09 |
| <i>Hint2</i>    | Histidine triad nucleotide-binding protein 2, mitochondrial | 3   | 1  | 1.10  | 0.98 | ND  | ND | ND   | ND   |
| <i>Hip1r</i>    | huntingtin-interacting protein 1-related protein            | 2   | 1  | 1.15  | 0.87 | ND  | ND | ND   | ND   |
| <i>Hist1h1a</i> | histone H1.1                                                | 5   | 2  | 1.15  | 1.16 | ND  | ND | ND   | ND   |
| <i>Hist1h1b</i> | histone H1.5                                                | 15  | 1  | 0.99  | 1.06 | 12  | 1  | 0.99 | 1.12 |
| <i>Hist1h1c</i> | histone H1.2                                                | 33  | 3  | 1.02  | 1.03 | 23  | 2  | 0.97 | 1.05 |

|                  |                                                                    |     |    |      |      |     |    |      |      |
|------------------|--------------------------------------------------------------------|-----|----|------|------|-----|----|------|------|
| <i>Hist1h1e</i>  | Histone H1.4                                                       | 46  | 3  | 0.94 | 1.08 | 32  | 2  | 0.90 | 1.06 |
| <i>Hist1h2ah</i> | histone H2A type 1-H                                               | 445 | 2  | 0.94 | 0.95 | 398 | 2  | 0.99 | 1.00 |
| <i>Hk1</i>       | hexokinase-1 isoform HK1                                           | 9   | 3  | 1.01 | 0.91 | 5   | 3  | 1.05 | 0.87 |
| <i>Hkdc1</i>     | putative hexokinase HKDC1                                          | 2   | 1  | ND   | ND   | 1   | 1  | 0.00 | 0.00 |
| <i>Hmgb3</i>     | high mobility group protein B3                                     | 1   | 1  | 0.97 | 0.88 | ND  | ND | ND   | ND   |
| <i>Hmha1</i>     | minor histocompatibility protein HA-1 isoform 2                    | 1   | 1  | 1.16 | 1.27 | ND  | ND | ND   | ND   |
| <i>Hn1l</i>      | hematological and neurological expressed 1-like protein            | 2   | 1  | 1.37 | 1.24 | 3   | 1  | 1.16 | 1.10 |
| <i>Hnrnpa0</i>   | heterogeneous nuclear ribonucleoprotein A0                         | 20  | 1  | 0.94 | 0.90 | 14  | 1  | 0.91 | 0.84 |
| <i>Hnrnpa1</i>   | heterogeneous nuclear ribonucleoprotein A1 isoform a               | 46  | 3  | 0.76 | 0.67 | 43  | 2  | 0.79 | 0.68 |
| <i>Hnrnpa2b1</i> | Heterogeneous nuclear ribonucleoproteins A2/B1 isoform 1           | 143 | 8  | 0.90 | 0.88 | 103 | 6  | 0.78 | 0.91 |
| <i>Hnrnpa2b1</i> | heterogeneous nuclear ribonucleoproteins A2/B1 isoform 2           | 136 | 8  | ND   | ND   | ND  | ND | ND   | ND   |
| <i>Hnrnpab</i>   | heterogeneous nuclear ribonucleoprotein A/B isoform 2              | 60  | 6  | 0.86 | 0.93 | 60  | 6  | 0.89 | 0.89 |
| <i>Hnrnpc</i>    | heterogeneous nuclear ribonucleoproteins C1/C2 isoform 4           | 12  | 4  | 0.91 | 0.76 | ND  | ND | ND   | ND   |
| <i>Hnrnpc</i>    | heterogeneous nuclear ribonucleoproteins C1/C2 isoform 1           | 40  | 4  | 0.92 | 0.80 | 35  | 4  | 0.98 | 0.96 |
| <i>Hnrnpd</i>    | Heterogeneous nuclear ribonucleoprotein D0 isoform d               | 78  | 5  | 0.83 | 0.90 | 68  | 4  | 0.83 | 0.94 |
| <i>Hnrmpf</i>    | heterogeneous nuclear ribonucleoprotein F                          | 84  | 4  | 0.89 | 0.95 | 68  | 2  | 0.88 | 0.84 |
| <i>HnrmpH1</i>   | Heterogeneous nuclear ribonucleoprotein H                          | 100 | 4  | 1.24 | 1.23 | 100 | 3  | 0.91 | 0.87 |
| <i>HnrmpH2</i>   | heterogeneous nuclear ribonucleoprotein H2                         | 28  | 3  | 1.52 | 0.76 | 33  | 3  | 1.17 | 0.97 |
| <i>HnrmpH3</i>   | Heterogeneous nuclear ribonucleoprotein H3                         | 3   | 1  | 1.22 | 1.03 | ND  | ND | ND   | ND   |
| <i>Hnrmpk</i>    | Heterogeneous nuclear ribonucleoprotein K                          | 168 | 11 | 0.93 | 0.93 | 106 | 9  | 0.89 | 0.88 |
| <i>Hnrmpl</i>    | heterogeneous nuclear ribonucleoprotein L                          | 27  | 4  | 1.04 | 1.15 | 22  | 3  | 1.63 | 1.23 |
| <i>Hnrmpm</i>    | Heterogeneous nuclear ribonucleoprotein M isoform b                | 52  | 9  | 0.88 | 0.89 | 46  | 8  | 0.86 | 0.92 |
| <i>Hnrmpr</i>    | heterogeneous nuclear ribonucleoprotein R                          | 13  | 3  | 0.93 | 0.88 | 10  | 2  | 0.86 | 1.01 |
| <i>Hnrmpu</i>    | Heterogeneous nuclear ribonucleoprotein U                          | 114 | 7  | 0.86 | 0.75 | 101 | 6  | 0.84 | 0.73 |
| <i>Hnrmpu1</i>   | heterogeneous nuclear ribonucleoprotein U-like protein 1 isoform 2 | 2   | 1  | 1.16 | 1.15 | 1   | 1  | 0.82 | 0.90 |
| <i>Hnrmpu2</i>   | Heterogeneous nuclear ribonucleoprotein U-like protein 2           | 39  | 5  | 1.12 | 0.87 | 39  | 5  | 1.01 | 0.84 |
| <i>Hnrpdl</i>    | Heterogeneous nuclear ribonucleoprotein D-like                     | 20  | 3  | 0.97 | 1.04 | ND  | ND | ND   | ND   |
| <i>Hnrpll</i>    | Heterogeneous nuclear ribonucleoprotein L-like                     | 4   | 1  | 1.87 | 1.30 | 4   | 1  | 0.98 | 0.68 |
| <i>Hook3</i>     | protein Hook homolog 3                                             | 3   | 1  | 1.10 | 1.02 | ND  | ND | ND   | ND   |
| <i>Hp</i>        | haptoglobin                                                        | 2   | 1  | 1.03 | 0.64 | ND  | ND | ND   | ND   |
| <i>Hp1bp3</i>    | heterochromatin protein 1-binding protein 3 isoform 2              | 21  | 3  | 0.81 | 0.85 | 13  | 2  | 0.82 | 1.00 |
| <i>Hpca</i>      | neuron-specific calcium-binding protein hippocalcin                | 1   | 1  | 0.85 | 1.01 | ND  | ND | ND   | ND   |
| <i>Hprt</i>      | hypoxanthine-guanine phosphoribosyltransferase                     | 6   | 2  | 0.91 | 1.02 | 2   | 1  | 1.03 | 0.99 |
| <i>Hpx</i>       | Hemopexin                                                          | 22  | 8  | 1.01 | 0.58 | 20  | 6  | 1.21 | 0.86 |

|                 |                                                           |     |    |      |      |     |    |      |      |
|-----------------|-----------------------------------------------------------|-----|----|------|------|-----|----|------|------|
| <i>Hr</i>       | protein hairless                                          | 3   | 1  | 1.59 | 1.72 | ND  | ND | ND   | ND   |
| <i>Hrg</i>      | histidine-rich glycoprotein                               | 1   | 1  | 1.15 | 0.59 | 3   | 1  | 1.06 | 0.66 |
| <i>Hrsp12</i>   | ribonuclease UK114                                        | 5   | 1  | 1.19 | 1.10 | 9   | 2  | 1.31 | 1.23 |
| <i>Hs1bp3</i>   | HCLS1-binding protein 3                                   | 5   | 1  | 0.97 | 1.09 | 2   | 1  | 1.10 | 1.24 |
| <i>Hsbp1</i>    | heat shock factor-binding protein 1                       | 3   | 1  | 0.58 | 0.44 | ND  | ND | ND   | ND   |
| <i>Hsd17b10</i> | 3-hydroxyacyl-CoA dehydrogenase type-2                    | 11  | 3  | 0.95 | 0.87 | 7   | 2  | 1.16 | 1.08 |
| <i>Hsd17b11</i> | Estradiol 17-beta-dehydrogenase 11                        | 2   | 2  | 0.54 | 0.60 | ND  | ND | ND   | ND   |
| <i>Hsd17b12</i> | estradiol 17-beta-dehydrogenase 12                        | 5   | 2  | 0.90 | 1.08 | 8   | 2  | 1.13 | 0.84 |
| <i>Hsd17b2</i>  | Estradiol 17-beta-dehydrogenase 2                         | 2   | 1  | 1.07 | 0.89 | 5   | 3  | 0.95 | 0.87 |
| <i>Hsd17b4</i>  | peroxisomal multifunctional enzyme type 2                 | 4   | 2  | 1.00 | 1.02 | 6   | 4  | 0.91 | 0.86 |
| <i>Hsd12</i>    | Hydroxysteroid dehydrogenase-like protein 2               | 3   | 1  | 0.95 | 1.16 | ND  | ND | ND   | ND   |
| <i>Hsp90aa1</i> | heat shock protein HSP 90-alpha                           | 219 | 13 | 0.84 | 0.87 | 189 | 12 | 0.81 | 0.93 |
| <i>Hsp90ab1</i> | heat shock protein HSP 90-beta                            | 298 | 15 | 0.90 | 0.93 | 255 | 13 | 0.90 | 0.92 |
| <i>Hsp90b1</i>  | endoplasmic                                               | 123 | 11 | 0.93 | 0.87 | 69  | 8  | 0.97 | 0.88 |
| <i>Hspa1a</i>   | Heat shock 70 kDa protein 1A                              | 653 | 17 | 2.89 | 2.71 | 666 | 16 | 0.90 | 1.03 |
| <i>Hspa1b</i>   | Heat shock 70 kDa protein 1B                              | 675 | 17 | 0.90 | 0.99 | 685 | 16 | 1.04 | 1.24 |
| <i>Hspa1l</i>   | Heat shock 70 kDa protein 1-like                          | 334 | 9  | 0.82 | 0.78 | 321 | 8  | 0.76 | 0.80 |
| <i>Hspa2</i>    | heat shock-related 70 kDa protein 2                       | 173 | 6  | 0.80 | 0.93 | ND  | ND | ND   | ND   |
| <i>Hspa4</i>    | Heat shock 70 kDa protein 4                               | 108 | 13 | 0.89 | 1.05 | 76  | 10 | 0.91 | 1.03 |
| <i>Hspa5</i>    | 78 kDa glucose-regulated protein                          | 93  | 14 | 0.89 | 0.85 | 77  | 10 | 0.84 | 0.84 |
| <i>Hspa8</i>    | heat shock cognate 71 kDa protein                         | 366 | 15 | 0.83 | 0.83 | 383 | 14 | 0.91 | 0.88 |
| <i>Hspa9</i>    | Stress-70 protein, mitochondrial                          | 56  | 11 | 0.83 | 0.84 | 50  | 10 | 0.84 | 0.84 |
| <i>Hspb1</i>    | Heat shock protein beta-1                                 | 182 | 5  | 0.94 | 1.10 | 192 | 6  | 0.95 | 1.09 |
| <i>Hspd1</i>    | 60 kDa heat shock protein, mitochondrial                  | 26  | 6  | 0.82 | 0.88 | 12  | 3  | 0.73 | 0.71 |
| <i>Hspe1</i>    | 10 kDa heat shock protein, mitochondrial                  | 1   | 1  | 0.94 | 0.82 | ND  | ND | ND   | ND   |
| <i>Hspg2</i>    | basement membrane-specific heparan sulfate proteoglycan c | 120 | 25 | 1.76 | 2.20 | 105 | 20 | 1.78 | 2.09 |
| <i>Hsph1</i>    | Heat shock protein 105 kDa                                | 1   | 1  | 1.06 | 1.14 | ND  | ND | ND   | ND   |
| <i>Htra1</i>    | serine protease HTRA1                                     | 1   | 1  | 0.95 | 0.95 | ND  | ND | ND   | ND   |
| <i>Huwe1</i>    | E3 ubiquitin-protein ligase HUWE1                         | 7   | 2  | 1.14 | 1.16 | 5   | 3  | 1.26 | 1.11 |
| <i>Hyou1</i>    | Hypoxia up-regulated protein 1                            | 17  | 4  | 0.94 | 0.85 | 19  | 5  | 0.89 | 0.87 |
| <i>Iars</i>     | isoleucyl-tRNA synthetase, cytoplasmic                    | 1   | 1  | 1.15 | 1.03 | ND  | ND | ND   | ND   |
| <i>Ide</i>      | Insulin-degrading enzyme                                  | 2   | 1  | 1.06 | 1.03 | ND  | ND | ND   | ND   |
| <i>Idh1</i>     | Isocitrate dehydrogenase [NADP] cytoplasmic               | 29  | 7  | 0.91 | 0.75 | 22  | 5  | 1.00 | 0.85 |
| <i>Idh2</i>     | isocitrate dehydrogenase [NADP], mitochondrial            | 7   | 3  | 0.92 | 0.92 | 4   | 2  | 0.91 | 0.93 |

|                  |                                                             |    |    |       |      |    |    |      |      |
|------------------|-------------------------------------------------------------|----|----|-------|------|----|----|------|------|
| <i>ldh3a</i>     | isocitrate dehydrogenase [NAD] subunit alpha, mitochondrial | 14 | 3  | 0.91  | 0.86 | 11 | 2  | 0.88 | 0.89 |
| <i>ldh3b</i>     | isocitrate dehydrogenase 3, beta subunit                    | 3  | 1  | 0.89  | 0.93 | ND | ND | ND   | ND   |
| <i>lfi202b</i>   | Interferon-activable protein 202                            | 3  | 2  | 0.78  | 1.01 | 2  | 2  | 1.02 | 1.08 |
| <i>lfi35</i>     | interferon-induced 35 kDa protein homolog                   | 2  | 1  | 1.03  | 1.01 | 3  | 1  | 1.01 | 1.34 |
| <i>lfitm3</i>    | interferon induced transmembrane protein 3                  | 3  | 1  | 1.05  | 0.97 | 1  | 1  | 1.18 | 1.11 |
| <i>lgbp1</i>     | immunoglobulin-binding protein 1                            | 1  | 1  | 0.83  | 0.84 | 1  | 1  | 1.00 | 1.05 |
| <i>lgfbp2</i>    | insulin-like growth factor-binding protein 2                | 13 | 3  | 1.98  | 1.54 | 18 | 2  | 1.89 | 1.50 |
| <i>lghg</i>      | PREDICTED: similar to Ig gamma-2b chain membrane isoform    | 94 | 6  | 0.89  | 0.85 | 86 | 6  | 0.92 | 0.90 |
| <i>lgh-VJ558</i> | PREDICTED: hypothetical protein                             | 1  | 1  | 0.81  | 0.79 | ND | ND | ND   | ND   |
| <i>lilf2</i>     | Interleukin enhancer-binding factor 2                       | 5  | 2  | 0.77  | 0.87 | 10 | 3  | 0.85 | 0.89 |
| <i>lilf3</i>     | Interleukin enhancer-binding factor 3 isoform 4             | 4  | 1  | 0.44  | 0.55 | 7  | 3  | 1.10 | 1.13 |
| <i>lmmt</i>      | mitochondrial inner membrane protein                        | 8  | 2  | 0.89  | 0.99 | 10 | 2  | 0.87 | 0.90 |
| <i>lmpa1</i>     | inositol monophosphatase 1                                  | 4  | 2  | 0.94  | 1.09 | 7  | 2  | 0.98 | 1.17 |
| <i>lnts3</i>     | integrator complex subunit 3                                | 2  | 1  | 18.57 | 0.84 | ND | ND | ND   | ND   |
| <i>lpo5</i>      | importin-5                                                  | 33 | 8  | 1.05  | 1.17 | 19 | 3  | 0.99 | 1.25 |
| <i>lpo7</i>      | importin-7                                                  | 3  | 1  | 1.15  | 0.92 | 3  | 1  | 1.76 | 1.54 |
| <i>lqqap1</i>    | ras GTPase-activating-like protein IQGAP1                   | 79 | 20 | 0.91  | 0.94 | 51 | 16 | 0.87 | 0.97 |
| <i>lqqap2</i>    | Ras GTPase-activating-like protein IQGAP2                   | 6  | 3  | 0.78  | 0.75 | ND | ND | ND   | ND   |
| <i>lrf6</i>      | Interferon regulatory factor 6                              | 11 | 4  | 1.16  | 0.87 | 4  | 2  | 1.05 | 0.94 |
| <i>lsoc1</i>     | isochorismatase domain-containing protein 1                 | 11 | 3  | 0.97  | 0.96 | 5  | 2  | 1.06 | 1.35 |
| <i>lsyna1</i>    | Inositol-3-phosphate synthase 1                             | 1  | 1  | 1.27  | 1.50 | ND | ND | ND   | ND   |
| <i>ltga3</i>     | integrin alpha-3                                            | 15 | 2  | 0.95  | 1.06 | 7  | 2  | 0.82 | 1.07 |
| <i>ltga6</i>     | integrin alpha-6                                            | 50 | 12 | 0.96  | 0.90 | 49 | 8  | 1.04 | 0.85 |
| <i>ltgav</i>     | Integrin alpha-V                                            | 3  | 1  | 0.94  | 1.14 | 2  | 1  | 0.96 | 1.08 |
| <i>ltgb1</i>     | integrin beta-1                                             | 6  | 2  | 1.05  | 0.94 | 9  | 1  | 1.09 | 0.96 |
| <i>ltgb4</i>     | Integrin beta 4 isoform 2                                   | 60 | 13 | 0.91  | 0.86 | 44 | 12 | 0.86 | 0.87 |
| <i>ltih1</i>     | Inter-alpha-trypsin inhibitor heavy chain H1                | 27 | 6  | 1.05  | 0.85 | 13 | 1  | 0.95 | 0.66 |
| <i>ltih2</i>     | inter-alpha-trypsin inhibitor heavy chain H2                | 7  | 1  | 0.95  | 0.86 | 14 | 2  | 1.04 | 0.80 |
| <i>ltih3</i>     | Inter-alpha-trypsin inhibitor heavy chain H3                | 3  | 1  | 1.22  | 0.70 | 3  | 1  | 1.19 | 0.69 |
| <i>ltih4</i>     | inter alpha-trypsin inhibitor, heavy chain 4 isoform 2      | 11 | 6  | 1.00  | 0.96 | 2  | 2  | 0.84 | 0.82 |
| <i>ltpa</i>      | inosine triphosphate pyrophosphatase                        | 18 | 3  | 1.19  | 1.24 | 11 | 4  | 1.18 | 1.12 |
| <i>ltpkc</i>     | inositol-trisphosphate 3-kinase C                           | 3  | 1  | 0.20  | 0.28 | 2  | 1  | 1.13 | 0.66 |
| <i>ltpr2</i>     | inositol 1,4,5-trisphosphate receptor type 2 isoform 2      | 3  | 2  | 1.36  | 0.23 | ND | ND | ND   | ND   |
| <i>ltpr3</i>     | inositol 1,4,5-trisphosphate receptor type 3                | 9  | 4  | 1.51  | 1.25 | 6  | 3  | 1.18 | 1.09 |

|                  |                                                              |      |    |      |      |      |    |      |      |
|------------------|--------------------------------------------------------------|------|----|------|------|------|----|------|------|
| <i>Ivd</i>       | isovaleryl-CoA dehydrogenase, mitochondrial                  | 6    | 4  | 0.96 | 1.06 | 4    | 2  | 1.00 | 0.91 |
| <i>Jup</i>       | junction plakoglobin                                         | 323  | 21 | 0.91 | 0.90 | 290  | 16 | 0.90 | 0.90 |
| <i>Kars</i>      | Lysyl-tRNA synthetase isoform 2                              | 3    | 1  | 0.97 | 0.97 | 2    | 1  | 1.03 | 1.12 |
| <i>Kcnma1</i>    | Calcium-activated potassium channel subunit alpha-1          | 1    | 1  | 2.43 | 1.47 | ND   | ND | ND   | ND   |
| <i>Kctd12</i>    | BTB/POZ domain-containing protein KCTD12                     | 20   | 4  | 0.87 | 1.03 | 19   | 2  | 0.93 | 1.08 |
| <i>Kdelc2</i>    | KDEL (Lys-Asp-Glu-Leu) containing 2 protein                  | 3    | 2  | 0.90 | 0.75 | 2    | 1  | 1.06 | 0.79 |
| <i>Kdsr</i>      | 3-Ketodihydrosphingosine reductase                           | 1    | 1  | 0.97 | 1.04 | 1    | 1  | 0.85 | 0.98 |
| <i>Kera</i>      | keratocan                                                    | 564  | 10 | 0.98 | 0.61 | 542  | 9  | 0.98 | 0.61 |
| <i>Khrbs1</i>    | KH domain-containing, RNA-binding, signal transduction-assoc | 6    | 2  | 0.95 | 1.01 | ND   | ND | ND   | ND   |
| <i>Khsrp</i>     | Far upstream element-binding protein 2                       | 6    | 3  | 1.17 | 0.62 | 9    | 3  | 0.93 | 0.88 |
| <i>Kidins220</i> | Kinase D-interacting substrate 220                           | 1    | 1  | 1.08 | 1.01 | 3    | 1  | ND   | ND   |
| <i>Kif13b</i>    | Kinesin family member 13B                                    | 10   | 2  | 0.86 | 1.13 | ND   | ND | ND   | ND   |
| <i>Kif1c</i>     | Kinesin-like protein KIF1C                                   | 1    | 1  | 1.23 | 1.18 | ND   | ND | ND   | ND   |
| <i>Kif21a</i>    | Kinesin-like protein KIF21A isoform 4                        | 16   | 6  | 0.91 | 0.93 | 14   | 5  | 0.97 | 1.02 |
| <i>Kif5b</i>     | kinesin-1 heavy chain                                        | 33   | 8  | 0.91 | 0.97 | 29   | 9  | 0.95 | 1.01 |
| <i>Klc1</i>      | Kinesin light chain 1 isoform 1A                             | 2    | 1  | 1.18 | 1.17 | 1    | 1  | 1.32 | 1.37 |
| <i>Klc3</i>      | kinesin light chain 3                                        | 7    | 2  | 1.07 | 0.72 | 6    | 2  | 0.08 | 0.66 |
| <i>Klc4</i>      | Kinesin light chain 4                                        | 4    | 1  | 1.22 | 1.18 | 2    | 1  | 1.27 | 1.20 |
| <i>Klh10</i>     | Kelch-like protein 10                                        | 2    | 1  | ND   | ND   | ND   | ND | ND   | ND   |
| <i>Kng1</i>      | Kininogen-1 isoform 2                                        | 14   | 4  | 1.00 | 0.52 | 7    | 2  | 0.96 | 0.49 |
| <i>Kpna1</i>     | importin subunit alpha-1                                     | 3    | 1  | 1.12 | 1.03 | ND   | ND | ND   | ND   |
| <i>Kpna4</i>     | importin subunit alpha-4                                     | 3    | 1  | 1.29 | 1.32 | 2    | 2  | 1.00 | 1.49 |
| <i>Kpnb1</i>     | importin subunit beta-1                                      | 48   | 8  | 0.97 | 0.96 | 52   | 7  | 1.02 | 1.02 |
| <i>Krt1</i>      | Keratin, type II cytoskeletal 1                              | 44   | 3  | 1.26 | 1.80 | 24   | 3  | 0.99 | 1.14 |
| <i>Krt10</i>     | Keratin, type I cytoskeletal 10                              | 125  | 7  | 1.23 | 1.49 | 92   | 6  | 1.24 | 1.45 |
| <i>Krt12</i>     | Keratin, type I cytoskeletal 12                              | 2403 | 18 | 0.84 | 0.90 | 2550 | 17 | 0.83 | 0.90 |
| <i>Krt13</i>     | keratin, type I cytoskeletal 13                              | 278  | 17 | 0.91 | 0.81 | 244  | 14 | 0.99 | 0.83 |
| <i>Krt14</i>     | keratin, type I cytoskeletal 14                              | 218  | 13 | 0.89 | 0.58 | 160  | 9  | 0.97 | 0.88 |
| <i>Krt15</i>     | keratin, type I cytoskeletal 15                              | 390  | 19 | 0.87 | 0.84 | 346  | 18 | 0.91 | 0.88 |
| <i>Krt18</i>     | keratin, type I cytoskeletal 18                              | 8    | 3  | ND   | ND   | 2    | 1  | 0.00 | 0.00 |
| <i>Krt19</i>     | keratin, type I cytoskeletal 19                              | 147  | 9  | 0.67 | 0.70 | 124  | 7  | 0.51 | 0.50 |
| <i>Krt2</i>      | Keratin, type II cytoskeletal 2 epidermal                    | 80   | 4  | 1.45 | 1.88 | 54   | 3  | 1.51 | 1.91 |
| <i>Krt20</i>     | keratin, type I cytoskeletal 20                              | 65   | 2  | ND   | ND   | 57   | 2  | 0.00 | 0.00 |
| <i>Krt24</i>     | Keratin, type I cytoskeletal 24                              | 349  | 3  | 0.79 | 0.82 | 183  | 3  | 0.82 | 0.89 |

|               |                                                       |      |    |      |       |      |    |      |       |
|---------------|-------------------------------------------------------|------|----|------|-------|------|----|------|-------|
| <i>Krt28</i>  | keratin, type I cytoskeletal 28                       | 35   | 2  | 0.90 | 0.98  | 7    | 2  | ND   | ND    |
| <i>Krt31</i>  | Keratin, type I cuticular Ha1                         | 9    | 3  | 0.72 | 3.84  | ND   | ND | ND   | ND    |
| <i>Krt35</i>  | keratin, type I cuticular Ha5                         | 8    | 2  | 0.45 | 0.52  | ND   | ND | ND   | ND    |
| <i>Krt4</i>   | Keratin, type II cytoskeletal 4                       | 206  | 8  | 0.92 | 0.70  | 280  | 6  | 0.83 | 0.73  |
| <i>Krt42</i>  | Keratin, type I cytoskeletal 42                       | 240  | 6  | 1.47 | 0.96  | 178  | 6  | 0.11 | 1.79  |
| <i>Krt5</i>   | keratin, type II cytoskeletal 5                       | 3677 | 27 | 0.81 | 0.88  | 3314 | 26 | 0.84 | 0.89  |
| <i>Krt6a</i>  | keratin, type II cytoskeletal 6A                      | 1463 | 23 | 0.86 | 0.84  | 1288 | 22 | 0.89 | 0.83  |
| <i>Krt6b</i>  | Keratin, type II cytoskeletal 6B                      | 1394 | 22 | 0.87 | 0.82  | 1220 | 20 | 0.83 | 0.83  |
| <i>Krt73</i>  | keratin, type II cytoskeletal 73                      | 97   | 5  | ND   | ND    | 72   | 5  | 0.00 | 0.00  |
| <i>Krt75</i>  | keratin, type II cytoskeletal 75                      | 803  | 8  | ND   | ND    | 671  | 8  | 0.00 | 0.00  |
| <i>Krt77</i>  | keratin, type II cytoskeletal 1b                      | 93   | 3  | 1.47 | 2.07  | 80   | 3  | 1.38 | 2.04  |
| <i>Krt78</i>  | Keratin Kb40                                          | 6    | 1  | 1.35 | 1.88  | 2    | 2  | 1.48 | 1.50  |
| <i>Krt79</i>  | keratin, type II cytoskeletal 79                      | 48   | 2  | 1.26 | 1.48  | 31   | 2  | 1.31 | 1.69  |
| <i>Krt8</i>   | Keratin, type II cytoskeletal 8                       | 208  | 9  | 0.24 | 0.24  | 124  | 9  | 0.33 | 0.39  |
| <i>Krt80</i>  | Keratin, type II cytoskeletal 80                      | 16   | 6  | 1.06 | 0.97  | 19   | 6  | 0.91 | 0.90  |
| <i>Krt82</i>  | keratin, type II cuticular Hb2                        | 2    | 1  | 0.68 | 0.93  | ND   | ND | ND   | ND    |
| <i>Krt85</i>  | keratin, type II cuticular Hb5                        | 9    | 2  | ND   | ND    | 6    | 2  | 0.00 | 0.00  |
| <i>Lad1</i>   | ladinin-1                                             | 4    | 2  | 1.04 | 0.97  | ND   | ND | ND   | ND    |
| <i>Lama2</i>  | Laminin subunit alpha-2                               | 8    | 2  | 1.62 | 1.92  | 4    | 2  | 1.57 | 1.74  |
| <i>Lama3</i>  | laminin subunit alpha-3                               | 30   | 9  | 1.17 | 1.17  | 41   | 11 | 1.07 | 1.10  |
| <i>Lama5</i>  | Laminin subunit alpha-5                               | 13   | 3  | 1.58 | 2.16  | 11   | 2  | 1.00 | 1.56  |
| <i>Lamb1</i>  | Laminin subunit beta-1                                | 12   | 3  | 1.18 | 1.69  | 6    | 2  | 1.09 | 2.00  |
| <i>Lamb2</i>  | laminin subunit beta-2                                | 13   | 4  | 1.65 | 2.25  | 7    | 4  | 1.77 | 2.25  |
| <i>Lamb3</i>  | Laminin subunit beta-3                                | 19   | 5  | 1.21 | 1.43  | 18   | 4  | 1.28 | 1.35  |
| <i>Lamc1</i>  | Laminin subunit gamma-1                               | 34   | 8  | 1.22 | 1.92  | 20   | 7  | 1.40 | 1.84  |
| <i>Lamc2</i>  | Laminin subunit gamma-2                               | 5    | 2  | 1.26 | 1.46  | 3    | 1  | 1.35 | 1.34  |
| <i>Lamp1</i>  | Lysosome-associated membrane glycoprotein 1           | 3    | 1  | 0.95 | 0.72  | ND   | ND | ND   | ND    |
| <i>Lamp2</i>  | lysosome-associated membrane glycoprotein 2 isoform 2 | 5    | 1  | 0.90 | 0.89  | 2    | 1  | 0.90 | 0.84  |
| <i>Lancl1</i> | lanC-like protein 1                                   | 17   | 1  | 1.61 | 1.66  | 16   | 1  | 1.42 | 1.54  |
| <i>Lap3</i>   | cytosol aminopeptidase                                | 1    | 1  | 1.40 | 0.95  | ND   | ND | ND   | ND    |
| <i>Larp1</i>  | la-related protein 1                                  | 2    | 1  | ND   | ND    | 3    | 2  | 0.98 | 1.01  |
| <i>Lars</i>   | Leucyl-tRNA synthetase, cytoplasmic                   | 22   | 5  | 1.15 | 1.00  | 12   | 3  | 0.95 | 0.88  |
| <i>Las1l</i>  | LAS1-like                                             | 4    | 1  | 2.25 | 33.07 | 7    | 1  | 1.46 | 22.86 |
| <i>Lasp1</i>  | LIM and SH3 domain protein 1                          | 34   | 3  | 0.96 | 0.91  | 45   | 3  | 0.96 | 0.99  |

|                     |                                                             |     |    |      |      |     |    |       |      |
|---------------------|-------------------------------------------------------------|-----|----|------|------|-----|----|-------|------|
| <i>Lbr</i>          | lamin-B receptor                                            | 2   | 1  | 1.41 | 0.06 | 7   | 2  | 1.69  | 1.00 |
| <i>Lcp1</i>         | plastin-2                                                   | 22  | 3  | 0.85 | 0.96 |     |    | ND    | ND   |
| <i>Ldha</i>         | L-lactate dehydrogenase A chain isoform 1                   | 194 | 9  | 0.99 | 0.98 | 161 | 7  | 0.96  | 0.99 |
| <i>Ldhb</i>         | L-lactate dehydrogenase B chain                             | 31  | 2  | 0.96 | 1.03 | 21  | 2  | 1.34  | 1.59 |
| <i>Lgals1</i>       | galectin-1                                                  | 29  | 3  | 0.99 | 0.85 | 38  | 1  | 0.99  | 0.81 |
| <i>Lgals7</i>       | galectin-7                                                  | 3   | 2  | 0.90 | 0.66 | 2   | 1  | 0.89  | 0.65 |
| <i>Lgmn</i>         | legumain                                                    | 4   | 1  | 0.87 | 1.34 | 7   | 1  | 1.15  | 1.10 |
| <i>Lima1</i>        | LIM domain and actin-binding protein 1 isoform b            | 6   | 2  | 0.87 | 0.85 | 5   | 1  | 0.90  | 1.03 |
| <i>Lin7b</i>        | protein lin-7 homolog B                                     | 5   | 2  | 1.41 | 1.35 | ND  | ND | ND    | ND   |
| <i>Lin7c</i>        | protein lin-7 homolog C                                     | 1   | 1  | 0.92 | 0.91 | ND  | ND | ND    | ND   |
| <i>Lman1</i>        | protein ERGIC-53                                            | 1   | 1  | 0.78 | 0.91 | ND  | ND | ND    | ND   |
| <i>Lmna</i>         | Lamin-A/C isoform A                                         | 151 | 17 | 0.96 | 0.94 | 109 | 15 | 0.96  | 0.93 |
| <i>Lmnb1</i>        | lamin-B1                                                    | 193 | 12 | 0.90 | 0.89 | 143 | 12 | 0.95  | 0.96 |
| <i>Lmnb2</i>        | Lamin-B2                                                    | 22  | 6  | 0.91 | 1.01 | 15  | 5  | 0.87  | 1.03 |
| <i>Lmo7</i>         | LIM domain only 7                                           | 10  | 5  | 0.94 | 0.90 | 4   | 2  | 1.06  | 1.03 |
| <i>Lnpep</i>        | leucyl-cystinyl aminopeptidase                              | 4   | 2  | 0.95 | 1.12 | ND  | ND | ND    | ND   |
| <i>LOC100038833</i> | PREDICTED: hypothetical protein                             | 12  | 2  | 1.30 | 0.71 | 12  | 1  | 1.33  | 0.76 |
| <i>LOC100039026</i> | PREDICTED: similar to Casein kinase 2, alpha 1 polypeptide  | 2   | 1  | 0.78 | 1.09 | 1   | 1  | 0.96  | 0.89 |
| <i>LOC100039155</i> | PREDICTED: similar to Sorting nexin 9                       | 8   | 2  | 0.95 | 0.95 | 4   | 1  | 0.93  | 0.98 |
| <i>LOC100039592</i> | PREDICTED: similar to nuclear pore-targeting complex comp   | 8   | 2  | 0.74 | 0.88 | 6   | 2  | 0.78  | 0.86 |
| <i>LOC100039888</i> | PREDICTED: similar to Pr22 isoform 1                        | 9   | 2  | 1.15 | 1.15 | 7   | 1  | 1.37  | 1.41 |
| <i>LOC100040177</i> | PREDICTED: similar to nuclear protein-NHP2-like protein     | 5   | 2  | 1.06 | 1.23 | 3   | 1  | 1.00  | 0.95 |
| <i>LOC100040898</i> | PREDICTED: similar to Glyceraldehyde-3-phosphate dehydro    | 214 | 8  | 1.10 | 0.94 | 234 | 8  | 1.02  | 0.98 |
| <i>LOC100041194</i> | PREDICTED: similar to KIAA2019 protein                      | 87  | 6  | 1.04 | 0.97 | 110 | 8  | 1.00  | 0.95 |
| <i>LOC100041230</i> | PREDICTED: similar to histone H4                            | 267 | 4  | 1.19 | 1.07 | 286 | 4  | 1.21  | 1.05 |
| <i>LOC100041471</i> | PREDICTED: hypothetical protein                             | 12  | 1  | 3.05 | 2.17 | 1   | 1  | 3.31  | 3.07 |
| <i>LOC100041480</i> | PREDICTED: similar to Myef2 protein                         | 2   | 1  | ND   | ND   | ND  | ND | ND    | ND   |
| <i>LOC100041823</i> | PREDICTED: similar to general transcription factor          | 2   | 1  | 8.91 | 1.15 | 2   | 1  | 1.05  | 0.89 |
| <i>LOC100041985</i> | PREDICTED: similar to Capping protein (actin filament) musc | 17  | 3  | 1.05 | 0.96 | 15  | 2  | 1.08  | 1.08 |
| <i>LOC100042069</i> | PREDICTED: similar to Inosine 5-phosphate dehydrogenase     | 10  | 2  | 0.86 | 0.86 | 14  | 2  | 0.92  | 0.97 |
| <i>LOC100042388</i> | PREDICTED: hypothetical protein                             | 12  | 5  | 1.16 | 1.06 | ND  | ND | ND    | ND   |
| <i>LOC100042448</i> | PREDICTED: similar to Poly A binding protein, cytoplasmic 4 | 1   | 1  | 2.00 | 1.33 | 1   | 1  | 14.33 | 0.97 |
| <i>LOC100042604</i> | PREDICTED: hypothetical protein                             | 6   | 1  | 1.18 | 0.98 | 8   | 1  | 1.35  | 1.03 |
| <i>LOC100042791</i> | PREDICTED: similar to ribosomal protein isoform 1           | 23  | 5  | 0.97 | 1.01 | 12  | 5  | 1.12  | 1.06 |



|              |                                                              |     |    |      |      |     |    |      |      |
|--------------|--------------------------------------------------------------|-----|----|------|------|-----|----|------|------|
| LOC100042823 | PREDICTED: similar to 60S ribosomal protein L9 isoform 2     | 14  | 1  | 0.87 | 0.90 | ND  | ND | ND   | ND   |
| LOC100042832 | PREDICTED: similar to 60S ribosomal protein L9 isoform 1     | 17  | 2  | 1.05 | 1.07 | ND  | ND | ND   | ND   |
| LOC100042959 | PREDICTED: similar to heterogeneous nuclear ribonucleopro    | 93  | 3  | ND   | ND   | 73  | 3  | 0.98 | 1.10 |
| LOC100043022 | PREDICTED: similar to Adhesion regulating molecule 1 isofor  | 7   | 2  | 0.92 | 1.02 | 3   | 1  | 1.26 | 1.20 |
| LOC100043141 | PREDICTED: similar to ribosomal protein L10a                 | 13  | 1  | 0.98 | 0.95 | 6   | 1  | 0.97 | 0.89 |
| LOC100043295 | PREDICTED: hypothetical protein                              | 19  | 3  | 0.99 | 0.93 | 14  | 3  | 1.10 | 1.09 |
| LOC100043527 | PREDICTED: similar to ribosomal protein S28                  | 57  | 2  | 1.10 | 0.99 | 46  | 2  | 1.11 | 1.01 |
| LOC100043555 | PREDICTED: similar to Aak1 protein                           | 10  | 2  | 0.87 | 0.89 | 6   | 2  | 0.92 | 1.03 |
| LOC100043703 | PREDICTED: hypothetical protein                              | 4   | 1  | 1.03 | 1.08 | 4   | 1  | 1.32 | 1.28 |
| LOC100043705 | PREDICTED: similar to MGC89287 protein                       | 30  | 2  | 1.01 | 1.05 | 22  | 2  | 1.10 | 1.01 |
| LOC100043734 | PREDICTED: hypothetical protein isoform 1                    | 46  | 3  | 0.96 | 0.94 | 51  | 3  | 0.93 | 0.93 |
| LOC100043740 | PREDICTED: hypothetical protein isoform 1                    | 32  | 1  | 1.07 | 1.03 | 9   | 1  | 1.02 | 1.00 |
| LOC100043859 | PREDICTED: similar to novel androgen binding protein (Abp)   | 1   | 1  | 2.20 | 1.75 | ND  | ND | ND   | ND   |
| LOC100043926 | PREDICTED: hypothetical protein                              | 1   | 1  | 0.96 | 1.45 | ND  | ND | ND   | ND   |
| LOC100043998 | PREDICTED: similar to nuclear pore complex-associated intra  | 1   | 1  | 0.76 | 0.86 | 1   | 1  | 0.77 | 0.89 |
| LOC100044052 | PREDICTED: similar to pericentriolar material gene 1 protein | 1   | 1  | 1.68 | 1.40 | ND  | ND | ND   | ND   |
| LOC100044177 | PREDICTED: hypothetical protein                              | 133 | 12 | 0.90 | 1.02 | 107 | 12 | 0.89 | 0.96 |
| LOC100044204 | PREDICTED: hypothetical protein                              | 8   | 4  | 1.28 | 1.78 | 17  | 5  | 0.96 | 1.03 |
| LOC100044223 | PREDICTED: hypothetical protein                              | 226 | 12 | 1.00 | 0.99 | 203 | 10 | 0.99 | 1.00 |
| LOC100044385 | PREDICTED: hypothetical protein                              | 32  | 5  | 0.91 | 0.88 | ND  | ND | ND   | ND   |
| LOC100044492 | PREDICTED: hypothetical protein                              | 16  | 2  | 1.41 | 1.36 | 28  | 3  | 1.20 | 1.14 |
| LOC100044500 | PREDICTED: similar to Dsg2 protein                           | 4   | 1  | 0.93 | 0.44 | 1   | 1  | 0.99 | 1.20 |
| LOC100044537 | PREDICTED: similar to Group specific component               | 2   | 1  | 0.88 | 0.58 | 4   | 1  | 0.91 | 0.58 |
| LOC100044591 | PREDICTED: similar to ribosomal protein L35a                 | 2   | 1  | 1.11 | 0.99 | 1   | 1  | 1.36 | 1.00 |
| LOC100044600 | PREDICTED: hypothetical protein                              | 11  | 2  | 0.96 | 1.09 | ND  | ND | ND   | ND   |
| LOC100044692 | PREDICTED: similar to aldehyde reductase                     | 6   | 4  | 1.12 | 1.08 | 9   | 3  | 1.25 | 1.17 |
| LOC100044829 | PREDICTED: similar to Fibrillarin isoform 2                  | 4   | 1  | 0.95 | 0.89 | 9   | 1  | 0.93 | 0.92 |
| LOC100044854 | PREDICTED: hypothetical protein                              | 2   | 1  | 0.97 | 1.04 | 2   | 2  | 1.27 | 1.25 |
| LOC100044900 | PREDICTED: similar to Chain A, Crystal Structure Of Human    | 1   | 1  | 1.16 | 0.57 | ND  | ND | ND   | ND   |
| LOC100045055 | PREDICTED: similar to cellular retinol binding protein I     | 28  | 4  | 1.05 | 0.95 | 24  | 3  | 1.00 | 1.00 |
| LOC100045062 | PREDICTED: similar to small zinc finger-like protein         | 2   | 1  | 0.94 | 0.97 | 1   | 1  | 0.90 | 0.98 |
| LOC100045296 | PREDICTED: similar to Stat3B                                 | 1   | 1  | 0.94 | 0.97 | ND  | ND | ND   | ND   |
| LOC100045304 | PREDICTED: similar to neurofilament protein                  | 61  | 2  | ND   | ND   | ND  | ND | ND   | ND   |
| LOC100045432 | PREDICTED: similar to Stromal interaction molecule 1         | 12  | 2  | 0.85 | 0.93 | 4   | 1  | 0.60 | 0.66 |

|              |                                                                |     |   |      |      |     |    |      |      |
|--------------|----------------------------------------------------------------|-----|---|------|------|-----|----|------|------|
| LOC100045439 | PREDICTED: similar to testis-specific adriamycin sensitivity p | 3   | 2 | 1.67 | 2.77 | 1   | 1  | 1.08 | 2.32 |
| LOC100045504 | PREDICTED: similar to hCG1994130                               | 30  | 5 | 1.06 | 1.10 | 19  | 3  | 1.04 | 1.07 |
| LOC100045567 | PREDICTED: similar to purine nucleoside phosphorylase          | 13  | 3 | 0.85 | 1.04 | 8   | 3  | 1.44 | 1.46 |
| LOC100045659 | PREDICTED: similar to hCG1640785                               | 15  | 2 | 0.85 | 0.95 | ND  | ND | ND   | ND   |
| LOC100045680 | PREDICTED: similar to complement C4                            | 2   | 1 | 1.01 | 0.77 | 2   | 1  | 1.06 | 0.99 |
| LOC100045699 | PREDICTED: similar to Electron transferring flavoprotein, beta | 24  | 4 | 0.91 | 0.89 | 15  | 3  | 0.85 | 0.89 |
| LOC100045782 | PREDICTED: similar to leucine rich repeat containing 47        | 6   | 1 | 0.94 | 0.97 | 6   | 1  | 0.98 | 0.90 |
| LOC100045866 | PREDICTED: similar to elongation factor SIII p15 subunit       | 13  | 2 | 1.36 | 1.27 | ND  | ND | ND   | ND   |
| LOC100045887 | PREDICTED: similar to PTB-associated splicing factor           | 36  | 6 | 0.96 | 1.00 | 16  | 7  | 0.97 | 1.06 |
| LOC100045937 | PREDICTED: hypothetical protein isoform 1                      | 2   | 1 | 1.33 | 0.89 | ND  | ND | ND   | ND   |
| LOC100045937 | PREDICTED: hypothetical protein isoform 2                      | 2   | 1 | 1.59 | 1.48 | ND  | ND | ND   | ND   |
| LOC100045958 | PREDICTED: similar to hCG45299 isoform 2                       | 21  | 2 | 0.45 | 0.96 | 27  | 3  | 1.01 | 0.81 |
| LOC100046035 | PREDICTED: similar to ADAM23                                   | 1   | 1 | 1.35 | 1.53 | ND  | ND | ND   | ND   |
| LOC100046039 | PREDICTED: similar to histone deacetylase HD1                  | 2   | 1 | 0.91 | 0.96 | 1   | 1  | 0.86 | 0.96 |
| LOC100046074 | PREDICTED: hypothetical protein                                | 1   | 1 | 0.90 | 1.08 | ND  | ND | ND   | ND   |
| LOC100046079 | PREDICTED: hypothetical protein                                | 2   | 1 | 1.02 | 1.43 | ND  | ND | ND   | ND   |
| LOC100046081 | PREDICTED: similar to OTU domain, ubiquitin aldehyde bindi     | 10  | 2 | 0.95 | 0.90 | 11  | 2  | 0.91 | 0.85 |
| LOC100046120 | PREDICTED: similar to clusterin                                | 20  | 3 | 1.03 | 0.91 | 15  | 2  | 1.08 | 0.91 |
| LOC100046151 | PREDICTED: similar to Solute carrier family 25 (mitochondria   | 49  | 8 | 1.14 | 1.09 | 31  | 7  | 1.12 | 1.10 |
| LOC100046198 | PREDICTED: similar to TF-1 apoptosis related protein 19        | 4   | 2 | 1.23 | 0.98 | 4   | 2  | 0.99 | 0.91 |
| LOC100046213 | PREDICTED: similar to Hist1h2bj protein                        | 623 | 4 | 0.95 | 0.86 | 553 | 4  | 0.97 | 0.86 |
| LOC100046321 | PREDICTED: hypothetical protein                                | 2   | 1 | 0.74 | 0.81 | ND  | ND | ND   | ND   |
| LOC100046344 | PREDICTED: similar to Nucleoside diphosphate kinase A (ND      | 23  | 4 | 1.12 | 1.17 | ND  | ND | ND   | ND   |
| LOC100046434 | PREDICTED: similar to carboxypeptidase E                       | 1   | 1 | ND   | ND   | ND  | ND | ND   | ND   |
| LOC100046567 | PREDICTED: hypothetical protein isoform 1                      | 5   | 1 | 0.78 | 0.98 | ND  | ND | ND   | ND   |
| LOC100046589 | PREDICTED: similar to platelet-activating factor acetylhydrola | 6   | 2 | 1.02 | 0.99 | ND  | ND | ND   | ND   |
| LOC100046610 | PREDICTED: hypothetical protein                                | 52  | 2 | 0.92 | 1.02 | ND  | ND | ND   | ND   |
| LOC100046627 | PREDICTED: hypothetical protein                                | 3   | 1 | 1.46 | 4.57 | 3   | 1  | 1.77 | 3.45 |
| LOC100046668 | PREDICTED: similar to yeast ribosomal protein S28 homolog      | 12  | 1 | 0.87 | 0.74 | 6   | 1  | 0.89 | 0.66 |
| LOC100046698 | PREDICTED: similar to Probable ATP-dependent RNA helica        | 9   | 3 | 1.01 | 0.98 | 4   | 2  | 1.03 | 0.88 |
| LOC100046741 | PREDICTED: similar to red-1                                    | 1   | 1 | ND   | ND   | ND  | ND | ND   | ND   |
| LOC100046744 | PREDICTED: similar to Serine/arginine repetitive matrix prote  | 3   | 1 | 1.19 | 1.01 | 1   | 1  | 1.11 | 1.01 |
| LOC100046745 | PREDICTED: hypothetical protein                                | 3   | 3 | 1.00 | 0.91 | 16  | 4  | 0.82 | 0.90 |
| LOC100046781 | PREDICTED: similar to carboxypeptidase D                       | 2   | 2 | 1.03 | 0.92 | ND  | ND | ND   | ND   |

|              |                                                                |     |   |      |      |     |    |      |      |
|--------------|----------------------------------------------------------------|-----|---|------|------|-----|----|------|------|
| LOC100046823 | PREDICTED: similar to proliferating cell nuclear antigen (DNA  | 6   | 2 | 1.15 | 1.10 | ND  | ND | ND   | ND   |
| LOC100046934 | PREDICTED: similar to amine oxidase (flavin containing) dom    | 2   | 1 | 0.93 | 1.23 | ND  | ND | ND   | ND   |
| LOC100046995 | PREDICTED: similar to 5-aminoimidazole-4-carboxamide ribo      | 37  | 7 | 1.06 | 1.04 | 22  | 4  | 0.99 | 1.04 |
| LOC100047005 | PREDICTED: hypothetical protein                                | 5   | 2 | 1.45 | 0.96 | ND  | ND | ND   | ND   |
| LOC100047016 | PREDICTED: similar to GCN1 general control of amino-acid s     | 7   | 3 | 1.32 | 1.30 | 1   | 1  | 1.23 | 1.11 |
| LOC100047029 | PREDICTED: similar to Transcriptional repressor p66 alpha (C   | 12  | 2 | 1.04 | 0.97 | ND  | ND | ND   | ND   |
| LOC100047184 | PREDICTED: similar to proteasome alpha7/C8 subunit             | 1   | 1 | 1.01 | 1.20 | ND  | ND | ND   | ND   |
| LOC100047252 | PREDICTED: similar to Phosphoserine aminotransferase 1 is      | 23  | 5 | 1.02 | 0.91 | 4   | 3  | 1.05 | 0.92 |
| LOC100047340 | PREDICTED: hypothetical protein                                | 3   | 2 | 0.93 | 0.99 | 2   | 1  | 0.83 | 1.01 |
| LOC100047372 | PREDICTED: similar to ribosomal protein L22                    | 28  | 2 | 1.08 | 1.02 | 23  | 2  | 1.03 | 1.00 |
| LOC100047429 | PREDICTED: hypothetical protein                                | 13  | 3 | 0.94 | 0.87 | 18  | 4  | 0.92 | 0.85 |
| LOC100047577 | PREDICTED: hypothetical protein                                | 4   | 1 | 0.85 | 0.82 | 2   | 1  | 0.83 | 0.90 |
| LOC100047603 | PREDICTED: similar to Discs, large homolog 1 (Drosophila) is   | 1   | 1 | 1.08 | 1.13 | ND  | ND | ND   | ND   |
| LOC100047628 | PREDICTED: similar to Chain L, Structural Basis Of Antigen M   | 13  | 1 | 0.92 | 0.54 | 4   | 1  | 0.78 | 0.64 |
| LOC100047647 | PREDICTED: similar to diphosphoinositol polyphosphate pho      | 2   | 1 | 1.98 | 0.60 | 1   | 1  | 0.04 | 0.12 |
| LOC100047658 | PREDICTED: similar to Eukaryotic translation initiation factor | 7   | 2 | 0.80 | 1.22 | ND  | ND | ND   | ND   |
| LOC100047696 | PREDICTED: similar to Eukaryotic translation initiation factor | 18  | 6 | 1.00 | 1.02 | ND  | ND | ND   | ND   |
| LOC100047722 | PREDICTED: similar to airway trypsin-like protease             | 1   | 1 | 0.08 | 0.15 | ND  | ND | ND   | ND   |
| LOC100047753 | PREDICTED: similar to Nucleoside diphosphate kinase A (ND      | 26  | 3 | 1.66 | 1.43 | ND  | ND | ND   | ND   |
| LOC100047777 | PREDICTED: hypothetical protein                                | 1   | 1 | 3.54 | 3.13 | 5   | 1  | 3.14 | 2.92 |
| LOC100047806 | PREDICTED: hypothetical protein                                | 3   | 1 | 1.16 | 0.71 | 1   | 1  | 1.32 | 0.93 |
| LOC100047864 | PREDICTED: hypothetical protein                                | 1   | 1 | 0.90 | 1.23 | ND  | ND | ND   | ND   |
| LOC100048066 | PREDICTED: similar to THUMP domain containing 1                | 3   | 1 | 0.80 | 1.10 | 3   | 1  | 0.96 | 1.18 |
| LOC100048153 | PREDICTED: similar to Rps16 protein                            | 49  | 5 | 1.15 | 1.05 | 53  | 5  | 1.07 | 1.11 |
| LOC100048339 | PREDICTED: similar to ribosomal protein L36a                   | 3   | 1 | 6.88 | 6.51 | 2   | 1  | 4.41 | 3.98 |
| LOC100048340 | PREDICTED: hypothetical protein                                | 45  | 3 | 1.07 | 1.04 | 48  | 3  | 1.09 | 1.03 |
| LOC100048385 | PREDICTED: hypothetical protein                                | 184 | 7 | 0.88 | 0.90 | 141 | 7  | 0.88 | 0.91 |
| LOC100048397 | PREDICTED: similar to GTP-binding protein (smg p21B)           | 32  | 4 | 1.04 | 0.98 | 24  | 3  | 1.01 | 0.91 |
| LOC100048445 | PREDICTED: similar to fau                                      | 3   | 1 | 0.91 | 1.07 | 2   | 1  | 0.87 | 0.82 |
| LOC100048462 | PREDICTED: similar to QM protein                               | 34  | 3 | 1.01 | 1.07 | 17  | 2  | 0.94 | 0.93 |
| LOC100048481 | PREDICTED: similar to Apoptosis inhibitor 5                    | 1   | 1 | 1.37 | 1.18 | ND  | ND | ND   | ND   |
| LOC100048522 | PREDICTED: similar to Cofilin-1 (Cofilin, non-muscle isoform)  | 29  | 3 | 1.21 | 0.88 | 27  | 2  | 0.93 | 1.08 |
| LOC100048552 | PREDICTED: hypothetical protein                                | 9   | 2 | 2.08 | 1.92 | 1   | 1  | 2.58 | 2.24 |
| LOC100048597 | PREDICTED: similar to DnaJ-like protein                        | 1   | 1 | ND   | ND   | ND  | ND | ND   | ND   |

|              |                                                                 |     |   |      |      |     |    |      |      |
|--------------|-----------------------------------------------------------------|-----|---|------|------|-----|----|------|------|
| LOC100048622 | PREDICTED: similar to EF-hand Ca2+ binding protein p22          | 2   | 1 | 0.27 | 0.30 | ND  | ND | ND   | ND   |
| LOC100048652 | PREDICTED: similar to Gsta2 protein                             | 36  | 5 | 0.95 | 1.01 | 30  | 4  | 0.93 | 1.08 |
| LOC100048746 | PREDICTED: similar to translation initiation factor eIF-2 gamma | 10  | 3 | 1.29 | 1.45 | 6   | 2  | 0.94 | 1.12 |
| LOC100048812 | PREDICTED: hypothetical protein                                 | 1   | 1 | 0.95 | 0.87 | 2   | 1  | 1.03 | 0.97 |
| LOC194960    | PREDICTED: hypothetical protein                                 | 41  | 2 | 1.02 | 0.99 | 22  | 2  | 1.02 | 1.09 |
| LOC384091    | PREDICTED: similar to Snrpf protein                             | 1   | 1 | 1.31 | 1.13 | ND  | ND | ND   | ND   |
| LOC433712    | PREDICTED: similar to 67 kda laminin receptor                   | 85  | 4 | 1.57 | 1.37 | 70  | 4  | 0.98 | 1.10 |
| LOC545592    | PREDICTED: similar to heterogeneous nuclear ribonucleopro       | 146 | 5 | 0.90 | 0.91 | 107 | 5  | 0.87 | 0.87 |
| LOC545679    | PREDICTED: similar to ferritin light chain 2                    | 2   | 1 | 0.60 | 1.42 | 2   | 1  | 1.83 | 1.13 |
| LOC545867    | PREDICTED: similar to Chain , Calmodulin                        | 53  | 2 | 1.05 | 0.91 | ND  | ND | ND   | ND   |
| LOC546233    | PREDICTED: hypothetical protein                                 | 1   | 1 | 1.01 | 0.90 | ND  | ND | ND   | ND   |
| LOC620017    | PREDICTED: similar to Ig kappa chain V-V region L7              | 3   | 1 | 0.66 | 0.85 | ND  | ND | ND   | ND   |
| LOC620499    | PREDICTED: similar to hCG1782167                                | 1   | 1 | 1.26 | 1.65 | ND  | ND | ND   | ND   |
| LOC625646    | PREDICTED: similar to ribosomal protein L38                     | 9   | 2 | 1.10 | 0.94 | 1   | 1  | 1.01 | 0.91 |
| LOC626683    | PREDICTED: hypothetical protein                                 | 9   | 3 | 1.50 | 1.25 | ND  | ND | ND   | ND   |
| LOC630729    | PREDICTED: hypothetical protein                                 | 5   | 1 | 1.11 | 1.15 | ND  | ND | ND   | ND   |
| LOC631286    | PREDICTED: similar to protein-tyrosine-phosphatase              | 3   | 2 | 1.05 | 1.11 | 3   | 2  | 0.99 | 1.16 |
| LOC634100    | PREDICTED: similar to Ab 414.2 heavy chain variable and joi     | 6   | 2 | 0.97 | 1.16 | 6   | 2  | 1.08 | 1.17 |
| LOC635310    | PREDICTED: similar to ribosomal protein S2 isoform 2            | 8   | 2 | ND   | ND   | 5   | 2  | 0.98 | 0.93 |
| LOC635419    | PREDICTED: hypothetical protein                                 | 7   | 2 | ND   | ND   | 1   | 1  | 0.00 | 0.00 |
| LOC636537    | PREDICTED: similar to translocon-associated protein alpha, r    | 2   | 1 | 1.49 | 1.20 | 5   | 1  | 1.14 | 0.94 |
| LOC637313    | PREDICTED: similar to isolog of yeast sui1 and rice gos2; put   | 2   | 1 | 0.81 | 0.88 | ND  | ND | ND   | ND   |
| LOC638399    | PREDICTED: hypothetical protein isoform 1                       | 36  | 2 | 0.97 | 1.03 | 28  | 3  | 0.93 | 1.02 |
| LOC638908    | PREDICTED: similar to Adaptor-related protein complex AP-1      | 1   | 1 | 0.94 | 1.04 | ND  | ND | ND   | ND   |
| LOC639119    | PREDICTED: hypothetical protein                                 | 1   | 1 | 4.43 | 2.67 | 1   | 1  | 5.45 | 3.27 |
| LOC639606    | PREDICTED: hypothetical protein isoform 1                       | 58  | 6 | 1.03 | 0.43 | 58  | 6  | 0.98 | 0.40 |
| LOC640369    | PREDICTED: similar to Rab5B                                     | 39  | 4 | 0.73 | 1.08 | 30  | 4  | 1.16 | 1.51 |
| LOC664947    | PREDICTED: hypothetical protein                                 | 24  | 1 | 0.93 | 0.87 | ND  | ND | ND   | ND   |
| LOC668186    | PREDICTED: similar to Cell division cycle 5-like (S. pombe)     | 1   | 1 | 0.81 | 0.52 | ND  | ND | ND   | ND   |
| LOC669005    | PREDICTED: similar to NFkB interacting protein 1                | 19  | 5 | 1.07 | 1.15 | 14  | 3  | 1.00 | 1.10 |
| LOC670565    | PREDICTED: similar to ribosomal protein S7                      | 37  | 1 | 1.03 | 0.90 | 19  | 1  | 0.96 | 0.92 |
| LOC671392    | PREDICTED: similar to protein phosphatase 2A inhibitor-2 l-2    | 30  | 2 | 0.95 | 0.93 | 18  | 1  | 0.85 | 0.94 |
| LOC672594    | PREDICTED: hypothetical protein                                 | 71  | 7 | 0.92 | 0.87 | 74  | 7  | 0.89 | 0.86 |
| LOC673748    | PREDICTED: similar to cytochrome P450, CYP3A                    | 4   | 1 | 1.03 | 1.07 | ND  | ND | ND   | ND   |

|                  |                                                                |     |    |      |      |     |    |      |      |
|------------------|----------------------------------------------------------------|-----|----|------|------|-----|----|------|------|
| <i>LOC674583</i> | PREDICTED: similar to mitochondrial ATP synthase coupling      | 13  | 2  | 0.81 | 0.83 | 7   | 1  | 0.72 | 0.84 |
| <i>LOC674810</i> | PREDICTED: similar to Ribosomal protein L3                     | 16  | 3  | 0.65 | 0.70 | 12  | 3  | 0.55 | 0.83 |
| <i>LOC675857</i> | PREDICTED: similar to valosin isoform 1                        | 248 | 21 | 0.97 | 1.30 | 238 | 19 | 0.95 | 1.12 |
| <i>LOC675985</i> | PREDICTED: similar to ribosomal protein S6                     | 46  | 3  | 1.12 | 1.95 | ND  | ND | ND   | ND   |
| <i>LOC676974</i> | PREDICTED: similar to Glucose phosphate isomerase 1 isofo      | 26  | 5  | 0.91 | 1.06 | 15  | 3  | 0.93 | 1.09 |
| <i>LOC677073</i> | PREDICTED: hypothetical protein                                | 37  | 5  | 1.00 | 0.86 | ND  | ND | ND   | ND   |
| <i>LOC677305</i> | PREDICTED: similar to C6orf205 protein                         | 4   | 1  | 0.78 | 0.86 | ND  | ND | ND   | ND   |
| <i>LOC677344</i> | PREDICTED: similar to S-adenosylhomocysteine hydrolase         | 22  | 3  | 1.00 | 1.13 | 13  | 2  | 1.05 | 1.24 |
| <i>LOC677576</i> | PREDICTED: similar to 3-methylcrotonyl-CoA carboxylase alp     | 1   | 1  | 1.04 | 1.13 | ND  | ND | ND   | ND   |
| <i>Lonp1</i>     | Lon protease homolog, mitochondrial                            | 3   | 2  | 0.89 | 0.90 | 1   | 1  | 0.98 | 0.86 |
| <i>Lox</i>       | Protein-lysine 6-oxidase                                       | 2   | 1  | 5.99 | 4.91 | 3   | 1  | 2.69 | 2.18 |
| <i>Lox1</i>      | lysyl oxidase homolog 1                                        | 1   | 1  | 1.55 | 1.92 | ND  | ND | ND   | ND   |
| <i>Lpar3</i>     | Lysophosphatidic acid receptor 3                               | 1   | 1  | 4.62 | 3.06 | ND  | ND | ND   | ND   |
| <i>Lpcat3</i>    | lysophospholipid acyltransferase 5                             | 1   | 1  | 1.68 | 1.78 | ND  | ND | ND   | ND   |
| <i>Lpcat4</i>    | lysophospholipid acyltransferase LPCAT4                        | 3   | 1  | 1.09 | 1.10 | ND  | ND | ND   | ND   |
| <i>Lpp</i>       | lipoma-preferred partner homolog isoform 2                     | 1   | 1  | 0.89 | 0.87 | 1   | 1  | 0.81 | 0.77 |
| <i>Lrba</i>      | Lipopolysaccharide-responsive and beige-like anchor protein    | 6   | 3  | 1.07 | 1.08 | ND  | ND | ND   | ND   |
| <i>Lrg1</i>      | Leucine-rich alpha-2-glycoprotein                              | 10  | 2  | 0.92 | 0.45 | 7   | 1  | 1.03 | 0.66 |
| <i>Lrp1</i>      | Prolow-density lipoprotein receptor-related protein 1          | 45  | 7  | 0.99 | 1.05 | 32  | 7  | 1.06 | 1.00 |
| <i>Lrp1b</i>     | Low-density lipoprotein receptor-related protein 1B            | 1   | 1  | 0.75 | 0.92 | ND  | ND | ND   | ND   |
| <i>Lrpap1</i>    | alpha-2-macroglobulin receptor-associated protein              | 6   | 1  | 0.92 | 0.83 | 5   | 1  | 1.34 | 1.15 |
| <i>Lrpprc</i>    | Leucine-rich PPR motif-containing protein, mitochondrial       | 8   | 2  | 1.19 | 1.14 | ND  | ND | ND   | ND   |
| <i>Lrrc59</i>    | leucine-rich repeat-containing protein 59                      | 2   | 1  | 0.97 | 0.95 | 5   | 2  | 0.85 | 0.81 |
| <i>Lrrfip1</i>   | Leucine-rich repeat flightless-interacting protein 1 isoform 1 | 3   | 2  | 1.48 | 0.95 | ND  | ND | ND   | ND   |
| <i>Lsm2</i>      | U6 snRNA-associated Sm-like protein LSm2 isoform 2             | 3   | 2  | 0.83 | 0.73 | ND  | ND | ND   | ND   |
| <i>Lsm3</i>      | U6 snRNA-associated Sm-like protein LSm3                       | 6   | 1  | 1.04 | 1.38 | 3   | 1  | 1.08 | 1.09 |
| <i>Lss</i>       | lanosterol synthase                                            | 3   | 1  | 1.21 | 1.21 | 3   | 1  | 1.26 | 1.12 |
| <i>Lta4h</i>     | Leukotriene A-4 hydrolase                                      | 47  | 10 | 0.95 | 0.93 | 11  | 6  | 1.03 | 1.08 |
| <i>Ltbp1</i>     | latent-transforming growth factor beta-binding protein 1 isofo | 6   | 2  | 1.44 | 1.38 | ND  | ND | ND   | ND   |
| <i>Ltbp4</i>     | Latent-transforming growth factor beta-binding protein 4 isofo | 1   | 1  | 0.98 | 4.91 | 3   | 2  | 1.26 | 2.78 |
| <i>Lum</i>       | Lumican                                                        | 713 | 11 | 0.80 | 0.13 | 782 | 11 | 0.83 | 0.11 |
| <i>Lxn</i>       | latexin                                                        | 9   | 2  | 0.84 | 0.88 | 6   | 2  | 0.85 | 0.86 |
| <i>Ly6g6c</i>    | Lymphocyte antigen 6 complex locus protein G6c                 | 11  | 3  | 1.49 | 1.83 | 2   | 2  | 1.13 | 1.10 |
| <i>Lypd2</i>     | Ly6/PLAUR domain-containing protein 2                          | 2   | 1  | 2.52 | 0.06 | 6   | 1  | 1.35 | 0.91 |

|                 |                                                              |     |    |       |      |     |    |       |       |
|-----------------|--------------------------------------------------------------|-----|----|-------|------|-----|----|-------|-------|
| <i>Lypd3</i>    | ly6/PLAUR domain-containing protein 3                        | 18  | 2  | 4.38  | 3.96 | 7   | 2  | 4.91  | 4.06  |
| <i>Lypla2</i>   | acyl-protein thioesterase 2                                  | 2   | 1  | 1.36  | 1.35 | ND  | ND | ND    | ND    |
| <i>Lyplal1</i>  | lysophospholipase-like protein 1                             | 2   | 1  | 1.10  | 1.15 | ND  | ND | ND    | ND    |
| <i>Lztf1</i>    | Leucine zipper transcription factor-like protein 1           | 4   | 2  | 0.89  | 1.02 | 2   | 1  | 0.94  | 0.84  |
| <i>M6pr</i>     | Cation-dependent mannose-6-phosphate receptor                | 3   | 1  | 3.97  | 1.63 | 9   | 1  | 1.48  | 1.09  |
| <i>Macf1</i>    | Microtubule-actin cross-linking factor 1                     | 2   | 2  | 1.01  | 0.94 | ND  | ND | ND    | ND    |
| <i>Macro1</i>   | MACRO domain-containing protein 1                            | 3   | 1  | 0.71  | 1.17 | ND  | ND | ND    | ND    |
| <i>Mad11</i>    | mitotic spindle assembly checkpoint protein MAD1             | 2   | 1  | 11.87 | 1.06 | 1   | 1  | 16.22 | 21.92 |
| <i>Mal2</i>     | protein MAL2                                                 | 20  | 1  | 1.29  | 1.34 | 16  | 1  | 1.14  | 1.32  |
| <i>Mamdc2</i>   | MAM domain-containing protein 2                              | 133 | 14 | 1.29  | 1.10 | 92  | 13 | 1.36  | 1.13  |
| <i>Map4k4</i>   | Mitogen-activated protein kinase kinase kinase kinase 4      | 1   | 1  | ND    | ND   | ND  | ND | ND    | ND    |
| <i>Mapk1</i>    | mitogen-activated protein kinase 1                           | 20  | 5  | 1.13  | 1.29 | 21  | 4  | 1.04  | 1.05  |
| <i>Mapk3</i>    | mitogen-activated protein kinase 3                           | 19  | 5  | 1.03  | 0.91 | 25  | 5  | 0.97  | 0.97  |
| <i>Mapkapk3</i> | MAP kinase-activated protein kinase 3                        | 6   | 1  | 3.51  | 0.89 | 7   | 2  | 0.55  | 1.35  |
| <i>Marcks</i>   | myristoylated alanine-rich C-kinase substrate                | 12  | 2  | 2.01  | 4.16 | 14  | 1  | 8.67  | 1.57  |
| <i>Mars</i>     | methionyl-tRNA synthetase, cytoplasmic isoform 2             | 6   | 1  | 1.13  | 1.12 | 4   | 1  | 1.10  | 0.95  |
| <i>Masp2</i>    | mannan-binding lectin serine protease 2 isoform 2            | 1   | 1  | 1.29  | 1.48 | ND  | ND | ND    | ND    |
| <i>Mat2a</i>    | S-adenosylmethionine synthetase isoform type-2               | 10  | 3  | 1.06  | 1.04 | 7   | 1  | 1.05  | 1.10  |
| <i>Mat2b</i>    | methionine adenosyltransferase 2 subunit beta                | 9   | 2  | 0.85  | 0.95 | 6   | 2  | 0.93  | 1.06  |
| <i>Matn4</i>    | matrilin-4                                                   | 4   | 2  | 0.97  | 1.30 | 3   | 1  | 1.13  | 1.39  |
| <i>Matr3</i>    | matrin-3                                                     | 18  | 4  | 0.99  | 1.03 | 17  | 4  | 0.86  | 0.86  |
| <i>Mavs</i>     | mitochondrial antiviral-signaling protein                    | 1   | 1  | 0.83  | 0.86 | 1   | 1  | 1.45  | 1.30  |
| <i>Mccc1</i>    | methylcrotonoyl-CoA carboxylase subunit alpha, mitochondrial | 3   | 2  | 0.77  | 0.92 | ND  | ND | ND    | ND    |
| <i>Mccc2</i>    | methylcrotonoyl-CoA carboxylase beta chain, mitochondrial    | 2   | 1  | 0.96  | 0.99 | 1   | 1  | 0.92  | 1.06  |
| <i>Mcm2</i>     | DNA replication licensing factor MCM2                        | 8   | 2  | 0.99  | 0.82 | 5   | 2  | 1.14  | 1.03  |
| <i>Mcm3</i>     | DNA replication licensing factor MCM3                        | 7   | 3  | 1.79  | 1.69 | 3   | 1  | 1.21  | 1.42  |
| <i>Mcm4</i>     | DNA replication licensing factor MCM4                        | 1   | 1  | 1.06  | 0.70 | ND  | ND | ND    | ND    |
| <i>Mcm5</i>     | DNA replication licensing factor MCM5                        | 4   | 1  | 0.97  | 0.86 | 1   | 1  | 1.04  | 0.93  |
| <i>Mcm7</i>     | DNA replication licensing factor MCM7                        | 2   | 1  | 0.01  | 1.40 | 5   | 2  | 1.15  | 0.93  |
| <i>Mdh1</i>     | malate dehydrogenase, cytoplasmic                            | 59  | 5  | 1.09  | 1.06 | 36  | 4  | 0.96  | 1.07  |
| <i>Mdh2</i>     | malate dehydrogenase 2, NAD (mitochondrial)                  | 126 | 10 | 1.00  | 0.98 | 120 | 9  | 1.00  | 0.98  |
| <i>Mdp1</i>     | Magnesium-dependent phosphatase 1                            | 2   | 1  | 1.17  | 0.91 | ND  | ND | ND    | ND    |
| <i>Memo1</i>    | protein MEMO1                                                | 3   | 1  | 1.22  | 0.97 | ND  | ND | ND    | ND    |
| <i>Metap2</i>   | methionine aminopeptidase 2                                  | 3   | 2  | 1.01  | 1.01 | ND  | ND | ND    | ND    |

|                 |                                                      |    |    |      |       |    |    |      |      |
|-----------------|------------------------------------------------------|----|----|------|-------|----|----|------|------|
| <i>Mettl7a1</i> | methyltransferase like 7A1                           | 5  | 3  | 1.14 | 1.10  | 2  | 2  | 1.04 | 1.00 |
| <i>Mgea5</i>    | Bifunctional protein NCOAT                           | 2  | 1  | 0.69 | 0.84  | 2  | 1  | 1.25 | 1.15 |
| <i>Mgst3</i>    | Microsomal glutathione S-transferase 3               | 3  | 1  | 1.45 | 1.73  | ND | ND | ND   | ND   |
| <i>Micall1</i>  | MICAL-like protein 1                                 | 2  | 1  | 0.83 | 1.13  | ND | ND | ND   | ND   |
| <i>Mif</i>      | macrophage migration inhibitory factor               | 24 | 2  | 1.61 | 1.60  | 17 | 2  | 1.48 | 1.51 |
| <i>Mink1</i>    | Misshapen-like kinase 1 isoform 1                    | 1  | 1  | 0.51 | 0.43  | ND | ND | ND   | ND   |
| <i>Mlec</i>     | malectin                                             | 4  | 1  | 1.33 | 1.09  | 5  | 1  | 1.31 | 1.10 |
| <i>Mlf2</i>     | myeloid leukemia factor 2 homolog                    | 3  | 1  | 1.22 | 11.50 | ND | ND | ND   | ND   |
| <i>Mllt4</i>    | Afadin                                               | 37 | 7  | 0.96 | 1.06  | 35 | 7  | 0.97 | 1.06 |
| <i>Mme</i>      | neprilysin                                           | 2  | 1  | 0.96 | 1.13  | 3  | 1  | 0.72 | 1.13 |
| <i>Mmp2</i>     | 72 kDa type IV collagenase                           | 14 | 3  | 1.74 | 1.70  | 16 | 3  | 1.16 | 1.39 |
| <i>Mobkl1b</i>  | meps one binder kinase activator-like 1B             | 2  | 1  | 1.08 | 0.89  | 6  | 1  | 1.16 | 0.98 |
| <i>Mobkl3</i>   | meps one binder kinase activator-like 3              | 1  | 1  | 1.42 | 1.35  | ND | ND | ND   | ND   |
| <i>Mocs3</i>    | adenylyltransferase and sulfurtransferase MOCS3      | 4  | 1  | 0.81 | 0.77  | 7  | 1  | 1.14 | 1.14 |
| <i>Mosc2</i>    | MOSC domain-containing protein 2, mitochondrial      | 10 | 1  | 2.34 | 2.21  | 8  | 1  | 2.29 | 2.32 |
| <i>Mpp5</i>     | MAGUK p55 subfamily member 5                         | 2  | 1  | 0.97 | 0.89  | ND | ND | ND   | ND   |
| <i>Mpp6</i>     | MAGUK p55 subfamily member 6 isoform b               | 1  | 1  | 0.91 | 0.93  | ND | ND | ND   | ND   |
| <i>Mprlp</i>    | myosin phosphatase Rho-interacting protein isoform 2 | 2  | 1  | 0.72 | 0.85  | ND | ND | ND   | ND   |
| <i>Mrc2</i>     | C-type mannose receptor 2                            | 9  | 2  | 0.98 | 0.97  | 4  | 2  | 0.85 | 0.87 |
| <i>Mri1</i>     | methylthioribose-1-phosphate isomerase               | 2  | 1  | 1.47 | 1.32  | 1  | 1  | 0.99 | 0.94 |
| <i>Msh2</i>     | DNA mismatch repair protein Msh2                     | 2  | 1  | 0.98 | 1.01  | ND | ND | ND   | ND   |
| <i>Msi2</i>     | RNA-binding protein Musashi homolog 2                | 5  | 2  | 1.09 | 1.03  | ND | ND | ND   | ND   |
| <i>Msn</i>      | moesin                                               | 39 | 5  | ND   | ND    | ND | ND | ND   | ND   |
| <i>Mt2</i>      | metallothionein-2                                    | 4  | 1  | 5.95 | 5.93  | 4  | 1  | 5.75 | 5.67 |
| <i>Mta2</i>     | metastasis-associated protein MTA2                   | 2  | 1  | 0.95 | 0.91  | ND | ND | ND   | ND   |
| <i>Mtap</i>     | S-methyl-5'-thioadenosine phosphorylase              | 7  | 1  | 0.86 | 0.89  | 12 | 1  | 0.91 | 0.94 |
| <i>Mtap4</i>    | Microtubule-associated protein 4                     | 12 | 6  | 1.00 | 1.06  | 22 | 6  | 1.03 | 0.95 |
| <i>Mtap7</i>    | Enscosin                                             | 1  | 1  | 0.78 | 1.16  | ND | ND | ND   | ND   |
| <i>Mtch1</i>    | mitochondrial carrier homolog 1                      | 2  | 1  | 0.98 | 1.09  | 2  | 1  | 1.16 | 1.28 |
| <i>Mtch2</i>    | mitochondrial carrier homolog 2                      | 4  | 2  | 0.99 | 1.26  | 2  | 1  | 0.99 | 1.24 |
| <i>Mtdh</i>     | protein LYRIC                                        | 5  | 1  | 0.94 | 1.00  | 9  | 2  | 0.98 | 0.99 |
| <i>Mthfd1</i>   | C-1-tetrahydrofolate synthase, cytoplasmic           | 15 | 10 | 1.04 | 1.02  | 13 | 8  | 0.94 | 1.09 |
| <i>Mtor</i>     | serine/threonine-protein kinase mTOR                 | 2  | 1  | 1.86 | 1.74  | ND | ND | ND   | ND   |
| <i>Mtpn</i>     | myotrophin                                           | 24 | 1  | 1.14 | 1.16  | 22 | 1  | 0.94 | 1.06 |

|                |                                                                |     |    |      |       |     |    |      |       |
|----------------|----------------------------------------------------------------|-----|----|------|-------|-----|----|------|-------|
| <i>Mtr</i>     | Methionine synthase                                            | 7   | 1  | 2.44 | 11.77 | 6   | 1  | 3.12 | 14.94 |
| <i>Muc4</i>    | Mucin-4                                                        | 42  | 6  | 0.79 | 0.82  | 38  | 6  | 0.76 | 0.81  |
| <i>Mug1</i>    | murinoglobulin-1                                               | 10  | 3  | 1.18 | 0.83  | 8   | 4  | 1.17 | 0.86  |
| <i>Mut</i>     | Methylmalonyl-CoA mutase, mitochondrial                        | 2   | 1  | 1.00 | 1.09  | ND  | ND | ND   | ND    |
| <i>Mutyh</i>   | a/G-specific adenine DNA glycosylase                           | 3   | 1  | 1.03 | 0.85  | 2   | 1  | 0.93 | 0.93  |
| <i>Mvp</i>     | major vault protein                                            | 57  | 14 | 1.02 | 1.04  | 43  | 11 | 1.02 | 1.02  |
| <i>Mxra7</i>   | matrix-remodeling-associated protein 7                         | 19  | 3  | 1.05 | 0.87  | 19  | 3  | 0.95 | 0.96  |
| <i>Myadm</i>   | Myeloid-associated differentiation marker                      | 1   | 1  | 1.33 | 1.47  | ND  | ND | ND   | ND    |
| <i>Mybbp1a</i> | myb-binding protein 1A                                         | 1   | 1  | 1.15 | 1.06  | 5   | 2  | 1.41 | 1.13  |
| <i>Myg1</i>    | Melanocyte proliferating gene 1                                | 3   | 1  | 0.94 | 1.12  | ND  | ND | ND   | ND    |
| <i>Myh10</i>   | myosin-10                                                      | 21  | 4  | ND   | ND    | 31  | 3  | 0.85 | 0.11  |
| <i>Myh14</i>   | myosin-14                                                      | 337 | 45 | 0.90 | 0.97  | 292 | 33 | 0.92 | 1.00  |
| <i>Myh9</i>    | Myosin-9 isoform 1                                             | 461 | 35 | 0.94 | 0.97  | 408 | 29 | 0.92 | 0.95  |
| <i>My112b</i>  | myosin regulatory light chain 12B                              | 118 | 7  | 0.91 | 0.96  | 128 | 7  | 1.00 | 1.12  |
| <i>My16</i>    | myosin light polypeptide 6                                     | 72  | 5  | 1.00 | 1.00  | 59  | 5  | 1.03 | 1.08  |
| <i>Myo15</i>   | Myosin-XV isoform 2a                                           | 18  | 1  | 1.13 | 1.08  | 15  | 1  | 1.11 | 1.13  |
| <i>Myo18a</i>  | myosin-XVIIIa                                                  | 6   | 3  | 1.14 | 1.28  | ND  | ND | ND   | ND    |
| <i>Myo1c</i>   | Myosin-Ic isoform b                                            | 16  | 4  | 1.26 | 1.25  | 2   | 2  | 1.16 | 1.19  |
| <i>Myo1e</i>   | myosin IE                                                      | 1   | 1  | 1.19 | 0.97  | ND  | ND | ND   | ND    |
| <i>Myo6</i>    | myosin-VI                                                      | 24  | 10 | 0.97 | 1.02  | 19  | 7  | 0.94 | 0.90  |
| <i>Myoc</i>    | myocilin                                                       | 1   | 1  | 1.02 | 0.91  | ND  | ND | ND   | ND    |
| <i>Myof</i>    | Myoferlin                                                      | 12  | 6  | 1.08 | 1.15  | 12  | 5  | 1.07 | 1.11  |
| <i>Naa15</i>   | NMDA receptor-regulated protein 1                              | 7   | 1  | 1.17 | 1.14  | 4   | 2  | 1.35 | 1.28  |
| <i>Naa38</i>   | U6 snRNA-associated Sm-like protein LSm8                       | 3   | 1  | 1.05 | 1.20  | 2   | 1  | 0.90 | 1.13  |
| <i>Naca</i>    | nascent polypeptide-associated complex subunit alpha isoform 1 | 60  | 3  | 0.95 | 0.74  | 44  | 3  | 0.97 | 0.72  |
| <i>Nacad</i>   | NAC-alpha domain-containing protein 1                          | 2   | 1  | ND   | ND    | 3   | 1  | 1.55 | 0.71  |
| <i>Nae1</i>    | NEDD8-activating enzyme E1 regulatory subunit                  | 2   | 2  | 1.16 | 1.23  | ND  | ND | ND   | ND    |
| <i>Naga</i>    | Alpha-N-acetylgalactosaminidase                                | 2   | 1  | 0.93 | 1.05  | 2   | 1  | 0.99 | 0.86  |
| <i>Nagk</i>    | N-acetyl-D-glucosamine kinase isoform 1                        | 1   | 1  | 1.01 | 1.12  | 2   | 1  | 0.98 | 1.10  |
| <i>Nans</i>    | N-acetylneuraminic acid synthase                               | 1   | 1  | 0.81 | 0.80  | ND  | ND | ND   | ND    |
| <i>Nap111</i>  | nucleosome assembly protein 1-like 1 isoform 2                 | 3   | 2  | 1.24 | 0.91  | ND  | ND | ND   | ND    |
| <i>Nap114</i>  | nucleosome assembly protein 1-like 4                           | 9   | 3  | 0.94 | 1.13  | 13  | 3  | 1.02 | 1.21  |
| <i>Napa</i>    | Alpha-soluble NSF attachment protein                           | 7   | 3  | 1.02 | 0.95  | 6   | 2  | 1.34 | 1.06  |
| <i>Napg</i>    | Gamma-soluble NSF attachment protein                           | 3   | 1  | 0.80 | 1.05  | ND  | ND | ND   | ND    |



|                |                                                              |    |    |      |      |    |    |      |      |
|----------------|--------------------------------------------------------------|----|----|------|------|----|----|------|------|
| <i>Naprt1</i>  | nicotinate phosphoribosyltransferase                         | 9  | 4  | 0.95 | 1.02 | 13 | 5  | 0.92 | 1.05 |
| <i>Nars</i>    | asparaginyl-tRNA synthetase, cytoplasmic isoform 2           | 26 | 7  | 1.26 | 1.24 | 12 | 3  | 1.16 | 1.05 |
| <i>Nasp</i>    | Nuclear autoantigenic sperm protein isoform 1                | 1  | 1  | 0.88 | 1.03 | ND | ND | ND   | ND   |
| <i>Nbeal2</i>  | neurobeachin-like protein 2                                  | 2  | 2  | 1.73 | 1.73 | ND | ND | ND   | ND   |
| <i>Ncbp1</i>   | Nuclear cap-binding protein subunit 1                        | 2  | 1  | 1.43 | 1.21 | 1  | 1  | 2.03 | 1.47 |
| <i>Nccrp1</i>  | Non-specific cytotoxic cell receptor protein 1 homolog       | 50 | 6  | 1.02 | 1.20 | 54 | 6  | 0.93 | 1.15 |
| <i>Nckap1</i>  | nck-associated protein 1                                     | 8  | 3  | 1.23 | 1.28 | 11 | 4  | 1.12 | 1.28 |
| <i>Ncl</i>     | nucleolin                                                    | 66 | 11 | 0.98 | 1.01 | 39 | 9  | 0.97 | 0.94 |
| <i>Ncstn</i>   | nicastrin                                                    | 1  | 1  | 0.01 | 1.38 | ND | ND | ND   | ND   |
| <i>ND3</i>     | NADH dehydrogenase subunit 3 [Mus terricolor]                | 1  | 1  | 1.28 | 1.04 | ND | ND | ND   | ND   |
| <i>ND4</i>     | NADH dehydrogenase subunit 4 [Mus musculus musculus]         | 1  | 1  | 1.50 | 1.36 | ND | ND | ND   | ND   |
| <i>Ndufa12</i> | NADH dehydrogenase [ubiquinone] 1 alpha subcomplex subu      | 6  | 1  | 1.14 | 0.73 | 3  | 1  | 1.04 | 0.84 |
| <i>Ndufa13</i> | NADH dehydrogenase [ubiquinone] 1 alpha subcomplex subu      | 1  | 1  | 1.36 | 1.35 | 2  | 2  | 0.94 | 0.99 |
| <i>Ndufa2</i>  | NADH dehydrogenase [ubiquinone] 1 alpha subcomplex subu      | 1  | 1  | 1.17 | 1.13 | 1  | 1  | 0.98 | 1.07 |
| <i>Ndufa4</i>  | NADH dehydrogenase [ubiquinone] 1 alpha subcomplex subu      | 15 | 2  | 1.03 | 1.01 | 14 | 2  | 1.02 | 0.99 |
| <i>Ndufa9</i>  | NADH dehydrogenase [ubiquinone] 1 alpha subcomplex subu      | 1  | 1  | 0.90 | 1.06 | 1  | 1  | 0.96 | 1.00 |
| <i>Ndufb10</i> | NADH dehydrogenase [ubiquinone] 1 beta subcomplex subur      | 7  | 2  | 1.09 | 1.13 | 8  | 4  | 1.02 | 1.01 |
| <i>Ndufb6</i>  | NADH dehydrogenase [ubiquinone] 1 beta subcomplex subur      | 2  | 1  | 1.53 | 4.55 | 1  | 1  | 1.52 | 3.34 |
| <i>Ndufb7</i>  | NADH dehydrogenase [ubiquinone] 1 beta subcomplex subur      | 3  | 2  | 1.07 | 1.04 | 1  | 1  | 0.90 | 1.03 |
| <i>Ndufs1</i>  | NADH-ubiquinone oxidoreductase 75 kDa subunit, mitochond     | 23 | 4  | 0.98 | 0.87 | 15 | 4  | 0.79 | 0.77 |
| <i>Ndufs2</i>  | NADH dehydrogenase [ubiquinone] iron-sulfur protein 2, mito  | 1  | 1  | 0.90 | 1.04 | 3  | 1  | 0.74 | 0.75 |
| <i>Ndufs3</i>  | NADH dehydrogenase [ubiquinone] iron-sulfur protein 3, mito  | 9  | 3  | 0.91 | 0.96 | ND | ND | ND   | ND   |
| <i>Ndufv2</i>  | NADH dehydrogenase [ubiquinone] flavoprotein 2, mitochond    | 5  | 2  | 0.99 | 0.97 | 4  | 1  | 0.91 | 0.97 |
| <i>Nebi</i>    | nebulette                                                    | 2  | 1  | 1.37 | 1.19 | ND | ND | ND   | ND   |
| <i>Necap2</i>  | Adaptin ear-binding coat-associated protein 2                | 9  | 3  | 1.01 | 0.85 | 18 | 3  | 0.93 | 0.83 |
| <i>Nedd4</i>   | E3 ubiquitin-protein ligase NEDD4                            | 30 | 7  | 1.10 | 1.02 | 13 | 3  | 1.18 | 1.18 |
| <i>Nedd8</i>   | NEDD8                                                        | 4  | 1  | 0.93 | 1.15 | 2  | 1  | 0.87 | 1.46 |
| <i>Nes</i>     | nestin                                                       | 8  | 1  | 1.32 | 2.00 | 10 | 1  | 1.33 | 1.94 |
| <i>Nfatc2</i>  | nuclear factor of activated T-cells, cytoplasmic 2 isoform d | 9  | 2  | 1.19 | 0.87 | 4  | 2  | 1.47 | 1.09 |
| <i>Ngef</i>    | Ephexin-1 isoform 2                                          | 2  | 1  | ND   | ND   | ND | ND | ND   | ND   |
| <i>Nhp2</i>    | H/ACA ribonucleoprotein complex subunit 2                    | 9  | 1  | 1.20 | 1.17 | 7  | 1  | 1.38 | 1.38 |
| <i>Nid1</i>    | nidogen-1                                                    | 40 | 9  | 1.40 | 1.79 | 21 | 6  | 1.41 | 1.93 |
| <i>Nid2</i>    | nidogen 2                                                    | 7  | 2  | 1.71 | 2.16 | 1  | 1  | 1.88 | 2.11 |
| <i>Nif3l1</i>  | NIF3-like protein 1                                          | 2  | 1  | 0.94 | 0.95 | ND | ND | ND   | ND   |

|               |                                                              |    |    |      |      |    |    |      |      |
|---------------|--------------------------------------------------------------|----|----|------|------|----|----|------|------|
| <i>Nit1</i>   | nitrilase homolog 1                                          | 3  | 1  | 1.13 | 1.22 | 1  | 1  | 1.22 | 1.31 |
| <i>Nit2</i>   | Omega-amidase NIT2                                           | 5  | 2  | 0.93 | 0.88 | ND | ND | ND   | ND   |
| <i>Nkx3-2</i> | Homeobox protein Nkx-3.2                                     | 1  | 1  | 0.89 | 0.90 | ND | ND | ND   | ND   |
| <i>Nme2</i>   | nucleoside diphosphate kinase B                              | 19 | 2  | 1.67 | 1.38 | 20 | 2  | 1.56 | 1.01 |
| <i>Nmi</i>    | N-myc-interactor                                             | 3  | 1  | 0.62 | 0.69 | 3  | 1  | 0.71 | 0.82 |
| <i>Nmt1</i>   | glycylpeptide N-tetradecanoyltransferase 1                   | 1  | 1  | 1.52 | 1.62 | ND | ND | ND   | ND   |
| <i>Nolc1</i>  | nucleolar and coiled-body phosphoprotein 1 isoform B         | 1  | 1  | 1.10 | 0.88 | ND | ND | ND   | ND   |
| <i>Nono</i>   | non-POU domain-containing octamer-binding protein            | 23 | 4  | 0.92 | 0.89 | 11 | 2  | 0.84 | 0.99 |
| <i>Nop56</i>  | Nucleolar protein 56                                         | 15 | 3  | 1.03 | 0.99 | 7  | 2  | 1.08 | 1.05 |
| <i>Nop58</i>  | Nucleolar protein 58                                         | 8  | 2  | 1.04 | 1.00 | 7  | 1  | 0.95 | 0.82 |
| <i>Npc2</i>   | Epididymal secretory protein E1                              | 1  | 1  | 1.15 | 1.31 | ND | ND | ND   | ND   |
| <i>Npepps</i> | aminopeptidase puromycin sensitive                           | 52 | 12 | 1.01 | 1.00 | 34 | 7  | 0.94 | 1.09 |
| <i>Nploc4</i> | nuclear protein localization protein 4 homolog               | 5  | 1  | 0.87 | 0.98 | ND | ND | ND   | ND   |
| <i>Npnt</i>   | nephronectin isoform b                                       | 14 | 3  | 2.21 | 5.05 | 14 | 3  | 1.51 | 3.20 |
| <i>Nptn</i>   | Neuroplastin                                                 | 3  | 1  | 0.87 | 1.03 | 1  | 1  | 1.02 | 1.24 |
| <i>Nqo1</i>   | NAD(P)H dehydrogenase [quinone] 1                            | 13 | 1  | 0.92 | 0.93 | 6  | 2  | 1.12 | 1.07 |
| <i>Nqo2</i>   | ribosyldihyronicotinamide dehydrogenase isoform 2            | 3  | 1  | 1.06 | 1.00 | 1  | 1  | 0.99 | 1.04 |
| <i>Nrap</i>   | Nebulin-related-anchoring protein isoform C                  | 1  | 1  | ND   | ND   | ND | ND | ND   | ND   |
| <i>Nras</i>   | GTPase NRas                                                  | 3  | 2  | 0.99 | 0.94 | 3  | 1  | 0.95 | 0.90 |
| <i>Nsdhl</i>  | sterol-4-alpha-carboxylate 3-dehydrogenase, decarboxylating  | 9  | 1  | 1.14 | 0.96 | 6  | 1  | 1.08 | 0.89 |
| <i>Nsf</i>    | vesicle-fusing ATPase                                        | 1  | 1  | 1.01 | 0.98 | 1  | 1  | 0.85 | 1.03 |
| <i>Nsfl1c</i> | NSFL1 cofactor p47                                           | 35 | 6  | 1.02 | 0.93 | 21 | 4  | 0.91 | 0.95 |
| <i>Nsun2</i>  | tRNA (cytosine-5-)-methyltransferase NSUN2                   | 4  | 2  | 1.37 | 0.75 | ND | ND | ND   | ND   |
| <i>Ntocr</i>  | Nucleoside-triphosphatase C1orf57 homolog                    | 2  | 1  | 0.21 | 0.66 | ND | ND | ND   | ND   |
| <i>Nub1</i>   | NEDD8 ultimate buster 1                                      | 3  | 1  | 0.17 | 0.22 | ND | ND | ND   | ND   |
| <i>Nucb1</i>  | nucleobindin-1 isoform 1                                     | 11 | 4  | 0.89 | 0.89 | 9  | 4  | 0.85 | 0.90 |
| <i>Nucb2</i>  | Nucleobindin-2 isoform 2                                     | 5  | 2  | 1.03 | 1.00 | 4  | 2  | 1.04 | 1.01 |
| <i>Nucks1</i> | nuclear ubiquitous casein and cyclin-dependent kinases subs  | 1  | 1  | 1.31 | 1.35 |    |    | ND   | ND   |
| <i>Nudt19</i> | nucleoside diphosphate-linked moiety X motif 19, mitochondri | 8  | 1  | ND   | ND   | 7  | 1  | 0.00 | 0.00 |
| <i>Nudt4</i>  | diphosphoinositol polyphosphate phosphohydrolase 2           | 1  | 1  | 1.13 | 1.05 | 4  | 2  | 0.96 | 1.06 |
| <i>Numa1</i>  | nuclear mitotic apparatus protein 1                          | 2  | 2  | 0.85 | 1.03 | 1  | 1  | 0.81 | 1.36 |
| <i>Nup107</i> | nuclear pore complex protein Nup107                          | 1  | 1  | 1.13 | 1.18 | ND | ND | ND   | ND   |
| <i>Nup155</i> | Nuclear pore complex protein Nup155                          | 1  | 1  | 0.92 | 0.86 | ND | ND | ND   | ND   |
| <i>Nup205</i> | nucleoporin 205                                              | 3  | 1  | 1.52 | 1.41 | ND | ND | ND   | ND   |

|                 |                                                               |     |   |      |      |     |    |      |      |
|-----------------|---------------------------------------------------------------|-----|---|------|------|-----|----|------|------|
| <i>Nup214</i>   | Nuclear pore complex protein Nup214                           | 3   | 2 | 0.94 | 0.95 | 1   | 1  | 0.89 | 1.09 |
| <i>Nup93</i>    | nuclear pore complex protein Nup93                            | 6   | 3 | 1.16 | 1.15 | 2   | 1  | 1.17 | 1.32 |
| <i>Nup98</i>    | nucleoporin 98                                                | 2   | 1 | 1.06 | 1.31 | ND  | ND | ND   | ND   |
| <i>Nupl1</i>    | nucleoporin p58/p45                                           | 2   | 1 | 0.76 | 1.01 | ND  | ND | ND   | ND   |
| <i>Oat</i>      | ornithine aminotransferase, mitochondrial                     | 69  | 8 | 0.99 | 0.92 | 90  | 8  | 0.97 | 0.95 |
| <i>Obp1a</i>    | odorant binding protein 1a                                    | 2   | 1 | 1.04 | 1.27 | ND  | ND | ND   | ND   |
| <i>Obsl1</i>    | obscurin-like 1                                               | 9   | 2 | ND   | ND   | ND  | ND | ND   | ND   |
| <i>Ogdh</i>     | 2-oxoglutarate dehydrogenase, mitochondrial                   | 4   | 2 | 1.01 | 1.08 | 7   | 3  | 0.92 | 0.97 |
| <i>Ogfr</i>     | opioid growth factor receptor                                 | 1   | 1 | 1.05 | 1.10 | ND  | ND | ND   | ND   |
| <i>Ogn</i>      | osteoglycin                                                   | 175 | 9 | 0.99 | 0.78 | 136 | 9  | 1.01 | 0.79 |
| <i>Ola1</i>     | obg-like ATPase 1 isoform a                                   | 10  | 3 | 0.93 | 0.82 | ND  | ND | ND   | ND   |
| <i>Ola1</i>     | obg-like ATPase 1 isoform b                                   | 16  | 1 | 0.88 | 0.92 | ND  | ND | ND   | ND   |
| <i>Olfml3</i>   | olfactomedin-like protein 3                                   | 75  | 8 | 1.07 | 0.83 | 64  | 8  | 1.10 | 0.99 |
| <i>Olf1351</i>  | olfactory receptor 1351                                       | 1   | 1 | ND   | ND   | ND  | ND | ND   | ND   |
| <i>Olf1937</i>  | olfactory receptor 937                                        | 1   | 1 | 2.00 | 1.73 | ND  | ND | ND   | ND   |
| <i>Oplah</i>    | 5-oxoprolinase                                                | 6   | 2 | 0.91 | 0.54 | ND  | ND | ND   | ND   |
| <i>Osbp</i>     | Oxysterol-binding protein 1                                   | 3   | 1 | 1.75 | 2.03 | ND  | ND | ND   | ND   |
| <i>Osbp10</i>   | oxysterol-binding protein-like protein 10                     | 1   | 1 | 1.18 | 1.24 | ND  | ND | ND   | ND   |
| <i>Osbp8</i>    | oxysterol-binding protein-like protein 8 isoform b            | 1   | 1 | 0.71 | 0.93 | ND  | ND | ND   | ND   |
| <i>Osbp9</i>    | oxysterol-binding protein-related protein 9 isoform c         | 3   | 1 | 1.05 | 1.01 | 1   | 1  | 1.03 | 1.04 |
| <i>Osgep</i>    | probable O-sialoglycoprotein endopeptidase                    | 6   | 1 | 0.94 | 1.04 | 2   | 1  | 1.04 | 1.30 |
| <i>Ostc</i>     | Oligosaccharyltransferase complex subunit OSTC                | 2   | 1 | 1.51 | 0.89 | ND  | ND | ND   | ND   |
| <i>Ostf1</i>    | osteoclast-stimulating factor 1                               | 10  | 3 | 1.13 | 0.88 | 11  | 2  | 1.27 | 0.95 |
| <i>Oxct1</i>    | succinyl-CoA:3-ketoacid-coenzyme A transferase 1, mitochondr  | 16  | 4 | 0.93 | 0.91 | 7   | 2  | 0.88 | 0.81 |
| <i>Oxr1</i>     | oxidation resistance protein 1 isoform B                      | 29  | 7 | 1.00 | 0.96 | 22  | 7  | 1.02 | 0.86 |
| <i>Oxsr1</i>    | Serine/threonine-protein kinase OSR1                          | 12  | 2 | 0.82 | 0.86 | 8   | 1  | 0.97 | 1.04 |
| <i>P4hb</i>     | protein disulfide-isomerase                                   | 87  | 9 | 0.86 | 0.87 | 61  | 5  | 0.82 | 0.85 |
| <i>Pa2g4</i>    | proliferation-associated protein 2G4                          | 15  | 3 | 0.99 | 0.79 | 8   | 5  | 0.96 | 0.90 |
| <i>Pabpc1</i>   | polyadenylate-binding protein 1                               | 75  | 9 | 0.87 | 0.82 | 69  | 7  | 0.89 | 0.82 |
| <i>Pabpn1</i>   | polyadenylate-binding protein 2                               | 2   | 1 | 0.84 | 0.77 | ND  | ND | ND   | ND   |
| <i>Paccin2</i>  | protein kinase C and casein kinase substrate in neurons prote | 1   | 1 | 1.16 | 1.25 | ND  | ND | ND   | ND   |
| <i>Paccin3</i>  | Protein kinase C and casein kinase II substrate protein 3     | 2   | 1 | 0.95 | 1.00 | 2   | 1  | 1.08 | 1.06 |
| <i>Padi4</i>    | Protein-arginine deiminase type-4                             | 27  | 7 | 0.93 | 0.95 | 17  | 5  | 0.88 | 0.96 |
| <i>Pafah1b1</i> | platelet-activating factor acetylhydrolase IB subunit alpha   | 5   | 2 | 0.92 | 1.08 | ND  | ND | ND   | ND   |

|                 |                                                                      |     |   |       |      |     |    |      |      |
|-----------------|----------------------------------------------------------------------|-----|---|-------|------|-----|----|------|------|
| <i>Pafah1b2</i> | platelet-activating factor acetylhydrolase IB subunit beta           | 20  | 1 | 0.90  | 0.88 | 12  | 1  | 0.93 | 0.93 |
| <i>Pafah1b3</i> | platelet-activating factor acetylhydrolase IB subunit gamma          | 22  | 1 | 0.93  | 0.97 | 14  | 1  | 0.91 | 0.94 |
| <i>Paics</i>    | Multifunctional protein ADE2                                         | 30  | 5 | 0.99  | 1.10 | 20  | 5  | 0.92 | 1.13 |
| <i>Pak1</i>     | Serine/threonine-protein kinase PAK 1                                | 23  | 4 | 0.96  | 0.92 | 16  | 3  | 1.06 | 1.10 |
| <i>Pak2</i>     | serine/threonine-protein kinase PAK 2                                | 16  | 4 | 1.06  | 1.44 | ND  | ND | ND   | ND   |
| <i>Palld</i>    | Palladin                                                             | 1   | 1 | 0.99  | 0.93 | ND  | ND | ND   | ND   |
| <i>Papln</i>    | Papilin                                                              | 4   | 1 | 1.29  | 1.37 | 3   | 2  | 1.49 | 1.50 |
| <i>Papss1</i>   | bifunctional 3'-phosphoadenosine 5'-phosphosulfate synthase          | 3   | 2 | 1.02  | 0.87 | 3   | 2  | 1.06 | 1.01 |
| <i>Pard3</i>    | partitioning defective 3 homolog isoform 2                           | 1   | 1 | 1.69  | 0.87 | ND  | ND | ND   | ND   |
| <i>Park7</i>    | protein DJ-1                                                         | 87  | 5 | 0.99  | 1.08 | 74  | 4  | 1.22 | 1.34 |
| <i>Parp1</i>    | poly [ADP-ribose] polymerase 1                                       | 11  | 5 | 0.92  | 1.23 | 8   | 1  | 0.97 | 0.90 |
| <i>Parp12</i>   | poly [ADP-ribose] polymerase 12                                      | 3   | 1 | 0.96  | 1.00 | ND  | ND | ND   | ND   |
| <i>Parp4</i>    | poly (ADP-ribose) polymerase family, member 4                        | 1   | 1 | 0.81  | 0.88 | ND  | ND | ND   | ND   |
| <i>Parva</i>    | alpha-parvin                                                         | 2   | 1 | 0.89  | 0.92 | 1   | 1  | 0.86 | 0.87 |
| <i>Pawr</i>     | PRKC apoptosis WT1 regulator protein                                 | 1   | 1 | 1.17  | 1.01 | ND  | ND | ND   | ND   |
| <i>Pax6</i>     | paired box protein Pax-6                                             | 2   | 1 | 1.16  | 0.74 | ND  | ND | ND   | ND   |
| <i>Pcbp1</i>    | poly(rC)-binding protein 1                                           | 115 | 8 | 0.89  | 0.94 | 105 | 8  | 0.87 | 1.01 |
| <i>Pcbp2</i>    | Poly(rC)-binding protein 2 isoform 3                                 | 109 | 5 | 0.97  | 0.95 | 65  | 5  | 1.08 | 1.17 |
| <i>Pck2</i>     | phosphoenolpyruvate carboxykinase [GTP], mitochondrial               | 9   | 2 | 0.87  | 0.84 | 5   | 2  | 0.89 | 0.98 |
| <i>Pcmt1</i>    | protein-L-isoaspartate(D-aspartate) O-methyltransferase              | 5   | 2 | 0.98  | 0.98 | 3   | 1  | 0.88 | 1.22 |
| <i>Pcnp</i>     | PEST proteolytic signal-containing nuclear protein                   | 3   | 1 | 0.86  | 1.02 | 2   | 1  | 0.83 | 1.06 |
| <i>Pcolce</i>   | Procollagen C-proteinase enhancer protein                            | 178 | 9 | 1.03  | 0.90 | 140 | 8  | 1.01 | 0.88 |
| <i>Pcx</i>      | pyruvate carboxylase isoform 2                                       | 4   | 3 | 1.13  | 0.98 | 1   | 1  | 0.85 | 1.66 |
| <i>Pcyox1</i>   | Prenylcysteine oxidase                                               | 10  | 3 | 1.19  | 0.93 | 5   | 3  | 1.07 | 1.23 |
| <i>Pcyt1a</i>   | choline-phosphate cytidyltransferase A                               | 3   | 2 | 0.88  | 0.74 | ND  | ND | ND   | ND   |
| <i>Pcyt1b</i>   | choline-phosphate cytidyltransferase B isoform 2                     | 2   | 1 | 0.94  | 1.00 | ND  | ND | ND   | ND   |
| <i>Pdap1</i>    | 28 kDa heat- and acid-stable phosphoprotein                          | 2   | 1 | 1.15  | 1.02 | ND  | ND | ND   | ND   |
| <i>Pdcd4</i>    | Programmed cell death protein 4                                      | 33  | 8 | 0.93  | 0.99 | 29  | 6  | 0.87 | 1.03 |
| <i>Pdcd6</i>    | programmed cell death protein 6                                      | 2   | 1 | 1.58  | 1.38 | ND  | ND | ND   | ND   |
| <i>Pdcd6ip</i>  | programmed cell death 6-interacting protein isoform 3                | 24  | 8 | 0.94  | 0.99 | 19  | 6  | 0.98 | 1.08 |
| <i>Pdcl3</i>    | phosducin-like protein 3                                             | 3   | 1 | 1.16  | 1.11 | ND  | ND | ND   | ND   |
| <i>Pde6h</i>    | retinal cone rhodopsin-sensitive cGMP 3',5'-cyclic phosphodiesterase | 3   | 1 | 10.11 | 5.62 | ND  | ND | ND   | ND   |
| <i>Pdha1</i>    | pyruvate dehydrogenase E1 component subunit alpha, somatotrophic     | 24  | 4 | 0.99  | 0.91 | 24  | 3  | 0.99 | 0.97 |
| <i>Pdha2</i>    | pyruvate dehydrogenase E1 component subunit alpha, testis-           | 1   | 1 | ND    | ND   | ND  | ND | ND   | ND   |

|               |                                                              |     |    |      |      |     |    |      |      |
|---------------|--------------------------------------------------------------|-----|----|------|------|-----|----|------|------|
| <i>Pdhb</i>   | pyruvate dehydrogenase E1 component subunit beta, mitochondr | 20  | 4  | 1.10 | 0.95 | 22  | 3  | 1.11 | 0.98 |
| <i>Pdia3</i>  | Protein disulfide-isomerase A3                               | 149 | 15 | 0.90 | 0.82 | 102 | 13 | 0.91 | 0.77 |
| <i>Pdia4</i>  | protein disulfide-isomerase A4                               | 70  | 9  | 0.87 | 0.89 | 64  | 7  | 0.89 | 0.91 |
| <i>Pdia6</i>  | protein disulfide-isomerase A6                               | 79  | 9  | 0.90 | 0.90 | 47  | 6  | 0.90 | 0.94 |
| <i>Pdlim1</i> | PDZ and LIM domain protein 1                                 | 90  | 7  | 1.00 | 0.86 | 78  | 8  | 0.97 | 0.85 |
| <i>Pdlim5</i> | PDZ and LIM domain protein 5 isoform ENH1                    | 30  | 5  | 0.85 | 1.03 | 25  | 4  | 0.97 | 0.94 |
| <i>Pds5a</i>  | Sister chromatid cohesion protein PDS5 homolog A             | 2   | 1  | 0.88 | 0.67 | 2   | 1  | 1.00 | 0.89 |
| <i>Pds5b</i>  | PDS5, regulator of cohesion maintenance, homolog B           | 5   | 2  | 1.08 | 1.07 | 1   | 1  | 1.27 | 1.44 |
| <i>Pdxdc1</i> | pyridoxal-dependent decarboxylase domain-containing protein  | 14  | 4  | 1.05 | 1.05 | 9   | 4  | 0.94 | 0.87 |
| <i>Pdxk</i>   | pyridoxal kinase                                             | 11  | 3  | 0.97 | 1.07 | 12  | 2  | 0.87 | 0.83 |
| <i>Pebp1</i>  | phosphatidylethanolamine-binding protein 1                   | 50  | 4  | 0.86 | 0.97 | 28  | 2  | 0.80 | 0.95 |
| <i>Peo1</i>   | twinkle protein, mitochondrial                               | 1   | 1  | ND   | ND   | ND  | ND | ND   | ND   |
| <i>Pepd</i>   | xaa-Pro dipeptidase                                          | 1   | 1  | 0.74 | 1.01 | ND  | ND | ND   | ND   |
| <i>Pfdn1</i>  | Prefoldin subunit 1                                          | 4   | 1  | 0.96 | 1.01 | ND  | ND | ND   | ND   |
| <i>Pfdn2</i>  | prefoldin subunit 2                                          | 10  | 2  | 1.20 | 1.24 | 11  | 2  | 1.15 | 1.16 |
| <i>Pfdn5</i>  | prefoldin subunit 5                                          | 2   | 1  | ND   | ND   | 3   | 1  | 0.92 | 0.46 |
| <i>Pfkl</i>   | 6-phosphofructokinase, liver type                            | 23  | 4  | 1.23 | 1.53 | 10  | 2  | 1.10 | 1.21 |
| <i>Pfkm</i>   | 6-phosphofructokinase, muscle type                           | 3   | 3  | 0.49 | 1.06 | ND  | ND | ND   | ND   |
| <i>Pfn1</i>   | profilin-1                                                   | 284 | 6  | 1.06 | 1.09 | 231 | 6  | 1.03 | 1.15 |
| <i>Pgam1</i>  | Phosphoglycerate mutase 1                                    | 33  | 4  | 0.86 | 0.91 | 56  | 3  | 1.14 | 1.16 |
| <i>Pgcp</i>   | plasma glutamate carboxypeptidase                            | 3   | 2  | 0.92 | 0.94 | ND  | ND | ND   | ND   |
| <i>Pgd</i>    | 6-Phosphogluconate dehydrogenase, decarboxylating            | 68  | 4  | 1.11 | 1.16 | 68  | 4  | 1.15 | 1.22 |
| <i>Pgk1</i>   | phosphoglycerate kinase 1                                    | 33  | 7  | 1.02 | 0.98 | 49  | 5  | 0.99 | 1.01 |
| <i>Pgls</i>   | 6-Phosphogluconolactonase                                    | 26  | 3  | 1.01 | 0.96 | 21  | 4  | 1.05 | 0.96 |
| <i>Pgm2</i>   | phosphoglucomutase-1                                         | 15  | 5  | 0.97 | 0.97 | 9   | 3  | 0.97 | 1.14 |
| <i>Pgp</i>    | phosphoglycolate phosphatase                                 | 1   | 1  | 1.10 | 0.98 | ND  | ND | ND   | ND   |
| <i>Pgrmc1</i> | membrane-associated progesterone receptor component 1        | 34  | 4  | 0.91 | 0.75 | 21  | 2  | 0.87 | 0.81 |
| <i>Pgrmc2</i> | membrane-associated progesterone receptor component 2        | 8   | 2  | 0.94 | 0.79 | 9   | 2  | 0.89 | 0.86 |
| <i>Phb</i>    | prohibitin                                                   | 15  | 4  | 0.90 | 0.93 | 13  | 4  | 0.88 | 0.93 |
| <i>Phb2</i>   | Prohibitin-2                                                 | 18  | 3  | 0.87 | 0.80 | 4   | 2  | 0.89 | 0.94 |
| <i>Phgdh</i>  | D-3-phosphoglycerate dehydrogenase                           | 68  | 7  | 1.02 | 0.99 | 51  | 5  | 1.00 | 0.95 |
| <i>Phpt1</i>  | 14 kDa phosphohistidine phosphatase                          | 3   | 1  | 3.00 | 2.91 | ND  | ND | ND   | ND   |
| <i>Phyhip</i> | phytanoyl-CoA hydroxylase-interacting protein                | 3   | 1  | 1.01 | 1.10 | 5   | 1  | 0.97 | 1.01 |
| <i>Picalm</i> | phosphatidylinositol-binding clathrin assembly protein       | 6   | 1  | 0.46 | 0.51 | 4   | 1  | 0.91 | 0.66 |

|                 |                                                             |     |    |      |      |     |    |      |      |
|-----------------|-------------------------------------------------------------|-----|----|------|------|-----|----|------|------|
| <i>Pigk</i>     | GPI-anchor transamidase isoform 1                           | 2   | 1  | 0.69 | 0.77 | ND  | ND | ND   | ND   |
| <i>Pin1-ps1</i> | peptidylprolyl cis/trans isomerase, NIMA-interacting 1-like | 8   | 1  | 1.59 | 1.59 | 6   | 1  | 0.90 | 1.16 |
| <i>Pip</i>      | Prolactin-inducible protein homolog                         | 2   | 1  | 0.20 | 1.41 | 3   | 1  | 0.58 | 0.83 |
| <i>Pir</i>      | pirin                                                       | 4   | 1  | 0.62 | 1.16 | 1   | 1  | 0.65 | 0.94 |
| <i>Pitpna</i>   | phosphatidylinositol transfer protein alpha isoform         | 11  | 2  | 0.96 | 1.02 | 4   | 2  | 1.02 | 0.88 |
| <i>Pitpnb</i>   | phosphatidylinositol transfer protein beta isoform          | 2   | 1  | 1.31 | 1.36 | ND  | ND | ND   | ND   |
| <i>Pkm2</i>     | pyruvate kinase isozymes M1/M2                              | 466 | 17 | 0.98 | 0.97 | 454 | 17 | 0.94 | 0.97 |
| <i>Pkp1</i>     | plakophilin-1                                               | 220 | 22 | 0.99 | 0.92 | 174 | 19 | 0.95 | 0.93 |
| <i>Pkp3</i>     | plakophilin-3 isoform 1                                     | 34  | 11 | 1.10 | 1.02 | 18  | 7  | 1.11 | 1.10 |
| <i>Pkp4</i>     | Plakophilin-4 isoform 2                                     | 6   | 1  | 0.88 | 0.90 | 2   | 1  | 0.89 | 0.96 |
| <i>Pla2g4a</i>  | cytosolic phospholipase A2                                  | 2   | 1  | 1.29 | 0.54 | 3   | 2  | 0.85 | 0.88 |
| <i>Pla2g4b</i>  | Cytosolic phospholipase A2 beta                             | 2   | 1  | 1.00 | 1.04 | 1   | 1  | 0.81 | 0.83 |
| <i>Plaa</i>     | Phospholipase A-2-activating protein                        | 1   | 1  | 1.13 | 1.60 | ND  | ND | ND   | ND   |
| <i>Plac8</i>    | placenta-specific gene 8 protein                            | 5   | 1  | 1.13 | 1.22 | 1   | 1  | 1.26 | 1.78 |
| <i>Plcd1</i>    | 1-phosphatidylinositol-4,5-bisphosphate phosphodiesterase d | 35  | 7  | 0.98 | 1.12 | 15  | 3  | 0.90 | 1.25 |
| <i>Plec</i>     | plectin-1 isoform 1d                                        | 313 | 94 | 0.94 | 0.90 | 163 | 56 | 0.96 | 0.91 |
| <i>Plekha6</i>  | pleckstrin homology domain-containing family A member 6 iso | 2   | 1  | 1.59 | 1.03 | 1   | 1  | 1.75 | 1.13 |
| <i>Plin3</i>    | Perilipin-3                                                 | 13  | 4  | 0.89 | 1.04 | 10  | 4  | 0.91 | 1.01 |
| <i>Plod1</i>    | procollagen-lysine,2-oxoglutarate 5-dioxygenase 1           | 1   | 1  | 1.33 | 0.74 | 1   | 1  | 0.97 | 0.91 |
| <i>Plp2</i>     | proteolipid protein 2                                       | 1   | 1  | 0.90 | 0.99 | ND  | ND | ND   | ND   |
| <i>Pls3</i>     | plastin-3                                                   | 49  | 7  | 0.87 | 0.97 | 22  | 4  | 0.93 | 1.04 |
| <i>Plexnb2</i>  | plexin B2                                                   | 10  | 5  | 0.92 | 1.01 | 2   | 2  | 0.75 | 0.90 |
| <i>Pmf1</i>     | Polyamine-modulated factor 1                                | 1   | 1  | 2.05 | 1.88 | ND  | ND | ND   | ND   |
| <i>Pmm2</i>     | phosphomannomutase 2                                        | 2   | 1  | 1.06 | 1.02 | 4   | 2  | 0.96 | 1.09 |
| <i>Pmpcb</i>    | mitochondrial-processing peptidase subunit beta             | 1   | 1  | 1.58 | 0.84 | ND  | ND | ND   | ND   |
| <i>Pnn</i>      | Pinin                                                       | 1   | 1  | 0.91 | 0.98 | ND  | ND | ND   | ND   |
| <i>Podn</i>     | podocan                                                     | 1   | 1  | 1.18 | 1.38 | ND  | ND | ND   | ND   |
| <i>Pof1b</i>    | protein POF1B                                               | 33  | 6  | 0.88 | 1.03 | 34  | 4  | 0.94 | 1.04 |
| <i>Polr2e</i>   | DNA-directed RNA polymerases I, II, and III subunit RPABC1  | 2   | 1  | 0.87 | 0.84 | 3   | 1  | 1.05 | 0.54 |
| <i>Polr2h</i>   | DNA-directed RNA polymerases I, II, and III subunit RPABC3  | 1   | 1  | 1.15 | 0.88 | ND  | ND | ND   | ND   |
| <i>Pon3</i>     | serum paraoxonase/lactonase 3                               | 1   | 1  | 1.12 | 1.09 | ND  | ND | ND   | ND   |
| <i>Por</i>      | NADPH--cytochrome P450 reductase                            | 17  | 5  | 1.01 | 0.89 | 14  | 5  | 0.95 | 0.94 |
| <i>Postn</i>    | periostin                                                   | 2   | 1  | 1.10 | 3.47 | ND  | ND | ND   | ND   |
| <i>Pou5f2</i>   | POU domain, class 5, transcription factor 2                 | 1   | 1  | 5.86 | 2.61 | ND  | ND | ND   | ND   |

|                  |                                                                |     |    |      |      |     |    |      |      |
|------------------|----------------------------------------------------------------|-----|----|------|------|-----|----|------|------|
| <i>Ppa1</i>      | inorganic pyrophosphatase                                      | 56  | 6  | 0.99 | 0.92 | 31  | 4  | 0.99 | 0.94 |
| <i>Ppap2b</i>    | lipid phosphate phosphohydrolase 3                             | 2   | 1  | 1.18 | 1.04 | ND  | ND | ND   | ND   |
| <i>Ppfia4</i>    | protein tyrosine phosphatase, receptor type, f polypeptide (PT | 1   | 1  | 0.70 | 0.80 | ND  | ND | ND   | ND   |
| <i>Ppfibp2</i>   | liprin-beta-2 isoform 1                                        | 2   | 2  | 0.88 | 0.93 | 2   | 2  | 0.86 | 1.24 |
| <i>Ppia</i>      | peptidyl-prolyl cis-trans isomerase A                          | 316 | 6  | 1.08 | 1.05 | 266 | 6  | 1.11 | 1.06 |
| <i>Ppib</i>      | peptidyl-prolyl cis-trans isomerase B                          | 50  | 4  | 0.97 | 0.67 | 45  | 4  | 0.98 | 0.71 |
| <i>Ppic</i>      | peptidyl-prolyl cis-trans isomerase C                          | 2   | 1  | 1.02 | 0.78 | 5   | 1  | 1.03 | 0.80 |
| <i>Ppie</i>      | Peptidyl-prolyl cis-trans isomerase E                          | 1   | 1  | 0.88 | 0.85 | ND  | ND | ND   | ND   |
| <i>Ppl</i>       | Periplakin                                                     | 472 | 45 | 0.87 | 0.89 | 364 | 34 | 0.89 | 0.91 |
| <i>Ppm1b</i>     | protein phosphatase 1B isoform 3                               | 2   | 1  | 1.05 | 1.09 | ND  | ND | ND   | ND   |
| <i>Ppm1g</i>     | protein phosphatase 1G                                         | 1   | 1  | 0.91 | 0.84 | ND  | ND | ND   | ND   |
| <i>Ppme1</i>     | protein phosphatase methylesterase 1                           | 1   | 1  | 0.84 | 1.04 | ND  | ND | ND   | ND   |
| <i>Ppp1ca</i>    | Serine/threonine-protein phosphatase PP1-alpha catalytic sub   | 18  | 4  | 0.97 | 1.03 | 17  | 4  | 1.00 | 0.92 |
| <i>Ppp1cb</i>    | Serine/threonine-protein phosphatase PP1-beta catalytic sub    | 14  | 4  | 0.86 | 1.03 | ND  | ND | ND   | ND   |
| <i>Ppp1r12a</i>  | protein phosphatase 1 regulatory subunit 12A                   | 1   | 1  | 1.15 | 1.58 | ND  | ND | ND   | ND   |
| <i>Ppp1r7</i>    | Protein phosphatase 1 regulatory subunit 7                     | 7   | 2  | 0.92 | 1.13 | 7   | 3  | 1.11 | 0.92 |
| <i>Ppp2ca</i>    | serine/threonine-protein phosphatase 2A catalytic subunit alp  | 47  | 6  | 0.85 | 1.46 | ND  | ND | ND   | ND   |
| <i>Ppp2cb</i>    | serine/threonine-protein phosphatase 2A catalytic subunit bet  | 47  | 6  | 2.32 | 1.18 | ND  | ND | ND   | ND   |
| <i>Ppp2r1a</i>   | serine/threonine-protein phosphatase 2A 65 kDa regulatory su   | 40  | 10 | 1.06 | 1.07 | 25  | 7  | 1.06 | 0.90 |
| <i>Ppp2r4</i>    | serine/threonine-protein phosphatase 2A regulatory subunit B   | 14  | 3  | 0.88 | 0.91 | 5   | 3  | 0.84 | 0.92 |
| <i>Ppp2r5b</i>   | protein phosphatase 2, regulatory subunit B (B56), beta isofor | 7   | 1  | 1.09 | 1.19 | 3   | 1  | 1.16 | 1.04 |
| <i>Ppp2r5e</i>   | serine/threonine-protein phosphatase 2A 56 kDa regulatory su   | 8   | 2  | 1.75 | 1.53 | 3   | 1  | 1.79 | 2.42 |
| <i>Ppp3ca</i>    | serine/threonine-protein phosphatase 2B catalytic subunit alp  | 9   | 3  | 0.81 | 0.91 | ND  | ND | ND   | ND   |
| <i>Ppp3cc</i>    | serine/threonine-protein phosphatase 2B catalytic subunit gar  | 4   | 1  | 0.83 | 0.92 | ND  | ND | ND   | ND   |
| <i>Ppp3r1</i>    | calcineurin subunit B type 1                                   | 2   | 1  | 1.06 | 0.98 | 1   | 1  | 0.83 | 0.76 |
| <i>Ppp4c</i>     | serine/threonine-protein phosphatase 4 catalytic subunit       | 27  | 2  | 1.01 | 0.55 | 16  | 2  | 0.99 | 0.72 |
| <i>Ppp5c</i>     | serine/threonine-protein phosphatase 5                         | 7   | 1  | 0.93 | 1.21 | 4   | 1  | 0.91 | 1.08 |
| <i>Prdx1</i>     | peroxiredoxin-1                                                | 95  | 8  | 0.87 | 0.97 | 77  | 6  | 0.84 | 0.93 |
| <i>Prdx2</i>     | Peroxiredoxin-2                                                | 75  | 6  | 0.93 | 0.95 | 63  | 4  | 1.00 | 0.95 |
| <i>Prdx3</i>     | thioredoxin-dependent peroxide reductase, mitochondrial        | 8   | 3  | 0.99 | 0.57 | 9   | 2  | 0.87 | 0.61 |
| <i>Prdx5</i>     | peroxiredoxin-5, mitochondrial                                 | 152 | 5  | 1.08 | 1.17 | 161 | 5  | 1.06 | 1.23 |
| <i>Prdx6</i>     | peroxiredoxin-6                                                | 256 | 10 | 0.87 | 0.97 | 235 | 10 | 0.87 | 1.00 |
| <i>Prdx6-rs2</i> | PREDICTED: peroxiredoxin 6, related sequence 2                 | 47  | 1  | 1.28 | 1.16 | 55  | 1  | 1.21 | 1.32 |
| <i>Prelp</i>     | prolargin                                                      | 103 | 6  | 1.21 | 1.21 | 94  | 6  | 1.23 | 1.28 |

|                |                                                                     |    |   |      |      |    |    |      |       |
|----------------|---------------------------------------------------------------------|----|---|------|------|----|----|------|-------|
| <i>Prep</i>    | prolyl endopeptidase                                                | 47 | 9 | 1.05 | 1.16 | 32 | 7  | 1.03 | 1.01  |
| <i>Prkacb</i>  | cAMP-dependent protein kinase catalytic subunit beta isoform        | 1  | 1 | 0.89 | 0.88 | ND | ND | ND   | ND    |
| <i>Prkar1a</i> | cAMP-dependent protein kinase type I-alpha regulatory subunit       | 4  | 1 | 1.18 | 1.01 | 10 | 2  | 0.99 | 1.02  |
| <i>Prkar2a</i> | cAMP-dependent protein kinase type II-alpha regulatory subunit      | 1  | 1 | 0.87 | 1.00 | ND | ND | ND   | ND    |
| <i>Prkcsh</i>  | glucosidase 2 subunit beta                                          | 39 | 5 | 1.10 | 1.04 | 20 | 4  | 1.19 | 1.20  |
| <i>Prmt1</i>   | protein arginine N-methyltransferase 1                              | 8  | 2 | 1.03 | 0.89 | 7  | 2  | 1.07 | 0.97  |
| <i>Prmt5</i>   | protein arginine N-methyltransferase 5                              | 2  | 1 | 1.16 | 1.05 | 3  | 1  | 1.32 | 1.21  |
| <i>Prosc</i>   | proline synthetase co-transcribed bacterial homolog protein isoform | 2  | 1 | 0.77 | 0.78 | ND | ND | ND   | ND    |
| <i>Prpf19</i>  | pre-mRNA-processing factor 19                                       | 3  | 2 | 0.64 | 0.85 | 2  | 1  | 1.25 | 0.02  |
| <i>Prpf38a</i> | pre-mRNA-splicing factor 38A                                        | 1  | 1 | 1.34 | 1.17 | ND | ND | ND   | ND    |
| <i>Prpf40a</i> | pre-mRNA-processing factor 40 homolog A                             | 1  | 1 | 0.68 | 0.72 | ND | ND | ND   | ND    |
| <i>Prpf6</i>   | pre-mRNA-processing factor 6                                        | 1  | 1 | 1.24 | 1.37 | ND | ND | ND   | ND    |
| <i>Prpf8</i>   | Pre-mRNA-processing-splicing factor 8                               | 4  | 2 | 5.95 | 5.82 | 2  | 1  | 1.30 | 1.35  |
| <i>Prps1</i>   | Ribose-phosphate pyrophosphokinase 1                                | 7  | 1 | 1.26 | 1.40 | ND | ND | ND   | ND    |
| <i>Prps2</i>   | Ribose-phosphate pyrophosphokinase 2                                | 10 | 2 | 1.08 | 1.25 | ND | ND | ND   | ND    |
| <i>Prrc1</i>   | Protein PRRC1                                                       | 1  | 1 | 0.93 | 1.14 | ND | ND | ND   | ND    |
| <i>Prrc2a</i>  | large proline-rich protein BAT2                                     | 1  | 1 | ND   | ND   | 1  | 1  | 1.01 | 16.74 |
| <i>Prss1</i>   | Protease, serine, 1                                                 | 4  | 2 | 0.73 | 1.00 | ND | ND | ND   | ND    |
| <i>Prune</i>   | protein prune homolog                                               | 2  | 1 | 0.89 | 0.86 | 4  | 2  | 1.00 | 0.80  |
| <i>Pzca</i>    | prostate stem cell antigen                                          | 9  | 2 | 0.87 | 1.42 | ND | ND | ND   | ND    |
| <i>Psg16</i>   | Pregnancy specific glycoprotein 16                                  | 1  | 1 | ND   | ND   | ND | ND | ND   | ND    |
| <i>Psm1</i>    | proteasome subunit alpha type-1                                     | 3  | 1 | 1.22 | 1.66 | ND | ND | ND   | ND    |
| <i>Psm2</i>    | Proteasome subunit alpha type-2                                     | 10 | 3 | 0.95 | 0.90 | 8  | 2  | 1.20 | 0.94  |
| <i>Psm3</i>    | proteasome subunit alpha type-3                                     | 5  | 2 | 0.94 | 0.98 | 3  | 1  | 0.95 | 1.11  |
| <i>Psm4</i>    | proteasome subunit alpha type-4                                     | 9  | 4 | 1.27 | 1.10 | 11 | 3  | 0.89 | 0.99  |
| <i>Psm5</i>    | proteasome subunit alpha type-5                                     | 21 | 4 | 0.81 | 0.87 | 19 | 4  | 0.77 | 0.86  |
| <i>Psm6</i>    | proteasome subunit alpha type-6                                     | 25 | 3 | 0.92 | 0.97 | 18 | 3  | 1.05 | 0.99  |
| <i>Psm7</i>    | proteasome subunit alpha type-7                                     | 50 | 3 | 0.92 | 0.96 | 45 | 2  | 0.90 | 0.99  |
| <i>Psm1</i>    | proteasome subunit beta type-1                                      | 31 | 5 | 1.13 | 1.08 | 36 | 4  | 1.09 | 1.06  |
| <i>Psm2</i>    | proteasome subunit beta type-2                                      | 46 | 2 | 1.04 | 1.02 | 31 | 2  | 1.03 | 1.09  |
| <i>Psm3</i>    | proteasome subunit beta type-3                                      | 13 | 3 | 0.97 | 0.91 | 25 | 3  | 0.92 | 0.91  |
| <i>Psm4</i>    | proteasome subunit beta type-4                                      | 8  | 2 | 0.99 | 1.08 | 5  | 2  | 0.82 | 0.92  |
| <i>Psm5</i>    | proteasome beta 5 subunit                                           | 21 | 3 | 1.17 | 1.32 | 11 | 2  | 1.38 | 1.35  |
| <i>Psm6</i>    | proteasome subunit beta type-6                                      | 6  | 2 | 0.12 | 0.31 | 3  | 1  | 0.87 | 1.06  |



|               |                                                            |     |   |      |      |     |    |      |      |
|---------------|------------------------------------------------------------|-----|---|------|------|-----|----|------|------|
| <i>Psmb8</i>  | Proteasome subunit beta type-8                             | 4   | 2 | 1.26 | 1.16 | 5   | 2  | 1.10 | 1.16 |
| <i>Psmc1</i>  | 26S protease regulatory subunit 4                          | 17  | 4 | 0.95 | 0.84 | 12  | 3  | 0.93 | 0.91 |
| <i>Psmc2</i>  | 26S protease regulatory subunit 7                          | 21  | 6 | 1.09 | 0.94 | 21  | 4  | 1.01 | 1.20 |
| <i>Psmc3</i>  | 26S protease regulatory subunit 6A                         | 32  | 6 | 1.02 | 0.84 | 28  | 5  | 0.98 | 0.97 |
| <i>Psmc4</i>  | 26S Protease regulatory subunit 6B                         | 3   | 1 | 0.95 | 0.63 | ND  | ND | ND   | ND   |
| <i>Psmc5</i>  | 26S protease regulatory subunit 8                          | 9   | 5 | 0.83 | 1.29 | 6   | 2  | 1.26 | 1.14 |
| <i>Psmc6</i>  | 26S protease regulatory subunit S10B                       | 28  | 4 | 1.16 | 1.11 | 33  | 3  | 1.11 | 1.06 |
| <i>Psmd1</i>  | 26S proteasome non-ATPase regulatory subunit 1             | 42  | 6 | 1.09 | 1.12 | 20  | 5  | 1.15 | 1.02 |
| <i>Psmd11</i> | 26S proteasome non-ATPase regulatory subunit 11            | 26  | 5 | 0.95 | 1.11 | 26  | 4  | 0.88 | 0.96 |
| <i>Psmd12</i> | 26S proteasome non-ATPase regulatory subunit 12            | 11  | 3 | 0.89 | 0.94 | 9   | 2  | 0.92 | 1.01 |
| <i>Psmd13</i> | 26S proteasome non-ATPase regulatory subunit 13            | 3   | 2 | 2.23 | 1.93 | 6   | 2  | 1.44 | 0.80 |
| <i>Psmd14</i> | 26S proteasome non-ATPase regulatory subunit 14            | 5   | 2 | 0.90 | 0.92 | 5   | 3  | 1.29 | 1.23 |
| <i>Psmd2</i>  | 26S proteasome non-ATPase regulatory subunit 2             | 23  | 5 | 0.86 | 1.06 | 4   | 1  | 0.73 | 0.88 |
| <i>Psmd3</i>  | 26S proteasome non-ATPase regulatory subunit 3             | 15  | 6 | 1.07 | 1.11 | 7   | 3  | 1.08 | 1.15 |
| <i>Psmd4</i>  | 26S proteasome non-ATPase regulatory subunit 4             | 5   | 1 | 0.13 | 0.92 | 2   | 1  | 1.02 | 1.01 |
| <i>Psmd5</i>  | 26S proteasome non-ATPase regulatory subunit 5             | 5   | 4 | 0.90 | 1.24 | 1   | 1  | 1.19 | 1.27 |
| <i>Psmd6</i>  | 26S proteasome non-ATPase regulatory subunit 6             | 2   | 1 | 1.25 | 1.23 | ND  | ND | ND   | ND   |
| <i>Psmd8</i>  | 26S proteasome non-ATPase regulatory subunit 8             | 1   | 1 | 0.82 | 0.98 | ND  | ND | ND   | ND   |
| <i>Psmd9</i>  | 26S proteasome non-ATPase regulatory subunit 9             | 4   | 2 | 1.17 | 1.17 | 3   | 1  | 1.30 | 1.17 |
| <i>Psmc1</i>  | proteasome activator complex subunit 1                     | 33  | 2 | 0.87 | 0.88 | 19  | 2  | 0.79 | 0.85 |
| <i>Psmc2</i>  | proteasome activator complex subunit 2 isoform 2           | 16  | 2 | 0.89 | 1.02 | 10  | 2  | 0.97 | 1.00 |
| <i>Psmc3</i>  | proteasome activator complex subunit 3                     | 2   | 1 | ND   | ND   | 5   | 2  | 1.00 | 2.29 |
| <i>Psmg2</i>  | proteasome assembly chaperone 2                            | 6   | 1 | ND   | ND   | 7   | 1  | 0.00 | 0.00 |
| <i>Pspc1</i>  | paraspeckle component 1                                    | 1   | 1 | 0.92 | 0.97 | ND  | ND | ND   | ND   |
| <i>Ptbp1</i>  | Polypyrimidine tract-binding protein 1 isoform 2           | 22  | 2 | 1.36 | 1.17 | 16  | 1  | 0.93 | 0.83 |
| <i>Ptgrn</i>  | prostaglandin F2 receptor negative regulator               | 1   | 1 | 1.12 | 1.09 | 1   | 1  | 1.24 | 1.27 |
| <i>Ptgis</i>  | prostaglandin I2 synthase                                  | 3   | 1 | 1.55 | 0.09 | 2   | 1  | 1.04 | 1.14 |
| <i>Ptgr1</i>  | Prostaglandin reductase 1                                  | 138 | 7 | 1.19 | 1.20 | 124 | 7  | 1.18 | 1.16 |
| <i>Ptk2</i>   | focal adhesion kinase 1 isoform 1                          | 1   | 1 | ND   | ND   | ND  | ND | ND   | ND   |
| <i>Ptk7</i>   | tyrosine-protein kinase-like 7                             | 3   | 1 | 0.90 | 1.42 | 1   | 1  | 0.99 | 3.12 |
| <i>Ptms</i>   | parathymosin                                               | 2   | 1 | 0.94 | 1.94 | ND  | ND | ND   | ND   |
| <i>Ptpn1</i>  | Tyrosine-protein phosphatase non-receptor type 1           | 5   | 2 | 0.86 | 0.75 | 2   | 1  | 1.33 | 1.03 |
| <i>Ptpn6</i>  | Tyrosine-protein phosphatase non-receptor type 6 isoform a | 2   | 1 | 0.89 | 1.09 | ND  | ND | ND   | ND   |
| <i>Ptrf</i>   | polymerase I and transcript release factor                 | 34  | 3 | 0.78 | 0.85 | 24  | 3  | 1.09 | 0.91 |

|                |                                                           |    |    |      |      |    |    |      |      |
|----------------|-----------------------------------------------------------|----|----|------|------|----|----|------|------|
| <i>Puf60</i>   | poly(U)-binding-splicing factor PUF60 isoform c           | 4  | 3  | 1.02 | 0.94 | 2  | 2  | 0.77 | 0.71 |
| <i>Purb</i>    | transcriptional activator protein Pur-beta                | 17 | 5  | 1.12 | 1.24 | 13 | 3  | 0.89 | 1.01 |
| <i>Pvr14</i>   | poliovirus receptor-related protein 4 isoform b           | 8  | 4  | 0.91 | 0.93 | 8  | 3  | 1.08 | 0.88 |
| <i>Pycard</i>  | Apoptosis-associated speck-like protein containing a CARD | 32 | 4  | 1.05 | 1.07 | 13 | 3  | 1.05 | 1.25 |
| <i>Pycrl</i>   | Pyrroline-5-carboxylate reductase 3                       | 2  | 1  | 1.07 | 1.11 | ND | ND | ND   | ND   |
| <i>Pygb</i>    | glycogen phosphorylase, brain form                        | 38 | 7  | 1.14 | 1.37 | 27 | 3  | 1.11 | 1.36 |
| <i>Pygl</i>    | glycogen phosphorylase, liver form                        | 16 | 10 | 1.01 | 1.19 | 7  | 5  | 1.07 | 1.28 |
| <i>Qars</i>    | glutamyl-tRNA synthetase isoform 1                        | 7  | 3  | 0.85 | 1.03 | ND | ND | ND   | ND   |
| <i>Qars</i>    | glutamyl-tRNA synthetase isoform 2                        | 2  | 1  | 0.99 | 1.10 | ND | ND | ND   | ND   |
| <i>Qdpr</i>    | dihydropteridine reductase                                | 7  | 3  | 0.96 | 1.13 | 1  | 1  | 0.66 | 0.91 |
| <i>Qk</i>      | protein quaking isoform 2                                 | 1  | 1  | 1.06 | 1.26 | ND | ND | ND   | ND   |
| <i>Qrich1</i>  | Glutamine-rich protein 1                                  | 1  | 1  | 1.24 | 0.81 | ND | ND | ND   | ND   |
| <i>Qsox1</i>   | Sulfhydryl oxidase 1 isoform b                            | 1  | 1  | 0.95 | 0.73 | ND | ND | ND   | ND   |
| <i>Rab1</i>    | ras-related protein Rab-1A                                | 83 | 6  | 0.87 | 0.75 | 68 | 6  | 0.86 | 0.79 |
| <i>Rab10</i>   | ras-related protein Rab-10                                | 37 | 3  | 0.99 | 0.75 | 40 | 3  | 0.95 | 0.76 |
| <i>Rab11b</i>  | ras-related protein Rab-11B                               | 51 | 8  | 0.95 | 0.93 | 25 | 5  | 0.98 | 0.91 |
| <i>Rab14</i>   | ras-related protein Rab-14                                | 46 | 6  | 0.92 | 1.13 | 31 | 4  | 0.99 | 1.34 |
| <i>Rab18</i>   | ras-related protein Rab-18                                | 15 | 3  | 1.15 | 1.06 | 12 | 2  | 0.99 | 0.97 |
| <i>Rab1b</i>   | ras-related protein Rab-1B                                | 58 | 6  | 1.18 | 0.98 | 50 | 6  | 1.04 | 0.84 |
| <i>Rab25</i>   | ras-related protein Rab-25                                | 19 | 4  | 1.14 | 1.08 | 3  | 2  | 0.98 | 0.97 |
| <i>Rab2a</i>   | Ras-related protein Rab-2A                                | 39 | 4  | 1.09 | 1.07 | 26 | 3  | 0.99 | 1.01 |
| <i>Rab3d</i>   | Ras-related protein Rab-3D                                | 19 | 5  | 1.16 | 1.07 | 20 | 3  | 1.18 | 1.04 |
| <i>Rab5a</i>   | Ras-related protein Rab-5A                                | 26 | 3  | 1.44 | 2.41 | 19 | 4  | 1.17 | 1.09 |
| <i>Rab5c</i>   | Ras-related protein Rab-5C                                | 77 | 7  | 1.06 | 1.02 | 46 | 6  | 1.17 | 1.06 |
| <i>Rab6</i>    | Ras-related protein Rab-6A isoform 2                      | 15 | 3  | 1.17 | 2.61 | 16 | 2  | 0.97 | 1.05 |
| <i>Rab7</i>    | Ras-related protein Rab-7a                                | 65 | 5  | 0.93 | 0.87 | 57 | 5  | 0.93 | 0.87 |
| <i>Rab8a</i>   | ras-related protein Rab-8A                                | 25 | 3  | 1.09 | 0.63 | 30 | 3  | 1.04 | 0.72 |
| <i>Rabggta</i> | geranylgeranyl transferase type-2 subunit alpha           | 3  | 1  | 0.78 | 0.80 |    |    | ND   | ND   |
| <i>Rac1</i>    | ras-related C3 botulinum toxin substrate 1                | 34 | 5  | 1.24 | 1.04 | 21 | 4  | 1.29 | 1.11 |
| <i>Rad21</i>   | double-strand-break repair protein rad21 homolog          | 2  | 1  | 0.96 | 0.98 | ND | ND | ND   | ND   |
| <i>Rad23b</i>  | UV excision repair protein RAD23 homolog B                | 16 | 2  | 1.02 | 0.69 | 11 | 3  | 0.96 | 0.71 |
| <i>Rae1</i>    | mRNA export factor                                        | 2  | 1  | 0.91 | 1.10 | ND | ND | ND   | ND   |
| <i>Ralb</i>    | Ras-related protein Ral-B                                 | 2  | 2  | 0.75 | 0.73 | ND | ND | ND   | ND   |
| <i>Raly</i>    | RNA-binding protein Raly short isoform                    | 10 | 2  | 1.42 | 1.30 | 1  | 1  | 0.00 | 0.00 |

|                |                                                              |    |   |      |      |    |    |      |      |
|----------------|--------------------------------------------------------------|----|---|------|------|----|----|------|------|
| <i>Ranbp1</i>  | Ran-specific GTPase-activating protein                       | 10 | 2 | 0.87 | 0.88 | 3  | 1  | 0.88 | 0.81 |
| <i>Ranbp3</i>  | ran-binding protein 3                                        | 1  | 1 | 0.94 | 0.84 | ND | ND | ND   | ND   |
| <i>Ranbp6</i>  | ran-binding protein 6                                        | 2  | 1 | 0.98 | 0.59 | ND | ND | ND   | ND   |
| <i>Rangap1</i> | ran GTPase-activating protein 1                              | 3  | 1 | 0.83 | 0.83 | 6  | 1  | 0.89 | 0.90 |
| <i>Rap2b</i>   | Ras-related protein Rap-2b                                   | 1  | 1 | 0.97 | 1.05 | ND | ND | ND   | ND   |
| <i>Raph1</i>   | Ras association (RalGDS/AF-6) and pleckstrin homology domain | 1  | 1 | ND   | ND   | ND | ND | ND   | ND   |
| <i>Rars</i>    | arginyl-tRNA synthetase, cytoplasmic                         | 4  | 4 | 0.95 | 1.35 | 2  | 2  | 0.99 | 1.16 |
| <i>Rasa1</i>   | RAS p21 protein activator 1                                  | 3  | 1 | 1.07 | 1.15 | 2  | 1  | 1.01 | 0.92 |
| <i>Rbbp7</i>   | Histone-binding protein RBBP7                                | 23 | 3 | 0.81 | 0.85 | 11 | 3  | 0.79 | 0.86 |
| <i>Rbm12</i>   | RNA-binding protein 12                                       | 1  | 1 | 1.01 | 1.07 | ND | ND | ND   | ND   |
| <i>Rbm14</i>   | RNA-binding protein 14                                       | 7  | 4 | 1.18 | 1.06 | 4  | 2  | 1.17 | 1.22 |
| <i>Rbm25</i>   | RNA-binding protein 25                                       | 1  | 1 | 0.96 | 0.96 | ND | ND | ND   | ND   |
| <i>Rbm3</i>    | putative RNA-binding protein 3 isoform 2                     | 2  | 1 | 1.05 | 0.95 | ND | ND | ND   | ND   |
| <i>Rbm39</i>   | RNA-binding protein 39                                       | 3  | 2 | 1.02 | 0.91 | ND | ND | ND   | ND   |
| <i>Rbm47</i>   | RNA-binding protein 47                                       | 3  | 1 | 2.57 | 0.41 | 4  | 2  | 0.37 | 0.85 |
| <i>Rbm8a</i>   | RNA-binding protein 8A isoform b                             | 3  | 1 | 0.96 | 0.95 | 2  | 1  | 1.88 | 1.84 |
| <i>Rbmxrt</i>  | heterogeneous nuclear ribonucleoprotein G                    | 9  | 2 | 0.92 | 0.67 | 5  | 1  | 0.92 | 0.76 |
| <i>Rbp2</i>    | retinol-binding protein 2                                    | 10 | 2 | 1.06 | 1.14 | 2  | 1  | 1.09 | 1.20 |
| <i>Rcn1</i>    | reticulocalbin-1                                             | 12 | 3 | 0.93 | 1.03 | 12 | 3  | 1.05 | 1.07 |
| <i>Rcn2</i>    | Reticulocalbin-2                                             | 11 | 3 | 0.99 | 0.82 | 10 | 3  | 0.83 | 1.03 |
| <i>Rcn3</i>    | reticulocalbin-3                                             | 20 | 4 | 1.27 | 1.83 | 11 | 3  | 1.25 | 1.51 |
| <i>Rdbp</i>    | Negative elongation factor E                                 | 3  | 1 | 1.55 | 1.91 | ND | ND | ND   | ND   |
| <i>Rdx</i>     | Radixin isoform a                                            | 54 | 8 | 0.71 | 0.86 | 50 | 8  | 0.72 | 0.95 |
| <i>Reck</i>    | reversion-inducing cysteine-rich protein with Kazal motifs   | 2  | 1 | ND   | ND   | ND | ND | ND   | ND   |
| <i>Reep4</i>   | receptor expression-enhancing protein 4                      | 5  | 1 | 0.13 | 0.19 | 3  | 1  | 2.46 | 0.54 |
| <i>Reep5</i>   | Receptor expression-enhancing protein 5                      | 2  | 1 | 1.37 | 1.38 | ND | ND | ND   | ND   |
| <i>Rer1</i>    | Protein RER1                                                 | 4  | 1 | 1.00 | 1.25 | 3  | 1  | 1.18 | 1.07 |
| <i>Rfc4</i>    | replication factor C subunit 4                               | 2  | 1 | 1.18 | 0.99 | ND | ND | ND   | ND   |
| <i>Rheb</i>    | GTP-binding protein Rheb                                     | 4  | 1 | 1.17 | 1.02 | ND | ND | ND   | ND   |
| <i>Rhobtb2</i> | rho-related BTB domain-containing protein 2                  | 7  | 1 | 2.21 | 1.97 | 6  | 1  | 2.39 | 2.14 |
| <i>Rhoc</i>    | Rho-related GTP-binding protein RhoC                         | 7  | 1 | 1.19 | 1.22 | 4  | 1  | 1.03 | 1.22 |
| <i>Rhog</i>    | rho-related GTP-binding protein RhoG                         | 14 | 3 | 1.02 | 1.06 | 8  | 3  | 1.39 | 0.98 |
| <i>Ribc1</i>   | RIB43A-like with coiled-coils protein 1                      | 1  | 1 | ND   | ND   | ND | ND | ND   | ND   |
| <i>Rnf126</i>  | ring finger protein 126                                      | 1  | 1 | 1.66 | 1.61 | ND | ND | ND   | ND   |

|               |                                                                |     |   |      |      |    |    |      |      |
|---------------|----------------------------------------------------------------|-----|---|------|------|----|----|------|------|
| <i>Rnf39</i>  | Ring finger protein 39                                         | 7   | 1 | 0.92 | 1.16 | 6  | 1  | 0.88 | 1.44 |
| <i>Rnh1</i>   | ribonuclease inhibitor isoform a                               | 74  | 8 | 1.02 | 1.08 | 71 | 8  | 1.16 | 1.13 |
| <i>Rnpep</i>  | aminopeptidase B isoform 1                                     | 45  | 7 | 1.22 | 1.25 | 43 | 7  | 1.18 | 1.32 |
| <i>Rnps1</i>  | RNA-binding protein with serine-rich domain 1 isoform 2        | 5   | 2 | 1.03 | 0.91 | ND | ND | ND   | ND   |
| <i>Rock2</i>  | Rho-associated protein kinase 2                                | 7   | 2 | 1.10 | 0.87 | 2  | 2  | 1.09 | 0.99 |
| <i>Rod1</i>   | regulator of differentiation 1 isoform 2                       | 3   | 1 | ND   | ND   | 3  | 1  | 0.46 | 0.42 |
| <i>Rpa1</i>   | replication protein A 70 kDa DNA-binding subunit isoform 2     | 4   | 2 | 1.01 | 1.75 | ND | ND | ND   | ND   |
| <i>Rpe</i>    | ribulose-phosphate 3-epimerase                                 | 2   | 1 | 2.35 | 4.50 | 1  | 1  | 1.63 | 2.17 |
| <i>Rpia</i>   | ribose-5-phosphate isomerase                                   | 5   | 1 | 0.78 | 0.80 | ND | ND | ND   | ND   |
| <i>Rpl11</i>  | 60S Ribosomal protein L11                                      | 25  | 2 | 0.83 | 0.89 | 24 | 2  | 0.84 | 0.94 |
| <i>Rpl12</i>  | 60S ribosomal protein L12                                      | 66  | 4 | 1.36 | 1.09 | 52 | 3  | 1.36 | 1.09 |
| <i>Rpl13a</i> | 60S ribosomal protein L13a                                     | 21  | 3 | 1.09 | 1.09 | 16 | 4  | 1.60 | 1.69 |
| <i>Rpl14</i>  | 60S Ribosomal protein L14                                      | 48  | 5 | 0.89 | 0.99 | ND | ND | ND   | ND   |
| <i>Rpl18</i>  | 60S ribosomal protein L18                                      | 106 | 3 | 1.04 | 1.02 | 84 | 3  | 1.04 | 1.00 |
| <i>Rpl18a</i> | 60S ribosomal protein L18a                                     | 56  | 2 | 1.98 | 1.61 | 29 | 2  | 1.94 | 1.57 |
| <i>Rpl19</i>  | 60S ribosomal protein L19 isoform 2                            | 39  | 2 | 1.02 | 0.87 | 30 | 2  | 1.06 | 0.91 |
| <i>Rpl23</i>  | 60S ribosomal protein L23                                      | 60  | 5 | 1.19 | 1.20 | 52 | 4  | 1.15 | 1.16 |
| <i>Rpl26</i>  | 60S ribosomal protein L26                                      | 7   | 1 | 0.99 | 0.93 | 6  | 1  | 0.98 | 1.02 |
| <i>Rpl4</i>   | 60S ribosomal protein L4                                       | 64  | 6 | 0.95 | 0.94 | 64 | 4  | 0.90 | 0.91 |
| <i>Rpl7</i>   | 60S ribosomal protein L7                                       | 11  | 4 | 0.92 | 0.88 | 17 | 4  | 0.95 | 1.03 |
| <i>Rpl8</i>   | 60S ribosomal protein L8                                       | 12  | 1 | 1.10 | 0.91 | 14 | 3  | 1.02 | 0.96 |
| <i>Rplp0</i>  | 60S acidic ribosomal protein P0                                | 85  | 8 | 0.87 | 0.86 | 75 | 7  | 0.87 | 0.91 |
| <i>Rplp1</i>  | 60S acidic ribosomal protein P1                                | 35  | 2 | 1.08 | 0.92 | 48 | 2  | 0.93 | 0.98 |
| <i>Rplp2</i>  | 60S acidic ribosomal protein P2                                | 71  | 4 | 0.91 | 0.90 | 57 | 4  | 0.95 | 0.93 |
| <i>Rpn1</i>   | dolichyl-diphosphooligosaccharide--protein glycosyltransferase | 19  | 7 | 0.97 | 0.94 | 14 | 5  | 0.97 | 0.96 |
| <i>Rpn2</i>   | dolichyl-diphosphooligosaccharide--protein glycosyltransferase | 23  | 5 | 0.91 | 0.88 | 20 | 3  | 1.06 | 0.98 |
| <i>Rprd1b</i> | regulation of nuclear pre-mRNA domain-containing protein 1B    | 2   | 1 | 0.77 | 0.89 | 3  | 1  | 0.96 | 1.12 |
| <i>Rps10</i>  | 40S Ribosomal protein S10                                      | 26  | 2 | 1.03 | 0.99 | 22 | 2  | 1.07 | 0.94 |
| <i>Rps14</i>  | 40S ribosomal protein S14                                      | 64  | 3 | 1.07 | 1.01 | 43 | 3  | 1.06 | 1.00 |
| <i>Rps15</i>  | 40S ribosomal protein S15                                      | 13  | 1 | 1.03 | 0.84 | 12 | 1  | 1.35 | 0.97 |
| <i>Rps17</i>  | 40S ribosomal protein S17                                      | 31  | 3 | 1.24 | 1.12 | 29 | 3  | 1.17 | 1.09 |
| <i>Rps19</i>  | 40S ribosomal protein S19                                      | 39  | 3 | 1.12 | 1.11 | 28 | 3  | 1.14 | 1.20 |
| <i>Rps20</i>  | 40S Ribosomal protein S20                                      | 1   | 1 | 1.37 | 1.49 | 1  | 1  | 1.49 | 1.51 |
| <i>Rps21</i>  | 40S ribosomal protein S21                                      | 11  | 2 | 1.17 | 1.03 | ND | ND | ND   | ND   |

|                |                                                         |     |    |      |      |     |    |      |      |
|----------------|---------------------------------------------------------|-----|----|------|------|-----|----|------|------|
| <i>Rps24</i>   | 40S ribosomal protein S24 isoform 1                     | 33  | 2  | 0.85 | 0.64 | 11  | 2  | 0.87 | 0.81 |
| <i>Rps27l</i>  | 40S Ribosomal protein S27-like protein                  | 16  | 2  | 0.94 | 1.01 | 10  | 2  | 1.11 | 1.06 |
| <i>Rps3</i>    | 40S ribosomal protein S3                                | 155 | 11 | 1.02 | 0.87 | 161 | 9  | 1.03 | 0.92 |
| <i>Rps4x</i>   | 40S ribosomal protein S4, X isoform                     | 60  | 9  | 0.99 | 0.89 | 30  | 5  | 1.27 | 0.91 |
| <i>Rps5</i>    | 40S ribosomal protein S5                                | 21  | 4  | 1.37 | 1.30 | 16  | 3  | 1.31 | 1.33 |
| <i>Rps6ka1</i> | Ribosomal protein S6 kinase alpha-1                     | 2   | 1  | 0.76 | 1.22 | ND  | ND | ND   | ND   |
| <i>Rps6ka3</i> | ribosomal protein S6 kinase alpha-3                     | 11  | 3  | 0.85 | 0.95 | 6   | 2  | 0.96 | 0.90 |
| <i>Rps6ka4</i> | ribosomal protein S6 kinase alpha-4                     | 1   | 1  | 0.99 | 1.08 | ND  | ND | ND   | ND   |
| <i>Rps9</i>    | 40S ribosomal protein S9                                | 28  | 4  | 1.16 | 1.13 | 20  | 3  | 1.18 | 1.12 |
| <i>Rras2</i>   | Ras-related protein R-Ras2                              | 3   | 1  | 1.16 | 0.85 | 3   | 1  | 0.69 | 1.08 |
| <i>Rrbp1</i>   | Ribosome-binding protein 1 isoform a                    | 27  | 9  | 1.16 | 1.23 | 8   | 4  | 1.14 | 1.13 |
| <i>Rtcd1</i>   | RNA 3'-terminal phosphate cyclase                       | 1   | 1  | 1.36 | 1.15 | ND  | ND | ND   | ND   |
| <i>Rtkn</i>    | rhotekin isoform b                                      | 1   | 1  | 1.03 | 1.06 | ND  | ND | ND   | ND   |
| <i>Rtn4</i>    | reticulon-4 isoform B1                                  | 15  | 3  | 1.23 | 1.13 | 21  | 4  | 1.02 | 0.93 |
| <i>Rttn</i>    | rotatin                                                 | 5   | 1  | 0.81 | 0.91 | 6   | 1  | 0.83 | 0.97 |
| <i>Rufy4</i>   | RUN and FYVE domain-containing protein 4 isoform 2      | 1   | 1  | ND   | ND   | ND  | ND | ND   | ND   |
| <i>Ruvbl1</i>  | ruvB-like 1                                             | 21  | 4  | 1.07 | 1.03 | 11  | 2  | 1.34 | 0.98 |
| <i>Ruvbl2</i>  | ruvB-like 2                                             | 13  | 5  | 0.90 | 0.94 | 13  | 4  | 0.94 | 0.85 |
| <i>S100a10</i> | protein S100-A10                                        | 3   | 2  | 1.16 | 1.11 | 1   | 1  | 1.21 | 1.01 |
| <i>S100a11</i> | protein S100-A11                                        | 52  | 3  | 0.84 | 0.78 | 84  | 3  | 0.92 | 0.72 |
| <i>S100a13</i> | protein S100-A13                                        | 7   | 1  | 1.10 | 1.18 | 4   | 1  | 1.04 | 1.10 |
| <i>S100a14</i> | protein S100-A14 isoform a                              | 10  | 3  | 1.00 | 0.93 | 9   | 2  | 0.96 | 0.95 |
| <i>S100a16</i> | S100 calcium binding protein A16                        | 19  | 1  | 1.04 | 0.78 | 10  | 1  | 1.00 | 0.91 |
| <i>S100a6</i>  | protein S100-A6                                         | 82  | 2  | 1.13 | 1.10 | 57  | 2  | 0.99 | 1.02 |
| <i>Sacm1l</i>  | Phosphatidylinositide phosphatase SAC1                  | 2   | 1  | 1.03 | 0.89 | 2   | 1  | 0.91 | 0.90 |
| <i>Sae1</i>    | SUMO-activating enzyme subunit 1                        | 3   | 1  | 1.57 | 1.37 | 2   | 1  | 0.09 | 0.16 |
| <i>Safb</i>    | scaffold attachment factor B                            | 1   | 1  | 0.97 | 1.04 | ND  | ND | ND   | ND   |
| <i>Samhd1</i>  | SAM domain and HD domain-containing protein 1 isoform 2 | 1   | 1  | 0.92 | 1.00 | ND  | ND | ND   | ND   |
| <i>Samm50</i>  | sorting and assembly machinery component 50 homolog     | 1   | 1  | 1.09 | 1.18 | ND  | ND | ND   | ND   |
| <i>Sar1b</i>   | GTP-binding protein SAR1b                               | 2   | 1  | 0.84 | 0.83 | ND  | ND | ND   | ND   |
| <i>Sars</i>    | seryl-tRNA synthetase, cytoplasmic                      | 6   | 2  | 1.07 | 1.15 | 12  | 3  | 1.03 | 1.01 |
| <i>Sart3</i>   | squamous cell carcinoma antigen recognized by T-cells 3 | 2   | 1  | 1.05 | 1.02 | 3   | 1  | 1.01 | 1.04 |
| <i>Sbds</i>    | ribosome maturation protein SBDS                        | 2   | 1  | 0.87 | 0.85 | ND  | ND | ND   | ND   |
| <i>Scaf4</i>   | Splicing factor, arginine/serine-rich 15                | 5   | 1  | 0.99 | 1.11 | ND  | ND | ND   | ND   |

|                  |                                                               |     |    |      |      |     |    |      |      |
|------------------|---------------------------------------------------------------|-----|----|------|------|-----|----|------|------|
| <i>Scamp1</i>    | secretory carrier-associated membrane protein 1               | 6   | 1  | 1.05 | 0.98 | 7   | 1  | 1.06 | 0.98 |
| <i>Scamp2</i>    | Secretory carrier-associated membrane protein 2               | 2   | 1  | 1.13 | 0.80 | ND  | ND | ND   | ND   |
| <i>Scel</i>      | sciellin                                                      | 15  | 6  | 0.92 | 0.97 | 11  | 6  | 0.93 | 0.87 |
| <i>Scfd1</i>     | sec1 family domain-containing protein 1                       | 10  | 2  | 1.06 | 2.50 | ND  | ND | ND   | ND   |
| <i>Scin</i>      | adseverin isoform 1                                           | 114 | 13 | 0.94 | 0.95 | 74  | 10 | 0.98 | 1.02 |
| <i>Sdc1</i>      | syndecan-1                                                    | 6   | 1  | 0.86 | 0.90 | 6   | 2  | 0.88 | 0.87 |
| <i>Sdha</i>      | succinate dehydrogenase [ubiquinone] flavoprotein subunit, m  | 5   | 1  | 0.95 | 1.03 | 3   | 1  | 0.93 | 1.12 |
| <i>Sdhb</i>      | succinate dehydrogenase [ubiquinone] iron-sulfur subunit, mit | 1   | 1  | 0.98 | 0.62 | ND  | ND | ND   | ND   |
| <i>Sec11a</i>    | signal peptidase complex catalytic subunit SEC11A             | 1   | 1  | 1.16 | 1.13 | 3   | 2  | 1.18 | 1.16 |
| <i>Sec13</i>     | protein SEC13 homolog                                         | 6   | 2  | 1.00 | 0.97 | 5   | 2  | 1.10 | 6.88 |
| <i>Sec16a</i>    | SEC16 homolog A                                               | 2   | 2  | 0.89 | 1.16 | 1   | 1  | 1.47 | 0.94 |
| <i>Sec22b</i>    | vesicle-trafficking protein SEC22b                            | 14  | 2  | 1.06 | 0.90 | 8   | 3  | 1.02 | 1.21 |
| <i>Sec23a</i>    | protein transport protein Sec23A                              | 6   | 4  | 1.30 | 1.25 | 3   | 2  | 1.35 | 1.39 |
| <i>Sec24b</i>    | Sec24 related gene family, member B                           | 2   | 1  | ND   | ND   | ND  | ND | ND   | ND   |
| <i>Sec24c</i>    | Sec24 related gene family, member C isoform 2                 | 3   | 2  | 1.13 | 1.15 | 1   | 1  | ND   | ND   |
| <i>Sec31a</i>    | protein transport protein Sec31A                              | 3   | 3  | 0.95 | 1.03 | ND  | ND | ND   | ND   |
| <i>Sema4d</i>    | semaphorin-4D                                                 | 1   | 1  | 1.93 | 1.69 | ND  | ND | ND   | ND   |
| <i>Serbp1</i>    | Plasminogen activator inhibitor 1 RNA-binding protein isoform | 20  | 1  | 0.80 | 0.98 | 12  | 1  | 0.80 | 0.93 |
| <i>Serpina1d</i> | alpha-1-antitrypsin 1-4                                       | 55  | 4  | 1.02 | 0.61 | 52  | 3  | 1.02 | 0.64 |
| <i>Serpina1e</i> | alpha-1-antitrypsin 1-5                                       | 14  | 3  | 1.31 | 0.92 | 13  | 2  | 1.41 | 1.11 |
| <i>Serpina3k</i> | Serine protease inhibitor A3K                                 | 220 | 9  | 1.13 | 0.71 | 229 | 10 | 1.15 | 0.67 |
| <i>Serpina3n</i> | Serine protease inhibitor A3N                                 | 55  | 4  | 1.17 | 0.91 | 41  | 3  | 1.02 | 0.83 |
| <i>Serpinb11</i> | Serpin B11                                                    | 1   | 1  | 1.30 | 1.19 | ND  | ND | ND   | ND   |
| <i>Serpinb1a</i> | Leukocyte elastase inhibitor A                                | 5   | 1  | 0.78 | 0.78 | 6   | 1  | 0.78 | 0.85 |
| <i>Serpinb5</i>  | serpin B5                                                     | 121 | 12 | 0.91 | 0.93 | 87  | 8  | 0.94 | 0.90 |
| <i>Serpinb6a</i> | serpin B6 isoform b                                           | 25  | 5  | 0.93 | 0.98 | 24  | 6  | 0.90 | 1.10 |
| <i>Serpinb8</i>  | Serpin B8 isoform 1                                           | 4   | 1  | 1.90 | 1.73 | ND  | ND | ND   | ND   |
| <i>Serpinb8</i>  | serpin B8 isoform 2                                           | 3   | 1  | 0.96 | 0.86 | ND  | ND | ND   | ND   |
| <i>Serpinb9</i>  | serine (or cysteine) proteinase inhibitor, clade B, member 9  | 1   | 1  | 0.86 | 1.02 | 1   | 1  | 1.05 | 1.06 |
| <i>Serpinc1</i>  | antithrombin-III                                              | 6   | 1  | 0.78 | 0.51 | 3   | 2  | 1.32 | 1.05 |
| <i>Serpinf1</i>  | Pigment epithelium-derived factor                             | 103 | 8  | 0.92 | 0.84 | 88  | 7  | 0.95 | 0.79 |
| <i>Serpinh1</i>  | Serpin H1                                                     | 45  | 2  | 0.83 | 1.06 | 47  | 2  | 0.93 | 1.08 |
| <i>Sf1</i>       | Splicing factor 1 isoform 2                                   | 4   | 1  | 1.05 | 0.93 | ND  | ND | ND   | ND   |
| <i>Sf3a1</i>     | Splicing factor 3 subunit 1                                   | 2   | 1  | 0.98 | 0.92 | 2   | 1  | 1.08 | 1.03 |

|                 |                                                                   |     |    |      |      |     |    |      |      |
|-----------------|-------------------------------------------------------------------|-----|----|------|------|-----|----|------|------|
| <i>Sf3b1</i>    | Splicing factor 3B subunit 1                                      | 7   | 3  | 0.94 | 1.12 | 5   | 1  | 0.58 | 0.04 |
| <i>Sf3b2</i>    | splicing factor 3b, subunit 2                                     | 1   | 1  | 0.99 | 0.91 | 1   | 1  | 0.85 | 0.80 |
| <i>Sf3b3</i>    | splicing factor 3B subunit 3                                      | 25  | 6  | 0.93 | 0.93 | 25  | 5  | 0.94 | 0.89 |
| <i>Sf3b4</i>    | splicing factor 3B subunit 4                                      | 2   | 1  | 0.72 | 0.87 | ND  | ND | ND   | ND   |
| <i>Sfn</i>      | 14-3-3 Protein sigma                                              | 239 | 8  | 0.84 | 0.89 | 178 | 5  | 0.80 | 0.86 |
| <i>Sfxn3</i>    | Sideroflexin-3                                                    | 21  | 4  | 1.07 | 1.04 | 23  | 4  | 1.05 | 1.03 |
| <i>Sgpl1</i>    | sphingosine-1-phosphate lyase 1                                   | 7   | 1  | 1.00 | 0.94 | 8   | 2  | 1.13 | 1.16 |
| <i>Sgta</i>     | small glutamine-rich tetratricopeptide repeat-containing protein  | 9   | 3  | 1.10 | 1.33 | 3   | 2  | 1.20 | 1.20 |
| <i>Sh3bgrl3</i> | SH3 domain-binding glutamic acid-rich-like protein 3              | 25  | 2  | 0.82 | 0.86 | 14  | 2  | 0.75 | 0.81 |
| <i>Sh3bp1</i>   | SH3 domain-binding protein 1                                      | 8   | 2  | 0.64 | 0.43 | 6   | 1  | 1.00 | 0.73 |
| <i>Sh3gl1</i>   | endophilin-A2                                                     | 12  | 2  | 1.08 | 0.96 | ND  | ND | ND   | ND   |
| <i>Sh3gl2</i>   | endophilin-A1                                                     | 21  | 5  | 1.14 | 0.92 | 12  | 3  | 0.87 | 0.98 |
| <i>Sh3glb1</i>  | endophilin-B1                                                     | 1   | 1  | ND   | ND   | 6   | 1  | 0.91 | 0.30 |
| <i>Shmt2</i>    | serine hydroxymethyltransferase 2 (mitochondrial)                 | 4   | 2  | 1.40 | 1.36 | ND  | ND | ND   | ND   |
| <i>Sirt2</i>    | NAD-dependent deacetylase sirtuin-2 isoform 2                     | 1   | 1  | 1.08 | 1.01 | ND  | ND | ND   | ND   |
| <i>Sirt5</i>    | NAD-dependent deacetylase sirtuin-5                               | 1   | 1  | 1.06 | 1.15 | ND  | ND | ND   | ND   |
| <i>Skp1a</i>    | S-phase kinase-associated protein 1                               | 1   | 1  | 1.41 | 0.88 | ND  | ND | ND   | ND   |
| <i>Slc12a1</i>  | Solute carrier family 12 member 1 isoform A                       | 1   | 1  | ND   | ND   | 1   | 1  | 0.00 | 0.00 |
| <i>Slc12a2</i>  | Solute carrier family 12 member 2                                 | 2   | 2  | 0.80 | 0.96 | 3   | 2  | 1.08 | 7.88 |
| <i>Slc25a11</i> | mitochondrial 2-oxoglutarate/malate carrier protein               | 3   | 2  | 1.12 | 0.86 | 2   | 1  | 0.89 | 1.33 |
| <i>Slc25a12</i> | calcium-binding mitochondrial carrier protein Aralar1             | 3   | 2  | 1.03 | 0.99 | 4   | 2  | 0.85 | 1.09 |
| <i>Slc25a13</i> | calcium-binding mitochondrial carrier protein Aralar2             | 2   | 2  | 0.95 | 0.99 | ND  | ND | ND   | ND   |
| <i>Slc25a24</i> | calcium-binding mitochondrial carrier protein SCaMC-1             | 3   | 2  | 0.12 | 0.19 | 2   | 2  | 0.77 | 0.77 |
| <i>Slc25a35</i> | solute carrier family 25 member 35                                | 1   | 1  | 0.90 | 1.06 | ND  | ND | ND   | ND   |
| <i>Slc25a4</i>  | ADP/ATP translocase 1                                             | 140 | 10 | 1.09 | 0.98 | 108 | 8  | 1.07 | 1.02 |
| <i>Slc25a5</i>  | ADP/ATP translocase 2                                             | 154 | 9  | 0.98 | 0.95 | 131 | 7  | 0.96 | 0.96 |
| <i>Slc27a4</i>  | long-chain fatty acid transport protein 4                         | 1   | 1  | 1.18 | 1.40 | ND  | ND | ND   | ND   |
| <i>Slc2a1</i>   | Solute carrier family 2, facilitated glucose transporter member 1 | 1   | 1  | 1.14 | 0.92 | ND  | ND | ND   | ND   |
| <i>Slc30a7</i>  | Zinc transporter 7                                                | 1   | 1  | 1.12 | 1.04 | ND  | ND | ND   | ND   |
| <i>Slc3a2</i>   | 4F2 cell-surface antigen heavy chain isoform b                    | 2   | 1  | 0.92 | 0.66 | ND  | ND | ND   | ND   |
| <i>Slc44a2</i>  | choline transporter-like protein 2                                | 3   | 1  | 1.08 | 1.07 | ND  | ND | ND   | ND   |
| <i>Slc4a4</i>   | Electrogenic sodium bicarbonate cotransporter 1 isoform a         | 1   | 1  | 0.87 | 0.99 | ND  | ND | ND   | ND   |
| <i>Slc9a3r1</i> | na(+)/H(+) exchange regulatory cofactor NHE-RF1                   | 6   | 2  | 0.97 | 1.04 | ND  | ND | ND   | ND   |
| <i>Slk</i>      | STE20-like serine/threonine-protein kinase isoform 2              | 4   | 2  | 1.18 | 1.14 | 1   | 1  | 0.01 | 2.10 |

|                |                                                             |    |   |      |      |    |    |      |      |
|----------------|-------------------------------------------------------------|----|---|------|------|----|----|------|------|
| <i>Smad3</i>   | mothers against decapentaplegic homolog 3                   | 1  | 1 | 0.97 | 0.99 | ND | ND | ND   | ND   |
| <i>Smarca2</i> | probable global transcription activator SNF2L2 isoform 2    | 1  | 1 | 1.07 | 1.09 | ND | ND | ND   | ND   |
| <i>Smarca4</i> | transcription activator BRG1                                | 8  | 2 | 1.09 | 1.10 | 3  | 2  | 1.12 | 0.83 |
| <i>Smarca5</i> | SWI/SNF-related matrix-associated actin-dependent regulator | 6  | 2 | 0.85 | 0.79 | 3  | 1  | 1.01 | 0.94 |
| <i>Smarca1</i> | SWI/SNF-related matrix-associated actin-dependent regulator | 7  | 2 | 1.04 | 1.04 | ND | ND | ND   | ND   |
| <i>Smarcc2</i> | SWI/SNF complex subunit SMARCC2 isoform 3                   | 1  | 1 | 1.16 | 0.92 | 3  | 1  | 1.19 | 1.01 |
| <i>Smarcd2</i> | SWI/SNF-related matrix-associated actin-dependent regulator | 3  | 2 | 0.90 | 1.02 | ND | ND | ND   | ND   |
| <i>Smc1a</i>   | structural maintenance of chromosomes protein 1A            | 1  | 1 | ND   | ND   | ND | ND | ND   | ND   |
| <i>Smc3</i>    | structural maintenance of chromosomes protein 3             | 6  | 3 | 0.87 | 1.29 | 2  | 1  | 0.87 | 0.69 |
| <i>Smchd1</i>  | Structural maintenance of chromosomes flexible hinge domain | 2  | 1 | 0.85 | 0.88 | 3  | 1  | 0.87 | 0.91 |
| <i>Snap23</i>  | synaptosomal-associated protein 23                          | 3  | 1 | 0.69 | 0.97 | ND | ND | ND   | ND   |
| <i>Snap47</i>  | synaptosomal-associated protein 47                          | 2  | 1 | 1.10 | 1.03 | ND | ND | ND   | ND   |
| <i>Sncg</i>    | synuclein, gamma                                            | 2  | 1 | 0.88 | 0.86 | ND | ND | ND   | ND   |
| <i>Snd1</i>    | staphylococcal nuclease domain-containing protein 1         | 20 | 7 | 0.99 | 0.93 | 15 | 4  | 0.94 | 0.89 |
| <i>Snf8</i>    | Vacuolar-sorting protein SNF8                               | 3  | 1 | 1.03 | 1.10 | 3  | 1  | 1.16 | 1.15 |
| <i>Snmp200</i> | U5 snRNP-specific protein, 200 kDa                          | 19 | 5 | 1.19 | 1.13 | 6  | 3  | 1.10 | 1.23 |
| <i>Snmp70</i>  | U1 small nuclear ribonucleoprotein 70 kDa                   | 2  | 1 | 0.88 | 0.92 | ND | ND | ND   | ND   |
| <i>Snrpa</i>   | U1 small nuclear ribonucleoprotein A                        | 10 | 2 | 0.95 | 0.89 | 2  | 1  | ND   | ND   |
| <i>Snrpa1</i>  | U2 small nuclear ribonucleoprotein A'                       | 11 | 2 | 0.85 | 0.89 | 8  | 3  | 0.98 | 1.10 |
| <i>Snrpb</i>   | small nuclear ribonucleoprotein-associated protein B        | 13 | 2 | 0.88 | 0.81 | 7  | 2  | 0.86 | 0.86 |
| <i>Snrpd2</i>  | small nuclear ribonucleoprotein Sm D2                       | 8  | 1 | 1.18 | 1.07 | 9  | 2  | 1.03 | 1.14 |
| <i>Snrpd3</i>  | Small nuclear ribonucleoprotein Sm D3                       | 6  | 1 | 0.96 | 0.97 | 10 | 2  | 1.02 | 0.90 |
| <i>Snrpe</i>   | small nuclear ribonucleoprotein E                           | 6  | 1 | 1.04 | 0.98 | 11 | 1  | 1.01 | 0.99 |
| <i>Sntb2</i>   | beta-2-syntrophin                                           | 3  | 1 | 1.03 | 0.90 | 2  | 1  | 1.01 | 1.09 |
| <i>Snx1</i>    | sorting nexin-1                                             | 5  | 2 | 0.90 | 0.88 | 3  | 2  | 1.02 | 1.02 |
| <i>Snx12</i>   | Sorting nexin-12 isoform 1                                  | 10 | 1 | 1.11 | 1.17 | 1  | 1  | 0.94 | 1.07 |
| <i>Snx2</i>    | Sorting nexin-2                                             | 13 | 4 | 0.99 | 1.14 | 29 | 4  | 1.07 | 1.09 |
| <i>Snx3</i>    | sorting nexin-3                                             | 5  | 1 | 0.91 | 0.79 | 5  | 2  | 0.95 | 0.75 |
| <i>Snx5</i>    | sorting nexin-5                                             | 5  | 1 | 0.97 | 0.96 | 5  | 1  | 0.85 | 0.83 |
| <i>Sod1</i>    | superoxide dismutase                                        | 14 | 1 | 1.22 | 1.86 | 12 | 1  | 1.32 | 2.04 |
| <i>Sod2</i>    | superoxide dismutase [Mn], mitochondrial                    | 10 | 2 | 1.00 | 1.05 | 9  | 2  | 0.94 | 1.06 |
| <i>Sod3</i>    | extracellular superoxide dismutase                          | 6  | 1 | 1.11 | 1.14 | 9  | 1  | 1.00 | 0.86 |
| <i>Sorbs1</i>  | sorbin and SH3 domain-containing protein 1 isoform 1        | 3  | 2 | 0.86 | 1.04 | ND | ND | ND   | ND   |
| <i>Sord</i>    | sorbitol dehydrogenase                                      | 10 | 2 | 0.95 | 1.02 | 9  | 2  | 0.93 | 0.95 |



|                |                                                       |     |    |       |      |     |    |      |      |
|----------------|-------------------------------------------------------|-----|----|-------|------|-----|----|------|------|
| <i>Sorl1</i>   | Sortilin-related receptor                             | 2   | 1  | 0.66  | 0.63 | ND  | ND | ND   | ND   |
| <i>Sost</i>    | sclerostin                                            | 1   | 1  | ND    | ND   | ND  | ND | ND   | ND   |
| <i>Sp1</i>     | Transcription factor Sp1                              | 2   | 2  | 1.42  | 2.20 | ND  | ND | ND   | ND   |
| <i>Sp3</i>     | Transcription factor Sp3 isoform 2                    | 3   | 1  | 3.32  | 2.12 | ND  | ND | ND   | ND   |
| <i>Spcs2</i>   | Signal peptidase complex subunit 2                    | 3   | 1  | 0.81  | 0.62 | 2   | 1  | 0.80 | 0.79 |
| <i>Sphk2</i>   | sphingosine kinase 2                                  | 1   | 1  | 0.02  | 0.10 | 4   | 1  | 0.86 | 1.11 |
| <i>Spna2</i>   | Spectrin alpha chain, brain                           | 178 | 29 | 0.95  | 0.91 | 130 | 27 | 0.97 | 0.92 |
| <i>Spnb2</i>   | Spectrin beta chain, brain 1 isoform 1                | 124 | 25 | 1.10  | 0.91 | 117 | 25 | 0.98 | 1.01 |
| <i>Spnb2</i>   | Spectrin beta chain, brain 1 isoform 2                | 111 | 24 | 1.29  | 0.95 | ND  | ND | ND   | ND   |
| <i>Spnb3</i>   | spectrin beta 3                                       | 93  | 28 | 0.99  | 1.00 | 98  | 27 | 0.98 | 0.99 |
| <i>Span1</i>   | spondin-1                                             | 13  | 4  | 1.10  | 1.01 | 20  | 6  | 0.99 | 1.05 |
| <i>Spr</i>     | Sepiapterin reductase                                 | 16  | 4  | 0.82  | 0.99 | 19  | 5  | 0.98 | 1.11 |
| <i>Srm</i>     | spermidine synthase                                   | 6   | 4  | 1.03  | 0.96 | 5   | 2  | 1.10 | 1.13 |
| <i>Srp54c</i>  | Signal recognition particle 54C                       | 2   | 1  | 18.42 | 0.86 | ND  | ND | ND   | ND   |
| <i>Srp68</i>   | signal recognition particle 68 kDa protein            | 4   | 1  | 0.92  | 0.39 | ND  | ND | ND   | ND   |
| <i>Srprb</i>   | signal recognition particle receptor subunit beta     | 1   | 1  | 1.28  | 1.81 | ND  | ND | ND   | ND   |
| <i>Srpx</i>    | sushi-repeat-containing protein SRPX                  | 68  | 6  | 1.55  | 1.42 | 58  | 6  | 1.46 | 1.45 |
| <i>Srpx2</i>   | sushi repeat-containing protein SRPX2                 | 19  | 4  | 1.19  | 1.61 | 13  | 4  | 1.10 | 1.44 |
| <i>Srrm1</i>   | serine/arginine repetitive matrix protein 1 isoform 2 | 4   | 2  | 0.81  | 1.23 | 3   | 1  | ND   | ND   |
| <i>Srsf1</i>   | Splicing factor, arginine/serine-rich 1 isoform 2     | 23  | 5  | 1.30  | 1.26 | 13  | 2  | 1.29 | 1.26 |
| <i>Srsf10</i>  | splicing factor, arginine/serine-rich 13A isoform 1   | 4   | 1  | 1.14  | 1.24 | ND  | ND | ND   | ND   |
| <i>Srsf11</i>  | Splicing factor, arginine/serine-rich 11 isoform 1    | 1   | 1  | 0.93  | 1.02 | 2   | 1  | 0.97 | 0.84 |
| <i>Srsf2</i>   | splicing factor, arginine/serine-rich 2               | 46  | 2  | 1.11  | 1.04 | 34  | 2  | 1.10 | 0.98 |
| <i>Srsf4</i>   | Splicing factor, arginine/serine-rich 4               | 2   | 2  | 0.75  | 1.31 | ND  | ND | ND   | ND   |
| <i>Srsf5</i>   | Splicing factor, arginine/serine-rich 5               | 2   | 1  | 0.80  | 0.64 | ND  | ND | ND   | ND   |
| <i>Srsf6</i>   | arginine/serine-rich splicing factor 6                | 1   | 1  | 1.21  | 1.13 | 2   | 2  | 1.13 | 0.96 |
| <i>Srsf7</i>   | splicing factor, arginine/serine-rich 7               | 20  | 3  | 1.02  | 1.09 | 16  | 3  | 1.05 | 0.96 |
| <i>Ssb</i>     | lupus La protein homolog                              | 14  | 4  | 0.93  | 0.81 | 18  | 3  | 0.94 | 0.80 |
| <i>Ssr3</i>    | translocon-associated protein subunit gamma           | 2   | 1  | 1.61  | 1.48 | 2   | 1  | 1.65 | 1.29 |
| <i>Ssr4</i>    | translocon-associated protein subunit delta isoform 2 | 2   | 1  | 1.09  | 1.08 | 1   | 1  | 1.19 | 1.19 |
| <i>St13</i>    | hsc70-interacting protein                             | 12  | 2  | 0.86  | 1.01 | 9   | 2  | 0.85 | 0.96 |
| <i>Stard10</i> | PCTP-like protein                                     | 3   | 1  | 1.05  | 1.35 | ND  | ND | ND   | ND   |
| <i>Stat2</i>   | signal transducer and activator of transcription 2    | 1   | 1  | 1.55  | 1.50 | ND  | ND | ND   | ND   |
| <i>Steap4</i>  | metalloreductase STEAP4                               | 4   | 3  | 0.81  | 0.68 | 1   | 1  | 1.40 | 1.52 |

|                |                                                                |    |   |      |      |    |    |      |      |
|----------------|----------------------------------------------------------------|----|---|------|------|----|----|------|------|
| <i>Stip1</i>   | Stress-induced-phosphoprotein 1                                | 55 | 6 | 0.91 | 0.98 | 64 | 7  | 0.91 | 1.01 |
| <i>Stom</i>    | erythrocyte band 7 integral membrane protein                   | 7  | 2 | 1.19 | 1.09 | 6  | 1  | 1.18 | 1.07 |
| <i>Stoml2</i>  | Stomatin-like protein 2                                        | 6  | 3 | 0.94 | 0.93 | 2  | 1  | 0.30 | 2.18 |
| <i>Strap</i>   | Serine-threonine kinase receptor-associated protein            | 9  | 3 | 0.82 | 0.79 | 6  | 1  | 0.84 | 0.87 |
| <i>Strn</i>    | striatin, calmodulin binding protein                           | 3  | 1 | 0.79 | 1.12 | 8  | 2  | 0.97 | 1.09 |
| <i>Strn3</i>   | striatin-3 isoform 2                                           | 1  | 1 | 1.06 | 1.04 | 1  | 1  | 1.10 | 1.22 |
| <i>Stt3a</i>   | Dolichyl-diphosphooligosaccharide--protein glycosyltransferase | 8  | 2 | 1.82 | 1.31 | ND | ND | ND   | ND   |
| <i>Stt3b</i>   | dolichyl-diphosphooligosaccharide--protein glycosyltransferase | 2  | 1 | 1.08 | 0.05 | ND | ND | ND   | ND   |
| <i>Stx12</i>   | syntaxin-12                                                    | 13 | 4 | 1.30 | 1.09 | 10 | 2  | 0.94 | 0.89 |
| <i>Stx6</i>    | Syntaxin-6                                                     | 1  | 1 | 1.14 | 1.01 | ND | ND | ND   | ND   |
| <i>Stx7</i>    | syntaxin-7                                                     | 5  | 2 | 0.89 | 1.06 | 4  | 2  | 0.93 | 0.97 |
| <i>Sub1</i>    | activated RNA polymerase II transcriptional coactivator p15    | 30 | 3 | 0.99 | 1.11 | 32 | 2  | 0.99 | 1.09 |
| <i>Sucla2</i>  | succinyl-CoA ligase [ADP-forming] subunit beta, mitochondria   | 3  | 2 | 0.91 | 0.91 | 1  | 1  | 0.96 | 1.00 |
| <i>Suclg2</i>  | Succinyl-CoA ligase [GDP-forming] subunit beta, mitochondria   | 8  | 3 | 0.87 | 0.87 | 2  | 1  | 0.90 | 1.02 |
| <i>Sugt1</i>   | suppressor of G2 allele of SKP1 homolog                        | 1  | 1 | 1.31 | 1.13 | ND | ND | ND   | ND   |
| <i>Supt16h</i> | FACT complex subunit SPT16                                     | 1  | 1 | 0.97 | 0.86 | ND | ND | ND   | ND   |
| <i>Supt5h</i>  | suppressor of Ty 5 homolog                                     | 1  | 1 | 0.98 | 0.88 | ND | ND | ND   | ND   |
| <i>Supt6h</i>  | Transcription elongation factor SPT6                           | 1  | 1 | 1.60 | 0.91 | ND | ND | ND   | ND   |
| <i>Syncrip</i> | heterogeneous nuclear ribonucleoprotein Q isoform 2            | 33 | 6 | 1.04 | 0.88 | 22 | 6  | 1.01 | 0.96 |
| <i>Syne2</i>   | Synaptic nuclear envelope 2                                    | 4  | 1 | 1.33 | 0.33 | 8  | 3  | 1.41 | 1.11 |
| <i>Sypl2</i>   | synaptophysin-like protein 2                                   | 2  | 1 | ND   | ND   | ND | ND | ND   | ND   |
| <i>Syt11</i>   | Synaptotagmin-like protein 1                                   | 18 | 5 | 0.97 | 0.99 | 16 | 6  | 0.81 | 0.96 |
| <i>Tacstd2</i> | tumor-associated calcium signal transducer 2                   | 70 | 5 | 1.00 | 0.99 | 59 | 4  | 1.11 | 0.99 |
| <i>Taf15</i>   | TAF15 RNA polymerase II, TATA box binding protein (TBP)-a      | 2  | 1 | 1.58 | 1.38 | 1  | 1  | 1.00 | 1.12 |
| <i>Tagln2</i>  | transgelin-2                                                   | 40 | 6 | 0.97 | 1.04 | 26 | 6  | 0.91 | 0.96 |
| <i>Taldo1</i>  | transaldolase                                                  | 23 | 5 | 1.16 | 1.31 | 17 | 1  | 1.31 | 1.62 |
| <i>Tardbp</i>  | TAR DNA-binding protein 43 isoform 1                           | 17 | 3 | 0.93 | 1.13 | 14 | 3  | 0.87 | 0.91 |
| <i>Tars</i>    | threonyl-tRNA synthetase, cytoplasmic                          | 10 | 2 | 1.06 | 1.00 | 5  | 2  | 1.03 | 1.00 |
| <i>Tatdn1</i>  | putative deoxyribonuclease TATDN1                              | 2  | 1 | ND   | ND   | 1  | 1  | 0.97 | 1.04 |
| <i>Tbcb</i>    | tubulin-folding cofactor B                                     | 6  | 2 | 1.13 | 0.42 | 5  | 2  | 1.01 | 1.39 |
| <i>Tbcd</i>    | tubulin-specific chaperone D                                   | 2  | 2 | 1.08 | 1.39 | 3  | 2  | 1.14 | 1.46 |
| <i>Tcea1</i>   | transcription elongation factor A protein 1 isoform 3          | 2  | 1 | 1.23 | 0.94 | ND | ND | ND   | ND   |
| <i>Tceb2</i>   | Transcription elongation factor B polypeptide 2                | 6  | 1 | 1.08 | 1.08 | 3  | 1  | 0.97 | 1.01 |
| <i>Tcn2</i>    | transcobalamin-2                                               | 3  | 1 | 1.21 | 1.11 | 2  | 1  | 1.27 | 1.33 |

|                  |                                                              |      |    |      |      |      |    |      |      |
|------------------|--------------------------------------------------------------|------|----|------|------|------|----|------|------|
| <i>Tcp1</i>      | T-complex protein 1 subunit alpha B                          | 86   | 12 | 0.93 | 0.93 | 58   | 8  | 0.98 | 0.99 |
| <i>Tdrd1</i>     | tudor domain-containing protein 1                            | 1    | 1  | 0.75 | 3.44 | ND   | ND | ND   | ND   |
| <i>Tecpr1</i>    | Tectonin beta-propeller repeat-containing protein 1          | 2    | 1  | 1.18 | 1.01 | ND   | ND | ND   | ND   |
| <i>Tecr</i>      | trans-2,3-enoyl-CoA reductase isoform 2                      | 4    | 1  | 1.57 | 1.47 | 2    | 1  | 1.52 | 1.34 |
| <i>Tfg</i>       | Trk-fused                                                    | 2    | 1  | ND   | ND   | 7    | 2  | 0.82 | 0.20 |
| <i>Tgfb1</i>     | transforming growth factor-beta-induced protein ig-h3        | 471  | 13 | 2.02 | 1.63 | 571  | 14 | 2.00 | 1.56 |
| <i>Tgm2</i>      | protein-glutamine gamma-glutamyltransferase 2                | 187  | 15 | 1.02 | 1.13 | 167  | 13 | 1.02 | 1.18 |
| <i>Thbs1</i>     | thrombospondin-1                                             | 15   | 8  | 1.28 | 1.06 | 11   | 4  | 1.23 | 0.99 |
| <i>Thbs2</i>     | thrombospondin 2                                             | 4    | 3  | 0.98 | 1.29 | 3    | 2  | 1.00 | 1.16 |
| <i>Thbs3</i>     | thrombospondin-3                                             | 15   | 2  | 1.21 | 0.93 | 14   | 2  | 1.05 | 0.80 |
| <i>Thbs4</i>     | thrombospondin-4                                             | 363  | 15 | 1.77 | 1.27 | 323  | 15 | 1.94 | 1.22 |
| <i>Thoc2</i>     | THO complex subunit 2                                        | 3    | 1  | 1.18 | 1.23 | ND   | ND | ND   | ND   |
| <i>Thoc4</i>     | THO complex subunit 4                                        | 13   | 3  | 0.83 | 0.89 | 9    | 1  | 0.91 | 0.92 |
| <i>Thop1</i>     | thimet oligopeptidase                                        | 1    | 1  | 1.03 | 1.07 | ND   | ND | ND   | ND   |
| <i>Tinagl1</i>   | tubulointerstitial nephritis antigen-like                    | 2    | 2  | 2.34 | 2.34 | 2    | 2  | 1.42 | 1.31 |
| <i>Tjp1</i>      | tight junction protein ZO-1 isoform 2                        | 4    | 3  | 0.84 | 0.87 | 3    | 2  | 0.90 | 0.92 |
| <i>Tjp2</i>      | Tight junction protein ZO-2                                  | 16   | 6  | 0.93 | 0.91 | 7    | 3  | 0.87 | 1.10 |
| <i>Tjp3</i>      | Tight junction protein ZO-3                                  | 2    | 1  | 1.19 | 0.84 | ND   | ND | ND   | ND   |
| <i>Tkt</i>       | transketolase                                                | 1167 | 17 | 0.88 | 0.99 | 1517 | 13 | 0.89 | 1.01 |
| <i>Tln1</i>      | talin-1                                                      | 47   | 12 | 1.02 | 0.85 | 25   | 9  | 1.11 | 0.94 |
| <i>Tm9sf3</i>    | transmembrane protein 9 superfamily member 3                 | 2    | 1  | 1.75 | 1.61 | 2    | 1  | 1.37 | 1.60 |
| <i>Tm9sf4</i>    | transmembrane 9 superfamily member 4                         | 2    | 1  | 1.48 | 1.44 | ND   | ND | ND   | ND   |
| <i>Tmed10</i>    | transmembrane emp24 domain-containing protein 10             | 11   | 2  | 1.35 | 0.84 | 23   | 2  | 1.08 | 0.90 |
| <i>Tmed4</i>     | transmembrane emp24 domain-containing protein 4              | 6    | 2  | 1.76 | 1.70 | 7    | 1  | 1.41 | 1.64 |
| <i>Tmed9</i>     | Transmembrane emp24 domain-containing protein 9              | 9    | 3  | 1.53 | 1.45 | ND   | ND | ND   | ND   |
| <i>Tmem14c</i>   | Transmembrane protein 14C                                    | 2    | 1  | 1.42 | 1.44 | 6    | 2  | 1.60 | 1.40 |
| <i>Tmem165</i>   | Transmembrane protein 165                                    | 2    | 1  | 0.72 | 0.82 | 4    | 2  | 2.29 | 2.55 |
| <i>Tmem205</i>   | transmembrane protein 205                                    | 2    | 1  | 1.28 | 1.45 | 4    | 1  | 1.18 | 1.15 |
| <i>Tmem43</i>    | transmembrane protein 43                                     | 14   | 3  | 0.86 | 0.98 | 12   | 3  | 0.71 | 0.80 |
| <i>Tmod3</i>     | tropomodulin-3                                               | 10   | 4  | 0.85 | 0.83 | 11   | 3  | 0.84 | 0.80 |
| <i>Tmpo</i>      | Lamina-associated polypeptide 2, isoforms alpha/zeta isoform | 38   | 6  | 1.26 | 1.38 | 24   | 5  | 1.00 | 0.87 |
| <i>Tmpo</i>      | Lamina-associated polypeptide 2, isoforms alpha/zeta isoform | 34   | 5  | 1.24 | 1.04 | ND   | ND | ND   | ND   |
| <i>Tmpo</i>      | Lamina-associated polypeptide 2, isoforms alpha/zeta isoform | 40   | 4  | 1.43 | 1.25 | ND   | ND | ND   | ND   |
| <i>Tmprss11a</i> | transmembrane protease, serine 11A                           | 3    | 2  | 1.14 | 1.16 | 4    | 3  | 1.03 | 1.05 |

|                    |                                                            |     |    |      |      |     |    |      |      |
|--------------------|------------------------------------------------------------|-----|----|------|------|-----|----|------|------|
| <i>Tmprss11bnl</i> | Transmembrane protease, serine 11B                         | 5   | 2  | 0.94 | 0.82 | 2   | 1  | 1.24 | 0.98 |
| <i>Tmprss13</i>    | Transmembrane protease, serine 13                          | 1   | 1  | ND   | ND   | ND  | ND | ND   | ND   |
| <i>Tmtc3</i>       | Transmembrane and TPR repeat-containing protein 3 isoform  | 3   | 1  | 1.20 | 1.11 | 1   | 1  | 1.32 | 1.33 |
| <i>Tmub1</i>       | Transmembrane and ubiquitin-like domain-containing protein | 1   | 1  | ND   | ND   | ND  | ND | ND   | ND   |
| <i>Tmx1</i>        | thioredoxin-related transmembrane protein 1                | 2   | 1  | 1.08 | 1.11 | ND  | ND | ND   | ND   |
| <i>Tmx3</i>        | Protein disulfide-isomerase TMX3                           | 3   | 1  | 0.59 | 0.57 | 2   | 1  | 0.52 | 0.65 |
| <i>Tnks1bp1</i>    | 182 kDa tankyrase-1-binding protein                        | 18  | 7  | 1.06 | 1.16 | 13  | 3  | 1.17 | 0.96 |
| <i>Tnmd</i>        | Tenomodulin                                                | 3   | 1  | 3.56 | 1.86 | 2   | 1  | 2.51 | 1.58 |
| <i>Tnpo1</i>       | Transportin-1 isoform 2                                    | 2   | 1  | 0.99 | 0.92 | 1   | 1  | 1.07 | 1.12 |
| <i>Tollip</i>      | Toll-interacting protein                                   | 6   | 1  | 1.02 | 0.97 | 6   | 1  | 1.06 | 1.04 |
| <i>Tom111</i>      | TOM1-like protein 1                                        | 1   | 1  | 0.76 | 0.81 | ND  | ND | ND   | ND   |
| <i>Tom112</i>      | TOM1-like protein 2 isoform c                              | 2   | 1  | 1.29 | 0.14 | ND  | ND | ND   | ND   |
| <i>Tomm22</i>      | mitochondrial import receptor subunit TOM22 homolog        | 3   | 2  | 0.01 | 1.62 | 3   | 2  | 1.06 | 0.89 |
| <i>Tomm34</i>      | Mitochondrial import receptor subunit TOM34                | 9   | 4  | 1.11 | 1.23 | 10  | 2  | 1.01 | 1.06 |
| <i>Tomm40</i>      | Mitochondrial import receptor subunit TOM40 homolog        | 5   | 2  | 0.88 | 0.88 | ND  | ND | ND   | ND   |
| <i>Tomm70a</i>     | mitochondrial import receptor subunit TOM70                | 4   | 2  | 0.87 | 0.78 | 5   | 2  | 1.01 | 0.82 |
| <i>Top2b</i>       | DNA topoisomerase 2-beta                                   | 6   | 3  | 1.20 | 1.08 | ND  | ND | ND   | ND   |
| <i>Tpd52</i>       | tumor protein D52 isoform 5                                | 18  | 2  | 1.01 | 0.89 | 17  | 1  | 0.77 | 0.73 |
| <i>Tpd52l2</i>     | tumor protein D54                                          | 32  | 3  | 1.01 | 1.07 | 27  | 2  | 0.84 | 1.01 |
| <i>Tpi1</i>        | triosephosphate isomerase                                  | 79  | 4  | 1.03 | 1.00 | 62  | 3  | 0.97 | 1.01 |
| <i>Tpm1</i>        | tropomyosin alpha-1 chain isoform 9                        | 12  | 4  | 0.97 | 0.87 | ND  | ND | ND   | ND   |
| <i>Tpm1</i>        | tropomyosin alpha-1 chain isoform 10                       | 12  | 4  | 1.08 | 1.00 | 7   | 2  | 1.02 | 1.06 |
| <i>Tpm2</i>        | Tropomyosin beta chain                                     | 24  | 3  | 0.90 | 0.99 | ND  | ND | ND   | ND   |
| <i>Tpm3</i>        | tropomyosin alpha-3 chain                                  | 49  | 4  | 1.02 | 0.96 | 40  | 3  | 0.94 | 0.96 |
| <i>Tpm4</i>        | tropomyosin alpha-4 chain                                  | 14  | 3  | 1.01 | 0.95 | 16  | 2  | 1.02 | 1.00 |
| <i>Tpp2</i>        | tripeptidyl-peptidase 2                                    | 3   | 1  | 1.01 | 1.84 | 1   | 1  | 0.87 | 1.53 |
| <i>Tppp</i>        | tubulin polymerization-promoting protein                   | 3   | 1  | 1.96 | 1.02 | ND  | ND | ND   | ND   |
| <i>Tpr</i>         | nuclear pore complex-associated protein Tpr                | 2   | 2  | 0.86 | 0.94 | ND  | ND | ND   | ND   |
| <i>Tra2a</i>       | Transformer-2 protein homolog alpha                        | 2   | 1  | 0.99 | 1.35 | ND  | ND | ND   | ND   |
| <i>Tra2b</i>       | transformer-2 protein homolog beta                         | 16  | 2  | 1.02 | 0.82 | 23  | 2  | 1.07 | 0.95 |
| <i>Trap1</i>       | Heat shock protein 75 kDa, mitochondrial                   | 73  | 2  | 0.91 | 0.93 | ND  | ND | ND   | ND   |
| <i>Trappc3</i>     | trafficking protein particle complex subunit 3             | 1   | 1  | 1.19 | 1.15 | ND  | ND | ND   | ND   |
| <i>Trf</i>         | serotransferrin                                            | 149 | 16 | 0.94 | 0.56 | 134 | 12 | 0.90 | 0.69 |
| <i>Trim25</i>      | E3 ubiquitin/ISG15 ligase TRIM25                           | 6   | 2  | 1.02 | 1.02 | 1   | 1  | 1.01 | 1.08 |

|                |                                                               |     |    |      |      |     |    |      |      |
|----------------|---------------------------------------------------------------|-----|----|------|------|-----|----|------|------|
| <i>Trim28</i>  | transcription intermediary factor 1-beta                      | 47  | 6  | 0.91 | 0.92 | 49  | 6  | 0.90 | 0.92 |
| <i>Trim29</i>  | Tripartite motif-containing protein 29                        | 67  | 8  | 0.95 | 0.88 | 45  | 7  | 0.92 | 0.90 |
| <i>Trove2</i>  | 60 kDa SS-A/Ro ribonucleoprotein                              | 1   | 1  | 0.85 | 0.88 | ND  | ND | ND   | ND   |
| <i>Trp63</i>   | tumor protein 63 isoform h                                    | 2   | 1  | 0.97 | 0.90 | 3   | 1  | 1.03 | 0.95 |
| <i>Tsc22d4</i> | TSC22 domain family protein 4                                 | 1   | 1  | 1.22 | 1.28 | ND  | ND | ND   | ND   |
| <i>Tsg101</i>  | Tumor susceptibility gene 101 protein                         | 7   | 1  | 0.96 | 1.05 | 4   | 1  | 0.99 | 0.97 |
| <i>Tsk3</i>    | testis-specific serine/threonine-protein kinase 3             | 1   | 1  | 0.19 | 0.27 | ND  | ND | ND   | ND   |
| <i>Tst</i>     | thiosulfate sulfurtransferase                                 | 1   | 1  | 0.97 | 1.21 | ND  | ND | ND   | ND   |
| <i>Tsta3</i>   | GDP-L-fucose synthetase                                       | 1   | 1  | 1.69 | 1.33 | 1   | 1  | 1.24 | 1.37 |
| <i>Ttc15</i>   | tetratricopeptide repeat protein 15 isoform 1                 | 1   | 1  | 0.96 | 1.19 | ND  | ND | ND   | ND   |
| <i>Ttc38</i>   | Tetratricopeptide repeat protein 38                           | 18  | 4  | 0.79 | 1.07 | 6   | 1  | 0.86 | 1.14 |
| <i>Ttl12</i>   | tubulin--tyrosine ligase-like protein 12                      | 6   | 3  | 1.16 | 1.13 | 2   | 2  | 1.07 | 1.00 |
| <i>Ttl2</i>    | Probable tubulin polyglutamylase TTL2                         | 1   | 1  | 2.08 | 1.95 | ND  | ND | ND   | ND   |
| <i>Tuba1a</i>  | tubulin alpha-1A chain                                        | 217 | 10 | 1.45 | 1.50 | 270 | 8  | 0.90 | 0.94 |
| <i>Tuba1b</i>  | tubulin alpha-1B chain                                        | 236 | 10 | ND   | ND   | 280 | 8  | 1.01 | 1.04 |
| <i>Tuba1c</i>  | tubulin alpha-1C chain                                        | 219 | 10 | 1.38 | 1.43 | 270 | 8  | 0.85 | 0.73 |
| <i>Tuba4a</i>  | tubulin alpha-4A chain                                        | 133 | 7  | 1.25 | 1.09 | 141 | 7  | 1.01 | 0.96 |
| <i>Tubb2b</i>  | tubulin beta-2B chain                                         | 262 | 12 | 0.81 | 1.31 | 225 | 11 | 1.15 | 1.10 |
| <i>Tubb2c</i>  | tubulin beta-2C chain                                         | 324 | 13 | 0.97 | 1.19 | 285 | 13 | 0.95 | 1.27 |
| <i>Tubb3</i>   | Tubulin beta-3 chain                                          | 242 | 10 | 0.67 | 0.78 | 249 | 9  | 0.00 | 0.00 |
| <i>Tubb4</i>   | tubulin beta-4 chain                                          | 314 | 12 | 0.97 | 1.18 | 279 | 12 | 0.94 | 1.10 |
| <i>Tubb5</i>   | tubulin beta-5 chain                                          | 357 | 14 | 1.01 | 0.93 | 301 | 12 | 1.08 | 0.92 |
| <i>Tubb6</i>   | tubulin beta-6 chain                                          | 128 | 7  | ND   | ND   | 157 | 6  | 0.72 | 0.71 |
| <i>Tuft1</i>   | tuftelin                                                      | 2   | 1  | 1.09 | 0.91 | ND  | ND | ND   | ND   |
| <i>Twf1</i>    | twinfilin-1                                                   | 11  | 2  | 0.95 | 0.97 | 13  | 2  | 1.05 | 1.00 |
| <i>Txn1</i>    | thioredoxin                                                   | 46  | 3  | 1.75 | 1.86 | 21  | 3  | 2.07 | 1.82 |
| <i>Txndc12</i> | Thioredoxin domain-containing protein 12                      | 2   | 1  | 1.02 | 0.98 | ND  | ND | ND   | ND   |
| <i>Txndc17</i> | Thioredoxin domain-containing protein 17                      | 61  | 3  | 0.94 | 1.14 | 33  | 3  | 3.35 | 2.78 |
| <i>Txndc5</i>  | thioredoxin domain-containing protein 5                       | 15  | 3  | 0.97 | 0.81 | 17  | 3  | 1.02 | 0.91 |
| <i>Txn11</i>   | thioredoxin-like protein 1                                    | 5   | 2  | 0.85 | 0.86 | 4   | 2  | 1.03 | 0.94 |
| <i>U2af2</i>   | Splicing factor U2AF 65 kDa subunit                           | 7   | 3  | 0.81 | 0.91 | 7   | 2  | 0.89 | 0.82 |
| <i>Uaca</i>    | uveal autoantigen with coiled-coil domains and ankyrin repeat | 3   | 1  | 0.80 | 0.88 | ND  | ND | ND   | ND   |
| <i>Uap111</i>  | UDP-N-acetylhexosamine pyrophosphorylase-like protein 1       | 1   | 1  | 1.14 | 1.38 | ND  | ND | ND   | ND   |
| <i>Uba1</i>    | ubiquitin-like modifier-activating enzyme 1 isoform 1         | 158 | 12 | 0.98 | 1.12 | 149 | 11 | 0.98 | 1.10 |

|               |                                                            |     |   |      |      |     |    |      |      |
|---------------|------------------------------------------------------------|-----|---|------|------|-----|----|------|------|
| <i>Uba2</i>   | SUMO-activating enzyme subunit 2                           | 6   | 2 | 0.96 | 1.05 | 4   | 2  | 0.91 | 0.88 |
| <i>Uba3</i>   | NEDD8-activating enzyme E1 catalytic subunit isoform 2     | 3   | 2 | 0.96 | 0.98 | 2   | 1  | 1.03 | 1.03 |
| <i>Uba6</i>   | ubiquitin-like modifier-activating enzyme 6                | 5   | 3 | 0.88 | 1.10 | 1   | 1  | 1.05 | 0.85 |
| <i>Ubap2l</i> | ubiquitin-associated protein 2-like isoform 5              | 4   | 3 | 1.27 | 1.02 | ND  | ND | ND   | ND   |
| <i>Ubap2l</i> | ubiquitin-associated protein 2-like isoform 1              | 1   | 1 | 0.82 | 0.75 | ND  | ND | ND   | ND   |
| <i>Ubb</i>    | ubiquitin                                                  | 116 | 3 | 0.96 | 1.04 | 124 | 3  | 0.94 | 1.11 |
| <i>Ube2e1</i> | ubiquitin-conjugating enzyme E2 E1                         | 1   | 1 | 1.03 | 1.01 | ND  | ND | ND   | ND   |
| <i>Ube2k</i>  | ubiquitin-conjugating enzyme E2 K                          | 10  | 2 | 2.02 | 1.32 | 9   | 2  | 0.77 | 1.00 |
| <i>Ube2m</i>  | NEDD8-conjugating enzyme Ubc12 isoform 1                   | 7   | 2 | 1.30 | 1.13 | ND  | ND | ND   | ND   |
| <i>Ube2m</i>  | NEDD8-conjugating enzyme Ubc12 isoform 2                   | 1   | 1 | 1.25 | 1.18 | ND  | ND | ND   | ND   |
| <i>Ube2n</i>  | ubiquitin-conjugating enzyme E2 N                          | 22  | 3 | 1.02 | 1.09 | 14  | 2  | 1.04 | 1.14 |
| <i>Ube2r2</i> | Ubiquitin-conjugating enzyme E2 R2                         | 1   | 1 | 1.01 | 1.11 | ND  | ND | ND   | ND   |
| <i>Ube2v1</i> | ubiquitin-conjugating enzyme E2 variant 1                  | 11  | 3 | 1.12 | 1.06 | 17  | 5  | 1.07 | 1.09 |
| <i>Ube2v2</i> | ubiquitin-conjugating enzyme E2 variant 2 isoform 1        | 16  | 5 | 1.05 | 1.10 | ND  | ND | ND   | ND   |
| <i>Ube3a</i>  | ubiquitin-protein ligase E3A isoform 1                     | 2   | 1 | 0.83 | 0.78 | ND  | ND | ND   | ND   |
| <i>Ubqln1</i> | ubiquilin-1 isoform 2                                      | 2   | 1 | 0.94 | 0.67 | 9   | 3  | 1.02 | 1.07 |
| <i>Ubr4</i>   | E3 ubiquitin-protein ligase UBR4                           | 3   | 2 | 0.90 | 1.01 | ND  | ND | ND   | ND   |
| <i>Ubtf</i>   | Nucleolar transcription factor 1 isoform 2                 | 7   | 1 | 0.93 | 0.96 | 3   | 1  | 0.85 | 0.97 |
| <i>Ubxn1</i>  | UBX domain-containing protein 1                            | 4   | 1 | 1.12 | 0.97 | 3   | 2  | 1.11 | 1.07 |
| <i>Ubxn10</i> | UBX domain-containing protein 10                           | 2   | 1 | ND   | ND   | ND  | ND | ND   | ND   |
| <i>Ubxn4</i>  | UBX domain-containing protein 4                            | 3   | 1 | 1.00 | 0.05 | 1   | 1  | 1.17 | 1.28 |
| <i>Uchl3</i>  | Ubiquitin carboxyl-terminal hydrolase isozyme L3           | 9   | 3 | 0.81 | 1.01 | 1   | 1  | 1.03 | 1.11 |
| <i>Uchl5</i>  | ubiquitin carboxyl-terminal hydrolase isozyme L5 isoform 2 | 4   | 2 | 1.47 | 1.09 | ND  | ND | ND   | ND   |
| <i>Ucp3</i>   | mitochondrial uncoupling protein 3                         | 9   | 1 | 2.86 | 2.03 | ND  | ND | ND   | ND   |
| <i>Ufd1l</i>  | ubiquitin fusion degradation protein 1 homolog             | 2   | 2 | 0.97 | 0.99 | ND  | ND | ND   | ND   |
| <i>Ufm1</i>   | Ubiquitin-fold modifier 1                                  | 3   | 1 | 1.47 | 1.03 | 4   | 1  | 0.00 | 0.99 |
| <i>Ugdh</i>   | UDP-glucose 6-dehydrogenase                                | 15  | 5 | 0.82 | 0.83 | 5   | 2  | 0.87 | 0.94 |
| <i>Uggt1</i>  | UDP-glucose:glycoprotein glucosyltransferase 1             | 15  | 3 | 0.93 | 1.06 | 10  | 4  | 0.88 | 0.97 |
| <i>Ugp2</i>   | UTP--glucose-1-phosphate uridylyltransferase               | 6   | 1 | 0.90 | 1.03 | ND  | ND | ND   | ND   |
| <i>Ugt1a9</i> | UDP-glucuronosyltransferase 1-9                            | 7   | 2 | 1.28 | 1.36 | 6   | 1  | 1.21 | 1.20 |
| <i>Unc45a</i> | protein unc-45 homolog A                                   | 9   | 3 | 0.90 | 0.84 | 8   | 3  | 0.95 | 0.84 |
| <i>Upf1</i>   | regulator of nonsense transcripts 1 isoform b              | 10  | 4 | 1.23 | 1.00 | 4   | 3  | 1.11 | 1.13 |
| <i>Upk1b</i>  | uroplakin-1b                                               | 47  | 2 | 0.90 | 0.81 | 47  | 2  | 0.90 | 0.85 |
| <i>Uqcrc1</i> | cytochrome b-c1 complex subunit 1, mitochondrial           | 26  | 3 | 1.35 | 1.36 | 19  | 4  | 1.27 | 1.28 |

|                |                                                           |     |    |      |      |     |    |      |      |
|----------------|-----------------------------------------------------------|-----|----|------|------|-----|----|------|------|
| <i>Uqcrc2</i>  | cytochrome b-c1 complex subunit 2, mitochondrial          | 14  | 3  | 1.01 | 0.91 | 5   | 1  | 1.15 | 1.05 |
| <i>Uqcrfs1</i> | Cytochrome b-c1 complex subunit Rieske, mitochondrial     | 5   | 1  | 0.95 | 0.67 | 3   | 1  | 0.99 | 0.81 |
| <i>Uqcrq</i>   | cytochrome b-c1 complex subunit 8                         | 2   | 1  | 1.36 | 1.29 | 1   | 1  | 1.46 | 1.20 |
| <i>Uso1</i>    | general vesicular transport factor p115                   | 7   | 4  | 1.05 | 1.09 | ND  | ND | ND   | ND   |
| <i>Usp10</i>   | ubiquitin carboxyl-terminal hydrolase 10                  | 11  | 2  | 0.87 | 0.80 | 6   | 2  | 0.81 | 0.85 |
| <i>Usp14</i>   | ubiquitin carboxyl-terminal hydrolase 14 isoform 2        | 7   | 2  | 1.06 | 1.41 | 4   | 2  | 1.03 | 1.32 |
| <i>Usp39</i>   | U4/U6.U5 tri-snRNP-associated protein 2                   | 2   | 1  | 0.97 | 1.03 | 1   | 1  | 0.77 | 0.73 |
| <i>Usp4</i>    | Ubiquitin carboxyl-terminal hydrolase 4                   | 1   | 1  | 0.85 | 0.97 | ND  | ND | ND   | ND   |
| <i>Usp47</i>   | ubiquitin carboxyl-terminal hydrolase 47                  | 2   | 1  | 1.13 | 1.21 | ND  | ND | ND   | ND   |
| <i>Usp5</i>    | ubiquitin carboxyl-terminal hydrolase 5                   | 37  | 8  | 0.99 | 0.94 | 27  | 5  | 0.97 | 1.04 |
| <i>Usp7</i>    | Ubiquitin carboxyl-terminal hydrolase 7                   | 5   | 2  | 1.09 | 1.15 | 1   | 1  | 1.26 | 1.19 |
| <i>Usp9x</i>   | Probable ubiquitin carboxyl-terminal hydrolase FAF-X      | 2   | 1  | 8.52 | 1.16 | ND  | ND | ND   | ND   |
| <i>Utrn</i>    | Utrophin                                                  | 15  | 4  | 0.70 | 0.86 | 12  | 3  | 1.35 | 1.26 |
| <i>Vamp3</i>   | vesicle-associated membrane protein 3                     | 18  | 1  | 0.94 | 1.02 | 14  | 2  | 0.92 | 0.96 |
| <i>Vapb</i>    | vesicle-associated membrane protein-associated protein B  | 4   | 1  | 0.70 | 0.67 | ND  | ND | ND   | ND   |
| <i>Vars</i>    | valyl-tRNA synthetase                                     | 7   | 6  | 1.17 | 0.87 | 4   | 4  | 1.08 | 0.88 |
| <i>Vat1</i>    | synaptic vesicle membrane protein VAT-1 homolog           | 40  | 6  | 0.98 | 1.07 | 27  | 5  | 0.96 | 0.97 |
| <i>Vbp1</i>    | Prefoldin subunit 3                                       | 8   | 1  | 0.80 | 0.87 | 3   | 1  | 0.85 | 0.89 |
| <i>Vcl</i>     | vinculin                                                  | 69  | 17 | 0.99 | 1.03 | 70  | 16 | 0.93 | 1.06 |
| <i>Vcp</i>     | transitional endoplasmic reticulum ATPase                 | 247 | 21 | 0.85 | 1.02 | 246 | 19 | 0.98 | 1.05 |
| <i>Vdac1</i>   | voltage-dependent anion-selective channel protein 1       | 89  | 8  | 1.02 | 0.96 | 47  | 4  | 0.96 | 1.02 |
| <i>Vdac2</i>   | voltage-dependent anion-selective channel protein 2       | 15  | 2  | 0.81 | 0.85 | 7   | 2  | 0.78 | 0.80 |
| <i>Vdac3</i>   | voltage-dependent anion-selective channel protein 3       | 12  | 2  | 0.84 | 0.79 | 8   | 1  | 0.97 | 0.90 |
| <i>Vim</i>     | vimentin                                                  | 245 | 13 | 1.11 | 0.98 | 200 | 13 | 1.03 | 0.92 |
| <i>Vipar</i>   | hypothetical protein LOC104799 isoform b                  | 1   | 1  | 1.56 | 1.36 | ND  | ND | ND   | ND   |
| <i>Vma21</i>   | Vacuolar ATPase assembly integral membrane protein VMA2   | 5   | 1  | 0.87 | 0.88 | 1   | 1  | 0.96 | 0.97 |
| <i>Vps13c</i>  | Vacuolar protein sorting-associated protein 13C           | 6   | 2  | 1.00 | 1.21 | 2   | 1  | 0.72 | 1.13 |
| <i>Vps25</i>   | vacuolar protein-sorting-associated protein 25            | 1   | 1  | 1.01 | 0.82 | 3   | 1  | 0.71 | 1.39 |
| <i>Vps26a</i>  | vacuolar protein sorting-associated protein 26A isoform a | 8   | 2  | 1.00 | 1.27 | 14  | 2  | 0.91 | 1.05 |
| <i>Vps26b</i>  | vacuolar protein sorting-associated protein 26B           | 3   | 1  | 1.01 | 0.91 | ND  | ND | ND   | ND   |
| <i>Vps28</i>   | Vacuolar protein sorting-associated protein 28 homolog    | 1   | 1  | 1.96 | 1.19 | 3   | 2  | 1.56 | 1.63 |
| <i>Vps35</i>   | Vacuolar protein sorting-associated protein 35            | 19  | 4  | 0.99 | 0.86 | 16  | 6  | 1.12 | 1.03 |
| <i>Vps37b</i>  | vacuolar protein sorting-associated protein 37B           | 1   | 1  | ND   | ND   | ND  | ND | ND   | ND   |
| <i>Vps37c</i>  | vacuolar protein sorting-associated protein 37C           | 4   | 2  | 1.24 | 1.50 | ND  | ND | ND   | ND   |

|                |                                                                |     |    |      |      |     |    |      |      |
|----------------|----------------------------------------------------------------|-----|----|------|------|-----|----|------|------|
| <i>Vps45</i>   | vacuolar protein sorting 45                                    | 2   | 1  | 0.91 | 1.10 | ND  | ND | ND   | ND   |
| <i>Vps4a</i>   | vacuolar protein sorting-associated protein 4A                 | 3   | 1  | 1.09 | 1.08 | ND  | ND | ND   | ND   |
| <i>Vsn1</i>    | visinin-like protein 1                                         | 5   | 2  | 1.14 | 1.03 | ND  | ND | ND   | ND   |
| <i>Vta1</i>    | vacuolar protein sorting-associated protein VTA1 homolog       | 1   | 1  | 0.91 | 1.13 | ND  | ND | ND   | ND   |
| <i>Vwa5a</i>   | von Willebrand factor A domain-containing protein 5A           | 58  | 8  | 0.97 | 1.03 | 61  | 8  | 0.95 | 1.05 |
| <i>Wapal</i>   | Wings apart-like protein homolog                               | 4   | 1  | ND   | ND   | ND  | ND | ND   | ND   |
| <i>Wars</i>    | tryptophanyl-tRNA synthetase, cytoplasmic isoform 2            | 2   | 2  | 1.26 | 1.25 | 1   | 1  | 1.17 | 1.22 |
| <i>Wasf2</i>   | wiskott-Aldrich syndrome protein family member 2               | 6   | 1  | 0.99 | 0.80 | 9   | 1  | 0.99 | 0.80 |
| <i>Wdr1</i>    | WD repeat-containing protein 1                                 | 47  | 7  | 1.00 | 1.12 | 56  | 6  | 1.14 | 1.18 |
| <i>Wfs1</i>    | Wolfram syndrome 1 protein homolog                             | 4   | 3  | 0.99 | 0.88 | 3   | 2  | 0.71 | 0.78 |
| <i>Wibg</i>    | partner of Y14 and mago isoform 2                              | 1   | 1  | 1.42 | 1.34 | ND  | ND | ND   | ND   |
| <i>Wt1</i>     | Wilms tumor protein homolog                                    | 3   | 1  | 0.87 | 7.58 | 1   | 1  | 0.87 | 7.29 |
| <i>Xdh</i>     | xanthine dehydrogenase/oxidase                                 | 4   | 1  | 0.99 | 1.08 | 6   | 1  | 1.06 | 0.99 |
| <i>Xpnpep1</i> | xaa-Pro aminopeptidase 1                                       | 6   | 2  | 0.93 | 0.90 | 7   | 4  | 1.06 | 1.14 |
| <i>Xpo1</i>    | exportin-1                                                     | 18  | 3  | 1.18 | 1.15 | 10  | 2  | 1.21 | 1.14 |
| <i>Xrcc1</i>   | DNA repair protein XRCC1                                       | 1   | 1  | 1.01 | 0.89 | ND  | ND | ND   | ND   |
| <i>Xrcc6</i>   | ATP-dependent DNA helicase 2 subunit 1                         | 4   | 1  | 1.09 | 1.39 | ND  | ND | ND   | ND   |
| <i>Yap1</i>    | 65 kDa Yes-associated protein isoform 2                        | 8   | 2  | 1.10 | 1.04 | 5   | 1  | 0.13 | 0.19 |
| <i>Ybx1</i>    | Nuclease-sensitive element-binding protein 1                   | 26  | 3  | 0.84 | 0.86 | 22  | 2  | 1.52 | 1.40 |
| <i>Ykt6</i>    | synaptobrevin homolog YKT6                                     | 3   | 1  | 0.92 | 1.43 | 1   | 1  | 0.62 | 1.05 |
| <i>Ywhab</i>   | 14-3-3 protein beta/alpha                                      | 206 | 7  | 0.85 | 1.01 | 183 | 5  | 0.90 | 0.85 |
| <i>Ywhae</i>   | 14-3-3 protein epsilon                                         | 251 | 10 | 0.83 | 0.93 | 212 | 10 | 0.83 | 0.93 |
| <i>Ywhag</i>   | 3-monooxygenase/tryptophan 5-monooxygenase activation protein  | 219 | 6  | 0.85 | 0.86 | 178 | 4  | 0.89 | 0.94 |
| <i>Ywhah</i>   | 14-3-3 protein eta                                             | 169 | 4  | 1.19 | 1.21 | 144 | 3  | 1.03 | 1.10 |
| <i>Ywhaq</i>   | 14-3-3 protein theta                                           | 234 | 8  | 1.08 | 1.16 | 198 | 6  | 1.11 | 1.21 |
| <i>Ywhaz</i>   | 14-3-3 protein zeta/delta                                      | 363 | 10 | 0.99 | 1.00 | 350 | 9  | 0.94 | 0.99 |
| <i>Zadh2</i>   | zinc-binding alcohol dehydrogenase domain-containing protein 4 | 4   | 2  | 1.01 | 1.06 | 3   | 1  | 1.70 | 1.76 |
| <i>Zc3h15</i>  | zinc finger CCCH domain-containing protein 15                  | 3   | 1  | 1.11 | 0.72 | ND  | ND | ND   | ND   |
| <i>Zc3hav1</i> | zinc finger CCCH-type antiviral protein 1 isoform 2            | 1   | 1  | 1.62 | 1.78 | 3   | 1  | 1.12 | 1.19 |
| <i>Zdhhc5</i>  | probable palmitoyltransferase ZDHHC5                           | 1   | 1  | 0.93 | 0.95 | 1   | 1  | 1.52 | 1.20 |
| <i>Zfp185</i>  | Zinc finger protein 185 isoform b                              | 6   | 2  | 0.87 | 0.90 | 1   | 1  | 1.21 | 1.17 |
| <i>Zfp207</i>  | zinc finger protein 207 isoform 4                              | 3   | 1  | 1.09 | 1.09 | 2   | 1  | 0.98 | 1.08 |
| <i>Zfp324</i>  | zinc finger protein 324                                        | 1   | 1  | 0.89 | 0.89 | ND  | ND | ND   | ND   |
| <i>Zfp329</i>  | zinc finger protein 329                                        | 1   | 1  | ND   | ND   | ND  | ND | ND   | ND   |



|                 |                                |   |   |      |       |   |   |      |      |
|-----------------|--------------------------------|---|---|------|-------|---|---|------|------|
| <i>Zmpste24</i> | CAAX prenyl protease 1 homolog | 2 | 1 | 1.12 | 14.15 | 5 | 1 | 1.23 | 0.90 |
|-----------------|--------------------------------|---|---|------|-------|---|---|------|------|

\* Fold change compared Lum<sup>+/+</sup>; PSM: Peptide spectrum matches; ND: Not detected
