# Supplementary material
Source: PubMed Central journal article supplement (PMC3163732)
Supplement: NIHMS297720-supplement-03.pdf [file NIHMS297720-supplement-03.pdf]

**Shao et al 2011: Proteome profiling of wild type and lumican-deficient mouse corneas**  
**Supplementary Table 2: List of unique peptides identified in wild type and lumican-deficient mouse corneas**

| Sequence                            | # PSMs | Protein Group Accessions                                                                                                                                                           | Modifications                                                        | MH+ [Da]   | IonScore A3 | IonScore A4 | XCorr B3 | XCorr B4 | Expt  |
|-------------------------------------|--------|------------------------------------------------------------------------------------------------------------------------------------------------------------------------------------|----------------------------------------------------------------------|------------|-------------|-------------|----------|----------|-------|
| QAFTDVTATGSLGQGLGAACGMAYTGK         | 119    | 6678359                                                                                                                                                                            | N-Term(iTRAQ4plex), C19(Methylthio), K26(iTRAQ4plex)                 | 2809.36521 | 188         | 150         | 1.18     | 8.55     | Expt1 |
| AIGGGLSSGGLSSSTIK                   | 58     | 54607171;113195684                                                                                                                                                                 | N-Term(iTRAQ4plex), K18(iTRAQ4plex)                                  | 1867.04033 | 171         | 163         |          | 7.17     | Expt1 |
| EIAEAYLGHVPVNAVITVPAYFNDSQR         | 35     | 124339829;124339826                                                                                                                                                                | N-Term(iTRAQ4plex)                                                   | 3119.60080 | 165         | 64          |          | 9.44     | Expt1 |
| SELEAIASPPAETHVFTVEDFAFQR           | 106    | 111074529                                                                                                                                                                          | N-Term(iTRAQ4plex)                                                   | 3050.49131 | 161         | 79          |          | 8.49     | Expt1 |
| VLLFSDGNSQGATAEAIK                  | 44     | 6753484                                                                                                                                                                            | N-Term(iTRAQ4plex), K19(iTRAQ4plex)                                  | 2238.17900 | 155         | 158         |          | 6.80     | Expt1 |
| SINPDEAVAYGAAVQAAILMGDK             | 20     | 124339838;124339829;124339826                                                                                                                                                      | N-Term(iTRAQ4plex), K23(iTRAQ4plex)                                  | 2592.36490 | 151         | 102         |          | 9.29     | Expt1 |
| SSGPTSLFAVTVAPPGAR                  | 43     | 160333923                                                                                                                                                                          | N-Term(iTRAQ4plex)                                                   | 1859.01946 | 150         | 124         |          | 6.03     | Expt1 |
| AEDGSVIDYELIDQDAR                   | 91     | 149260099;6996913                                                                                                                                                                  | N-Term(iTRAQ4plex)                                                   | 2052.99028 | 148         | 115         | 1.23     | 5.98     | Expt1 |
| SLFNESSTDFSGMSETK                   | 24     | 6678103                                                                                                                                                                            | N-Term(iTRAQ4plex), K17(iTRAQ4plex)                                  | 2155.01543 | 147         | 108         | 1.21     | 6.72     | Expt1 |
| GGGGLGLGSLVGGSGFAGSSQGGMFGSGGGSSSVK | 40     | 20911031                                                                                                                                                                           | N-Term(iTRAQ4plex), K40(iTRAQ4plex)                                  | 3580.72524 | 145         | 97          |          | 9.62     | Expt1 |
| VNPTVFDDITADDEPLGR                  | 43     | 149257773;6679439                                                                                                                                                                  | N-Term(iTRAQ4plex)                                                   | 2150.09184 | 144         | 134         |          |          | Expt1 |
| QAFTDVTATGSLGQGLGAACGMAYTGK         | 40     | 6678359                                                                                                                                                                            | N-Term(iTRAQ4plex), C19(Methylthio), M21(Oxidation), K26(iTRAQ4plex) | 2825.35636 | 144         | 107         |          | 8.93     | Expt1 |
| SSGSPYGGYGGGGGGYGSR                 | 24     | 82801284;94371439;149252089;149257353;82918363;82918359;82954743;149266199;82954739;149266545;82956957;51769129;149266569;82957137;94400765;149268214;149268216;37674277;157277969 | N-Term(iTRAQ4plex)                                                   | 2054.89043 | 143         | 144         |          | 6.90     | Expt1 |
| GETGPAGPAGPIGPAGAR                  | 434    | 34328108                                                                                                                                                                           | N-Term(iTRAQ4plex)                                                   | 1676.88567 | 141         | 127         | 1.55     | 7.46     | Expt1 |
| AEGSDVANAVLDGADCIMLSGETAK           | 13     | 31981562                                                                                                                                                                           | N-Term(iTRAQ4plex), C16(Methylthio), K25(iTRAQ4plex)                 | 2771.31992 | 141         | 100         | 1.37     | 9.29     | Expt1 |
| TEFLSFMNTELAFTK                     | 25     | 149263303;94404308;21886811                                                                                                                                                        | N-Term(iTRAQ4plex), K16(iTRAQ4plex)                                  | 2138.11113 | 139         | 95          |          | 7.04     | Expt1 |
| DITDTSIGAYWTSAPGMVR                 | 90     | 111074529                                                                                                                                                                          | N-Term(iTRAQ4plex)                                                   | 2185.07695 | 139         | 115         | 1.23     | 6.60     | Expt1 |
| GLGTDEDSLIEIICSR                    | 30     | 149260099;6996913                                                                                                                                                                  | N-Term(iTRAQ4plex), C14(Methylthio)                                  | 1910.93669 | 138         | 104         |          | 6.75     | Expt1 |
| SYELPDGQVITIGNER                    | 233    | 6671509;6752954;6671507;157823889;14192922;33563240;30425250                                                                                                                       | N-Term(iTRAQ4plex)                                                   | 1934.99883 | 138         | 94          | 1.17     | 5.37     | Expt1 |
| SSEVLSGDDEDIYQR                     | 28     | 61743961                                                                                                                                                                           | N-Term(iTRAQ4plex)                                                   | 1842.84905 | 138         | 96          |          | 5.46     | Expt1 |
| VNVEAPNVNMEGLGK                     | 11     | 61743961                                                                                                                                                                           | N-Term(iTRAQ4plex), K16(iTRAQ4plex)                                  | 1916.01702 | 137         | 99          |          | 5.63     | Expt1 |
| SINPDEAVAYGAAVQAAILSGDK             | 17     | 31981690                                                                                                                                                                           | N-Term(iTRAQ4plex), K23(iTRAQ4plex)                                  | 2548.35898 | 137         | 133         |          | 9.56     | Expt1 |
| ETVSEESNVLCLSK                      | 12     | 149253258;33859482                                                                                                                                                                 | N-Term(iTRAQ4plex), C11(Methylthio), K14(iTRAQ4plex)                 | 1871.94255 | 137         | 100         |          | 6.43     | Expt1 |
| GTPGESGAAGPSGPIGSR                  | 171    | 111120329                                                                                                                                                                          | N-Term(iTRAQ4plex)                                                   | 1698.85600 | 135         | 113         |          | 6.50     | Expt1 |
| GLGTDEDTLIEILTTR                    | 31     | 124517663                                                                                                                                                                          | N-Term(iTRAQ4plex)                                                   | 1891.01848 | 135         | 105         |          | 6.91     | Expt1 |
| SIPTVNEENLNYYLEVNELEK               | 152    | 160333372                                                                                                                                                                          | N-Term(iTRAQ4plex), K21(iTRAQ4plex)                                  | 2798.43857 | 135         | 109         | 1.23     | 8.81     | Expt1 |
| ASVTVLGDILGSAMQNTQDLLK              | 29     | 148277039                                                                                                                                                                          | N-Term(iTRAQ4plex), M14(Oxidation), K22(iTRAQ4plex)                  | 2578.40641 | 135         | 110         |          | 8.25     | Expt1 |
| GAGYTFGQDISETFNHANGLTLVSR           | 6      | 8394024;149258657;9506983                                                                                                                                                          | N-Term(iTRAQ4plex), N18(Deamidated)                                  | 2800.38041 | 134         | 94          |          | 7.83     | Expt1 |
| AGGGSFGGGSLYGGGSSR                  | 51     | 226823220                                                                                                                                                                          | N-Term(iTRAQ4plex)                                                   | 1644.78484 | 134         | 120         |          | 6.67     | Expt1 |
| GGETVMVSAAGAVGSVVGQIAK              | 30     | 13385466                                                                                                                                                                           | N-Term(iTRAQ4plex), K23(iTRAQ4plex)                                  | 2347.29636 | 133         | 86          |          | 6.34     | Expt1 |
| SSLSSAQADFNLALDR                    | 15     | 115496850                                                                                                                                                                          | N-Term(iTRAQ4plex)                                                   | 2096.04350 | 133         | 125         |          | 7.35     | Expt1 |
| GLGTDEDSLINLLTSR                    | 44     | 6753060                                                                                                                                                                            | N-Term(iTRAQ4plex)                                                   | 1847.98870 | 133         | 116         |          | 6.88     | Expt1 |
| NPDDITNEEYGEFYK                     | 17     | 6754254                                                                                                                                                                            | N-Term(iTRAQ4plex), K15(iTRAQ4plex)                                  | 2121.98711 | 133         | 101         |          | 5.92     | Expt1 |
| AAVPSGASTGIYEALRLR                  | 61     | 149249466;149253386;149259350;6679651;7305027                                                                                                                                      | N-Term(iTRAQ4plex)                                                   | 1949.05071 | 132         | 147         |          | 6.21     | Expt1 |
| AFLADPSAFAAAAATAAPAAAAAPAK          | 15     | 94383772;6671569                                                                                                                                                                   | N-Term(iTRAQ4plex), K31(iTRAQ4plex)                                  | 2984.61051 | 131         | 78          |          | 7.53     | Expt1 |
| GEVQTVTFDIDEVK                      | 104    | 111074529                                                                                                                                                                          | N-Term(iTRAQ4plex), K14(iTRAQ4plex)                                  | 1855.95232 | 131         | 98          |          | 6.17     | Expt1 |
| SGDAAIIVDMVPGKPMCVESFDYPLGR         | 15     | 126032329                                                                                                                                                                          | N-Term(iTRAQ4plex), K13(iTRAQ4plex), C16(Methylthio)                 | 3272.58103 | 131         | 48          |          | 6.49     | Expt1 |
| EISPDTLLDLQNDISELR                  | 149    | 20137008                                                                                                                                                                           | N-Term(iTRAQ4plex)                                                   | 2430.24761 | 130         | 110         |          | 7.30     | Expt1 |
| TLVTQNSGVEALIHAILR                  | 3      | 28395018                                                                                                                                                                           | N-Term(iTRAQ4plex)                                                   | 2079.21073 | 129         | 85          |          | 8.64     | Expt1 |
| VEVSAPDVSIIEGSEK                    | 10     | 61743961                                                                                                                                                                           | N-Term(iTRAQ4plex), K16(iTRAQ4plex)                                  | 1890.99187 | 129         | 111         |          | 5.71     | Expt1 |
| YIQVVYLHNNNISAVGQNDFCR              | 21     | 6681143                                                                                                                                                                            | N-Term(iTRAQ4plex), C21(Methylthio)                                  | 2757.34275 | 129         | 62          |          | 6.34     | Expt1 |

|                              |     |                                                                                                                |                                                      |            |     |     |      |      |       |
|------------------------------|-----|----------------------------------------------------------------------------------------------------------------|------------------------------------------------------|------------|-----|-----|------|------|-------|
| IFVGLSPDTPPEEK               | 30  | 116256518;116256514;116256516;116256512                                                                        | N-Term(iTRAQ4plex), K14(iTRAQ4plex)                  | 1776.96514 | 129 | 103 |      | 5.67 | Expt1 |
| GEPGPAGSVGPVAVGPR            | 232 | 111120329                                                                                                      | N-Term(iTRAQ4plex)                                   | 1704.91887 | 129 | 111 |      | 6.57 | Expt1 |
| ITYQPSTGEGNEQITIVGGR         | 168 | 111074529                                                                                                      | N-Term(iTRAQ4plex)                                   | 2252.12627 | 128 | 143 |      | 7.22 | Expt1 |
| EDMAALEKDYEEVGDADSAEGDDEGEEY | 3   | 6678469                                                                                                        | N-Term(iTRAQ4plex), K8(iTRAQ4plex)                   | 3254.36386 | 128 | 69  |      | 7.31 | Expt1 |
| DFSALSQLQDQTQELLQEENR        | 31  | 114326446                                                                                                      | N-Term(iTRAQ4plex)                                   | 2637.28398 | 128 | 133 | 1.18 | 8.25 | Expt1 |
| GIVDQSQQAYQEAFEISK           | 43  | 149269348;6756041                                                                                              | N-Term(iTRAQ4plex), K18(iTRAQ4plex)                  | 2329.19968 | 127 | 87  |      | 7.64 | Expt1 |
| GEVGPAGPNPFAGPAGAAGQPGAK     | 30  | 111120329                                                                                                      | N-Term(iTRAQ4plex), N9(Deamidated), K24(iTRAQ4plex)  | 2324.18662 | 127 | 115 |      | 7.87 | Expt1 |
| EVAFAQFGSDLDAAATQQLSR        | 7   | 6680748                                                                                                        | N-Term(iTRAQ4plex)                                   | 2482.27384 | 126 | 128 |      | 8.43 | Expt1 |
| TGETGASPPGFVGEK              | 6   | 111120329                                                                                                      | N-Term(iTRAQ4plex), K16(iTRAQ4plex)                  | 1778.91509 | 126 | 100 |      | 6.66 | Expt1 |
| TITLEVEPSDTIENVK             | 95  | 9845265;149250554;82894992;149254469;149254584;94385661;149259811;149262307;6755919                            | N-Term(iTRAQ4plex), K16(iTRAQ4plex)                  | 2076.13408 | 126 | 114 |      | 6.50 | Expt1 |
| GVDEATIIDLTK                 | 84  | 124517663                                                                                                      | N-Term(iTRAQ4plex), K13(iTRAQ4plex)                  | 1675.97698 | 125 | 108 |      | 5.87 | Expt1 |
| IPPVNTNLENLYLQGNR            | 135 | 10946680                                                                                                       | N-Term(iTRAQ4plex)                                   | 2099.13970 | 125 | 106 | 1.18 | 7.54 | Expt1 |
| VTEVDGVLDAHGSVLLTEGQQAVR     | 5   | 165377185                                                                                                      | N-Term(iTRAQ4plex)                                   | 2800.46134 | 125 | 64  |      | 6.71 | Expt1 |
| NFASVQGVSLSESGFSPYSAYR       | 97  | 111074529                                                                                                      | N-Term(iTRAQ4plex)                                   | 2497.21524 | 125 | 119 |      | 8.14 | Expt1 |
| QNVVPTVVAVGGVDVMDVLT         | 76  | 22203747                                                                                                       | N-Term(iTRAQ4plex), K21(iTRAQ4plex)                  | 2444.33054 | 124 | 91  |      | 6.66 | Expt1 |
| YEMTYSGGGGGGGGGGGGTSR        | 8   | 82950147;82950149                                                                                              | N-Term(iTRAQ4plex), M3(Oxidation)                    | 2038.86553 | 124 | 123 |      | 6.23 | Expt1 |
| AVTQSAEITIPVTFEAR            | 95  | 158937312                                                                                                      | N-Term(iTRAQ4plex)                                   | 1977.07988 | 124 | 120 | 1.20 | 6.73 | Expt1 |
| EGTQYDLSVTALYASGAGEALS       | 35  | 111074529                                                                                                      | N-Term(iTRAQ4plex), K24(iTRAQ4plex)                  | 2676.36875 | 124 | 120 |      | 6.18 | Expt1 |
| AITGASLADIMAK                | 9   | 18250296;94386657                                                                                              | N-Term(iTRAQ4plex), K13(iTRAQ4plex)                  | 1549.88860 | 124 | 101 |      | 5.67 | Expt1 |
| ATDLLDDSLVSLFGNR             | 26  | 6755114                                                                                                        | N-Term(iTRAQ4plex)                                   | 1993.07500 | 124 | 125 | 1.37 | 6.81 | Expt1 |
| ETSGNLEQLLAVVK               | 14  | 6753060                                                                                                        | N-Term(iTRAQ4plex), K15(iTRAQ4plex)                  | 1902.11833 | 123 | 104 |      | 6.20 | Expt1 |
| GSGGSSAMCGGAGFGR             | 42  | 54607171;113195684                                                                                             | N-Term(iTRAQ4plex), C9(Methylthio)                   | 1635.68071 | 123 | 121 |      | 6.95 | Expt1 |
| QDMPNAMPVSELTDK              | 9   | 6680722;149254976                                                                                              | N-Term(iTRAQ4plex), K15(iTRAQ4plex)                  | 1963.97392 | 123 | 93  |      | 5.45 | Expt1 |
| SVPMSTVFYPSDGVATEK           | 115 | 6678359                                                                                                        | N-Term(iTRAQ4plex), K18(iTRAQ4plex)                  | 2203.12114 | 123 | 107 |      | 6.17 | Expt1 |
| GLTSSEPTSVMEK                | 32  | 111074529                                                                                                      | N-Term(iTRAQ4plex), K13(iTRAQ4plex)                  | 1653.86101 | 123 | 90  |      | 5.50 | Expt1 |
| LLATEQEDAATAK                | 5   | 124486712                                                                                                      | N-Term(iTRAQ4plex), K13(iTRAQ4plex)                  | 1646.92046 | 121 | 101 |      | 6.08 | Expt1 |
| TGPCPQGAPEVVYQQLR            | 39  | 13385466                                                                                                       | N-Term(iTRAQ4plex), C4(Methylthio)                   | 2243.14360 | 121 | 96  |      | 7.18 | Expt1 |
| QLDSGLLLVTGVLINR             | 47  | 82880886;149261044;149270558;149270560;149274983;84662736                                                      | N-Term(iTRAQ4plex)                                   | 1952.17021 | 121 | 119 | 1.40 | 6.07 | Expt1 |
| VDATEESDLAQYQYGR             | 33  | 42415475                                                                                                       | N-Term(iTRAQ4plex)                                   | 1924.93962 | 121 | 103 |      | 6.23 | Expt1 |
| TDYNASVSPDSSGPER             | 30  | 13384620                                                                                                       | N-Term(iTRAQ4plex)                                   | 1924.89946 | 121 | 106 |      | 5.58 | Expt1 |
| VWTSQVVEEYDLDDADDINSR        | 46  | 6680710                                                                                                        | N-Term(iTRAQ4plex)                                   | 2456.13883 | 121 | 109 |      | 7.60 | Expt1 |
| LFIGGLSFETTDESLR             | 21  | 6754220;85060507                                                                                               | N-Term(iTRAQ4plex)                                   | 1929.00969 | 121 | 96  |      | 5.04 | Expt1 |
| AMGIMNSFVNDIFER              | 69  | 68131547;68226433;30061385;149264032;160420312;46049029;28316760;68226431;160420308;30089704;30061387;13386452 | N-Term(iTRAQ4plex)                                   | 1887.92143 | 121 | 102 | 1.23 | 6.70 | Expt1 |
| ALGQNPTNAEVLK                | 16  | 33620739;94363353;94383790;26986555                                                                            | N-Term(iTRAQ4plex), K13(iTRAQ4plex)                  | 1642.94036 | 121 | 94  |      | 5.49 | Expt1 |
| IYGGSVTGATCK                 | 9   | 226958349                                                                                                      | N-Term(iTRAQ4plex), C12(Methylthio), K13(iTRAQ4plex) | 1603.84343 | 121 | 90  |      | 5.08 | Expt1 |
| ALAVGATECISPK                | 51  | 31560625                                                                                                       | N-Term(iTRAQ4plex), C9(Methylthio), K13(iTRAQ4plex)  | 1593.86308 | 121 | 97  | 1.37 | 5.77 | Expt1 |
| GLSDWAEDEPVAK                | 205 | 163310769                                                                                                      | N-Term(iTRAQ4plex), K13(iTRAQ4plex)                  | 1704.87114 | 121 | 108 |      | 5.88 | Expt1 |
| NLALCPANHAPLQEAIVIPR         | 9   | 28395018                                                                                                       | N-Term(iTRAQ4plex), C5(Methylthio)                   | 2288.21738 | 121 | 56  |      | 7.31 | Expt1 |
| IAIPGLAGAGNSVLLVSNLNP        | 21  | 116517303;116517301                                                                                            | N-Term(iTRAQ4plex)                                   | 2219.39103 | 120 | 98  |      | 8.14 | Expt1 |
| LQVELDVTGLLSQSDSK            | 20  | 114326446                                                                                                      | N-Term(iTRAQ4plex), K18(iTRAQ4plex)                  | 2207.20768 | 120 | 95  |      | 5.79 | Expt1 |
| EISSNTEQLQSSK                | 38  | 118130981                                                                                                      | N-Term(iTRAQ4plex), K13(iTRAQ4plex)                  | 1738.90837 | 119 | 110 |      | 5.85 | Expt1 |
| VTIAQGGVLPNIQAVLLPK          | 289 | 30061399;94394730;30089710;30061353;28316756;29244126;30061327;30061379;30061371                               | N-Term(iTRAQ4plex), K19(iTRAQ4plex)                  | 2219.37563 | 119 | 91  |      | 7.03 | Expt1 |
| QLSFPLSSEPTQGSYK             | 53  | 148277039                                                                                                      | N-Term(iTRAQ4plex), K16(iTRAQ4plex)                  | 2057.08281 | 119 | 96  |      | 5.73 | Expt1 |
| LQWMAGTFTGEALQYTR            | 81  | 6753484                                                                                                        | N-Term(iTRAQ4plex)                                   | 2174.08501 | 119 | 111 |      | 7.06 | Expt1 |

|                            |     |                                                                             |                                                                                                                        |            |     |     |      |      |       |
|----------------------------|-----|-----------------------------------------------------------------------------|------------------------------------------------------------------------------------------------------------------------|------------|-----|-----|------|------|-------|
| DDLGGEFTEETIK              | 37  | 164565411                                                                   | N-Term(iTRAQ4plex), K13(iTRAQ4plex)                                                                                    | 1741.87370 | 119 | 97  |      | 5.49 | Expt1 |
| DINAYNGETPTEK              | 36  | 6671549                                                                     | N-Term(iTRAQ4plex), N6(Deamidated), K13(iTRAQ4plex)                                                                    | 1740.85588 | 119 | 75  |      | 5.50 | Expt1 |
| AGVATPGLTEDQLWR            | 6   | 16716499                                                                    | N-Term(iTRAQ4plex)                                                                                                     | 1757.93376 | 119 | 88  |      | 4.88 | Expt1 |
| VLLFSDGNSQGATAEAIK         | 130 | 6753484                                                                     | N-Term(iTRAQ4plex), K19(iTRAQ4plex)                                                                                    | 2238.18413 | 119 | 158 | 1.38 | 8.58 | Expt1 |
| TLVLSNLSYSATK              | 15  | 84875537                                                                    | N-Term(iTRAQ4plex), K13(iTRAQ4plex)                                                                                    | 1684.98125 | 119 | 98  |      | 5.36 | Expt1 |
| GNPTVEVDLYTAK              | 40  | 149249466;149253386;7305027                                                 | N-Term(iTRAQ4plex), K13(iTRAQ4plex)                                                                                    | 1694.92473 | 119 | 104 |      | 5.59 | Expt1 |
| GDELADSALEIFK              | 28  | 6678321                                                                     | N-Term(iTRAQ4plex), K13(iTRAQ4plex)                                                                                    | 1695.91008 | 118 | 111 |      | 5.68 | Expt1 |
| DEQGSAAEDSEDSPTEIAVR       | 7   | 34328485                                                                    | N-Term(iTRAQ4plex)                                                                                                     | 2120.96977 | 118 | 95  |      | 6.15 | Expt1 |
| QYLVTYTPAAGGETQEVTVR       | 83  | 111074529                                                                   | N-Term(iTRAQ4plex)                                                                                                     | 2327.20951 | 118 | 114 |      | 6.87 | Expt1 |
| LSLLEELTLAENQLLR           | 18  | 6679166                                                                     | N-Term(iTRAQ4plex)                                                                                                     | 1999.15959 | 118 | 80  |      | 6.42 | Expt1 |
| TAFDDAIAELDTLNEDSYK        | 14  | 31543976                                                                    | N-Term(iTRAQ4plex), K19(iTRAQ4plex)                                                                                    | 2419.17899 | 118 | 113 |      | 6.73 | Expt1 |
| TCVADESAAANCDK             | 6   | 163310765                                                                   | N-Term(iTRAQ4plex), C2(Methylthio), C11(Methylthio), K13(iTRAQ4plex)                                                   | 1706.70683 | 118 | 93  |      | 5.52 | Expt1 |
| DGFQCGPCPDGYTNGGITCSVDVECK | 36  | 6755781                                                                     | N-Term(iTRAQ4plex), C5(Methylthio), C8(Methylthio), N15(Deamidated), C19(Methylthio), C25(Methylthio), K26(iTRAQ4plex) | 3154.16452 | 118 | 107 |      | 7.13 | Expt1 |
| DVIDIDSPDEELPCASAR         | 80  | 6755781                                                                     | N-Term(iTRAQ4plex), C14(Methylthio)                                                                                    | 2113.91899 | 118 | 115 |      | 5.46 | Expt1 |
| VPAPTNLQFTEVTPESFR         | 63  | 111074529                                                                   | N-Term(iTRAQ4plex)                                                                                                     | 2177.13530 | 118 | 89  | 1.56 | 7.64 | Expt1 |
| LVSIGAEIWDGNAK             | 27  | 11230802                                                                    | N-Term(iTRAQ4plex), K15(iTRAQ4plex)                                                                                    | 1803.01579 | 117 | 120 |      | 5.99 | Expt1 |
| LPAGLPTSLLLYLDNNK          | 93  | 160333372                                                                   | N-Term(iTRAQ4plex), K18(iTRAQ4plex)                                                                                    | 2231.29228 | 117 | 97  | 1.23 | 7.19 | Expt1 |
| VWLDPNETNEIANANSR          | 34  | 149258488;226958653;226958657;149234142;149258392                           | N-Term(iTRAQ4plex)                                                                                                     | 2087.02812 | 117 | 94  |      | 6.15 | Expt1 |
| LPEADDIQYPSMLLLTADHDDR     | 3   | 6755152                                                                     | N-Term(iTRAQ4plex)                                                                                                     | 2672.30527 | 117 | 72  |      | 7.60 | Expt1 |
| FTPGTFTNQIAAFR             | 45  | 149251929;149252092;149252176;82905443;51766344;51770420;82994829;149270876 | N-Term(iTRAQ4plex)                                                                                                     | 1842.96855 | 117 | 119 |      | 6.56 | Expt1 |
| QGAIVAVTGDGVNDSPALK        | 12  | 21450277;30409956;21450321                                                  | N-Term(iTRAQ4plex), K19(iTRAQ4plex)                                                                                    | 2100.15763 | 117 | 91  |      | 6.88 | Expt1 |
| DQMQQQLSDYEQLLDVK          | 22  | 188219589                                                                   | N-Term(iTRAQ4plex), K17(iTRAQ4plex)                                                                                    | 2369.19815 | 117 | 75  |      | 6.90 | Expt1 |
| ELDALDANDELTPLR            | 14  | 150456419                                                                   | N-Term(iTRAQ4plex)                                                                                                     | 1885.96465 | 117 | 90  | 1.17 | 5.45 | Expt1 |
| GADFLVTEVENGGSLGSK         | 70  | 31981562                                                                    | N-Term(iTRAQ4plex), N11(Deamidated), K18(iTRAQ4plex)                                                                   | 2069.07035 | 117 | 104 | 1.47 | 6.38 | Expt1 |
| IFVGGNLPEATEEK             | 23  | 146260280;6754222                                                           | N-Term(iTRAQ4plex), K14(iTRAQ4plex)                                                                                    | 1791.97759 | 117 | 98  |      | 5.54 | Expt1 |
| YLYSGQTLDTLGGK             | 45  | 6678321                                                                     | N-Term(iTRAQ4plex), K14(iTRAQ4plex)                                                                                    | 1803.97917 | 116 | 125 | 1.23 | 5.60 | Expt1 |
| DLYANTVLSGGTTMPGIADR       | 112 | 6671509;6752954                                                             | N-Term(iTRAQ4plex), M14(Oxidation)                                                                                     | 2375.17197 | 116 | 115 | 1.58 | 8.19 | Expt1 |
| AAFWEWEEGAGSSPSPLQPVR      | 20  | 117606335                                                                   | N-Term(iTRAQ4plex)                                                                                                     | 2430.18583 | 116 | 98  |      | 8.21 | Expt1 |
| QAYEIQDPEDWDVHDDFYCPR      | 27  | 6680554                                                                     | N-Term(iTRAQ4plex), C19(Methylthio)                                                                                    | 2831.19028 | 116 | 92  |      | 7.86 | Expt1 |
| VFGETTNSLSVAWDHADGPVQQYR   | 15  | 111074529                                                                   | N-Term(iTRAQ4plex)                                                                                                     | 2821.36924 | 116 | 79  |      | 7.86 | Expt1 |
| VDIDVPDVIIEGPDAR           | 71  | 61743961                                                                    | N-Term(iTRAQ4plex), K16(iTRAQ4plex)                                                                                    | 1984.05229 | 116 | 125 |      | 5.83 | Expt1 |
| GPMVSAQESQAQAILQQAR        | 51  | 164565411                                                                   | N-Term(iTRAQ4plex)                                                                                                     | 2157.12456 | 116 | 121 |      | 8.41 | Expt1 |
| SFSAASAITPSVSR             | 346 | 20911031                                                                    | N-Term(iTRAQ4plex)                                                                                                     | 1524.81694 | 116 | 103 |      | 5.88 | Expt1 |
| LSQTFPNADFAEITK            | 119 | 163310765                                                                   | N-Term(iTRAQ4plex), K15(iTRAQ4plex)                                                                                    | 1970.04912 | 115 | 92  |      | 6.83 | Expt1 |
| QNVVPTVAVGGDVMMDVLTK       | 33  | 22203747                                                                    | N-Term(iTRAQ4plex), M16(Oxidation), K21(iTRAQ4plex)                                                                    | 2460.32938 | 115 | 80  |      | 7.03 | Expt1 |
| DGHLLFGQVPLVEIDGMMLTQTR    | 3   | 160298217                                                                   | N-Term(iTRAQ4plex)                                                                                                     | 2714.42264 | 115 | 83  |      | 7.93 | Expt1 |
| AVLDAVETGTEAAATGVIGGIR     | 77  | 148747546                                                                   | N-Term(iTRAQ4plex)                                                                                                     | 2286.24932 | 115 | 122 |      | 7.99 | Expt1 |
| MVQNLEIELQSLQAMK           | 40  | 118130981                                                                   | N-Term(iTRAQ4plex), K16(iTRAQ4plex)                                                                                    | 2163.18340 | 115 | 100 |      | 6.56 | Expt1 |
| CQDLSVNGDLADTDAR           | 60  | 124517663                                                                   | N-Term(iTRAQ4plex), C1(Methylthio)                                                                                     | 1953.87456 | 115 | 118 | 1.18 | 5.57 | Expt1 |
| GLVYETSVLDPDEGIR           | 36  | 13385942;269973935                                                          | N-Term(iTRAQ4plex)                                                                                                     | 1906.98894 | 115 | 99  |      | 5.13 | Expt1 |
| DGEAGAQQAGPAGPAGER         | 144 | 34328108                                                                    | N-Term(iTRAQ4plex)                                                                                                     | 1808.86382 | 114 | 131 |      | 6.87 | Expt1 |
| VAEPEESEAEPEAAEGR          | 8   | 58037101                                                                    | N-Term(iTRAQ4plex)                                                                                                     | 1943.89421 | 114 | 89  |      | 5.09 | Expt1 |
| GVGIISEGNETVEDIAR          | 45  | 21450277;30409956;21450321                                                  | N-Term(iTRAQ4plex)                                                                                                     | 1974.02947 | 114 | 137 |      | 6.62 | Expt1 |
| LVQDVANNTEEGDGTATVLR       | 6   | 149270048;183396771                                                         | N-Term(iTRAQ4plex)                                                                                                     | 2704.35715 | 114 | 123 |      | 8.13 | Expt1 |
| NFAEITGLSPGVTYLTK          | 8   | 46849812                                                                    | N-Term(iTRAQ4plex), K18(iTRAQ4plex)                                                                                    | 2246.23404 | 114 | 64  |      | 5.78 | Expt1 |
| GGNTMTGDAIDYLVK            | 83  | 111074529                                                                   | N-Term(iTRAQ4plex), K15(iTRAQ4plex)                                                                                    | 1842.95842 | 114 | 118 | 1.23 | 6.41 | Expt1 |
| GVVPLAGTNGETTQGLDGLSER     | 38  | 6671539                                                                     | N-Term(iTRAQ4plex), N9(Deamidated)                                                                                     | 2417.23496 | 114 | 116 | 1.21 | 8.31 | Expt1 |
| FTASAGIQVGGDLTVTNP         | 17  | 149253386                                                                   | N-Term(iTRAQ4plex), K20(iTRAQ4plex)                                                                                    | 2321.26554 | 114 | 78  |      | 6.78 | Expt1 |

|                               |     |                                                                     |                                                                       |            |     |     |      |      |       |
|-------------------------------|-----|---------------------------------------------------------------------|-----------------------------------------------------------------------|------------|-----|-----|------|------|-------|
| SLLELQSSNPLGDGEGVQELCK        | 6   | 31981748;285402638;285402659                                        | N-Term(iTRAQ4plex), C21(Methylthio), K22(iTRAQ4plex)                  | 2724.35831 | 113 | 82  |      | 6.58 | Expt1 |
| LIPDTPYSVNIVALYSDGEGNPPSPSQGR | 16  | 111074529                                                           | N-Term(iTRAQ4plex)                                                    | 3090.55918 | 113 | 97  |      | 8.25 | Expt1 |
| PGDLEAPTNLVISER               | 105 | 111074529                                                           | N-Term(iTRAQ4plex)                                                    | 1811.96782 | 113 | 109 |      | 5.70 | Expt1 |
| SLDLDSIIAEVK                  | 449 | 29789317;20911031;54607171;113195684                                | N-Term(iTRAQ4plex), K12(iTRAQ4plex)                                   | 1590.92278 | 113 | 89  | 1.21 | 5.80 | Expt1 |
| NIGVEVFSGLIK                  | 52  | 111074529                                                           | N-Term(iTRAQ4plex), K12(iTRAQ4plex)                                   | 1563.94219 | 113 | 92  |      | 5.38 | Expt1 |
| IFNNGADLSGITEENAPLK           | 25  | 6678085;6678083;76881807;6678079                                    | N-Term(iTRAQ4plex), N4(Deamidated), K19(iTRAQ4plex)                   | 2292.20615 | 113 | 79  |      | 5.73 | Expt1 |
| QDLPNAMNAEITDK                | 15  | 6680718;6680716;6671571                                             | N-Term(iTRAQ4plex), K15(iTRAQ4plex)                                   | 1918.97832 | 113 | 120 |      | 6.23 | Expt1 |
| GVSSGPGMGLMGPR                | 59  | 111120329                                                           | N-Term(iTRAQ4plex)                                                    | 1543.78606 | 113 | 101 |      | 5.85 | Expt1 |
| FLENQEQEYVQAVK                | 59  | 124517663                                                           | N-Term(iTRAQ4plex), K14(iTRAQ4plex)                                   | 2013.05632 | 113 | 99  |      | 7.04 | Expt1 |
| QNLDPLFEQYINLNR               | 425 | 20911031                                                            | N-Term(iTRAQ4plex), N12(Deamidated)                                   | 2022.04387 | 113 | 123 | 1.63 | 6.13 | Expt1 |
| EPCGGLEDVNEAK                 | 24  | 6753484                                                             | N-Term(iTRAQ4plex), C3(Methylthio), K14(iTRAQ4plex)                   | 1765.83611 | 113 | 114 |      | 5.86 | Expt1 |
| LAPITSDPTEAAAVGAVEASFK        | 59  | 31981562                                                            | N-Term(iTRAQ4plex), K22(iTRAQ4plex)                                   | 2433.31743 | 112 | 121 |      | 7.55 | Expt1 |
| SINPDEAVAYGAAVQAAILMGDK       | 26  | 124339838;124339829;124339826                                       | N-Term(iTRAQ4plex), M20(Oxidation), K23(iTRAQ4plex)                   | 2608.35953 | 112 | 80  |      | 8.20 | Expt1 |
| VAVVQYSGQQQQPGR               | 188 | 6753484                                                             | N-Term(iTRAQ4plex)                                                    | 1845.96842 | 112 | 97  | 1.22 | 6.82 | Expt1 |
| ISIGGGSCGIGGGYGSR             | 62  | 54607171;113195684                                                  | N-Term(iTRAQ4plex), C8(Methylthio)                                    | 1687.80461 | 112 | 119 |      | 6.11 | Expt1 |
| FAIQDISVEETSAK                | 17  | 61097906;11230802;7304855;157951643                                 | N-Term(iTRAQ4plex), K14(iTRAQ4plex)                                   | 1825.98625 | 112 | 103 |      | 5.55 | Expt1 |
| FITPESTVMLLEAQAATGGIIPHR      | 11  | 82950147;82950149;149264086                                         | N-Term(iTRAQ4plex), M9(Oxidation)                                     | 2827.47818 | 112 | 91  |      | 7.20 | Expt1 |
| MQQNIQELEEQLLEESAR            | 16  | 114326446                                                           | N-Term(iTRAQ4plex)                                                    | 2477.16446 | 112 | 103 | 1.27 | 7.10 | Expt1 |
| VTLPTVPGDYAK                  | 107 | 148277039                                                           | N-Term(iTRAQ4plex), K13(iTRAQ4plex)                                   | 1649.93901 | 112 | 86  |      | 4.58 | Expt1 |
| NADMSEEMQQDSVECATQALEK        | 9   | 213688406                                                           | N-Term(iTRAQ4plex), C15(Methylthio), K22(iTRAQ4plex)                  | 2791.22367 | 112 | 108 |      | 8.01 | Expt1 |
| NADMSEEMQQNSVECATQALEK        | 10  | 82998589                                                            | N-Term(iTRAQ4plex), N11(Deamidated), C15(Methylthio), K22(iTRAQ4plex) | 2791.22367 | 112 | 108 |      | 8.01 | Expt1 |
| IVLESQDQTAQESTVGGGVNR         | 24  | 226423922                                                           | N-Term(iTRAQ4plex)                                                    | 2445.27610 | 112 | 110 | 1.47 | 7.61 | Expt1 |
| AIVAIENPADVSVISSR             | 63  | 149251929;63514363;51766344;149264394;51770420;829994829;149270876  | N-Term(iTRAQ4plex)                                                    | 1885.05315 | 112 | 112 |      | 5.62 | Expt1 |
| QTQTFTTYSDNQPGVLQIYYEGER      | 18  | 124339829;124339826;31981690                                        | N-Term(iTRAQ4plex)                                                    | 2918.43015 | 111 | 90  |      | 6.64 | Expt1 |
| NPDDITQEEYGEFYK               | 32  | 40556608                                                            | N-Term(iTRAQ4plex), K15(iTRAQ4plex)                                   | 2136.00102 | 111 | 85  |      | 5.59 | Expt1 |
| ASVTVLGDILGSAMQNTQDLLK        | 16  | 148277039                                                           | N-Term(iTRAQ4plex), N16(Deamidated), K22(iTRAQ4plex)                  | 2563.39560 | 111 | 81  | 1.94 | 7.94 | Expt1 |
| LAPDYDALDVANK                 | 24  | 149265809;149233872;149260643;94388464;94388502;149265307;149266479 | N-Term(iTRAQ4plex), K13(iTRAQ4plex)                                   | 1692.90923 | 111 | 113 |      | 5.21 | Expt1 |
| SEPIPESNEGPVK                 | 3   | 112293264                                                           | N-Term(iTRAQ4plex), K13(iTRAQ4plex)                                   | 1670.88835 | 111 | 89  |      | 4.19 | Expt1 |
| SVEEVASEIQPFRL                | 71  | 82950147;82950149;149264086                                         | N-Term(iTRAQ4plex)                                                    | 1747.93962 | 111 | 85  | 1.81 | 6.37 | Expt1 |
| IINEPTAAAIAYGLDR              | 82  | 124339829;124339826                                                 | N-Term(iTRAQ4plex)                                                    | 1832.00737 | 111 | 92  |      | 6.58 | Expt1 |
| YSPNTQVEILPQGR                | 52  | 110227377                                                           | N-Term(iTRAQ4plex)                                                    | 1745.93572 | 111 | 100 | 1.29 | 5.18 | Expt1 |
| QCANLQNAIAEAEQR               | 172 | 20911031                                                            | N-Term(iTRAQ4plex), C2(Methylthio)                                    | 1848.88127 | 111 | 97  |      | 6.61 | Expt1 |
| VDALMDEINFMK                  | 271 | 20911031                                                            | N-Term(iTRAQ4plex), K12(iTRAQ4plex)                                   | 1713.88762 | 111 | 103 | 1.23 | 5.90 | Expt1 |
| LNFLSPELPAVAEFSTNETMGHSADR    | 3   | 149249598;82886628;21704100                                         | N-Term(iTRAQ4plex)                                                    | 2977.45731 | 111 | 80  |      | 7.63 | Expt1 |
| TAFDEIAELDTLSEESYK            | 30  | 6756041                                                             | N-Term(iTRAQ4plex), K19(iTRAQ4plex)                                   | 2420.20098 | 111 | 121 |      | 7.99 | Expt1 |
| LDIETSDVSLLEGPEGK             | 18  | 61743961                                                            | N-Term(iTRAQ4plex), K16(iTRAQ4plex)                                   | 1977.02959 | 111 | 122 |      | 5.84 | Expt1 |
| GPPGPMGPPGLAGPPGESGR          | 327 | 34328108                                                            | N-Term(iTRAQ4plex), M6(Oxidation)                                     | 1944.96758 | 111 | 122 |      | 7.44 | Expt1 |
| EGNPEEDITADQTNAAALYK          | 18  | 110227377                                                           | N-Term(iTRAQ4plex), K22(iTRAQ4plex)                                   | 2637.29111 | 111 | 89  |      | 6.86 | Expt1 |
| LGVYDADGDGDFDVEDDAK           | 20  | 125628659;125628654                                                 | N-Term(iTRAQ4plex), K18(iTRAQ4plex)                                   | 2175.00144 | 111 | 94  | 1.22 | 5.62 | Expt1 |
| ALNAQQDLENPLELR               | 25  | 169234958;32129201;32129205                                         | N-Term(iTRAQ4plex)                                                    | 1925.02104 | 111 | 91  |      | 6.68 | Expt1 |
| QTIENSQGAYQEAFDISK            | 6   | 149263879;149275178;6756039                                         | N-Term(iTRAQ4plex), K18(iTRAQ4plex)                                   | 2317.15532 | 111 | 113 |      | 6.30 | Expt1 |

|                               |     |                                                                                                                                                                                                       |                                                     |            |     |     |      |      |       |
|-------------------------------|-----|-------------------------------------------------------------------------------------------------------------------------------------------------------------------------------------------------------|-----------------------------------------------------|------------|-----|-----|------|------|-------|
| VPTPNVSVVLTGR                 | 65  | 149248895;149249272;149251040;149251044;149251911;149251964;149251966;149252413;149258770;149258772;149259607;149263021;149265154;149266302;149266427;149266431;149268472;149273204;149275059;6679939 | N-Term(iTRAQ4plex), C13(Methylthio)                 | 1689.88140 | 110 | 94  |      | 5.13 | Expt1 |
| EVFTEQADLSGITEAK              | 31  | 148747546                                                                                                                                                                                             | N-Term(iTRAQ4plex), K16(iTRAQ4plex)                 | 2026.06389 | 110 | 135 | 1.64 | 5.80 | Expt1 |
| DFLAGGIAAAVSK                 | 24  | 148747424                                                                                                                                                                                             | N-Term(iTRAQ4plex), K13(iTRAQ4plex)                 | 1507.87969 | 110 | 98  |      | 5.10 | Expt1 |
| EQLTFLAPLNSVFK                | 138 | 6678321                                                                                                                                                                                               | N-Term(iTRAQ4plex), K14(iTRAQ4plex)                 | 1895.08855 | 110 | 92  |      | 5.82 | Expt1 |
| LSWDPSPSAVTGYK                | 52  | 111074529                                                                                                                                                                                             | N-Term(iTRAQ4plex), K14(iTRAQ4plex)                 | 1795.95537 | 110 | 98  |      | 5.75 | Expt1 |
| IITITGTQDQIQNAQYLLQNSVK       | 12  | 13384620                                                                                                                                                                                              | N-Term(iTRAQ4plex), K23(iTRAQ4plex)                 | 2877.59470 | 110 | 99  |      | 8.58 | Expt1 |
| NPELQNLLLDDFFK                | 16  | 124486895                                                                                                                                                                                             | N-Term(iTRAQ4plex), K14(iTRAQ4plex)                 | 1994.08672 | 110 | 92  |      | 5.30 | Expt1 |
| VGVLQLEASPDFLATPEEK           | 80  | 148277039                                                                                                                                                                                             | N-Term(iTRAQ4plex), K18(iTRAQ4plex)                 | 2218.18779 | 110 | 103 |      | 6.53 | Expt1 |
| SVGGSGGGSFGDNLVTR             | 11  | 162287370                                                                                                                                                                                             | N-Term(iTRAQ4plex)                                  | 1710.85381 | 109 | 130 |      | 5.91 | Expt1 |
| LLDFGSLSNLQVQTPTVGMNFK        | 6   | 149261626;149261791;6677801                                                                                                                                                                           | N-Term(iTRAQ4plex), K22(iTRAQ4plex)                 | 2697.45903 | 109 | 127 |      | 7.60 | Expt1 |
| LYGPSSVSFADDFVR               | 32  | 161353502                                                                                                                                                                                             | N-Term(iTRAQ4plex)                                  | 1803.90813 | 109 | 98  |      | 4.42 | Expt1 |
| MLLEYTDSYDEK                  | 5   | 6754084                                                                                                                                                                                               | N-Term(iTRAQ4plex), K13(iTRAQ4plex)                 | 1881.91094 | 109 | 97  | 1.23 | 5.31 | Expt1 |
| INPDGSQSVVEVPYAR              | 11  | 9903607                                                                                                                                                                                               | N-Term(iTRAQ4plex)                                  | 1874.97405 | 109 | 93  |      | 5.42 | Expt1 |
| NMAEQIQEIQSVQVQSK             | 73  | 6678359                                                                                                                                                                                               | N-Term(iTRAQ4plex), M2(Oxidation), K17(iTRAQ4plex)  | 2313.21238 | 109 | 96  |      | 7.27 | Expt1 |
| IQEETGVEETGK                  | 3   | 148277039                                                                                                                                                                                             | N-Term(iTRAQ4plex), K13(iTRAQ4plex)                 | 1664.85845 | 109 | 88  |      | 5.67 | Expt1 |
| GPMVSAQESQAQAILQQAR           | 35  | 164565411                                                                                                                                                                                             | N-Term(iTRAQ4plex), M3(Oxidation)                   | 2173.10991 | 109 | 125 |      | 7.84 | Expt1 |
| SVEVSDPVPAGDLVK               | 32  | 6678329                                                                                                                                                                                               | N-Term(iTRAQ4plex), K15(iTRAQ4plex)                 | 1800.00224 | 109 | 97  |      | 5.15 | Expt1 |
| GIGTNEQAIDVLTGK               | 39  | 149265291;22165408                                                                                                                                                                                    | N-Term(iTRAQ4plex), K15(iTRAQ4plex)                 | 1860.07340 | 109 | 98  |      | 6.07 | Expt1 |
| ASGPPVSELTGK                  | 13  | 9845257;254588110                                                                                                                                                                                     | N-Term(iTRAQ4plex), K12(iTRAQ4plex)                 | 1486.87395 | 109 | 71  |      | 5.11 | Expt1 |
| AAVENLPTFLVELSR               | 20  | 88014720                                                                                                                                                                                              | N-Term(iTRAQ4plex)                                  | 1803.01653 | 109 | 95  |      | 5.78 | Expt1 |
| NSDVEIFAVGVK                  | 62  | 111074529                                                                                                                                                                                             | N-Term(iTRAQ4plex), K12(iTRAQ4plex)                 | 1565.87895 | 108 | 95  |      | 5.59 | Expt1 |
| DLYANTVLSGGTTPYGIADR          | 143 | 6671509;6752954                                                                                                                                                                                       | N-Term(iTRAQ4plex)                                  | 2359.17363 | 108 | 121 | 1.38 | 8.92 | Expt1 |
| DAEEVISQITIDTIVDMIK           | 21  | 6753484                                                                                                                                                                                               | N-Term(iTRAQ4plex), M16(Oxidation), K18(iTRAQ4plex) | 2324.22214 | 108 | 87  |      | 7.50 | Expt1 |
| YAEYSYFALGNELNSYR             | 44  | 88196773                                                                                                                                                                                              | N-Term(iTRAQ4plex)                                  | 2204.05058 | 108 | 94  | 1.68 | 6.48 | Expt1 |
| VEQIAAIAQELNELDYDSDHNVNTR     | 11  | 11230802                                                                                                                                                                                              | N-Term(iTRAQ4plex)                                  | 3049.50638 | 108 | 79  |      | 7.43 | Expt1 |
| GELGPVGNPAGPAGPR              | 59  | 111120329                                                                                                                                                                                             | N-Term(iTRAQ4plex)                                  | 1743.92693 | 108 | 119 |      | 5.61 | Expt1 |
| LFTALAGWGSEVFTTGR             | 4   | 121949813                                                                                                                                                                                             | N-Term(iTRAQ4plex)                                  | 1957.03362 | 108 | 91  |      | 5.51 | Expt1 |
| AYEEDYGSTLEEDIQGDTSGLYER      | 13  | 149265291;22165408                                                                                                                                                                                    | N-Term(iTRAQ4plex)                                  | 2884.28130 | 108 | 108 |      | 7.82 | Expt1 |
| VPGVDVSSSLGAGSVEVQAPSLQSGDIGK | 8   | 61743961                                                                                                                                                                                              | N-Term(iTRAQ4plex), K29(iTRAQ4plex)                 | 3028.60746 | 108 | 99  |      | 8.39 | Expt1 |
| GEPGSPGENGAPQMGPR             | 57  | 34328108                                                                                                                                                                                              | N-Term(iTRAQ4plex), M15(Oxidation)                  | 1854.85625 | 108 | 81  |      | 5.21 | Expt1 |
| IEDLSQQAQAAAEK                | 12  | 41350312;163965357                                                                                                                                                                                    | N-Term(iTRAQ4plex), K15(iTRAQ4plex)                 | 1903.03362 | 107 | 108 |      | 6.61 | Expt1 |
| DAEDAMDAMDGAVLDR              | 25  | 6755478                                                                                                                                                                                               | N-Term(iTRAQ4plex)                                  | 1895.82524 | 107 | 111 | 1.71 | 5.66 | Expt1 |
| VLDNYLTSPLPEEVDTSAEDEGISQR    | 15  | 15617203                                                                                                                                                                                              | N-Term(iTRAQ4plex)                                  | 3150.51706 | 107 | 81  |      | 5.76 | Expt1 |
| ILATPPQEDAPSVDIANIR           | 232 | 6678359                                                                                                                                                                                               | N-Term(iTRAQ4plex)                                  | 2164.17558 | 107 | 121 |      | 6.81 | Expt1 |
| TFVSIPTAEVGVLVGK              | 69  | 6755040                                                                                                                                                                                               | N-Term(iTRAQ4plex), K16(iTRAQ4plex)                 | 1905.13291 | 107 | 97  |      | 6.22 | Expt1 |
| ASYSAVSLYGNPVR                | 131 | 6681143                                                                                                                                                                                               | N-Term(iTRAQ4plex)                                  | 1627.85723 | 107 | 87  |      | 5.79 | Expt1 |
| AGTGVNDVLEAATR                | 11  | 52353955                                                                                                                                                                                              | N-Term(iTRAQ4plex)                                  | 1632.83257 | 107 | 96  |      | 5.18 | Expt1 |
| YEMGNPNENLLVDSR               | 17  | 169234958;32129201                                                                                                                                                                                    | N-Term(iTRAQ4plex)                                  | 1993.97966 | 107 | 118 |      | 5.52 | Expt1 |
| EQADFAIEALAK                  | 66  | 29336026;114326446;241982716;241982718                                                                                                                                                                | N-Term(iTRAQ4plex), K12(iTRAQ4plex)                 | 1593.88017 | 107 | 96  |      | 5.15 | Expt1 |
| VGINDFCPMGFGVK                | 70  | 20137008                                                                                                                                                                                              | N-Term(iTRAQ4plex), C7(Methylthio), K14(iTRAQ4plex) | 1817.90898 | 107 | 95  |      | 6.15 | Expt1 |
| TVGLLPPQNIHIFDEWYTR           | 13  | 111074529                                                                                                                                                                                             | N-Term(iTRAQ4plex)                                  | 2443.29947 | 107 | 46  |      | 5.00 | Expt1 |
| TVTNAVVTVPAYFNDSSQR           | 63  | 31981690                                                                                                                                                                                              | N-Term(iTRAQ4plex)                                  | 2126.10430 | 107 | 95  | 1.22 | 5.82 | Expt1 |
| YIAIVSTTVETK                  | 8   | 116089273                                                                                                                                                                                             | N-Term(iTRAQ4plex), K12(iTRAQ4plex)                 | 1612.94524 | 107 | 90  |      | 4.07 | Expt1 |
| GAEAAVNTGPDGVPVEGSR           | 8   | 20806532;47059495                                                                                                                                                                                     | N-Term(iTRAQ4plex)                                  | 1926.96160 | 107 | 89  |      | 5.49 | Expt1 |
| GSYDGLGGPIITQVITPK            | 9   | 13384620                                                                                                                                                                                              | N-Term(iTRAQ4plex), K19(iTRAQ4plex)                 | 2205.24224 | 107 | 127 |      | 5.83 | Expt1 |
| SLEYLDLSFNQMSK                | 106 | 160333372                                                                                                                                                                                             | N-Term(iTRAQ4plex), K14(iTRAQ4plex)                 | 1963.01189 | 106 | 100 |      | 5.88 | Expt1 |
| TVTAMDVVYALK                  | 99  | 149263932;94378251                                                                                                                                                                                    | N-Term(iTRAQ4plex), K12(iTRAQ4plex)                 | 1598.91118 | 106 | 96  | 1.36 | 5.94 | Expt1 |
| TVTAMDVVYALK                  | 68  | 149263932;94378251                                                                                                                                                                                    | N-Term(iTRAQ4plex), M5(Oxidation), K12(iTRAQ4plex)  | 1614.90471 | 106 | 95  |      | 5.07 | Expt1 |

|                                  |     |                                                |                                                                       |            |     |     |      |      |       |
|----------------------------------|-----|------------------------------------------------|-----------------------------------------------------------------------|------------|-----|-----|------|------|-------|
| GGETVMVSAAGAVGSVVGQIAK           | 16  | 13385466                                       | N-Term(iTRAQ4plex), M6(Oxidation), K23(iTRAQ4plex)                    | 2363.29319 | 106 | 82  |      | 6.28 | Expt1 |
| TFVQENVYDEFVER                   | 21  | 6753036                                        | N-Term(iTRAQ4plex)                                                    | 1918.93413 | 106 | 74  |      | 5.57 | Expt1 |
| NEEDATELVGLAQAVNAR               | 29  | 6678483                                        | N-Term(iTRAQ4plex)                                                    | 2044.04253 | 106 | 136 |      | 6.15 | Expt1 |
| TELEDLTDSTAAQQLR                 | 29  | 114326446                                      | N-Term(iTRAQ4plex)                                                    | 2064.02788 | 106 | 108 |      | 5.91 | Expt1 |
| GPPGPMGPPGLAGPPGESGR             | 77  | 34328108                                       | N-Term(iTRAQ4plex)                                                    | 1928.97283 | 106 | 124 |      | 6.38 | Expt1 |
| GDEGEVGDPEDNNDISPR               | 55  | 6753484                                        | N-Term(iTRAQ4plex)                                                    | 2115.91660 | 106 | 96  |      | 5.82 | Expt1 |
| LAMQEFMLPVGASSFR                 | 14  | 149249466;149253386                            | N-Term(iTRAQ4plex)                                                    | 2041.07805 | 106 | 96  | 1.58 | 6.21 | Expt1 |
| VGLTNYAAAYCTGLLLAR               | 9   | 94362762;149233658;149257749                   | N-Term(iTRAQ4plex), C11(Methylthio)                                   | 2060.08097 | 106 | 94  |      | 5.79 | Expt1 |
| VQYTLTGLGQPLPSER                 | 20  | 115647999                                      | N-Term(iTRAQ4plex)                                                    | 2000.09734 | 106 | 69  |      | 4.74 | Expt1 |
| EESPLLIGQATVSDIPR                | 26  | 46849812                                       | N-Term(iTRAQ4plex)                                                    | 2081.09941 | 106 | 104 |      | 6.19 | Expt1 |
| MVQNLEIELQSLAMK                  | 71  | 118130981                                      | N-Term(iTRAQ4plex), M1(Oxidation), K16(iTRAQ4plex)                    | 2195.17710 | 106 | 84  |      | 7.96 | Expt1 |
| GPDGLTALAEATDNQAIK               | 24  | 6679961                                        | N-Term(iTRAQ4plex), K17(iTRAQ4plex)                                   | 2002.07041 | 106 | 101 | 1.63 | 6.21 | Expt1 |
| LVLYTILPNGEVVGDTVK               | 189 | 148277039                                      | N-Term(iTRAQ4plex), K18(iTRAQ4plex)                                   | 2218.30423 | 106 | 104 |      | 5.74 | Expt1 |
| TTAENEFVMLK                      | 263 | 20911031                                       | N-Term(iTRAQ4plex), N5(Deamidated), K11(iTRAQ4plex)                   | 1571.82671 | 106 | 88  | 1.22 | 5.63 | Expt1 |
| LIILANGGPGQLVQIMR                | 44  | 28395018                                       | N-Term(iTRAQ4plex), N6(Deamidated)                                    | 1938.13767 | 106 | 108 |      | 6.20 | Expt1 |
| VSNAQLLLQIDNAR                   | 240 | 149262636;118130981                            | N-Term(iTRAQ4plex), N3(Deamidated)                                    | 1699.94914 | 105 | 99  |      | 6.13 | Expt1 |
| ILGADTSDVLEETGR                  | 44  | 6680748                                        | N-Term(iTRAQ4plex)                                                    | 1719.89153 | 105 | 112 |      | 5.53 | Expt1 |
| GVNQEEEDTNGCLK                   | 24  | 148277039                                      | N-Term(iTRAQ4plex), N10(Deamidated), C12(Methylthio), K14(iTRAQ4plex) | 1869.85674 | 105 | 81  |      | 5.96 | Expt1 |
| SSITPGTVLIILTGR                  | 34  | 82880886;149274983;84662736                    | N-Term(iTRAQ4plex)                                                    | 1672.01474 | 105 | 102 | 1.26 | 6.04 | Expt1 |
| STGEAFVQFASQIEIAEK               | 21  | 9845253;10946928                               | N-Term(iTRAQ4plex), K17(iTRAQ4plex)                                   | 2130.10709 | 105 | 66  |      | 6.83 | Expt1 |
| LSGSPNYTTPQIINSK                 | 20  | 11230802                                       | N-Term(iTRAQ4plex), K18(iTRAQ4plex)                                   | 2208.22124 | 105 | 90  |      | 5.96 | Expt1 |
| GEAGAAGPSGAPGR                   | 153 | 111120329                                      | N-Term(iTRAQ4plex)                                                    | 1395.71282 | 104 | 111 |      | 6.61 | Expt1 |
| ATGPPVSELITK                     | 15  | 21426893                                       | N-Term(iTRAQ4plex), K12(iTRAQ4plex)                                   | 1500.89165 | 104 | 82  |      | 4.63 | Expt1 |
| NSGIENGAFAQGLK                   | 82  | 6681143                                        | N-Term(iTRAQ4plex), N1(Deamidated), N6(Deamidated), K13(iTRAQ4plex)   | 1624.84538 | 104 | 81  |      | 5.80 | Expt1 |
| EFADSLGIPFLETSK                  | 30  | 6679587                                        | N-Term(iTRAQ4plex), K16(iTRAQ4plex)                                   | 2013.08415 | 104 | 95  |      | 4.89 | Expt1 |
| VYADSQYQAVK                      | 6   | 112421039                                      | N-Term(iTRAQ4plex), K13(iTRAQ4plex)                                   | 1815.95012 | 104 | 112 |      | 6.65 | Expt1 |
| AVAGDASESALLK                    | 5   | 21450277                                       | N-Term(iTRAQ4plex), K13(iTRAQ4plex)                                   | 1519.86113 | 104 | 98  |      | 5.95 | Expt1 |
| LASVPAGGAVAVSAAPGSAAPAAGSAPAAAEK | 13  | 149263166;83745120                             | N-Term(iTRAQ4plex), K33(iTRAQ4plex)                                   | 3062.64126 | 104 | 68  |      | 7.22 | Expt1 |
| CFIVGADNVGSK                     | 7   | 94369748;94383772;6671569                      | N-Term(iTRAQ4plex), C1(Methylthio), K12(iTRAQ4plex)                   | 1543.78337 | 104 | 85  |      | 4.69 | Expt1 |
| LGELVLGPDYDNTVLEELR              | 24  | 111074529                                      | N-Term(iTRAQ4plex)                                                    | 2273.25730 | 104 | 95  |      | 6.82 | Expt1 |
| GSAPPGVPPEGQIR                   | 128 | 6754090                                        | N-Term(iTRAQ4plex)                                                    | 1505.82244 | 104 | 78  |      | 4.52 | Expt1 |
| AIAELGIYPAVDPLDSTSR              | 50  | 31980648                                       | N-Term(iTRAQ4plex)                                                    | 2132.13750 | 104 | 89  | 1.23 | 5.20 | Expt1 |
| NMAEQIQEIYSQVQSK                 | 45  | 6678359                                        | N-Term(iTRAQ4plex), K17(iTRAQ4plex)                                   | 2297.21573 | 104 | 79  |      | 7.66 | Expt1 |
| WNNTDLTGLTEITVEDQLAR             | 6   | 6755963                                        | N-Term(iTRAQ4plex)                                                    | 2320.15849 | 104 | 126 |      | 5.77 | Expt1 |
| FSPDGELYASGSEDGTLR               | 3   | 160707896                                      | N-Term(iTRAQ4plex)                                                    | 2044.96025 | 104 | 76  |      | 4.79 | Expt1 |
| GFEVVYMTPEIDYCVQQLK              | 7   | 40556608                                       | N-Term(iTRAQ4plex), C15(Methylthio), K20(iTRAQ4plex)                  | 2725.32474 | 103 | 74  |      | 6.42 | Expt1 |
| CIDPISCEEPYLLIGENR               | 27  | 6753824                                        | N-Term(iTRAQ4plex), C1(Methylthio), C7(Methylthio)                    | 2300.06046 | 103 | 94  |      | 5.90 | Expt1 |
| TPSQEQLLAEALAAAR                 | 60  | 160707889                                      | N-Term(iTRAQ4plex)                                                    | 1812.99773 | 103 | 106 | 1.29 | 7.04 | Expt1 |
| LLPETSPDFAIWQITDR                | 56  | 111074529                                      | N-Term(iTRAQ4plex)                                                    | 2243.18559 | 103 | 87  |      | 6.24 | Expt1 |
| ALAAAGYDVEK                      | 18  | 13430890;9845257;112807207;254588110           | N-Term(iTRAQ4plex), K11(iTRAQ4plex)                                   | 1395.77617 | 103 | 87  |      | 4.63 | Expt1 |
| YFPTQALNFAFK                     | 52  | 63475897;82880803;22094075;148747424;254692892 | N-Term(iTRAQ4plex), K12(iTRAQ4plex)                                   | 1734.95207 | 103 | 114 |      | 5.27 | Expt1 |
| LFIGLNVQTSSEGLR                  | 20  | 226443091                                      | N-Term(iTRAQ4plex)                                                    | 1835.01946 | 103 | 99  |      | 4.98 | Expt1 |
| SIEYSPQLEDASAK                   | 3   | 149253040;183979966                            | N-Term(iTRAQ4plex), K14(iTRAQ4plex)                                   | 1825.94145 | 103 | 94  |      | 4.83 | Expt1 |
| WEQGQADYMGADSFQDNK               | 12  | 7305121                                        | N-Term(iTRAQ4plex), K18(iTRAQ4plex)                                   | 2363.09104 | 103 | 90  |      | 6.18 | Expt1 |
| VIGLSSDLQQVGGASAR                | 8   | 225637531                                      | N-Term(iTRAQ4plex)                                                    | 1801.99346 | 103 | 115 |      | 5.37 | Expt1 |
| TVQPVMGPDGLPVDASAVSNYYIQLGR      | 5   | 146219835;146219830;146219849;146231979        | N-Term(iTRAQ4plex)                                                    | 3140.62900 | 103 | 107 |      | 6.31 | Expt1 |
| EVYMGNVIQGGEGQAPTR               | 7   | 21450129                                       | N-Term(iTRAQ4plex)                                                    | 2050.01641 | 103 | 99  |      | 5.99 | Expt1 |
| LLNDEDPVVVTK                     | 18  | 28395018                                       | N-Term(iTRAQ4plex), K12(iTRAQ4plex)                                   | 1629.93242 | 103 | 91  |      | 5.86 | Expt1 |
| FSINTDDIMGTSLTVR                 | 119 | 148277039                                      | N-Term(iTRAQ4plex)                                                    | 1913.97795 | 103 | 101 |      | 6.04 | Expt1 |
| DTPFFNAWQQGGEETQVEAK             | 13  | 160707889                                      | N-Term(iTRAQ4plex), K20(iTRAQ4plex)                                   | 2520.22611 | 103 | 70  |      | 6.17 | Expt1 |

|                                  |     |                                                                                                                |                                                                     |            |     |     |      |      |       |
|----------------------------------|-----|----------------------------------------------------------------------------------------------------------------|---------------------------------------------------------------------|------------|-----|-----|------|------|-------|
| AMGIMNSFVNDIFER                  | 162 | 68131547;68226433;30061385;149264032;160420312;46049029;28316760;68226431;160420308;30089704;30061387;13386452 | N-Term(iTRAQ4plex), M2(Oxidation)                                   | 1903.92290 | 103 | 100 |      | 7.15 | Expt1 |
| TAFDEIAELDTLNEDSYK               | 14  | 149263879;6756039                                                                                              | N-Term(iTRAQ4plex), K19(iTRAQ4plex)                                 | 2433.19553 | 103 | 75  |      | 7.36 | Expt1 |
| VPPTVTSTVLK                      | 66  | 111074529                                                                                                      | N-Term(iTRAQ4plex), K11(iTRAQ4plex)                                 | 1429.88591 | 102 | 93  |      | 3.77 | Expt1 |
| EPVAETDIMATNGVVYAINTVLQPPANRPQER | 17  | 6678321                                                                                                        | N-Term(iTRAQ4plex)                                                  | 3637.87758 | 102 | 65  |      | 6.07 | Expt1 |
| YITPDQLADLYK                     | 28  | 149253386                                                                                                      | N-Term(iTRAQ4plex), K12(iTRAQ4plex)                                 | 1727.95110 | 102 | 88  |      | 5.26 | Expt1 |
| DNLTLWTSMDMQGDGEEQNK             | 6   | 226874906                                                                                                      | N-Term(iTRAQ4plex), K19(iTRAQ4plex)                                 | 2469.14811 | 102 | 106 |      | 6.64 | Expt1 |
| EVVDPEVFFNATGCLR                 | 3   | 9790161                                                                                                        | N-Term(iTRAQ4plex), C14(Methylthio)                                 | 1985.95976 | 102 | 93  |      | 5.26 | Expt1 |
| NQVALNPQNTVFDK                   | 74  | 124339829;124339826                                                                                            | N-Term(iTRAQ4plex), K15(iTRAQ4plex)                                 | 1947.05608 | 102 | 100 |      | 5.61 | Expt1 |
| SLEEANAELNK                      | 10  | 149262636;118130981                                                                                            | N-Term(iTRAQ4plex), N6(Deamidated), K12(iTRAQ4plex)                 | 1635.82952 | 102 | 73  |      | 5.03 | Expt1 |
| YLILNATQAESK                     | 11  | 31543974                                                                                                       | N-Term(iTRAQ4plex), K12(iTRAQ4plex)                                 | 1638.93498 | 102 | 92  |      | 4.72 | Expt1 |
| MDATANDVPSPYEVK                  | 13  | 112293264                                                                                                      | N-Term(iTRAQ4plex), K15(iTRAQ4plex)                                 | 1924.95903 | 102 | 82  |      | 6.06 | Expt1 |
| SLAAAGYDVEK                      | 3   | 21426823                                                                                                       | N-Term(iTRAQ4plex), K11(iTRAQ4plex)                                 | 1411.76433 | 102 | 78  |      | 4.61 | Expt1 |
| TPAILEASAGAIQNLCAGR              | 6   | 146219835;146219830;146219849;146231979                                                                        | N-Term(iTRAQ4plex), C16(Methylthio)                                 | 2046.06333 | 102 | 100 |      | 7.59 | Expt1 |
| TPNVGGPGGPQVEWTAR                | 13  | 29336026                                                                                                       | N-Term(iTRAQ4plex)                                                  | 1866.96196 | 102 | 99  |      | 5.14 | Expt1 |
| TAFDEIAELDTLNEDSYK               | 9   | 31543974                                                                                                       | N-Term(iTRAQ4plex), K19(iTRAQ4plex)                                 | 2447.21042 | 102 | 66  |      | 7.03 | Expt1 |
| ELAQVQVAAEYCR                    | 18  | 83816893                                                                                                       | N-Term(iTRAQ4plex), C14(Methylthio)                                 | 1925.93450 | 102 | 82  |      | 5.61 | Expt1 |
| NQVAMNPTNTVFDK                   | 3   | 31981690                                                                                                       | N-Term(iTRAQ4plex), M5(Oxidation), K15(iTRAQ4plex)                  | 1953.99089 | 102 | 82  |      | 4.61 | Expt1 |
| GPYPQAEALLAEAMLK                 | 3   | 31560792                                                                                                       | N-Term(iTRAQ4plex), K17(iTRAQ4plex)                                 | 2047.12003 | 101 | 50  |      | 4.76 | Expt1 |
| SVPMSTVFYPSDGVATEK               | 94  | 6678359                                                                                                        | N-Term(iTRAQ4plex), M4(Oxidation), K18(iTRAQ4plex)                  | 2219.11455 | 101 | 108 |      | 6.67 | Expt1 |
| ILDSVGEIADDDR                    | 23  | 83745120                                                                                                       | N-Term(iTRAQ4plex)                                                  | 1561.78288 | 101 | 86  |      | 4.79 | Expt1 |
| TPVVEGLTEGEEELR                  | 24  | 31560247                                                                                                       | N-Term(iTRAQ4plex)                                                  | 1930.97380 | 101 | 83  |      | 5.40 | Expt1 |
| DGDGSITTELQELTVMR                | 35  | 13386230                                                                                                       | N-Term(iTRAQ4plex)                                                  | 1823.89604 | 101 | 113 |      | 5.48 | Expt1 |
| SELEEDIPEEDIISR                  | 10  | 126518317                                                                                                      | N-Term(iTRAQ4plex)                                                  | 2031.02739 | 101 | 97  | 1.53 | 5.05 | Expt1 |
| STVISYECCPGYEK                   | 64  | 6678321                                                                                                        | N-Term(iTRAQ4plex), C8(Methylthio), C9(Methylthio), K14(iTRAQ4plex) | 1958.86028 | 101 | 88  |      | 5.24 | Expt1 |
| LVAIQVVIDQNR                     | 41  | 149257159;13385472                                                                                             | N-Term(iTRAQ4plex)                                                  | 1498.87517 | 101 | 69  |      | 4.64 | Expt1 |
| IAQLEEEEEEQNGTELINDR             | 29  | 114326446                                                                                                      | N-Term(iTRAQ4plex)                                                  | 2616.28250 | 101 | 100 | 1.19 | 6.88 | Expt1 |
| FVDGLMIHSGDPVNYVDTAVR            | 14  | 6755372                                                                                                        | N-Term(iTRAQ4plex)                                                  | 2612.30490 | 101 | 69  |      | 5.70 | Expt1 |
| DVFLGTFLEYYSR                    | 34  | 163310765                                                                                                      | N-Term(iTRAQ4plex)                                                  | 1753.89824 | 100 | 88  |      | 5.05 | Expt1 |
| IPSAVGYOPTLATDMGMTQER            | 35  | 31980648                                                                                                       | N-Term(iTRAQ4plex)                                                  | 2410.18869 | 100 | 90  |      | 6.59 | Expt1 |
| DLQEALQDYELQADTYR                | 32  | 111185907                                                                                                      | N-Term(iTRAQ4plex)                                                  | 2215.06949 | 100 | 94  | 1.35 | 6.11 | Expt1 |
| CDACPVGFTGPMVQGVGINFAK           | 18  | 6755781                                                                                                        | N-Term(iTRAQ4plex), C1(Methylthio), C4(Methylthio), K22(iTRAQ4plex) | 2591.21953 | 100 | 100 |      | 7.34 | Expt1 |
| GFFVQPTVFSNVTDEMR                | 23  | 7106242;85861182                                                                                               | N-Term(iTRAQ4plex)                                                  | 2118.04941 | 100 | 80  |      | 5.88 | Expt1 |
| TSGPPVSELITK                     | 26  | 13430890                                                                                                       | N-Term(iTRAQ4plex), K12(iTRAQ4plex)                                 | 1516.88310 | 100 | 84  |      | 5.00 | Expt1 |
| SSFFVNGLTGGQK                    | 72  | 6755040                                                                                                        | N-Term(iTRAQ4plex), N6(Deamidated), K14(iTRAQ4plex)                 | 1743.95696 | 100 | 89  |      | 5.64 | Expt1 |
| DGGSTTAGNSSQVSDGAAVLLAR          | 6   | 18700004;22122797                                                                                              | N-Term(iTRAQ4plex)                                                  | 2349.17594 | 100 | 80  |      | 6.21 | Expt1 |
| ETTDTDADQVIASFK                  | 41  | 11230802                                                                                                       | N-Term(iTRAQ4plex), K16(iTRAQ4plex)                                 | 2030.01848 | 100 | 108 |      | 6.00 | Expt1 |
| ADLNNLGTIAK                      | 14  | 40556608;6754254                                                                                               | N-Term(iTRAQ4plex), K12(iTRAQ4plex)                                 | 1530.91130 | 100 | 81  |      | 4.90 | Expt1 |
| NMNCIEMGGNPLENSGFEPGAFDGLK       | 18  | 20137008                                                                                                       | N-Term(iTRAQ4plex), C4(Methylthio), K26(iTRAQ4plex)                 | 3075.39804 | 100 | 78  |      | 4.90 | Expt1 |
| VFEVSLADLQNDVAFR                 | 29  | 94395665;149265827;254553321                                                                                   | N-Term(iTRAQ4plex)                                                  | 2096.08232 | 100 | 118 |      | 5.91 | Expt1 |
| DLSSVQTLTK                       | 7   | 115496850                                                                                                      | N-Term(iTRAQ4plex), K11(iTRAQ4plex)                                 | 1492.88078 | 100 | 84  |      | 5.18 | Expt1 |
| QLFGQMTQLNQLLGEVK                | 15  | 6755781                                                                                                        | N-Term(iTRAQ4plex), K17(iTRAQ4plex)                                 | 2235.24497 | 100 | 65  |      | 6.08 | Expt1 |
| ELPPDQAEYCIAR                    | 85  | 61097906;11230802                                                                                              | N-Term(iTRAQ4plex), C10(Methylthio)                                 | 1694.80254 | 100 | 82  |      | 4.00 | Expt1 |
| EPMTVSSDQMAK                     | 6   | 31982861                                                                                                       | N-Term(iTRAQ4plex), K12(iTRAQ4plex)                                 | 1611.80071 | 100 | 72  |      | 4.45 | Expt1 |
| STLINSFLFDLYPER                  | 8   | 6754816;228480253                                                                                              | N-Term(iTRAQ4plex)                                                  | 2026.09819 | 99  | 83  |      | 6.17 | Expt1 |
| TLTLVDTGIGMTK                    | 80  | 40556608;6754254                                                                                               | N-Term(iTRAQ4plex), K13(iTRAQ4plex)                                 | 1637.94512 | 99  | 102 |      | 5.01 | Expt1 |
| VVPVADITPNQFEALLSGR              | 8   | 26006861                                                                                                       | N-Term(iTRAQ4plex)                                                  | 2412.33121 | 99  | 77  |      | 6.31 | Expt1 |
| VPSTEAELASSLMGLFEK               | 3   | 116089273                                                                                                      | N-Term(iTRAQ4plex), K19(iTRAQ4plex)                                 | 2268.20743 | 99  | 71  |      | 6.47 | Expt1 |
| EVQGNESDLFMSYFPR                 | 63  | 110227377                                                                                                      | N-Term(iTRAQ4plex)                                                  | 2062.96782 | 99  | 110 |      | 5.97 | Expt1 |
| LMIEMDGTENK                      | 8   | 149249466;149253386;149259350                                                                                  | N-Term(iTRAQ4plex), K11(iTRAQ4plex)                                 | 1568.79387 | 99  | 63  |      | 4.51 | Expt1 |

|                                |     |                                                                 |                                                                    |            |    |     |      |      |       |
|--------------------------------|-----|-----------------------------------------------------------------|--------------------------------------------------------------------|------------|----|-----|------|------|-------|
| ALEAANADLEVK                   | 8   | 6754480                                                         | N-Term(iTRAQ4plex), K12(iTRAQ4plex)                                | 1531.86052 | 99 | 93  |      | 5.49 | Expt1 |
| MVQNLEIELQSQLAMK               | 112 | 118130981                                                       | N-Term(iTRAQ4plex), M1(Oxidation), K16(iTRAQ4plex)                 | 2179.17705 | 99 | 105 |      | 7.13 | Expt1 |
| QPDGIAVVGIFLK                  | 32  | 31982861                                                        | N-Term(iTRAQ4plex), K13(iTRAQ4plex)                                | 1644.99980 | 99 | 116 |      | 5.45 | Expt1 |
| TLQGLEIELQSQLSMK               | 26  | 6754480;6680606;226823220                                       | N-Term(iTRAQ4plex), M15(Oxidation), K16(iTRAQ4plex)                | 2122.17698 | 99 | 79  |      | 6.64 | Expt1 |
| EVQGNESDLFMSYFFR               | 29  | 110227377                                                       | N-Term(iTRAQ4plex), M11(Oxidation)                                 | 2078.96221 | 99 | 98  |      | 5.64 | Expt1 |
| ENYAELLDDGFLK                  | 36  | 6753484                                                         | N-Term(iTRAQ4plex), K13(iTRAQ4plex)                                | 1814.94682 | 99 | 90  |      | 6.18 | Expt1 |
| LLEAQLASGGVDPVNSVFLPK          | 19  | 82950147;82950149;149264086                                     | N-Term(iTRAQ4plex), K22(iTRAQ4plex)                                | 2541.45499 | 99 | 74  |      | 6.66 | Expt1 |
| NTDQASMPDNATAAQK               | 7   | 114326446;241982716;241982718                                   | N-Term(iTRAQ4plex), K15(iTRAQ4plex)                                | 1879.90837 | 99 | 100 |      | 5.80 | Expt1 |
| YALYDASFETK                    | 36  | 9790219                                                         | N-Term(iTRAQ4plex), K11(iTRAQ4plex)                                | 1595.82280 | 99 | 79  |      | 4.97 | Expt1 |
| LILPVGAPAGNQMLEQYDK            | 3   | 226530884                                                       | N-Term(iTRAQ4plex), K19(iTRAQ4plex)                                | 2331.27024 | 99 | 73  |      | 6.78 | Expt1 |
| GAEEMETVIPDVVMR                | 24  | 55741460                                                        | N-Term(iTRAQ4plex)                                                 | 1819.91045 | 99 | 91  |      | 5.54 | Expt1 |
| IMNTFSVVPSPK                   | 13  | 31981939;7106439;22165384;149253488;149253527;83030206;12963615 | N-Term(iTRAQ4plex), K12(iTRAQ4plex)                                | 1607.91203 | 99 | 73  |      | 4.55 | Expt1 |
| IEDVTPIPSDSTR                  | 48  | 31981100;63680339;149267017                                     | N-Term(iTRAQ4plex)                                                 | 1573.81975 | 99 | 75  | 1.18 | 4.59 | Expt1 |
| IISPTVGPDIETYTVPGR             | 62  | 111074529                                                       | N-Term(iTRAQ4plex)                                                 | 2337.20952 | 99 | 107 |      | 6.41 | Expt1 |
| ELGLAEGDIIDPQLFK               | 3   | 156938252;156938255                                             | N-Term(iTRAQ4plex), K17(iTRAQ4plex)                                | 2159.22342 | 99 | 67  |      | 5.45 | Expt1 |
| GDVPSVGLGPNIDLQGPGEK           | 6   | 61743961                                                        | N-Term(iTRAQ4plex), K21(iTRAQ4plex)                                | 2366.24942 | 98 | 88  |      | 7.05 | Expt1 |
| ADLEAQLLETLTEELAYMK            | 126 | 118130981                                                       | N-Term(iTRAQ4plex), K18(iTRAQ4plex)                                | 2356.22222 | 98 | 94  | 1.26 | 7.52 | Expt1 |
| IEQQLNPETLLQWTPSTMANAK         | 13  | 6678103                                                         | N-Term(iTRAQ4plex), K23(iTRAQ4plex)                                | 2915.52774 | 98 | 74  |      | 6.59 | Expt1 |
| SFVQNYPVVSIEDPFQDDWGAWQK       | 3   | 149253386                                                       | N-Term(iTRAQ4plex), K25(iTRAQ4plex)                                | 3258.56394 | 98 | 102 |      | 6.71 | Expt1 |
| GVVDSDDLPLNVS                  | 22  | 6755863                                                         | N-Term(iTRAQ4plex)                                                 | 1629.85967 | 98 | 87  |      | 4.97 | Expt1 |
| AFLSVMASPSQLCGLR               | 27  | 148277039                                                       | N-Term(iTRAQ4plex), C13(Methylthio)                                | 1869.95598 | 98 | 92  |      | 5.77 | Expt1 |
| DLADELALVDVIMEDK               | 41  | 6754524;257743039                                               | N-Term(iTRAQ4plex), K15(iTRAQ4plex)                                | 1964.01824 | 98 | 108 | 1.61 | 6.36 | Expt1 |
| AAVAASGLNTVLEGGDQFTLLAPTNEAFEK | 29  | 6678321                                                         | N-Term(iTRAQ4plex), K30(iTRAQ4plex)                                | 3322.74277 | 98 | 106 |      | 7.97 | Expt1 |
| ALLAYAFALAGNQDTK               | 50  | 148277039                                                       | N-Term(iTRAQ4plex), K16(iTRAQ4plex)                                | 1955.09014 | 98 | 107 | 1.40 | 6.54 | Expt1 |
| EVSSNAEMIQTSK                  | 6   | 6754480                                                         | N-Term(iTRAQ4plex), K13(iTRAQ4plex)                                | 1711.88103 | 98 | 92  |      | 6.42 | Expt1 |
| LQPQTITYDITVLPYMK              | 29  | 111074529                                                       | N-Term(iTRAQ4plex), K16(iTRAQ4plex)                                | 2199.20146 | 98 | 107 |      | 6.17 | Expt1 |
| DATNVGDEGGFAPNILENK            | 18  | 149253386                                                       | N-Term(iTRAQ4plex), K19(iTRAQ4plex)                                | 2249.13718 | 98 | 67  |      | 6.46 | Expt1 |
| LTFDITTFSPNTGK                 | 3   | 6755965                                                         | N-Term(iTRAQ4plex), K13(iTRAQ4plex)                                | 1716.91045 | 98 | 108 |      | 4.85 | Expt1 |
| SEDGVEGLDGETQSR                | 16  | 61743961                                                        | N-Term(iTRAQ4plex)                                                 | 1722.79057 | 98 | 105 |      | 4.84 | Expt1 |
| TIGVSNFNPLQIER                 | 48  | 160707894                                                       | N-Term(iTRAQ4plex)                                                 | 1731.95561 | 98 | 95  |      | 4.98 | Expt1 |
| ITSPLMEPSSIEK                  | 11  | 7106387;94388526;94388799                                       | N-Term(iTRAQ4plex), K13(iTRAQ4plex)                                | 1719.94609 | 98 | 89  |      | 4.67 | Expt1 |
| DLPAAAPAGPASFAR                | 16  | 13384778                                                        | N-Term(iTRAQ4plex)                                                 | 1626.87651 | 98 | 88  |      | 4.59 | Expt1 |
| VDNSSLTGESEPOTR                | 22  | 110225337;21450277;30409956;21450321                            | N-Term(iTRAQ4plex)                                                 | 1763.85576 | 98 | 81  |      | 5.51 | Expt1 |
| DVDIADAAYYFER                  | 46  | 31560359                                                        | N-Term(iTRAQ4plex)                                                 | 1691.81194 | 98 | 78  | 1.17 | 4.61 | Expt1 |
| VSWDPSPSVLYGK                  | 87  | 111074529                                                       | N-Term(iTRAQ4plex), K14(iTRAQ4plex)                                | 1819.98650 | 97 | 83  | 1.20 | 5.85 | Expt1 |
| ADVDAASLPEVEGGVK               | 16  | 61743961                                                        | N-Term(iTRAQ4plex), K15(iTRAQ4plex)                                | 1773.95220 | 97 | 101 |      | 5.27 | Expt1 |
| SVTEQGAELSNEER                 | 41  | 149269348;6756041                                               | N-Term(iTRAQ4plex)                                                 | 1692.81706 | 97 | 91  |      | 6.19 | Expt1 |
| FSMVIDNIVK                     | 34  | 6755114                                                         | N-Term(iTRAQ4plex), N7(Deamidated), K11(iTRAQ4plex)                | 1511.84123 | 97 | 85  |      | 5.30 | Expt1 |
| NQLLQEELGALQLR                 | 27  | 112421039                                                       | N-Term(iTRAQ4plex)                                                 | 1769.00699 | 97 | 84  |      | 6.19 | Expt1 |
| NMNCIEMGGNPLENSGFEPGAFDGLK     | 44  | 20137008                                                        | N-Term(iTRAQ4plex), M2(Oxidation), C4(Methylthio), K26(iTRAQ4plex) | 3091.38791 | 97 | 79  |      | 7.00 | Expt1 |
| EGLELPEDEEEK                   | 17  | 40556608;6754254                                                | N-Term(iTRAQ4plex), K12(iTRAQ4plex)                                | 1704.84404 | 97 | 71  |      | 4.29 | Expt1 |
| TNELGDGGVGLVLQGLQNPTCK         | 7   | 31981748;285402638;285402659                                    | N-Term(iTRAQ4plex), C21(Methylthio), K22(iTRAQ4plex)               | 2547.32151 | 97 | 84  |      | 7.20 | Expt1 |
| VSNGAGSMVSLVADENPFAQGALR       | 14  | 28916693                                                        | N-Term(iTRAQ4plex), N3(Deamidated)                                 | 2622.30448 | 97 | 103 |      | 6.94 | Expt1 |
| GTGGVDTAATGSVFDISNLDR          | 12  | 6753428                                                         | N-Term(iTRAQ4plex)                                                 | 2197.09136 | 97 | 121 |      | 7.63 | Expt1 |
| LSLQDAVNQGLIDQDMATR            | 44  | 82950147;82950149;149264086                                     | N-Term(iTRAQ4plex)                                                 | 2232.14336 | 97 | 120 | 1.21 | 6.96 | Expt1 |
| EYFGQFGEIEAIELPIDPK            | 12  | 146260280;6754222                                               | N-Term(iTRAQ4plex), K19(iTRAQ4plex)                                | 2483.29888 | 97 | 107 |      | 6.21 | Expt1 |
| DVPFGQFQTVSDVVK                | 30  | 6678103                                                         | N-Term(iTRAQ4plex), K15(iTRAQ4plex)                                | 1942.02117 | 97 | 124 |      | 5.73 | Expt1 |
| LFIGGLSFETTEESLR               | 35  | 149274531;32880197;109134362                                    | N-Term(iTRAQ4plex)                                                 | 1943.03081 | 97 | 91  |      | 5.50 | Expt1 |



|                                      |     |                                                 |                                                                                     |            |    |     |      |      |       |
|--------------------------------------|-----|-------------------------------------------------|-------------------------------------------------------------------------------------|------------|----|-----|------|------|-------|
| EAAQMDMVDNGVEDLR                     | 19  | 10092608                                        | N-Term(iTRAQ4plex)                                                                  | 1936.88848 | 97 | 86  | 1.46 | 5.64 | Expt1 |
| LPMGTAENLAAK                         | 5   | 29126205                                        | N-Term(iTRAQ4plex), K13(iTRAQ4plex)                                                 | 1634.88982 | 96 | 115 |      | 5.34 | Expt1 |
| GGAGGMGIGMGIAGSSGGSLCIFSGNDGGLLSGSEK | 19  | 149262636;118130981                             | N-Term(iTRAQ4plex), M6(Oxidation), M10(Oxidation), C22(Methylthio), K37(iTRAQ4plex) | 3581.66469 | 96 | 75  |      | 8.23 | Expt1 |
| ILDVNDNPPIFSQTIFK                    | 10  | 110625833                                       | N-Term(iTRAQ4plex), K17(iTRAQ4plex)                                                 | 2249.24961 | 96 | 72  |      | 5.53 | Expt1 |
| VAPEEVSEVIFGHVLTAGCGQNPTR            | 3   | 110625948;148747461                             | N-Term(iTRAQ4plex), C19(Methylthio)                                                 | 2800.40018 | 96 | 56  |      | 6.79 | Expt1 |
| LDGNPLTQSSLPDPMYECLR                 | 59  | 160333372                                       | N-Term(iTRAQ4plex), C18(Methylthio)                                                 | 2439.15337 | 96 | 105 |      | 5.49 | Expt1 |
| CELLYEGPPDDEAAMGIK                   | 9   | 33859482                                        | N-Term(iTRAQ4plex), C1(Methylthio), K18(iTRAQ4plex)                                 | 2285.07657 | 96 | 60  |      | 5.15 | Expt1 |
| SLNPSTEFISSTK                        | 7   | 6678103                                         | N-Term(iTRAQ4plex), K13(iTRAQ4plex)                                                 | 1698.91814 | 96 | 90  |      | 4.90 | Expt1 |
| EILGTAQSVGCNVVDGR                    | 34  | 149251813;94390243;149262832;94407735;160333553 | N-Term(iTRAQ4plex), C11(Methylthio)                                                 | 1808.87883 | 96 | 109 |      | 5.46 | Expt1 |
| LLEAQAATGGIVDLLSR                    | 25  | 111185907                                       | N-Term(iTRAQ4plex)                                                                  | 1871.08220 | 96 | 99  |      | 5.93 | Expt1 |
| SVSSPLLSTDAVSFLR                     | 22  | 21040233                                        | N-Term(iTRAQ4plex)                                                                  | 1823.00798 | 96 | 90  |      | 4.89 | Expt1 |
| CVLTTVDPDTGIIDR                      | 10  | 19526848                                        | N-Term(iTRAQ4plex), C1(Methylthio)                                                  | 1807.91155 | 96 | 82  |      | 4.45 | Expt1 |
| SLPASLVEPDFVMTDFAK                   | 21  | 6678483                                         | N-Term(iTRAQ4plex), K18(iTRAQ4plex)                                                 | 2255.19156 | 96 | 79  |      | 5.63 | Expt1 |
| DLAILLGLMDPVEK                       | 20  | 6671549                                         | N-Term(iTRAQ4plex), K14(iTRAQ4plex)                                                 | 1815.05632 | 96 | 101 | 1.36 | 4.89 | Expt1 |
| FQVNNNDQLLLQR                        | 141 | 148277039                                       | N-Term(iTRAQ4plex), N4(Deamidated)                                                  | 1746.92986 | 96 | 89  |      | 6.06 | Expt1 |
| MYDSVLALPGALQATR                     | 21  | 8393144                                         | N-Term(iTRAQ4plex)                                                                  | 1850.00273 | 96 | 82  |      | 4.99 | Expt1 |
| LTVEDPVTVEYITR                       | 37  | 7106389;254692831                               | N-Term(iTRAQ4plex)                                                                  | 1778.96672 | 96 | 82  |      | 4.65 | Expt1 |
| VIFLEDDDDVAADVVDGR                   | 5   | 7305085                                         | N-Term(iTRAQ4plex)                                                                  | 1876.98235 | 96 | 102 |      | 5.18 | Expt1 |
| EFAGEDTSDLFLEER                      | 9   | 38604071                                        | N-Term(iTRAQ4plex)                                                                  | 1901.88884 | 96 | 102 |      | 5.19 | Expt1 |
| LPEGQLPEAELPAAQAAAAAGAGLK            | 26  | 149263538;149263685                             | N-Term(iTRAQ4plex), K25(iTRAQ4plex)                                                 | 2632.46189 | 96 | 89  |      | 7.09 | Expt1 |
| DVEDESTGLEK                          | 3   | 6678103                                         | N-Term(iTRAQ4plex), K11(iTRAQ4plex)                                                 | 1509.75591 | 96 | 82  |      | 4.19 | Expt1 |
| NMGGPYGGNGYPGSGSGGGYGR               | 16  | 149274531;32880197;109134362                    | N-Term(iTRAQ4plex)                                                                  | 2334.00615 | 96 | 190 |      | 6.87 | Expt1 |
| TIGGGDDSFNTFFSETGAGK                 | 25  | 6755901;34740335;6678465;6678469                | N-Term(iTRAQ4plex), K20(iTRAQ4plex)                                                 | 2296.10552 | 96 | 117 |      | 6.49 | Expt1 |
| YTPSQSGAAASELSFISNHAY                | 7   | 6671539                                         | N-Term(iTRAQ4plex)                                                                  | 2402.14360 | 96 | 103 |      | 6.40 | Expt1 |
| YMCENQATISSK                         | 27  | 163310765                                       | N-Term(iTRAQ4plex), C3(Methylthio), K12(iTRAQ4plex)                                 | 1708.79985 | 95 | 81  |      | 5.57 | Expt1 |
| SLEYLDSFNQMSK                        | 80  | 160333372                                       | N-Term(iTRAQ4plex), M12(Oxidation), K14(iTRAQ4plex)                                 | 1979.01006 | 95 | 83  |      | 6.22 | Expt1 |
| ELAEDGYSQVEVR                        | 30  | 6755372                                         | N-Term(iTRAQ4plex)                                                                  | 1567.77397 | 95 | 80  |      | 4.81 | Expt1 |
| AIFLADGNVFTTGFSR                     | 25  | 94394941;31542413                               | N-Term(iTRAQ4plex)                                                                  | 1859.98223 | 95 | 95  | 1.23 | 5.37 | Expt1 |
| YLAEVATGDDK                          | 27  | 134023662                                       | N-Term(iTRAQ4plex), K11(iTRAQ4plex)                                                 | 1469.77580 | 95 | 84  |      | 4.62 | Expt1 |
| FGDAVVQSDMK                          | 3   | 124339829;124339826                             | N-Term(iTRAQ4plex), K11(iTRAQ4plex)                                                 | 1484.76726 | 95 | 71  |      | 4.34 | Expt1 |
| APDVDVSVAGPDAALK                     | 15  | 61743961                                        | N-Term(iTRAQ4plex), K16(iTRAQ4plex)                                                 | 1812.99753 | 95 | 89  |      | 5.71 | Expt1 |
| TQLEELEDLQATEDAK                     | 14  | 33598964;114326446;241982716;241982718          | N-Term(iTRAQ4plex), K17(iTRAQ4plex)                                                 | 2250.13236 | 95 | 69  |      | 5.27 | Expt1 |
| ENAAFYQFFEEAQSTEAYLK                 | 3   | 82950147;82950149;149264086                     | N-Term(iTRAQ4plex), K20(iTRAQ4plex)                                                 | 2674.30185 | 95 | 50  |      | 6.91 | Expt1 |
| TQAVAGENIFIK                         | 45  | 157057148;127139277                             | N-Term(iTRAQ4plex), K12(iTRAQ4plex)                                                 | 1578.91472 | 95 | 96  |      | 5.66 | Expt1 |
| FDQLFDESDPFVCLK                      | 20  | 165932375;165932379;165932377;165932381         | N-Term(iTRAQ4plex), K16(iTRAQ4plex)                                                 | 2232.10233 | 95 | 82  |      | 5.15 | Expt1 |
| DSTYSMSSTLTLTK                       | 12  | 149255637;149255639;149255641                   | N-Term(iTRAQ4plex), K14(iTRAQ4plex)                                                 | 1822.94304 | 95 | 96  |      | 5.21 | Expt1 |
| DMGEMVTQQTDAQYMFLR                   | 5   | 117938332;117938334                             | N-Term(iTRAQ4plex)                                                                  | 2365.07663 | 95 | 76  |      | 5.65 | Expt1 |
| AFYNNVLGEYEEYITK                     | 20  | 8393866                                         | N-Term(iTRAQ4plex), K16(iTRAQ4plex)                                                 | 2241.14170 | 95 | 76  |      | 5.34 | Expt1 |
| QFLGQMTQLNQLLGEVK                    | 18  | 6755781                                         | N-Term(iTRAQ4plex), M6(Oxidation), K17(iTRAQ4plex)                                  | 2251.24216 | 95 | 73  |      | 5.49 | Expt1 |
| TPAQYDASELK                          | 26  | 149260099;6996913                               | N-Term(iTRAQ4plex), K11(iTRAQ4plex)                                                 | 1510.80144 | 95 | 65  |      | 4.81 | Expt1 |
| DQEGQDVLLFIDNIFR                     | 7   | 31980648                                        | N-Term(iTRAQ4plex)                                                                  | 2066.07060 | 95 | 98  |      | 5.64 | Expt1 |
| A EVTAFNTSIDAELR                     | 44  | 112421039                                       | N-Term(iTRAQ4plex)                                                                  | 1780.92461 | 95 | 94  |      | 5.38 | Expt1 |
| ITVDPPTDGPVK                         | 34  | 111074529                                       | N-Term(iTRAQ4plex), K12(iTRAQ4plex)                                                 | 1532.84526 | 95 | 99  |      | 5.07 | Expt1 |
| TIAQDYGVCLK                          | 17  | 94400195;149267887;6754976                      | N-Term(iTRAQ4plex), K10(iTRAQ4plex)                                                 | 1395.80840 | 95 | 78  |      | 4.54 | Expt1 |
| FITPESTVMLLEAQAATGGIIDPHR            | 7   | 82950147;82950149;149264086                     | N-Term(iTRAQ4plex)                                                                  | 2811.49106 | 95 | 92  |      | 7.49 | Expt1 |
| VDVPAADLSDQVPDTSR                    | 28  | 126518317                                       | N-Term(iTRAQ4plex)                                                                  | 2274.08891 | 95 | 112 |      | 5.49 | Expt1 |
| ADLEAQLETLTEELAYMK                   | 146 | 118130981                                       | N-Term(iTRAQ4plex), M17(Oxidation), K18(iTRAQ4plex)                                 | 2372.22342 | 95 | 92  | 1.50 | 8.14 | Expt1 |
| FDTGNLCMVTTGGANLGR                   | 19  | 6677805                                         | N-Term(iTRAQ4plex), C7(Methylthio)                                                  | 1915.89910 | 95 | 96  |      | 5.12 | Expt1 |

|                           |     |                                                                   |                                                      |            |    |     |      |      |       |
|---------------------------|-----|-------------------------------------------------------------------|------------------------------------------------------|------------|----|-----|------|------|-------|
| YMTISGFQIETIDR            | 11  | 6753060                                                           | N-Term(iTRAQ4plex)                                   | 1946.97026 | 95 | 96  |      | 4.96 | Expt1 |
| MYDSMLALPQDLQAAR          | 3   | 6753440                                                           | N-Term(iTRAQ4plex)                                   | 1966.99065 | 95 | 59  |      | 4.73 | Expt1 |
| QIVAGTNLFIK               | 11  | 6681071                                                           | N-Term(iTRAQ4plex), K11(iTRAQ4plex)                  | 1491.92180 | 95 | 75  |      | 4.91 | Expt1 |
| SVGDGETVEFDVVEGEK         | 19  | 149252935;149262189;208065<br>32;47059495;117956377;11320<br>5059 | N-Term(iTRAQ4plex), K17(iTRAQ4plex)                  | 2084.03105 | 95 | 123 | 1.17 | 6.09 | Expt1 |
| TTDGVYEGVAIGGDR           | 10  | 29293809                                                          | N-Term(iTRAQ4plex)                                   | 1653.82012 | 94 | 95  |      | 4.73 | Expt1 |
| VAVLGASGGIGQPLSLLK        | 13  | 31982186                                                          | N-Term(iTRAQ4plex), K19(iTRAQ4plex)                  | 2081.30179 | 94 | 82  |      | 5.78 | Expt1 |
| DMILPEMVGSMGVVYNGK        | 3   | 6677799;94377390                                                  | N-Term(iTRAQ4plex), N17(Deamidated), K19(iTRAQ4plex) | 2342.21317 | 94 | 54  |      | 6.17 | Expt1 |
| GPAIGGALPGISIQPEGNLQMPGIK | 19  | 61743961                                                          | N-Term(iTRAQ4plex), K26(iTRAQ4plex)                  | 2760.53867 | 94 | 69  |      | 6.89 | Expt1 |
| FAMEPEEFDSDTLR            | 6   | 86198316                                                          | N-Term(iTRAQ4plex), M3(Oxidation)                    | 1846.83354 | 94 | 86  |      | 4.28 | Expt1 |
| TTIPEEEEEEEPIGVAVEEER     | 25  | 188219589                                                         | N-Term(iTRAQ4plex)                                   | 2816.30216 | 94 | 89  |      | 5.50 | Expt1 |
| VGIGAFPTEQDNEIGELLQTR     | 9   | 31560737                                                          | N-Term(iTRAQ4plex)                                   | 2431.26780 | 94 | 81  |      | 5.76 | Expt1 |
| ATSNVFMFDDQSQIQEFK        | 11  | 21728376;71037403;19827855<br>3                                   | N-Term(iTRAQ4plex), M8(Oxidation), K18(iTRAQ4plex)   | 2395.19345 | 94 | 97  | 1.69 | 6.26 | Expt1 |
| AVFVDLEPTVIDEVR           | 82  | 6755901;34740335;51765047;8<br>2930560;6678469                    | N-Term(iTRAQ4plex)                                   | 1846.01384 | 94 | 95  |      | 5.68 | Expt1 |
| QGQYSPMAIEEQVAVIYAGVR     | 3   | 6680748                                                           | N-Term(iTRAQ4plex)                                   | 2453.26480 | 94 | 72  |      | 7.62 | Expt1 |
| AVTEQGAELSNEER            | 25  | 149263879;6756039                                                 | N-Term(iTRAQ4plex)                                   | 1676.82280 | 94 | 78  |      | 5.71 | Expt1 |
| NAPAIIFDELDAIPK           | 16  | 225543319;94408011                                                | N-Term(iTRAQ4plex), K17(iTRAQ4plex)                  | 2099.20365 | 94 | 87  | 1.41 | 4.88 | Expt1 |
| EMEENFALEAANYQDTIGR       | 10  | 31982755                                                          | N-Term(iTRAQ4plex)                                   | 2345.08696 | 94 | 111 | 1.47 | 6.28 | Expt1 |
| QGIPFVGQVLLVDGR           | 138 | 148277039                                                         | N-Term(iTRAQ4plex)                                   | 1742.01323 | 94 | 89  |      | 6.51 | Expt1 |
| ATENDIYNFFSPLNPVR         | 71  | 19527048;10946928                                                 | N-Term(iTRAQ4plex)                                   | 2141.08037 | 94 | 94  |      | 6.47 | Expt1 |
| ALTVPELTQQVFDK            | 60  | 7106439                                                           | N-Term(iTRAQ4plex), K15(iTRAQ4plex)                  | 1948.10538 | 94 | 80  |      | 5.82 | Expt1 |
| ENAEVDGDDDAEEMEA          | 3   | 13385624                                                          | N-Term(iTRAQ4plex), K17(iTRAQ4plex)                  | 2154.92143 | 93 | 93  |      | 5.51 | Expt1 |
| GGNTLTGMALNFIR            | 57  | 111074529                                                         | N-Term(iTRAQ4plex)                                   | 1608.86907 | 93 | 87  |      | 5.35 | Expt1 |
| LYMVSASGSMK               | 6   | 226246550;226246552                                               | N-Term(iTRAQ4plex), K12(iTRAQ4plex)                  | 1576.80254 | 93 | 77  |      | 4.75 | Expt1 |
| LAALNPESNTSGLDIFAK        | 16  | 15617203                                                          | N-Term(iTRAQ4plex), K18(iTRAQ4plex)                  | 2149.18100 | 93 | 82  |      | 5.45 | Expt1 |
| SGSLSLTQFADMISLK          | 27  | 82950147;82950149;14926408<br>6                                   | N-Term(iTRAQ4plex), K16(iTRAQ4plex)                  | 1986.08574 | 93 | 115 |      | 6.05 | Expt1 |
| GVVDSDELPLNISR            | 126 | 40556608;6754254;13385998                                         | N-Term(iTRAQ4plex)                                   | 1657.89104 | 93 | 91  |      | 4.79 | Expt1 |
| MAPYGGPDAAPGALDYK         | 38  | 11230802                                                          | N-Term(iTRAQ4plex), K17(iTRAQ4plex)                  | 2053.03325 | 93 | 112 |      | 6.02 | Expt1 |
| WTEYGLTFTEK               | 31  | 6755963                                                           | N-Term(iTRAQ4plex), K11(iTRAQ4plex)                  | 1662.86894 | 93 | 101 |      | 4.05 | Expt1 |
| GYADIVQLLAK               | 6   | 22267440                                                          | N-Term(iTRAQ4plex), K12(iTRAQ4plex)                  | 1591.96977 | 93 | 99  |      | 4.88 | Expt1 |
| DDGSWEVIEGYR              | 13  | 6680027                                                           | N-Term(iTRAQ4plex)                                   | 1569.73064 | 93 | 61  |      | 5.02 | Expt1 |
| MTGLVDEAIDTK              | 3   | 31543942                                                          | N-Term(iTRAQ4plex), K12(iTRAQ4plex)                  | 1580.84221 | 93 | 65  |      | 4.90 | Expt1 |
| DMTSEELDILR               | 12  | 21450277                                                          | N-Term(iTRAQ4plex)                                   | 1580.76335 | 93 | 73  |      | 4.35 | Expt1 |
| AQEACGPLEMDSALSVVQNLEK    | 3   | 227116327                                                         | N-Term(iTRAQ4plex), C5(Methylthio), K22(iTRAQ4plex)  | 2666.31992 | 93 | 96  |      | 6.65 | Expt1 |
| TSIAIDTIINQK              | 11  | 6680748                                                           | N-Term(iTRAQ4plex), K12(iTRAQ4plex)                  | 1604.95073 | 93 | 77  |      | 4.87 | Expt1 |
| AILVDLEPGTMDSVR           | 38  | 33859488;7106439;21746161;1<br>2963615                            | N-Term(iTRAQ4plex)                                   | 1759.94121 | 93 | 84  |      | 4.86 | Expt1 |
| TSPFQALGITK               | 12  | 94383772;6671569                                                  | N-Term(iTRAQ4plex), K12(iTRAQ4plex)                  | 1601.92204 | 93 | 73  |      | 5.66 | Expt1 |
| GLVLIASFQYLQK             | 52  | 163310765                                                         | N-Term(iTRAQ4plex), K13(iTRAQ4plex)                  | 1768.06682 | 93 | 92  |      | 6.41 | Expt1 |
| GVTFNVTITVDTK             | 10  | 15617203                                                          | N-Term(iTRAQ4plex), K12(iTRAQ4plex)                  | 1569.87651 | 93 | 99  |      | 5.06 | Expt1 |
| VFTTQELVQAFTHAPAALEADR    | 3   | 22122515                                                          | N-Term(iTRAQ4plex)                                   | 2559.33927 | 93 | 56  |      | 6.99 | Expt1 |
| TFTTQETITNAETAK           | 11  | 94380203;254553458                                                | N-Term(iTRAQ4plex), K15(iTRAQ4plex)                  | 1944.01665 | 93 | 107 |      | 7.18 | Expt1 |
| AGAGSATLSMAYAGAR          | 16  | 31982186                                                          | N-Term(iTRAQ4plex)                                   | 1598.80742 | 92 | 88  |      | 5.73 | Expt1 |
| QNLPEMFQYENSLR            | 63  | 54607171;113195684                                                | N-Term(iTRAQ4plex)                                   | 2026.02317 | 92 | 79  | 1.62 | 6.82 | Expt1 |
| GFFDNTEENLTYLQK           | 29  | 82950147;82950149;14926408<br>6                                   | N-Term(iTRAQ4plex), K17(iTRAQ4plex)                  | 2317.20444 | 92 | 74  |      | 6.22 | Expt1 |
| SLFNSTSDFGMSETK           | 5   | 6678103                                                           | N-Term(iTRAQ4plex), M13(Oxidation), K17(iTRAQ4plex)  | 2171.01010 | 92 | 78  |      | 6.67 | Expt1 |
| NLEWIAGGTWTPSALK          | 53  | 22203747                                                          | N-Term(iTRAQ4plex), K16(iTRAQ4plex)                  | 2032.11162 | 92 | 91  |      | 6.32 | Expt1 |
| IIGLDQVAGMSETALPGAFK      | 6   | 114326446                                                         | N-Term(iTRAQ4plex), K20(iTRAQ4plex)                  | 2306.27561 | 92 | 72  |      | 6.15 | Expt1 |
| QVTITGSAASISLAQYLINAR     | 6   | 6754994                                                           | N-Term(iTRAQ4plex)                                   | 2321.30362 | 92 | 92  |      | 6.15 | Expt1 |
| YFGTGDSSGSPTELLQLEAEK     | 8   | 111185907                                                         | N-Term(iTRAQ4plex), K24(iTRAQ4plex)                  | 2816.42063 | 92 | 78  |      | 6.19 | Expt1 |
| DIELVMSQANVSR             | 13  | 41350312;163965357                                                | N-Term(iTRAQ4plex)                                   | 1605.84136 | 92 | 79  |      | 4.87 | Expt1 |
| GLLIEPAANSYLLAER          | 49  | 6678329                                                           | N-Term(iTRAQ4plex)                                   | 1874.05510 | 92 | 98  |      | 6.63 | Expt1 |

|                          |     |                                                                    |                                                      |            |    |     |      |      |       |
|--------------------------|-----|--------------------------------------------------------------------|------------------------------------------------------|------------|----|-----|------|------|-------|
| TPSYEPQETDSLQGMETK       | 12  | 112421039                                                          | N-Term(iTRAQ4plex), K18(iTRAQ4plex)                  | 2329.11655 | 92 | 84  |      | 6.10 | Expt1 |
| SFLGGDSPSMVDYLTPWPFQR    | 12  | 6754090                                                            | N-Term(iTRAQ4plex), M10(Oxidation)                   | 2649.25859 | 92 | 108 |      | 7.48 | Expt1 |
| VPDVLCECPDAK             | 12  | 61743961                                                           | N-Term(iTRAQ4plex), C8(Methylthio), K12(iTRAQ4plex)  | 1634.80474 | 92 | 83  |      | 4.71 | Expt1 |
| DAVLNAWAEDVDLR           | 65  | 31981562                                                           | N-Term(iTRAQ4plex)                                   | 1730.88994 | 92 | 85  |      | 5.38 | Expt1 |
| YQEVTNNLEFAK             | 6   | 42558248;162329568;162329566                                       | N-Term(iTRAQ4plex), K12(iTRAQ4plex)                  | 1743.91899 | 92 | 64  |      | 4.90 | Expt1 |
| AVAEPGIQLK               | 9   | 162287140;6755781                                                  | N-Term(iTRAQ4plex), K10(iTRAQ4plex)                  | 1313.80913 | 92 | 60  |      | 3.90 | Expt1 |
| NLLSSPNPEGINIQPAPPTGPR   | 25  | 124487435                                                          | N-Term(iTRAQ4plex)                                   | 2677.41373 | 92 | 61  |      | 7.49 | Expt1 |
| NATNVEQAFMTMAAEIK        | 6   | 21313162                                                           | N-Term(iTRAQ4plex), K17(iTRAQ4plex)                  | 2157.10086 | 92 | 72  |      | 5.28 | Expt1 |
| LPAAGVGMVMATVK           | 18  | 12584986;149255181;149255570;149269218;149272300                   | N-Term(iTRAQ4plex), K15(iTRAQ4plex)                  | 1747.97429 | 92 | 127 |      | 4.72 | Expt1 |
| EVVQEILQFQEDPQTK         | 8   | 112421039                                                          | N-Term(iTRAQ4plex), K16(iTRAQ4plex)                  | 2219.18735 | 92 | 58  |      | 5.55 | Expt1 |
| EADIDGDQVNYEEFVQMMTAK    | 21  | 6753244                                                            | N-Term(iTRAQ4plex), K22(iTRAQ4plex)                  | 2778.29203 | 92 | 100 |      | 6.57 | Expt1 |
| EANIDGDQVNYEEFVQMMTAK    | 29  | 149255253;149255689                                                | N-Term(iTRAQ4plex), N3(Deamidated), K22(iTRAQ4plex)  | 2778.29203 | 92 | 100 |      | 6.57 | Expt1 |
| MQQVEASLQPETLR           | 33  | 124517726;86476056;160333710;6680586;130503301;148747546;269973939 | N-Term(iTRAQ4plex)                                   | 1773.93083 | 92 | 71  |      | 5.56 | Expt1 |
| MTNGFSGALDTEICQR         | 15  | 225543319;94408011                                                 | N-Term(iTRAQ4plex), N3(Deamidated), C14(Methylthio)  | 1933.85820 | 92 | 79  |      | 5.22 | Expt1 |
| GPEGPQPPGHVGGPDECEILDIMK | 4   | 6753484                                                            | N-Term(iTRAQ4plex), C20(Methylthio), K28(iTRAQ4plex) | 3170.56704 | 91 | 50  |      | 6.21 | Expt1 |
| EDQSILCTGESGAGK          | 3   | 29336026;33598964;114326446;241982716;241982718                    | N-Term(iTRAQ4plex), C7(Methylthio), K15(iTRAQ4plex)  | 1828.86333 | 91 | 112 |      | 5.40 | Expt1 |
| QVQSLTCEVDALK            | 24  | 31982755                                                           | N-Term(iTRAQ4plex), C7(Methylthio), K13(iTRAQ4plex)  | 1767.92986 | 91 | 110 |      | 5.78 | Expt1 |
| SLLQAVANLPYK             | 42  | 111074529                                                          | N-Term(iTRAQ4plex), K12(iTRAQ4plex)                  | 1604.96623 | 91 | 91  |      | 5.53 | Expt1 |
| LYTLVLTDPDAPSR           | 36  | 8479452                                                            | N-Term(iTRAQ4plex)                                   | 1704.93389 | 91 | 88  |      | 4.70 | Expt1 |
| FYEGSELVADSGVTIDTMR      | 21  | 6755781                                                            | N-Term(iTRAQ4plex), M19(Oxidation)                   | 2351.12308 | 91 | 80  |      | 5.72 | Expt1 |
| FAPPQPAEPWSFVK           | 33  | 117553604;247269929                                                | N-Term(iTRAQ4plex), K14(iTRAQ4plex)                  | 1889.02715 | 91 | 85  |      | 4.52 | Expt1 |
| NAGTCLSPAVIVGLLR         | 12  | 52353955                                                           | N-Term(iTRAQ4plex), C5(Methylthio)                   | 1773.98686 | 91 | 81  |      | 5.58 | Expt1 |
| ENDDVSEDLVQQDQVDLYEAGELK | 8   | 31981302;158966670                                                 | N-Term(iTRAQ4plex), K25(iTRAQ4plex)                  | 3138.52988 | 91 | 75  |      | 6.86 | Expt1 |
| IIPGFMCQGGDFTR           | 80  | 149257773;6679439                                                  | N-Term(iTRAQ4plex), C7(Methylthio)                   | 1731.81682 | 91 | 82  |      | 5.03 | Expt1 |
| GQVGGDVNVEMDAAPGVDSLR    | 40  | 154090941;21489935                                                 | N-Term(iTRAQ4plex)                                   | 2230.09087 | 91 | 125 | 1.18 | 6.19 | Expt1 |
| SVSTPSEAGSQDSDGAVGSR     | 5   | 6753658                                                            | N-Term(iTRAQ4plex)                                   | 2094.96245 | 91 | 100 |      | 4.39 | Expt1 |
| VDALMDEINFMK             | 178 | 20911031                                                           | N-Term(iTRAQ4plex), M11(Oxidation), K12(iTRAQ4plex)  | 1729.87956 | 91 | 92  |      | 5.61 | Expt1 |
| MLSNENFEEYLR             | 7   | 149260240                                                          | N-Term(iTRAQ4plex)                                   | 1688.81206 | 91 | 59  |      | 5.47 | Expt1 |
| FTQAGSEVSALLGR           | 39  | 31980648                                                           | N-Term(iTRAQ4plex)                                   | 1579.86003 | 91 | 87  |      | 5.39 | Expt1 |
| VIAINVDDPDAANYK          | 25  | 27754065                                                           | N-Term(iTRAQ4plex), K15(iTRAQ4plex)                  | 1906.01848 | 91 | 93  | 1.23 | 5.41 | Expt1 |
| AGLENSLAEVECR            | 52  | 226823220                                                          | N-Term(iTRAQ4plex), C12(Methylthio)                  | 1580.75469 | 91 | 86  |      | 5.96 | Expt1 |
| YWVLVYEQEPLSCDEPILSNK    | 6   | 84794522                                                           | N-Term(iTRAQ4plex), C14(Methylthio), K22(iTRAQ4plex) | 2987.48069 | 91 | 61  |      | 5.91 | Expt1 |
| AAVLWGVNQPFSEIEIVAPPK    | 41  | 31560625                                                           | N-Term(iTRAQ4plex), K22(iTRAQ4plex)                  | 2682.48594 | 91 | 74  |      | 7.25 | Expt1 |
| ISLGLPVGAVINCADNTGAK     | 21  | 12584986;149255181;149255570;149269218                             | N-Term(iTRAQ4plex), C13(Methylthio), K20(iTRAQ4plex) | 2247.21311 | 91 | 85  |      | 5.62 | Expt1 |
| EITALAPSTMK              | 132 | 6671509;6752954;6671507;157823889;14192922;33563240                | N-Term(iTRAQ4plex), K11(iTRAQ4plex)                  | 1449.82463 | 91 | 74  |      | 4.13 | Expt1 |
| ISLGGACGAGGYGSR          | 204 | 20911031                                                           | N-Term(iTRAQ4plex), C7(Methylthio)                   | 1515.71794 | 91 | 109 |      | 6.66 | Expt1 |
| AIPDLTAPVAVAQAVSNLVR     | 8   | 31543942                                                           | N-Term(iTRAQ4plex)                                   | 2220.28836 | 91 | 75  |      | 6.03 | Expt1 |
| AVCMSLNTTAAIEAWAR        | 21  | 6755901;34740335;6678465;6678467;51765047;82930560;8394493;6678469 | N-Term(iTRAQ4plex), C3(Methylthio)                   | 1997.97771 | 91 | 105 |      | 5.24 | Expt1 |
| FAMEPEEFSDTLR            | 27  | 86198316                                                           | N-Term(iTRAQ4plex)                                   | 1830.83757 | 90 | 86  | 1.35 | 5.18 | Expt1 |
| TAAENEFVTLK              | 31  | 54607171                                                           | N-Term(iTRAQ4plex), K11(iTRAQ4plex)                  | 1510.84123 | 90 | 91  |      | 5.33 | Expt1 |
| YSGCLTESNLIK             | 19  | 6678329                                                            | N-Term(iTRAQ4plex), C4(Methylthio), K12(iTRAQ4plex)  | 1661.85112 | 90 | 88  |      | 5.30 | Expt1 |
| DLMVGDSEASLR             | 36  | 22122825                                                           | N-Term(iTRAQ4plex)                                   | 1478.73125 | 90 | 76  |      | 4.03 | Expt1 |
| SLGYAVVNFQPPADAER        | 14  | 22507391;34419622;31560656                                         | N-Term(iTRAQ4plex)                                   | 2073.01958 | 90 | 100 | 1.16 | 5.12 | Expt1 |
| AAFYGIYDTAK              | 3   | 22094075                                                           | N-Term(iTRAQ4plex), K11(iTRAQ4plex)                  | 1507.80754 | 90 | 82  |      | 4.91 | Expt1 |
| YQAVTATLEEK              | 12  | 94400480;51771609;31981945                                         | N-Term(iTRAQ4plex), K11(iTRAQ4plex)                  | 1540.85222 | 90 | 92  |      | 4.84 | Expt1 |
| ELISNASDALDK             | 16  | 6755863;40556608                                                   | N-Term(iTRAQ4plex), K12(iTRAQ4plex)                  | 1563.85393 | 90 | 90  |      | 5.42 | Expt1 |
| AGTQIENIDEDFR            | 23  | 11230802                                                           | N-Term(iTRAQ4plex)                                   | 1651.80742 | 90 | 83  |      | 5.00 | Expt1 |

|                         |     |                                                                                                                                                                                                                                                                                                                      |                                                                      |            |    |     |  |      |       |
|-------------------------|-----|----------------------------------------------------------------------------------------------------------------------------------------------------------------------------------------------------------------------------------------------------------------------------------------------------------------------|----------------------------------------------------------------------|------------|----|-----|--|------|-------|
| FQEEADSVSQTAK           | 20  | 111185907                                                                                                                                                                                                                                                                                                            | N-Term(iTRAQ4plex), K14(iTRAQ4plex)                                  | 1840.95391 | 90 | 105 |  | 5.15 | Expt1 |
| VVDALGNAIDGK            | 3   | 6680748                                                                                                                                                                                                                                                                                                              | N-Term(iTRAQ4plex), K12(iTRAQ4plex)                                  | 1459.84319 | 90 | 79  |  | 4.51 | Expt1 |
| LVLEQVVTSIASVADTAEEK    | 10  | 29789199                                                                                                                                                                                                                                                                                                             | N-Term(iTRAQ4plex), K20(iTRAQ4plex)                                  | 2390.33310 | 90 | 79  |  | 6.09 | Expt1 |
| GAAGALMVYDITR           | 16  | 18390323                                                                                                                                                                                                                                                                                                             | N-Term(iTRAQ4plex)                                                   | 1481.79314 | 90 | 79  |  | 4.85 | Expt1 |
| AFSGLTQNPESELR          | 26  | 6755781                                                                                                                                                                                                                                                                                                              | N-Term(iTRAQ4plex)                                                   | 1805.95378 | 90 | 93  |  | 5.85 | Expt1 |
| GGAEQFMEETER            | 14  | 238814391                                                                                                                                                                                                                                                                                                            | N-Term(iTRAQ4plex)                                                   | 1527.68779 | 90 | 73  |  | 4.31 | Expt1 |
| YSNPSSCFGEESLAFCEK      | 15  | 148277039                                                                                                                                                                                                                                                                                                            | N-Term(iTRAQ4plex), C7(Methylthio), C16(Methylthio), K18(iTRAQ4plex) | 2378.00664 | 90 | 106 |  | 6.18 | Expt1 |
| GPSFNVASPESDFGVSLK      | 12  | 61743961                                                                                                                                                                                                                                                                                                             | N-Term(iTRAQ4plex), K18(iTRAQ4plex)                                  | 2126.11008 | 90 | 61  |  | 6.56 | Expt1 |
| LGEIVTTIPTIGFNVETVEYK   | 6   | 6680722;6680718;6680716;6671571;6680720                                                                                                                                                                                                                                                                              | N-Term(iTRAQ4plex), K21(iTRAQ4plex)                                  | 2611.45456 | 90 | 64  |  | 6.86 | Expt1 |
| ALEQANTELEVK            | 17  | 226823220                                                                                                                                                                                                                                                                                                            | N-Term(iTRAQ4plex), K12(iTRAQ4plex)                                  | 1632.91350 | 90 | 99  |  | 4.90 | Expt1 |
| AASADSTTEGTPTDGFVTLSTK  | 13  | 41152517;283945572;283945575;283945579                                                                                                                                                                                                                                                                               | N-Term(iTRAQ4plex), K22(iTRAQ4plex)                                  | 2445.22685 | 90 | 111 |  | 5.58 | Expt1 |
| GMVFGIPDGVLELVPQR       | 6   | 149253040;183979966                                                                                                                                                                                                                                                                                                  | N-Term(iTRAQ4plex)                                                   | 1971.08896 | 90 | 80  |  | 5.06 | Expt1 |
| EIVLADVIDNDSWR          | 11  | 13385434                                                                                                                                                                                                                                                                                                             | N-Term(iTRAQ4plex)                                                   | 1788.92620 | 90 | 65  |  | 4.72 | Expt1 |
| MDENQFVAVTSTNAAK        | 8   | 209862992;6681219;40254595;209862923;40068507                                                                                                                                                                                                                                                                        | N-Term(iTRAQ4plex), K16(iTRAQ4plex)                                  | 2014.02165 | 90 | 90  |  | 5.83 | Expt1 |
| ETAPPTETNLGMAK          | 3   | 148747189                                                                                                                                                                                                                                                                                                            | N-Term(iTRAQ4plex), K14(iTRAQ4plex)                                  | 1747.91789 | 90 | 64  |  | 3.86 | Expt1 |
| VDIETPNLEGLTGP          | 14  | 61743961                                                                                                                                                                                                                                                                                                             | N-Term(iTRAQ4plex), K16(iTRAQ4plex)                                  | 1972.08843 | 90 | 113 |  | 4.68 | Expt1 |
| YQVDPDACFSAK            | 21  | 6755963                                                                                                                                                                                                                                                                                                              | N-Term(iTRAQ4plex), C8(Methylthio), K12(iTRAQ4plex)                  | 1677.79155 | 90 | 88  |  | 4.47 | Expt1 |
| GAAGALLYVDITR           | 22  | 30525051;10946940                                                                                                                                                                                                                                                                                                    | N-Term(iTRAQ4plex)                                                   | 1463.83660 | 90 | 84  |  | 4.63 | Expt1 |
| TLLLAGESDVSTAILDK       | 19  | 6678321                                                                                                                                                                                                                                                                                                              | N-Term(iTRAQ4plex), K19(iTRAQ4plex)                                  | 2276.28458 | 89 | 89  |  | 7.36 | Expt1 |
| WGEEAGAEYVVESTGVFTTMEK  | 47  | 149248895;149249272;149251040;149251044;149251140;149251223;149251463;149251509;149251903;149251905;149251911;149251964;149251966;149257623;149258770;149258772;149258934;149258938;149259154;149259607;149260709;149263021;149265154;149265502;149265922;149266427;149266431;149268472;149268967;82996390;149273204 | N-Term(iTRAQ4plex), K21(iTRAQ4plex)                                  | 2579.25932 | 89 | 100 |  | 6.47 | Expt1 |
| TVPFCSTFAAFFTR          | 60  | 6678359                                                                                                                                                                                                                                                                                                              | N-Term(iTRAQ4plex), C5(Methylthio)                                   | 1784.86382 | 89 | 99  |  | 5.32 | Expt1 |
| TSAILTGNAGQDPPGPEK      | 6   | 31980838                                                                                                                                                                                                                                                                                                             | N-Term(iTRAQ4plex), K20(iTRAQ4plex)                                  | 2200.14493 | 89 | 87  |  | 7.37 | Expt1 |
| DAGYGGISLAVEGPSK        | 3   | 145966915                                                                                                                                                                                                                                                                                                            | N-Term(iTRAQ4plex), K16(iTRAQ4plex)                                  | 1808.96453 | 89 | 88  |  | 4.95 | Expt1 |
| NLEPEWAAAATEVK          | 8   | 149262992;58037267                                                                                                                                                                                                                                                                                                   | N-Term(iTRAQ4plex), K14(iTRAQ4plex)                                  | 1816.97478 | 89 | 109 |  | 4.95 | Expt1 |
| TGEAIVDAALSALR          | 27  | 149262992;58037267                                                                                                                                                                                                                                                                                                   | N-Term(iTRAQ4plex)                                                   | 1530.86662 | 89 | 91  |  | 5.10 | Expt1 |
| ILLAELEQLK              | 38  | 31982755                                                                                                                                                                                                                                                                                                             | N-Term(iTRAQ4plex), K10(iTRAQ4plex)                                  | 1457.92314 | 89 | 74  |  | 4.68 | Expt1 |
| IVEVFEIGPK              | 124 | 111074529                                                                                                                                                                                                                                                                                                            | N-Term(iTRAQ4plex), K10(iTRAQ4plex)                                  | 1418.85442 | 89 | 85  |  | 4.59 | Expt1 |
| GVDLQESNPASR            | 20  | 113866024                                                                                                                                                                                                                                                                                                            | N-Term(iTRAQ4plex)                                                   | 1416.71880 | 89 | 72  |  | 4.23 | Expt1 |
| LLAVAATAPPDAPNREEVFDER  | 2   | 31543942                                                                                                                                                                                                                                                                                                             | N-Term(iTRAQ4plex)                                                   | 2525.31626 | 89 |     |  | 3.77 | Expt1 |
| GDGPICLVLPTR            | 19  | 40068493;93587673;40068491;83816893                                                                                                                                                                                                                                                                                  | N-Term(iTRAQ4plex), C6(Methylthio)                                   | 1501.80242 | 89 | 86  |  | 5.27 | Expt1 |
| LPCVEDYLSAILNR          | 22  | 163310765                                                                                                                                                                                                                                                                                                            | N-Term(iTRAQ4plex), C3(Methylthio)                                   | 1795.92998 | 89 | 74  |  | 5.64 | Expt1 |
| VCSPISGLYQAGAGPAGGFGAQP | 32  | 124339826                                                                                                                                                                                                                                                                                                            | N-Term(iTRAQ4plex), C2(Methylthio), K28(iTRAQ4plex)                  | 2905.49613 | 89 | 73  |  | 6.87 | Expt1 |

|                         |     |                                                                                                                                                                                                                                                                                                                                                                                                                                             |                                                     |            |    |     |      |      |       |
|-------------------------|-----|---------------------------------------------------------------------------------------------------------------------------------------------------------------------------------------------------------------------------------------------------------------------------------------------------------------------------------------------------------------------------------------------------------------------------------------------|-----------------------------------------------------|------------|----|-----|------|------|-------|
| LISWYDNEYGYSNR          | 28  | 149248895;149249564;149249566;149250207;149251040;149251044;149251140;149251223;149251463;149251509;149251903;149251905;149251911;149251964;149251966;149252413;149253819;149253823;149257623;149258770;149258772;149258934;149258938;149259607;149259652;149259964;149260709;149260711;149260720;94387946;149263021;149265154;149265502;149265922;149266302;149266427;149266431;149268472;149268967;82996390;149273204;149274387;149275059 | N-Term(iTRAQ4plex)                                  | 1923.90105 | 89 | 91  |      | 5.31 | Expt1 |
| VVWGPEIELIAIATGGR       | 3   | 6671702                                                                                                                                                                                                                                                                                                                                                                                                                                     | N-Term(iTRAQ4plex)                                  | 1883.05364 | 89 | 81  |      | 5.27 | Expt1 |
| DIVEVLFQPNVELNQQNK      | 3   | 22267440                                                                                                                                                                                                                                                                                                                                                                                                                                    | N-Term(iTRAQ4plex), K19(iTRAQ4plex)                 | 2516.36753 | 89 | 54  |      | 5.47 | Expt1 |
| MQQNIQELEEQLLEESAR      | 5   | 114326446                                                                                                                                                                                                                                                                                                                                                                                                                                   | N-Term(iTRAQ4plex), M1(Oxidation)                   | 2493.15909 | 89 | 55  |      | 5.62 | Expt1 |
| DITDTSIGAYWTSAPGMVR     | 29  | 111074529                                                                                                                                                                                                                                                                                                                                                                                                                                   | N-Term(iTRAQ4plex), M17(Oxidation)                  | 2201.06938 | 89 | 94  |      | 6.23 | Expt1 |
| AVTGYNDPETGNIISLFQAMNK  | 10  | 82950147;82950149;149264086                                                                                                                                                                                                                                                                                                                                                                                                                 | N-Term(iTRAQ4plex), K22(iTRAQ4plex)                 | 2671.37711 | 89 | 85  |      | 6.01 | Expt1 |
| NALESYAFNMK             | 19  | 124339838;124339829;124339826                                                                                                                                                                                                                                                                                                                                                                                                               | N-Term(iTRAQ4plex), K11(iTRAQ4plex)                 | 1575.81474 | 89 | 88  |      | 4.99 | Expt1 |
| CITIEDVNDNLPTFTR        | 3   | 7305007                                                                                                                                                                                                                                                                                                                                                                                                                                     | N-Term(iTRAQ4plex), C1(Methylthio)                  | 2154.07505 | 89 | 86  |      | 4.66 | Expt1 |
| VFSGVVSTGLK             | 6   | 149253258;33859482                                                                                                                                                                                                                                                                                                                                                                                                                          | N-Term(iTRAQ4plex), K11(iTRAQ4plex)                 | 1381.83428 | 88 | 77  |      | 4.69 | Expt1 |
| QNLEPMFEQYISNLR         | 78  | 54607171;113195684                                                                                                                                                                                                                                                                                                                                                                                                                          | N-Term(iTRAQ4plex), M6(Oxidation)                   | 2042.01761 | 88 | 77  | 1.22 | 5.74 | Expt1 |
| NQVAMNPTNTVFDAK         | 30  | 31981690                                                                                                                                                                                                                                                                                                                                                                                                                                    | N-Term(iTRAQ4plex), K15(iTRAQ4plex)                 | 1938.00090 | 88 | 105 |      | 5.57 | Expt1 |
| DLAILLGMLDPVEK          | 39  | 6671549                                                                                                                                                                                                                                                                                                                                                                                                                                     | N-Term(iTRAQ4plex), M8(Oxidation), K14(iTRAQ4plex)  | 1831.05522 | 88 | 84  | 1.27 | 5.20 | Expt1 |
| GGVPETTELLK             | 149 | 163310769                                                                                                                                                                                                                                                                                                                                                                                                                                   | N-Term(iTRAQ4plex), K11(iTRAQ4plex)                 | 1431.83171 | 88 | 73  |      | 4.37 | Expt1 |
| EAALSTALSEK             | 3   | 9506843;162287370;161760667                                                                                                                                                                                                                                                                                                                                                                                                                 | N-Term(iTRAQ4plex), K11(iTRAQ4plex)                 | 1407.79180 | 88 | 70  |      | 3.97 | Expt1 |
| VQIALAQYSGDPR           | 82  | 111074529                                                                                                                                                                                                                                                                                                                                                                                                                                   | N-Term(iTRAQ4plex)                                  | 1561.84746 | 88 | 62  | 1.18 | 4.36 | Expt1 |
| GYTLVEYETYK             | 3   | 162287296;162287294;91064865                                                                                                                                                                                                                                                                                                                                                                                                                | N-Term(iTRAQ4plex), K11(iTRAQ4plex)                 | 1653.86638 | 88 | 64  |      | 4.27 | Expt1 |
| DDGVFVQEVQMNSPAAR       | 38  | 90403607;61743961                                                                                                                                                                                                                                                                                                                                                                                                                           | N-Term(iTRAQ4plex)                                  | 2006.97429 | 88 | 92  | 1.36 | 6.24 | Expt1 |
| LPNGLVIASLENYAPLSR      | 5   | 22267442                                                                                                                                                                                                                                                                                                                                                                                                                                    | N-Term(iTRAQ4plex), N3(Deamidated)                  | 2072.15677 | 88 | 65  |      | 5.84 | Expt1 |
| FGNPLLQDVESYDPVLNPLNLR  | 3   | 134288917                                                                                                                                                                                                                                                                                                                                                                                                                                   | N-Term(iTRAQ4plex)                                  | 2742.46579 | 88 | 65  |      | 5.80 | Expt1 |
| YLGGTDDLTK              | 3   | 117553604                                                                                                                                                                                                                                                                                                                                                                                                                                   | N-Term(iTRAQ4plex), K10(iTRAQ4plex)                 | 1370.74407 | 88 | 58  |      | 3.49 | Expt1 |
| IAQSDYIPTQQDVLRL        | 17  | 149260278;41054806                                                                                                                                                                                                                                                                                                                                                                                                                          | N-Term(iTRAQ4plex)                                  | 1891.00420 | 88 | 87  |      | 4.79 | Expt1 |
| FSINTDDIMGTSLTVR        | 91  | 148277039                                                                                                                                                                                                                                                                                                                                                                                                                                   | N-Term(iTRAQ4plex), M9(Oxidation)                   | 1929.97270 | 88 | 93  |      | 6.22 | Expt1 |
| GSMYDGLADNYYNYGTTSR     | 33  | 9790161                                                                                                                                                                                                                                                                                                                                                                                                                                     | N-Term(iTRAQ4plex)                                  | 2242.97954 | 88 | 102 |      | 5.57 | Expt1 |
| GPVLNNTSDVAQDIAICDAR    | 3   | 163965368                                                                                                                                                                                                                                                                                                                                                                                                                                   | N-Term(iTRAQ4plex), C18(Methylthio)                 | 2333.13150 | 88 | 98  |      | 6.77 | Expt1 |
| SDGNQLTPEEIENDLVTVTQR   | 5   | 23346525                                                                                                                                                                                                                                                                                                                                                                                                                                    | N-Term(iTRAQ4plex)                                  | 2601.31968 | 88 | 79  |      | 5.33 | Expt1 |
| SLLVIPNTLAVNAAQDSTDLVAK | 8   | 110625624                                                                                                                                                                                                                                                                                                                                                                                                                                   | N-Term(iTRAQ4plex), K23(iTRAQ4plex)                 | 2641.50986 | 88 | 85  |      | 5.77 | Expt1 |
| TEDPDLPAFYFDPLNPIISR    | 3   | 115583687                                                                                                                                                                                                                                                                                                                                                                                                                                   | N-Term(iTRAQ4plex)                                  | 2601.31803 | 88 | 50  |      | 5.18 | Expt1 |
| WMDEAQUALDTADR          | 7   | 225543482                                                                                                                                                                                                                                                                                                                                                                                                                                   | N-Term(iTRAQ4plex)                                  | 1665.76811 | 88 | 64  |      | 3.68 | Expt1 |
| AFGAPGEAFSEPEILFANSMGK  | 17  | 130502130                                                                                                                                                                                                                                                                                                                                                                                                                                   | N-Term(iTRAQ4plex), K23(iTRAQ4plex)                 | 2687.34610 | 88 | 77  |      | 6.03 | Expt1 |
| DSPTGANSYVIK            | 3   | 6680846                                                                                                                                                                                                                                                                                                                                                                                                                                     | N-Term(iTRAQ4plex), K13(iTRAQ4plex)                 | 1652.91338 | 88 | 78  |      | 5.27 | Expt1 |
| APVPTGEVYFADSFDR        | 27  | 6671664                                                                                                                                                                                                                                                                                                                                                                                                                                     | N-Term(iTRAQ4plex)                                  | 1914.93755 | 88 | 87  |      | 4.44 | Expt1 |
| ILVVNAAVYFVGK           | 15  | 6678103                                                                                                                                                                                                                                                                                                                                                                                                                                     | N-Term(iTRAQ4plex), K12(iTRAQ4plex)                 | 1581.96745 | 88 | 108 |      | 4.64 | Expt1 |
| WLTEENVEAWHTANAVFSPSR   | 7   | 148277039                                                                                                                                                                                                                                                                                                                                                                                                                                   | N-Term(iTRAQ4plex)                                  | 2588.27689 | 88 | 75  |      | 6.52 | Expt1 |
| GEAGPSGPPGPTGAR         | 21  | 34328108                                                                                                                                                                                                                                                                                                                                                                                                                                    | N-Term(iTRAQ4plex)                                  | 1451.73271 | 87 | 98  |      | 5.30 | Expt1 |
| WELLQVNTSTR             | 56  | 51092293                                                                                                                                                                                                                                                                                                                                                                                                                                    | N-Term(iTRAQ4plex), N8(Deamidated)                  | 1619.85393 | 87 | 82  | 1.17 | 4.60 | Expt1 |
| GFSVVAADTPELQR          | 23  | 6754508                                                                                                                                                                                                                                                                                                                                                                                                                                     | N-Term(iTRAQ4plex)                                  | 1562.83013 | 87 | 65  |      | 4.91 | Expt1 |
| NALFLDHTAWK             | 33  | 148277039                                                                                                                                                                                                                                                                                                                                                                                                                                   | N-Term(iTRAQ4plex), C5(Methylthio), K11(iTRAQ4plex) | 1615.82952 | 87 | 102 |      | 4.67 | Expt1 |
| GTVLSIDDSLQR            | 14  | 169234958;32129201                                                                                                                                                                                                                                                                                                                                                                                                                          | N-Term(iTRAQ4plex)                                  | 1447.78765 | 87 | 91  |      | 4.20 | Expt1 |

|                     |     |                                                                                                                                                                                                                                                                                                                                                                                                                                                       |                                                     |            |    |     |      |      |       |
|---------------------|-----|-------------------------------------------------------------------------------------------------------------------------------------------------------------------------------------------------------------------------------------------------------------------------------------------------------------------------------------------------------------------------------------------------------------------------------------------------------|-----------------------------------------------------|------------|----|-----|------|------|-------|
| AVPVSNIAPAAVGR      | 9   | 88758582;88758584                                                                                                                                                                                                                                                                                                                                                                                                                                     | N-Term(iTRAQ4plex)                                  | 1465.86101 | 87 | 78  |      | 4.23 | Expt1 |
| IIIEDDVEK           | 20  | 160333881                                                                                                                                                                                                                                                                                                                                                                                                                                             | N-Term(iTRAQ4plex), K10(iTRAQ4plex)                 | 1490.81560 | 87 | 77  |      | 4.10 | Expt1 |
| ALDTMNFVVIK         | 3   | 6754972;31560656;255652857                                                                                                                                                                                                                                                                                                                                                                                                                            | N-Term(iTRAQ4plex), K11(iTRAQ4plex)                 | 1554.84880 | 87 | 75  |      | 4.65 | Expt1 |
| LIALLEVLSQLK        | 7   | 125347376;124487139;145966915                                                                                                                                                                                                                                                                                                                                                                                                                         | N-Term(iTRAQ4plex), K11(iTRAQ4plex)                 | 1514.98393 | 87 | 71  |      | 4.44 | Expt1 |
| LATQLTGPVMPPIR      | 36  | 149251177;149252074;149258092                                                                                                                                                                                                                                                                                                                                                                                                                         | N-Term(iTRAQ4plex)                                  | 1540.90447 | 87 | 68  |      | 4.94 | Expt1 |
| DVMICPDTSLEDAK      | 12  | 55741460                                                                                                                                                                                                                                                                                                                                                                                                                                              | N-Term(iTRAQ4plex), C5(Methylthio), K14(iTRAQ4plex) | 1870.88303 | 87 | 82  |      | 4.35 | Expt1 |
| VVDLMAYMASK         | 22  | 149248895;149249564;149249566;149251040;149251044;149251140;149251223;149251463;149251509;149251903;149251905;149251911;149251964;149251966;149252413;149253819;149253823;149257623;149258744;149258770;149258772;149258934;149258938;149259607;149259652;149259964;149260709;149260711;94387946;149260748;149263021;149265154;149265922;149266302;149266427;149266431;149268472;149268967;149270469;149270673;149272161;94408118;149273204;149275059 | N-Term(iTRAQ4plex), K11(iTRAQ4plex)                 | 1515.82280 | 87 | 84  |      | 4.40 | Expt1 |
| LTFDSSFSPNTGK       | 15  | 6755963                                                                                                                                                                                                                                                                                                                                                                                                                                               | N-Term(iTRAQ4plex), K13(iTRAQ4plex)                 | 1688.88005 | 87 | 113 |      | 5.22 | Expt1 |
| ANLQIDQINTDLNLER    | 26  | 114326446                                                                                                                                                                                                                                                                                                                                                                                                                                             | N-Term(iTRAQ4plex)                                  | 2014.07060 | 87 | 96  | 1.17 | 5.24 | Expt1 |
| VSVISVEEPPQR        | 15  | 149257125;149257127;38142460                                                                                                                                                                                                                                                                                                                                                                                                                          | N-Term(iTRAQ4plex)                                  | 1483.82402 | 87 | 77  |      | 4.45 | Expt1 |
| SAPDFTATAVVDGAFK    | 32  | 148747558                                                                                                                                                                                                                                                                                                                                                                                                                                             | N-Term(iTRAQ4plex), K16(iTRAQ4plex)                 | 1885.00200 | 87 | 120 |      | 5.70 | Expt1 |
| ISGVGIDQPPYGIINQK   | 3   | 169234958;32129201;32129205                                                                                                                                                                                                                                                                                                                                                                                                                           | N-Term(iTRAQ4plex), K19(iTRAQ4plex)                 | 2347.33884 | 87 | 79  |      | 5.80 | Expt1 |
| ITSGPFEPDLVK        | 7   | 6755100                                                                                                                                                                                                                                                                                                                                                                                                                                               | N-Term(iTRAQ4plex), K12(iTRAQ4plex)                 | 1654.89922 | 87 | 85  |      | 5.21 | Expt1 |
| SYSPYDMLESIK        | 35  | 149260099;6996913                                                                                                                                                                                                                                                                                                                                                                                                                                     | N-Term(iTRAQ4plex), K12(iTRAQ4plex)                 | 1720.87724 | 87 | 86  |      | 4.80 | Expt1 |
| NNVILQPLQPDTPYK     | 110 | 111074529                                                                                                                                                                                                                                                                                                                                                                                                                                             | N-Term(iTRAQ4plex), K15(iTRAQ4plex)                 | 2028.13701 | 87 | 70  |      | 5.67 | Expt1 |
| TILSNQTVDPINVEITLK  | 13  | 51767763;149264373;149270496;149270498                                                                                                                                                                                                                                                                                                                                                                                                                | N-Term(iTRAQ4plex), K19(iTRAQ4plex)                 | 2415.36333 | 87 | 114 |      | 5.84 | Expt1 |
| ASLEAAIADAQR        | 23  | 114145561                                                                                                                                                                                                                                                                                                                                                                                                                                             | N-Term(iTRAQ4plex)                                  | 1488.78264 | 87 | 72  |      | 4.65 | Expt1 |
| ADSLTDDINFLR        | 67  | 54607171                                                                                                                                                                                                                                                                                                                                                                                                                                              | N-Term(iTRAQ4plex)                                  | 1523.78583 | 87 | 90  |      | 4.91 | Expt1 |
| EALTYDQALLGDR       | 22  | 15808988                                                                                                                                                                                                                                                                                                                                                                                                                                              | N-Term(iTRAQ4plex)                                  | 1537.79949 | 87 | 82  |      | 4.55 | Expt1 |
| YSYVCPDLVK          | 12  | 23956222                                                                                                                                                                                                                                                                                                                                                                                                                                              | N-Term(iTRAQ4plex), C5(Methylthio), K10(iTRAQ4plex) | 1520.77532 | 87 | 60  |      | 4.12 | Expt1 |
| LAAVDATMNVQLASR     | 18  | 58037267                                                                                                                                                                                                                                                                                                                                                                                                                                              | N-Term(iTRAQ4plex)                                  | 1703.92900 | 87 | 104 |      | 5.50 | Expt1 |
| ITNLTQQLEQASIVK     | 18  | 82950147;149264086                                                                                                                                                                                                                                                                                                                                                                                                                                    | N-Term(iTRAQ4plex), K15(iTRAQ4plex)                 | 1974.15232 | 87 | 65  |      | 5.49 | Expt1 |
| NVEGQDMLYQSLK       | 3   | 78711838;21313640;88853578                                                                                                                                                                                                                                                                                                                                                                                                                            | N-Term(iTRAQ4plex), K13(iTRAQ4plex)                 | 1812.94328 | 87 | 84  |      | 5.66 | Expt1 |
| AEVLSEEPILK         | 5   | 13385296                                                                                                                                                                                                                                                                                                                                                                                                                                              | N-Term(iTRAQ4plex), K11(iTRAQ4plex)                 | 1515.88664 | 87 | 73  |      | 4.40 | Expt1 |
| YNILGTNTIMDK        | 13  | 160333923                                                                                                                                                                                                                                                                                                                                                                                                                                             | N-Term(iTRAQ4plex), K12(iTRAQ4plex)                 | 1670.90862 | 87 | 90  |      | 4.36 | Expt1 |
| GGGGNFGPGPGSNFR     | 39  | 149274531;32880197;109134362                                                                                                                                                                                                                                                                                                                                                                                                                          | N-Term(iTRAQ4plex)                                  | 1521.73284 | 87 | 97  |      | 5.18 | Expt1 |
| TGAIVDVPVGEELLGR    | 41  | 6680748                                                                                                                                                                                                                                                                                                                                                                                                                                               | N-Term(iTRAQ4plex)                                  | 1768.99675 | 87 | 106 | 1.19 | 5.18 | Expt1 |
| GLTVVQAFQELVEPK     | 22  | 19882207                                                                                                                                                                                                                                                                                                                                                                                                                                              | N-Term(iTRAQ4plex), K15(iTRAQ4plex)                 | 1946.11907 | 87 | 94  | 1.79 | 5.96 | Expt1 |
| DYETATLSDIK         | 27  | 11230802                                                                                                                                                                                                                                                                                                                                                                                                                                              | N-Term(iTRAQ4plex), K11(iTRAQ4plex)                 | 1543.81145 | 86 | 68  | 1.43 | 4.71 | Expt1 |
| EDEEESLNEVGYDDIGGCR | 24  | 225543319;94408011                                                                                                                                                                                                                                                                                                                                                                                                                                    | N-Term(iTRAQ4plex), C18(Methylthio)                 | 2318.95171 | 86 | 104 |      | 5.65 | Expt1 |
| LDVPQNLMTFGK        | 3   | 31791059                                                                                                                                                                                                                                                                                                                                                                                                                                              | N-Term(iTRAQ4plex), K11(iTRAQ4plex)                 | 1549.87200 | 86 | 77  |      | 3.81 | Expt1 |
| DSLQDGEFTMDLR       | 53  | 6755040                                                                                                                                                                                                                                                                                                                                                                                                                                               | N-Term(iTRAQ4plex)                                  | 1783.86931 | 86 | 86  |      | 5.30 | Expt1 |
| VVQCSDLGLDK         | 48  | 6681143                                                                                                                                                                                                                                                                                                                                                                                                                                               | N-Term(iTRAQ4plex), C4(Methylthio), K11(iTRAQ4plex) | 1510.78655 | 86 | 85  |      | 4.85 | Expt1 |
| EEASDYLEDITIK       | 12  | 6755863                                                                                                                                                                                                                                                                                                                                                                                                                                               | N-Term(iTRAQ4plex), K13(iTRAQ4plex)                 | 1813.93035 | 86 | 91  |      | 5.51 | Expt1 |
| QVVDAYSAYEVIK       | 17  | 6754524;257743039                                                                                                                                                                                                                                                                                                                                                                                                                                     | N-Term(iTRAQ4plex), K11(iTRAQ4plex)                 | 1538.86760 | 86 | 84  |      | 5.24 | Expt1 |
| GTDVNVFTILTISR      | 48  | 124517663                                                                                                                                                                                                                                                                                                                                                                                                                                             | N-Term(iTRAQ4plex)                                  | 1667.91203 | 86 | 81  |      | 5.39 | Expt1 |

|                                     |     |                                                                                                                                                                                    |                                                                                      |            |    |     |      |       |       |
|-------------------------------------|-----|------------------------------------------------------------------------------------------------------------------------------------------------------------------------------------|--------------------------------------------------------------------------------------|------------|----|-----|------|-------|-------|
| ACADATLSQITNNIDPVGR                 | 16  | 6680045                                                                                                                                                                            | N-Term(iTRAQ4plex), C2(Methylthio)                                                   | 2149.05229 | 86 | 90  | 6.02 | Expt1 |       |
| LQWMAGGFTTGEALQYTR                  | 24  | 6753484                                                                                                                                                                            | N-Term(iTRAQ4plex), M4(Oxidation)                                                    | 2190.08017 | 86 | 93  | 7.42 | Expt1 |       |
| DIQDSLTVSNEVQTAK                    | 16  | 6671672                                                                                                                                                                            | N-Term(iTRAQ4plex), K16(iTRAQ4plex)                                                  | 2036.07730 | 86 | 83  | 5.76 | Expt1 |       |
| SPASDTYIVFGEAK                      | 26  | 41350312;163965357                                                                                                                                                                 | N-Term(iTRAQ4plex), K14(iTRAQ4plex)                                                  | 1772.93254 | 86 | 128 | 5.18 | Expt1 |       |
| CCAEANPPACYGTVLAEFQPLVEEPK          | 3   | 163310765                                                                                                                                                                          | N-Term(iTRAQ4plex), C1(Methylthio), C2(Methylthio), C10(Methylthio), K26(iTRAQ4plex) | 3205.44504 | 86 | 58  | 6.82 | Expt1 |       |
| GDLGIEIPA EK                        | 22  | 153792772;153792131;31981562                                                                                                                                                       | N-Term(iTRAQ4plex), K11(iTRAQ4plex)                                                  | 1429.81865 | 86 | 56  | 4.14 | Expt1 |       |
| AEAGAGSATEFQFR                      | 6   | 13399310                                                                                                                                                                           | N-Term(iTRAQ4plex)                                                                   | 1585.77324 | 86 | 95  | 5.15 | Expt1 |       |
| ELSTTLNADEAVTR                      | 8   | 112293266                                                                                                                                                                          | N-Term(iTRAQ4plex)                                                                   | 1663.86467 | 86 | 89  | 4.00 | Expt1 |       |
| AVVVLVENFYK                         | 19  | 21312760                                                                                                                                                                           | N-Term(iTRAQ4plex), K11(iTRAQ4plex)                                                  | 1568.93694 | 86 | 89  | 4.36 | Expt1 |       |
| LLILADMADVYK                        | 8   | 6753294                                                                                                                                                                            | N-Term(iTRAQ4plex), K12(iTRAQ4plex)                                                  | 1652.96221 | 86 | 84  | 4.72 | Expt1 |       |
| DNPGVVTCLDEAR                       | 14  | 6678483                                                                                                                                                                            | N-Term(iTRAQ4plex), C8(Methylthio)                                                   | 1578.74114 | 86 | 80  | 4.53 | Expt1 |       |
| FLTTELSLDQDR                        | 6   | 6753618                                                                                                                                                                            | N-Term(iTRAQ4plex)                                                                   | 1609.82244 | 86 | 74  | 4.46 | Expt1 |       |
| VLVGFANFEVAFDEK                     | 24  | 42415475                                                                                                                                                                           | N-Term(iTRAQ4plex), K15(iTRAQ4plex)                                                  | 1955.04119 | 86 | 97  | 5.60 | Expt1 |       |
| LVTLEEFVLASTQR                      | 17  | 6679158;254750698                                                                                                                                                                  | N-Term(iTRAQ4plex)                                                                   | 1650.92266 | 86 | 85  | 4.82 | Expt1 |       |
| EMEENFALEAANYQDTIGR                 | 14  | 31982755                                                                                                                                                                           | N-Term(iTRAQ4plex), M2(Oxidation)                                                    | 2361.08567 | 86 | 77  | 6.57 | Expt1 |       |
| NIPGITLLNVSK                        | 25  | 30794450                                                                                                                                                                           | N-Term(iTRAQ4plex), K12(iTRAQ4plex)                                                  | 1556.96079 | 86 | 78  | 4.43 | Expt1 |       |
| IILDLISEPIK                         | 13  | 13384620                                                                                                                                                                           | N-Term(iTRAQ4plex), K12(iTRAQ4plex)                                                  | 1629.01592 | 86 | 79  | 1.48 | 4.47  | Expt1 |
| EDIYAVEIVGGATR                      | 15  | 112293266                                                                                                                                                                          | N-Term(iTRAQ4plex)                                                                   | 1636.86870 | 86 | 77  | 4.60 | Expt1 |       |
| TDLEMQIQLNEELAYLK                   | 8   | 226823220                                                                                                                                                                          | N-Term(iTRAQ4plex), K18(iTRAQ4plex)                                                  | 2468.26169 | 86 | 80  | 5.07 | Expt1 |       |
| TIISYIDEQFER                        | 8   | 6754816;228480253                                                                                                                                                                  | N-Term(iTRAQ4plex)                                                                   | 1657.85979 | 86 | 67  | 3.95 | Expt1 |       |
| CLVLTGFGGYDK                        | 7   | 33859662                                                                                                                                                                           | N-Term(iTRAQ4plex), C1(Methylthio), K12(iTRAQ4plex)                                  | 1606.82207 | 86 | 77  | 4.09 | Expt1 |       |
| EFEEDLTGIDDR                        | 12  | 149260240                                                                                                                                                                          | N-Term(iTRAQ4plex)                                                                   | 1582.73723 | 86 | 65  | 4.94 | Expt1 |       |
| IIDVYVYNASNNELVR                    | 60  | 149257598;149250154;82922494;28491531;94387984;149264053                                                                                                                           | N-Term(iTRAQ4plex)                                                                   | 1863.01360 | 86 | 95  | 1.22 | 4.78  | Expt1 |
| FSNEEIAMATVTALR                     | 41  | 6671539                                                                                                                                                                            | N-Term(iTRAQ4plex)                                                                   | 1796.93718 | 86 | 87  | 5.47 | Expt1 |       |
| YVDIAPCNK                           | 17  | 149251929;149252176;149270876                                                                                                                                                      | N-Term(iTRAQ4plex), C8(Methylthio), K11(iTRAQ4plex)                                  | 1583.81792 | 85 | 76  | 4.03 | Expt1 |       |
| TLELQGLINDLQR                       | 36  | 82950147;149264086                                                                                                                                                                 | N-Term(iTRAQ4plex)                                                                   | 1656.94260 | 85 | 84  | 5.53 | Expt1 |       |
| DASSYLMMEHVSGALSDLFGEAPAAPQPSMSSEER | 5   | 7305121                                                                                                                                                                            | N-Term(iTRAQ4plex)                                                                   | 3928.78708 | 85 | 67  | 6.15 | Expt1 |       |
| TTPSYVAFTDTER                       | 59  | 124339838;50345978;124339829;124339826;31981690                                                                                                                                    | N-Term(iTRAQ4plex)                                                                   | 1631.80510 | 85 | 75  | 5.26 | Expt1 |       |
| ALLATASQCQPAGNK                     | 11  | 157951604                                                                                                                                                                          | N-Term(iTRAQ4plex), C9(Methylthio), K16(iTRAQ4plex)                                  | 1935.00273 | 85 | 110 | 6.25 | Expt1 |       |
| FTDEEVDLYR                          | 37  | 21728376;71037403                                                                                                                                                                  | N-Term(iTRAQ4plex)                                                                   | 1559.73747 | 85 | 70  | 4.47 | Expt1 |       |
| DICNDVLSLEK                         | 23  | 149269348;6756041                                                                                                                                                                  | N-Term(iTRAQ4plex), C3(Methylthio), N4(Deamidated), K12(iTRAQ4plex)                  | 1696.87822 | 85 | 94  | 5.46 | Expt1 |       |
| LFIGGLSFETDDSLR                     | 39  | 82801284;94371439;149252089;82918363;82918359;82954743;149266199;82954739;149266543;149266545;82956957;51769129;149266569;82957137;94400765;149268214;149268216;37674277;157277969 | N-Term(iTRAQ4plex)                                                                   | 1914.99321 | 85 | 91  | 5.42 | Expt1 |       |
| SVPADIFQMATTR                       | 37  | 6753824                                                                                                                                                                            | N-Term(iTRAQ4plex)                                                                   | 1708.88347 | 85 | 88  | 4.64 | Expt1 |       |
| SQEQLAAELAEYTAK                     | 22  | 149266483                                                                                                                                                                          | N-Term(iTRAQ4plex), K15(iTRAQ4plex)                                                  | 1940.02622 | 85 | 62  | 6.79 | Expt1 |       |
| IYAMEISDNPGDHGELGPEFR               | 10  | 160707889                                                                                                                                                                          | N-Term(iTRAQ4plex)                                                                   | 2563.18869 | 85 | 49  | 5.43 | Expt1 |       |
| DMAGLYEEIWK                         | 12  | 33469047                                                                                                                                                                           | N-Term(iTRAQ4plex), K11(iTRAQ4plex)                                                  | 1642.84429 | 85 | 75  | 5.03 | Expt1 |       |
| LGEYGFQNAILVR                       | 114 | 163310765                                                                                                                                                                          | N-Term(iTRAQ4plex)                                                                   | 1623.90105 | 85 | 72  | 1.18 | 5.56  | Expt1 |
| GILFVGSVSGGEEGAR                    | 39  | 124486895                                                                                                                                                                          | N-Term(iTRAQ4plex)                                                                   | 1735.91301 | 85 | 101 | 5.78 | Expt1 |       |
| AGLESTLAETECR                       | 38  | 6754480                                                                                                                                                                            | N-Term(iTRAQ4plex), C12(Methylthio)                                                  | 1569.73772 | 85 | 81  | 5.55 | Expt1 |       |
| QGVEADINGLR                         | 31  | 226823220                                                                                                                                                                          | N-Term(iTRAQ4plex), N8(Deamidated)                                                   | 1316.69280 | 85 | 73  | 4.10 | Expt1 |       |
| GLIPLTISLLDK                        | 5   | 156938252                                                                                                                                                                          | N-Term(iTRAQ4plex), K12(iTRAQ4plex)                                                  | 1571.00835 | 85 | 89  | 3.63 | Expt1 |       |
| TTAENEFVMLK                         | 100 | 20911031                                                                                                                                                                           | N-Term(iTRAQ4plex), M9(Oxidation), K11(iTRAQ4plex)                                   | 1586.83818 | 85 | 73  | 5.09 | Expt1 |       |
| VVLAYEPVWAIGTGK                     | 30  | 226958349                                                                                                                                                                          | N-Term(iTRAQ4plex), K15(iTRAQ4plex)                                                  | 1891.09880 | 85 | 94  | 4.89 | Expt1 |       |
| ADSLADEINFLR                        | 63  | 113195684                                                                                                                                                                          | N-Term(iTRAQ4plex)                                                                   | 1507.79228 | 85 | 80  | 5.04 | Expt1 |       |
| VVIEDGVGDAVLTR                      | 12  | 126518317                                                                                                                                                                          | N-Term(iTRAQ4plex)                                                                   | 1586.89153 | 85 | 79  | 4.79 | Expt1 |       |

|                             |    |                                                                                                                                                                                                                                                                                                                                                             |                                                                                                      |            |    |     |      |      |       |
|-----------------------------|----|-------------------------------------------------------------------------------------------------------------------------------------------------------------------------------------------------------------------------------------------------------------------------------------------------------------------------------------------------------------|------------------------------------------------------------------------------------------------------|------------|----|-----|------|------|-------|
| TLPGWNTDISNAR               | 7  | 31560737                                                                                                                                                                                                                                                                                                                                                    | N-Term(iTRAQ4plex)                                                                                   | 1588.82170 | 85 | 89  |      | 3.88 | Expt1 |
| ALYQTEAFTADFQQPTEAK         | 16 | 148747546                                                                                                                                                                                                                                                                                                                                                   | N-Term(iTRAQ4plex), K19(iTRAQ4plex)                                                                  | 2447.24541 | 85 | 112 |      | 7.74 | Expt1 |
| ESYPFLPTVIDGVVLPK           | 24 | 117553604                                                                                                                                                                                                                                                                                                                                                   | N-Term(iTRAQ4plex), K17(iTRAQ4plex)                                                                  | 2162.24137 | 85 | 71  |      | 6.00 | Expt1 |
| GAEAAANTGPGGVPVQGSK         | 3  | 149252935;113205059                                                                                                                                                                                                                                                                                                                                         | N-Term(iTRAQ4plex), K19(iTRAQ4plex)                                                                  | 1984.07121 | 85 | 81  |      | 6.03 | Expt1 |
| NQQEGVCPEGSIDNSPVK          | 10 | 20330802                                                                                                                                                                                                                                                                                                                                                    | N-Term(iTRAQ4plex), C7(Methylthio), K18(iTRAQ4plex)                                                  | 2235.06369 | 85 | 47  |      | 4.63 | Expt1 |
| GAAQNIIPASTGAAK             | 24 | 149248895;149249564;149249566;149251040;149251044;149251140;149251463;149251509;149251903;149251905;149251911;149251964;149251966;149252413;149253819;149253823;149257623;149258744;149258770;149258772;149258934;149258938;149259607;149260709;149260711;94387946;149265154;149265922;149266302;149266427;149266431;149268472;82996390;149273204;149275059 | N-Term(iTRAQ4plex), K15(iTRAQ4plex)                                                                  | 1657.94658 | 84 | 104 |      | 5.27 | Expt1 |
| VGQPGAAGPVSPMCPGR           | 7  | 7304875                                                                                                                                                                                                                                                                                                                                                     | N-Term(iTRAQ4plex), C14(Methylthio)                                                                  | 1770.86089 | 84 | 74  |      | 5.08 | Expt1 |
| ALEESNYELEGK                | 6  | 112983636                                                                                                                                                                                                                                                                                                                                                   | N-Term(iTRAQ4plex), K12(iTRAQ4plex)                                                                  | 1669.85173 | 84 | 93  |      | 5.23 | Expt1 |
| GFGFVDFNSEEDAK              | 5  | 84875537                                                                                                                                                                                                                                                                                                                                                    | N-Term(iTRAQ4plex), K14(iTRAQ4plex)                                                                  | 1849.88823 | 84 | 84  |      | 4.59 | Expt1 |
| VVLAADLGTEAGVQR             | 7  | 160333789                                                                                                                                                                                                                                                                                                                                                   | N-Term(iTRAQ4plex)                                                                                   | 1713.96282 | 84 | 81  |      | 4.83 | Expt1 |
| LDLIAQQMMPEVR               | 9  | 45504359                                                                                                                                                                                                                                                                                                                                                    | N-Term(iTRAQ4plex)                                                                                   | 1687.90740 | 84 | 77  |      | 4.98 | Expt1 |
| MFVLDEADEMLSR               | 32 | 176865892;21450625;176866061;149270417;226823309;176865998                                                                                                                                                                                                                                                                                                  | N-Term(iTRAQ4plex)                                                                                   | 1699.82012 | 84 | 75  |      | 4.11 | Expt1 |
| TVDNFVALATGEK               | 11 | 71774133                                                                                                                                                                                                                                                                                                                                                    | N-Term(iTRAQ4plex), K13(iTRAQ4plex)                                                                  | 1652.91765 | 84 | 93  |      | 5.61 | Expt1 |
| QLLQANPILEAFGNAK            | 30 | 29336026;114326446;241982716;241982718                                                                                                                                                                                                                                                                                                                      | N-Term(iTRAQ4plex), K16(iTRAQ4plex)                                                                  | 2015.15618 | 84 | 88  |      | 6.70 | Expt1 |
| VPPAINQFTQALDR              | 25 | 149250878;82801057;82904025;149257810;149258982;149260113;94386298;82930638;82953577;63663484;82956648;149268884                                                                                                                                                                                                                                            | N-Term(iTRAQ4plex)                                                                                   | 1713.94206 | 84 | 83  |      | 4.32 | Expt1 |
| CAVVDVPPFGAK                | 7  | 6680027                                                                                                                                                                                                                                                                                                                                                     | N-Term(iTRAQ4plex), C1(Methylthio), K12(iTRAQ4plex)                                                  | 1496.78264 | 84 | 63  |      | 4.14 | Expt1 |
| FLVGPDPGIVMR                | 9  | 171543846;145275179;15011841                                                                                                                                                                                                                                                                                                                                | N-Term(iTRAQ4plex)                                                                                   | 1444.81426 | 84 | 66  |      | 3.71 | Expt1 |
| SYYYAISDFAVGGR              | 6  | 153791270                                                                                                                                                                                                                                                                                                                                                   | N-Term(iTRAQ4plex)                                                                                   | 1712.84087 | 84 | 84  |      | 4.29 | Expt1 |
| ELEEQLGPVAAETR              | 11 | 163644329                                                                                                                                                                                                                                                                                                                                                   | N-Term(iTRAQ4plex)                                                                                   | 1743.89055 | 84 | 78  |      | 4.82 | Expt1 |
| AATQELALLISR                | 35 | 111185907                                                                                                                                                                                                                                                                                                                                                   | N-Term(iTRAQ4plex)                                                                                   | 1429.85271 | 84 | 85  |      | 4.79 | Expt1 |
| TSIDAYDNFDNISLAQR           | 39 | 51491845                                                                                                                                                                                                                                                                                                                                                    | N-Term(iTRAQ4plex)                                                                                   | 2087.02031 | 84 | 107 | 1.29 | 6.10 | Expt1 |
| GGYFDEFGIIR                 | 10 | 227330582;6996917                                                                                                                                                                                                                                                                                                                                           | N-Term(iTRAQ4plex)                                                                                   | 1417.72734 | 84 | 55  |      | 4.39 | Expt1 |
| GPILPPESFVLYR               | 35 | 125490382                                                                                                                                                                                                                                                                                                                                                   | N-Term(iTRAQ4plex)                                                                                   | 1730.99668 | 84 | 64  |      | 5.11 | Expt1 |
| GEGPEVDVSLPK                | 12 | 61743961                                                                                                                                                                                                                                                                                                                                                    | N-Term(iTRAQ4plex), K12(iTRAQ4plex)                                                                  | 1514.83330 | 84 | 60  |      | 4.28 | Expt1 |
| LEQSNVPEGPGSGTGEDESSGPR     | 9  | 55926127                                                                                                                                                                                                                                                                                                                                                    | N-Term(iTRAQ4plex)                                                                                   | 2301.07431 | 84 | 67  |      | 5.28 | Expt1 |
| VLNNMEIGTSLYDEEGAK          | 8  | 70778976                                                                                                                                                                                                                                                                                                                                                    | N-Term(iTRAQ4plex), K18(iTRAQ4plex)                                                                  | 2271.14774 | 84 | 67  |      | 5.85 | Expt1 |
| GVSFYEVPPHFAVADTVYR         | 5  | 149262184;124494242;124494244                                                                                                                                                                                                                                                                                                                               | N-Term(iTRAQ4plex)                                                                                   | 2411.25693 | 84 | 55  |      | 4.95 | Expt1 |
| MPPYDEETQAIDAAQEAR          | 9  | 6679465                                                                                                                                                                                                                                                                                                                                                     | N-Term(iTRAQ4plex)                                                                                   | 2292.10270 | 84 | 75  |      | 5.50 | Expt1 |
| VDFPQDQLATLTGR              | 22 | 31982186                                                                                                                                                                                                                                                                                                                                                    | N-Term(iTRAQ4plex)                                                                                   | 1704.90764 | 84 | 87  |      | 4.30 | Expt1 |
| VDINAPEVEVQGK               | 6  | 61743961                                                                                                                                                                                                                                                                                                                                                    | N-Term(iTRAQ4plex), K13(iTRAQ4plex)                                                                  | 1685.93498 | 84 | 83  |      | 5.28 | Expt1 |
| ISENMIPVVAEK                | 14 | 117553604                                                                                                                                                                                                                                                                                                                                                   | N-Term(iTRAQ4plex), K12(iTRAQ4plex)                                                                  | 1617.92034 | 84 | 70  |      | 4.60 | Expt1 |
| LFYLALPPTVYEAATK            | 15 | 6996917                                                                                                                                                                                                                                                                                                                                                     | N-Term(iTRAQ4plex), K16(iTRAQ4plex)                                                                  | 2113.22477 | 84 | 56  |      | 4.78 | Expt1 |
| AFGAPGEAFSEPEILFANSMGK      | 29 | 130502130                                                                                                                                                                                                                                                                                                                                                   | N-Term(iTRAQ4plex), M21(Oxidation), K23(iTRAQ4plex)                                                  | 2703.33139 | 84 | 70  |      | 6.19 | Expt1 |
| EELSNVLAAMR                 | 13 | 149262233;149249185;149255394;82922589;94385943;51827816;149262863                                                                                                                                                                                                                                                                                          | N-Term(iTRAQ4plex)                                                                                   | 1376.73577 | 84 | 64  |      | 4.25 | Expt1 |
| EGECCAFCPPEEYVSPNSEDVGVGEPK | 20 | 34328108                                                                                                                                                                                                                                                                                                                                                    | N-Term(iTRAQ4plex), C4(Methylthio), C5(Methylthio), C8(Methylthio), N16(Deamidated), K26(iTRAQ4plex) | 3201.27866 | 84 | 61  |      | 6.39 | Expt1 |



|                                  |     |                                                                                                           |                                                      |            |    |     |      |      |       |
|----------------------------------|-----|-----------------------------------------------------------------------------------------------------------|------------------------------------------------------|------------|----|-----|------|------|-------|
| MIQALELDPNLYR                    | 15  | 29336026                                                                                                  | N-Term(iTRAQ4plex)                                   | 1719.92668 | 84 | 53  |      | 4.20 | Expt1 |
| AVTGYTDPYTGDISLRFQAMQR           | 8   | 37537522                                                                                                  | N-Term(iTRAQ4plex)                                   | 2606.27652 | 84 | 89  |      | 6.36 | Expt1 |
| FGFPEGSVELYAEK                   | 15  | 6755372                                                                                                   | N-Term(iTRAQ4plex), K14(iTRAQ4plex)                  | 1860.97490 | 84 | 84  |      | 4.43 | Expt1 |
| TVAGGAWTYNTTSAVTVK               | 14  | 94367375                                                                                                  | N-Term(iTRAQ4plex), K18(iTRAQ4plex)                  | 2115.13310 | 84 | 116 | 1.23 | 5.96 | Expt1 |
| SPNQNVQQAAGALR                   | 24  | 9790161                                                                                                   | N-Term(iTRAQ4plex)                                   | 1668.89141 | 83 | 90  |      | 5.51 | Expt1 |
| LSFLYLHDHNDLESVPPNLPESLR         | 51  | 6679166                                                                                                   | N-Term(iTRAQ4plex)                                   | 2812.47306 | 83 | 62  |      | 5.96 | Expt1 |
| AGAIAPCEVTPVAQNTGLGPEK           | 19  | 9438372;6671569                                                                                           | N-Term(iTRAQ4plex), C7(Methylthio), K22(iTRAQ4plex)  | 2457.27178 | 83 | 96  |      | 5.92 | Expt1 |
| MGESDDSLIR                       | 15  | 94400159;21536222                                                                                         | N-Term(iTRAQ4plex)                                   | 1266.61077 | 83 | 65  |      | 3.65 | Expt1 |
| AYTEVAAAEEQQLR                   | 20  | 111185907                                                                                                 | N-Term(iTRAQ4plex)                                   | 1721.89519 | 83 | 74  |      | 5.33 | Expt1 |
| LALDVEIATYR                      | 114 | 29789317;85701680;20911031;<br>133778953;54607171;1131956<br>84                                           | N-Term(iTRAQ4plex)                                   | 1407.79851 | 83 | 66  |      | 4.35 | Expt1 |
| VTPPEGYDVVTVFRE                  | 33  | 158635992                                                                                                 | N-Term(iTRAQ4plex)                                   | 1851.96526 | 83 | 67  |      | 4.98 | Expt1 |
| GDEELDSLK                        | 8   | 7949045;94378041;256773209                                                                                | N-Term(iTRAQ4plex), K10(iTRAQ4plex)                  | 1406.76531 | 83 | 65  |      | 4.76 | Expt1 |
| IPDEEDQEDPYLNDR                  | 8   | 168693628                                                                                                 | N-Term(iTRAQ4plex)                                   | 1991.89665 | 83 | 84  |      | 4.44 | Expt1 |
| SSASPTGNVLLSPLSVATALSALSLGAEHR   | 11  | 117606335                                                                                                 | N-Term(iTRAQ4plex)                                   | 3050.66617 | 83 | 101 |      | 7.92 | Expt1 |
| LVQEVTFDAK                       | 60  | 163310765                                                                                                 | N-Term(iTRAQ4plex), K10(iTRAQ4plex)                  | 1437.82536 | 83 | 82  |      | 4.70 | Expt1 |
| EVMIVGVGEEK                      | 3   | 163838641;163838648                                                                                       | N-Term(iTRAQ4plex), K10(iTRAQ4plex)                  | 1348.78252 | 83 | 51  |      | 4.07 | Expt1 |
| FTQVTANSFK                       | 7   | 111074529                                                                                                 | N-Term(iTRAQ4plex), N7(Deamidated), K10(iTRAQ4plex)  | 1431.77361 | 83 | 92  |      | 3.89 | Expt1 |
| ESALSPGEDVQR                     | 28  | 125490382                                                                                                 | N-Term(iTRAQ4plex)                                   | 1431.72234 | 83 | 71  |      | 4.38 | Expt1 |
| TAVVVGTVTDDVR                    | 50  | 83699424                                                                                                  | N-Term(iTRAQ4plex)                                   | 1475.82048 | 83 | 86  |      | 4.65 | Expt1 |
| GLGTDEDAIIGILAYR                 | 18  | 161016799                                                                                                 | N-Term(iTRAQ4plex)                                   | 1820.99321 | 83 | 95  |      | 5.57 | Expt1 |
| EFSITDVVPYPISLR                  | 13  | 112293266                                                                                                 | N-Term(iTRAQ4plex)                                   | 1880.03411 | 83 | 92  |      | 4.91 | Expt1 |
| YDALEVFAAGSGTSGQR                | 37  | 125490382                                                                                                 | N-Term(iTRAQ4plex)                                   | 1801.88469 | 83 | 85  |      | 5.95 | Expt1 |
| LLMMAGIDDCYTSAR                  | 13  | 149253083;82898647;1492553<br>35;82902507;94383782;943837<br>84;149259263;63594466;14926<br>5803;94404463 | N-Term(iTRAQ4plex), C10(Methylthio)                  | 1849.84770 | 83 | 82  | 1.20 | 4.83 | Expt1 |
| FSSETWQNLGTLQR                   | 6   | 171460960                                                                                                 | N-Term(iTRAQ4plex)                                   | 1810.92900 | 83 | 82  |      | 5.11 | Expt1 |
| WIDTTSGIYNSDK                    | 3   | 157311641                                                                                                 | N-Term(iTRAQ4plex), K13(iTRAQ4plex)                  | 1787.90959 | 83 | 81  |      | 4.41 | Expt1 |
| SIQFVDWCPTGFK                    | 39  | 34740335;6678467;51765047;8<br>2930560                                                                    | N-Term(iTRAQ4plex), C8(Methylthio), K13(iTRAQ4plex)  | 1861.92851 | 83 | 72  |      | 4.28 | Expt1 |
| DYAAYNVLDDPELR                   | 3   | 21312153                                                                                                  | N-Term(iTRAQ4plex)                                   | 1797.87895 | 83 | 67  |      | 4.94 | Expt1 |
| DLTADTEYQISVFAMK                 | 45  | 111074529                                                                                                 | N-Term(iTRAQ4plex), K16(iTRAQ4plex)                  | 2120.08696 | 83 | 116 | 1.35 | 6.21 | Expt1 |
| VSGISMDVAVPENTGQDSAR             | 16  | 183979966                                                                                                 | N-Term(iTRAQ4plex)                                   | 2177.05791 | 83 | 83  |      | 5.22 | Expt1 |
| FLDGNELTLADCNLLPK                | 5   | 15617203                                                                                                  | N-Term(iTRAQ4plex), C12(Methylthio), K17(iTRAQ4plex) | 2210.14615 | 83 | 68  |      | 5.71 | Expt1 |
| NVTELNEPLSNEER                   | 35  | 31543976                                                                                                  | N-Term(iTRAQ4plex)                                   | 1787.89104 | 83 | 84  |      | 4.53 | Expt1 |
| WVIGDENYGEQSSR                   | 15  | 18079339                                                                                                  | N-Term(iTRAQ4plex)                                   | 1811.86821 | 83 | 75  |      | 4.56 | Expt1 |
| FPLTTESAMK                       | 13  | 149265809;149233872;829158<br>63;82905418;94388464;943885<br>02;94388507;149265307;14926<br>6479          | N-Term(iTRAQ4plex), K10(iTRAQ4plex)                  | 1412.77641 | 83 | 65  |      | 3.72 | Expt1 |
| LPQVSPADSGDYVCR                  | 9   | 149253040;183979966                                                                                       | N-Term(iTRAQ4plex), C14(Methylthio)                  | 1796.84551 | 83 | 76  |      | 3.86 | Expt1 |
| GDEGPPGPEGLR                     | 41  | 6753484                                                                                                   | N-Term(iTRAQ4plex)                                   | 1324.66106 | 83 | 68  |      | 4.10 | Expt1 |
| LQPFATEADVVEALR                  | 4   | 112293273                                                                                                 | N-Term(iTRAQ4plex)                                   | 1832.95549 | 83 | 73  |      | 3.93 | Expt1 |
| QTVEADINGLR                      | 146 | 118130981                                                                                                 | N-Term(iTRAQ4plex), N8(Deamidated)                   | 1360.71831 | 83 | 80  |      | 4.32 | Expt1 |
| DLVSSLTSGLLTIGDR                 | 11  | 29293809                                                                                                  | N-Term(iTRAQ4plex)                                   | 1791.00139 | 83 | 109 |      | 5.19 | Expt1 |
| QSLEASLAETEGR                    | 37  | 112983636                                                                                                 | N-Term(iTRAQ4plex)                                   | 1534.78203 | 83 | 81  |      | 4.91 | Expt1 |
| IYVDDGLISLQVK                    | 29  | 31981562                                                                                                  | N-Term(iTRAQ4plex), K13(iTRAQ4plex)                  | 1751.02385 | 83 | 97  |      | 4.76 | Expt1 |
| EAQAGLAEAQEDLEAER                | 16  | 29336026                                                                                                  | N-Term(iTRAQ4plex)                                   | 1973.95342 | 83 | 101 |      | 6.38 | Expt1 |
| ALIAGGGAPEIELALR                 | 34  | 6753322                                                                                                   | N-Term(iTRAQ4plex)                                   | 1694.99590 | 83 | 104 |      | 5.20 | Expt1 |
| MYDSVLALPGALQATR                 | 9   | 8393144                                                                                                   | N-Term(iTRAQ4plex), M1(Oxidation)                    | 1865.99968 | 83 | 59  |      | 4.22 | Expt1 |
| DEAAAAAGGEGAAAPGEQAGGAGAEGAAGEPR | 10  | 6678768                                                                                                   | N-Term(iTRAQ4plex)                                   | 2895.32389 | 83 | 105 |      | 6.48 | Expt1 |
| GISQEQMQEFR                      | 47  | 11230802                                                                                                  | N-Term(iTRAQ4plex)                                   | 1496.72954 | 83 | 64  |      | 4.79 | Expt1 |
| GDLDAAGPNLEGDFK                  | 8   | 61743961                                                                                                  | N-Term(iTRAQ4plex), K15(iTRAQ4plex)                  | 1806.91594 | 83 | 78  |      | 5.58 | Expt1 |
| AAFDDAIAELDTLSEESYK              | 9   | 226874906                                                                                                 | N-Term(iTRAQ4plex), K19(iTRAQ4plex)                  | 2376.17960 | 82 | 79  |      | 7.78 | Expt1 |
| YSDMIVAIAQAEK                    | 8   | 31560697                                                                                                  | N-Term(iTRAQ4plex), K13(iTRAQ4plex)                  | 1726.93467 | 82 | 66  |      | 4.07 | Expt1 |

|                                  |     |                                                          |                                                                     |            |    |     |      |      |       |
|----------------------------------|-----|----------------------------------------------------------|---------------------------------------------------------------------|------------|----|-----|------|------|-------|
| QAQIEVVPSASALIHK                 | 22  | 149233723;149251813;83028352;94390243;94407735;160333553 | N-Term(iTRAQ4plex), K16(iTRAQ4plex)                                 | 1955.18515 | 82 | 66  |      | 5.05 | Expt1 |
| VDILENQAMDTR                     | 11  | 82996105;149269937;6680121                               | N-Term(iTRAQ4plex)                                                  | 1548.77934 | 82 | 61  |      | 4.10 | Expt1 |
| VDIEGPNVNIPEGPK                  | 6   | 61743961                                                 | N-Term(iTRAQ4plex), K16(iTRAQ4plex)                                 | 1955.03325 | 82 | 109 |      | 6.27 | Expt1 |
| GLTSEPTSVMEK                     | 16  | 111074529                                                | N-Term(iTRAQ4plex), M11(Oxidation), K13(iTRAQ4plex)                 | 1669.85771 | 82 | 62  |      | 5.87 | Expt1 |
| GSGSSAMCGGAGFGSR                 | 21  | 54607171;113195684                                       | N-Term(iTRAQ4plex), M8(Oxidation), C9(Methylthio)                   | 1651.67449 | 82 | 86  |      | 5.03 | Expt1 |
| LTELEALQK                        | 94  | 20911031                                                 | N-Term(iTRAQ4plex), K10(iTRAQ4plex)                                 | 1461.84648 | 82 | 66  |      | 5.20 | Expt1 |
| GPSVDVEVPDVLCEPDAK               | 17  | 61743961                                                 | N-Term(iTRAQ4plex), C15(Methylthio), K19(iTRAQ4plex)                | 2318.11704 | 82 | 69  |      | 5.56 | Expt1 |
| NMNCIEMGGNPLENSGFEPGAFDGLK       | 65  | 20137008                                                 | N-Term(iTRAQ4plex), C4(Methylthio), K26(iTRAQ4plex)                 | 3075.39914 | 82 | 93  |      | 6.74 | Expt1 |
| EPPDAPDSAGGAESGPR                | 5   | 169646258                                                | N-Term(iTRAQ4plex)                                                  | 1753.81218 | 82 | 67  |      | 3.47 | Expt1 |
| EAAENSLVAYK                      | 9   | 226874906                                                | N-Term(iTRAQ4plex), K11(iTRAQ4plex)                                 | 1482.80803 | 82 | 83  |      | 5.52 | Expt1 |
| IQYQLVDISQDNALR                  | 18  | 18017602                                                 | N-Term(iTRAQ4plex)                                                  | 1920.03215 | 82 | 84  |      | 5.44 | Expt1 |
| ILENGEEAPGLGPSLDR                | 3   | 158937304                                                | N-Term(iTRAQ4plex), N4(Deamidated)                                  | 1911.97954 | 82 | 78  |      | 4.46 | Expt1 |
| TQGPYDVVVLPGNGLGAQNLSESPMVK      | 15  | 55741460                                                 | N-Term(iTRAQ4plex), K27(iTRAQ4plex)                                 | 3058.61423 | 82 | 57  |      | 6.39 | Expt1 |
| ELAPYDENWFYTR                    | 16  | 149249753;94397093;82996042;82996939;12963511            | N-Term(iTRAQ4plex)                                                  | 1847.87663 | 82 | 76  |      | 4.99 | Expt1 |
| VEADVAPPQVQGDLEK                 | 21  | 149263538;149263685                                      | N-Term(iTRAQ4plex), K15(iTRAQ4plex)                                 | 1854.02397 | 82 | 75  |      | 4.35 | Expt1 |
| GMSLNLPEPDNVGVVFGNDK             | 8   | 6680748                                                  | N-Term(iTRAQ4plex), K20(iTRAQ4plex)                                 | 2392.24985 | 82 | 60  |      | 5.64 | Expt1 |
| LCYVALDFEQEMATASSSSLEK           | 7   | 6671509;6752954                                          | N-Term(iTRAQ4plex), C2(Methylthio), M12(Oxidation), K23(iTRAQ4plex) | 2843.33768 | 82 | 87  |      | 5.17 | Expt1 |
| EPVAETDIMATNGVVYVAINTVLQPANRPQER | 10  | 6678321                                                  | N-Term(iTRAQ4plex), M9(Oxidation), N12(Deamidated)                  | 3654.86416 | 82 | 55  |      | 4.76 | Expt1 |
| VPWDFPPDITLLDLQNNK               | 137 | 6681143                                                  | N-Term(iTRAQ4plex), K18(iTRAQ4plex)                                 | 2401.27713 | 82 | 74  |      | 7.87 | Expt1 |
| TQTAIAEEDMPNLTAEAK               | 8   | 117938332;117938334                                      | N-Term(iTRAQ4plex), K19(iTRAQ4plex)                                 | 2338.17588 | 82 | 66  |      | 5.27 | Expt1 |
| VEVTEFDIK                        | 7   | 56606037;149256951;149260101;149260103                   | N-Term(iTRAQ4plex), K10(iTRAQ4plex)                                 | 1496.81450 | 82 | 76  |      | 4.68 | Expt1 |
| NTNDANSCQIHPQNVNR                | 12  | 116089273;33859560                                       | N-Term(iTRAQ4plex), C8(Methylthio)                                  | 2332.12651 | 82 | 91  |      | 5.68 | Expt1 |
| LVQAFQFTDK                       | 11  | 94400195;149267887;6754976                               | N-Term(iTRAQ4plex), K10(iTRAQ4plex)                                 | 1484.84746 | 82 | 70  |      | 4.46 | Expt1 |
| LVQSPNSYFMDVK                    | 14  | 13385958;149260404;149261975                             | N-Term(iTRAQ4plex), K13(iTRAQ4plex)                                 | 1815.95940 | 82 | 107 |      | 4.31 | Expt1 |
| SAIQLEEEYENLLK                   | 15  | 82950147;82950149;149264086                              | N-Term(iTRAQ4plex), K15(iTRAQ4plex)                                 | 2130.12016 | 82 | 93  | 1.43 | 7.22 | Expt1 |
| IQELEDMLAK                       | 4   | 188219589                                                | N-Term(iTRAQ4plex), K10(iTRAQ4plex)                                 | 1477.82414 | 82 | 76  |      | 4.59 | Expt1 |
| IQAIIELEDLLR                     | 176 | 20137008                                                 | N-Term(iTRAQ4plex)                                                  | 1456.85246 | 82 | 68  |      | 4.80 | Expt1 |
| DVQMLQDAISK                      | 3   | 7949018                                                  | N-Term(iTRAQ4plex), K11(iTRAQ4plex)                                 | 1535.84111 | 82 | 85  |      | 4.86 | Expt1 |
| SSLQTMESDVYTEVR                  | 12  | 62526118                                                 | N-Term(iTRAQ4plex)                                                  | 1888.90813 | 82 | 98  |      | 4.94 | Expt1 |
| EAPFTHFDPSCLFPACR                | 3   | 31982861                                                 | N-Term(iTRAQ4plex), C11(Methylthio), C16(Methylthio)                | 2173.95023 | 82 | 43  |      | 4.97 | Expt1 |
| TALVANTSMPVAAR                   | 6   | 31560731                                                 | N-Term(iTRAQ4plex)                                                  | 1659.90154 | 82 | 98  |      | 4.32 | Expt1 |
| FVFGTTPEDILR                     | 3   | 149249577;47059073                                       | N-Term(iTRAQ4plex)                                                  | 1538.83855 | 81 | 47  |      | 4.16 | Expt1 |
| NMQDLVEDYK                       | 81  | 20911031                                                 | N-Term(iTRAQ4plex), K10(iTRAQ4plex)                                 | 1542.77703 | 81 | 75  |      | 4.70 | Expt1 |
| GPQISAPSMDFNLEGPK                | 6   | 61743961                                                 | N-Term(iTRAQ4plex), K17(iTRAQ4plex)                                 | 2076.07285 | 81 | 61  |      | 5.54 | Expt1 |
| ISMQDVDSLGSCK                    | 10  | 61743961                                                 | N-Term(iTRAQ4plex), C13(Methylthio), K14(iTRAQ4plex)                | 1829.90996 | 81 | 115 |      | 5.31 | Expt1 |
| FNADEFEDMVAEK                    | 22  | 149249582;149249685;149259021                            | N-Term(iTRAQ4plex), K13(iTRAQ4plex)                                 | 1832.85954 | 81 | 86  |      | 4.91 | Expt1 |
| SFYPEEVSSMVLTK                   | 33  | 31981690                                                 | N-Term(iTRAQ4plex), K14(iTRAQ4plex)                                 | 1904.99907 | 81 | 88  |      | 5.56 | Expt1 |
| DFLAGVAAAISK                     | 39  | 63475897;82880803;22094075                               | N-Term(iTRAQ4plex), K13(iTRAQ4plex)                                 | 1507.87261 | 81 | 98  |      | 5.02 | Expt1 |
| ITLDNAYMEK                       | 7   | 31981562                                                 | N-Term(iTRAQ4plex), K10(iTRAQ4plex)                                 | 1485.79411 | 81 | 60  |      | 4.73 | Expt1 |
| YTALNQIPSSQSSIR                  | 19  | 226423922                                                | N-Term(iTRAQ4plex)                                                  | 1922.04888 | 81 | 85  |      | 4.55 | Expt1 |
| LLLSDMWASK                       | 6   | 9790161                                                  | N-Term(iTRAQ4plex), K10(iTRAQ4plex)                                 | 1451.82549 | 81 | 72  |      | 4.61 | Expt1 |
| DISEASVFDAYVLPK                  | 20  | 149259343;83030252;83030529;94392702                     | N-Term(iTRAQ4plex), K15(iTRAQ4plex)                                 | 1942.04448 | 81 | 111 |      | 5.44 | Expt1 |
| EISLWFQPEELVEYK                  | 6   | 149262292;149274354                                      | N-Term(iTRAQ4plex), K15(iTRAQ4plex)                                 | 2198.16606 | 81 | 60  |      | 4.76 | Expt1 |
| CATSTPAFFAEK                     | 12  | 124517663                                                | N-Term(iTRAQ4plex), C1(Methylthio), K12(iTRAQ4plex)                 | 1606.78533 | 81 | 88  |      | 5.37 | Expt1 |
| ETACTTGLVQLTLFLK                 | 3   | 161016822;161016820                                      | N-Term(iTRAQ4plex), C4(Methylthio), K16(iTRAQ4plex)                 | 2060.10019 | 81 | 48  |      | 5.04 | Expt1 |
| LIVDEAINEDNSVVSLSQPK             | 9   | 225543319;94408011                                       | N-Term(iTRAQ4plex), K20(iTRAQ4plex)                                 | 2458.33481 | 81 | 72  |      | 5.58 | Expt1 |
| YAPSGFYIASGDISGK                 | 9   | 6755995                                                  | N-Term(iTRAQ4plex), K16(iTRAQ4plex)                                 | 1920.99790 | 81 | 54  |      | 5.34 | Expt1 |

|                                |     |                                                            |                                                      |            |    |     |      |      |       |
|--------------------------------|-----|------------------------------------------------------------|------------------------------------------------------|------------|----|-----|------|------|-------|
| FYTDPEAVK                      | 3   | 1826680                                                    | N-Term(iTRAQ4plex), K10(iTRAQ4plex)                  | 1456.79790 | 81 | 77  |      | 4.44 | Expt1 |
| GVDEVTIVNLTNR                  | 132 | 149260099;6996913                                          | N-Term(iTRAQ4plex)                                   | 1686.95047 | 81 | 78  |      | 6.14 | Expt1 |
| FEELNADLFR                     | 24  | 50345978;31981690                                          | N-Term(iTRAQ4plex)                                   | 1397.72136 | 81 | 64  |      | 4.03 | Expt1 |
| APQVYILPPPAEQLSR               | 50  | 149263750                                                  | N-Term(iTRAQ4plex)                                   | 1923.08415 | 81 | 64  |      | 4.33 | Expt1 |
| GSTDNLMDIER                    | 10  | 126723461                                                  | N-Term(iTRAQ4plex)                                   | 1509.70036 | 81 | 55  |      | 4.54 | Expt1 |
| SLQDLQLTNNK                    | 28  | 160333372                                                  | N-Term(iTRAQ4plex), K11(iTRAQ4plex)                  | 1561.88860 | 81 | 82  |      | 5.36 | Expt1 |
| GLTEIPPIPSR                    | 159 | 6680554                                                    | N-Term(iTRAQ4plex)                                   | 1323.77666 | 81 | 64  |      | 4.16 | Expt1 |
| DTFGEMSDGDMQEQLR               | 7   | 58037101                                                   | N-Term(iTRAQ4plex)                                   | 2002.86064 | 81 | 85  | 1.23 | 5.30 | Expt1 |
| APEVDVQGPWEVSLK                | 20  | 61743961                                                   | N-Term(iTRAQ4plex), K14(iTRAQ4plex)                  | 1842.98528 | 81 | 82  |      | 5.48 | Expt1 |
| QAFDDAIAELDTLNEDSYK            | 5   | 6756037                                                    | N-Term(iTRAQ4plex), K19(iTRAQ4plex)                  | 2446.19437 | 81 | 67  |      | 5.66 | Expt1 |
| VQDDEVGDGTTSVTLAAELLR          | 5   | 126521835                                                  | N-Term(iTRAQ4plex)                                   | 2432.27158 | 81 | 93  |      | 6.52 | Expt1 |
| TCLLNETGDPEPFQYK               | 12  | 149269782;31982332                                         | N-Term(iTRAQ4plex), C2(Methylthio), K15(iTRAQ4plex)  | 2092.00101 | 81 | 74  |      | 5.61 | Expt1 |
| DFFTTNLFK                      | 23  | 188219537                                                  | N-Term(iTRAQ4plex), K10(iTRAQ4plex)                  | 1533.86504 | 81 | 89  | 1.64 | 4.82 | Expt1 |
| DAEAWFLEK                      | 74  | 118130981                                                  | N-Term(iTRAQ4plex), K9(iTRAQ4plex)                   | 1396.73808 | 81 | 67  |      | 4.27 | Expt1 |
| GSGTSPDEGDAQDSSSAR             | 10  | 37537522                                                   | N-Term(iTRAQ4plex)                                   | 1996.84807 | 81 | 139 |      | 5.42 | Expt1 |
| NPFVLGANLNGGER                 | 73  | 160707889                                                  | N-Term(iTRAQ4plex), N10(Deamidated)                  | 1602.83928 | 81 | 73  |      | 5.64 | Expt1 |
| LSYQNDPSFGSYAVPIR              | 22  | 7305007                                                    | N-Term(iTRAQ4plex)                                   | 2058.04619 | 80 | 108 |      | 4.78 | Expt1 |
| NATNVEQSFMTMAAEIK              | 14  | 6679587                                                    | N-Term(iTRAQ4plex), K17(iTRAQ4plex)                  | 2173.09330 | 80 | 75  |      | 5.59 | Expt1 |
| LILLANGGPQGLVQIMR              | 34  | 28395018                                                   | N-Term(iTRAQ4plex), N6(Deamidated), M16(Oxidation)   | 1954.13028 | 80 | 97  |      | 6.64 | Expt1 |
| SAYDSTMETMNYAQIR               | 5   | 29293809                                                   | N-Term(iTRAQ4plex)                                   | 2024.91924 | 80 | 74  |      | 4.80 | Expt1 |
| VTWAPPSSIETNLVLR               | 12  | 46849812                                                   | N-Term(iTRAQ4plex)                                   | 2050.18540 | 80 | 90  |      | 6.06 | Expt1 |
| NPLSDPLYDCIFTVEGALTK           | 6   | 6678329                                                    | N-Term(iTRAQ4plex), C10(Methylthio), K21(iTRAQ4plex) | 2587.30661 | 80 | 85  |      | 6.23 | Expt1 |
| YYPNSGQEDADR                   | 21  | 6755781                                                    | N-Term(iTRAQ4plex)                                   | 1494.69463 | 80 | 64  |      | 3.41 | Expt1 |
| ASSILINEAPEPTTNIQIR            | 6   | 38198665                                                   | N-Term(iTRAQ4plex)                                   | 2201.19321 | 80 | 44  |      | 5.29 | Expt1 |
| AIGLVTIVISK                    | 6   | 21312316                                                   | N-Term(iTRAQ4plex), K10(iTRAQ4plex)                  | 1288.85185 | 80 | 75  |      | 4.26 | Expt1 |
| DGLLPEDTFIVGYAR                | 22  | 6996917                                                    | N-Term(iTRAQ4plex)                                   | 1809.95439 | 80 | 74  |      | 5.08 | Expt1 |
| FLIPNASQPESK                   | 48  | 149269348;6756041                                          | N-Term(iTRAQ4plex), K12(iTRAQ4plex)                  | 1618.90898 | 80 | 76  |      | 4.64 | Expt1 |
| GDQPGASGDNDDEPPPLPR            | 12  | 31980806                                                   | N-Term(iTRAQ4plex)                                   | 2192.98271 | 80 | 99  |      | 5.30 | Expt1 |
| GAQAAIVVYDITNTDTFAR            | 21  | 113866024                                                  | N-Term(iTRAQ4plex)                                   | 2170.12724 | 80 | 82  |      | 5.39 | Expt1 |
| TVIEQSWGSPK                    | 5   | 51766670;94390282;149270048;183396771                      | N-Term(iTRAQ4plex), K12(iTRAQ4plex)                  | 1632.92632 | 80 | 80  |      | 4.80 | Expt1 |
| GYELLFQPEVVR                   | 13  | 146219835;146219830;146219849;146231979                    | N-Term(iTRAQ4plex)                                   | 1593.87944 | 80 | 52  |      | 4.39 | Expt1 |
| DTGVISVLTSGLDR                 | 33  | 6753374                                                    | N-Term(iTRAQ4plex)                                   | 1576.87126 | 80 | 87  |      | 4.38 | Expt1 |
| EYATEVDVDFVR                   | 17  | 78711838;21313640;88853578                                 | N-Term(iTRAQ4plex)                                   | 1586.78325 | 80 | 69  |      | 5.06 | Expt1 |
| QLEEAEEEAQR                    | 16  | 114326446                                                  | N-Term(iTRAQ4plex)                                   | 1475.71086 | 80 | 59  |      | 4.24 | Expt1 |
| IQEGVFDINNEANGIK               | 6   | 10946940                                                   | N-Term(iTRAQ4plex), N13(Deamidated), K16(iTRAQ4plex) | 2050.07279 | 80 | 77  |      | 4.63 | Expt1 |
| AVLVLDLEPGTMDSVR               | 47  | 31981939;22165384                                          | N-Term(iTRAQ4plex)                                   | 1745.92681 | 80 | 92  |      | 4.73 | Expt1 |
| DGSVSVMDYYEPR                  | 3   | 23346525                                                   | N-Term(iTRAQ4plex)                                   | 1661.75884 | 80 | 59  |      | 4.27 | Expt1 |
| MFVLDEADEMLSR                  | 29  | 176865892;21450625;176866061;149270417;226823309;176865998 | N-Term(iTRAQ4plex), M1(Oxidation)                    | 1715.81267 | 80 | 82  |      | 3.95 | Expt1 |
| LNMEAINYMAADGDFK               | 14  | 6678682                                                    | N-Term(iTRAQ4plex), K16(iTRAQ4plex)                  | 2091.01274 | 80 | 88  |      | 4.91 | Expt1 |
| YYTSASGDEMVSJK                 | 8   | 6754254                                                    | N-Term(iTRAQ4plex), K14(iTRAQ4plex)                  | 1838.91191 | 79 | 115 |      | 5.31 | Expt1 |
| GFPTIYFSPANK                   | 22  | 112293264                                                  | N-Term(iTRAQ4plex), K12(iTRAQ4plex)                  | 1629.89433 | 79 | 83  |      | 4.53 | Expt1 |
| VTYVDFLAYDILDQYR               | 3   | 33468899;6754084                                           | N-Term(iTRAQ4plex)                                   | 2138.09946 | 79 | 54  |      | 5.23 | Expt1 |
| TMDNQIVVSDY AQMDR              | 6   | 6753322                                                    | N-Term(iTRAQ4plex)                                   | 2144.97490 | 79 | 77  |      | 4.82 | Expt1 |
| ILTVEDHYEGGIGEA VSAAVGEPGVTVTR | 50  | 6678359                                                    | N-Term(iTRAQ4plex)                                   | 3332.71543 | 79 | 80  |      | 5.22 | Expt1 |
| YQAGGLTVHDVTTTLTSLAR           | 3   | 37537522                                                   | N-Term(iTRAQ4plex)                                   | 2361.29807 | 79 | 49  |      | 5.41 | Expt1 |
| MLTYDPMLLFTGR                  | 35  | 31560625                                                   | N-Term(iTRAQ4plex)                                   | 1701.88640 | 79 | 73  |      | 4.53 | Expt1 |
| TDLEMQIESLNEELAYLK             | 3   | 6754480                                                    | N-Term(iTRAQ4plex), M5(Oxidation), K18(iTRAQ4plex)   | 2443.26175 | 79 | 73  |      | 8.15 | Expt1 |
| FAAATGATPIAGR                  | 37  | 149251929;82905443;51766344;51770420;149270876             | N-Term(iTRAQ4plex)                                   | 1347.75200 | 79 | 79  |      | 4.31 | Expt1 |
| MFFDAELSQMQTHVSDTSVVLMSMDNNR   | 12  | 20911031                                                   | N-Term(iTRAQ4plex), M1(Oxidation), M23(Oxidation)    | 3278.49746 | 79 | 49  |      | 6.67 | Expt1 |
| GDGGPPGMTGFPGAAGR              | 85  | 111120329                                                  | N-Term(iTRAQ4plex), M8(Oxidation)                    | 1661.78276 | 79 | 77  |      | 4.58 | Expt1 |
| SEAIASVDDAIR                   | 10  | 21040233                                                   | N-Term(iTRAQ4plex)                                   | 1390.72893 | 79 | 66  |      | 4.07 | Expt1 |

|                            |     |                                                                          |                                                                       |            |    |     |      |      |       |
|----------------------------|-----|--------------------------------------------------------------------------|-----------------------------------------------------------------------|------------|----|-----|------|------|-------|
| STLTDLSLVCK                | 6   | 33859482                                                                 | N-Term(iTRAQ4plex), C9(Methylthio), K10(iTRAQ4plex)                   | 1400.73772 | 79 | 73  |      | 4.32 | Expt1 |
| EAINVEQAFQTIAR             | 41  | 148747526                                                                | N-Term(iTRAQ4plex)                                                    | 1733.93523 | 79 | 89  | 1.19 | 5.99 | Expt1 |
| TAEYDVAFGER                | 121 | 6753484                                                                  | N-Term(iTRAQ4plex)                                                    | 1401.67583 | 79 | 65  |      | 5.00 | Expt1 |
| ELGEYGLQAYTEVK             | 16  | 6753036                                                                  | N-Term(iTRAQ4plex), K14(iTRAQ4plex)                                   | 1888.00102 | 79 | 86  |      | 5.49 | Expt1 |
| DATLEACAGALQNLTASK         | 22  | 9790161                                                                  | N-Term(iTRAQ4plex), C7(Methylthio), K18(iTRAQ4plex)                   | 2111.07109 | 79 | 113 |      | 6.30 | Expt1 |
| IPGGIEDSCVLR               | 13  | 6753320                                                                  | N-Term(iTRAQ4plex), C10(Methylthio)                                   | 1561.82158 | 79 | 51  |      | 3.46 | Expt1 |
| NFLDQTNVSAQAQR             | 47  | 160333923                                                                | N-Term(iTRAQ4plex)                                                    | 1791.94975 | 79 | 106 |      | 5.54 | Expt1 |
| SMAEAMQLQEELAAER           | 9   | 114326446                                                                | N-Term(iTRAQ4plex)                                                    | 2193.06937 | 79 | 79  | 1.72 | 4.88 | Expt1 |
| GEFQILLDALDK               | 21  | 31982861                                                                 | N-Term(iTRAQ4plex), K12(iTRAQ4plex)                                   | 1649.94028 | 79 | 71  |      | 4.97 | Expt1 |
| LLADPTGAFGK                | 19  | 6755114                                                                  | N-Term(iTRAQ4plex), K11(iTRAQ4plex)                                   | 1377.80095 | 79 | 73  |      | 4.07 | Expt1 |
| DQGTIEDYVEGLR              | 18  | 33620739;94363353;94383790;<br>149265610;149266035                       | N-Term(iTRAQ4plex)                                                    | 1688.79021 | 79 | 73  |      | 4.81 | Expt1 |
| YEDMAAFMK                  | 18  | 134023662                                                                | N-Term(iTRAQ4plex), K9(iTRAQ4plex)                                    | 1393.67864 | 79 | 68  |      | 3.82 | Expt1 |
| VALTGLTVAEYFR              | 45  | 31980648                                                                 | N-Term(iTRAQ4plex)                                                    | 1583.89189 | 79 | 76  |      | 5.60 | Expt1 |
| YGVSYPTLK                  | 8   | 112293264                                                                | N-Term(iTRAQ4plex), K10(iTRAQ4plex)                                   | 1372.77837 | 79 | 60  |      | 3.90 | Expt1 |
| GPAGPSGPVVK                | 17  | 111120329                                                                | N-Term(iTRAQ4plex), K11(iTRAQ4plex)                                   | 1211.69780 | 79 | 78  |      | 4.01 | Expt1 |
| SGQGPVGPAGVR               | 253 | 111120329                                                                | N-Term(iTRAQ4plex), Q3(Deamidated)                                    | 1323.71282 | 79 | 71  | 1.25 | 4.96 | Expt1 |
| QTNPSAMEVEEDDPVPEIR        | 15  | 225543319;94408011                                                       | N-Term(iTRAQ4plex)                                                    | 2300.08403 | 79 | 106 |      | 4.92 | Expt1 |
| VSALDLAVLDQVEAR            | 19  | 28076935                                                                 | N-Term(iTRAQ4plex)                                                    | 1742.98198 | 79 | 102 |      | 5.33 | Expt1 |
| LLPQVMYLDGYDR              | 35  | 40254600                                                                 | N-Term(iTRAQ4plex)                                                    | 1726.90117 | 79 | 82  |      | 4.01 | Expt1 |
| QVCEQLISGQMSR              | 35  | 111074529                                                                | N-Term(iTRAQ4plex), C3(Methylthio)                                    | 1668.80181 | 78 | 67  |      | 4.12 | Expt1 |
| LAGTQPLEVLEAVQR            | 43  | 6678483                                                                  | N-Term(iTRAQ4plex)                                                    | 1768.01311 | 78 | 90  |      | 5.62 | Expt1 |
| TQVTELEDELTAEDAK           | 9   | 29336026                                                                 | N-Term(iTRAQ4plex), K17(iTRAQ4plex)                                   | 2151.09922 | 78 | 67  |      | 4.81 | Expt1 |
| DEILPTTPISEK               | 19  | 6755372                                                                  | N-Term(iTRAQ4plex), K13(iTRAQ4plex)                                   | 1758.97832 | 78 | 89  |      | 5.34 | Expt1 |
| VEEIIQTLISQLAAK            | 16  | 70608194;70608205;70608198;<br>6678407;70608214                          | N-Term(iTRAQ4plex), K15(iTRAQ4plex)                                   | 1946.11649 | 78 | 66  |      | 5.66 | Expt1 |
| EDLTAAMLIVK                | 39  | 148277039                                                                | N-Term(iTRAQ4plex), M7(Oxidation), K11(iTRAQ4plex)                    | 1507.86675 | 78 | 64  |      | 4.47 | Expt1 |
| VVDLLAPYAK                 | 16  | 31980648                                                                 | N-Term(iTRAQ4plex), K10(iTRAQ4plex)                                   | 1376.84197 | 78 | 76  |      | 4.20 | Expt1 |
| GTFCSDPTDEAIR              | 3   | 37202121;283483966                                                       | N-Term(iTRAQ4plex), C4(Methylthio)                                    | 1748.77556 | 78 | 63  |      | 4.78 | Expt1 |
| ILLTEPPMNPVK               | 7   | 22122825                                                                 | N-Term(iTRAQ4plex), K12(iTRAQ4plex)                                   | 1641.95183 | 78 | 64  |      | 4.57 | Expt1 |
| ADDPSSYMEVVQAANASGNWEELVK  | 8   | 51491845                                                                 | N-Term(iTRAQ4plex), K25(iTRAQ4plex)                                   | 2998.43790 | 78 | 78  |      | 5.98 | Expt1 |
| GSPLAEGPQAFFPER            | 9   | 94379918;58082069                                                        | N-Term(iTRAQ4plex)                                                    | 1746.89690 | 78 | 66  |      | 4.75 | Expt1 |
| TLFSNIVLSGGSTLFK           | 11  | 8392847;22122615                                                         | N-Term(iTRAQ4plex), K16(iTRAQ4plex)                                   | 1972.14092 | 78 | 83  | 1.20 | 5.05 | Expt1 |
| NGVGNSSGLGGSVNDVFS SSR     | 47  | 82950147;82950149;14926408<br>6                                          | N-Term(iTRAQ4plex), N5(Deamidated)                                    | 2257.04375 | 78 | 128 |      | 5.93 | Expt1 |
| ISFDPDQTFESEFYLDEK         | 10  | 160333710;148747546                                                      | N-Term(iTRAQ4plex), K18(iTRAQ4plex)                                   | 2498.19097 | 78 | 111 | 1.25 | 6.79 | Expt1 |
| DLLVTGAYEITDQSGGAGGLR      | 6   | 21312062                                                                 | N-Term(iTRAQ4plex)                                                    | 2237.15934 | 78 | 93  |      | 5.29 | Expt1 |
| CPAPNLEGGPSVFIFPPNIK       | 20  | 149263750                                                                | N-Term(iTRAQ4plex), C1(Methylthio), K20(iTRAQ4plex)                   | 2431.27347 | 78 | 64  |      | 5.74 | Expt1 |
| DLASVQALLR                 | 12  | 115496850                                                                | N-Term(iTRAQ4plex)                                                    | 1229.73540 | 78 | 67  |      | 3.85 | Expt1 |
| DAVIYPILVEFTR              | 10  | 157951706                                                                | N-Term(iTRAQ4plex)                                                    | 1679.95329 | 78 | 71  |      | 4.27 | Expt1 |
| WVNDVEDSYGQQWTYEQR         | 17  | 21450277                                                                 | N-Term(iTRAQ4plex)                                                    | 2447.10137 | 78 | 90  | 1.23 | 6.06 | Expt1 |
| ALTVPELTQQMFDK             | 34  | 31981939;22165384;14925348<br>8;149253527;83030206;277540<br>56;12963615 | N-Term(iTRAQ4plex), K15(iTRAQ4plex)                                   | 1980.07781 | 78 | 94  |      | 5.47 | Expt1 |
| LDNLVAIFDINR               | 73  | 6678359                                                                  | N-Term(iTRAQ4plex)                                                    | 1546.87505 | 78 | 64  |      | 4.87 | Expt1 |
| VDALMDEINFMK               | 59  | 20911031                                                                 | N-Term(iTRAQ4plex), M5(Oxidation), M11(Oxidation),<br>K12(iTRAQ4plex) | 1745.87564 | 78 | 63  |      | 6.02 | Expt1 |
| YDGATIVPGDQGADYQHFIQCTDDVR | 15  | 19482160                                                                 | N-Term(iTRAQ4plex), C22(Methylthio)                                   | 3202.44065 | 78 | 53  |      | 4.95 | Expt1 |
| GVVPLAGTDGETTQGLDGLLER     | 10  | 60687506                                                                 | N-Term(iTRAQ4plex)                                                    | 2443.28885 | 78 | 109 |      | 6.15 | Expt1 |
| LAYINPDALALEEK             | 21  | 14389431                                                                 | N-Term(iTRAQ4plex), K13(iTRAQ4plex)                                   | 1777.00517 | 78 | 84  |      | 4.33 | Expt1 |
| ALDIAENPMGLMR              | 10  | 149267883;262263372                                                      | N-Term(iTRAQ4plex)                                                    | 1703.86308 | 78 | 70  |      | 4.98 | Expt1 |
| DTPVLSELPEVVAR             | 13  | 160707889                                                                | N-Term(iTRAQ4plex)                                                    | 1765.98674 | 78 | 94  |      | 4.00 | Expt1 |
| VVYWTDISSEPSIGR            | 12  | 171543883                                                                | N-Term(iTRAQ4plex)                                                    | 1765.92888 | 78 | 82  | 1.20 | 4.05 | Expt1 |
| CNEGIEVAFDGR               | 10  | 118197277                                                                | N-Term(iTRAQ4plex), C1(Methylthio)                                    | 1499.63494 | 78 | 62  |      | 4.11 | Expt1 |
| VLFEPLFPATDDSLYYK          | 10  | 6680846                                                                  | N-Term(iTRAQ4plex), K18(iTRAQ4plex)                                   | 2421.25833 | 78 | 57  |      | 4.96 | Expt1 |
| LFYAPTSGGPEELVPIPGNTNYAILR | 7   | 111074529                                                                | N-Term(iTRAQ4plex)                                                    | 2933.56418 | 78 | 59  |      | 5.17 | Expt1 |
| VTNGAFTGEISPGMIK           | 26  | 226958349                                                                | N-Term(iTRAQ4plex), N3(Deamidated), K16(iTRAQ4plex)                   | 1911.01518 | 78 | 93  |      | 6.09 | Expt1 |

|                          |     |                                                                                                                                         |                                                    |            |    |     |      |      |       |
|--------------------------|-----|-----------------------------------------------------------------------------------------------------------------------------------------|----------------------------------------------------|------------|----|-----|------|------|-------|
| IAWPPPAELGGSGSALEEGIK    | 3   | 158518433;165905585                                                                                                                     | N-Term(iTRAQ4plex), K21(iTRAQ4plex)                | 2367.28507 | 78 | 73  |      | 6.91 | Expt1 |
| DAALQNVSDSEK             | 3   | 112421039                                                                                                                               | N-Term(iTRAQ4plex), K12(iTRAQ4plex)                | 1564.80718 | 78 | 63  |      | 4.93 | Expt1 |
| AMGIMNSFVNDIFER          | 145 | 68131547;68226433;30061385;<br>149264032;160420312;460490<br>29;28316760;68226431;160420<br>308;30089704;30061387;13386<br>452          | N-Term(iTRAQ4plex), M2(Oxidation), M5(Oxidation)   | 1919.91179 | 77 | 80  |      | 6.21 | Expt1 |
| VAVSADPNVNVIVTR          | 17  | 31982030                                                                                                                                | N-Term(iTRAQ4plex)                                 | 1795.02422 | 77 | 84  |      | 4.58 | Expt1 |
| SEIDLNLK                 | 5   | 149265291;22165408                                                                                                                      | N-Term(iTRAQ4plex), K9(iTRAQ4plex)                 | 1332.79839 | 77 | 65  |      | 4.03 | Expt1 |
| ELQSTQAQLSEWR            | 14  | 29336026                                                                                                                                | N-Term(iTRAQ4plex)                                 | 1719.87908 | 77 | 72  |      | 4.46 | Expt1 |
| ADIVENQVMSTR             | 16  | 6754084                                                                                                                                 | N-Term(iTRAQ4plex)                                 | 1534.76323 | 77 | 72  |      | 4.44 | Expt1 |
| FQSSMSYGGGFGAGSCQLGGGR   | 10  | 6754480                                                                                                                                 | N-Term(iTRAQ4plex), C17(Methylthio)                | 2388.03057 | 77 | 157 |      | 6.20 | Expt1 |
| NTLDLIAPSPADVQHWVQGLR    | 3   | 9790167                                                                                                                                 | N-Term(iTRAQ4plex)                                 | 2474.33640 | 77 | 67  |      | 5.54 | Expt1 |
| TESSTVVTLPGEVR           | 3   | 110347564;110815853                                                                                                                     | N-Term(iTRAQ4plex)                                 | 1715.93181 | 77 | 88  |      | 4.24 | Expt1 |
| NLQPDTPYITIVVPVYTEGDGGR  | 47  | 111074529                                                                                                                               | N-Term(iTRAQ4plex)                                 | 2636.33989 | 77 | 115 |      | 5.87 | Expt1 |
| GYAVAVVK                 | 9   | 20330802                                                                                                                                | N-Term(iTRAQ4plex), K9(iTRAQ4plex)                 | 1257.75432 | 77 | 67  |      | 3.84 | Expt1 |
| AQYEAMAEQNR              | 242 | 122425580;118130981                                                                                                                     | N-Term(iTRAQ4plex)                                 | 1454.68201 | 77 | 90  |      | 5.11 | Expt1 |
| SPDFTNENPLETR            | 22  | 21450277                                                                                                                                | N-Term(iTRAQ4plex)                                 | 1663.80754 | 77 | 71  |      | 4.34 | Expt1 |
| AMGIMNSFVNDIFER          | 72  | 68131547;68226433;30061385;<br>149264032;160420312;460490<br>29;28316760;68226431;160420<br>308;30089704;30061387;13386<br>452          | N-Term(iTRAQ4plex), N6(Deamidated)                 | 1888.90911 | 77 | 105 | 1.43 | 5.96 | Expt1 |
| LITLEEEMTK               | 3   | 42415475                                                                                                                                | N-Term(iTRAQ4plex), K10(iTRAQ4plex)                | 1494.83843 | 77 | 76  |      | 4.67 | Expt1 |
| EGIESGDPGTTDGR           | 8   | 125628659                                                                                                                               | N-Term(iTRAQ4plex)                                 | 1548.69145 | 77 | 73  |      | 4.43 | Expt1 |
| VYDPSTSSLSVR             | 48  | 111074529                                                                                                                               | N-Term(iTRAQ4plex)                                 | 1454.76299 | 77 | 70  |      | 4.09 | Expt1 |
| DVDAAYMKN                | 31  | 20911031;54607171;47523977;<br>269914154                                                                                                | N-Term(iTRAQ4plex), K9(iTRAQ4plex)                 | 1314.66765 | 77 | 68  |      | 4.17 | Expt1 |
| GLPSYNYMSAPGSR           | 5   | 82950147;82950149;14926408<br>6                                                                                                         | N-Term(iTRAQ4plex)                                 | 1577.78728 | 77 | 66  |      | 4.15 | Expt1 |
| STPAITLENPDIK            | 12  | 19745150                                                                                                                                | N-Term(iTRAQ4plex), K13(iTRAQ4plex)                | 1686.95757 | 77 | 109 |      | 5.35 | Expt1 |
| ADIVFLTDASWSIGDDNFNK     | 3   | 111074529                                                                                                                               | N-Term(iTRAQ4plex), K20(iTRAQ4plex)                | 2516.25986 | 77 | 71  |      | 5.71 | Expt1 |
| QTEQTYWQATPFR            | 31  | 6755781;239915968                                                                                                                       | N-Term(iTRAQ4plex)                                 | 1799.88628 | 77 | 61  |      | 5.16 | Expt1 |
| AFLSVMASPSQLCGLR         | 35  | 148277039                                                                                                                               | N-Term(iTRAQ4plex), M6(Oxidation), C13(Methylthio) | 1885.94609 | 77 | 82  |      | 4.62 | Expt1 |
| GPQITGPSLEGDGLK          | 6   | 61743961                                                                                                                                | N-Term(iTRAQ4plex), K16(iTRAQ4plex)                | 1870.05466 | 77 | 53  |      | 4.94 | Expt1 |
| GTITAASGFDPLR            | 9   | 160707921                                                                                                                               | N-Term(iTRAQ4plex)                                 | 1449.78288 | 77 | 60  |      | 4.61 | Expt1 |
| FIQSPEDLEK               | 13  | 149259801;149260087;169808<br>401;50263046;154350202                                                                                    | N-Term(iTRAQ4plex), K10(iTRAQ4plex)                | 1493.81145 | 77 | 53  |      | 3.93 | Expt1 |
| AILSYLAAK                | 49  | 160298217                                                                                                                               | N-Term(iTRAQ4plex), K9(iTRAQ4plex)                 | 1237.78093 | 77 | 74  |      | 4.23 | Expt1 |
| SFFPEEISSMVLTK           | 46  | 124339829;124339826                                                                                                                     | N-Term(iTRAQ4plex), K14(iTRAQ4plex)                | 1903.01958 | 77 | 101 |      | 5.30 | Expt1 |
| AFYPEEISSMVLTK           | 32  | 124339838                                                                                                                               | N-Term(iTRAQ4plex), K14(iTRAQ4plex)                | 1903.02243 | 77 | 56  |      | 5.80 | Expt1 |
| TNAENEFVTIK              | 7   | 126116585                                                                                                                               | N-Term(iTRAQ4plex), K11(iTRAQ4plex)                | 1553.84172 | 77 | 69  |      | 4.80 | Expt1 |
| DMETIGFAVYQVPR           | 20  | 160333229                                                                                                                               | N-Term(iTRAQ4plex), M2(Oxidation)                  | 1785.90117 | 77 | 65  |      | 4.77 | Expt1 |
| LLLPGLAK                 | 86  | 68131547;68226433;30061385;<br>149264032;160420312;460490<br>29;28316750;28316760;682264<br>31;160420308;30089704;30061<br>387;13386452 | N-Term(iTRAQ4plex), K9(iTRAQ4plex)                 | 1241.80376 | 77 | 63  |      | 3.79 | Expt1 |
| SAGVSVPGMPGSPGPR         | 89  | 34328108                                                                                                                                | N-Term(iTRAQ4plex)                                 | 1596.82964 | 77 | 75  |      | 4.87 | Expt1 |
| IITEGFEAAK               | 3   | 6753324                                                                                                                                 | N-Term(iTRAQ4plex), K10(iTRAQ4plex)                | 1366.77947 | 77 | 78  |      | 4.10 | Expt1 |
| EIEAYGQQLR               | 17  | 111185907                                                                                                                               | N-Term(iTRAQ4plex)                                 | 1350.71514 | 77 | 47  |      | 3.87 | Expt1 |
| NFLENLVTAFNVGSEK         | 8   | 226423922                                                                                                                               | N-Term(iTRAQ4plex), K16(iTRAQ4plex)                | 2070.11431 | 77 | 91  |      | 5.44 | Expt1 |
| LDPQTLDEQQWDTPCPR        | 9   | 86439989                                                                                                                                | N-Term(iTRAQ4plex), C16(Methylthio)                | 2333.07529 | 77 | 73  |      | 6.27 | Expt1 |
| DDVSGFVDPLVLQDAQALHEAGEK | 5   | 149265291;22165408                                                                                                                      | N-Term(iTRAQ4plex), K25(iTRAQ4plex)                | 2898.47129 | 77 | 71  |      | 6.99 | Expt1 |
| FLEQQNQLVQTK             | 22  | 47059013;51092295;51092293;<br>9910294;126116585                                                                                        | N-Term(iTRAQ4plex), K12(iTRAQ4plex)                | 1763.98967 | 77 | 74  |      | 5.99 | Expt1 |
| YSVDIPLDK                | 18  | 149262383;82881899;8290722<br>3;82913824;20344851                                                                                       | N-Term(iTRAQ4plex), K9(iTRAQ4plex)                 | 1337.76128 | 77 | 66  |      | 3.92 | Expt1 |
| TLMNLGLAVAR              | 14  | 30519911                                                                                                                                | N-Term(iTRAQ4plex)                                 | 1359.79326 | 77 | 63  |      | 3.84 | Expt1 |

|                          |     |                                                             |                                                      |            |    |     |      |      |       |
|--------------------------|-----|-------------------------------------------------------------|------------------------------------------------------|------------|----|-----|------|------|-------|
| DFYNPMVASGQK             | 3   | 6753440                                                     | N-Term(iTRAQ4plex), K12(iTRAQ4plex)                  | 1644.82891 | 77 | 85  |      | 4.66 | Expt1 |
| QSVEADINGLR              | 41  | 6754480;112983636                                           | N-Term(iTRAQ4plex), N8(Deamidated)                   | 1346.70378 | 77 | 66  |      | 3.98 | Expt1 |
| GALLQMDAIDLTDK           | 8   | 165377185                                                   | N-Term(iTRAQ4plex), K14(iTRAQ4plex)                  | 1791.97905 | 77 | 85  |      | 5.12 | Expt1 |
| EAFQEALAAAGDK            | 18  | 6755911                                                     | N-Term(iTRAQ4plex), K13(iTRAQ4plex)                  | 1608.85417 | 76 | 96  |      | 6.05 | Expt1 |
| VPPLIASFVR               | 240 | 6754090                                                     | N-Term(iTRAQ4plex)                                   | 1242.77117 | 76 | 51  |      |      | Expt1 |
| YVEPIEDVPCGNIVGLVGDQFLVK | 3   | 33859482                                                    | N-Term(iTRAQ4plex), C10(Methylthio), K25(iTRAQ4plex) | 3036.61118 | 76 | 49  |      | 5.59 | Expt1 |
| CVVVGDGAVGK              | 10  | 18875380;9625037;45592934;6753364;6679601;13489097;34328361 | N-Term(iTRAQ4plex), C1(Methylthio), K11(iTRAQ4plex)  | 1337.71343 | 76 | 71  |      | 3.88 | Expt1 |
| EVDIGIPDATGR             | 30  | 225543319;94408011                                          | N-Term(iTRAQ4plex)                                   | 1386.73699 | 76 | 71  |      | 3.79 | Expt1 |
| YEVSVYALK                | 5   | 46849812                                                    | N-Term(iTRAQ4plex), K9(iTRAQ4plex)                   | 1359.77825 | 76 | 60  |      | 4.05 | Expt1 |
| EAGAGGLAIAVEGPSK         | 4   | 125347376                                                   | N-Term(iTRAQ4plex), K16(iTRAQ4plex)                  | 1714.95879 | 76 | 119 |      | 5.93 | Expt1 |
| VGDAIPSEVEFEGEPGK        | 30  | 6755114                                                     | N-Term(iTRAQ4plex), K17(iTRAQ4plex)                  | 2018.07500 | 76 | 91  |      | 4.98 | Expt1 |
| LYLTVTVPVVTFK            | 27  | 149234297;82895052;82898755;149267404                       | N-Term(iTRAQ4plex), K14(iTRAQ4plex)                  | 1933.13884 | 76 | 71  |      | 4.53 | Expt1 |
| WTELLPLIQYEVVR           | 6   | 31981748;285402638;285402659                                | N-Term(iTRAQ4plex)                                   | 2031.14444 | 76 | 82  |      | 5.55 | Expt1 |
| MIAGQVLDINLAAEPK         | 9   | 8393544;283436180;283436176;283436182                       | N-Term(iTRAQ4plex), K16(iTRAQ4plex)                  | 1971.12444 | 76 | 86  |      | 4.81 | Expt1 |
| IQGGSVVEMQGDEMTR         | 4   | 162417975                                                   | N-Term(iTRAQ4plex)                                   | 1880.89714 | 76 | 89  |      | 5.14 | Expt1 |
| GGNTLTGMALNFIR           | 45  | 111074529                                                   | N-Term(iTRAQ4plex), M8(Oxidation)                    | 1624.86272 | 76 | 83  |      | 5.33 | Expt1 |
| GEISSTQDAMMEEIFR         | 14  | 30519997                                                    | N-Term(iTRAQ4plex)                                   | 1987.92851 | 76 | 98  |      | 5.31 | Expt1 |
| TPAGLQVLNDYLADK          | 24  | 31980922                                                    | N-Term(iTRAQ4plex), K15(iTRAQ4plex)                  | 1906.05583 | 76 | 77  |      | 5.49 | Expt1 |
| ADYAQLLEDQMNAFR          | 4   | 31560731                                                    | N-Term(iTRAQ4plex)                                   | 1928.93204 | 76 | 72  |      | 4.05 | Expt1 |
| DLADELALVDVMEDK          | 18  | 6754524;257743039                                           | N-Term(iTRAQ4plex), M12(Oxidation), K15(iTRAQ4plex)  | 1980.01384 | 76 | 90  |      | 5.74 | Expt1 |
| SPYLYPLYGLGELPQGFAR      | 9   | 116089273;33859560                                          | N-Term(iTRAQ4plex)                                   | 2285.21610 | 76 | 70  | 2.10 | 6.75 | Expt1 |
| DQLIVNLLK                | 17  | 149271040;149271078;6754524;257743039                       | N-Term(iTRAQ4plex), K9(iTRAQ4plex)                   | 1343.85515 | 76 | 66  |      | 4.05 | Expt1 |
| DLTADTEYQISVFAMK         | 11  | 111074529                                                   | N-Term(iTRAQ4plex), M15(Oxidation), K16(iTRAQ4plex)  | 2136.08493 | 76 | 50  |      | 5.21 | Expt1 |
| LPAQEDTASEAGTPQGEVQTR    | 9   | 213417799;213417812                                         | N-Term(iTRAQ4plex)                                   | 2426.19284 | 76 | 87  |      | 6.38 | Expt1 |
| ISMPPIDLNLK              | 29  | 61743961                                                    | N-Term(iTRAQ4plex), K11(iTRAQ4plex)                  | 1546.88310 | 76 | 80  |      | 4.87 | Expt1 |
| ISMDDLNLNLK              | 29  | 61743961                                                    | N-Term(iTRAQ4plex), N7(Deamidated), K11(iTRAQ4plex)  | 1546.88310 | 76 | 80  |      | 4.87 | Expt1 |
| WGDIFFPPFGR              | 16  | 29293809                                                    | N-Term(iTRAQ4plex)                                   | 1561.79717 | 76 | 59  |      | 3.79 | Expt1 |
| VAAPDVVVPTLDTVR          | 12  | 134288917                                                   | N-Term(iTRAQ4plex)                                   | 1695.97917 | 76 | 82  |      | 4.36 | Expt1 |
| EEAESTLQSFRR             | 34  | 31982755                                                    | N-Term(iTRAQ4plex)                                   | 1440.70867 | 76 | 71  |      | 4.37 | Expt1 |
| LEICNLTPDALK             | 8   | 16033229                                                    | N-Term(iTRAQ4plex), C4(Methylthio), K12(iTRAQ4plex)  | 1663.90691 | 76 | 91  |      | 4.94 | Expt1 |
| ISYSSGGGSFR              | 105 | 20911031                                                    | N-Term(iTRAQ4plex)                                   | 1261.62859 | 76 | 72  |      | 5.26 | Expt1 |
| VDILDALLR                | 10  | 228008337                                                   | N-Term(iTRAQ4plex)                                   | 1268.77263 | 76 | 55  |      | 3.39 | Expt1 |
| VFIGNLNTLVK              | 9   | 8393544;283436180;283436176;283436182                       | N-Term(iTRAQ4plex), K12(iTRAQ4plex)                  | 1605.00505 | 76 | 88  |      | 5.12 | Expt1 |
| AVEHADGGVAAGVAVLDNPPYV   | 3   | 6680117                                                     | N-Term(iTRAQ4plex)                                   | 2265.16733 | 76 | 61  |      | 4.23 | Expt1 |
| EMNDAAMFYTNR             | 15  | 157951604                                                   | N-Term(iTRAQ4plex)                                   | 1606.71367 | 76 | 64  |      | 4.51 | Expt1 |
| GAEMETVIPVDVMR           | 12  | 55741460                                                    | N-Term(iTRAQ4plex), M5(Oxidation)                    | 1835.90410 | 76 | 81  |      | 3.81 | Expt1 |
| LQPQTTYDITVLPYK          | 17  | 111074529                                                   | N-Term(iTRAQ4plex), M14(Oxidation), K16(iTRAQ4plex)  | 2215.19602 | 76 | 65  |      | 5.47 | Expt1 |
| FGNPGGFGNQGGFGNSR        | 10  | 21704096                                                    | N-Term(iTRAQ4plex)                                   | 1870.87029 | 76 | 98  |      | 4.67 | Expt1 |
| QQLSAEELDAQLDAYNAR       | 9   | 6755763                                                     | N-Term(iTRAQ4plex)                                   | 2179.07865 | 76 | 70  |      | 6.53 | Expt1 |
| EYVLTQQGFIYQGSVK         | 11  | 6678329                                                     | N-Term(iTRAQ4plex), K16(iTRAQ4plex)                  | 2148.16275 | 76 | 63  |      | 6.20 | Expt1 |
| TIFAYFSGSK               | 11  | 13386060                                                    | N-Term(iTRAQ4plex), K10(iTRAQ4plex)                  | 1408.77995 | 76 | 79  |      | 3.77 | Expt1 |
| YYPLIEDLK                | 271 | 149262636;118130981                                         | N-Term(iTRAQ4plex), K9(iTRAQ4plex)                   | 1441.82524 | 76 | 79  |      | 4.28 | Expt1 |
| MPAAFMGMLK               | 12  | 13385466                                                    | N-Term(iTRAQ4plex), K10(iTRAQ4plex)                  | 1384.74309 | 76 | 73  |      | 3.67 | Expt1 |
| LLIVSAPDPSNR             | 6   | 21703702                                                    | N-Term(iTRAQ4plex)                                   | 1425.81560 | 76 | 66  |      | 3.61 | Expt1 |
| AQAELESVSTLSEAESK        | 12  | 29336026                                                    | N-Term(iTRAQ4plex), K18(iTRAQ4plex)                  | 2138.11186 | 75 | 107 |      | 4.98 | Expt1 |
| VQANLDPDINIEGPEAK        | 12  | 61743961                                                    | N-Term(iTRAQ4plex), K18(iTRAQ4plex)                  | 2212.17339 | 75 | 90  |      | 6.15 | Expt1 |
| TTYLVLDEADR              | 21  | 83816893                                                    | N-Term(iTRAQ4plex)                                   | 1439.75224 | 75 | 73  |      | 4.36 | Expt1 |
| YLAEVATGEK               | 6   | 31543976                                                    | N-Term(iTRAQ4plex), K10(iTRAQ4plex)                  | 1368.76958 | 75 | 62  |      | 3.74 | Expt1 |
| QAADMILLDDNFASIVTGVVEGR  | 5   | 21450277;30409956;226958351;21450321                        | N-Term(iTRAQ4plex)                                   | 2608.31504 | 75 | 73  |      | 5.64 | Expt1 |
| DTDTGALLFIGR             | 26  | 117606335                                                   | N-Term(iTRAQ4plex)                                   | 1422.77324 | 75 | 87  |      | 5.12 | Expt1 |

|                        |    |                                                 |                                                                                     |            |    |     |      |      |       |
|------------------------|----|-------------------------------------------------|-------------------------------------------------------------------------------------|------------|----|-----|------|------|-------|
| GIQDVYVLSSEQGLLLK      | 13 | 239052674                                       | N-Term(iTRAQ4plex), K17(iTRAQ4plex)                                                 | 2191.26578 | 75 | 70  |      | 4.79 | Expt1 |
| GAVSAEQVIAGFNR         | 9  | 31981577                                        | N-Term(iTRAQ4plex)                                                                  | 1562.84282 | 75 | 71  |      | 5.44 | Expt1 |
| DAVLLVFANK             | 37 | 6680722;6680718;6680716;149254976               | N-Term(iTRAQ4plex), K10(iTRAQ4plex)                                                 | 1377.83769 | 75 | 75  | 1.40 | 4.23 | Expt1 |
| QSGQCLDIDECR           | 9  | 6753824                                         | N-Term(iTRAQ4plex), C5(Methylthio), C11(Methylthio)                                 | 1602.65373 | 75 | 67  |      | 4.52 | Expt1 |
| LSLQDAVNQGLIDQDMATR    | 31 | 82950147;82950149;149264086                     | N-Term(iTRAQ4plex), M16(Oxidation)                                                  | 2248.14237 | 75 | 73  |      | 6.86 | Expt1 |
| EGIPALDNFLDKL          | 29 | 33859482                                        | N-Term(iTRAQ4plex), K12(iTRAQ4plex)                                                 | 1732.97856 | 75 | 62  | 1.23 | 5.12 | Expt1 |
| GIVLLELLPK             | 5  | 13384998;253735731                              | N-Term(iTRAQ4plex), K11(iTRAQ4plex)                                                 | 1511.96794 | 75 | 67  |      | 4.18 | Expt1 |
| ANDDIIVNWVNR           | 10 | 21704120;262050551                              | N-Term(iTRAQ4plex)                                                                  | 1572.82915 | 75 | 64  |      | 4.48 | Expt1 |
| LTEMETMQSQLMAEK        | 10 | 114326446                                       | N-Term(iTRAQ4plex), K15(iTRAQ4plex)                                                 | 2058.02213 | 75 | 62  |      | 4.79 | Expt1 |
| GELEDLTDSTNAQQLR       | 10 | 29336026                                        | N-Term(iTRAQ4plex)                                                                  | 2063.00005 | 75 | 99  |      | 5.44 | Expt1 |
| ETVVEVPQVTWEDIGGLEDVK  | 13 | 225543319;94408011                              | N-Term(iTRAQ4plex), K21(iTRAQ4plex)                                                 | 2630.38803 | 75 | 89  |      | 5.06 | Expt1 |
| GNPSGIQPDLLISLTAPK     | 11 | 21553309                                        | N-Term(iTRAQ4plex), K18(iTRAQ4plex)                                                 | 2109.22263 | 75 | 59  |      | 4.09 | Expt1 |
| TPAQFDADELRL           | 55 | 124517663                                       | N-Term(iTRAQ4plex)                                                                  | 1406.70574 | 75 | 64  |      | 4.12 | Expt1 |
| LPSDVVEESAR            | 79 | 148277039                                       | N-Term(iTRAQ4plex)                                                                  | 1345.70989 | 75 | 70  |      | 3.91 | Expt1 |
| ALYQAEAFADTFQQR        | 8  | 130503301                                       | N-Term(iTRAQ4plex)                                                                  | 2000.00077 | 75 | 67  |      | 5.91 | Expt1 |
| LEEDEEELFK             | 8  | 153792001                                       | N-Term(iTRAQ4plex), K11(iTRAQ4plex)                                                 | 1669.84575 | 75 | 58  |      | 5.04 | Expt1 |
| SAMPFTASPAPSTR         | 11 | 158635992                                       | N-Term(iTRAQ4plex)                                                                  | 1564.79436 | 75 | 75  |      | 4.02 | Expt1 |
| DLPELALDTPR            | 11 | 110625656;270309161                             | N-Term(iTRAQ4plex)                                                                  | 1383.76152 | 75 | 66  |      | 3.81 | Expt1 |
| QTTVSNQSQYQAEFEISK     | 19 | 31543974                                        | N-Term(iTRAQ4plex), K19(iTRAQ4plex)                                                 | 2447.23442 | 75 | 92  |      | 6.02 | Expt1 |
| VVIVDPETNK             | 6  | 82950147;82950149;149264086                     | N-Term(iTRAQ4plex), K10(iTRAQ4plex)                                                 | 1401.82732 | 75 | 61  |      | 3.75 | Expt1 |
| VNSVNPVVLDTMGK         | 13 | 6671688                                         | N-Term(iTRAQ4plex), K15(iTRAQ4plex)                                                 | 1862.03789 | 75 | 86  |      | 6.05 | Expt1 |
| QAALQVADGFISR          | 9  | 110227377                                       | N-Term(iTRAQ4plex)                                                                  | 1519.83550 | 75 | 64  |      | 4.31 | Expt1 |
| ILIANGTMDTDK           | 6  | 126521835                                       | N-Term(iTRAQ4plex), K12(iTRAQ4plex)                                                 | 1579.86638 | 75 | 69  |      | 4.65 | Expt1 |
| ACGDSTLTQITAGLDPVGR    | 19 | 13937391                                        | N-Term(iTRAQ4plex), C2(Methylthio)                                                  | 2065.01592 | 75 | 97  |      | 5.59 | Expt1 |
| IQEYNVLLDTLR           | 6  | 63999380                                        | N-Term(iTRAQ4plex)                                                                  | 1707.94621 | 75 | 61  |      | 4.63 | Expt1 |
| EADIDGDGQVNYEEFVQMMTAK | 12 | 6753244                                         | N-Term(iTRAQ4plex), M18(Oxidation), K22(iTRAQ4plex)                                 | 2794.28757 | 75 | 92  |      | 6.38 | Expt1 |
| EANIDGDGQVNYEEFVQMMTAK | 14 | 149255253;149255689                             | N-Term(iTRAQ4plex), N3(Deamidated), M18(Oxidation), K22(iTRAQ4plex)                 | 2794.28757 | 75 | 92  |      | 6.38 | Expt1 |
| GGNTMTGDAIDYLVK        | 39 | 111074529                                       | N-Term(iTRAQ4plex), M5(Oxidation), K15(iTRAQ4plex)                                  | 1858.95426 | 75 | 73  |      | 4.72 | Expt1 |
| GEVITTYCPANNEPIAR      | 12 | 188219757;188035915                             | N-Term(iTRAQ4plex), C8(Methylthio)                                                  | 2037.98967 | 75 | 63  |      | 4.68 | Expt1 |
| MLDYLQGSGETPQTDIR      | 11 | 6679891                                         | N-Term(iTRAQ4plex)                                                                  | 2068.01055 | 75 | 92  |      | 4.67 | Expt1 |
| GLPWQSSDQDIAR          | 3  | 165972311                                       | N-Term(iTRAQ4plex)                                                                  | 1616.81536 | 75 | 53  |      | 3.63 | Expt1 |
| EESGAVAAAAVPAQSTAR     | 11 | 165377185                                       | N-Term(iTRAQ4plex)                                                                  | 1916.97917 | 75 | 111 |      | 5.79 | Expt1 |
| DCPQECCPPNFPTAMYCDNR   | 38 | 10946680                                        | N-Term(iTRAQ4plex), C2(Methylthio), C6(Methylthio), C8(Methylthio), C18(Methylthio) | 2746.95407 | 75 | 63  |      | 5.67 | Expt1 |
| LYSVSYLLK              | 3  | 125347376                                       | N-Term(iTRAQ4plex), K9(iTRAQ4plex)                                                  | 1373.83757 | 75 | 65  |      | 3.43 | Expt1 |
| VSVATPDVSLSEAGAVK      | 14 | 61743961                                        | N-Term(iTRAQ4plex), K18(iTRAQ4plex)                                                 | 2047.11577 | 75 | 109 |      | 5.28 | Expt1 |
| DLTTAGAVTQCYR          | 39 | 149240702;162287138;58037465                    | N-Term(iTRAQ4plex), C11(Methylthio)                                                 | 1588.75614 | 75 | 72  |      | 4.88 | Expt1 |
| DTADGILTDVILK          | 15 | 8394362                                         | N-Term(iTRAQ4plex), K13(iTRAQ4plex)                                                 | 1661.96024 | 75 | 68  |      | 4.88 | Expt1 |
| ESTSFQDVGPQAPVGSVYQK   | 14 | 7304993;226423871;226423873                     | N-Term(iTRAQ4plex), K20(iTRAQ4plex)                                                 | 2412.23343 | 75 | 57  |      | 6.15 | Expt1 |
| ESTGAQVQVAGDMLPNSTER   | 30 | 157042772;6754994;157041229;157057549;171906586 | N-Term(iTRAQ4plex)                                                                  | 2234.08550 | 74 | 95  |      | 6.03 | Expt1 |
| MVVLTSPPQVSDSMR        | 36 | 7305121                                         | N-Term(iTRAQ4plex)                                                                  | 1693.87651 | 74 | 73  | 1.20 | 4.92 | Expt1 |
| DIISDTSGDFR            | 42 | 149260099;6996913                               | N-Term(iTRAQ4plex)                                                                  | 1369.67351 | 74 | 58  |      | 4.40 | Expt1 |
| GAVYSFDPVGSYQR         | 11 | 7242197                                         | N-Term(iTRAQ4plex)                                                                  | 1689.83733 | 74 | 71  |      | 4.52 | Expt1 |
| LEEDVLPENGIK           | 17 | 148747546                                       | N-Term(iTRAQ4plex), K12(iTRAQ4plex)                                                 | 1660.91423 | 74 | 103 |      | 4.49 | Expt1 |
| TVLIMELINNVAK          | 15 | 31980648                                        | N-Term(iTRAQ4plex), M5(Oxidation), K13(iTRAQ4plex)                                  | 1762.04399 | 74 | 79  |      | 4.47 | Expt1 |
| FGFTDEQAIVDVVSNR       | 28 | 160707958                                       | N-Term(iTRAQ4plex)                                                                  | 1850.94097 | 74 | 103 |      | 6.66 | Expt1 |
| DFGWDPFCFPDGYEQTYAEMPK | 8  | 31982664                                        | N-Term(iTRAQ4plex), C7(Methylthio), K22(iTRAQ4plex)                                 | 2958.27500 | 74 | 58  |      | 4.21 | Expt1 |
| IIPGFMCCGGDFTR         | 22 | 149257773;6679439                               | N-Term(iTRAQ4plex), M6(Oxidation), C7(Methylthio)                                   | 1747.81194 | 74 | 73  |      | 3.39 | Expt1 |
| IEQQLNPETLLQWNPSTMANAK | 3  | 6678103                                         | N-Term(iTRAQ4plex), M19(Oxidation), K23(iTRAQ4plex)                                 | 2931.51670 | 74 | 60  |      | 6.48 | Expt1 |
| DVYIVQDLMETDLYK        | 8  | 21489933;6754632                                | N-Term(iTRAQ4plex), K15(iTRAQ4plex)                                                 | 2133.10947 | 74 | 79  |      | 4.93 | Expt1 |
| LPFFIIDDK              | 21 | 28916703;6671549                                | N-Term(iTRAQ4plex), K9(iTRAQ4plex)                                                  | 1345.80132 | 74 | 79  |      | 3.54 | Expt1 |

|                                   |     |                                                                                      |                                                                          |            |    |     |      |      |       |
|-----------------------------------|-----|--------------------------------------------------------------------------------------|--------------------------------------------------------------------------|------------|----|-----|------|------|-------|
| SVSIGYLLVK                        | 6   | 226437587                                                                            | N-Term(iTRAQ4plex), K10(iTRAQ4plex)                                      | 1366.85320 | 74 | 77  |      | 4.20 | Expt1 |
| TDIGDTMYYLVH                      | 3   | 120537241                                                                            | N-Term(iTRAQ4plex)                                                       | 1507.76140 | 74 | 92  |      | 3.31 | Expt1 |
| AWVEQEGVSVK                       | 6   | 149265291;22165408                                                                   | N-Term(iTRAQ4plex), K11(iTRAQ4plex)                                      | 1519.84490 | 74 | 82  |      | 4.52 | Expt1 |
| LLSLVDDEAFIR                      | 13  | 24418919                                                                             | N-Term(iTRAQ4plex)                                                       | 1534.86345 | 74 | 77  |      | 4.70 | Expt1 |
| VVAFSPVTELK                       | 3   | 31560653                                                                             | N-Term(iTRAQ4plex), K11(iTRAQ4plex)                                      | 1477.88799 | 74 | 77  |      | 3.97 | Expt1 |
| GATQQILDEAER                      | 19  | 126521835                                                                            | N-Term(iTRAQ4plex)                                                       | 1474.76335 | 74 | 72  |      | 4.80 | Expt1 |
| LNSILQATEQR                       | 28  | 82950147;149264086                                                                   | N-Term(iTRAQ4plex)                                                       | 1531.82024 | 74 | 72  |      | 4.65 | Expt1 |
| ELNDFISYLQR                       | 23  | 112293264                                                                            | N-Term(iTRAQ4plex)                                                       | 1541.81157 | 74 | 72  |      | 4.22 | Expt1 |
| FLAVGLVDNTR                       | 8   | 19527174                                                                             | N-Term(iTRAQ4plex)                                                       | 1447.84331 | 74 | 70  |      | 4.40 | Expt1 |
| NIVEIEDLVAR                       | 11  | 34996495                                                                             | N-Term(iTRAQ4plex)                                                       | 1543.84746 | 74 | 69  |      | 4.55 | Expt1 |
| YTMGDAPDYDR                       | 6   | 28076911;6680121                                                                     | N-Term(iTRAQ4plex)                                                       | 1447.62737 | 74 | 55  |      | 4.06 | Expt1 |
| EAFNMIDQNR                        | 26  | 21728376;71037403;19827855<br>3                                                      | N-Term(iTRAQ4plex)                                                       | 1381.66619 | 74 | 54  |      | 3.88 | Expt1 |
| FSTSQSLPASQTR                     | 4   | 31982171                                                                             | N-Term(iTRAQ4plex)                                                       | 1553.80766 | 74 | 50  |      | 3.51 | Expt1 |
| SVIEPLVPTPR                       | 10  | 112181194                                                                            | N-Term(iTRAQ4plex)                                                       | 1452.85564 | 74 | 66  |      | 2.99 | Expt1 |
| GDYQTSPLLETR                      | 23  | 226246550                                                                            | N-Term(iTRAQ4plex)                                                       | 1523.78154 | 74 | 64  |      | 4.08 | Expt1 |
| TVGIDDLTGEPLIQR                   | 10  | 23956104                                                                             | N-Term(iTRAQ4plex)                                                       | 1770.97673 | 74 | 88  |      | 4.96 | Expt1 |
| VNQIGSVTESLQACK                   | 16  | 149253386;6679651                                                                    | N-Term(iTRAQ4plex), C14(Methylthio), K15(iTRAQ4plex)                     | 1910.99631 | 74 | 77  |      | 5.70 | Expt1 |
| LVLANNCPALR                       | 43  | 149263482;82890078;1492515<br>58;94408110                                            | N-Term(iTRAQ4plex), C8(Methylthio)                                       | 1486.83769 | 74 | 64  | 1.61 | 4.33 | Expt1 |
| FTVTPSTTQVVGILK                   | 8   | 6671672                                                                              | N-Term(iTRAQ4plex), K15(iTRAQ4plex)                                      | 1879.12163 | 74 | 89  |      | 5.70 | Expt1 |
| QGFCELLQAVPLADSFR                 | 9   | 6753086                                                                              | N-Term(iTRAQ4plex)                                                       | 1992.07475 | 74 | 86  |      | 5.32 | Expt1 |
| YWEIFPNTFR                        | 168 | 6681143                                                                              | N-Term(iTRAQ4plex), N7(Deamidated)                                       | 1517.75798 | 74 | 54  |      | 4.10 | Expt1 |
| ALIAAQYSGAQVR                     | 22  | 82795783;51704904;11062597<br>9                                                      | N-Term(iTRAQ4plex)                                                       | 1491.84197 | 74 | 63  |      | 4.54 | Expt1 |
| ATDAEADVASLNR                     | 6   | 31560030;11875203;25600078<br>0;256000786;256000794;25600<br>0784                    | N-Term(iTRAQ4plex)                                                       | 1476.74199 | 74 | 77  |      | 3.72 | Expt1 |
| CFSIDNPGYEPEVVAVHPGGDTVAVGGTDGNVR | 4   | 6755995                                                                              | N-Term(iTRAQ4plex), C1(Methylthio)                                       | 3518.64804 | 74 | 45  |      | 5.00 | Expt1 |
| MALDDMISTLK                       | 3   | 6753320                                                                              | N-Term(iTRAQ4plex), K11(iTRAQ4plex)                                      | 1525.82695 | 74 | 76  |      | 4.16 | Expt1 |
| VCSPISGLYQGAGAPGAGGFGAQAPK        | 10  | 124339829                                                                            | N-Term(iTRAQ4plex), C2(Methylthio), K27(iTRAQ4plex)                      | 2808.44712 | 74 | 67  |      | 6.45 | Expt1 |
| VDIEAPDVSIEGPEGK                  | 14  | 61743961                                                                             | N-Term(iTRAQ4plex), K16(iTRAQ4plex)                                      | 1943.02878 | 74 | 67  |      | 5.68 | Expt1 |
| IEEVPELPLVVEDK                    | 28  | 30794450                                                                             | N-Term(iTRAQ4plex), K14(iTRAQ4plex)                                      | 1897.08086 | 74 | 76  | 1.19 | 4.81 | Expt1 |
| WALLQEQGTK                        | 93  | 51092301;20911031;54607171;<br>113195684                                             | N-Term(iTRAQ4plex), K10(iTRAQ4plex)                                      | 1461.83537 | 74 | 72  |      | 4.72 | Expt1 |
| STNGDTFLGGEDFDQALLR               | 10  | 162461907                                                                            | N-Term(iTRAQ4plex), N3(Deamidated)                                       | 2201.04766 | 74 | 110 |      | 5.51 | Expt1 |
| VENNDADYPWPR                      | 24  | 188219537                                                                            | N-Term(iTRAQ4plex)                                                       | 1619.76042 | 74 | 56  |      | 4.58 | Expt1 |
| LFYINPSSGEFLGR                    | 23  | 6680744                                                                              | N-Term(iTRAQ4plex)                                                       | 1743.92351 | 74 | 69  |      | 4.39 | Expt1 |
| TPDPVIFVFGFR                      | 12  | 46519156;46519160;14926785<br>5;82800155;149267539;829658<br>49;149271781            | N-Term(iTRAQ4plex)                                                       | 1542.84722 | 74 | 52  |      | 4.04 | Expt1 |
| NIEDVIAQGVGK                      | 15  | 149263166;83745120                                                                   | N-Term(iTRAQ4plex), K12(iTRAQ4plex)                                      | 1530.87676 | 74 | 92  |      | 4.27 | Expt1 |
| TYADYESVNECMGVCK                  | 8   | 149258586                                                                            | N-Term(iTRAQ4plex), C11(Methylthio), C16(Methylthio),<br>K17(iTRAQ4plex) | 2320.95517 | 74 | 65  |      | 5.17 | Expt1 |
| EYQELMNVK                         | 23  | 29789317;149266993;8570168<br>0;54607171;113195684;114145<br>561;225903444;269914154 | N-Term(iTRAQ4plex), K9(iTRAQ4plex)                                       | 1441.76372 | 74 | 64  |      | 4.44 | Expt1 |
| LDDCGLTEVR                        | 8   | 31981748;285402638;2854026<br>59                                                     | N-Term(iTRAQ4plex), C4(Methylthio)                                       | 1310.62297 | 74 | 50  |      | 3.37 | Expt1 |
| IVYSPVAGTRPSESIVVPGNTR            | 14  | 111074529                                                                            | N-Term(iTRAQ4plex)                                                       | 2443.34342 | 74 | 49  |      | 3.99 | Expt1 |
| TLEAVQDILLEQGR                    | 12  | 93102409                                                                             | N-Term(iTRAQ4plex)                                                       | 1615.88298 | 74 | 76  |      | 4.66 | Expt1 |
| ELNVQVDDSYAR                      | 8   | 9790167                                                                              | N-Term(iTRAQ4plex)                                                       | 1552.77605 | 74 | 84  |      | 4.37 | Expt1 |
| GMSLNLEPDNVGVVVFVGNDR             | 3   | 6680748                                                                              | N-Term(iTRAQ4plex), M2(Oxidation), K20(iTRAQ4plex)                       | 2408.23917 | 74 | 56  |      | 5.30 | Expt1 |
| TEAESWYQTK                        | 10  | 20911031                                                                             | N-Term(iTRAQ4plex), K10(iTRAQ4plex)                                      | 1530.77263 | 74 | 71  |      | 5.09 | Expt1 |
| VISQVLQLGNIAFK                    | 15  | 114326446                                                                            | N-Term(iTRAQ4plex), K14(iTRAQ4plex)                                      | 1747.08231 | 74 | 67  |      | 4.12 | Expt1 |
| SGLGSQVQLMPGSGVPGVGR              | 35  | 86613790                                                                             | N-Term(iTRAQ4plex), M10(Oxidation)                                       | 2012.06828 | 74 | 81  |      | 5.79 | Expt1 |
| ECNACLNPEGNLCIR                   | 52  | 31560625                                                                             | N-Term(iTRAQ4plex), C2(Methylthio), C5(Methylthio),<br>C13(Methylthio)   | 1930.79192 | 74 | 74  |      | 5.12 | Expt1 |



|                           |    |                                                   |                                                      |            |    |     |      |       |       |
|---------------------------|----|---------------------------------------------------|------------------------------------------------------|------------|----|-----|------|-------|-------|
| VELEDWEGNAR               | 34 | 88196773                                          | N-Term(iTRAQ4plex)                                   | 1461.71099 | 73 | 60  | 4.51 | Expt1 |       |
| QVYEEYGSNLEDDVVGDTSGYYQR  | 9  | 6753060                                           | N-Term(iTRAQ4plex)                                   | 3059.35123 | 73 | 109 | 5.79 | Expt1 |       |
| VEPGLGADNSVVR             | 8  | 125347376                                         | N-Term(iTRAQ4plex)                                   | 1456.78813 | 73 | 70  | 3.72 | Expt1 |       |
| SLDEAIEFINR               | 14 | 38084778;94405733                                 | N-Term(iTRAQ4plex)                                   | 1450.76811 | 73 | 61  | 4.49 | Expt1 |       |
| DLLTAYYDVDYEK             | 14 | 112293264                                         | N-Term(iTRAQ4plex), K13(iTRAQ4plex)                  | 1895.95757 | 73 | 76  | 4.89 | Expt1 |       |
| NFATSLYSMIK               | 10 | 6753060                                           | N-Term(iTRAQ4plex), K11(iTRAQ4plex)                  | 1562.85808 | 73 | 77  | 4.63 | Expt1 |       |
| VALVYQGMNEPPGAR           | 66 | 31980648                                          | N-Term(iTRAQ4plex)                                   | 1745.91057 | 73 | 75  | 1.22 | 5.13  | Expt1 |
| AEATASALADADLEER          | 10 | 21312151                                          | N-Term(iTRAQ4plex)                                   | 1962.94011 | 73 | 100 | 5.47 | Expt1 |       |
| LAPGTDPIQNFVAVDNGPGLDR    | 10 | 115647999                                         | N-Term(iTRAQ4plex)                                   | 2458.25516 | 73 | 54  | 5.63 | Expt1 |       |
| AILDLEPGTMDSVR            | 53 | 33859488;7106439;21746161;12963615                | N-Term(iTRAQ4plex), M11(Oxidation)                   | 1775.93534 | 73 | 67  | 4.23 | Expt1 |       |
| NTGIICTIGPASR             | 44 | 31981562                                          | N-Term(iTRAQ4plex), C6(Methylthio)                   | 1492.77471 | 73 | 67  | 4.41 | Expt1 |       |
| AALDGTGPMIGYGMAK          | 3  | 21312520                                          | N-Term(iTRAQ4plex), K16(iTRAQ4plex)                  | 1840.95488 | 73 | 121 | 5.21 | Expt1 |       |
| NDPEILAMTNLVSAYQNNDITEFEK | 3  | 70909327                                          | N-Term(iTRAQ4plex), K25(iTRAQ4plex)                  | 3157.56882 | 73 | 88  | 6.92 | Expt1 |       |
| ISLPLPTFFSSLNLR           | 38 | 31982755                                          | N-Term(iTRAQ4plex)                                   | 1702.00871 | 73 | 76  | 4.50 | Expt1 |       |
| FEELCSDLFR                | 26 | 124339829;124339826                               | N-Term(iTRAQ4plex), C5(Methylthio)                   | 1448.67021 | 73 | 53  | 4.14 | Expt1 |       |
| AALNALQPPEFR              | 5  | 124486867                                         | N-Term(iTRAQ4plex)                                   | 1470.82012 | 73 | 40  | 3.82 | Expt1 |       |
| VEPAVSSIVNSIQVLASK        | 3  | 19482168;124486712                                | N-Term(iTRAQ4plex), K18(iTRAQ4plex)                  | 2129.24521 | 73 | 65  | 6.58 | Expt1 |       |
| ITVTSEVPFSK               | 3  | 149248848;149249070;149256880;149258340;149261616 | N-Term(iTRAQ4plex), K11(iTRAQ4plex)                  | 1495.86724 | 73 | 69  | 4.83 | Expt1 |       |
| YDMVTDCSYTVAQVR           | 15 | 86439989                                          | N-Term(iTRAQ4plex), C7(Methylthio)                   | 1940.87363 | 73 | 80  | 5.30 | Expt1 |       |
| TLSSMIMADTSGYYK           | 12 | 22165408                                          | N-Term(iTRAQ4plex), K15(iTRAQ4plex)                  | 1955.97759 | 73 | 85  | 5.51 | Expt1 |       |
| LQVSNVLSQPLAQAQAVK        | 6  | 34996495                                          | N-Term(iTRAQ4plex), K17(iTRAQ4plex)                  | 2054.22873 | 73 | 67  | 5.35 | Expt1 |       |
| FSIEDALQSGR               | 17 | 112421039                                         | N-Term(iTRAQ4plex)                                   | 1366.71050 | 73 | 70  | 4.14 | Expt1 |       |
| TGTAEMSSILEER             | 20 | 6680748                                           | N-Term(iTRAQ4plex)                                   | 1567.77764 | 73 | 73  | 4.84 | Expt1 |       |
| GDIASQNMNR                | 47 | 111074529                                         | N-Term(iTRAQ4plex)                                   | 1266.60600 | 73 | 64  | 3.84 | Expt1 |       |
| IVLLDSSLEYK               | 14 | 6753320                                           | N-Term(iTRAQ4plex), K11(iTRAQ4plex)                  | 1567.92412 | 73 | 88  | 1.48 | 4.61  | Expt1 |
| EGDLITLLVPEAR             | 15 | 83649713;83642836;262231776                       | N-Term(iTRAQ4plex)                                   | 1569.89983 | 73 | 78  | 4.34 | Expt1 |       |
| QLLTLNLSQAR               | 27 | 149266483                                         | N-Term(iTRAQ4plex)                                   | 1616.91387 | 73 | 77  | 1.22 | 4.91  | Expt1 |
| LLELQEVDSLLR              | 17 | 110735428;110735426                               | N-Term(iTRAQ4plex)                                   | 1571.91887 | 73 | 75  | 4.50 | Expt1 |       |
| YDPPLLEDGAMPASAR          | 19 | 6753262;83649737                                  | N-Term(iTRAQ4plex)                                   | 1662.79106 | 73 | 72  | 3.16 | Expt1 |       |
| AEGPEVDVNLPK              | 12 | 61743961                                          | N-Term(iTRAQ4plex), K12(iTRAQ4plex)                  | 1555.86308 | 73 | 66  | 4.27 | Expt1 |       |
| FQELIFEDFAR               | 28 | 22122641                                          | N-Term(iTRAQ4plex)                                   | 1558.80559 | 73 | 59  | 3.99 | Expt1 |       |
| AVEYLLMGIPGDR             | 7  | 171906578                                         | N-Term(iTRAQ4plex)                                   | 1577.85344 | 73 | 59  | 1.23 | 4.70  | Expt1 |
| LYDNLLEQNLIR              | 13 | 134053905                                         | N-Term(iTRAQ4plex)                                   | 1647.92070 | 73 | 57  | 4.24 | Expt1 |       |
| AAFLSEQLPLSR              | 8  | 7305189                                           | N-Term(iTRAQ4plex)                                   | 1603.89873 | 73 | 53  | 4.70 | Expt1 |       |
| QTSPVSAMLVLVK             | 17 | 149261823;164607147                               | N-Term(iTRAQ4plex), K13(iTRAQ4plex)                  | 1660.99289 | 73 | 71  | 4.57 | Expt1 |       |
| GLLPEELTPLILETQK          | 20 | 227500281                                         | N-Term(iTRAQ4plex), K16(iTRAQ4plex)                  | 2082.23856 | 73 | 59  | 5.40 | Expt1 |       |
| SEIDLFNIR                 | 27 | 6753060                                           | N-Term(iTRAQ4plex)                                   | 1250.68852 | 73 | 53  | 4.08 | Expt1 |       |
| TENPGDASDLQGR             | 13 | 112421039                                         | N-Term(iTRAQ4plex)                                   | 1503.71892 | 73 | 91  | 5.05 | Expt1 |       |
| ELLASVTAPEK               | 6  | 117606335                                         | N-Term(iTRAQ4plex), K11(iTRAQ4plex)                  | 1445.84844 | 73 | 64  | 4.99 | Expt1 |       |
| SLLGEVEQNQLQVAK           | 26 | 112421039                                         | N-Term(iTRAQ4plex), K14(iTRAQ4plex)                  | 1816.04863 | 73 | 103 | 5.19 | Expt1 |       |
| EEIFGPVQQIMK              | 16 | 7106242;85861182                                  | N-Term(iTRAQ4plex), K12(iTRAQ4plex)                  | 1706.94248 | 73 | 61  | 4.61 | Expt1 |       |
| TIEYLEEVAVNFAK            | 3  | 33859811                                          | N-Term(iTRAQ4plex), K14(iTRAQ4plex)                  | 1914.05088 | 73 | 50  | 5.21 | Expt1 |       |
| TADVQIYNVPVTVK            | 6  | 133778947                                         | N-Term(iTRAQ4plex), K14(iTRAQ4plex)                  | 1835.05876 | 73 | 80  | 4.84 | Expt1 |       |
| TPAAVLPVAVSQPIR           | 21 | 145587092                                         | N-Term(iTRAQ4plex)                                   | 1861.10808 | 73 | 82  | 5.02 | Expt1 |       |
| ITSLEVENQNLNR             | 14 | 56699438;54287684                                 | N-Term(iTRAQ4plex)                                   | 1559.85417 | 73 | 68  | 4.75 | Expt1 |       |
| LQYVEDGVYSMQVASAR         | 6  | 62526118                                          | N-Term(iTRAQ4plex)                                   | 2060.02823 | 73 | 72  | 4.91 | Expt1 |       |
| NLEAVETLGTSTICSDK         | 8  | 21450277;30409956;226958351;21450321              | N-Term(iTRAQ4plex), C15(Methylthio), K18(iTRAQ4plex) | 2202.09153 | 73 | 66  | 4.95 | Expt1 |       |
| GFSGLDGAK                 | 3  | 34328108                                          | N-Term(iTRAQ4plex), K9(iTRAQ4plex)                   | 1139.62663 | 73 | 56  | 3.71 | Expt1 |       |
| ALVDELEWEIAR              | 5  | 9903607                                           | N-Term(iTRAQ4plex)                                   | 1587.85271 | 73 | 55  | 3.87 | Expt1 |       |

|                            |     |                                                                                                                  |                                                                     |            |    |     |      |      |       |
|----------------------------|-----|------------------------------------------------------------------------------------------------------------------|---------------------------------------------------------------------|------------|----|-----|------|------|-------|
| SLEEIYFLSLPIK              | 30  | 82898647;149255335;82902507;94383782;94383784;149259263;149263154;149265803;94401827;94402540;94404463           | N-Term(iTRAQ4plex), K13(iTRAQ4plex)                                 | 1840.07598 | 73 | 96  | 1.58 | 4.50 | Expt1 |
| APQVSTPTLVEAAR             | 138 | 163310765                                                                                                        | N-Term(iTRAQ4plex)                                                  | 1583.89092 | 73 | 78  |      | 5.87 | Expt1 |
| FYEGSELVADSGVTIDTTMR       | 24  | 6755781                                                                                                          | N-Term(iTRAQ4plex)                                                  | 2335.13248 | 73 | 73  |      | 5.22 | Expt1 |
| YQLDPTASISAK               | 12  | 6755965                                                                                                          | N-Term(iTRAQ4plex), K12(iTRAQ4plex)                                 | 1581.87322 | 73 | 78  |      | 4.31 | Expt1 |
| APDAWDYSQGFVNEEMIR         | 9   | 19745150                                                                                                         | N-Term(iTRAQ4plex)                                                  | 2272.05400 | 73 | 63  |      | 5.88 | Expt1 |
| PFVELETNLPASR              | 3   | 6753618                                                                                                          | N-Term(iTRAQ4plex)                                                  | 1616.87700 | 73 | 54  |      |      | Expt1 |
| GLGSTVQEIDLTVK             | 6   | 31541909                                                                                                         | N-Term(iTRAQ4plex), K15(iTRAQ4plex)                                 | 1805.03594 | 73 | 105 |      | 5.17 | Expt1 |
| TEFNLNQYYR                 | 63  | 111074529                                                                                                        | N-Term(iTRAQ4plex)                                                  | 1491.73528 | 73 | 54  |      | 4.36 | Expt1 |
| SNLAYDIVQLPTGLTGIK         | 14  | 112293266                                                                                                        | N-Term(iTRAQ4plex), K18(iTRAQ4plex)                                 | 2191.26616 | 72 | 98  | 1.20 | 4.93 | Expt1 |
| ECFCPPSFPTALYCENR          | 40  | 6680554                                                                                                          | N-Term(iTRAQ4plex), C2(Methylthio), C4(Methylthio), C14(Methylthio) | 2258.89946 | 72 | 79  | 1.38 | 5.76 | Expt1 |
| TPDLSVQLPSADLELK           | 31  | 149263538;149263685                                                                                              | N-Term(iTRAQ4plex), K16(iTRAQ4plex)                                 | 2014.13616 | 72 | 82  |      | 5.36 | Expt1 |
| TLSDYNIQK                  | 6   | 9845265;149249766;149250554;149254469;149254584;94378076;82902501;149259705;149259811;149260017;82996161;6755919 | N-Term(iTRAQ4plex), K9(iTRAQ4plex)                                  | 1369.76421 | 72 | 64  |      | 4.13 | Expt1 |
| ALESDMAPVLIMATNR           | 3   | 6755382                                                                                                          | N-Term(iTRAQ4plex)                                                  | 1875.98454 | 72 | 62  |      | 4.62 | Expt1 |
| DSTLIMQLLR                 | 80  | 226874906;31543976;149251472;149263879;134023662;6756037;6756041;6756039;31543974                                | N-Term(iTRAQ4plex)                                                  | 1333.76518 | 72 | 57  |      | 3.99 | Expt1 |
| VDPSPMEDSDDGSPSLPTK        | 3   | 13385882                                                                                                         | N-Term(iTRAQ4plex), K18(iTRAQ4plex)                                 | 2191.07059 | 72 | 71  |      | 5.52 | Expt1 |
| DCEQENWMAAR                | 8   | 115496850                                                                                                        | N-Term(iTRAQ4plex), C2(Methylthio)                                  | 1613.66301 | 72 | 78  |      | 4.93 | Expt1 |
| VVPEMTEILK                 | 3   | 227500281                                                                                                        | N-Term(iTRAQ4plex), K10(iTRAQ4plex)                                 | 1446.84795 | 72 | 62  |      | 3.67 | Expt1 |
| DINDNAPVFNPTSYQGQVPENEVNAR | 9   | 6753374                                                                                                          | N-Term(iTRAQ4plex)                                                  | 3032.44809 | 72 | 84  |      | 6.21 | Expt1 |
| ECPGIEPVCVDLGDWDATEK       | 6   | 6671688                                                                                                          | N-Term(iTRAQ4plex), C2(Methylthio), C9(Methylthio), K20(iTRAQ4plex) | 2556.13432 | 72 | 84  |      | 5.03 | Expt1 |
| NCIVLIDSTPYR               | 19  | 149257598;149250154;82922494;94387984;149264053                                                                  | N-Term(iTRAQ4plex), C2(Methylthio)                                  | 1583.80596 | 72 | 58  |      | 4.30 | Expt1 |
| AAGVSEVPFWPLFAK            | 34  | 94371594;149252277;94381084;149259080;9256519                                                                    | N-Term(iTRAQ4plex), K16(iTRAQ4plex)                                 | 1964.09087 | 72 | 89  |      | 5.74 | Expt1 |
| ELISNSSDALDK               | 3   | 6754254                                                                                                          | N-Term(iTRAQ4plex), K12(iTRAQ4plex)                                 | 1579.84612 | 72 | 85  |      | 5.36 | Expt1 |
| SVFPEQANNNEWAR             | 3   | 19705424                                                                                                         | N-Term(iTRAQ4plex)                                                  | 1805.87285 | 72 | 74  |      | 3.95 | Expt1 |
| EMEALEDER                  | 15  | 114326446                                                                                                        | N-Term(iTRAQ4plex)                                                  | 1394.62358 | 72 | 53  |      | 3.88 | Expt1 |
| GLIDEANQDFNTR              | 3   | 33563252;167555029                                                                                               | N-Term(iTRAQ4plex)                                                  | 1636.80351 | 72 | 68  |      | 4.36 | Expt1 |
| TITFEQFOALEELAK            | 3   | 33469051                                                                                                         | N-Term(iTRAQ4plex), K16(iTRAQ4plex)                                 | 2185.16892 | 72 | 67  |      | 5.35 | Expt1 |
| DTTINEIEDTFR               | 3   | 21314824                                                                                                         | N-Term(iTRAQ4plex)                                                  | 1597.78594 | 72 | 57  |      | 4.60 | Expt1 |
| IGIGGTGLDDPEILEGR          | 7   | 45544618                                                                                                         | N-Term(iTRAQ4plex)                                                  | 1969.07671 | 72 | 85  |      | 5.08 | Expt1 |
| FGQGGAGPVGGQGPR            | 6   | 149252953;23956214                                                                                               | N-Term(iTRAQ4plex)                                                  | 1485.76799 | 72 | 111 |      | 4.70 | Expt1 |
| DMSIQELAVLVSGQK            | 8   | 112421039                                                                                                        | N-Term(iTRAQ4plex), K15(iTRAQ4plex)                                 | 1906.06218 | 72 | 90  |      | 4.88 | Expt1 |
| AIELNPANAVVFCNR            | 3   | 21313588                                                                                                         | N-Term(iTRAQ4plex), C13(Methylthio)                                 | 1884.92363 | 72 | 87  |      | 4.04 | Expt1 |
| FLTNGPSSSPGQER             | 12  | 29336026                                                                                                         | N-Term(iTRAQ4plex), N4(Deamidated)                                  | 1621.79729 | 72 | 57  |      | 3.94 | Expt1 |
| GLGPLAEAAAAGDAAAAGAAR      | 3   | 61098078                                                                                                         | N-Term(iTRAQ4plex)                                                  | 1953.02654 | 72 | 83  |      | 4.94 | Expt1 |
| MLPLLEVAEK                 | 16  | 86439989                                                                                                         | N-Term(iTRAQ4plex), K10(iTRAQ4plex)                                 | 1430.85954 | 72 | 79  |      | 3.99 | Expt1 |
| GVSSGPGMGLMGPR             | 74  | 111120329                                                                                                        | N-Term(iTRAQ4plex), M9(Oxidation)                                   | 1559.78154 | 72 | 96  |      | 4.68 | Expt1 |
| EILVGDVGTVDPPYTTFFVK       | 17  | 149255823;6680924                                                                                                | N-Term(iTRAQ4plex), K20(iTRAQ4plex)                                 | 2484.31821 | 72 | 83  |      | 5.01 | Expt1 |
| FASEIAGVDDLGTTR            | 10  | 229892318                                                                                                        | N-Term(iTRAQ4plex)                                                  | 1752.89458 | 72 | 106 |      | 4.92 | Expt1 |
| LAVEALSSLDGDLGR            | 7   | 10946574                                                                                                         | N-Term(iTRAQ4plex)                                                  | 1746.94170 | 72 | 101 | 1.23 | 4.88 | Expt1 |
| AFGPGLQGGNAGSPAR           | 3   | 125347376                                                                                                        | N-Term(iTRAQ4plex)                                                  | 1600.83586 | 72 | 99  |      | 4.91 | Expt1 |
| NLDSLEEDLDFLR              | 8   | 124248572                                                                                                        | N-Term(iTRAQ4plex)                                                  | 1722.87053 | 72 | 87  |      | 4.13 | Expt1 |
| FYGDNPQTSPLNLR             | 13  | 82997826;38084778;94405733;83019564;34328288                                                                     | N-Term(iTRAQ4plex)                                                  | 1709.84453 | 72 | 84  |      | 4.50 | Expt1 |
| LAAAVSNFQYDLYR             | 21  | 117606335                                                                                                        | N-Term(iTRAQ4plex)                                                  | 1703.89458 | 72 | 81  |      | 4.69 | Expt1 |
| MEEADALIESLCR              | 3   | 74315975                                                                                                         | N-Term(iTRAQ4plex), C12(Methylthio)                                 | 1669.77251 | 72 | 81  |      | 4.33 | Expt1 |

|                               |     |                                                     |                                                                                   |            |    |    |      |      |       |
|-------------------------------|-----|-----------------------------------------------------|-----------------------------------------------------------------------------------|------------|----|----|------|------|-------|
| VYEEDAVPGLTPCR                | 20  | 46593021                                            | N-Term(iTRAQ4plex), C13(Methylthio)                                               | 1738.82720 | 72 | 77 |      | 4.48 | Expt1 |
| GVPGAIVNVSSQASQR              | 3   | 146134409                                           | N-Term(iTRAQ4plex)                                                                | 1713.93657 | 72 | 70 |      | 3.53 | Expt1 |
| EEFPFFPPEEFVFIHAVPVEER        | 7   | 149270322;124487099                                 | N-Term(iTRAQ4plex)                                                                | 2785.40732 | 72 | 62 |      | 5.94 | Expt1 |
| GPVYIGELPQDFLR                | 6   | 13591860                                            | N-Term(iTRAQ4plex)                                                                | 1747.95439 | 72 | 60 |      | 3.94 | Expt1 |
| WFLTCINQPQFR                  | 9   | 110625979                                           | N-Term(iTRAQ4plex), C5(Methylthio)                                                | 1742.86968 | 72 | 54 |      | 3.91 | Expt1 |
| TLTGTVIDSGDGVTHVIPVAEYVIGSCIK | 3   | 23956222                                            | N-Term(iTRAQ4plex), C28(Methylthio), K30(iTRAQ4plex)                              | 3335.75429 | 72 |    |      | 4.04 | Expt1 |
| VIESTQGLGNDLAGVLALQR          | 6   | 55926127                                            | N-Term(iTRAQ4plex)                                                                | 2198.23496 | 72 | 86 |      | 5.96 | Expt1 |
| DVNAAIATIK                    | 16  | 6755901;34740335;6678465;51765047;82930560;6678469  | N-Term(iTRAQ4plex), K10(iTRAQ4plex)                                               | 1303.78862 | 72 | 79 |      | 4.61 | Expt1 |
| MTDQEAIQDLWQWR                | 12  | 149251776;94385641;6679108                          | N-Term(iTRAQ4plex)                                                                | 1963.94975 | 72 | 90 | 1.44 | 5.31 | Expt1 |
| ALALGALQNIR                   | 86  | 111074529                                           | N-Term(iTRAQ4plex)                                                                | 1283.79224 | 72 | 89 |      | 4.37 | Expt1 |
| EVVEEAENGR                    | 32  | 149251474;7110705                                   | N-Term(iTRAQ4plex), N8(Deamidated)                                                | 1276.61565 | 72 | 60 |      | 3.75 | Expt1 |
| LGPALATGNVVMK                 | 8   | 6753036                                             | N-Term(iTRAQ4plex), K14(iTRAQ4plex)                                               | 1657.99785 | 72 | 75 |      | 4.98 | Expt1 |
| VTPPEGYDVVTVFR                | 10  | 158635992                                           | N-Term(iTRAQ4plex)                                                                | 1722.92082 | 72 | 87 |      | 3.48 | Expt1 |
| ALMGSPQLVAAVVR                | 41  | 28395018                                            | N-Term(iTRAQ4plex), M3(Oxidation)                                                 | 1571.91130 | 72 | 74 |      | 4.94 | Expt1 |
| LVPPVDDDEEEER                 | 3   | 66955886                                            | N-Term(iTRAQ4plex)                                                                | 1784.87554 | 72 | 58 |      | 3.06 | Expt1 |
| GLSQSALPYR                    | 14  | 149257465;149257815;82918395;94390143               | N-Term(iTRAQ4plex)                                                                | 1235.68669 | 72 | 46 |      | 3.98 | Expt1 |
| GALVLGSSLK                    | 3   | 7305121                                             | N-Term(iTRAQ4plex), K10(iTRAQ4plex)                                               | 1232.79167 | 72 | 67 |      | 3.47 | Expt1 |
| EITALAPSTMK                   | 37  | 6671509;6752954;6671507;157823889;14192922;33563240 | N-Term(iTRAQ4plex), M10(Oxidation), K11(iTRAQ4plex)                               | 1465.81828 | 72 | 62 |      | 4.15 | Expt1 |
| LLGLVTDFSR                    | 6   | 29336026                                            | N-Term(iTRAQ4plex)                                                                | 1321.76128 | 72 | 63 |      | 3.82 | Expt1 |
| QTALAEIVK                     | 12  | 163310765                                           | N-Term(iTRAQ4plex), K9(iTRAQ4plex)                                                | 1260.78655 | 72 | 59 |      | 4.13 | Expt1 |
| LFDQAQGVPR                    | 42  | 158937312                                           | N-Term(iTRAQ4plex)                                                                | 1293.70952 | 71 | 63 |      | 3.85 | Expt1 |
| IVQDASLTYQQLR                 | 27  | 111185907                                           | N-Term(iTRAQ4plex)                                                                | 1678.92888 | 71 | 84 |      | 5.24 | Expt1 |
| GEFFNELVGQQR                  | 5   | 45504394                                            | N-Term(iTRAQ4plex)                                                                | 1567.80132 | 71 | 64 |      | 4.37 | Expt1 |
| AGNLGGGVVTIER                 | 25  | 149256880                                           | N-Term(iTRAQ4plex)                                                                | 1386.78508 | 71 | 83 |      | 5.19 | Expt1 |
| GATTTFSAVER                   | 42  | 9789943                                             | N-Term(iTRAQ4plex)                                                                | 1283.67082 | 71 | 71 |      | 4.94 | Expt1 |
| IEETLALK                      | 11  | 112363072                                           | N-Term(iTRAQ4plex), K9(iTRAQ4plex)                                                | 1317.82939 | 71 | 80 |      | 4.21 | Expt1 |
| SQILVVEEGSEPSLMK              | 11  | 226246550;226246552                                 | N-Term(iTRAQ4plex), K17(iTRAQ4plex)                                               | 2163.15012 | 71 | 62 |      | 5.23 | Expt1 |
| VTFSSGITFSSVTR                | 10  | 27734847                                            | N-Term(iTRAQ4plex)                                                                | 1719.90483 | 71 | 77 |      | 4.76 | Expt1 |
| LTESPCALVASQYGWSGNMER         | 6   | 6755863                                             | N-Term(iTRAQ4plex), C6(Methylthio)                                                | 2489.14615 | 71 | 66 |      | 5.92 | Expt1 |
| SLSESELIGELSAFDR              | 14  | 33563246                                            | N-Term(iTRAQ4plex)                                                                | 2011.99712 | 71 | 91 |      | 5.07 | Expt1 |
| LQQLDDATVDLGGQK               | 5   | 29336026                                            | N-Term(iTRAQ4plex), K16(iTRAQ4plex)                                               | 2089.10185 | 71 | 85 |      | 5.53 | Expt1 |
| EVAEQLAIEYGPDR                | 8   | 6753670                                             | N-Term(iTRAQ4plex)                                                                | 1733.88762 | 71 | 76 |      | 4.25 | Expt1 |
| ITAVPTLLK                     | 24  | 13386060                                            | N-Term(iTRAQ4plex), K9(iTRAQ4plex)                                                | 1243.82610 | 71 | 65 |      | 3.33 | Expt1 |
| VCEEIAIIPSK                   | 14  | 149261626;149261791;63680669;6677801                | N-Term(iTRAQ4plex), C2(Methylthio), K11(iTRAQ4plex)                               | 1535.84697 | 71 | 59 |      | 3.67 | Expt1 |
| GPLMMYISK                     | 3   | 33859482                                            | N-Term(iTRAQ4plex), K9(iTRAQ4plex)                                                | 1327.74639 | 71 | 54 |      | 4.21 | Expt1 |
| VAGTGEGGLEELVEELNSGK          | 13  | 7304993;226423871;226423873                         | N-Term(iTRAQ4plex), K20(iTRAQ4plex)                                               | 2276.19596 | 71 | 64 |      | 6.05 | Expt1 |
| DMGGYSTTDFIK                  | 3   | 18700024                                            | N-Term(iTRAQ4plex), K13(iTRAQ4plex)                                               | 1723.84551 | 71 | 94 |      | 4.94 | Expt1 |
| YTTDPETEQLQR                  | 26  | 112421039                                           | N-Term(iTRAQ4plex)                                                                | 1753.84172 | 71 | 75 |      | 4.06 | Expt1 |
| MLTAQDMSYDEAR                 | 5   | 117938332;117938334                                 | N-Term(iTRAQ4plex)                                                                | 1674.76018 | 71 | 77 |      | 4.92 | Expt1 |
| NNVTPDMMEEMYK                 | 4   | 149250073;149257749                                 | N-Term(iTRAQ4plex), K13(iTRAQ4plex)                                               | 1889.86919 | 71 | 63 |      | 4.15 | Expt1 |
| GLVAVVTGGASGLGLATAK           | 9   | 61888838                                            | N-Term(iTRAQ4plex), K19(iTRAQ4plex)                                               | 1930.16690 | 71 | 81 |      | 6.31 | Expt1 |
| YVLGNPLTPGINQGPQIDK           | 3   | 85861182                                            | N-Term(iTRAQ4plex), K19(iTRAQ4plex)                                               | 2312.28989 | 71 | 61 |      | 5.74 | Expt1 |
| GVDIVMDPLGGSDTAK              | 7   | 33859662                                            | N-Term(iTRAQ4plex), K16(iTRAQ4plex)                                               | 1862.98459 | 71 | 52 |      | 5.15 | Expt1 |
| SLEQLQLAR                     | 154 | 6680554                                             | N-Term(iTRAQ4plex)                                                                | 1201.70251 | 71 | 79 |      | 3.95 | Expt1 |
| EDLTAAMLIVK                   | 56  | 148277039                                           | N-Term(iTRAQ4plex), K11(iTRAQ4plex)                                               | 1491.87493 | 71 | 92 |      | 4.82 | Expt1 |
| QQSQVLDAMQDSFAR               | 3   | 149266012;214010170                                 | N-Term(iTRAQ4plex)                                                                | 1867.91374 | 71 | 91 |      | 4.99 | Expt1 |
| QSFTMVADTPENLR                | 8   | 6754508                                             | N-Term(iTRAQ4plex)                                                                | 1752.87212 | 71 | 82 |      | 4.82 | Expt1 |
| NMNCIEMGGNPLENSGFEPGAFDGLK    | 25  | 20137008                                            | N-Term(iTRAQ4plex), M2(Oxidation), C4(Methylthio), M7(Oxidation), K26(iTRAQ4plex) | 3107.38474 | 71 | 76 |      | 5.31 | Expt1 |
| QLQNIQATSR                    | 22  | 82950147;82950149;149264086                         | N-Term(iTRAQ4plex)                                                                | 1415.81133 | 71 | 58 |      | 4.28 | Expt1 |

|                           |    |                                                                                                                      |                                                                       |            |    |     |      |      |       |
|---------------------------|----|----------------------------------------------------------------------------------------------------------------------|-----------------------------------------------------------------------|------------|----|-----|------|------|-------|
| LAEFSSQAAEEEEK            | 3  | 29336026                                                                                                             | N-Term(iTRAQ4plex), K14(iTRAQ4plex)                                   | 1855.91850 | 71 | 105 |      | 4.58 | Expt1 |
| VAPGYVTVAEQDAR            | 6  | 110735428;110735426                                                                                                  | N-Term(iTRAQ4plex)                                                    | 1784.89263 | 71 | 95  |      | 4.24 | Expt1 |
| NISFTVWDVGGQDK            | 25 | 6680718;6680716;6671571                                                                                              | N-Term(iTRAQ4plex), K14(iTRAQ4plex)                                   | 1853.96977 | 71 | 93  |      | 4.93 | Expt1 |
| LLLEYTDTSYEDK             | 5  | 6680121                                                                                                              | N-Term(iTRAQ4plex), K13(iTRAQ4plex)                                   | 1877.97014 | 71 | 93  |      | 4.66 | Expt1 |
| EVAGQVGVPLQDLMVR          | 12 | 161016822;161016820                                                                                                  | N-Term(iTRAQ4plex)                                                    | 1855.02629 | 71 | 87  |      | 4.60 | Expt1 |
| AVFDLEPTVIDEIR            | 21 | 6678467                                                                                                              | N-Term(iTRAQ4plex)                                                    | 1860.03349 | 71 | 85  |      | 4.43 | Expt1 |
| LSSEQLNPSVVFGLR           | 3  | 194440742                                                                                                            | N-Term(iTRAQ4plex)                                                    | 1789.99614 | 71 | 74  |      | 4.69 | Expt1 |
| SYIEYQLTPTNTNR            | 6  | 149269540;29568084                                                                                                   | N-Term(iTRAQ4plex)                                                    | 1843.93303 | 71 | 54  |      | 4.26 | Expt1 |
| LWNVDTFVPVGEMR            | 3  | 157823695;157823731;157823795;157823761                                                                              | N-Term(iTRAQ4plex)                                                    | 1806.93303 | 71 | 49  |      | 3.65 | Expt1 |
| TVLIMELINNVAK             | 21 | 31980648                                                                                                             | N-Term(iTRAQ4plex), K13(iTRAQ4plex)                                   | 1746.04985 | 71 | 88  |      | 5.65 | Expt1 |
| IDMYADGTQDLMMMIAVAPFK     | 7  | 160298217                                                                                                            | N-Term(iTRAQ4plex), M13(Oxidation), K21(iTRAQ4plex)                   | 2665.30515 | 71 | 49  |      | 5.08 | Expt1 |
| AIWNVINWENVTER            | 5  | 31980762                                                                                                             | N-Term(iTRAQ4plex)                                                    | 1887.98589 | 71 | 54  |      | 5.15 | Expt1 |
| IVSGAAETDQEYFQGVVR        | 8  | 109627652                                                                                                            | N-Term(iTRAQ4plex)                                                    | 2276.13677 | 71 | 110 |      | 6.27 | Expt1 |
| SWCPDCVEAEPVIR            | 26 | 13386060                                                                                                             | N-Term(iTRAQ4plex), C3(Methylthio), C6(Methylthio)                    | 1839.80400 | 71 | 71  |      | 3.91 | Expt1 |
| SIPAYLAETLYYAMK           | 8  | 6753060                                                                                                              | N-Term(iTRAQ4plex), K15(iTRAQ4plex)                                   | 2022.09116 | 71 | 48  |      | 6.36 | Expt1 |
| LVLVGDGGTGK               | 3  | 149260287;124487358                                                                                                  | N-Term(iTRAQ4plex), K11(iTRAQ4plex)                                   | 1303.78691 | 71 | 61  |      | 3.83 | Expt1 |
| EIYTMDSSTDIK              | 3  | 113195678                                                                                                            | N-Term(iTRAQ4plex), K12(iTRAQ4plex)                                   | 1704.86138 | 71 | 78  |      | 4.40 | Expt1 |
| YMCENQATISSK              | 8  | 163310765                                                                                                            | N-Term(iTRAQ4plex), M2(Oxidation), C3(Methylthio), K12(iTRAQ4plex)    | 1724.79473 | 71 | 75  |      | 4.86 | Expt1 |
| QCANLQAAIADAER            | 43 | 51092301;54607171;113195684                                                                                          | N-Term(iTRAQ4plex), C2(Methylthio)                                    | 1791.86284 | 71 | 70  |      | 5.63 | Expt1 |
| TITMLDEQGEQLNR            | 3  | 6678049                                                                                                              | N-Term(iTRAQ4plex)                                                    | 1791.90557 | 71 | 66  |      | 4.32 | Expt1 |
| QFVTPADVVSNGPK            | 8  | 21704120;262050551;85986577                                                                                          | N-Term(iTRAQ4plex), K14(iTRAQ4plex)                                   | 1746.97002 | 71 | 100 |      | 4.74 | Expt1 |
| LGYILTCSNLGTGLR           | 15 | 6753428;38259206                                                                                                     | N-Term(iTRAQ4plex), C7(Methylthio)                                    | 1867.99590 | 71 | 69  | 1.23 | 4.57 | Expt1 |
| DSLQDGEFTMDLR             | 32 | 6755040                                                                                                              | N-Term(iTRAQ4plex), M11(Oxidation)                                    | 1799.86301 | 71 | 67  |      | 5.27 | Expt1 |
| GIMDEDDACGR               | 22 | 28395018                                                                                                             | N-Term(iTRAQ4plex), C9(Methylthio)                                    | 1371.54582 | 70 | 65  |      | 4.02 | Expt1 |
| NGYELSPTAAANFTR           | 21 | 227116345                                                                                                            | N-Term(iTRAQ4plex), N1(Deamidated)                                    | 1756.86821 | 70 | 88  |      | 4.51 | Expt1 |
| GTYPDCAIK                 | 6  | 6753484                                                                                                              | N-Term(iTRAQ4plex), C6(Methylthio), K9(iTRAQ4plex)                    | 1305.63994 | 70 | 53  |      | 4.40 | Expt1 |
| LNIPNPGQTSVVVDELLPNHSYVFR | 3  | 110735428;110735426                                                                                                  | N-Term(iTRAQ4plex)                                                    | 2952.57785 | 70 | 72  |      | 6.48 | Expt1 |
| IQLVEEELDR                | 21 | 40254525;31560030;11875203;256000780;256000786;256000790;256000792;256000796;256000782;256000788;256000794;256000784 | N-Term(iTRAQ4plex)                                                    | 1387.75688 | 70 | 55  |      | 4.05 | Expt1 |
| DYAAPVNMFTFLGSYFSQK       | 5  | 110625833                                                                                                            | N-Term(iTRAQ4plex), K18(iTRAQ4plex)                                   | 2327.16867 | 70 | 63  |      | 4.71 | Expt1 |
| WLLLTGISAQQNR             | 29 | 51491845                                                                                                             | N-Term(iTRAQ4plex)                                                    | 1643.93790 | 70 | 73  |      | 4.89 | Expt1 |
| LLEAQIATGGIIDPK           | 21 | 82950147;82950149;149264086                                                                                          | N-Term(iTRAQ4plex), K15(iTRAQ4plex)                                   | 1827.09123 | 70 | 90  |      | 4.92 | Expt1 |
| ILGPLSYSK                 | 12 | 160333372                                                                                                            | N-Term(iTRAQ4plex), K9(iTRAQ4plex)                                    | 1265.78069 | 70 | 63  |      | 3.55 | Expt1 |
| LAEMPADSGYPAYLGR          | 3  | 31560731                                                                                                             | N-Term(iTRAQ4plex), M4(Oxidation)                                     | 1941.94927 | 70 | 87  |      | 3.72 | Expt1 |
| AEFGPPGPGPSGR             | 7  | 227499103;227499234                                                                                                  | N-Term(iTRAQ4plex)                                                    | 1369.69853 | 70 | 58  |      | 4.24 | Expt1 |
| DFDSLQAPSFDR              | 28 | 22203747                                                                                                             | N-Term(iTRAQ4plex)                                                    | 1688.80791 | 70 | 62  |      | 4.56 | Expt1 |
| VGLLEALLPGQPEAVAR         | 11 | 6680117                                                                                                              | N-Term(iTRAQ4plex)                                                    | 1877.10185 | 70 | 91  | 1.58 | 4.87 | Expt1 |
| SLCPVSWVSAWDDR            | 9  | 13385090                                                                                                             | N-Term(iTRAQ4plex), C3(Methylthio)                                    | 1810.84111 | 70 | 101 |      | 4.45 | Expt1 |
| AQSELSGAADAAAR            | 15 | 166851828                                                                                                            | N-Term(iTRAQ4plex)                                                    | 1519.74919 | 70 | 95  |      | 4.89 | Expt1 |
| ITGEAFVQFASQELAEK         | 3  | 19527048                                                                                                             | N-Term(iTRAQ4plex), K17(iTRAQ4plex)                                   | 2156.15476 | 70 | 66  |      | 4.94 | Expt1 |
| MQQQLEDEYQELLDIK          | 14 | 9506843;162287370;161760667                                                                                          | N-Term(iTRAQ4plex), K15(iTRAQ4plex)                                   | 2182.13797 | 70 | 64  |      | 5.81 | Expt1 |
| LGNAGIAALCPGLLLPCK        | 3  | 31981748;285402638;285402659                                                                                         | N-Term(iTRAQ4plex), C10(Methylthio), C18(Methylthio), K19(iTRAQ4plex) | 2191.17331 | 70 | 58  |      | 5.16 | Expt1 |
| MSINAEDVVVDLVEVK          | 7  | 21450277                                                                                                             | N-Term(iTRAQ4plex), M1(Oxidation), K17(iTRAQ4plex)                    | 2121.14005 | 70 | 67  |      | 4.92 | Expt1 |
| QLSSGVSEIR                | 27 | 158937312                                                                                                            | N-Term(iTRAQ4plex)                                                    | 1219.67920 | 70 | 81  |      | 4.21 | Expt1 |
| VEIIANDQGNR               | 72 | 124339838;50345978;124339829;124339826;31981690;254540166                                                            | N-Term(iTRAQ4plex)                                                    | 1372.73230 | 70 | 79  | 1.19 | 4.70 | Expt1 |
| EILVGDVGATITDPFK          | 30 | 9790219                                                                                                              | N-Term(iTRAQ4plex), K16(iTRAQ4plex)                                   | 1963.10246 | 70 | 89  |      | 5.79 | Expt1 |
| EGVYTVFAPTNEAFQAMPPEELNK  | 27 | 6678321                                                                                                              | N-Term(iTRAQ4plex), K24(iTRAQ4plex)                                   | 2970.48429 | 70 | 63  |      | 5.93 | Expt1 |

|                          |     |                                                                              |                                                                      |            |    |     |      |      |       |
|--------------------------|-----|------------------------------------------------------------------------------|----------------------------------------------------------------------|------------|----|-----|------|------|-------|
| AGQQAGLQVWR              | 6   | 226246550;226246552                                                          | N-Term(iTRAQ4plex)                                                   | 1357.74687 | 70 | 65  |      | 4.75 | Expt1 |
| SGAQASSTPLSPTR           | 12  | 162287370;161760667                                                          | N-Term(iTRAQ4plex)                                                   | 1503.78960 | 70 | 90  |      | 4.86 | Expt1 |
| DLGEELEALK               | 3   | 114326446;241982716;241982718                                                | N-Term(iTRAQ4plex), K10(iTRAQ4plex)                                  | 1404.78996 | 70 | 67  |      | 4.57 | Expt1 |
| DVDLEFLAK                | 6   | 225543319;94408011                                                           | N-Term(iTRAQ4plex), K9(iTRAQ4plex)                                   | 1337.75640 | 70 | 67  |      | 4.03 | Expt1 |
| VEEAYDLAR                | 19  | 6755204                                                                      | N-Term(iTRAQ4plex)                                                   | 1209.62370 | 70 | 51  |      | 3.31 | Expt1 |
| NIQVYNPTNSLDVR           | 80  | 111074529                                                                    | N-Term(iTRAQ4plex)                                                   | 1873.99309 | 70 | 79  |      | 5.72 | Expt1 |
| GISQEQMNEFR              | 3   | 61097906                                                                     | N-Term(iTRAQ4plex)                                                   | 1482.71526 | 70 | 64  |      | 4.55 | Expt1 |
| GASQAGMTGYGMPR           | 9   | 30519911;9790125                                                             | N-Term(iTRAQ4plex)                                                   | 1527.71709 | 70 | 98  |      | 4.99 | Expt1 |
| GFMTNGADIDECK            | 3   | 118197277                                                                    | N-Term(iTRAQ4plex), N5(Deamidated), C12(Methylthio), K13(iTRAQ4plex) | 1735.75615 | 70 | 69  |      | 4.84 | Expt1 |
| AEELEALLSSK              | 3   | 29336026                                                                     | N-Term(iTRAQ4plex), K10(iTRAQ4plex)                                  | 1348.80083 | 70 | 76  |      | 3.98 | Expt1 |
| NADPILISLK               | 6   | 31542413                                                                     | N-Term(iTRAQ4plex), K10(iTRAQ4plex)                                  | 1371.85027 | 70 | 68  |      | 3.75 | Expt1 |
| GVLFVGPAGFTPGCSK         | 27  | 6755114                                                                      | N-Term(iTRAQ4plex), C14(Methylthio), K16(iTRAQ4plex)                 | 1870.98369 | 70 | 94  |      | 5.54 | Expt1 |
| IILEIDNAR                | 40  | 6754480                                                                      | N-Term(iTRAQ4plex)                                                   | 1200.70867 | 70 | 52  |      | 3.52 | Expt1 |
| IAIAALEVLEEENLAENADK     | 5   | 8393866                                                                      | N-Term(iTRAQ4plex), K20(iTRAQ4plex)                                  | 2443.32199 | 70 | 46  |      | 7.43 | Expt1 |
| SLETENSALQLQVTER         | 34  | 188219589                                                                    | N-Term(iTRAQ4plex)                                                   | 1962.02849 | 70 | 118 |      | 5.73 | Expt1 |
| ETQTEYEWTVDSSK           | 11  | 82950147;82950149;149264086                                                  | N-Term(iTRAQ4plex), K14(iTRAQ4plex)                                  | 1990.95061 | 70 | 111 |      | 4.82 | Expt1 |
| IDAENLSSAPQLDQALR        | 4   | 165972311                                                                    | N-Term(iTRAQ4plex)                                                   | 1985.04509 | 70 | 85  |      | 5.05 | Expt1 |
| EELSSGDSLSPDPWK          | 3   | 145587092                                                                    | N-Term(iTRAQ4plex), K15(iTRAQ4plex)                                  | 1934.96355 | 70 | 71  |      | 4.44 | Expt1 |
| YWQQVIDMNDYQR            | 3   | 6678499                                                                      | N-Term(iTRAQ4plex)                                                   | 1902.89934 | 70 | 60  |      | 3.20 | Expt1 |
| EGMNIVEAMER              | 46  | 6679439                                                                      | N-Term(iTRAQ4plex)                                                   | 1422.68608 | 70 | 67  |      | 4.68 | Expt1 |
| AFLTAEIDILR              | 15  | 7710086                                                                      | N-Term(iTRAQ4plex)                                                   | 1405.82219 | 70 | 71  |      | 4.68 | Expt1 |
| IAIYELLFK                | 20  | 94369782;13399310                                                            | N-Term(iTRAQ4plex), K9(iTRAQ4plex)                                   | 1397.87004 | 70 | 65  |      | 4.41 | Expt1 |
| VVDLLAQDADIVCR           | 9   | 31560737                                                                     | N-Term(iTRAQ4plex), C13(Methylthio)                                  | 1719.89421 | 70 | 66  |      | 4.72 | Expt1 |
| LVADFMK                  | 8   | 6724311                                                                      | N-Term(iTRAQ4plex), K8(iTRAQ4plex)                                   | 1182.68840 | 70 | 69  |      | 3.19 | Expt1 |
| YSTNTQIQVLPEGGGETPIFK    | 12  | 226246550;226246552                                                          | N-Term(iTRAQ4plex), K20(iTRAQ4plex)                                  | 2510.34519 | 70 | 63  |      | 5.52 | Expt1 |
| GTGVVTSVPSDSDDLAALR      | 8   | 120537241                                                                    | N-Term(iTRAQ4plex)                                                   | 2101.09307 | 70 | 88  |      | 4.92 | Expt1 |
| LLEPVLLLGK               | 21  | 149254484;149262347                                                          | N-Term(iTRAQ4plex), K10(iTRAQ4plex)                                  | 1382.92595 | 70 | 74  |      | 4.19 | Expt1 |
| ASEWQLDQPSWSGR           | 4   | 13384758                                                                     | N-Term(iTRAQ4plex)                                                   | 1790.86284 | 70 | 66  | 1.35 | 4.70 | Expt1 |
| FLMANGQLVK               | 13  | 116089273;33859560                                                           | N-Term(iTRAQ4plex), N5(Deamidated), K10(iTRAQ4plex)                  | 1409.81513 | 70 | 65  |      | 4.01 | Expt1 |
| CTNELYWLDQQAQK           | 3   | 112421039                                                                    | N-Term(iTRAQ4plex), C1(Methylthio), K13(iTRAQ4plex)                  | 1945.94089 | 70 | 58  |      | 4.51 | Expt1 |
| SGASLLSNMSR              | 11  | 9790161                                                                      | N-Term(iTRAQ4plex)                                                   | 1266.66008 | 70 | 76  |      | 3.96 | Expt1 |
| FVDSGYPTIK               | 18  | 86198316                                                                     | N-Term(iTRAQ4plex), K10(iTRAQ4plex)                                  | 1414.78899 | 70 | 61  |      | 3.69 | Expt1 |
| YINENLIINTDELGR          | 3   | 110625624                                                                    | N-Term(iTRAQ4plex)                                                   | 1921.01775 | 70 | 79  |      | 5.02 | Expt1 |
| VSFELFADK                | 25  | 149257773;6679439                                                            | N-Term(iTRAQ4plex), K9(iTRAQ4plex)                                   | 1343.75334 | 70 | 78  |      | 3.54 | Expt1 |
| NLMQLNMAK                | 18  | 6680554                                                                      | N-Term(iTRAQ4plex), N1(Deamidated), K9(iTRAQ4plex)                   | 1351.74162 | 70 | 77  |      | 4.51 | Expt1 |
| GLCAIAQAESLR             | 26  | 6755372                                                                      | N-Term(iTRAQ4plex), C3(Methylthio)                                   | 1421.73760 | 70 | 74  |      | 4.37 | Expt1 |
| EIFLSQPILLEEAPLK         | 8   | 161484668;31980772;13994195                                                  | N-Term(iTRAQ4plex), K17(iTRAQ4plex)                                  | 2241.33854 | 70 | 59  |      | 5.23 | Expt1 |
| EYQDLLNVK                | 3   | 149261714;149270717;33563250;31982755;124286811;148539957;39204499;112363107 | N-Term(iTRAQ4plex), K9(iTRAQ4plex)                                   | 1409.79326 | 70 | 58  |      | 4.01 | Expt1 |
| ILDILGETCK               | 3   | 153945866;254028159                                                          | N-Term(iTRAQ4plex), C9(Methylthio), K10(iTRAQ4plex)                  | 1438.78557 | 70 | 69  |      | 3.57 | Expt1 |
| GLFIIDDK                 | 7   | 94400195;149267887;7948999;6754976                                           | N-Term(iTRAQ4plex), K8(iTRAQ4plex)                                   | 1208.72466 | 70 | 46  |      | 3.71 | Expt1 |
| TSAAPEICQEYSGTLR         | 13  | 169234958;32129201;32129205                                                  | N-Term(iTRAQ4plex), C8(Methylthio)                                   | 1915.90178 | 69 | 76  |      | 4.40 | Expt1 |
| SSGTGASVGGPPQPSDQDQTLVQR | 21  | 170650623                                                                    | N-Term(iTRAQ4plex)                                                   | 2328.15434 | 69 | 118 |      | 6.03 | Expt1 |
| QLDGVLGER                | 127 | 20911031                                                                     | N-Term(iTRAQ4plex)                                                   | 1130.62805 | 69 | 76  |      | 3.46 | Expt1 |
| ILTFDQALLES PK           | 43  | 83699424                                                                     | N-Term(iTRAQ4plex), K13(iTRAQ4plex)                                  | 1763.02092 | 69 | 118 | 1.41 | 5.45 | Expt1 |
| FANSLVGVQQQLQAFNTYR      | 6   | 117938332;117938334                                                          | N-Term(iTRAQ4plex)                                                   | 2328.23124 | 69 | 65  |      | 5.25 | Expt1 |
| ELPSGVEEELNLGHDLADR      | 5   | 239052674                                                                    | N-Term(iTRAQ4plex)                                                   | 2318.21463 | 69 | 43  |      | 6.03 | Expt1 |
| TLLGDVVPVADPTV/PNVTVTR   | 3   | 33563236                                                                     | N-Term(iTRAQ4plex)                                                   | 2307.31107 | 69 |     |      | 3.72 | Expt1 |
| FLEMCDLLAR               | 3   | 112293266                                                                    | N-Term(iTRAQ4plex), C5(Methylthio)                                   | 1515.71770 | 69 | 51  |      | 3.74 | Expt1 |
| LAAGDQLLSVDGR            | 3   | 145587092                                                                    | N-Term(iTRAQ4plex)                                                   | 1458.80425 | 69 | 70  |      | 4.38 | Expt1 |

|                              |    |                                                     |                                                                                                    |            |    |     |      |      |       |
|------------------------------|----|-----------------------------------------------------|----------------------------------------------------------------------------------------------------|------------|----|-----|------|------|-------|
| LDISAPDLNLEGGPEK             | 15 | 61743961                                            | N-Term(iTRAQ4plex), K16(iTRAQ4plex)                                                                | 1956.05998 | 69 | 104 |      | 6.21 | Expt1 |
| TPSSDVLVFDYTK                | 14 | 47059484;157909799                                  | N-Term(iTRAQ4plex), K13(iTRAQ4plex)                                                                | 1759.94402 | 69 | 77  |      | 4.67 | Expt1 |
| EGDVLTLLESER                 | 35 | 149255324;149254491                                 | N-Term(iTRAQ4plex)                                                                                 | 1504.80205 | 69 | 77  |      | 4.36 | Expt1 |
| FIPLSEPAVPPIPNEQQLAR         | 11 | 114158691                                           | N-Term(iTRAQ4plex)                                                                                 | 2457.36948 | 69 | 46  |      | 4.98 | Expt1 |
| EPSDSWLIASLDLQNSSK           | 11 | 33469047                                            | N-Term(iTRAQ4plex), K18(iTRAQ4plex)                                                                | 2278.18540 | 69 | 82  |      | 5.48 | Expt1 |
| IINEPTAAAAYGLDK              | 14 | 124339838;50345978;31981690;254540166               | N-Term(iTRAQ4plex), K16(iTRAQ4plex)                                                                | 1948.10137 | 69 | 115 |      | 5.16 | Expt1 |
| FDEFFSQGCAPGYEK              | 8  | 20330802                                            | N-Term(iTRAQ4plex), C9(Methylthio), K15(iTRAQ4plex)                                                | 2058.92681 | 69 | 67  |      | 4.68 | Expt1 |
| MMEMFGLVEK                   | 7  | 226423922                                           | N-Term(iTRAQ4plex), K10(iTRAQ4plex)                                                                | 1502.77275 | 69 | 59  |      | 4.02 | Expt1 |
| GVVPEDAVETLAGSLGTR           | 20 | 33563246                                            | N-Term(iTRAQ4plex)                                                                                 | 1915.02703 | 69 | 88  |      | 5.40 | Expt1 |
| EAMCPGVSGEDSLLLATQVEGQTTNLQR | 6  | 28395018                                            | N-Term(iTRAQ4plex), C4(Methylthio)                                                                 | 3224.53562 | 69 | 62  |      | 6.71 | Expt1 |
| ISVFATYSSGEGEPVTDGATTELSQDSK | 8  | 111074529                                           | N-Term(iTRAQ4plex), K28(iTRAQ4plex)                                                                | 3164.54001 | 69 | 111 |      | 6.01 | Expt1 |
| ISEIEDAAFLAR                 | 9  | 23956396;256355015                                  | N-Term(iTRAQ4plex)                                                                                 | 1478.79949 | 69 | 60  |      | 4.60 | Expt1 |
| AAAYEALGDAR                  | 19 | 162287370;161760667                                 | N-Term(iTRAQ4plex)                                                                                 | 1309.65227 | 69 | 65  |      | 4.39 | Expt1 |
| AELIAQPELK                   | 7  | 82950147;82950149;149264086                         | N-Term(iTRAQ4plex), K10(iTRAQ4plex)                                                                | 1399.84233 | 69 | 54  |      | 4.15 | Expt1 |
| SFLGGDSPSMVDYLTWPWFQR        | 6  | 6754090                                             | N-Term(iTRAQ4plex)                                                                                 | 2633.26763 | 69 | 119 |      | 5.96 | Expt1 |
| QVELALWDTAGQEDYDR            | 7  | 160415213;6680726;31542143;240120058                | N-Term(iTRAQ4plex)                                                                                 | 2153.02910 | 69 | 89  |      | 5.19 | Expt1 |
| EAQLALGNAADATEAK             | 6  | 153791270                                           | N-Term(iTRAQ4plex), K17(iTRAQ4plex)                                                                | 1932.02373 | 69 | 93  |      | 5.46 | Expt1 |
| GAEYVADVLK                   | 3  | 226246550                                           | N-Term(iTRAQ4plex), K10(iTRAQ4plex)                                                                | 1352.77263 | 69 | 67  |      | 4.05 | Expt1 |
| YVECSALTQK                   | 18 | 6753364                                             | N-Term(iTRAQ4plex), C4(Methylthio), K10(iTRAQ4plex)                                                | 1475.74748 | 69 | 76  |      | 3.97 | Expt1 |
| NQVAMNPQNTVFDK               | 5  | 124339838                                           | N-Term(iTRAQ4plex), Q8(Deamidated), K15(iTRAQ4plex)                                                | 1966.01335 | 69 | 69  |      |      | Expt1 |
| ATFSSMSGLDSVSDSGEGR          | 3  | 157311641                                           | N-Term(iTRAQ4plex)                                                                                 | 2033.92229 | 69 | 116 |      | 4.67 | Expt1 |
| NTSEQDQPMGGWEMIR             | 5  | 188219589                                           | N-Term(iTRAQ4plex)                                                                                 | 2022.91130 | 69 | 104 |      | 4.88 | Expt1 |
| EVQGFESSTFSGYFK              | 20 | 28916693                                            | N-Term(iTRAQ4plex), K15(iTRAQ4plex)                                                                | 2000.99089 | 69 | 75  |      | 4.49 | Expt1 |
| ALYSNILGEENTYLWR             | 7  | 149258501;19526818                                  | N-Term(iTRAQ4plex)                                                                                 | 2086.07549 | 69 | 53  |      | 4.41 | Expt1 |
| YLSEVASGENK                  | 3  | 31543974                                            | N-Term(iTRAQ4plex), K11(iTRAQ4plex)                                                                | 1484.77849 | 69 | 76  |      | 4.43 | Expt1 |
| AITYLNTGYQR                  | 77 | 148277039                                           | N-Term(iTRAQ4plex), N6(Deamidated)                                                                 | 1444.75652 | 69 | 60  |      | 4.43 | Expt1 |
| AGFAGDDAPR                   | 58 | 6671509;6752954;6671507;157823889;14192922;33563240 | N-Term(iTRAQ4plex)                                                                                 | 1120.55132 | 69 | 69  |      | 3.76 | Expt1 |
| VPSTEAALASSLMGLFEK           | 6  | 116089273                                           | N-Term(iTRAQ4plex), M14(Oxidation), K19(iTRAQ4plex)                                                | 2284.20206 | 69 | 67  |      | 5.98 | Expt1 |
| LIVALMYPYSYEAKE              | 19 | 149265291;22165408                                  | N-Term(iTRAQ4plex), K15(iTRAQ4plex)                                                                | 2046.12798 | 69 | 90  |      | 4.74 | Expt1 |
| SLAENYFDSTGR                 | 17 | 21489937                                            | N-Term(iTRAQ4plex)                                                                                 | 1503.72063 | 69 | 65  |      | 4.31 | Expt1 |
| GSSYFSMDSAEGR                | 15 | 160333881                                           | N-Term(iTRAQ4plex)                                                                                 | 1537.67327 | 69 | 66  |      | 4.51 | Expt1 |
| DNADPYTTLVQGPGETK            | 6  | 111185907                                           | N-Term(iTRAQ4plex), K18(iTRAQ4plex)                                                                | 2236.11650 | 69 | 82  |      | 4.96 | Expt1 |
| GNLGAGNGLQGPR                | 5  | 25141233                                            | N-Term(iTRAQ4plex), N7(Deamidated)                                                                 | 1469.75762 | 69 | 72  |      | 4.67 | Expt1 |
| IDMYADGTQDLMMMAVAPFK         | 8  | 160298217                                           | N-Term(iTRAQ4plex), M3(Oxidation), M12(Oxidation), M13(Oxidation), M14(Oxidation), K21(iTRAQ4plex) | 2713.28922 | 69 | 64  | 1.37 | 6.43 | Expt1 |
| GCDVVVIPAGVPR                | 17 | 31982186                                            | N-Term(iTRAQ4plex), C2(Methylthio)                                                                 | 1471.79082 | 69 | 59  | 1.37 | 4.39 | Expt1 |
| ATVLNLYLQTCIR                | 68 | 148277039                                           | N-Term(iTRAQ4plex), C10(Methylthio)                                                                | 1584.84184 | 69 | 60  |      | 5.29 | Expt1 |
| SAYQEAMDISK                  | 3  | 134023662                                           | N-Term(iTRAQ4plex), K11(iTRAQ4plex)                                                                | 1530.77544 | 69 | 66  |      | 4.55 | Expt1 |
| SQDEVEIPAR                   | 72 | 111074529                                           | N-Term(iTRAQ4plex)                                                                                 | 1287.66631 | 69 | 65  |      | 4.02 | Expt1 |
| FLVGPDPVVR                   | 13 | 84871986                                            | N-Term(iTRAQ4plex)                                                                                 | 1299.75627 | 69 | 50  |      | 3.36 | Expt1 |
| LNYPGIPAIVK                  | 6  | 28395018                                            | N-Term(iTRAQ4plex), K10(iTRAQ4plex)                                                                | 1375.86333 | 69 | 49  |      | 3.55 | Expt1 |
| EPSETPDQCMTADETR             | 4  | 85540471;85540466;85540468                          | N-Term(iTRAQ4plex), C9(Methylthio)                                                                 | 1999.81645 | 69 | 93  |      | 4.94 | Expt1 |
| SMVEDITGLR                   | 24 | 82950147;82950149;149264086                         | N-Term(iTRAQ4plex)                                                                                 | 1264.66948 | 68 | 64  |      | 3.66 | Expt1 |
| ASEQIYGSPSSPYECLR            | 5  | 118601017                                           | N-Term(iTRAQ4plex), C16(Methylthio)                                                                | 2163.98052 | 68 | 63  |      | 5.02 | Expt1 |
| SLDLFNCEVTNLNAYR             | 16 | 40254600                                            | N-Term(iTRAQ4plex), C7(Methylthio)                                                                 | 2061.99314 | 68 | 68  |      | 4.58 | Expt1 |
| DFMIQGGDFTR                  | 23 | 71774133                                            | N-Term(iTRAQ4plex)                                                                                 | 1430.68498 | 68 | 66  |      | 3.94 | Expt1 |
| NLDLDSIIAEVK                 | 33 | 22164776                                            | N-Term(iTRAQ4plex), N1(Deamidated), K12(iTRAQ4plex)                                                | 1618.92339 | 68 | 89  |      | 4.46 | Expt1 |
| MLTPPMGTVMVDLKL              | 19 | 6678321                                             | N-Term(iTRAQ4plex), K14(iTRAQ4plex)                                                                | 1820.99883 | 68 | 75  |      | 5.27 | Expt1 |
| DDPVTNLNNAFEVAEK             | 17 | 11230802                                            | N-Term(iTRAQ4plex), K16(iTRAQ4plex)                                                                | 2064.05644 | 68 | 103 |      | 5.05 | Expt1 |
| SAMPVDAPLCLR                 | 30 | 10946680                                            | N-Term(iTRAQ4plex), C10(Methylthio)                                                                | 1462.73686 | 68 | 65  |      | 3.69 | Expt1 |
| SINQLEDDADR                  | 15 | 111185907                                           | N-Term(iTRAQ4plex)                                                                                 | 1419.68474 | 68 | 56  |      | 4.32 | Expt1 |

|                            |     |                                                          |                                                      |            |    |     |      |      |       |
|----------------------------|-----|----------------------------------------------------------|------------------------------------------------------|------------|----|-----|------|------|-------|
| EAEYFELPELVR               | 11  | 123701966                                                | N-Term(iTRAQ4plex)                                   | 1638.85381 | 68 | 71  |      | 4.56 | Expt1 |
| TFYQIGDSWEK                | 3   | 46849812                                                 | N-Term(iTRAQ4plex), K11(iTRAQ4plex)                  | 1661.84307 | 68 | 50  |      | 4.10 | Expt1 |
| LTEQVFNEAPGIR              | 8   | 33413404                                                 | N-Term(iTRAQ4plex)                                   | 1617.87334 | 68 | 66  |      | 4.72 | Expt1 |
| AAEFAFVNDIDESSPGTEWER      | 9   | 122939192;122939196                                      | N-Term(iTRAQ4plex)                                   | 2496.13335 | 68 | 81  |      | 5.65 | Expt1 |
| GGFVQPTVFSNVTDENR          | 18  | 7106242;85861182                                         | N-Term(iTRAQ4plex), M16(Oxidation)                   | 2134.04770 | 68 | 64  |      | 5.42 | Expt1 |
| NEGATYAAAVLFR              | 22  | 28395018                                                 | N-Term(iTRAQ4plex)                                   | 1627.85893 | 68 | 91  |      | 5.31 | Expt1 |
| LCPPVPGQALMGMVVSPPTPSEPSFK | 3   | 33413404                                                 | N-Term(iTRAQ4plex), C2(Methylthio), K26(iTRAQ4plex)  | 3000.53794 | 68 |     |      | 4.53 | Expt1 |
| MAPYQGDAAPGALDYK           | 14  | 11230802                                                 | N-Term(iTRAQ4plex), M1(Oxidation), K17(iTRAQ4plex)   | 2069.02915 | 68 | 61  |      | 4.84 | Expt1 |
| DSYLILETLPTHEYDSR          | 8   | 228008337                                                | N-Term(iTRAQ4plex)                                   | 2059.03569 | 68 | 75  |      | 4.06 | Expt1 |
| SMLEVNYPMENGIIVR           | 15  | 22122825                                                 | N-Term(iTRAQ4plex), N11(Deamidated)                  | 1896.93657 | 68 | 67  | 1.23 | 4.57 | Expt1 |
| CMPTFQFYK                  | 19  | 6755911                                                  | N-Term(iTRAQ4plex), C1(Methylthio), K9(iTRAQ4plex)   | 1498.71709 | 68 | 68  |      | 3.57 | Expt1 |
| GPQISAPSMDFNLEGPK          | 3   | 61743961                                                 | N-Term(iTRAQ4plex), M9(Oxidation), K17(iTRAQ4plex)   | 2092.06327 | 68 | 54  |      | 4.97 | Expt1 |
| TINEVENQILTR               | 50  | 61097906;11230802                                        | N-Term(iTRAQ4plex)                                   | 1573.86943 | 68 | 72  |      | 4.74 | Expt1 |
| GVDSIPGFEFDR               | 8   | 227499103;227499234                                      | N-Term(iTRAQ4plex)                                   | 1482.73601 | 68 | 46  |      | 3.67 | Expt1 |
| TPVEEVPAAIAPFQGR           | 10  | 19527174                                                 | N-Term(iTRAQ4plex)                                   | 1825.99687 | 68 | 64  |      | 4.84 | Expt1 |
| AGVLAQLEEER                | 14  | 29336026                                                 | N-Term(iTRAQ4plex)                                   | 1358.74199 | 68 | 74  |      | 3.99 | Expt1 |
| DTDSEEIR                   | 11  | 6753244;149255339;13386230                               | N-Term(iTRAQ4plex)                                   | 1237.56885 | 68 | 73  |      | 3.74 | Expt1 |
| EAEVLLLQQR                 | 28  | 112421039                                                | N-Term(iTRAQ4plex)                                   | 1342.77983 | 68 | 61  |      | 3.90 | Expt1 |
| VFANAYLSDLGGCIK            | 6   | 85861182                                                 | N-Term(iTRAQ4plex), C13(Methylthio), K15(iTRAQ4plex) | 1904.99228 | 68 | 59  |      | 4.66 | Expt1 |
| VSNAQLLLQIDNAR             | 131 | 149262636;118130981                                      | N-Term(iTRAQ4plex), N3(Deamidated)                   | 1699.95073 | 68 | 110 | 1.32 | 6.20 | Expt1 |
| FADLSEANR                  | 15  | 31982755                                                 | N-Term(iTRAQ4plex)                                   | 1237.63152 | 68 | 54  |      | 3.94 | Expt1 |
| TIQAVLTVPK                 | 9   | 117606335                                                | N-Term(iTRAQ4plex), K10(iTRAQ4plex)                  | 1357.87261 | 68 | 80  |      | 3.79 | Expt1 |
| SLADELALVDVLEDK            | 7   | 82998325;6678674                                         | N-Term(iTRAQ4plex), K15(iTRAQ4plex)                  | 1918.06711 | 68 | 73  |      | 4.58 | Expt1 |
| GLDGFQGPSGR                | 9   | 226437587                                                | N-Term(iTRAQ4plex)                                   | 1331.68181 | 68 | 67  |      | 4.11 | Expt1 |
| YGINTTDIFQTVDLWEGK         | 3   | 30519911                                                 | N-Term(iTRAQ4plex), K18(iTRAQ4plex)                  | 2388.23929 | 68 | 64  |      | 5.64 | Expt1 |
| ILMVGLDAAGK                | 17  | 6680722;6680718;6680716;6671571;6680720                  | N-Term(iTRAQ4plex), M3(Oxidation), K11(iTRAQ4plex)   | 1391.82390 | 68 | 76  |      | 3.90 | Expt1 |
| MLTYDPMLLFTGR              | 59  | 31560625                                                 | N-Term(iTRAQ4plex), M1(Oxidation)                    | 1717.87956 | 68 | 78  |      | 4.30 | Expt1 |
| LTPEEEIILNK                | 5   | 149257598;149250154;82922494;28491531;94387984;149264053 | N-Term(iTRAQ4plex), K11(iTRAQ4plex)                  | 1602.88921 | 68 | 61  |      | 4.50 | Expt1 |
| NSYVAGQYDDAASYK            | 3   | 6996917                                                  | N-Term(iTRAQ4plex), K15(iTRAQ4plex)                  | 1939.92459 | 68 | 60  |      | 5.07 | Expt1 |
| FVTVQTISGTGALR             | 26  | 6754036                                                  | N-Term(iTRAQ4plex)                                   | 1593.91277 | 68 | 65  |      | 4.54 | Expt1 |
| LDGNPLTQSSLPDMEYELR        | 30  | 160333372                                                | N-Term(iTRAQ4plex), M15(Oxidation), C18(Methylthio)  | 2455.14629 | 68 | 82  |      | 5.56 | Expt1 |
| VLETAEDIQER                | 6   | 115496850                                                | N-Term(iTRAQ4plex)                                   | 1446.75908 | 67 | 45  |      | 3.74 | Expt1 |
| FNNLSQQVER                 | 8   | 112421039                                                | N-Term(iTRAQ4plex)                                   | 1378.72222 | 67 | 42  |      | 3.70 | Expt1 |
| GFAFVTFESPADAK             | 7   | 6755296;83699420                                         | N-Term(iTRAQ4plex), K14(iTRAQ4plex)                  | 1774.93682 | 67 | 88  |      | 4.69 | Expt1 |
| ILGGVISAISEAAQYNPEPPPPR    | 3   | 110227381                                                | N-Term(iTRAQ4plex)                                   | 2591.40525 | 67 | 98  |      | 5.41 | Expt1 |
| ACLISLGYDVENDR             | 36  | 11230802                                                 | N-Term(iTRAQ4plex), C2(Methylthio)                   | 1757.83501 | 67 | 89  |      | 5.11 | Expt1 |
| VEILAPPNGSVPGDR            | 11  | 126012517                                                | N-Term(iTRAQ4plex), N8(Deamidated)                   | 1665.89458 | 67 | 77  |      | 3.77 | Expt1 |
| LIWDSYTTNK                 | 12  | 13937391;6680045;31542899                                | N-Term(iTRAQ4plex), K11(iTRAQ4plex)                  | 1641.92009 | 67 | 77  |      | 3.78 | Expt1 |
| ALEEANTELEVK               | 6   | 7106335;21489935                                         | N-Term(iTRAQ4plex), K12(iTRAQ4plex)                  | 1633.88896 | 67 | 69  |      | 4.52 | Expt1 |
| GDYSVLVPLGR                | 9   | 124494256                                                | N-Term(iTRAQ4plex)                                   | 1319.74675 | 67 | 41  |      | 3.63 | Expt1 |
| LEIEPEWAYGK                | 3   | 7305061                                                  | N-Term(iTRAQ4plex), K11(iTRAQ4plex)                  | 1622.87187 | 67 | 57  |      | 4.07 | Expt1 |
| TEDELLETSLK                | 3   | 117553604                                                | N-Term(iTRAQ4plex), K11(iTRAQ4plex)                  | 1565.85784 | 67 | 75  |      | 3.90 | Expt1 |
| VVTDTDETELAR               | 11  | 13385624                                                 | N-Term(iTRAQ4plex)                                   | 1492.76152 | 67 | 50  |      | 4.21 | Expt1 |
| GTGGVDTAAVGGVFDVSNADR      | 8   | 10946574                                                 | N-Term(iTRAQ4plex)                                   | 2109.03130 | 67 | 87  |      | 4.68 | Expt1 |
| EIVDTWDESSGSLPVPER         | 6   | 115647999                                                | N-Term(iTRAQ4plex)                                   | 2307.13188 | 67 | 81  |      | 4.82 | Expt1 |
| DAGTIAGLNLVR               | 15  | 31981690                                                 | N-Term(iTRAQ4plex)                                   | 1343.78057 | 67 | 66  |      | 4.47 | Expt1 |
| AVFQANQENLPILK             | 20  | 21450277                                                 | N-Term(iTRAQ4plex), K14(iTRAQ4plex)                  | 1873.08977 | 67 | 74  |      | 5.93 | Expt1 |
| IEQELAAIK                  | 7   | 111074529                                                | N-Term(iTRAQ4plex), K9(iTRAQ4plex)                   | 1302.78740 | 67 | 65  |      | 4.12 | Expt1 |
| GVGQADWTPDLGLR             | 7   | 124486923                                                | N-Term(iTRAQ4plex)                                   | 1628.85234 | 67 | 60  |      | 4.17 | Expt1 |
| IQLGLTVEQAEAVVR            | 14  | 134288917                                                | N-Term(iTRAQ4plex)                                   | 1656.94219 | 67 | 68  |      | 4.12 | Expt1 |
| YFILPDSLPLDILLVDVEPK       | 3   | 6678055;149250230                                        | N-Term(iTRAQ4plex), K20(iTRAQ4plex)                  | 2575.46299 | 67 | 61  |      | 5.60 | Expt1 |
| TVLGVPEVLLGILPGAGGTQR      | 6   | 33859811                                                 | N-Term(iTRAQ4plex)                                   | 2191.29874 | 67 | 53  |      | 4.57 | Expt1 |

|                          |    |                                                                      |                                                                                     |            |    |     |      |       |
|--------------------------|----|----------------------------------------------------------------------|-------------------------------------------------------------------------------------|------------|----|-----|------|-------|
| AVLLQGSNDVELVAEGNSR      | 10 | 111120329                                                            | N-Term(iTRAQ4plex)                                                                  | 2115.11936 | 67 | 85  | 4.86 | Expt1 |
| LLIVSTSPYSEK             | 3  | 6755382                                                              | N-Term(iTRAQ4plex), K12(iTRAQ4plex)                                                 | 1624.94451 | 67 | 64  | 4.25 | Expt1 |
| SAGVSVPGMPGSPGPR         | 78 | 34328108                                                             | N-Term(iTRAQ4plex), M10(Oxidation)                                                  | 1612.82549 | 67 | 70  | 4.62 | Expt1 |
| FYGPEGPYGVFAGR           | 19 | 31980806                                                             | N-Term(iTRAQ4plex)                                                                  | 1660.82927 | 67 | 68  | 4.09 | Expt1 |
| GIDVQVSLVINYLPTNR        | 3  | 176865892;21450625;176866061;226823309;176865998                     | N-Term(iTRAQ4plex)                                                                  | 2288.24443 | 67 | 74  | 5.18 | Expt1 |
| VTWEPAPGEVK              | 25 | 111074529                                                            | N-Term(iTRAQ4plex), K11(iTRAQ4plex)                                                 | 1500.83330 | 67 | 65  | 4.47 | Expt1 |
| FSSYSQMENWSR             | 10 | 9790161                                                              | N-Term(iTRAQ4plex)                                                                  | 1665.74944 | 67 | 70  | 4.48 | Expt1 |
| GLPILVELLR               | 6  | 112363090;147899467;51491821                                         | N-Term(iTRAQ4plex)                                                                  | 1266.82829 | 67 | 52  | 4.06 | Expt1 |
| GASQAGMLAPGTR            | 16 | 149251847;21312564                                                   | N-Term(iTRAQ4plex)                                                                  | 1360.71745 | 67 | 64  | 4.73 | Expt1 |
| VSDATTSTLK               | 3  | 111074529                                                            | N-Term(iTRAQ4plex), K10(iTRAQ4plex)                                                 | 1310.74101 | 67 | 53  | 3.47 | Expt1 |
| MLTAQDVSYDEAR            | 4  | 55926127                                                             | N-Term(iTRAQ4plex)                                                                  | 1642.78362 | 67 | 62  | 4.07 | Expt1 |
| GIFNGFSITLK              | 11 | 149258501;19526818                                                   | N-Term(iTRAQ4plex), N4(Deamidated), K11(iTRAQ4plex)                                 | 1485.85991 | 67 | 64  | 4.13 | Expt1 |
| APEEILAEK                | 3  | 124487013;117553604;162287349;283135142;247269929                    | N-Term(iTRAQ4plex), K9(iTRAQ4plex)                                                  | 1287.75054 | 67 | 60  | 3.88 | Expt1 |
| INVNEIFYDLVR             | 12 | 21704066;149261508                                                   | N-Term(iTRAQ4plex)                                                                  | 1638.89934 | 67 | 75  | 4.73 | Expt1 |
| ITVPFLEQCPIR             | 11 | 6755152                                                              | N-Term(iTRAQ4plex), C9(Methylthio)                                                  | 1605.86516 | 67 | 76  | 3.33 | Expt1 |
| IILGFAPK                 | 5  | 6678499                                                              | N-Term(iTRAQ4plex), K9(iTRAQ4plex)                                                  | 1267.81059 | 67 | 62  | 3.56 | Expt1 |
| DIELVMSQANVSR            | 9  | 41350312;163965357                                                   | N-Term(iTRAQ4plex), M6(Oxidation)                                                   | 1621.83782 | 67 | 71  | 3.65 | Expt1 |
| EVDDLGPVEGDIK            | 3  | 110835723;110835726                                                  | N-Term(iTRAQ4plex), K13(iTRAQ4plex)                                                 | 1673.88750 | 67 | 65  | 4.72 | Expt1 |
| YLVLEADR                 | 4  | 25141235;225007636;6753620;14861844;33859536                         | N-Term(iTRAQ4plex)                                                                  | 1237.65593 | 67 | 44  |      | Expt1 |
| VLEQLTGQTPVFSK           | 20 | 13385408;149251925;38082564;149269674                                | N-Term(iTRAQ4plex), K14(iTRAQ4plex)                                                 | 1835.05730 | 67 | 99  | 5.52 | Expt1 |
| LIGNMALLPLR              | 9  | 9790141                                                              | N-Term(iTRAQ4plex)                                                                  | 1354.84001 | 67 | 57  | 4.39 | Expt1 |
| LFVLQTVQQAASK            | 5  | 31980632                                                             | N-Term(iTRAQ4plex), K12(iTRAQ4plex)                                                 | 1649.98967 | 67 | 101 | 4.37 | Expt1 |
| TGQATVAGSIPAGWMLDCGTESSK | 3  | 70778976                                                             | N-Term(iTRAQ4plex), C19(Methylthio), K25(iTRAQ4plex)                                | 2758.32090 | 67 | 69  | 5.71 | Expt1 |
| GILAADESVMGMAK           | 3  | 60687506                                                             | N-Term(iTRAQ4plex), K14(iTRAQ4plex)                                                 | 1636.88017 | 67 | 84  | 4.58 | Expt1 |
| LQNDPQLAEAYR             | 13 | 112421039                                                            | N-Term(iTRAQ4plex)                                                                  | 1619.81767 | 67 | 63  | 4.15 | Expt1 |
| ELPQSIYVK                | 6  | 149261823;164607147                                                  | N-Term(iTRAQ4plex), K9(iTRAQ4plex)                                                  | 1364.80242 | 67 | 66  | 3.54 | Expt1 |
| DLFEDELVPLFEK            | 12 | 114145493;29788787                                                   | N-Term(iTRAQ4plex), K13(iTRAQ4plex)                                                 | 1882.01152 | 67 | 82  | 4.90 | Expt1 |
| AVLVLEPGTMDSVR           | 24 | 31981939;22165384                                                    | N-Term(iTRAQ4plex), M11(Oxidation)                                                  | 1761.92009 | 67 | 72  | 4.18 | Expt1 |
| LIPDGCYVK                | 2  | 149249582;149250101;149250358;149259021;82931053                     | N-Term(iTRAQ4plex), C6(Methylthio), K9(iTRAQ4plex)                                  | 1235.66777 | 67 | 56  |      | Expt1 |
| LVTEFLEK                 | 28 | 31560625                                                             | N-Term(iTRAQ4plex), K8(iTRAQ4plex)                                                  | 1266.76018 | 67 | 67  | 3.78 | Expt1 |
| VEFMDDTSR                | 22 | 149255324;149248869;149251798;149253028;82895184;149254364;149257368 | N-Term(iTRAQ4plex)                                                                  | 1243.57598 | 67 | 40  | 3.44 | Expt1 |
| LYIGLAGLATDVQTVQQR       | 10 | 6755202                                                              | N-Term(iTRAQ4plex)                                                                  | 2033.15934 | 67 | 97  | 5.54 | Expt1 |
| EEYSGVIEEFLATGEK         | 7  | 227499103                                                            | N-Term(iTRAQ4plex), K16(iTRAQ4plex)                                                 | 2089.06473 | 67 | 54  | 4.20 | Expt1 |
| CDACPVGFTGPMVQGVGINFAK   | 7  | 6755781                                                              | C1(Methylthio), N-Term(iTRAQ4plex), C4(Methylthio), M12(Oxidation), K22(iTRAQ4plex) | 2607.22062 | 67 | 72  | 3.91 | Expt1 |
| IGGIGTVPVGR              | 54 | 126032329;6681273                                                    | N-Term(iTRAQ4plex)                                                                  | 1169.71489 | 67 | 65  | 3.77 | Expt1 |
| QLVEQVEIQIK              | 3  | 145966911                                                            | N-Term(iTRAQ4plex), K11(iTRAQ4plex)                                                 | 1629.94846 | 67 | 45  | 4.50 | Expt1 |
| DAGVIAGLNLVR             | 73 | 124339838;124339829;124339826                                        | N-Term(iTRAQ4plex)                                                                  | 1341.79456 | 67 | 77  | 4.89 | Expt1 |
| IPSAVGYQPTLATDMGMTQER    | 28 | 31980648                                                             | N-Term(iTRAQ4plex), M15(Oxidation)                                                  | 2426.18552 | 66 | 84  | 6.20 | Expt1 |
| LVAYYTLIGASQR            | 11 | 126518317                                                            | N-Term(iTRAQ4plex)                                                                  | 1655.92693 | 66 | 73  | 3.97 | Expt1 |
| GAQAIVVYDITNQETFAR       | 8  | 28916687;149249575                                                   | N-Term(iTRAQ4plex)                                                                  | 2211.15763 | 66 | 63  | 5.77 | Expt1 |
| AILNYIATK                | 3  | 149259801;149260087;169808401;50263046;154350202                     | N-Term(iTRAQ4plex), K9(iTRAQ4plex)                                                  | 1294.80425 | 66 | 60  | 3.69 | Expt1 |
| QTQVSVLPEGGETPLFK        | 23 | 28916693                                                             | N-Term(iTRAQ4plex), K17(iTRAQ4plex)                                                 | 2118.17583 | 66 | 58  | 4.57 | Expt1 |
| ATENDIYNFFSPLNPMR        | 6  | 9845253                                                              | N-Term(iTRAQ4plex)                                                                  | 2173.06070 | 66 | 52  | 5.25 | Expt1 |
| AIGAVPLIQGEYMIPCEK       | 10 | 6753556                                                              | N-Term(iTRAQ4plex), C16(Methylthio), K18(iTRAQ4plex)                                | 2266.19455 | 66 | 68  | 1.48 | Expt1 |
| CDLEIQANGR               | 15 | 6678329                                                              | N-Term(iTRAQ4plex), C1(Methylthio), N8(Deamidated)                                  | 1309.60137 | 66 | 66  | 4.10 | Expt1 |
| SQSAAVTPSSSTSSAR         | 3  | 149251337;149251339;31981027                                         | N-Term(iTRAQ4plex)                                                                  | 1667.83586 | 66 | 56  | 3.91 | Expt1 |



|                         |     |                                                                                                                                                                                    |                                                                                                     |            |    |     |      |      |       |
|-------------------------|-----|------------------------------------------------------------------------------------------------------------------------------------------------------------------------------------|-----------------------------------------------------------------------------------------------------|------------|----|-----|------|------|-------|
| FEDGLTLYQSNAILR         | 13  | 149246605;32401425;10092608                                                                                                                                                        | N-Term(iTRAQ4plex)                                                                                  | 1999.02921 | 66 | 75  |      | 4.56 | Expt1 |
| QITINDLPVGR             | 64  | 7948999;6754976                                                                                                                                                                    | N-Term(iTRAQ4plex)                                                                                  | 1369.79338 | 66 | 57  |      | 4.16 | Expt1 |
| VNIPIIAK                | 22  | 57634518;28173550;226442740;67906175;160333377;39930477                                                                                                                            | N-Term(iTRAQ4plex), K9(iTRAQ4plex)                                                                  | 1268.85076 | 66 | 48  |      | 3.29 | Expt1 |
| ETCGCCDCEK              | 17  | 22203747                                                                                                                                                                           | N-Term(iTRAQ4plex), C3(Methylthio), C5(Methylthio), C6(Methylthio), C8(Methylthio), K10(iTRAQ4plex) | 1562.48320 | 66 | 69  |      | 3.92 | Expt1 |
| MINLSVPDTIDER           | 12  | 21704120;262050551;31543113                                                                                                                                                        | N-Term(iTRAQ4plex)                                                                                  | 1646.85796 | 66 | 67  |      | 4.11 | Expt1 |
| TIPIDGFFSYTR            | 14  | 6753036                                                                                                                                                                            | N-Term(iTRAQ4plex)                                                                                  | 1675.85076 | 66 | 61  |      | 3.86 | Expt1 |
| AAVFGVYDTAK             | 3   | 148747424                                                                                                                                                                          | N-Term(iTRAQ4plex), K11(iTRAQ4plex)                                                                 | 1493.78801 | 66 | 61  |      | 4.75 | Expt1 |
| GCLTEQTYPEVVR           | 6   | 33859660                                                                                                                                                                           | N-Term(iTRAQ4plex), C2(Methylthio)                                                                  | 1684.81670 | 66 | 87  |      | 4.46 | Expt1 |
| VIQCAETGQVQK            | 7   | 51491845                                                                                                                                                                           | N-Term(iTRAQ4plex), C4(Methylthio), K13(iTRAQ4plex)                                                 | 1784.93230 | 66 | 80  |      | 5.05 | Expt1 |
| FSPNSSNPIIVSCGWDK       | 5   | 6680047                                                                                                                                                                            | N-Term(iTRAQ4plex), C13(Methylthio), K17(iTRAQ4plex)                                                | 2185.07096 | 66 | 49  |      | 4.56 | Expt1 |
| QITVNDLPVGR             | 24  | 148747558                                                                                                                                                                          | N-Term(iTRAQ4plex)                                                                                  | 1355.77947 | 66 | 52  |      | 3.86 | Expt1 |
| EYQELMNTK               | 29  | 20911031                                                                                                                                                                           | N-Term(iTRAQ4plex), K9(iTRAQ4plex)                                                                  | 1443.74211 | 66 | 63  |      | 4.07 | Expt1 |
| FEDENFILK               | 43  | 149257773;149268842;149269448;6679439                                                                                                                                              | N-Term(iTRAQ4plex), K9(iTRAQ4plex)                                                                  | 1442.78288 | 66 | 65  |      | 3.87 | Expt1 |
| ISWAMEDSLER             | 3   | 22122427                                                                                                                                                                           | N-Term(iTRAQ4plex)                                                                                  | 1595.75163 | 66 | 53  |      | 4.06 | Expt1 |
| FVGINASDINYSAGR         | 3   | 31559926                                                                                                                                                                           | N-Term(iTRAQ4plex)                                                                                  | 1727.88738 | 66 | 62  |      | 4.33 | Expt1 |
| SIPLDEGEDEAQR           | 3   | 134288917                                                                                                                                                                          | N-Term(iTRAQ4plex)                                                                                  | 1602.77287 | 66 | 49  |      | 3.55 | Expt1 |
| QIGDNLIVPGGVK           | 3   | 209862992;6681219                                                                                                                                                                  | N-Term(iTRAQ4plex), K13(iTRAQ4plex)                                                                 | 1597.96025 | 66 | 85  |      | 4.92 | Expt1 |
| AVSSFFSGSCVPCADPVAFPK   | 5   | 20330802                                                                                                                                                                           | N-Term(iTRAQ4plex), C10(Methylthio), C13(Methylthio), K21(iTRAQ4plex)                               | 2496.16509 | 66 | 73  |      | 5.20 | Expt1 |
| MLDNDLSILVDAIR          | 3   | 22122717                                                                                                                                                                           | N-Term(iTRAQ4plex)                                                                                  | 1618.86125 | 66 | 66  |      | 4.25 | Expt1 |
| TVQIEASTVEIEER          | 9   | 6754816;228480253                                                                                                                                                                  | N-Term(iTRAQ4plex)                                                                                  | 1747.92461 | 66 | 65  |      | 4.89 | Expt1 |
| IQLLEEELDR              | 5   | 47894398                                                                                                                                                                           | N-Term(iTRAQ4plex)                                                                                  | 1401.77312 | 66 | 53  |      | 4.09 | Expt1 |
| GDWSQFTLWQQGR           | 3   | 125628659                                                                                                                                                                          | N-Term(iTRAQ4plex)                                                                                  | 1752.86150 | 66 | 71  |      | 3.98 | Expt1 |
| VLSEEEIDDNFK            | 3   | 160333229                                                                                                                                                                          | N-Term(iTRAQ4plex), K12(iTRAQ4plex)                                                                 | 1725.88213 | 66 | 100 |      | 4.11 | Expt1 |
| GELVPLDTVLDMLR          | 5   | 10946936                                                                                                                                                                           | N-Term(iTRAQ4plex)                                                                                  | 1714.96037 | 66 | 79  |      | 4.20 | Expt1 |
| GPGLGSTQGQTIALPAQGLIEFR | 17  | 149269973;149269975;149269977                                                                                                                                                      | N-Term(iTRAQ4plex)                                                                                  | 2455.34909 | 66 | 79  |      | 5.63 | Expt1 |
| AGYTDQVVIGMVAASEFYR     | 12  | 149253386                                                                                                                                                                          | N-Term(iTRAQ4plex)                                                                                  | 2336.14165 | 66 | 84  |      | 5.66 | Expt1 |
| TLVLLDNLNVR             | 13  | 46195798                                                                                                                                                                           | N-Term(iTRAQ4plex)                                                                                  | 1413.85661 | 66 | 60  |      | 3.91 | Expt1 |
| LAPEYEAATR              | 14  | 112293264                                                                                                                                                                          | N-Term(iTRAQ4plex)                                                                                  | 1335.70305 | 66 | 53  |      | 3.64 | Expt1 |
| SYSYDMLSEIK             | 16  | 149260099;6996913                                                                                                                                                                  | N-Term(iTRAQ4plex), M7(Oxidation), K12(iTRAQ4plex)                                                  | 1736.87041 | 66 | 99  |      | 3.87 | Expt1 |
| ILQQDWSDLMPDPAGVR       | 6   | 111185907                                                                                                                                                                          | N-Term(iTRAQ4plex)                                                                                  | 2085.06108 | 66 | 71  |      | 5.32 | Expt1 |
| EQWANLEQLSAIR           | 4   | 117938332;117938334                                                                                                                                                                | N-Term(iTRAQ4plex)                                                                                  | 1701.91033 | 66 | 46  |      | 3.90 | Expt1 |
| QTVEADINGLR             | 177 | 118130981                                                                                                                                                                          | N-Term(iTRAQ4plex), N8(Deamidated)                                                                  | 1360.71860 | 66 | 70  |      | 4.65 | Expt1 |
| SMEAEMIQLEELAAER        | 10  | 114326446                                                                                                                                                                          | N-Term(iTRAQ4plex), M2(Oxidation), M6(Oxidation)                                                    | 2225.05991 | 66 | 65  | 1.22 | 5.85 | Expt1 |
| QMGFPLIYVEAEQVEDDR      | 6   | 68226731                                                                                                                                                                           | N-Term(iTRAQ4plex)                                                                                  | 2283.11313 | 66 | 85  |      | 5.29 | Expt1 |
| GTVTDFFPGFDGR           | 48  | 6753060                                                                                                                                                                            | N-Term(iTRAQ4plex)                                                                                  | 1412.69328 | 66 | 73  |      | 4.51 | Expt1 |
| ALDVNVALR               | 3   | 149260240                                                                                                                                                                          | N-Term(iTRAQ4plex)                                                                                  | 1114.67290 | 66 | 47  |      | 3.17 | Expt1 |
| AMGNLQIDFADPQR          | 5   | 94410730;41054806                                                                                                                                                                  | N-Term(iTRAQ4plex)                                                                                  | 1719.86003 | 66 | 83  |      | 4.59 | Expt1 |
| ADVQSIIGLQR             | 8   | 170295840                                                                                                                                                                          | N-Term(iTRAQ4plex)                                                                                  | 1343.77825 | 66 | 54  |      | 3.83 | Expt1 |
| APPVPGAVSGSGVEDELFDVK   | 2   | 10946972                                                                                                                                                                           | N-Term(iTRAQ4plex), K22(iTRAQ4plex)                                                                 | 2415.26419 | 66 | 47  |      |      | Expt1 |
| WGTLTDCVVMR             | 23  | 82801284;94371439;149252089;82918363;82918359;82954743;149266199;82954739;149266543;149266545;82956957;51769129;149266569;82957137;94400765;149268214;149268216;37674277;157277969 | N-Term(iTRAQ4plex), C7(Methylthio)                                                                  | 1470.70720 | 66 | 55  |      | 4.17 | Expt1 |
| SQAVTQLEAAILQEK         | 19  | 111185907                                                                                                                                                                          | N-Term(iTRAQ4plex), K15(iTRAQ4plex)                                                                 | 1917.09848 | 65 | 65  |      | 5.41 | Expt1 |
| MLAEELR                 | 15  | 6680718;6680716;6671571                                                                                                                                                            | N-Term(iTRAQ4plex)                                                                                  | 1120.58049 | 65 | 54  |      | 3.30 | Expt1 |
| SQCTQVVQER              | 15  | 82950147;82950149;149264086                                                                                                                                                        | N-Term(iTRAQ4plex), C3(Methylthio)                                                                  | 1367.65422 | 65 | 56  |      | 4.31 | Expt1 |

|                          |    |                                                                                   |                                                      |            |    |     |      |      |       |
|--------------------------|----|-----------------------------------------------------------------------------------|------------------------------------------------------|------------|----|-----|------|------|-------|
| GGDLMA YDR               | 18 | 13384620                                                                          | N-Term(iTRAQ4plex)                                   | 1141.54375 | 65 | 59  |      | 3.77 | Expt1 |
| DVYTGDALR                | 6  | 7242197                                                                           | N-Term(iTRAQ4plex)                                   | 1153.59856 | 65 | 48  |      |      | Expt1 |
| LAQAEEQLEQESR            | 18 | 29336026                                                                          | N-Term(iTRAQ4plex)                                   | 1674.84282 | 65 | 75  |      | 4.79 | Expt1 |
| ILAATIDNSR               | 28 | 226823220                                                                         | N-Term(iTRAQ4plex)                                   | 1217.69866 | 65 | 70  |      | 3.64 | Expt1 |
| SQECDWEEISVK             | 3  | 112421039                                                                         | N-Term(iTRAQ4plex), C4(Methylthio), K12(iTRAQ4plex)  | 1786.82756 | 65 | 90  |      | 4.56 | Expt1 |
| ATGVFTTLQPLR             | 21 | 46849812                                                                          | N-Term(iTRAQ4plex)                                   | 1447.84136 | 65 | 65  |      | 4.61 | Expt1 |
| YGIQMPAFSK               | 4  | 118344444;242332572                                                               | N-Term(iTRAQ4plex), K10(iTRAQ4plex)                  | 1429.78618 | 65 | 73  |      | 3.85 | Expt1 |
| DVEAWFFSK                | 10 | 226823220                                                                         | N-Term(iTRAQ4plex), K9(iTRAQ4plex)                   | 1416.74919 | 65 | 55  |      | 4.10 | Expt1 |
| VINLIDSK                 | 46 | 163310769                                                                         | N-Term(iTRAQ4plex), K8(iTRAQ4plex)                   | 1189.74834 | 65 | 57  |      | 3.39 | Expt1 |
| GFGVFLFK                 | 16 | 51776221;116256518;116256514;116256516;148664250;116256512                        | N-Term(iTRAQ4plex), K8(iTRAQ4plex)                   | 1202.72893 | 65 | 54  |      | 3.61 | Expt1 |
| AVDSLVP IGR              | 27 | 6680748                                                                           | N-Term(iTRAQ4plex)                                   | 1170.69829 | 65 | 54  |      | 3.67 | Expt1 |
| GISPVINLR                | 9  | 87299637;116063570                                                                | N-Term(iTRAQ4plex)                                   | 1209.74272 | 65 | 48  |      | 3.00 | Expt1 |
| GPLDFEFGPDAK             | 3  | 61743961                                                                          | N-Term(iTRAQ4plex), K12(iTRAQ4plex)                  | 1490.77373 | 65 | 51  |      | 4.15 | Expt1 |
| EVDYLETQNPALPCVELDEK     | 8  | 86439989                                                                          | N-Term(iTRAQ4plex), C14(Methylthio), K20(iTRAQ4plex) | 2639.28496 | 65 | 74  |      | 4.40 | Expt1 |
| IMVDMLDEGSGK             | 7  | 157951598                                                                         | N-Term(iTRAQ4plex), K13(iTRAQ4plex)                  | 1697.84087 | 65 | 94  |      | 4.55 | Expt1 |
| EAAQMDMVDNGVEDLR         | 10 | 10092608                                                                          | N-Term(iTRAQ4plex), M7(Oxidation)                    | 1952.88005 | 65 | 73  |      | 4.38 | Expt1 |
| NLLSVAYK                 | 12 | 226874906;31543976;149263879;149269348;134023662;6756037;6756041;6756039;31543974 | N-Term(iTRAQ4plex), K8(iTRAQ4plex)                   | 1195.73345 | 65 | 43  |      | 3.36 | Expt1 |
| ASGIIDTLFQDR             | 14 | 149266012;214010170                                                               | N-Term(iTRAQ4plex)                                   | 1479.79741 | 65 | 75  |      | 4.24 | Expt1 |
| LFELEEQLFR               | 6  | 55742711                                                                          | N-Term(iTRAQ4plex)                                   | 1582.82866 | 65 | 41  |      | 4.13 | Expt1 |
| TTGFGMIYDSL DYAK         | 15 | 46519156;46519160;149267855;149271781                                             | N-Term(iTRAQ4plex), K15(iTRAQ4plex)                  | 1969.98540 | 65 | 103 |      | 4.90 | Expt1 |
| SELVANNVTLPAGEQR         | 12 | 121949767;121949779;121949760;121949763;121949765;121949769                       | N-Term(iTRAQ4plex)                                   | 1841.98174 | 65 | 100 |      | 5.43 | Expt1 |
| FYPEDVAEELIQDITQK        | 8  | 149266483                                                                         | N-Term(iTRAQ4plex), K17(iTRAQ4plex)                  | 2326.21611 | 65 | 79  |      | 5.05 | Expt1 |
| INVNVNSAAGLLDQFYEK       | 6  | 21703702                                                                          | N-Term(iTRAQ4plex), K18(iTRAQ4plex)                  | 2283.23233 | 65 | 73  |      | 5.92 | Expt1 |
| EAINLLEPMTNDPVNYVR       | 3  | 74315975                                                                          | N-Term(iTRAQ4plex), M9(Oxidation)                    | 2248.14273 | 65 | 66  |      | 4.69 | Expt1 |
| VNVDIINFGE EEVNTEK       | 5  | 6679505                                                                           | N-Term(iTRAQ4plex), K17(iTRAQ4plex)                  | 2237.15970 | 65 | 59  |      | 4.47 | Expt1 |
| LLQSGNSDVVR              | 12 | 9790161                                                                           | N-Term(iTRAQ4plex)                                   | 1331.73943 | 65 | 65  |      | 3.86 | Expt1 |
| GEGPEVDVSLPNADLDVSGPK    | 12 | 61743961                                                                          | N-Term(iTRAQ4plex), K21(iTRAQ4plex)                  | 2383.22477 | 65 | 57  |      | 5.20 | Expt1 |
| VGWEQLLTIAR              | 31 | 61097906;11230802                                                                 | N-Term(iTRAQ4plex)                                   | 1530.88042 | 65 | 77  |      | 5.20 | Expt1 |
| LTVDNAVAR                | 6  | 82950147;82950149;149264086                                                       | N-Term(iTRAQ4plex)                                   | 1102.63457 | 65 | 53  |      | 3.79 | Expt1 |
| ILMVGLDAAGK              | 19 | 6680722;6680718;6680716;6671571;6680720                                           | N-Term(iTRAQ4plex), K11(iTRAQ4plex)                  | 1375.83110 | 65 | 76  |      | 4.43 | Expt1 |
| VVLEIDNAR                | 15 | 226823220                                                                         | N-Term(iTRAQ4plex)                                   | 1172.67681 | 65 | 43  |      | 3.41 | Expt1 |
| NMGGPYGGNGYGP GSGSGGYGGR | 7  | 149274531;32880197;109134362                                                      | N-Term(iTRAQ4plex), M2(Oxidation)                    | 2350.00980 | 65 | 71  |      | 5.46 | Expt1 |
| DTCFSTEGPNLVTR           | 5  | 163310765                                                                         | N-Term(iTRAQ4plex), C3(Methylthio)                   | 1729.80559 | 65 | 51  |      | 4.70 | Expt1 |
| TIEYLQPNPASR             | 6  | 31560792;7305485                                                                  | N-Term(iTRAQ4plex)                                   | 1532.82109 | 65 | 61  |      | 4.05 | Expt1 |
| AITGFDDPFSGK             | 5  | 82950147;82950149;149264086                                                       | N-Term(iTRAQ4plex), K12(iTRAQ4plex)                  | 1542.80901 | 65 | 81  |      | 4.50 | Expt1 |
| SLYYIIQDDTK              | 62 | 6996913                                                                           | N-Term(iTRAQ4plex), K11(iTRAQ4plex)                  | 1709.90520 | 65 | 77  | 1.22 | 5.08 | Expt1 |
| ALEQFLQEYFDGNLK          | 13 | 112293264                                                                         | N-Term(iTRAQ4plex), K15(iTRAQ4plex)                  | 2103.10782 | 65 | 61  |      | 5.62 | Expt1 |
| QVLLSEPEAAALYR           | 5  | 214010153                                                                         | N-Term(iTRAQ4plex)                                   | 1832.00749 | 65 | 81  |      | 4.32 | Expt1 |
| VVIDVPDVNIEGPDTK         | 16 | 61743961                                                                          | N-Term(iTRAQ4plex), K16(iTRAQ4plex)                  | 2014.06035 | 65 | 77  |      | 4.63 | Expt1 |
| VPLDVIFK                 | 5  | 31543108;63054837                                                                 | N-Term(iTRAQ4plex), K8(iTRAQ4plex)                   | 1218.77019 | 65 | 51  |      | 3.02 | Expt1 |
| TPEELSAIK                | 3  | 6753060                                                                           | N-Term(iTRAQ4plex), K9(iTRAQ4plex)                   | 1275.74614 | 65 | 49  |      | 3.50 | Expt1 |
| QPAIMPQSYGLE DGSCSYK     | 5  | 183980004                                                                         | N-Term(iTRAQ4plex), C17(Methylthio), K20(iTRAQ4plex) | 2465.14414 | 65 | 86  |      | 5.22 | Expt1 |
| AADAEAEVASLNR            | 15 | 40254525                                                                          | N-Term(iTRAQ4plex)                                   | 1460.74761 | 65 | 55  |      | 3.86 | Expt1 |
| SFGPAVMNRR               | 71 | 149267092;6857757                                                                 | N-Term(iTRAQ4plex)                                   | 1221.65393 | 65 | 78  |      | 4.01 | Expt1 |
| DLYLENPEIK               | 22 | 6678329                                                                           | N-Term(iTRAQ4plex), K10(iTRAQ4plex)                  | 1521.84392 | 65 | 60  |      | 4.77 | Expt1 |

|                           |    |                                                                                                                                                |                                                                      |            |    |     |      |      |       |
|---------------------------|----|------------------------------------------------------------------------------------------------------------------------------------------------|----------------------------------------------------------------------|------------|----|-----|------|------|-------|
| TCTTVFTQVNSEDK            | 5  | 149250878;149253661;82904025;149256849;149257810;149258982;94385930;149259749;149260113;94386298;82930638;82953577;63663484;82956648;149268884 | N-Term(iTRAQ4plex), C2(Methylthio), K15(iTRAQ4plex)                  | 1977.94682 | 65 | 84  |      | 5.15 | Expt1 |
| TCTTVFTQVNSENK            | 5  | 82949769                                                                                                                                       | N-Term(iTRAQ4plex), C2(Methylthio), N14(Deamidated), K15(iTRAQ4plex) | 1977.94682 | 65 | 84  |      | 5.15 | Expt1 |
| SQVFSTAADGQTQVEIK         | 4  | 162461907                                                                                                                                      | N-Term(iTRAQ4plex), K17(iTRAQ4plex)                                  | 2097.10796 | 65 | 104 |      | 5.60 | Expt1 |
| EYFGFGVEVIESIELPMDNK      | 4  | 116256518;116256514;116256516;116256512                                                                                                        | N-Term(iTRAQ4plex), K19(iTRAQ4plex)                                  | 2449.19199 | 65 | 53  |      | 5.47 | Expt1 |
| GYEASVDLTFGAVTGPDPSEEAGTK | 7  | 6678329                                                                                                                                        | N-Term(iTRAQ4plex), K26(iTRAQ4plex)                                  | 2873.38652 | 65 | 76  |      | 7.10 | Expt1 |
| SSPVIIDASTAIDAPSNLR       | 17 | 46849812                                                                                                                                       | N-Term(iTRAQ4plex)                                                   | 2071.11919 | 65 | 75  |      | 5.03 | Expt1 |
| VLPMTGVEAGETACK           | 8  | 8393866                                                                                                                                        | N-Term(iTRAQ4plex), C15(Methylthio), K16(iTRAQ4plex)                 | 1953.97519 | 64 | 68  |      | 6.46 | Expt1 |
| SATFQIQSFIVICSPVWTSR      | 3  | 111074529                                                                                                                                      | N-Term(iTRAQ4plex), C13(Methylthio)                                  | 2462.20090 | 64 | 58  |      | 5.75 | Expt1 |
| NPNPGYPYTLK               | 3  | 183980004                                                                                                                                      | N-Term(iTRAQ4plex), N3(Deamidated), K11(iTRAQ4plex)                  | 1552.82781 | 64 | 50  |      | 3.35 | Expt1 |
| ELETQISELQEDLESER         | 16 | 114326446                                                                                                                                      | N-Term(iTRAQ4plex)                                                   | 2192.07492 | 64 | 72  |      | 5.09 | Expt1 |
| VANVSLALYK                | 12 | 149250977;94363969                                                                                                                             | N-Term(iTRAQ4plex), K11(iTRAQ4plex)                                  | 1478.92729 | 64 | 76  |      | 4.82 | Expt1 |
| EQGFLSFWR                 | 5  | 148747424                                                                                                                                      | N-Term(iTRAQ4plex)                                                   | 1313.67815 | 64 | 50  |      | 3.57 | Expt1 |
| IIQLDDYPK                 | 17 | 94369748;94383772;6671569                                                                                                                      | N-Term(iTRAQ4plex), K10(iTRAQ4plex)                                  | 1505.88957 | 64 | 77  |      | 4.51 | Expt1 |
| ETVVTSTTEPSR              | 13 | 6679465                                                                                                                                        | N-Term(iTRAQ4plex)                                                   | 1450.75115 | 64 | 64  |      | 3.71 | Expt1 |
| STGGAPTFNVTVTMTAK         | 16 | 6755040                                                                                                                                        | N-Term(iTRAQ4plex), K17(iTRAQ4plex)                                  | 1971.05010 | 64 | 87  |      | 4.83 | Expt1 |
| DTNGSQFFITTVK             | 9  | 71774133                                                                                                                                       | N-Term(iTRAQ4plex), N3(Deamidated), K13(iTRAQ4plex)                  | 1746.92107 | 64 | 73  |      | 4.65 | Expt1 |
| ITPENLPQILLQLK            | 3  | 25141233                                                                                                                                       | N-Term(iTRAQ4plex), K14(iTRAQ4plex)                                  | 1908.18235 | 64 | 45  |      | 4.11 | Expt1 |
| AVANQTSATFLR              | 8  | 6679501                                                                                                                                        | N-Term(iTRAQ4plex)                                                   | 1422.78533 | 64 | 61  |      | 4.49 | Expt1 |
| LQSIGTENTEENR             | 7  | 6671539                                                                                                                                        | N-Term(iTRAQ4plex)                                                   | 1634.81365 | 64 | 73  |      | 4.59 | Expt1 |
| SGSLSLTQFADMISLK          | 13 | 82950147;82950149;149264086                                                                                                                    | N-Term(iTRAQ4plex), M12(Oxidation), K16(iTRAQ4plex)                  | 2002.08769 | 64 | 74  |      | 4.80 | Expt1 |
| ELGQDGEEAEPAGAGDGPPR      | 3  | 114052414                                                                                                                                      | N-Term(iTRAQ4plex)                                                   | 2095.96514 | 64 | 97  |      | 4.90 | Expt1 |
| AEEYEFLTPMEEAPK           | 27 | 31982030                                                                                                                                       | N-Term(iTRAQ4plex), K15(iTRAQ4plex)                                  | 2072.01592 | 64 | 75  | 1.23 | 5.05 | Expt1 |
| SVPMPVPGIK                | 23 | 160333372                                                                                                                                      | N-Term(iTRAQ4plex), M4(Oxidation), K10(iTRAQ4plex)                   | 1328.79460 | 64 | 55  |      | 3.44 | Expt1 |
| GQFSTDELVAEVEK            | 6  | 51491845                                                                                                                                       | N-Term(iTRAQ4plex), K14(iTRAQ4plex)                                  | 1839.96018 | 64 | 64  |      | 4.76 | Expt1 |
| LTVVDTPGYGDAINCR          | 6  | 6754816;228480253                                                                                                                              | N-Term(iTRAQ4plex), C15(Methylthio)                                  | 1883.91098 | 64 | 59  |      | 4.67 | Expt1 |
| TPSAAYLWVGAGASEAEK        | 11 | 28916693                                                                                                                                       | N-Term(iTRAQ4plex), K18(iTRAQ4plex)                                  | 2096.09990 | 64 | 101 |      | 5.04 | Expt1 |
| GTPEPGPLGATDER            | 9  | 161016822;161016820                                                                                                                            | N-Term(iTRAQ4plex)                                                   | 1540.77068 | 64 | 86  |      | 4.19 | Expt1 |
| LCYVALDFEQEMATAASSSSLEK   | 6  | 6671509;6752954                                                                                                                                | N-Term(iTRAQ4plex), C2(Methylthio), K23(iTRAQ4plex)                  | 2827.35390 | 64 | 78  |      | 5.71 | Expt1 |
| FDDAVVQSDMK               | 5  | 31981690                                                                                                                                       | N-Term(iTRAQ4plex), K11(iTRAQ4plex)                                  | 1542.77410 | 64 | 69  |      | 3.86 | Expt1 |
| IEENTLNAELLR              | 6  | 110625833                                                                                                                                      | N-Term(iTRAQ4plex)                                                   | 1558.86064 | 64 | 50  |      | 4.56 | Expt1 |
| YDSVSVFNGAVSDDSK          | 10 | 125490382                                                                                                                                      | N-Term(iTRAQ4plex), N8(Deamidated), K16(iTRAQ4plex)                  | 1978.95366 | 64 | 117 |      | 5.06 | Expt1 |
| TDDYLDQPC CETINR          | 7  | 116089273                                                                                                                                      | N-Term(iTRAQ4plex), C9(Methylthio), C10(Methylthio)                  | 2021.81780 | 64 | 72  |      | 4.52 | Expt1 |
| EASMVITESPAALQLR          | 5  | 7710018                                                                                                                                        | N-Term(iTRAQ4plex)                                                   | 1860.00786 | 64 | 75  |      | 4.37 | Expt1 |
| WDPAPGPVQYR               | 78 | 111074529                                                                                                                                      | N-Term(iTRAQ4plex)                                                   | 1557.79282 | 64 | 53  |      | 5.19 | Expt1 |
| ILGDPEARL                 | 31 | 6678321                                                                                                                                        | N-Term(iTRAQ4plex)                                                   | 1127.65618 | 64 | 50  |      | 3.56 | Expt1 |
| GLLSQGSPLSWEETQR          | 2  | 33468897                                                                                                                                       | N-Term(iTRAQ4plex)                                                   | 1931.99687 | 64 | 109 |      |      | Expt1 |
| EPLLTLVK                  | 6  | 149260701;19882201                                                                                                                             | N-Term(iTRAQ4plex), K8(iTRAQ4plex)                                   | 1200.78874 | 64 | 54  |      | 3.48 | Expt1 |
| TLTPIIQEYFEHGDNEVAEMLR    | 3  | 110625656;270309161                                                                                                                            | N-Term(iTRAQ4plex)                                                   | 2850.41819 | 64 | 54  |      | 5.77 | Expt1 |
| EVIELPLNPELFQR            | 18 | 27754103                                                                                                                                       | N-Term(iTRAQ4plex)                                                   | 1942.07891 | 64 | 81  |      | 4.80 | Expt1 |
| VIDPATATSDLR              | 13 | 6753322                                                                                                                                        | N-Term(iTRAQ4plex)                                                   | 1501.83782 | 64 | 91  |      | 3.91 | Expt1 |
| TLPVVFDSPR                | 12 | 156938252;156938255                                                                                                                            | N-Term(iTRAQ4plex)                                                   | 1274.72417 | 64 | 68  |      | 3.10 | Expt1 |
| LVLCEVFK                  | 20 | 149269782;31982332                                                                                                                             | N-Term(iTRAQ4plex), C4(Methylthio), K8(iTRAQ4plex)                   | 1284.73686 | 64 | 67  |      | 3.54 | Expt1 |
| AVAQALEVIPR               | 15 | 6753320                                                                                                                                        | N-Term(iTRAQ4plex)                                                   | 1310.79302 | 64 | 67  |      | 4.39 | Expt1 |
| YIATPIFSK                 | 15 | 6754084                                                                                                                                        | N-Term(iTRAQ4plex), K9(iTRAQ4plex)                                   | 1327.79009 | 64 | 66  |      | 3.61 | Expt1 |
| GVTIASGGVLPR              | 15 | 46250738                                                                                                                                       | N-Term(iTRAQ4plex)                                                   | 1270.76055 | 64 | 57  |      | 3.66 | Expt1 |
| LVILEGELK                 | 3  | 47894398                                                                                                                                       | N-Term(iTRAQ4plex), K9(iTRAQ4plex)                                   | 1301.82976 | 64 | 54  |      | 2.96 | Expt1 |
| WLLDFASK                  | 3  | 31560705                                                                                                                                       | N-Term(iTRAQ4plex), K8(iTRAQ4plex)                                   | 1267.73699 | 64 | 53  |      | 3.45 | Expt1 |
| DIEDVFK                   | 3  | 149262253;118582271                                                                                                                            | N-Term(iTRAQ4plex), K8(iTRAQ4plex)                                   | 1316.70427 | 64 | 53  |      | 3.06 | Expt1 |

|                            |    |                                                              |                                                     |            |    |     |  |      |       |
|----------------------------|----|--------------------------------------------------------------|-----------------------------------------------------|------------|----|-----|--|------|-------|
| DLTDYLMK                   | 64 | 6671509;6752954;6671507;157823889;14192922;33563240;30425250 | N-Term(iTRAQ4plex), K8(iTRAQ4plex)                  | 1286.69951 | 64 | 51  |  | 3.99 | Expt1 |
| NSLDCEIVSAK                | 3  | 157951604                                                    | N-Term(iTRAQ4plex), C5(Methylthio), K11(iTRAQ4plex) | 1512.76140 | 64 | 78  |  | 4.90 | Expt1 |
| YDAFGEDSSSAMGIENR          | 6  | 120407050                                                    | N-Term(iTRAQ4plex)                                  | 1992.87541 | 64 | 95  |  | 4.92 | Expt1 |
| DIVPVDA5YEVK               | 2  | 6754982                                                      | N-Term(iTRAQ4plex), K12(iTRAQ4plex)                 | 1622.89617 | 64 |     |  | 3.08 | Expt1 |
| AFGENAVVQLISLQK            | 16 | 225543183                                                    | N-Term(iTRAQ4plex), K15(iTRAQ4plex)                 | 1905.10801 | 64 | 63  |  | 4.69 | Expt1 |
| TPSYEPQETDSLGMETK          | 5  | 112421039                                                    | N-Term(iTRAQ4plex), M15(Oxidation), K18(iTRAQ4plex) | 2345.11338 | 64 | 70  |  | 6.97 | Expt1 |
| YGPIADVIVYDQQSR            | 13 | 6677975                                                      | N-Term(iTRAQ4plex)                                  | 1955.00176 | 64 | 96  |  | 5.17 | Expt1 |
| GYPTLLIFR                  | 4  | 83921612                                                     | N-Term(iTRAQ4plex)                                  | 1223.72881 | 64 | 43  |  | 3.28 | Expt1 |
| TEQGPPSSEYIFER             | 3  | 8393866                                                      | N-Term(iTRAQ4plex)                                  | 1783.86565 | 64 | 65  |  | 3.93 | Expt1 |
| WQNNLLPSR                  | 12 | 24762230;149250304;94372414;149254145;94388628;149261725     | N-Term(iTRAQ4plex)                                  | 1271.69927 | 64 | 39  |  | 3.31 | Expt1 |
| LLAEPVPGIK                 | 6  | 18017605;149262987;83003306                                  | N-Term(iTRAQ4plex), K10(iTRAQ4plex)                 | 1324.85088 | 64 | 79  |  | 3.89 | Expt1 |
| AVPQLQGYLR                 | 17 | 82880886;149261044;94405982;149270558;149270560;84662736     | N-Term(iTRAQ4plex)                                  | 1288.74956 | 64 | 55  |  | 3.90 | Expt1 |
| ELIPVFK                    | 10 | 29293809                                                     | N-Term(iTRAQ4plex), K8(iTRAQ4plex)                  | 1246.80486 | 64 | 51  |  | 3.14 | Expt1 |
| EIEEFDGLALR                | 3  | 226062635                                                    | N-Term(iTRAQ4plex)                                  | 1564.79912 | 64 | 61  |  | 4.18 | Expt1 |
| VLLQEEGAR                  | 22 | 82950147;82950149;149264086                                  | N-Term(iTRAQ4plex)                                  | 1158.66155 | 64 | 56  |  | 3.43 | Expt1 |
| NYTDDAIETDDLTIK            | 10 | 7106389                                                      | N-Term(iTRAQ4plex), K15(iTRAQ4plex)                 | 2015.00859 | 64 | 104 |  | 5.05 | Expt1 |
| NMQDVTEDYK                 | 3  | 54607171;113195684                                           | N-Term(iTRAQ4plex), K10(iTRAQ4plex)                 | 1530.73723 | 64 | 51  |  | 4.35 | Expt1 |
| LLDNAFOR                   | 76 | 6680554                                                      | N-Term(iTRAQ4plex), N4(Deamidated)                  | 1121.60820 | 64 | 47  |  | 3.38 | Expt1 |
| LAEPSQLLK                  | 6  | 28395018                                                     | N-Term(iTRAQ4plex), K9(iTRAQ4plex)                  | 1286.79973 | 64 | 62  |  | 3.47 | Expt1 |
| FGFYEVFK                   | 3  | 149258501;19526818                                           | N-Term(iTRAQ4plex), K8(iTRAQ4plex)                  | 1324.72490 | 64 | 66  |  | 3.00 | Expt1 |
| DDTESLEIFQNEVAR            | 11 | 19072792                                                     | N-Term(iTRAQ4plex)                                  | 1909.93144 | 64 | 105 |  | 4.77 | Expt1 |
| YYPTEDVPR                  | 15 | 82880886;149261044;149270558;84662736                        | N-Term(iTRAQ4plex)                                  | 1283.63884 | 64 | 40  |  | 3.01 | Expt1 |
| FIIPNIVK                   | 22 | 6754524;257743039                                            | N-Term(iTRAQ4plex), K8(iTRAQ4plex)                  | 1231.80693 | 64 | 38  |  | 3.29 | Expt1 |
| TEPTAQNNLALQLAEK           | 3  | 149258001;22203755                                           | N-Term(iTRAQ4plex), K16(iTRAQ4plex)                 | 2043.13144 | 63 | 48  |  | 4.95 | Expt1 |
| QDVYGPQPQVR                | 5  | 146219835;146219830;146219849;146231979                      | N-Term(iTRAQ4plex)                                  | 1430.75139 | 63 | 38  |  | 3.57 | Expt1 |
| IDEPLEGSEDR                | 26 | 13384620                                                     | N-Term(iTRAQ4plex)                                  | 1403.68181 | 63 | 61  |  | 3.94 | Expt1 |
| IEVIEIMTDR                 | 20 | 6754220;63652391;82951294;85060507;260304980                 | N-Term(iTRAQ4plex)                                  | 1362.74626 | 63 | 49  |  | 4.09 | Expt1 |
| YAICALAASALPALVMSK         | 3  | 30794450                                                     | N-Term(iTRAQ4plex), C4(Methylthio), K19(iTRAQ4plex) | 2214.20084 | 63 | 67  |  | 5.06 | Expt1 |
| EGALCEENMR                 | 20 | 149253258;33859482                                           | N-Term(iTRAQ4plex), C5(Methylthio)                  | 1341.57073 | 63 | 57  |  | 4.01 | Expt1 |
| ISEQFTAMFR                 | 8  | 33859488;31981939;7106439;22165384;21746161;12963615         | N-Term(iTRAQ4plex)                                  | 1373.70696 | 63 | 50  |  | 4.00 | Expt1 |
| LVIIEGDLER                 | 9  | 40254525                                                     | N-Term(iTRAQ4plex)                                  | 1300.76201 | 63 | 50  |  | 3.48 | Expt1 |
| ASAPATPLSPTR               | 33 | 188219589                                                    | N-Term(iTRAQ4plex)                                  | 1312.73540 | 63 | 68  |  | 4.12 | Expt1 |
| GFALVGVGSEASSK             | 3  | 62909983                                                     | N-Term(iTRAQ4plex), K14(iTRAQ4plex)                 | 1596.88701 | 63 | 77  |  | 4.40 | Expt1 |
| LPLQDVYK                   | 22 | 126032329;6681273                                            | N-Term(iTRAQ4plex), K8(iTRAQ4plex)                  | 1263.75456 | 63 | 62  |  | 3.13 | Expt1 |
| VLITDILLAR                 | 27 | 176865892;21450625;176866061;226823309;176865998             | N-Term(iTRAQ4plex)                                  | 1258.78862 | 63 | 53  |  | 3.49 | Expt1 |
| LALQALTEK                  | 3  | 62526118                                                     | N-Term(iTRAQ4plex), K9(iTRAQ4plex)                  | 1274.79949 | 63 | 48  |  | 3.66 | Expt1 |
| AFTGIEDPVTR                | 23 | 111185907                                                    | N-Term(iTRAQ4plex)                                  | 1349.72234 | 63 | 50  |  | 4.14 | Expt1 |
| AGGANDAQSE                 | 9  | 19482160                                                     | N-Term(iTRAQ4plex)                                  | 1226.54375 | 63 | 69  |  | 2.92 | Expt1 |
| AVYTVVNDPQQFVVVTDPTTNDGILK | 11 | 6753374                                                      | N-Term(iTRAQ4plex), K27(iTRAQ4plex)                 | 3236.69968 | 63 | 87  |  | 5.59 | Expt1 |
| GQETSTNPIASIFAWSR          | 12 | 162417975                                                    | N-Term(iTRAQ4plex)                                  | 2009.02934 | 63 | 129 |  | 4.90 | Expt1 |
| SGAAQGLAEVMAGLVGVEK        | 3  | 149254348;112807186                                          | N-Term(iTRAQ4plex), K18(iTRAQ4plex)                 | 1976.07914 | 63 | 58  |  | 5.45 | Expt1 |
| GFIGPGIDVPAPDMSTGER        | 18 | 6680027                                                      | N-Term(iTRAQ4plex)                                  | 2060.03032 | 63 | 57  |  | 4.57 | Expt1 |
| FVELPGAEMGK                | 3  | 94364712;82617575                                            | N-Term(iTRAQ4plex), K11(iTRAQ4plex)                 | 1465.80327 | 63 | 52  |  | 3.57 | Expt1 |
| EEFASTCPDDEEIELAYEQVAR     | 21 | 15617203                                                     | N-Term(iTRAQ4plex), C7(Methylthio)                  | 2734.20847 | 63 | 85  |  | 5.84 | Expt1 |
| SIVVIDPDTGR                | 18 | 112421039                                                    | N-Term(iTRAQ4plex)                                  | 1315.73516 | 63 | 82  |  | 3.78 | Expt1 |

|                              |    |                                                |                                                     |            |    |     |      |      |       |
|------------------------------|----|------------------------------------------------|-----------------------------------------------------|------------|----|-----|------|------|-------|
| QGGLGPMNIPLISDPK             | 14 | 94400195;149267887;6754976                     | N-Term(iTRAQ4plex), K16(iTRAQ4plex)                 | 1925.08110 | 63 | 86  |      | 4.38 | Expt1 |
| DITSDTSGDFR                  | 45 | 124517663                                      | N-Term(iTRAQ4plex)                                  | 1357.63640 | 63 | 72  |      | 4.43 | Expt1 |
| MQLEIITDK                    | 3  | 33859811                                       | N-Term(iTRAQ4plex), K11(iTRAQ4plex)                 | 1592.92534 | 63 | 78  |      | 4.32 | Expt1 |
| STESLQANVQR                  | 14 | 149251177;149252074;149258092;94397192         | N-Term(iTRAQ4plex)                                  | 1376.72661 | 63 | 73  |      | 4.76 | Expt1 |
| GGVDVILPNVEGK                | 14 | 61743961                                       | N-Term(iTRAQ4plex), K13(iTRAQ4plex)                 | 1584.92717 | 63 | 76  |      | 4.62 | Expt1 |
| FSNEEIAMATVTALR              | 27 | 6671539                                        | N-Term(iTRAQ4plex), M8(Oxidation)                   | 1812.93364 | 63 | 86  |      | 5.11 | Expt1 |
| ALYLIATNGTPELQNPEK           | 3  | 112181194;46559406                             | N-Term(iTRAQ4plex), N8(Deamidated), K18(iTRAQ4plex) | 2261.23001 | 63 | 55  |      | 4.74 | Expt1 |
| IAIVGAGIGGTSSAYYLR           | 5  | 13385294                                       | N-Term(iTRAQ4plex)                                  | 1913.06394 | 63 | 79  |      | 4.30 | Expt1 |
| EIDLLGQTDTR                  | 8  | 40018610                                       | N-Term(iTRAQ4plex)                                  | 1632.86016 | 63 | 71  | 1.21 | 3.91 | Expt1 |
| SVPMVPPGIK                   | 52 | 160333372                                      | N-Term(iTRAQ4plex), K10(iTRAQ4plex)                 | 1312.80010 | 63 | 73  |      | 3.84 | Expt1 |
| NLPLPPPPPPR                  | 33 | 13384620                                       | N-Term(iTRAQ4plex)                                  | 1338.80290 | 63 | 63  |      | 3.87 | Expt1 |
| LLEPLVTQVTLVNTNSK            | 3  | 6753294                                        | N-Term(iTRAQ4plex), K18(iTRAQ4plex)                 | 2258.32633 | 63 | 68  |      | 5.07 | Expt1 |
| LLEPLVTQVTLVNTSNK            | 1  | 157951729;157951727                            | N-Term(iTRAQ4plex), K18(iTRAQ4plex)                 | 2258.32633 | 63 |     |      |      | Expt1 |
| DTTASAVAVGLR                 | 6  | 33859811                                       | N-Term(iTRAQ4plex)                                  | 1304.72722 | 63 | 73  |      | 4.26 | Expt1 |
| ELLALDSVDPEGR                | 7  | 115270960                                      | N-Term(iTRAQ4plex)                                  | 1557.82659 | 63 | 63  |      | 4.37 | Expt1 |
| ALLQAILQTEDMLK               | 5  | 82950147;82950149;149264086                    | N-Term(iTRAQ4plex), K14(iTRAQ4plex)                 | 1875.09464 | 63 | 57  |      | 4.87 | Expt1 |
| QDIAFAYQR                    | 34 | 149260099;6996913                              | N-Term(iTRAQ4plex)                                  | 1255.65618 | 63 | 53  |      | 3.80 | Expt1 |
| NLDDGIDDER                   | 9  | 6754972;31560656;255652857                     | N-Term(iTRAQ4plex)                                  | 1305.60356 | 63 | 62  |      | 3.83 | Expt1 |
| FATEAAITLR                   | 23 | 110625624                                      | N-Term(iTRAQ4plex)                                  | 1349.79387 | 63 | 70  |      | 4.25 | Expt1 |
| LQSEIEMAATETR                | 7  | 112421039                                      | N-Term(iTRAQ4plex)                                  | 1622.82073 | 63 | 70  |      | 5.10 | Expt1 |
| NSTFSELFK                    | 37 | 6678359                                        | N-Term(iTRAQ4plex), K9(iTRAQ4plex)                  | 1360.73723 | 63 | 78  |      | 4.14 | Expt1 |
| GIMDEDDACGR                  | 5  | 28395018                                       | N-Term(iTRAQ4plex), M3(Oxidation), C9(Methylthio)   | 1387.53862 | 63 | 51  |      | 2.90 | Expt1 |
| QLSALADQQGR                  | 12 | 111185907                                      | N-Term(iTRAQ4plex)                                  | 1330.72026 | 63 | 69  |      | 3.94 | Expt1 |
| YTLPPGVDPTLVSSLSPEGLTVEAPLPK | 10 | 158937312                                      | N-Term(iTRAQ4plex), K30(iTRAQ4plex)                 | 3353.83957 | 63 | 71  |      | 5.16 | Expt1 |
| VELQELNDR                    | 19 | 33563250;31982755                              | N-Term(iTRAQ4plex)                                  | 1259.67095 | 63 | 46  |      | 3.76 | Expt1 |
| LLQDFNFR                     | 47 | 124339829;124339826                            | N-Term(iTRAQ4plex), N7(Deamidated)                  | 1254.66435 | 63 | 58  |      | 3.78 | Expt1 |
| MLFDYLADK                    | 3  | 45476573                                       | N-Term(iTRAQ4plex), K9(iTRAQ4plex)                  | 1403.75578 | 63 | 65  |      | 3.96 | Expt1 |
| DQNTNDQVTDLSALATQK           | 5  | 225579033                                      | N-Term(iTRAQ4plex), K17(iTRAQ4plex)                 | 2136.10508 | 63 | 65  |      | 5.50 | Expt1 |
| EATTEFSVDAR                  | 7  | 125347376                                      | N-Term(iTRAQ4plex)                                  | 1369.67156 | 63 | 65  |      | 3.27 | Expt1 |
| ASDLGDGLTATR                 | 10 | 6677691                                        | N-Term(iTRAQ4plex)                                  | 1378.69365 | 63 | 63  |      | 4.05 | Expt1 |
| APILIATDVASR                 | 18 | 40068493;93587673;40068491;83816893            | N-Term(iTRAQ4plex)                                  | 1370.81401 | 63 | 62  |      | 3.82 | Expt1 |
| FNPVTGEVPPR                  | 8  | 160358829                                      | N-Term(iTRAQ4plex)                                  | 1356.74162 | 63 | 51  |      | 3.38 | Expt1 |
| EFDELSPSAQR                  | 5  | 6806903;158635979                              | N-Term(iTRAQ4plex)                                  | 1422.69866 | 63 | 44  |      | 3.53 | Expt1 |
| GIADVPEWFR                   | 2  | 21313520                                       | N-Term(iTRAQ4plex)                                  | 1333.70488 | 63 |     |      | 3.30 | Expt1 |
| TEMENEFVLIK                  | 10 | 114145561                                      | N-Term(iTRAQ4plex), K11(iTRAQ4plex)                 | 1640.89226 | 63 | 65  |      | 4.73 | Expt1 |
| FYPDPQAQLTEDITR              | 8  | 190684669;190684673;7305029;190881478;54873604 | N-Term(iTRAQ4plex)                                  | 1906.97429 | 63 | 65  |      | 3.40 | Expt1 |
| AILNYIASK                    | 3  | 31981724                                       | N-Term(iTRAQ4plex), K9(iTRAQ4plex)                  | 1280.78813 | 63 | 58  |      | 3.70 | Expt1 |
| SVGMIAGGTGITPMLQVIR          | 11 | 19745150                                       | N-Term(iTRAQ4plex)                                  | 2045.14157 | 63 | 82  |      | 5.31 | Expt1 |
| SIPAYLAETLYAMK               | 16 | 6753060                                        | N-Term(iTRAQ4plex), M14(Oxidation), K15(iTRAQ4plex) | 2038.08872 | 63 | 79  |      | 6.50 | Expt1 |
| AVVYSNTIQSIMAIVK             | 8  | 94410730;41054806                              | N-Term(iTRAQ4plex), K16(iTRAQ4plex)                 | 2025.17319 | 63 | 76  |      | 4.22 | Expt1 |
| ASIPFSVSGSNQLIEAK            | 8  | 6754816;228480253                              | N-Term(iTRAQ4plex), K17(iTRAQ4plex)                 | 2048.16849 | 63 | 68  |      | 4.93 | Expt1 |
| TSFIQYLLEQEVPGSR             | 6  | 55742711                                       | N-Term(iTRAQ4plex)                                  | 2011.06455 | 63 | 66  |      | 4.28 | Expt1 |
| VLATAFDTTLLGGR               | 13 | 112293266                                      | N-Term(iTRAQ4plex)                                  | 1465.81621 | 63 | 63  |      | 4.02 | Expt1 |
| VFVTGPLPAEGR                 | 9  | 17933768                                       | N-Term(iTRAQ4plex)                                  | 1386.78887 | 63 | 58  |      | 3.95 | Expt1 |
| LPDGSSTNQFSPDAPLEEAR         | 3  | 85861252                                       | N-Term(iTRAQ4plex)                                  | 2422.17313 | 63 | 57  |      | 5.28 | Expt1 |
| GPLQSVQVFR                   | 12 | 149254484;149262347                            | N-Term(iTRAQ4plex)                                  | 1331.75810 | 63 | 66  |      | 3.82 | Expt1 |
| GAFSNPETLDLYR                | 10 | 21313520                                       | N-Term(iTRAQ4plex)                                  | 1626.82610 | 63 | 81  |      | 4.40 | Expt1 |
| LVVPATQCGLSIGK               | 11 | 6754994                                        | N-Term(iTRAQ4plex), C8(Methylthio), K14(iTRAQ4plex) | 1719.98039 | 62 | 101 |      | 4.31 | Expt1 |
| QSGEAFVELESEDDVK             | 8  | 19527048                                       | N-Term(iTRAQ4plex), K16(iTRAQ4plex)                 | 2070.01250 | 62 | 88  |      | 4.31 | Expt1 |
| VILGDSGVGK                   | 3  | 148747526                                      | N-Term(iTRAQ4plex), K11(iTRAQ4plex)                 | 1345.83733 | 62 | 71  |      | 3.62 | Expt1 |
| ITSEEVVSR                    | 14 | 162287370;161760667                            | N-Term(iTRAQ4plex)                                  | 1292.68352 | 62 | 62  |      | 3.85 | Expt1 |

|                                          |    |                                                                           |                                                      |            |    |     |      |       |
|------------------------------------------|----|---------------------------------------------------------------------------|------------------------------------------------------|------------|----|-----|------|-------|
| YSLEPVAAELK                              | 11 | 70778976                                                                  | N-Term(iTRAQ4plex), K11(iTRAQ4plex)                  | 1507.86308 | 62 | 81  | 4.58 | Expt1 |
| VFPGSTTEDYNLIVIER                        | 8  | 170295840                                                                 | N-Term(iTRAQ4plex)                                   | 2097.09868 | 62 | 94  | 4.78 | Expt1 |
| DGLGGLPDIVR                              | 7  | 7305619                                                                   | N-Term(iTRAQ4plex)                                   | 1255.71453 | 62 | 66  | 3.95 | Expt1 |
| GDFILVGDLMR                              | 5  | 7657011                                                                   | N-Term(iTRAQ4plex)                                   | 1379.75054 | 62 | 47  | 3.81 | Expt1 |
| IEPGVDPDDTYNETPYEK                       | 10 | 227499103;227499234                                                       | N-Term(iTRAQ4plex), K18(iTRAQ4plex)                  | 2370.12503 | 62 | 69  | 4.51 | Expt1 |
| VMILITDQK                                | 27 | 111074529                                                                 | N-Term(iTRAQ4plex), K9(iTRAQ4plex)                   | 1277.77361 | 62 | 63  | 4.08 | Expt1 |
| VPAPESTASDEAPGAPAPPEPPESCAPEPAPEGPGSQSER | 4  | 58037101                                                                  | N-Term(iTRAQ4plex), C25(Methylthio)                  | 4025.82778 | 62 |     | 5.39 | Expt1 |
| ALTVPELTQQMFDK                           | 14 | 31981939;22165384;14925348<br>8;149253527;83030206;277540<br>56;12963615  | N-Term(iTRAQ4plex), M11(Oxidation), K15(iTRAQ4plex)  | 1996.07517 | 62 | 58  | 5.02 | Expt1 |
| AVAVVVDPIQSVK                            | 3  | 145966883                                                                 | N-Term(iTRAQ4plex), K13(iTRAQ4plex)                  | 1612.99455 | 62 | 72  | 4.27 | Expt1 |
| TIAMDGTEGLVR                             | 24 | 31980648                                                                  | N-Term(iTRAQ4plex)                                   | 1406.74260 | 62 | 71  | 4.41 | Expt1 |
| DISTLEPLK                                | 8  | 149253242;18700032;4025460<br>0                                           | N-Term(iTRAQ4plex), K9(iTRAQ4plex)                   | 1303.77861 | 62 | 47  | 4.08 | Expt1 |
| DIPGLTDTTTPR                             | 32 | 94367038;82885362;14925898<br>6;82922450;149265796;829553<br>11;149271678 | N-Term(iTRAQ4plex)                                   | 1428.78447 | 62 | 73  | 3.51 | Expt1 |
| IVLLGESAVGK                              | 16 | 28916687;149249575;1138660<br>24;13385374                                 | N-Term(iTRAQ4plex), K11(iTRAQ4plex)                  | 1373.86650 | 62 | 67  | 3.45 | Expt1 |
| TYQVGWDTFCVK                             | 19 | 111074529                                                                 | N-Term(iTRAQ4plex), C10(Methylthio), K12(iTRAQ4plex) | 1780.86919 | 62 | 81  | 4.24 | Expt1 |
| LDQEDALLGSYPVDDGCR                       | 3  | 170650659                                                                 | N-Term(iTRAQ4plex), C17(Methylthio)                  | 2155.97954 | 62 | 98  | 5.32 | Expt1 |
| EDQTEYLEER                               | 21 | 40556608;6754254                                                          | N-Term(iTRAQ4plex)                                   | 1455.67436 | 62 | 51  | 4.70 | Expt1 |
| GMTLVTPLQLLLFASK                         | 6  | 150456419                                                                 | N-Term(iTRAQ4plex), M2(Oxidation), K16(iTRAQ4plex)   | 2036.20841 | 62 | 58  | 4.06 | Expt1 |
| DGHLLFGQVPLVEIDGMMLTQTR                  | 18 | 160298217                                                                 | N-Term(iTRAQ4plex), M17(Oxidation)                   | 2730.42093 | 62 | 53  | 5.65 | Expt1 |
| EIAEAYLQK                                | 7  | 31981690                                                                  | N-Term(iTRAQ4plex), K9(iTRAQ4plex)                   | 1281.73943 | 62 | 54  | 3.76 | Expt1 |
| DQMQQQLSDYEQLLDVK                        | 7  | 188219589                                                                 | N-Term(iTRAQ4plex), M3(Oxidation), K17(iTRAQ4plex)   | 2385.19480 | 62 | 74  | 5.74 | Expt1 |
| TAVDLSLVAYSVK                            | 6  | 62526118                                                                  | N-Term(iTRAQ4plex), K12(iTRAQ4plex)                  | 1540.87497 | 62 | 40  | 3.98 | Expt1 |
| ILITTVPPNLR                              | 3  | 13385872                                                                  | N-Term(iTRAQ4plex)                                   | 1380.87297 | 62 | 35  | 3.25 | Expt1 |
| IVYTSADGTINEVEVDPIITFFPK                 | 8  | 226423922                                                                 | N-Term(iTRAQ4plex), K25(iTRAQ4plex)                  | 3039.60678 | 62 | 91  | 5.61 | Expt1 |
| IVDDLTLNLCNSVK                           | 29 | 111074529                                                                 | N-Term(iTRAQ4plex), C10(Methylthio), K14(iTRAQ4plex) | 1881.01177 | 62 | 113 | 4.81 | Expt1 |
| LASQANIAQVLAELK                          | 9  | 78711838;21313640;88853578                                                | N-Term(iTRAQ4plex), K15(iTRAQ4plex)                  | 1857.11405 | 62 | 69  | 5.06 | Expt1 |
| NMQDLVEDYK                               | 16 | 20911031                                                                  | N-Term(iTRAQ4plex), M2(Oxidation), K10(iTRAQ4plex)   | 1558.77287 | 62 | 62  | 3.88 | Expt1 |
| TNQELQEINR                               | 58 | 149260099;6996913                                                         | N-Term(iTRAQ4plex)                                   | 1388.72510 | 62 | 69  | 4.89 | Expt1 |
| TLVGPDANTIR                              | 18 | 111185907                                                                 | N-Term(iTRAQ4plex)                                   | 1300.73747 | 62 | 64  | 3.71 | Expt1 |
| YDPTIEDSYR                               | 15 | 21704066;149261508                                                        | N-Term(iTRAQ4plex)                                   | 1402.66130 | 62 | 56  | 3.33 | Expt1 |
| EWFLAAK                                  | 3  | 94380203;254553458                                                        | N-Term(iTRAQ4plex), K8(iTRAQ4plex)                   | 1281.71965 | 62 | 49  | 3.65 | Expt1 |
| VPAGLPDLK                                | 25 | 20137008                                                                  | N-Term(iTRAQ4plex), K9(iTRAQ4plex)                   | 1197.74797 | 62 | 51  | 3.02 | Expt1 |
| IIMEEVVK                                 | 8  | 111185907                                                                 | N-Term(iTRAQ4plex), K8(iTRAQ4plex)                   | 1248.75578 | 62 | 49  | 3.64 | Expt1 |
| YFVEAGAMAVR                              | 14 | 110625624                                                                 | N-Term(iTRAQ4plex)                                   | 1357.70342 | 62 | 60  | 4.09 | Expt1 |
| VQISLVQYSR                               | 41 | 111074529                                                                 | N-Term(iTRAQ4plex)                                   | 1336.76969 | 62 | 63  | 4.38 | Expt1 |
| ALYEAELSQMQTHISDTSVVLMSMDNNR             | 8  | 54607171                                                                  | N-Term(iTRAQ4plex), M23(Oxidation)                   | 3212.54148 | 62 | 61  | 7.17 | Expt1 |
| DAFVAIVQSVK                              | 5  | 31981302;158966670                                                        | N-Term(iTRAQ4plex), K11(iTRAQ4plex)                  | 1464.87724 | 62 | 69  | 4.42 | Expt1 |
| AEQDAFIHGQLSYLR                          | 6  | 6680554                                                                   | N-Term(iTRAQ4plex)                                   | 1989.03110 | 62 |     | 3.90 | Expt1 |
| LLGPDAAINLADPDGALAK                      | 4  | 28076935                                                                  | N-Term(iTRAQ4plex), K19(iTRAQ4plex)                  | 2123.20090 | 62 | 66  | 4.49 | Expt1 |
| FQVNNNDNQLLLQR                           | 95 | 148277039                                                                 | N-Term(iTRAQ4plex), N4(Deamidated)                   | 1746.92900 | 62 | 86  | 5.57 | Expt1 |
| DTNLGQPVIQQFEQDGR                        | 21 | 170172540                                                                 | N-Term(iTRAQ4plex)                                   | 2089.04692 | 62 | 76  | 5.59 | Expt1 |
| VVNIVPVIK                                | 3  | 164698481;8393784;16469847<br>9                                           | N-Term(iTRAQ4plex), K10(iTRAQ4plex)                  | 1339.89470 | 62 | 49  | 3.38 | Expt1 |
| VGVVQYSSDTR                              | 42 | 111074529                                                                 | N-Term(iTRAQ4plex)                                   | 1354.70903 | 62 | 59  | 4.45 | Expt1 |
| LVPGGGATEIELAK                           | 6  | 126723461                                                                 | N-Term(iTRAQ4plex), K14(iTRAQ4plex)                  | 1642.97147 | 62 | 59  | 4.52 | Expt1 |
| GNFNIEFTR                                | 15 | 21728376;71037403                                                         | N-Term(iTRAQ4plex)                                   | 1404.70671 | 62 | 50  | 4.06 | Expt1 |
| SGALNSNDAFVLK                            | 6  | 28916693                                                                  | N-Term(iTRAQ4plex), K13(iTRAQ4plex)                  | 1623.88970 | 62 | 73  | 5.17 | Expt1 |
| GSTLSQWWSLGNIPVTSR                       | 3  | 124487057                                                                 | N-Term(iTRAQ4plex), N11(Deamidated)                  | 2005.04961 | 62 | 55  | 3.60 | Expt1 |
| EQISDIDDAVR                              | 25 | 6755364                                                                   | N-Term(iTRAQ4plex)                                   | 1404.71086 | 62 | 69  | 4.16 | Expt1 |
| YIIIGDTGVGK                              | 10 | 30525051;10946940                                                         | N-Term(iTRAQ4plex), K11(iTRAQ4plex)                  | 1423.84355 | 62 | 66  | 3.36 | Expt1 |
| GFFELFPSVSR                              | 19 | 161016822;161016820                                                       | N-Term(iTRAQ4plex)                                   | 1429.76421 | 62 | 54  | 4.18 | Expt1 |
| PMFIVNTNVP                               | 5  | 6754696                                                                   | N-Term(iTRAQ4plex)                                   | 1431.78948 | 62 | 43  |      | Expt1 |

|                             |    |                                                         |                                                     |            |    |     |  |      |       |
|-----------------------------|----|---------------------------------------------------------|-----------------------------------------------------|------------|----|-----|--|------|-------|
| DEAAYGALR                   | 12 | 20137004;71725358                                       | N-Term(iTRAQ4plex)                                  | 1109.57109 | 62 | 52  |  | 3.53 | Expt1 |
| VADQDGDSMATR                | 7  | 188035858                                               | N-Term(iTRAQ4plex)                                  | 1409.64495 | 62 | 58  |  | 3.93 | Expt1 |
| DQVANSFAVER                 | 9  | 6754254                                                 | N-Term(iTRAQ4plex)                                  | 1379.70610 | 62 | 65  |  | 4.16 | Expt1 |
| GIVDSITGQR                  | 21 | 82950147;82950149;149264086                             | N-Term(iTRAQ4plex)                                  | 1189.66753 | 62 | 50  |  | 3.83 | Expt1 |
| FYAELEELDFQGATEESR          | 12 | 6678097;255759941                                       | N-Term(iTRAQ4plex)                                  | 2407.10991 | 62 | 111 |  | 5.45 | Expt1 |
| TEEDYPFHEEY                 | 6  | 160415215                                               | N-Term(iTRAQ4plex)                                  | 1602.67583 | 62 | 39  |  | 2.87 | Expt1 |
| ISMADVDLNVAAPK              | 12 | 61743961                                                | N-Term(iTRAQ4plex), K14(iTRAQ4plex)                 | 1731.95830 | 62 | 135 |  | 5.07 | Expt1 |
| ENLATVEGNFASIDAR            | 13 | 28076935                                                | N-Term(iTRAQ4plex)                                  | 1850.94193 | 62 | 75  |  | 5.17 | Expt1 |
| FAPPEAPEPWSGVR              | 7  | 27370126;37718991;120474987;21704206;268839831          | N-Term(iTRAQ4plex)                                  | 1683.86553 | 62 | 56  |  | 3.40 | Expt1 |
| VEGVQQLVPAER                | 11 | 113865981                                               | N-Term(iTRAQ4plex)                                  | 1567.89385 | 62 | 59  |  | 4.92 | Expt1 |
| LFVTNDAATILR                | 9  | 126723461                                               | N-Term(iTRAQ4plex)                                  | 1477.85246 | 62 | 59  |  | 4.52 | Expt1 |
| IVMAAAAK                    | 36 | 163310769;34328288                                      | N-Term(iTRAQ4plex), K8(iTRAQ4plex)                  | 1062.66272 | 62 | 56  |  | 3.58 | Expt1 |
| SYEDMIGEEVPPDQYYWAPLAQHER   | 3  | 146219835;146219830;146219849;146231979                 | N-Term(iTRAQ4plex)                                  | 3167.45871 | 62 | 36  |  | 3.43 | Expt1 |
| ADHQPLTEASYVNLPTIALCNTDSPLR | 3  | 149251929;63514363;82905443;51770420;82994829;149270876 | N-Term(iTRAQ4plex), C20(Methylthio)                 | 3129.55552 | 62 | 62  |  | 5.57 | Expt1 |
| APSTYGGMSVTSSR              | 22 | 21489935                                                | N-Term(iTRAQ4plex)                                  | 1544.75298 | 62 | 102 |  | 4.39 | Expt1 |
| EAVGDLLDAFK                 | 3  | 56699432;56699434                                       | N-Term(iTRAQ4plex), K11(iTRAQ4plex)                 | 1465.81743 | 62 | 83  |  | 4.09 | Expt1 |
| DGALTQLNVAFSR               | 7  | 6679421                                                 | N-Term(iTRAQ4plex)                                  | 1535.82952 | 62 | 78  |  | 3.75 | Expt1 |
| DVLSVAFSSDNR                | 23 | 6680047                                                 | N-Term(iTRAQ4plex)                                  | 1453.74297 | 62 | 73  |  | 4.47 | Expt1 |
| CLYASVLTAQPR                | 15 | 33859482                                                | N-Term(iTRAQ4plex), C1(Methylthio)                  | 1511.78765 | 62 | 72  |  | 3.89 | Expt1 |
| SLADLTAVDVPTR               | 3  | 82934613;149262115;58037117                             | N-Term(iTRAQ4plex)                                  | 1501.83599 | 62 | 70  |  | 4.21 | Expt1 |
| IMNVIGEPIDER                | 26 | 31980648                                                | N-Term(iTRAQ4plex)                                  | 1529.81511 | 62 | 65  |  | 4.05 | Expt1 |
| VQISPDGSGGLPER              | 3  | 163954948                                               | N-Term(iTRAQ4plex)                                  | 1498.80132 | 62 | 60  |  | 3.38 | Expt1 |
| DYEEIGPSICR                 | 3  | 23956222                                                | N-Term(iTRAQ4plex), C10(Methylthio)                 | 1471.66899 | 62 | 60  |  | 3.44 | Expt1 |
| VSWTPPSDSVDR                | 46 | 111074529                                               | N-Term(iTRAQ4plex)                                  | 1489.74162 | 62 | 57  |  | 3.73 | Expt1 |
| IPAFGSIPIEFR                | 4  | 77682555                                                | N-Term(iTRAQ4plex)                                  | 1490.85161 | 62 | 56  |  |      | Expt1 |
| ELLLTGPGLEER                | 6  | 149253441;41152116                                      | N-Term(iTRAQ4plex)                                  | 1470.83147 | 62 | 49  |  | 3.51 | Expt1 |
| VALIGSPDLTYR                | 11 | 229892318                                               | N-Term(iTRAQ4plex)                                  | 1547.89690 | 62 | 44  |  | 4.20 | Expt1 |
| ELQSQISDTSVVLMSMDNSR        | 21 | 114145561                                               | N-Term(iTRAQ4plex)                                  | 2253.11894 | 62 | 118 |  | 5.30 | Expt1 |
| DTDIVDEAIYFK                | 8  | 9790141                                                 | N-Term(iTRAQ4plex), K13(iTRAQ4plex)                 | 1879.96616 | 62 | 50  |  | 4.15 | Expt1 |
| VDTWFNQPAR                  | 13 | 149251177;149252074;94397192                            | N-Term(iTRAQ4plex)                                  | 1377.70549 | 62 | 44  |  | 4.08 | Expt1 |
| LPIPDSQVLTINPALPVEDAEDYAR   | 3  | 13384778                                                | N-Term(iTRAQ4plex)                                  | 2951.55704 | 61 | 78  |  | 6.17 | Expt1 |
| EDLIWEILK                   | 4  | 20330802                                                | N-Term(iTRAQ4plex), K9(iTRAQ4plex)                  | 1446.85051 | 61 | 61  |  | 3.81 | Expt1 |
| ELVFYLLMMAK                 | 6  | 148277039                                               | N-Term(iTRAQ4plex), K11(iTRAQ4plex)                 | 1695.91338 | 61 | 62  |  | 4.15 | Expt1 |
| QEELESVEAGVQGGAFEGTR        | 7  | 55742711                                                | N-Term(iTRAQ4plex)                                  | 2237.08225 | 61 | 77  |  | 5.64 | Expt1 |
| LQAEAPSLGPGLGK              | 5  | 226423931                                               | N-Term(iTRAQ4plex), K14(iTRAQ4plex)                 | 1625.94939 | 61 | 66  |  | 5.18 | Expt1 |
| SCAEFVSGSGLR                | 11 | 149266312;21313679                                      | N-Term(iTRAQ4plex), C2(Methylthio)                  | 1473.69682 | 61 | 49  |  | 3.74 | Expt1 |
| APSDLYQIILK                 | 8  | 160332229                                               | N-Term(iTRAQ4plex), K11(iTRAQ4plex)                 | 1548.92961 | 61 | 76  |  | 4.79 | Expt1 |
| NAIANASTLAEVER              | 6  | 228480232                                               | N-Term(iTRAQ4plex)                                  | 1602.85869 | 61 | 72  |  | 4.22 | Expt1 |
| NIYSLTPLLQGR                | 17 | 6753762                                                 | N-Term(iTRAQ4plex)                                  | 1518.88042 | 61 | 60  |  | 3.95 | Expt1 |
| IFVEESVYDEFVK               | 14 | 85861182                                                | N-Term(iTRAQ4plex), K13(iTRAQ4plex)                 | 1892.00029 | 61 | 94  |  | 4.67 | Expt1 |
| AIIIFVVPQLK                 | 37 | 6755376;149270446;83004243                              | N-Term(iTRAQ4plex), K12(iTRAQ4plex)                 | 1626.06450 | 61 | 65  |  | 3.57 | Expt1 |
| LVIPSELGYGER                | 3  | 6679805                                                 | N-Term(iTRAQ4plex)                                  | 1476.81828 | 61 |     |  | 3.11 | Expt1 |
| FQILEGPPESMGR               | 9  | 33859560                                                | N-Term(iTRAQ4plex)                                  | 1604.82500 | 61 | 60  |  | 3.77 | Expt1 |
| WLPSTSPVTGYR                | 7  | 46849812                                                | N-Term(iTRAQ4plex)                                  | 1507.80742 | 61 | 45  |  |      | Expt1 |
| DPPVFIPTVDR                 | 3  | 226437676                                               | N-Term(iTRAQ4plex)                                  | 1496.82451 | 61 | 37  |  | 2.88 | Expt1 |
| TIQFVDWCPTGFK               | 20 | 6755901;6678465;8394493;6678469                         | N-Term(iTRAQ4plex), C8(Methylthio), K13(iTRAQ4plex) | 1875.94328 | 61 | 69  |  | 4.74 | Expt1 |
| VVLQDDPQQTR                 | 19 | 112421039                                               | N-Term(iTRAQ4plex)                                  | 1455.80583 | 61 | 48  |  | 3.67 | Expt1 |
| EAEELLEPLMPAIR              | 5  | 15426055                                                | N-Term(iTRAQ4plex)                                  | 1625.90557 | 61 | 62  |  | 3.82 | Expt1 |
| MGPSGGEGVEPER               | 3  | 6754508                                                 | N-Term(iTRAQ4plex)                                  | 1445.68303 | 61 | 58  |  | 4.31 | Expt1 |

|                                           |    |                                                                                                                                                                                                                                                                                                                      |                                                                                     |            |    |    |      |       |
|-------------------------------------------|----|----------------------------------------------------------------------------------------------------------------------------------------------------------------------------------------------------------------------------------------------------------------------------------------------------------------------|-------------------------------------------------------------------------------------|------------|----|----|------|-------|
| ISMPEVDLNLK                               | 9  | 61743961                                                                                                                                                                                                                                                                                                             | N-Term(iTRAQ4plex), K11(iTRAQ4plex)                                                 | 1546.88469 | 61 | 78 | 4.16 | Expt1 |
| GCPAALPLSNLYETMGVVGSTTTQLYTDR             | 3  | 6678321                                                                                                                                                                                                                                                                                                              | N-Term(iTRAQ4plex), C2(Methylthio), Y26(iTRAQ4plex)                                 | 3392.68447 | 61 | 54 | 3.74 | Expt1 |
| SLTPGQPADQLLR                             | 4  | 161484644                                                                                                                                                                                                                                                                                                            | N-Term(iTRAQ4plex)                                                                  | 1539.86528 | 61 | 51 | 3.58 | Expt1 |
| LSLDVEALR                                 | 16 | 82950147;149264086                                                                                                                                                                                                                                                                                                   | N-Term(iTRAQ4plex)                                                                  | 1159.68144 | 61 | 55 | 3.76 | Expt1 |
| EGVIIELASR                                | 6  | 149265291;22165408                                                                                                                                                                                                                                                                                                   | N-Term(iTRAQ4plex)                                                                  | 1343.80242 | 61 | 59 | 3.80 | Expt1 |
| GIYMWVDEGR                                | 9  | 8393866                                                                                                                                                                                                                                                                                                              | N-Term(iTRAQ4plex)                                                                  | 1369.67046 | 61 | 65 | 3.96 | Expt1 |
| GFAFVQVYNER                               | 12 | 8393544;283436180;283436176;283436182                                                                                                                                                                                                                                                                                | N-Term(iTRAQ4plex)                                                                  | 1473.76189 | 61 | 55 | 3.97 | Expt1 |
| NVTLPAVFK                                 | 4  | 30794450                                                                                                                                                                                                                                                                                                             | N-Term(iTRAQ4plex), K9(iTRAQ4plex)                                                  | 1276.79839 | 61 | 50 | 3.50 | Expt1 |
| VLQPTIFPVVPR                              | 15 | 31560705                                                                                                                                                                                                                                                                                                             | N-Term(iTRAQ4plex)                                                                  | 1509.93340 | 61 | 64 | 3.96 | Expt1 |
| LEEGPPVTVLTR                              | 11 | 6679261                                                                                                                                                                                                                                                                                                              | N-Term(iTRAQ4plex)                                                                  | 1555.88188 | 61 | 64 | 4.32 | Expt1 |
| SAVDNQCDSWR                               | 3  | 124486895                                                                                                                                                                                                                                                                                                            | N-Term(iTRAQ4plex), C6(Methylthio)                                                  | 1470.62114 | 61 | 62 | 4.36 | Expt1 |
| YLTYLTVITDK                               | 6  | 82895306;94372654;94377377                                                                                                                                                                                                                                                                                           | N-Term(iTRAQ4plex), K10(iTRAQ4plex)                                                 | 1516.89214 | 61 | 63 | 3.68 | Expt1 |
| AAAVEHLQPGQQAPAGSAPADPQQQTLLSQTQLDGLGQIER | 3  | 111185907                                                                                                                                                                                                                                                                                                            | N-Term(iTRAQ4plex)                                                                  | 4539.26950 | 61 | 48 | 5.73 | Expt1 |
| AFITNIPFDVK                               | 14 | 21313308;158186704                                                                                                                                                                                                                                                                                                   | N-Term(iTRAQ4plex), K11(iTRAQ4plex)                                                 | 1552.90813 | 61 | 72 | 4.00 | Expt1 |
| NAVITVPAYFNDSQR                           | 5  | 162461907                                                                                                                                                                                                                                                                                                            | N-Term(iTRAQ4plex)                                                                  | 1838.95830 | 61 | 72 | 4.18 | Expt1 |
| ACGLNFADLMGR                              | 6  | 33859662                                                                                                                                                                                                                                                                                                             | N-Term(iTRAQ4plex), C2(Methylthio)                                                  | 1457.68425 | 61 | 74 | 4.84 | Expt1 |
| IYDSNNNPER                                | 11 | 51491845                                                                                                                                                                                                                                                                                                             | N-Term(iTRAQ4plex)                                                                  | 1478.73393 | 61 | 41 | 3.53 | Expt1 |
| DVTGAEALLER                               | 22 | 115496850                                                                                                                                                                                                                                                                                                            | N-Term(iTRAQ4plex)                                                                  | 1317.71184 | 61 | 67 | 4.37 | Expt1 |
| WGEAGAEYVVESTGVFTTMEK                     | 7  | 149248895;149249272;149251040;149251044;149251140;149251223;149251463;149251509;149251903;149251905;149251911;149251964;149251966;149257623;149258770;149258772;149258934;149258938;149259154;149259607;149260709;149263021;149265154;149265502;149265922;149266427;149266431;149268472;149268967;82996390;149273204 | N-Term(iTRAQ4plex), M19(Oxidation), K21(iTRAQ4plex)                                 | 2595.26163 | 61 | 54 | 5.26 | Expt1 |
| GGCQAQDYTSGMGIIVNGAK                      | 7  | 160707889                                                                                                                                                                                                                                                                                                            | N-Term(iTRAQ4plex), C3(Methylthio), N16(Deamidated), K19(iTRAQ4plex)                | 2192.00187 | 61 | 61 | 5.66 | Expt1 |
| SDDPDQYLLINTAR                            | 8  | 13928670                                                                                                                                                                                                                                                                                                             | N-Term(iTRAQ4plex)                                                                  | 1892.94451 | 61 | 79 | 4.11 | Expt1 |
| VNVEAPNVNMEGLGK                           | 3  | 61743961                                                                                                                                                                                                                                                                                                             | N-Term(iTRAQ4plex), M10(Oxidation), K16(iTRAQ4plex)                                 | 1932.01535 | 61 | 60 | 4.75 | Expt1 |
| GCVQDETCTR                                | 11 | 19526946                                                                                                                                                                                                                                                                                                             | N-Term(iTRAQ4plex), C2(Methylthio), C8(Methylthio)                                  | 1347.52703 | 61 | 59 | 4.06 | Expt1 |
| LDANIPEVAVEGPEGK                          | 7  | 61743961                                                                                                                                                                                                                                                                                                             | N-Term(iTRAQ4plex), K16(iTRAQ4plex)                                                 | 1926.04062 | 61 | 53 | 5.48 | Expt1 |
| FMNSGQTCVAPDYILCDPSIQNEIVEK               | 14 | 163310769                                                                                                                                                                                                                                                                                                            | N-Term(iTRAQ4plex), M2(Oxidation), C8(Methylthio), C16(Methylthio), K27(iTRAQ4plex) | 3410.57802 | 61 | 57 | 5.47 | Expt1 |
| LQIWDTAGQER                               | 40 | 6679587;30424655;37718983;31560778;18390323;7710086;149253245;149264760;149264762;149269408;8394133;12963723;171184402;27734154;6679593;261862303;30425356;86476069;13195674;38372905;21313162;13470090;165377074;15042957;30424726;106507168;21313012;254939625;254939635;254939698;254750706                       | N-Term(iTRAQ4plex)                                                                  | 1460.76238 | 61 | 49 | 3.60 | Expt1 |
| FGEGMLAWNR                                | 14 | 82950147;82950149;149264086                                                                                                                                                                                                                                                                                          | N-Term(iTRAQ4plex)                                                                  | 1452.71965 | 61 | 56 | 4.34 | Expt1 |
| DYIPVDQELR                                | 7  | 134288917                                                                                                                                                                                                                                                                                                            | N-Term(iTRAQ4plex)                                                                  | 1520.77324 | 61 | 53 | 3.39 | Expt1 |
| NFILDQCNVVYNSGQR                          | 13 | 149270322;124487099                                                                                                                                                                                                                                                                                                  | N-Term(iTRAQ4plex), C7(Methylthio)                                                  | 1960.91167 | 61 | 64 | 4.26 | Expt1 |
| VTTMDAELEFAIQPNITTKG                      | 6  | 149266483;157277952;70778915;157277948                                                                                                                                                                                                                                                                               | N-Term(iTRAQ4plex), M4(Oxidation), K19(iTRAQ4plex)                                  | 2370.21787 | 61 | 56 | 5.15 | Expt1 |
| GGGGLGLGSLVGGSGFSAGSSQGGMSFGSGGGSSSVK     | 10 | 20911031                                                                                                                                                                                                                                                                                                             | N-Term(iTRAQ4plex), M27(Oxidation), K40(iTRAQ4plex)                                 | 3596.71469 | 61 | 91 | 6.89 | Expt1 |
| FSVEIIQK                                  | 4  | 31980632                                                                                                                                                                                                                                                                                                             | N-Term(iTRAQ4plex), K9(iTRAQ4plex)                                                  | 1380.79827 | 61 | 59 | 4.05 | Expt1 |



|                              |    |                                         |                                                      |            |    |    |      |      |       |
|------------------------------|----|-----------------------------------------|------------------------------------------------------|------------|----|----|------|------|-------|
| GLMSNGMSQLIGIK               | 18 | 9790161                                 | N-Term(iTRAQ4plex), N5(Deamidated), K14(iTRAQ4plex)  | 1737.95622 | 61 | 85 |      | 4.83 | Expt1 |
| TIAlIAEGIEPALTR              | 29 | 29293809                                | N-Term(iTRAQ4plex)                                   | 1712.01140 | 61 | 77 |      | 3.89 | Expt1 |
| ISNPIDEYFK                   | 21 | 160333372                               | N-Term(iTRAQ4plex), K10(iTRAQ4plex)                  | 1513.82720 | 61 | 63 |      | 3.94 | Expt1 |
| DVDAAYMTK                    | 6  | 113195684                               | N-Term(iTRAQ4plex), K9(iTRAQ4plex)                   | 1301.66802 | 61 | 61 |      | 3.93 | Expt1 |
| GSTASQVLQR                   | 7  | 149258501;19526818                      | N-Term(iTRAQ4plex)                                   | 1190.66338 | 61 | 62 |      | 4.36 | Expt1 |
| STPDPEESPQLTDLAQETEVQAENIK   | 3  | 110431378                               | N-Term(iTRAQ4plex), K27(iTRAQ4plex)                  | 3286.61203 | 61 | 94 |      | 6.15 | Expt1 |
| VGFEVATDLDTGR                | 19 | 169234958;32129201                      | N-Term(iTRAQ4plex)                                   | 1523.78423 | 61 | 69 |      | 4.56 | Expt1 |
| TIAPALVSK                    | 3  | 149249466;149253386;149259350           | N-Term(iTRAQ4plex), K9(iTRAQ4plex)                   | 1187.76433 | 61 | 61 |      | 3.33 | Expt1 |
| VPDGLPSALEQLYLEHNNVYTPDSYFR  | 2  | 10946680                                | N-Term(iTRAQ4plex)                                   | 3380.69236 | 61 |    |      | 4.23 | Expt1 |
| APLDIPVPDPVK                 | 15 | 6755212                                 | N-Term(iTRAQ4plex), K12(iTRAQ4plex)                  | 1548.92546 | 61 | 73 | 1.23 | 4.19 | Expt1 |
| AGIISTVEVLK                  | 5  | 68226731                                | N-Term(iTRAQ4plex), K11(iTRAQ4plex)                  | 1417.89202 | 61 | 65 |      | 4.40 | Expt1 |
| VPDVLVADPPTAR                | 6  | 6679891                                 | N-Term(iTRAQ4plex)                                   | 1493.84490 | 61 | 57 |      | 3.78 | Expt1 |
| LATQLTGPVMPPIR               | 9  | 149251177;149252074;149258092           | N-Term(iTRAQ4plex), M10(Oxidation)                   | 1556.89470 | 61 | 46 |      | 3.80 | Expt1 |
| DGEEAGAYDGPR                 | 10 | 112293264                               | N-Term(iTRAQ4plex)                                   | 1380.61528 | 61 | 54 |      | 4.14 | Expt1 |
| GESLFMGR                     | 8  | 31560359                                | N-Term(iTRAQ4plex)                                   | 1040.53313 | 61 | 44 |      | 3.26 | Expt1 |
| TDLLLEPYNK                   | 9  | 114326446                               | N-Term(iTRAQ4plex), K10(iTRAQ4plex)                  | 1493.85222 | 61 | 65 |      | 4.00 | Expt1 |
| AFQGLLDSYSVR                 | 3  | 31982089                                | N-Term(iTRAQ4plex)                                   | 1499.80046 | 61 | 56 |      | 4.03 | Expt1 |
| DQYELLCLDNTR                 | 9  | 20330802                                | N-Term(iTRAQ4plex), C7(Methylthio)                   | 1672.78240 | 61 | 67 |      | 3.76 | Expt1 |
| FDYIFFTGSPR                  | 11 | 82997826;38084778;94405733              | N-Term(iTRAQ4plex)                                   | 1493.75896 | 61 | 49 |      | 3.62 | Expt1 |
| GVLFGPPGCGK                  | 9  | 225543319;94408011                      | N-Term(iTRAQ4plex), C10(Methylthio), K12(iTRAQ4plex) | 1528.78984 | 61 | 61 |      | 4.07 | Expt1 |
| SLVIDEGEDDLGR                | 6  | 8393066                                 | N-Term(iTRAQ4plex)                                   | 1561.78472 | 61 | 86 |      | 3.61 | Expt1 |
| MFIGLSWDTTK                  | 8  | 116256518;116256514;116256516;116256512 | N-Term(iTRAQ4plex), K12(iTRAQ4plex)                  | 1643.87224 | 61 | 82 |      | 4.06 | Expt1 |
| SLDNNYSTLNER                 | 8  | 146219830;146219849                     | N-Term(iTRAQ4plex)                                   | 1569.76653 | 61 | 79 |      | 4.31 | Expt1 |
| NEGATYAAAVLFR                | 6  | 6671684                                 | N-Term(iTRAQ4plex)                                   | 1625.87674 | 61 | 75 |      | 5.04 | Expt1 |
| GALPLDVTVFYK                 | 8  | 19526463                                | N-Term(iTRAQ4plex), K12(iTRAQ4plex)                  | 1612.92632 | 61 | 71 |      | 3.83 | Expt1 |
| LEALGTGWEEELGR               | 6  | 55926127                                | N-Term(iTRAQ4plex)                                   | 1574.83354 | 61 | 65 |      | 4.19 | Expt1 |
| DPTVEFPPDLCSR                | 9  | 134288917                               | N-Term(iTRAQ4plex), C11(Methylthio)                  | 1665.77580 | 61 | 64 |      | 2.99 | Expt1 |
| FPQLDDTSFANSR                | 5  | 93102409                                | N-Term(iTRAQ4plex)                                   | 1641.80242 | 61 | 59 |      | 2.86 | Expt1 |
| GYEEWLLNEIR                  | 14 | 61097906;11230802;157951643             | N-Term(iTRAQ4plex)                                   | 1565.81194 | 61 | 58 |      | 4.93 | Expt1 |
| ETFLTSPPELYR                 | 14 | 22122515                                | N-Term(iTRAQ4plex)                                   | 1628.83379 | 61 | 57 |      | 4.38 | Expt1 |
| AVFQYIDENQDR                 | 12 | 31981273                                | N-Term(iTRAQ4plex)                                   | 1641.80254 | 61 | 56 |      | 4.18 | Expt1 |
| AAYDEYCSGYNR                 | 15 | 112421039                               | N-Term(iTRAQ4plex), C7(Methylthio)                   | 1601.65154 | 61 | 52 |      | 3.98 | Expt1 |
| SLLLLVCQEPER                 | 3  | 18874094                                | N-Term(iTRAQ4plex), C7(Methylthio)                   | 1589.85698 | 61 | 52 |      | 3.10 | Expt1 |
| AVAEQIPLLQGVVR               | 13 | 227116327                               | N-Term(iTRAQ4plex)                                   | 1636.99016 | 61 | 49 |      | 4.35 | Expt1 |
| LQVTASPSQLCGLR               | 5  | 149255293;149255746;153945747;31982171  | N-Term(iTRAQ4plex), C11(Methylthio)                  | 1662.88017 | 61 | 43 |      | 3.53 | Expt1 |
| IVMAAAAK                     | 6  | 163310769;34328288                      | N-Term(iTRAQ4plex), M3(Oxidation), K8(iTRAQ4plex)    | 1078.66350 | 61 | 46 |      |      | Expt1 |
| FQMPDQGMSTADFFQGTK           | 3  | 40254595                                | N-Term(iTRAQ4plex), K19(iTRAQ4plex)                  | 2439.12650 | 61 | 50 |      | 4.68 | Expt1 |
| EVLAELEALEGR                 | 6  | 28077029                                | N-Term(iTRAQ4plex)                                   | 1472.81084 | 61 | 51 |      | 4.04 | Expt1 |
| FDEILEASDGIMVAR              | 9  | 31981562                                | N-Term(iTRAQ4plex)                                   | 1809.92502 | 61 | 87 |      | 4.59 | Expt1 |
| MGPAMGPALGAGIER              | 15 | 21313308;158186704                      | N-Term(iTRAQ4plex)                                   | 1571.81682 | 61 | 66 |      | 4.85 | Expt1 |
| FSSCIDMGQELLAR               | 4  | 55926127                                | N-Term(iTRAQ4plex), C4(Methylthio)                   | 1759.83501 | 61 | 69 |      | 3.98 | Expt1 |
| TVEEGAETPVYLALLPPDATEPHGQLVR | 5  | 27413160                                | N-Term(iTRAQ4plex)                                   | 3146.65683 | 61 | 46 |      | 4.64 | Expt1 |
| SGLVSFYQDWR                  | 16 | 88196773                                | N-Term(iTRAQ4plex)                                   | 1501.75713 | 60 | 61 |      | 4.31 | Expt1 |
| FLLDHQGLFPPSTDAQGV           | 16 | 225543424;225543420                     | N-Term(iTRAQ4plex)                                   | 2118.07085 | 60 | 47 |      | 4.38 | Expt1 |
| NLVVDDETATSLR                | 19 | 226423922                               | N-Term(iTRAQ4plex)                                   | 1576.83428 | 60 | 64 |      | 3.55 | Expt1 |
| GGVIAGSPAPPELIR              | 6  | 24418933                                | N-Term(iTRAQ4plex)                                   | 1577.91265 | 60 | 52 |      | 3.89 | Expt1 |
| SSGEIVYCGQVFEK               | 17 | 149234111;58037465                      | N-Term(iTRAQ4plex), C8(Methylthio), K14(iTRAQ4plex)  | 1879.91680 | 60 | 71 |      | 4.59 | Expt1 |
| AQYEDIANR                    | 98 | 29789317;20911031;114145561;269914154   | N-Term(iTRAQ4plex)                                   | 1223.61414 | 60 | 65 |      | 3.95 | Expt1 |
| GEGQLSAAER                   | 3  | 33859482                                | N-Term(iTRAQ4plex)                                   | 1161.59929 | 60 | 71 |      | 3.77 | Expt1 |
| DYTYEELLNR                   | 8  | 149258752;14149756                      | N-Term(iTRAQ4plex)                                   | 1459.71929 | 60 | 45 |      | 4.10 | Expt1 |
| FGGEHVPNSPFQVTLAGDQPTVQTPLR  | 3  | 125347376                               | N-Term(iTRAQ4plex)                                   | 3107.60044 | 60 | 53 |      | 6.02 | Expt1 |

|                           |     |                                                                    |                                                      |            |    |    |      |       |       |
|---------------------------|-----|--------------------------------------------------------------------|------------------------------------------------------|------------|----|----|------|-------|-------|
| DLVLSEPSQSLR              | 21  | 115647999                                                          | N-Term(iTRAQ4plex)                                   | 1574.85039 | 60 | 55 | 3.54 | Expt1 |       |
| YGFIEGNVVIPR              | 26  | 85540471;85540466;85540468                                         | N-Term(iTRAQ4plex)                                   | 1507.84119 | 60 | 68 | 4.16 | Expt1 |       |
| EVYQQQQYSGGGR             | 3   | 146260280;6754222                                                  | N-Term(iTRAQ4plex)                                   | 1643.79241 | 60 | 60 | 4.46 | Expt1 |       |
| YVIIPITTFEPGHTGEFLLR      | 2   | 6680846                                                            | N-Term(iTRAQ4plex)                                   | 2334.26987 | 60 |    | 4.23 | Expt1 |       |
| EVDLLEQWIAER              | 12  | 117938332;117938334                                                | N-Term(iTRAQ4plex)                                   | 1646.81828 | 60 | 88 | 4.15 | Expt1 |       |
| VPNNNLPPIPER              | 23  | 160707889                                                          | N-Term(iTRAQ4plex)                                   | 1406.78789 | 60 | 57 | 3.42 | Expt1 |       |
| AEMVVDPETMPYLDIANQTGR     | 3   | 119360354                                                          | N-Term(iTRAQ4plex)                                   | 2494.20920 | 60 | 52 | 3.68 | Expt1 |       |
| LLIVSTPTAR                | 24  | 8394362                                                            | N-Term(iTRAQ4plex)                                   | 1214.75823 | 60 | 46 | 2.99 | Expt1 |       |
| SVNESLNNLFITEEDYQALR      | 12  | 51491845                                                           | N-Term(iTRAQ4plex)                                   | 2499.25339 | 60 | 70 | 4.94 | Expt1 |       |
| EGGGNNLYGEEVMQALEQLK      | 4   | 6680117                                                            | N-Term(iTRAQ4plex), K20(iTRAQ4plex)                  | 2467.24674 | 60 | 68 | 1.22 | 5.74  | Expt1 |
| DIDIEDLEELDPDFIMAK        | 5   | 146219837                                                          | N-Term(iTRAQ4plex), M16(Oxidation), K18(iTRAQ4plex)  | 2425.19730 | 60 | 59 |      | 4.88  | Expt1 |
| SASLDVEPIYTFR             | 3   | 16418469;285402377                                                 | N-Term(iTRAQ4plex)                                   | 1641.86077 | 60 | 46 |      | 3.53  | Expt1 |
| ENLLEEQGSIALR             | 8   | 115496850                                                          | N-Term(iTRAQ4plex)                                   | 1615.88066 | 60 | 72 |      | 4.31  | Expt1 |
| SEIDLLNIR                 | 10  | 31981302;158966670                                                 | N-Term(iTRAQ4plex)                                   | 1216.70268 | 60 | 42 |      | 3.39  | Expt1 |
| SFPDFPIPGVLFGR            | 6   | 118601013                                                          | N-Term(iTRAQ4plex)                                   | 1635.90740 | 60 | 64 |      | 3.75  | Expt1 |
| VEQLEALQR                 | 268 | 163310769                                                          | N-Term(iTRAQ4plex)                                   | 1229.69934 | 60 | 77 | 1.19 | 4.24  | Expt1 |
| GTIEYTVESR                | 6   | 194328702;194328706;18700026;194328708                             | N-Term(iTRAQ4plex)                                   | 1298.67192 | 60 | 62 |      | 3.63  | Expt1 |
| EAESSPFVER                | 16  | 6755863                                                            | N-Term(iTRAQ4plex)                                   | 1294.64031 | 60 | 47 |      | 3.88  | Expt1 |
| ELLVNLNPIAQLASR           | 9   | 13386120                                                           | N-Term(iTRAQ4plex)                                   | 1892.11089 | 60 | 62 |      | 4.36  | Expt1 |
| GDTEQEIQR                 | 3   | 112421039                                                          | N-Term(iTRAQ4plex)                                   | 1219.60808 | 60 | 40 |      | 3.05  | Expt1 |
| MEGGSTEIGAQMPSLEGGLSTSDMK | 4   | 61743961                                                           | N-Term(iTRAQ4plex), K25(iTRAQ4plex)                  | 2801.32981 | 60 | 70 |      | 5.67  | Expt1 |
| FEDESFR                   | 21  | 33469047                                                           | N-Term(iTRAQ4plex)                                   | 1188.52971 | 60 | 39 |      | 3.61  | Expt1 |
| GYYTLGVEGR                | 3   | 93102409                                                           | N-Term(iTRAQ4plex)                                   | 1194.65935 | 60 | 55 |      | 3.07  | Expt1 |
| DLGTDSQIFISR              | 22  | 116089273                                                          | N-Term(iTRAQ4plex)                                   | 1495.78960 | 60 | 76 |      | 4.69  | Expt1 |
| SNLVIDSPIGAKPLPVPELAPFVGR | 6   | 83642836;262231776                                                 | N-Term(iTRAQ4plex), K13(iTRAQ4plex)                  | 3068.78189 | 60 | 33 |      | 5.07  | Expt1 |
| YPLSSLMYTASK              | 7   | 225690566                                                          | N-Term(iTRAQ4plex), K12(iTRAQ4plex)                  | 1648.89250 | 60 | 96 |      | 3.62  | Expt1 |
| VIGSGCNLDSAR              | 24  | 82998325;6678674;6754524;7305229;257743039                         | N-Term(iTRAQ4plex), C6(Methylthio)                   | 1381.67143 | 60 | 78 |      | 4.86  | Expt1 |
| EDAANNYAR                 | 3   | 6755901;34740335;6678465;6678467;51765047;82930560;8394493;6678469 | N-Term(iTRAQ4plex)                                   | 1167.55608 | 60 | 53 |      | 3.44  | Expt1 |
| VAIITDGK                  | 18  | 111074529                                                          | N-Term(iTRAQ4plex), K9(iTRAQ4plex)                   | 1217.76579 | 60 | 68 |      | 3.87  | Expt1 |
| EQFLDGDAWTNR              | 21  | 6680836                                                            | N-Term(iTRAQ4plex)                                   | 1595.76128 | 60 | 54 |      | 4.06  | Expt1 |
| YALTGDEVK                 | 3   | 6677805                                                            | N-Term(iTRAQ4plex), K9(iTRAQ4plex)                   | 1283.71770 | 60 | 46 |      | 3.49  | Expt1 |
| YLSPDATVSTEVR             | 24  | 160707889                                                          | N-Term(iTRAQ4plex)                                   | 1581.82463 | 60 | 57 |      | 4.36  | Expt1 |
| NEVPVPER                  | 57  | 148277039                                                          | N-Term(iTRAQ4plex)                                   | 1182.66240 | 60 | 59 |      | 4.29  | Expt1 |
| VAAGVLCLEAQDK             | 3   | 6671684;28395018                                                   | N-Term(iTRAQ4plex), C7(Methylthio), K13(iTRAQ4plex)  | 1650.88456 | 60 | 45 |      | 3.94  | Expt1 |
| TGENVEDAFLEAAK            | 6   | 18390323                                                           | N-Term(iTRAQ4plex), K14(iTRAQ4plex)                  | 1781.92034 | 60 | 93 |      | 5.06  | Expt1 |
| SVMDATQIAGLNCLR           | 9   | 112293266                                                          | N-Term(iTRAQ4plex), C13(Methylthio)                  | 1781.88701 | 60 | 67 |      | 3.85  | Expt1 |
| SYTITGLQPGTDYK            | 5   | 46849812                                                           | N-Term(iTRAQ4plex), K14(iTRAQ4plex)                  | 1831.96819 | 60 | 67 |      | 4.44  | Expt1 |
| SAGWVPIPIGLLFCCK          | 5   | 20330802                                                           | N-Term(iTRAQ4plex), C13(Methylthio), K14(iTRAQ4plex) | 1838.03061 | 60 | 50 |      | 3.70  | Expt1 |
| MEDGVGCLETAEEAK           | 8   | 114326446                                                          | N-Term(iTRAQ4plex), C7(Methylthio), K15(iTRAQ4plex)  | 1915.87212 | 60 | 90 |      | 4.83  | Expt1 |
| SLYSSSPGGAYVTR            | 14  | 31982755                                                           | N-Term(iTRAQ4plex)                                   | 1588.81108 | 60 | 56 |      | 4.60  | Expt1 |
| DFADMPNLR                 | 28  | 6679166                                                            | N-Term(iTRAQ4plex)                                   | 1222.60137 | 60 | 47 |      | 3.87  | Expt1 |
| LLCGLLSDR                 | 19  | 149256684;6754696                                                  | N-Term(iTRAQ4plex), C3(Methylthio)                   | 1179.63567 | 60 | 50 |      | 3.35  | Expt1 |
| EAINLLEPMTNDPVNYVR        | 10  | 74315975                                                           | N-Term(iTRAQ4plex)                                   | 2232.14092 | 60 | 64 |      | 4.49  | Expt1 |
| QYSIEAALR                 | 6   | 111185907                                                          | N-Term(iTRAQ4plex)                                   | 1194.66106 | 60 | 52 |      | 3.44  | Expt1 |
| VGVPVTETGALTLNR           | 13  | 29126205                                                           | N-Term(iTRAQ4plex)                                   | 1571.89048 | 60 | 91 |      | 3.70  | Expt1 |
| TFPLDVGSVVGYSGR           | 11  | 6755152                                                            | N-Term(iTRAQ4plex)                                   | 1697.90044 | 60 | 89 |      | 3.94  | Expt1 |
| GYAYTIFITEDQAR            | 5   | 149264152;160420299                                                | N-Term(iTRAQ4plex)                                   | 1678.82463 | 60 | 89 |      | 4.13  | Expt1 |
| IYIDCYEIEK                | 6   | 111074529                                                          | N-Term(iTRAQ4plex), C5(Methylthio), K11(iTRAQ4plex)  | 1735.89690 | 60 | 84 |      | 4.06  | Expt1 |
| VTWDSFFCAVNPR             | 10  | 31542413                                                           | N-Term(iTRAQ4plex), C8(Methylthio)                   | 1671.77825 | 60 | 80 |      | 4.30  | Expt1 |
| TLPAQGMGTAEVLER           | 7   | 31543694                                                           | N-Term(iTRAQ4plex)                                   | 1716.91045 | 60 | 79 |      | 3.72  | Expt1 |
| LSGVSVSSDAFFPFR           | 6   | 149234067                                                          | N-Term(iTRAQ4plex)                                   | 1759.91716 | 60 | 76 |      | 4.47  | Expt1 |
| EIDQEAAVEVSQRLR           | 5   | 13385168                                                           | N-Term(iTRAQ4plex)                                   | 1730.91155 | 60 | 75 |      | 4.10  | Expt1 |

|                           |    |                                                                                                     |                                                                    |            |    |    |      |      |       |
|---------------------------|----|-----------------------------------------------------------------------------------------------------|--------------------------------------------------------------------|------------|----|----|------|------|-------|
| EEEAGPALALSLIER           | 12 | 9790167                                                                                             | N-Term(iTRAQ4plex)                                                 | 1741.94890 | 60 | 70 |      | 3.93 | Expt1 |
| LNVAPVSDIIEIK             | 16 | 227500281                                                                                           | N-Term(iTRAQ4plex), K13(iTRAQ4plex)                                | 1699.03508 | 60 | 70 |      | 3.93 | Expt1 |
| FLEESVMSPEER              | 5  | 15809026;139948802                                                                                  | N-Term(iTRAQ4plex)                                                 | 1683.80571 | 60 | 69 |      | 4.12 | Expt1 |
| VCPFAGILENGIVR            | 6  | 160358825                                                                                           | N-Term(iTRAQ4plex), C2(Methylthio), N10(Deamidated)                | 1678.88176 | 60 | 69 |      | 3.92 | Expt1 |
| DFDFNGFNVELR              | 11 | 7305075                                                                                             | N-Term(iTRAQ4plex)                                                 | 1728.88896 | 60 | 65 |      | 4.53 | Expt1 |
| VAAAESMPLLLECAR           | 12 | 29789199                                                                                            | N-Term(iTRAQ4plex), C13(Methylthio)                                | 1763.90337 | 60 | 62 |      | 4.17 | Expt1 |
| LEIGVQSVYEDVAR            | 3  | 33469023                                                                                            | N-Term(iTRAQ4plex)                                                 | 1721.92815 | 60 | 61 |      | 3.68 | Expt1 |
| MISSYVGENAEFER            | 8  | 18266680                                                                                            | N-Term(iTRAQ4plex)                                                 | 1775.84111 | 60 | 59 |      | 4.09 | Expt1 |
| YVQELPLETDGALR            | 23 | 225543183                                                                                           | N-Term(iTRAQ4plex)                                                 | 1747.93816 | 60 | 59 |      | 4.39 | Expt1 |
| ADDTFEALR                 | 6  | 13385800                                                                                            | N-Term(iTRAQ4plex)                                                 | 1181.59294 | 60 | 51 |      | 3.82 | Expt1 |
| ESAYLYAR                  | 32 | 6679166                                                                                             | N-Term(iTRAQ4plex)                                                 | 1116.58196 | 60 | 58 |      | 3.26 | Expt1 |
| ETVTQRPGATVPTDFATFPSSAFLR | 2  | 118601017                                                                                           | N-Term(iTRAQ4plex)                                                 | 2840.47483 | 60 |    |      | 5.07 | Expt1 |
| VLVDINNPELIQTAK           | 14 | 6671702                                                                                             | N-Term(iTRAQ4plex), K16(iTRAQ4plex)                                | 2052.19536 | 60 | 61 |      | 4.96 | Expt1 |
| VLFASQEIPASPF             | 7  | 145966915                                                                                           | N-Term(iTRAQ4plex)                                                 | 1705.94390 | 60 | 69 | 1.21 | 4.41 | Expt1 |
| ADPEAAWEPTAEAR            | 3  | 7709986                                                                                             | N-Term(iTRAQ4plex)                                                 | 1786.83647 | 60 | 81 |      | 3.97 | Expt1 |
| VFLDPNTLSDDGTVLR          | 5  | 6755152                                                                                             | N-Term(iTRAQ4plex)                                                 | 1977.04557 | 60 | 65 |      | 4.19 | Expt1 |
| WGTDEAQFIYILGNR           | 12 | 31981302;158966670                                                                                  | N-Term(iTRAQ4plex)                                                 | 1926.98955 | 60 | 95 |      | 4.63 | Expt1 |
| GDTDQASNILASFGLSAR        | 7  | 25141233                                                                                            | N-Term(iTRAQ4plex)                                                 | 1966.99260 | 60 | 91 |      | 4.72 | Expt1 |
| NLTNPNTVIILIGNK           | 8  | 18390323                                                                                            | N-Term(iTRAQ4plex), K15(iTRAQ4plex)                                | 1912.14786 | 60 | 48 |      | 4.58 | Expt1 |
| ILAAATVDNANVLLQIDNAR      | 3  | 21489935                                                                                            | N-Term(iTRAQ4plex)                                                 | 2168.22416 | 59 | 76 |      | 5.70 | Expt1 |
| YGDLANWMIPIGK             | 3  | 18266680                                                                                            | N-Term(iTRAQ4plex), K12(iTRAQ4plex)                                | 1652.87419 | 59 | 74 |      | 3.70 | Expt1 |
| LEGLTDEINFLR              | 5  | 114145561                                                                                           | N-Term(iTRAQ4plex)                                                 | 1563.85771 | 59 | 54 |      | 4.54 | Expt1 |
| VNIIGEVDQGSTDLK           | 8  | 31542111;255759888;255759890                                                                        | N-Term(iTRAQ4plex), K16(iTRAQ4plex)                                | 1975.10039 | 59 | 74 |      | 3.94 | Expt1 |
| TIPAWATLSASQLAR           | 11 | 171543869;171543871                                                                                 | N-Term(iTRAQ4plex)                                                 | 1729.97698 | 59 | 91 |      | 4.40 | Expt1 |
| ELEDVTEAESMNR             | 8  | 29336026                                                                                            | N-Term(iTRAQ4plex)                                                 | 1753.80083 | 59 | 53 |      | 4.50 | Expt1 |
| GLVSSDELAK                | 3  | 115496850                                                                                           | N-Term(iTRAQ4plex), K10(iTRAQ4plex)                                | 1306.74016 | 59 | 74 |      | 4.00 | Expt1 |
| SAEFGNSLQSSR              | 5  | 124249090                                                                                           | N-Term(iTRAQ4plex)                                                 | 1426.70818 | 59 | 74 |      | 4.24 | Expt1 |
| GASYLLMGQVEENR            | 18 | 125490382                                                                                           | N-Term(iTRAQ4plex)                                                 | 1710.86321 | 59 | 89 |      | 4.97 | Expt1 |
| AVEYLLMGIPIGDR            | 6  | 171906578                                                                                           | N-Term(iTRAQ4plex), M7(Oxidation)                                  | 1593.84661 | 59 | 54 |      | 3.11 | Expt1 |
| VTLPAGPDILR               | 20 | 30725780                                                                                            | N-Term(iTRAQ4plex)                                                 | 1295.77910 | 59 | 55 |      | 3.72 | Expt1 |
| SAMPVDAPICLR              | 14 | 10946680                                                                                            | N-Term(iTRAQ4plex), M3(Oxidation), C10(Methylthio)                 | 1478.72673 | 59 | 60 |      | 3.49 | Expt1 |
| EPFPTIYVDSQK              | 3  | 219276601;219275596                                                                                 | N-Term(iTRAQ4plex), K12(iTRAQ4plex)                                | 1711.91826 | 59 | 87 |      | 4.22 | Expt1 |
| VIPLFSQCGEGR              | 20 | 6724311                                                                                             | N-Term(iTRAQ4plex), C9(Methylthio), C12(Methylthio)                | 1684.78301 | 59 | 71 |      | 4.66 | Expt1 |
| YYTLEEIQK                 | 10 | 13385268                                                                                            | N-Term(iTRAQ4plex), K9(iTRAQ4plex)                                 | 1474.80705 | 59 | 71 |      | 3.95 | Expt1 |
| SFGSAVLTR                 | 46 | 6680710                                                                                             | N-Term(iTRAQ4plex)                                                 | 1081.61267 | 59 | 70 |      | 3.50 | Expt1 |
| TVFGVEPDLTR               | 7  | 31981273                                                                                            | N-Term(iTRAQ4plex)                                                 | 1377.75029 | 59 | 46 |      | 4.06 | Expt1 |
| VGINDFCPMGFVK             | 17 | 20137008                                                                                            | N-Term(iTRAQ4plex), C7(Methylthio), M9(Oxidation), K14(iTRAQ4plex) | 1833.89971 | 59 | 87 |      | 4.13 | Expt1 |
| SSSLSDPLEESSPIAIFDNTENLEK | 6  | 82950147;82950149;149264086                                                                         | N-Term(iTRAQ4plex), K25(iTRAQ4plex)                                | 2967.49509 | 59 | 88 |      | 5.81 | Expt1 |
| EQGYIFGDYIER              | 3  | 159110717                                                                                           | N-Term(iTRAQ4plex)                                                 | 1633.80193 | 59 | 43 |      | 3.93 | Expt1 |
| QLLVEAIDVPVGTATLGR        | 6  | 110735428;110735426                                                                                 | N-Term(iTRAQ4plex)                                                 | 1996.15642 | 59 | 81 |      | 4.25 | Expt1 |
| GLFIIDAK                  | 3  | 148747558                                                                                           | N-Term(iTRAQ4plex), K8(iTRAQ4plex)                                 | 1164.72832 | 59 | 56 |      | 3.38 | Expt1 |
| GGPPFAFVEFEDPRDAEDAVYGR   | 2  | 149262253;118582271                                                                                 | N-Term(iTRAQ4plex)                                                 | 2685.28086 | 59 |    |      | 4.44 | Expt1 |
| FAEAFEIPR                 | 8  | 126723461                                                                                           | N-Term(iTRAQ4plex)                                                 | 1294.69438 | 59 | 48 |      | 3.90 | Expt1 |
| LVSQDNFGDLPVAAATK         | 5  | 117938332;117938334                                                                                 | N-Term(iTRAQ4plex), K19(iTRAQ4plex)                                | 2310.22391 | 59 | 53 |      | 4.63 | Expt1 |
| LSVEEAVAAGVVGGEIQEK       | 9  | 37537522                                                                                            | N-Term(iTRAQ4plex), K19(iTRAQ4plex)                                | 2173.20073 | 59 | 72 |      | 5.16 | Expt1 |
| FPGQLNADLR                | 24 | 33859488;31981939;7106439;2165384;21746161;149253488;149253527;83030206;124430500;27754056;12963615 | N-Term(iTRAQ4plex)                                                 | 1274.70000 | 59 | 45 |      | 3.46 | Expt1 |
| MPTPPSYK                  | 6  | 6678359                                                                                             | N-Term(iTRAQ4plex), K8(iTRAQ4plex)                                 | 1208.66130 | 59 | 43 |      |      | Expt1 |
| DESSPYAAMLAAQDVAQR        | 6  | 31981100                                                                                            | N-Term(iTRAQ4plex)                                                 | 2066.99540 | 59 | 62 |      | 4.88 | Expt1 |
| NIGDINQDGYPIAVGAPYDDLK    | 5  | 31982236                                                                                            | N-Term(iTRAQ4plex), K24(iTRAQ4plex)                                | 2808.39896 | 59 | 89 |      | 6.34 | Expt1 |
| YDEMVESMK                 | 6  | 226874906                                                                                           | N-Term(iTRAQ4plex), K9(iTRAQ4plex)                                 | 1419.67827 | 59 | 61 |      | 3.89 | Expt1 |
| GDSVSDNGSEAVR             | 3  | 110625656;270309161                                                                                 | N-Term(iTRAQ4plex), N7(Deamidated)                                 | 1437.66045 | 59 | 56 |      | 3.85 | Expt1 |

|                   |     |                                                                                                      |                                                                     |            |    |     |      |       |
|-------------------|-----|------------------------------------------------------------------------------------------------------|---------------------------------------------------------------------|------------|----|-----|------|-------|
| ALQTILSQPVTYEAYR  | 8   | 23943828                                                                                             | N-Term(iTRAQ4plex)                                                  | 1997.08463 | 59 | 60  | 4.36 | Expt1 |
| GAQGVLVYDVTR      | 11  | 30841008                                                                                             | N-Term(iTRAQ4plex)                                                  | 1534.87456 | 59 | 64  | 4.74 | Expt1 |
| TPGPGAQSALR       | 9   | 31981100;63680339;149267017                                                                          | N-Term(iTRAQ4plex)                                                  | 1198.66789 | 59 | 52  | 3.16 | Expt1 |
| GCFSQLVK          | 6   | 148277039                                                                                            | N-Term(iTRAQ4plex), C2(Methylthio), K8(iTRAQ4plex)                  | 1215.64165 | 59 | 56  | 3.57 | Expt1 |
| DIVQFVPPR         | 22  | 149269167;25141335;6753510;226052679;28416905;58037333;23346611;25470894;21630253;23943807           | N-Term(iTRAQ4plex)                                                  | 1264.71904 | 59 | 42  | 3.62 | Expt1 |
| DIPNMFMSAGGLGK    | 6   | 23956396                                                                                             | N-Term(iTRAQ4plex), K15(iTRAQ4plex)                                 | 1840.92583 | 59 | 101 | 4.25 | Expt1 |
| DIVVQETMEDIDK     | 3   | 6680840;41282022                                                                                     | N-Term(iTRAQ4plex), K13(iTRAQ4plex)                                 | 1822.94682 | 59 | 87  | 4.46 | Expt1 |
| ELEVAESDQVELER    | 13  | 7949018                                                                                              | N-Term(iTRAQ4plex)                                                  | 1846.91948 | 59 | 77  | 3.98 | Expt1 |
| LMTDTINEPILLCR    | 7   | 219276601;219275596                                                                                  | N-Term(iTRAQ4plex), C13(Methylthio)                                 | 1821.94243 | 59 | 72  | 4.26 | Expt1 |
| MCDLVSDFDGFSEK    | 18  | 31560737                                                                                             | N-Term(iTRAQ4plex), C2(Methylthio)                                  | 1810.76335 | 59 | 56  | 1.68 | Expt1 |
| VPSENVLGEVGDGFK   | 3   | 23956084                                                                                             | N-Term(iTRAQ4plex), K15(iTRAQ4plex)                                 | 1834.98174 | 59 | 56  | 3.39 | Expt1 |
| LFVGGAPPEFQPSPLR  | 5   | 117647249                                                                                            | N-Term(iTRAQ4plex)                                                  | 1856.01714 | 59 | 54  | 3.58 | Expt1 |
| IIDLIPDGYQISCLPK  | 3   | 6680744                                                                                              | N-Term(iTRAQ4plex), C14(Methylthio), K17(iTRAQ4plex)                | 2219.21189 | 59 | 46  | 3.79 | Expt1 |
| ISGLIYEETR        | 51  | 149263932;94378251                                                                                   | N-Term(iTRAQ4plex)                                                  | 1324.72576 | 59 | 62  | 4.01 | Expt1 |
| VGLIGSCTNSSYEDMGR | 5   | 18079339                                                                                             | N-Term(iTRAQ4plex), C7(Methylthio)                                  | 1978.88066 | 59 | 95  | 4.77 | Expt1 |
| LDIDSAPITAR       | 43  | 31981562                                                                                             | N-Term(iTRAQ4plex)                                                  | 1315.73625 | 59 | 65  | 4.21 | Expt1 |
| NFYQPSSESLAYK     | 13  | 94400773                                                                                             | N-Term(iTRAQ4plex), K13(iTRAQ4plex)                                 | 1821.93010 | 59 | 82  | 5.15 | Expt1 |
| CECPNGMTLDATGR    | 5   | 118197277                                                                                            | N-Term(iTRAQ4plex), C1(Methylthio), C3(Methylthio), N5(Deamidated)  | 1704.66460 | 59 | 65  | 3.50 | Expt1 |
| IDTIEITDR         | 28  | 149274531;32880197;109134362                                                                         | N-Term(iTRAQ4plex)                                                  | 1332.75334 | 59 | 60  | 4.41 | Expt1 |
| SIPMTVDFIR        | 3   | 96975138                                                                                             | N-Term(iTRAQ4plex)                                                  | 1322.72637 | 59 | 48  | 2.94 | Expt1 |
| GPQVSSSLNLDTSK    | 3   | 61743961                                                                                             | N-Term(iTRAQ4plex), K14(iTRAQ4plex)                                 | 1720.94341 | 59 | 84  | 4.44 | Expt1 |
| FVLINWTEGVDNDR    | 15  | 7304993;226423871;226423873                                                                          | N-Term(iTRAQ4plex)                                                  | 1862.99272 | 59 | 82  | 4.21 | Expt1 |
| LEMEIETYR         | 100 | 118130981                                                                                            | N-Term(iTRAQ4plex)                                                  | 1327.67034 | 59 | 56  | 4.16 | Expt1 |
| AGGIETIANEYSDR    | 8   | 112293266                                                                                            | N-Term(iTRAQ4plex)                                                  | 1639.80535 | 59 | 73  | 4.31 | Expt1 |
| DMLEASILDYLGK     | 12  | 126723461                                                                                            | N-Term(iTRAQ4plex), K14(iTRAQ4plex)                                 | 1856.99932 | 59 | 87  | 4.62 | Expt1 |
| VAIGQSDEGER       | 10  | 82997826;38084778;94405733;83019564;34328288                                                         | N-Term(iTRAQ4plex)                                                  | 1361.67839 | 59 | 66  | 3.85 | Expt1 |
| SNEDQSMGNWQIR     | 11  | 9506843;162287370;161760667                                                                          | N-Term(iTRAQ4plex)                                                  | 1708.78264 | 59 | 81  | 4.26 | Expt1 |
| VVFDDTYDR         | 37  | 31982861                                                                                             | N-Term(iTRAQ4plex)                                                  | 1273.62029 | 59 | 46  | 3.85 | Expt1 |
| DGNFGVSAELR       | 22  | 13386230                                                                                             | N-Term(iTRAQ4plex), N3(Deamidated)                                  | 1380.68926 | 59 | 74  | 3.73 | Expt1 |
| APSWIDTGLSEMR     | 5   | 6753530                                                                                              | N-Term(iTRAQ4plex)                                                  | 1606.80498 | 59 | 46  | 4.18 | Expt1 |
| LLQLQEQMR         | 9   | 82950147;82950149;149264086                                                                          | N-Term(iTRAQ4plex)                                                  | 1302.73357 | 59 | 44  | 3.27 | Expt1 |
| TAVETAVLLLR       | 20  | 6753320                                                                                              | N-Term(iTRAQ4plex)                                                  | 1329.82646 | 59 | 65  | 4.09 | Expt1 |
| FVMQEEFSR         | 12  | 112293264                                                                                            | N-Term(iTRAQ4plex)                                                  | 1316.64238 | 59 | 33  | 3.52 | Expt1 |
| TLNEADCATVPPAIR   | 5   | 54607098                                                                                             | N-Term(iTRAQ4plex), C7(Methylthio)                                  | 1760.88640 | 59 | 103 | 4.99 | Expt1 |
| LAEMPADSGYPAYLGAR | 12  | 31560731                                                                                             | N-Term(iTRAQ4plex)                                                  | 1925.95659 | 59 | 73  | 4.44 | Expt1 |
| LLPELEVLK         | 16  | 111185907                                                                                            | N-Term(iTRAQ4plex)                                                  | 1225.76653 | 59 | 44  | 3.32 | Expt1 |
| LAVNMVPPR         | 24  | 33859488;31981939;7106439;22165384;21746161;149253488;149253527;83030206;124430500;27754056;12963615 | N-Term(iTRAQ4plex)                                                  | 1287.73943 | 59 | 48  | 3.84 | Expt1 |
| INEAFDLLR         | 27  | 6724311                                                                                              | N-Term(iTRAQ4plex)                                                  | 1234.69512 | 59 | 43  | 3.68 | Expt1 |
| YELGSLAVLR        | 6   | 149253040;183979966                                                                                  | N-Term(iTRAQ4plex)                                                  | 1321.76128 | 58 | 70  | 3.29 | Expt1 |
| DFYGEDAK          | 13  | 163310769                                                                                            | N-Term(iTRAQ4plex), K8(iTRAQ4plex)                                  | 1232.61553 | 58 | 49  | 2.98 | Expt1 |
| ECYCPDPFSAFYCDNR  | 26  | 229608920                                                                                            | N-Term(iTRAQ4plex), C2(Methylthio), C4(Methylthio), C14(Methylthio) | 2247.84868 | 58 | 75  | 4.51 | Expt1 |
| FSCMCPQGYEVVR     | 12  | 149261823;164607147                                                                                  | N-Term(iTRAQ4plex), C3(Methylthio), C5(Methylthio)                  | 1754.73564 | 58 | 54  | 4.36 | Expt1 |

|                       |    |                                                                                                                                                                                    |                                                     |            |    |    |      |      |       |
|-----------------------|----|------------------------------------------------------------------------------------------------------------------------------------------------------------------------------------|-----------------------------------------------------|------------|----|----|------|------|-------|
| GTGIVSAPVPK           | 5  | 82890069;149253083;82898647;82902507;94383782;94383784;149259263;63594466;149263154;149265803;94401827;82993808;94402540;149269353;94404463                                        | N-Term(iTRAQ4plex), K11(iTRAQ4plex)                 | 1313.80547 | 58 | 58 |      | 4.20 | Expt1 |
| EQYEIAIEK             | 6  | 6754480;226823220                                                                                                                                                                  | N-Term(iTRAQ4plex), K9(iTRAQ4plex)                  | 1368.73699 | 58 | 44 |      | 3.60 | Expt1 |
| FQSSMSYGGFGAGSCQLGGGR | 17 | 6754480                                                                                                                                                                            | N-Term(iTRAQ4plex), M6(Oxidation), C17(Methylthio)  | 2404.03122 | 58 | 95 |      | 7.94 | Expt1 |
| GGIVDEGALLR           | 20 | 52353955                                                                                                                                                                           | N-Term(iTRAQ4plex)                                  | 1243.71672 | 58 | 57 |      | 3.95 | Expt1 |
| DCDLDVACR             | 88 | 163310769;75677435                                                                                                                                                                 | N-Term(iTRAQ4plex), C2(Methylthio), C8(Methylthio)  | 1245.48516 | 58 | 55 |      | 3.94 | Expt1 |
| GPLPAAPTAPER          | 11 | 34610241;34610235;34610233                                                                                                                                                         | N-Term(iTRAQ4plex)                                  | 1417.79131 | 58 | 42 |      | 3.25 | Expt1 |
| FQSVESGANNVVFIR       | 3  | 149258050                                                                                                                                                                          | N-Term(iTRAQ4plex)                                  | 1810.95879 | 58 | 82 |      | 3.64 | Expt1 |
| DNADGTQVEYTPFEK       | 4  | 145966915                                                                                                                                                                          | N-Term(iTRAQ4plex), K16(iTRAQ4plex)                 | 2165.03618 | 58 | 75 |      | 4.42 | Expt1 |
| LYDAYELK              | 5  | 6753060                                                                                                                                                                            | N-Term(iTRAQ4plex), K8(iTRAQ4plex)                  | 1302.72820 | 58 | 45 |      | 3.48 | Expt1 |
| VAMANIQPQLMVGATSIAR   | 2  | 31543942                                                                                                                                                                           | N-Term(iTRAQ4plex)                                  | 2186.19541 | 58 |    |      | 3.40 | Expt1 |
| CVGVGSDGSIWNPDGIDPK   | 2  | 6680027                                                                                                                                                                            | N-Term(iTRAQ4plex), C1(Methylthio), K20(iTRAQ4plex) | 2379.12302 | 58 |    |      | 4.75 | Expt1 |
| YEWLDVAEAR            | 13 | 149253258;33859482                                                                                                                                                                 | N-Term(iTRAQ4plex)                                  | 1282.61894 | 58 | 49 |      | 3.43 | Expt1 |
| ATQALVLAPTR           | 12 | 21450625;149270417;226823309                                                                                                                                                       | N-Term(iTRAQ4plex)                                  | 1284.77812 | 58 | 69 |      | 3.98 | Expt1 |
| FGSNTVMR              | 10 | 82950147;82950149;149264086                                                                                                                                                        | N-Term(iTRAQ4plex)                                  | 1170.57170 | 58 | 49 |      | 3.19 | Expt1 |
| TTLSTFQSPFSVTR        | 5  | 18034769                                                                                                                                                                           | N-Term(iTRAQ4plex)                                  | 1844.95574 | 58 | 66 |      | 4.59 | Expt1 |
| QASGGPVDIGPEYQQDLDR   | 11 | 94397536                                                                                                                                                                           | N-Term(iTRAQ4plex)                                  | 2189.05680 | 58 | 58 |      | 5.25 | Expt1 |
| EVGVDVNFPPK           | 5  | 61743961                                                                                                                                                                           | N-Term(iTRAQ4plex), K10(iTRAQ4plex)                 | 1391.78325 | 58 | 63 |      | 3.88 | Expt1 |
| VNFTVDQIR             | 11 | 33859482                                                                                                                                                                           | N-Term(iTRAQ4plex)                                  | 1235.68877 | 58 | 54 |      |      | Expt1 |
| MSINAEDVVVGLVEVK      | 7  | 21450277                                                                                                                                                                           | N-Term(iTRAQ4plex), K17(iTRAQ4plex)                 | 2105.14751 | 58 | 81 |      | 4.46 | Expt1 |
| GDEGIFEEFSIEER        | 10 | 160333832;160333829;160333835                                                                                                                                                      | N-Term(iTRAQ4plex)                                  | 1800.84221 | 58 | 77 |      | 5.16 | Expt1 |
| NQPPVDEGATGASQSLDR    | 6  | 6755438                                                                                                                                                                            | N-Term(iTRAQ4plex)                                  | 2099.04508 | 58 | 66 |      | 4.69 | Expt1 |
| LQVTPDSDGEYVCR        | 10 | 149253040;183979966                                                                                                                                                                | N-Term(iTRAQ4plex), C14(Methylthio)                 | 1870.91936 | 58 | 65 |      | 4.07 | Expt1 |
| GDVDVSIPIEGDLK        | 11 | 61743961                                                                                                                                                                           | N-Term(iTRAQ4plex), K15(iTRAQ4plex)                 | 1859.00859 | 58 | 83 |      | 4.17 | Expt1 |
| IETIEVMEDR            | 33 | 82801284;94371439;149252089;82918363;82918359;82954743;149266199;82954739;149266543;149266545;82956957;51769129;149266569;82957137;94400765;149268214;149268216;37674277;157277969 | N-Term(iTRAQ4plex)                                  | 1378.70293 | 58 | 65 |      | 4.25 | Expt1 |
| AQYEDIAQR             | 50 | 54607171;113195684                                                                                                                                                                 | N-Term(iTRAQ4plex)                                  | 1237.63086 | 58 | 71 |      | 3.89 | Expt1 |
| TELDLDIIR             | 2  | 70909345                                                                                                                                                                           | N-Term(iTRAQ4plex)                                  | 1233.64433 | 58 |    |      | 3.51 | Expt1 |
| GYFIQPTVFGDVK         | 14 | 6753036                                                                                                                                                                            | N-Term(iTRAQ4plex), K13(iTRAQ4plex)                 | 1758.96745 | 58 | 66 |      | 4.28 | Expt1 |
| VVLPMLPIR             | 10 | 34538601;167716840                                                                                                                                                                 | N-Term(iTRAQ4plex)                                  | 1310.80083 | 58 | 50 |      | 3.37 | Expt1 |
| LVPDMIPVVSEQVSSYLSK   | 3  | 31981273                                                                                                                                                                           | N-Term(iTRAQ4plex), K20(iTRAQ4plex)                 | 2508.35776 | 58 | 73 |      | 5.04 | Expt1 |
| DVQELYAAGENR          | 19 | 149265356;149265358;160707921                                                                                                                                                      | N-Term(iTRAQ4plex)                                  | 1508.74614 | 58 | 68 |      | 4.54 | Expt1 |
| TGQPMINLYTDR          | 7  | 20982845                                                                                                                                                                           | N-Term(iTRAQ4plex)                                  | 1552.79106 | 58 | 63 |      | 3.96 | Expt1 |
| GSVAPSQMDEVDFSR       | 5  | 149255330                                                                                                                                                                          | N-Term(iTRAQ4plex)                                  | 1867.90398 | 58 | 77 |      | 4.06 | Expt1 |
| GEAGDEGNAGPDGAPGER    | 7  | 6753484                                                                                                                                                                            | N-Term(iTRAQ4plex)                                  | 1799.79180 | 58 | 98 |      | 5.65 | Expt1 |
| EQEAEEAETPSTEEK       | 3  | 21312256                                                                                                                                                                           | N-Term(iTRAQ4plex), K15(iTRAQ4plex)                 | 1994.93120 | 58 | 97 |      | 5.26 | Expt1 |
| SDSLAGVVIADSEYPSR     | 3  | 31543971                                                                                                                                                                           | N-Term(iTRAQ4plex)                                  | 1909.96306 | 58 | 88 |      | 4.76 | Expt1 |
| GMVDGPFVLDLTTTPK      | 7  | 209862992;6681219                                                                                                                                                                  | N-Term(iTRAQ4plex), K15(iTRAQ4plex)                 | 1929.99602 | 58 | 80 |      | 4.22 | Expt1 |
| NAPELSTPSSQLMAEK      | 5  | 161484644                                                                                                                                                                          | N-Term(iTRAQ4plex), K16(iTRAQ4plex)                 | 1991.03813 | 58 | 78 |      | 4.58 | Expt1 |
| GFQFVSSSLPDIICYR      | 11 | 157909782;7304969;157909784                                                                                                                                                        | N-Term(iTRAQ4plex), C13(Methylthio)                 | 1908.91423 | 58 | 76 |      | 3.84 | Expt1 |
| LVLQVESLTTLSAER       | 12 | 29336026                                                                                                                                                                           | N-Term(iTRAQ4plex)                                  | 1932.07981 | 58 | 76 | 1.23 | 4.78 | Expt1 |
| ALPWFNIEVPQIK         | 25 | 114326546                                                                                                                                                                          | N-Term(iTRAQ4plex), K14(iTRAQ4plex)                 | 1972.11357 | 58 | 66 |      | 4.68 | Expt1 |
| QITQVYWFYDECLR        | 25 | 9790175;8394024;149258657;9506983                                                                                                                                                  | N-Term(iTRAQ4plex), C12(Methylthio)                 | 1924.90849 | 58 | 64 |      | 4.55 | Expt1 |

|                             |     |                                       |                                                                     |            |    |     |  |      |       |
|-----------------------------|-----|---------------------------------------|---------------------------------------------------------------------|------------|----|-----|--|------|-------|
| LEGNPIALGK                  | 6   | 6679166                               | N-Term(iTRAQ4plex), K10(iTRAQ4plex)                                 | 1299.79082 | 58 | 63  |  | 3.87 | Expt1 |
| QALQDLLSEYMGNAGR            | 13  | 6753294                               | N-Term(iTRAQ4plex)                                                  | 1909.95708 | 58 | 62  |  | 4.30 | Expt1 |
| TFSNWPTYPLQYVR              | 3   | 31981269                              | N-Term(iTRAQ4plex)                                                  | 1915.98516 | 58 | 48  |  | 4.30 | Expt1 |
| TMQNTSDLDTAR                | 18  | 28395018                              | N-Term(iTRAQ4plex)                                                  | 1496.71489 | 58 | 75  |  | 4.55 | Expt1 |
| TQMLDQEELLASTR              | 10  | 61657921                              | N-Term(iTRAQ4plex)                                                  | 1778.90654 | 58 | 77  |  | 4.79 | Expt1 |
| DLFLDVDK                    | 5   | 111185907                             | N-Term(iTRAQ4plex), K8(iTRAQ4plex)                                  | 1252.69707 | 58 | 48  |  | 3.44 | Expt1 |
| LNCEIDIDECR                 | 13  | 149261823;164607147                   | N-Term(iTRAQ4plex), C3(Methylthio), C9(Methylthio)                  | 1445.56670 | 58 | 58  |  | 3.95 | Expt1 |
| AEILSNWNMFVGSQATNYGEDLTR    | 5   | 188035858                             | N-Term(iTRAQ4plex)                                                  | 2860.37821 | 58 | 89  |  | 5.77 | Expt1 |
| EALENEFK                    | 3   | 6754090                               | N-Term(iTRAQ4plex), K8(iTRAQ4plex)                                  | 1267.68840 | 58 | 50  |  | 3.46 | Expt1 |
| TVENVTVFGTASASK             | 7   | 33859662                              | N-Term(iTRAQ4plex), K15(iTRAQ4plex)                                 | 1798.98870 | 58 | 108 |  | 4.89 | Expt1 |
| LGAAPPEESAYVAGER            | 10  | 38198665                              | N-Term(iTRAQ4plex)                                                  | 1792.88384 | 58 | 88  |  | 4.71 | Expt1 |
| LIATFPDLTY SAYR             | 9   | 31982236                              | N-Term(iTRAQ4plex)                                                  | 1876.00530 | 58 | 73  |  | 4.82 | Expt1 |
| NVGLDIEAEVPAVK              | 3   | 126723461                             | N-Term(iTRAQ4plex), K14(iTRAQ4plex)                                 | 1742.00425 | 58 |     |  | 4.09 | Expt1 |
| GFGDGYNGYGGPGGGNFGGSPGYGGGR | 10  | 149274531;109134362                   | N-Term(iTRAQ4plex), N7(Deamidated)                                  | 2640.12505 | 58 | 102 |  | 5.26 | Expt1 |
| LSPPYSSPQFAQDVGR            | 18  | 170295840                             | N-Term(iTRAQ4plex)                                                  | 2022.00701 | 58 | 99  |  | 4.38 | Expt1 |
| YLAEFATGNDR                 | 31  | 226874906                             | N-Term(iTRAQ4plex)                                                  | 1400.69438 | 58 | 62  |  | 3.87 | Expt1 |
| GYFNEELSEILSDPDDTK          | 14  | 82950147;82950149;149264086           | N-Term(iTRAQ4plex), K19(iTRAQ4plex)                                 | 2447.18291 | 58 | 80  |  | 5.49 | Expt1 |
| IANPVEGSTDR                 | 15  | 157042772;157041229;157057549         | N-Term(iTRAQ4plex)                                                  | 1302.67632 | 58 | 55  |  | 3.57 | Expt1 |
| NITNELLQIEPEK               | 17  | 112421039                             | N-Term(iTRAQ4plex), K13(iTRAQ4plex)                                 | 1829.03618 | 58 | 86  |  | 5.04 | Expt1 |
| GTVCAANDFNPDADAK            | 10  | 31981302;158966670                    | N-Term(iTRAQ4plex), C4(Methylthio), K16(iTRAQ4plex)                 | 1942.88664 | 58 | 98  |  | 5.42 | Expt1 |
| DVEDEETWIR                  | 3   | 115496850                             | N-Term(iTRAQ4plex)                                                  | 1435.68523 | 58 | 51  |  | 3.68 | Expt1 |
| EVYELLDTPGR                 | 11  | 13385434                              | N-Term(iTRAQ4plex)                                                  | 1435.75640 | 58 | 57  |  | 4.04 | Expt1 |
| YEELQQTAGR                  | 138 | 20911031                              | N-Term(iTRAQ4plex)                                                  | 1338.68022 | 58 | 66  |  | 4.66 | Expt1 |
| QSTSFLVLQEILSDGK            | 9   | 158635992                             | N-Term(iTRAQ4plex), K17(iTRAQ4plex)                                 | 2182.19364 | 58 | 58  |  | 4.82 | Expt1 |
| VLVVVDGR                    | 82  | 111074529                             | N-Term(iTRAQ4plex)                                                  | 1101.67432 | 58 | 62  |  | 3.20 | Expt1 |
| ETLLDAIR                    | 9   | 226423922                             | N-Term(iTRAQ4plex)                                                  | 1074.62566 | 58 | 41  |  | 3.10 | Expt1 |
| LMDDLDLR                    | 42  | 6755392                               | N-Term(iTRAQ4plex)                                                  | 1021.50945 | 58 | 57  |  | 3.09 | Expt1 |
| GVNLPGAAVDLPVAVSEK          | 12  | 31981562                              | N-Term(iTRAQ4plex), K17(iTRAQ4plex)                                 | 1925.09941 | 58 | 86  |  | 5.15 | Expt1 |
| NIVLGGSTMFR                 | 18  | 23956222                              | N-Term(iTRAQ4plex)                                                  | 1425.76470 | 58 | 60  |  | 3.43 | Expt1 |
| YLGQDYETLR                  | 8   | 160333229                             | N-Term(iTRAQ4plex)                                                  | 1401.71538 | 58 | 48  |  | 3.81 | Expt1 |
| DYQELMNTK                   | 6   | 124487419                             | N-Term(iTRAQ4plex), K9(iTRAQ4plex)                                  | 1429.72466 | 57 | 61  |  | 3.91 | Expt1 |
| GVAGAPPTVTLR                | 22  | 124494256                             | N-Term(iTRAQ4plex)                                                  | 1395.84307 | 57 | 57  |  | 3.88 | Expt1 |
| LIDFLECGK                   | 6   | 83816893                              | N-Term(iTRAQ4plex), C7(Methylthio), K9(iTRAQ4plex)                  | 1371.72783 | 57 | 58  |  | 3.59 | Expt1 |
| LVIIITAGAR                  | 30  | 6754524;7305229;257743039             | N-Term(iTRAQ4plex)                                                  | 1057.68437 | 57 | 39  |  | 3.09 | Expt1 |
| LPACVVDCGTGYTK              | 8   | 23956222                              | N-Term(iTRAQ4plex), C4(Methylthio), C8(Methylthio), K14(iTRAQ4plex) | 1806.85161 | 57 | 70  |  | 3.98 | Expt1 |
| GFIMAEVMK                   | 3   | 21313144;255982546                    | N-Term(iTRAQ4plex), K9(iTRAQ4plex)                                  | 1313.72893 | 57 | 37  |  | 3.80 | Expt1 |
| GTIEILSDVQLIK               | 8   | 94369748;6671569                      | N-Term(iTRAQ4plex), K13(iTRAQ4plex)                                 | 1717.04265 | 57 | 73  |  | 5.01 | Expt1 |
| DLELLIQATR                  | 3   | 6679158;254750698                     | N-Term(iTRAQ4plex)                                                  | 1416.82231 | 57 | 48  |  | 3.46 | Expt1 |
| LFVSEGSPLVLA AAAAR          | 6   | 51491852;284172357                    | N-Term(iTRAQ4plex)                                                  | 1986.11492 | 57 | 110 |  | 4.98 | Expt1 |
| NVSSFPDDATSPQENR            | 5   | 149250822;149250824;149269443         | N-Term(iTRAQ4plex)                                                  | 2020.97356 | 57 | 107 |  | 4.53 | Expt1 |
| AIGVLTSGGDAQGMNA AVR        | 14  | 9790051;31560653                      | N-Term(iTRAQ4plex)                                                  | 1932.00737 | 57 | 98  |  | 5.09 | Expt1 |
| VPDVNIEGPEGK                | 3   | 61743961                              | N-Term(iTRAQ4plex), K12(iTRAQ4plex)                                 | 1541.84587 | 57 | 85  |  | 4.00 | Expt1 |
| LPSGSGPASPTTGS AVDIR        | 23  | 61743961                              | N-Term(iTRAQ4plex)                                                  | 1914.00469 | 57 | 80  |  | 4.88 | Expt1 |
| SFITTDVNPYYDSFVR            | 7   | 120537241                             | N-Term(iTRAQ4plex)                                                  | 2068.01689 | 57 | 74  |  | 4.13 | Expt1 |
| DECLQFTANALALAMER           | 3   | 238231384                             | N-Term(iTRAQ4plex), C3(Methylthio)                                  | 2085.99479 | 57 | 68  |  | 4.39 | Expt1 |
| GSDVIIMLVGNK                | 3   | 30424655;149253245;13195674;254750706 | N-Term(iTRAQ4plex), K12(iTRAQ4plex)                                 | 1533.89861 | 57 | 62  |  | 4.15 | Expt1 |
| DPEGQPGGELMLGGTDSK          | 10  | 6753556                               | N-Term(iTRAQ4plex), K18(iTRAQ4plex)                                 | 2076.02226 | 57 | 59  |  | 4.58 | Expt1 |
| QLYAWDDGYQIVYK              | 5   | 86439989                              | N-Term(iTRAQ4plex), K14(iTRAQ4plex)                                 | 2050.06272 | 57 | 52  |  | 3.65 | Expt1 |
| CMPTFFQFYK                  | 7   | 6755911                               | N-Term(iTRAQ4plex), C1(Methylthio), M2(Oxidation), K9(iTRAQ4plex)   | 1514.70867 | 57 | 50  |  | 2.96 | Expt1 |
| YLAEVAAGDDK                 | 3   | 149269348;6756041                     | N-Term(iTRAQ4plex), K11(iTRAQ4plex)                                 | 1439.75981 | 57 | 66  |  | 4.08 | Expt1 |
| DSDSILETLQR                 | 3   | 110625954                             | N-Term(iTRAQ4plex)                                                  | 1420.74089 | 57 | 62  |  | 3.83 | Expt1 |

|                       |    |                                                                                     |                                                                     |            |    |    |      |       |
|-----------------------|----|-------------------------------------------------------------------------------------|---------------------------------------------------------------------|------------|----|----|------|-------|
| IGIFGQDEVDVTSK        | 3  | 6806903;158635979                                                                   | N-Term(iTRAQ4plex), K13(iTRAQ4plex)                                 | 1696.90093 | 57 | 85 | 4.72 | Expt1 |
| NLQNLILTAIK           | 10 | 51491845                                                                            | N-Term(iTRAQ4plex), K12(iTRAQ4plex)                                 | 1642.04729 | 57 | 80 | 4.02 | Expt1 |
| ALMGSPQLVAAVVR        | 23 | 28395018                                                                            | N-Term(iTRAQ4plex)                                                  | 1555.91448 | 57 | 69 | 4.25 | Expt1 |
| ALYETELADAR           | 16 | 188219589                                                                           | N-Term(iTRAQ4plex)                                                  | 1395.72624 | 57 | 66 | 3.89 | Expt1 |
| IPSAVGYQPTLATDMGMQER  | 4  | 31980648                                                                            | N-Term(iTRAQ4plex), M15(Oxidation), M18(Oxidation)                  | 2442.17942 | 57 | 60 | 7.11 | Expt1 |
| VIPLFLPQCR            | 44 | 31560625                                                                            | N-Term(iTRAQ4plex), C9(Methylthio)                                  | 1375.77446 | 57 | 50 | 3.34 | Expt1 |
| TLLLPGSQTTFDLDDVR     | 10 | 115647999                                                                           | N-Term(iTRAQ4plex)                                                  | 2035.08660 | 57 | 91 | 3.63 | Expt1 |
| ETYPAYLPLYVAR         | 3  | 6678419                                                                             | N-Term(iTRAQ4plex)                                                  | 1699.92192 | 57 | 54 | 3.84 | Expt1 |
| ETDGSETPEPFAAEAK      | 3  | 77404392                                                                            | N-Term(iTRAQ4plex), K16(iTRAQ4plex)                                 | 1966.94931 | 57 | 44 | 4.64 | Expt1 |
| EWFFLISK              | 6  | 56699423;167466243;167466245                                                        | N-Term(iTRAQ4plex), K8(iTRAQ4plex)                                  | 1357.77129 | 57 | 46 | 3.62 | Expt1 |
| TVDFNSPIFK            | 3  | 167736365                                                                           | N-Term(iTRAQ4plex), K10(iTRAQ4plex)                                 | 1455.81767 | 57 | 64 | 3.99 | Expt1 |
| VPVGDQPPIEYQIK        | 3  | 87299637                                                                            | N-Term(iTRAQ4plex), K15(iTRAQ4plex)                                 | 1986.08183 | 57 | 69 | 3.58 | Expt1 |
| EATPGDIAPYTIPEEDR     | 3  | 74229034                                                                            | N-Term(iTRAQ4plex)                                                  | 2017.98760 | 57 | 78 | 4.99 | Expt1 |
| IDEMPEAAVK            | 3  | 188497724                                                                           | N-Term(iTRAQ4plex), K10(iTRAQ4plex)                                 | 1390.75029 | 57 | 62 | 4.19 | Expt1 |
| CVCPVSNMCR            | 8  | 149261823;164607147                                                                 | N-Term(iTRAQ4plex), C1(Methylthio), C3(Methylthio), C10(Methylthio) | 1494.56560 | 57 | 48 | 3.52 | Expt1 |
| LAMQEFMILPVGASSFR     | 6  | 149249466;149253386                                                                 | N-Term(iTRAQ4plex), M3(Oxidation), M7(Oxidation)                    | 2073.06792 | 57 | 58 | 3.49 | Expt1 |
| ATPFIECNNGR           | 13 | 226437587                                                                           | N-Term(iTRAQ4plex), C7(Methylthio), N8(Deamidated)                  | 1355.62102 | 57 | 58 | 3.65 | Expt1 |
| AQYYLPDGSSTIEIGPSR    | 16 | 8392847                                                                             | N-Term(iTRAQ4plex)                                                  | 2011.02690 | 57 | 89 | 3.53 | Expt1 |
| LANSFAVDLFLK          | 8  | 6678103                                                                             | N-Term(iTRAQ4plex), K12(iTRAQ4plex)                                 | 1583.91172 | 57 | 46 | 4.00 | Expt1 |
| IYFEPDDEEENK          | 11 | 28173550                                                                            | N-Term(iTRAQ4plex), K14(iTRAQ4plex)                                 | 2045.94670 | 57 | 84 | 5.16 | Expt1 |
| NICFTVDDVGGQDK        | 9  | 6680722;149254976;6680720                                                           | N-Term(iTRAQ4plex), C3(Methylthio), K14(iTRAQ4plex)                 | 1915.93303 | 57 | 77 | 3.90 | Expt1 |
| QQQYSPMAIEEQVAVIYAGVR | 8  | 6680748                                                                             | N-Term(iTRAQ4plex), M7(Oxidation)                                   | 2469.26584 | 57 | 75 | 5.68 | Expt1 |
| NIVEAAAVR             | 10 | 149259343;83030252;83030529;94392702;149267077                                      | N-Term(iTRAQ4plex)                                                  | 1086.63945 | 57 | 44 | 3.29 | Expt1 |
| QTVAVGVK              | 3  | 126032329;6681273                                                                   | N-Term(iTRAQ4plex), K9(iTRAQ4plex)                                  | 1202.77605 | 57 | 68 | 4.16 | Expt1 |
| AVNEECPTITR           | 7  | 160707889                                                                           | N-Term(iTRAQ4plex), C6(Methylthio)                                  | 1422.68450 | 57 | 53 | 3.36 | Expt1 |
| GLLADNLIR             | 6  | 161016833                                                                           | N-Term(iTRAQ4plex)                                                  | 1128.68450 | 57 | 46 | 3.43 | Expt1 |
| NQLEEVPSALPR          | 31 | 229608920                                                                           | N-Term(iTRAQ4plex)                                                  | 1496.81975 | 57 | 69 | 4.13 | Expt1 |
| EELVVAVEDVR           | 14 | 6753294                                                                             | N-Term(iTRAQ4plex)                                                  | 1401.77300 | 57 | 53 | 3.60 | Expt1 |
| ESYSVYVYK             | 5  | 68131547;68226433;30061385;149264032;160420312;28316760;160420308;30089704;30061387 | N-Term(iTRAQ4plex), K9(iTRAQ4plex)                                  | 1425.75908 | 57 | 52 | 3.87 | Expt1 |
| LLEGEEER              | 8  | 188219589;9506843;113195686;162287370;161760667                                     | N-Term(iTRAQ4plex)                                                  | 1118.57829 | 57 | 38 | 3.14 | Expt1 |
| LLEGEEQR              | 8  | 149266991;13384908;31980832;74315985;261244894;269914157                            | N-Term(iTRAQ4plex), Q7(Deamidated)                                  | 1118.57829 | 57 | 38 | 3.14 | Expt1 |
| GVGDGTVSWGLEDDEDMTLTR | 5  | 42741690;31543918;226823223                                                         | N-Term(iTRAQ4plex), M17(Oxidation)                                  | 2413.09453 | 57 | 68 | 5.48 | Expt1 |
| LLCEGLQDPQCR          | 7  | 31981748;285402638;285402659                                                        | N-Term(iTRAQ4plex), C3(Methylthio), C11(Methylthio)                 | 1610.72698 | 57 | 47 | 4.09 | Expt1 |
| DALNIETAVK            | 12 | 149260099;6996913                                                                   | N-Term(iTRAQ4plex), K10(iTRAQ4plex)                                 | 1361.79875 | 57 | 79 | 4.50 | Expt1 |
| ESLPSTVSANSLEYEPGER   | 6  | 62079289                                                                            | N-Term(iTRAQ4plex)                                                  | 2209.07793 | 57 | 88 | 4.07 | Expt1 |
| SVNGLAFYDWENTELIR     | 5  | 29789080                                                                            | N-Term(iTRAQ4plex), N3(Deamidated)                                  | 2172.07866 | 57 | 65 | 4.60 | Expt1 |
| DSPSVWAAVPGK          | 14 | 6755040                                                                             | N-Term(iTRAQ4plex), K12(iTRAQ4plex)                                 | 1501.82793 | 57 | 67 | 4.38 | Expt1 |
| EGGLPLNLILLADVTK      | 11 | 148747558                                                                           | N-Term(iTRAQ4plex), K17(iTRAQ4plex)                                 | 1995.17790 | 57 | 83 | 5.13 | Expt1 |
| GLTPSQIGVILR          | 13 | 149257465;149257815;82918395;94390143                                               | N-Term(iTRAQ4plex)                                                  | 1397.86211 | 57 | 56 | 3.53 | Expt1 |
| IIGAVDQIQLTQAQLEER    | 9  | 6679567                                                                             | N-Term(iTRAQ4plex)                                                  | 2169.20761 | 57 | 82 | 5.78 | Expt1 |
| TGVAPIIDVVR           | 22 | 82885877;94369475;63572172;82951993                                                 | N-Term(iTRAQ4plex)                                                  | 1283.78142 | 57 | 62 | 4.27 | Expt1 |
| SFFPEEISSMVLTK        | 20 | 124339829;124339826                                                                 | N-Term(iTRAQ4plex), M10(Oxidation), K14(iTRAQ4plex)                 | 1919.00762 | 57 | 57 | 5.26 | Expt1 |
| AFYPPEISSMVLTK        | 12 | 124339838                                                                           | N-Term(iTRAQ4plex), M10(Oxidation), K14(iTRAQ4plex)                 | 1919.01322 | 57 | 55 | 3.18 | Expt1 |
| TLTGTAALTVQSQEENLR    | 7  | 116734870                                                                           | N-Term(iTRAQ4plex)                                                  | 2076.11295 | 57 | 52 | 4.21 | Expt1 |
| NVPDDVLQLVK           | 3  | 161016833                                                                           | N-Term(iTRAQ4plex), K11(iTRAQ4plex)                                 | 1527.90288 | 57 | 47 | 4.42 | Expt1 |
| FVTSSSGSYGGVR         | 6  | 6680606                                                                             | N-Term(iTRAQ4plex)                                                  | 1447.73088 | 57 | 50 | 3.65 | Expt1 |

|                                |     |                                                                     |                                                                     |            |    |    |      |       |
|--------------------------------|-----|---------------------------------------------------------------------|---------------------------------------------------------------------|------------|----|----|------|-------|
| AVELAANTK                      | 5   | 6678359                                                             | N-Term(iTRAQ4plex), K9(iTRAQ4plex)                                  | 1204.70781 | 57 | 67 | 3.40 | Expt1 |
| GVLYQTVSR                      | 70  | 6753484                                                             | N-Term(iTRAQ4plex)                                                  | 1166.66577 | 57 | 60 | 3.27 | Expt1 |
| VFLENVIR                       | 47  | 149263932;94378251                                                  | N-Term(iTRAQ4plex)                                                  | 1133.68018 | 57 | 60 | 3.35 | Expt1 |
| DLIDFDDR                       | 30  | 82950147;82950149;149264086                                         | N-Term(iTRAQ4plex)                                                  | 1152.56633 | 57 | 49 | 3.48 | Expt1 |
| VLELLPIR                       | 13  | 158517895                                                           | N-Term(iTRAQ4plex)                                                  | 1209.80705 | 57 | 49 | 3.14 | Expt1 |
| MDELQLFR                       | 8   | 225543319;94408011                                                  | N-Term(iTRAQ4plex)                                                  | 1195.62688 | 57 | 37 | 3.03 | Expt1 |
| YFESVLR                        | 18  | 9789943                                                             | N-Term(iTRAQ4plex)                                                  | 1172.60881 | 57 | 54 | 3.32 | Expt1 |
| ALQSVGQIVGEVLK                 | 7   | 27754103                                                            | N-Term(iTRAQ4plex), K14(iTRAQ4plex)                                 | 1729.05686 | 57 | 54 | 4.31 | Expt1 |
| VQYTLDPDGSTLDVGPARG            | 3   | 22122615                                                            | N-Term(iTRAQ4plex)                                                  | 1933.01579 | 56 | 68 | 3.82 | Expt1 |
| NGQDLGVAFK                     | 3   | 160333923                                                           | N-Term(iTRAQ4plex), N1(Deamidated), K10(iTRAQ4plex)                 | 1337.73967 | 56 | 50 | 3.88 | Expt1 |
| YLTVAAVFR                      | 27  | 31981939;7106439;22165384;149253488;149253527                       | N-Term(iTRAQ4plex)                                                  | 1183.69626 | 56 | 61 | 3.39 | Expt1 |
| SQVSPQGLQVR                    | 3   | 110735428;110735426                                                 | N-Term(iTRAQ4plex)                                                  | 1342.75749 | 56 | 50 | 3.63 | Expt1 |
| AVLLSSDLQAEWVWCLR              | 3   | 33469047                                                            | N-Term(iTRAQ4plex), C15(Methylthio)                                 | 2137.05962 | 56 | 83 | 3.49 | Expt1 |
| IALDGGDTK                      | 7   | 6678359                                                             | N-Term(iTRAQ4plex), K9(iTRAQ4plex)                                  | 1233.72961 | 56 | 64 | 3.26 | Expt1 |
| AEVEYFLTPMEEAPK                | 7   | 31982030                                                            | N-Term(iTRAQ4plex), M10(Oxidation), K15(iTRAQ4plex)                 | 2088.00957 | 56 | 58 | 4.01 | Expt1 |
| NLLDELASR                      | 19  | 112421039                                                           | N-Term(iTRAQ4plex)                                                  | 1174.65691 | 56 | 45 | 3.30 | Expt1 |
| DITYFIQQLLR                    | 6   | 52345394;23956222                                                   | N-Term(iTRAQ4plex)                                                  | 1553.88481 | 56 | 65 | 3.90 | Expt1 |
| ELPTAFDYVEFTR                  | 10  | 115496850                                                           | N-Term(iTRAQ4plex)                                                  | 1731.87761 | 56 | 43 | 4.18 | Expt1 |
| CEMEAQNQEYNMLLDIK              | 12  | 226823220                                                           | N-Term(iTRAQ4plex), C1(Methylthio), M12(Oxidation), K17(iTRAQ4plex) | 2422.10154 | 56 | 68 | 4.09 | Expt1 |
| FALGLSGGLSVMLAR                | 6   | 13384778                                                            | N-Term(iTRAQ4plex)                                                  | 1722.97698 | 56 | 82 | 5.59 | Expt1 |
| NLMNAVVTQVK                    | 3   | 6753294;256985119;256985152                                         | N-Term(iTRAQ4plex), K11(iTRAQ4plex)                                 | 1504.87908 | 56 | 68 | 4.52 | Expt1 |
| DYLGDFIEHYAQLGPSQPPDLAQADQDEPR | 4   | 149269973;149269975;149269977                                       | N-Term(iTRAQ4plex)                                                  | 3414.64341 | 56 | 78 | 6.29 | Expt1 |
| MMEVAADVQR                     | 4   | 31981273                                                            | N-Term(iTRAQ4plex)                                                  | 1364.67864 | 56 | 58 | 3.59 | Expt1 |
| DTLFTSDSGTR                    | 3   | 226423922                                                           | N-Term(iTRAQ4plex)                                                  | 1343.65654 | 56 | 52 | 3.48 | Expt1 |
| YGGDEIPFSPYR                   | 10  | 125347376                                                           | N-Term(iTRAQ4plex)                                                  | 1544.75347 | 56 | 59 | 3.36 | Expt1 |
| ELEEDFIR                       | 18  | 19482160                                                            | N-Term(iTRAQ4plex)                                                  | 1194.61321 | 56 | 43 | 3.18 | Expt1 |
| QLDSIIGER                      | 48  | 54607171;113195684                                                  | N-Term(iTRAQ4plex)                                                  | 1174.65625 | 56 | 72 | 3.32 | Expt1 |
| LNIPVNVNPR                     | 11  | 21450277                                                            | N-Term(iTRAQ4plex)                                                  | 1407.81975 | 56 | 46 | 3.21 | Expt1 |
| DIPVDSPELK                     | 3   | 156231027;156231029;41235784;12963497;156231023;156231021           | N-Term(iTRAQ4plex), K10(iTRAQ4plex)                                 | 1400.79643 | 56 | 54 | 3.80 | Expt1 |
| ELVEFAQDDDR                    | 3   | 154240730                                                           | N-Term(iTRAQ4plex)                                                  | 1480.70549 | 56 | 51 | 3.82 | Expt1 |
| ELALPGELTQSR                   | 6   | 19526826;164518904                                                  | N-Term(iTRAQ4plex)                                                  | 1457.80950 | 56 | 38 | 3.13 | Expt1 |
| TLGDQLSLLLGAR                  | 7   | 113930720                                                           | N-Term(iTRAQ4plex)                                                  | 1500.88774 | 56 | 92 | 4.28 | Expt1 |
| WALSQSNPSALR                   | 18  | 225543319;94408011                                                  | N-Term(iTRAQ4plex)                                                  | 1473.79460 | 56 | 62 | 3.66 | Expt1 |
| GVPFTLTTVDTR                   | 6   | 27229085                                                            | N-Term(iTRAQ4plex)                                                  | 1450.80364 | 56 | 75 | 3.95 | Expt1 |
| VDINAPDQVDR                    | 13  | 61743961                                                            | N-Term(iTRAQ4plex)                                                  | 1356.72502 | 56 | 54 | 4.32 | Expt1 |
| NYIMDFQVGK                     | 6   | 149260240                                                           | N-Term(iTRAQ4plex), K10(iTRAQ4plex)                                 | 1502.79570 | 56 | 69 | 4.24 | Expt1 |
| AAVESLGFILFR                   | 9   | 74315975                                                            | N-Term(iTRAQ4plex)                                                  | 1466.85210 | 56 | 61 | 4.50 | Expt1 |
| FGEVVDCTLK                     | 28  | 116256518;116256514;116256516;146260280;148664250;6754222;116256512 | N-Term(iTRAQ4plex), C7(Methylthio), K10(iTRAQ4plex)                 | 1444.74260 | 56 | 77 | 3.61 | Expt1 |
| DNLTWTSMDMQDGEQNK              | 5   | 226874906                                                           | N-Term(iTRAQ4plex), M10(Oxidation), K19(iTRAQ4plex)                 | 2485.14383 | 56 | 69 | 5.17 | Expt1 |
| GCADNMLTVSR                    | 4   | 158635992                                                           | N-Term(iTRAQ4plex), C2(Methylthio)                                  | 1457.66741 | 56 | 66 | 4.36 | Expt1 |
| EEAQAEIQYR                     | 6   | 149249305;15617197                                                  | N-Term(iTRAQ4plex)                                                  | 1509.73027 | 56 | 59 | 4.20 | Expt1 |
| EQVANSFVER                     | 15  | 40556608                                                            | N-Term(iTRAQ4plex)                                                  | 1393.72063 | 56 | 58 | 4.69 | Expt1 |
| YENELALR                       | 93  | 118130981                                                           | N-Term(iTRAQ4plex)                                                  | 1151.61816 | 56 | 59 | 3.41 | Expt1 |
| TTGFELMDGVK                    | 3   | 169234958;32129201;32129205                                         | N-Term(iTRAQ4plex), K11(iTRAQ4plex)                                 | 1485.78691 | 56 | 84 | 4.41 | Expt1 |
| TMQNTNDVETAR                   | 8   | 6671684                                                             | N-Term(iTRAQ4plex)                                                  | 1523.72673 | 56 | 76 | 4.38 | Expt1 |
| GYSFTTAAER                     | 100 | 6671509;6752954                                                     | N-Term(iTRAQ4plex)                                                  | 1276.63201 | 56 | 56 | 4.19 | Expt1 |
| GNVGFVFTK                      | 3   | 94369748;94383772;6671569                                           | N-Term(iTRAQ4plex), K9(iTRAQ4plex)                                  | 1256.72576 | 56 | 46 | 3.69 | Expt1 |
| GDVDVSLPK                      | 3   | 61743961                                                            | N-Term(iTRAQ4plex), K9(iTRAQ4plex)                                  | 1217.70720 | 56 | 46 | 3.36 | Expt1 |



|                         |    |                                                                                                          |                                                      |            |    |     |      |       |
|-------------------------|----|----------------------------------------------------------------------------------------------------------|------------------------------------------------------|------------|----|-----|------|-------|
| LSAEDLVLEGAGLR          | 7  | 153791270                                                                                                | N-Term(iTRAQ4plex)                                   | 1586.89116 | 56 | 84  | 4.16 | Expt1 |
| AQFGQPEILLGTIPGAGTQR    | 18 | 29789289                                                                                                 | N-Term(iTRAQ4plex)                                   | 2255.22734 | 56 | 84  | 4.91 | Expt1 |
| GDGQTCYDIDECSEQPSR      | 3  | 171543883                                                                                                | N-Term(iTRAQ4plex), C6(Methylthio), C12(Methylthio)  | 2238.84892 | 56 | 80  | 4.58 | Expt1 |
| ATEIGGILVNTPEDPNLSK     | 9  | 31982393                                                                                                 | N-Term(iTRAQ4plex), K19(iTRAQ4plex)                  | 2256.23380 | 56 | 73  | 5.20 | Expt1 |
| SLQQLAEER               | 6  | 115496850                                                                                                | N-Term(iTRAQ4plex)                                   | 1217.66155 | 56 | 50  | 3.19 | Expt1 |
| DVVGNDVATILSR           | 6  | 23510313                                                                                                 | N-Term(iTRAQ4plex)                                   | 1502.83306 | 56 | 94  | 4.03 | Expt1 |
| GEYDVTVPR               | 18 | 61743961                                                                                                 | N-Term(iTRAQ4plex)                                   | 1179.61321 | 56 | 57  | 3.90 | Expt1 |
| GPILMELQTYR             | 10 | 6679261                                                                                                  | N-Term(iTRAQ4plex)                                   | 1464.80229 | 56 | 54  | 3.82 | Expt1 |
| VAPLGAELQESAR           | 13 | 160333304                                                                                                | N-Term(iTRAQ4plex)                                   | 1484.81987 | 56 | 82  | 4.43 | Expt1 |
| EDLLAAVK                | 3  | 111074529                                                                                                | N-Term(iTRAQ4plex), K8(iTRAQ4plex)                   | 1146.69463 | 56 | 55  | 3.51 | Expt1 |
| ITWAPVGNPDK             | 18 | 111074529                                                                                                | N-Term(iTRAQ4plex), K11(iTRAQ4plex)                  | 1485.83403 | 56 | 64  | 4.43 | Expt1 |
| WLGPIILGYDTD            | 7  | 124487479                                                                                                | N-Term(iTRAQ4plex), Y8(iTRAQ4plex)                   | 1537.80840 | 56 |     |      | Expt1 |
| DFAVDIHK                | 3  | 27754065                                                                                                 | N-Term(iTRAQ4plex), K8(iTRAQ4plex)                   | 1208.72148 | 56 | 52  | 3.45 | Expt1 |
| AVPLALALISVSNPR         | 11 | 19882201                                                                                                 | N-Term(iTRAQ4plex)                                   | 1665.02176 | 56 | 68  | 4.90 | Expt1 |
| NMMGNIAGANNLR           | 5  | 9790161                                                                                                  | N-Term(iTRAQ4plex)                                   | 1519.76457 | 56 | 58  | 3.16 | Expt1 |
| DFQLFSSPLGK             | 9  | 20330802                                                                                                 | N-Term(iTRAQ4plex), K11(iTRAQ4plex)                  | 1526.85112 | 56 | 62  | 3.80 | Expt1 |
| LSSFIGAIAIGDLVK         | 5  | 126521835                                                                                                | N-Term(iTRAQ4plex), K15(iTRAQ4plex)                  | 1792.08721 | 56 | 86  | 4.24 | Expt1 |
| SALASVIMGLSPILGK        | 7  | 8394027                                                                                                  | N-Term(iTRAQ4plex), M8(Oxidation), K16(iTRAQ4plex)   | 1861.11545 | 56 | 77  | 4.92 | Expt1 |
| MNFSDFLTVMTQK           | 3  | 10257421                                                                                                 | N-Term(iTRAQ4plex), K13(iTRAQ4plex)                  | 1849.94858 | 56 | 45  | 3.72 | Expt1 |
| VGINYQPPTVVPGDLAK       | 29 | 6755901;34740335;6678465;6678467;51765047;82930560;8394493;6678469                                       | N-Term(iTRAQ4plex), K18(iTRAQ4plex)                  | 2113.19023 | 56 | 81  | 5.94 | Expt1 |
| TVAATNMNEESSR           | 4  | 124487163;120300944                                                                                      | N-Term(iTRAQ4plex)                                   | 1553.73540 | 56 | 76  | 4.06 | Expt1 |
| STAAEVQQLVNR            | 3  | 165972311;28849887                                                                                       | N-Term(iTRAQ4plex)                                   | 1459.80229 | 56 | 54  | 3.98 | Expt1 |
| LLIDDDQLR               | 10 | 226423935                                                                                                | N-Term(iTRAQ4plex)                                   | 1228.74040 | 56 | 42  | 3.17 | Expt1 |
| QIFLGGVDR               | 14 | 148747424                                                                                                | N-Term(iTRAQ4plex)                                   | 1148.65495 | 56 | 42  | 3.21 | Expt1 |
| AIVTTASLVPEVESVASECPDLK | 3  | 16905127                                                                                                 | N-Term(iTRAQ4plex), C19(Methylthio), K23(iTRAQ4plex) | 2692.41245 | 56 | 51  | 4.82 | Expt1 |
| FEEAPDYMYLR             | 14 | 22165382                                                                                                 | N-Term(iTRAQ4plex)                                   | 1577.74712 | 56 | 57  | 4.07 | Expt1 |
| GQIIYTWQGANATR          | 13 | 226246550;226246552                                                                                      | N-Term(iTRAQ4plex)                                   | 1722.90618 | 56 | 65  | 4.24 | Expt1 |
| ILYSQCQGDVMR            | 11 | 33620739;94363353                                                                                        | N-Term(iTRAQ4plex), C6(Methylthio)                   | 1474.69902 | 56 | 47  | 3.71 | Expt1 |
| LLEGEER                 | 58 | 29789317;47059013;124487419;149261714;85701680;20911031;124286811;133778953;54607171;113195684;269914154 | N-Term(iTRAQ4plex), C7(Methylthio)                   | 1138.53459 | 56 | 50  | 3.20 | Expt1 |
| LDTSTVLK                | 3  | 111074529                                                                                                | N-Term(iTRAQ4plex), K8(iTRAQ4plex)                   | 1164.70427 | 56 | 44  | 3.28 | Expt1 |
| PGGLLLGDEAPNFEANTTIGR   | 9  | 149241041;6671549                                                                                        | N-Term(iTRAQ4plex)                                   | 2286.18730 | 56 | 111 |      | Expt1 |
| TSIEDQDELSSLQVPLVAGTVNR | 4  | 27501448                                                                                                 | N-Term(iTRAQ4plex)                                   | 2728.45786 | 56 | 49  | 5.97 | Expt1 |
| EVDEQMLNVQNK            | 9  | 33859488;7106439;22165384;21746161;149253488;149253527                                                   | N-Term(iTRAQ4plex), K12(iTRAQ4plex)                  | 1734.89568 | 56 | 94  | 5.76 | Expt1 |
| YEELQVTAGR              | 42 | 29789317;51092301;54607171;113195684                                                                     | N-Term(iTRAQ4plex)                                   | 1309.69011 | 56 | 68  | 4.00 | Expt1 |
| VLEALLPLK               | 3  | 93102409                                                                                                 | N-Term(iTRAQ4plex), K9(iTRAQ4plex)                   | 1283.86003 | 56 | 65  | 3.91 | Expt1 |
| DNLAEDIMR               | 6  | 31982755                                                                                                 | N-Term(iTRAQ4plex)                                   | 1220.60649 | 56 | 54  | 3.15 | Expt1 |
| CEWELLER                | 2  | 225543183                                                                                                | N-Term(iTRAQ4plex), C1(Methylthio)                   | 1267.59319 | 56 |     | 3.03 | Expt1 |
| NFVINNVNR               | 83 | 22203747                                                                                                 | N-Term(iTRAQ4plex)                                   | 1218.70386 | 56 | 61  | 3.60 | Expt1 |
| SNVNDGVAQSTR            | 8  | 226958349                                                                                                | N-Term(iTRAQ4plex)                                   | 1391.70305 | 56 | 67  | 4.18 | Expt1 |
| AAPSAEFSVDR             | 6  | 21704174                                                                                                 | N-Term(iTRAQ4plex)                                   | 1293.65654 | 56 | 58  | 3.76 | Expt1 |
| TNLIVNYLPQNMNTQEELR     | 10 | 31542602                                                                                                 | N-Term(iTRAQ4plex)                                   | 2320.21123 | 56 | 77  | 4.55 | Expt1 |
| TLAESALQLLYTAK          | 8  | 227116327                                                                                                | N-Term(iTRAQ4plex), K14(iTRAQ4plex)                  | 1810.05704 | 56 | 54  | 3.93 | Expt1 |
| LLDPEDVNVDPDEK          | 4  | 55926127                                                                                                 | N-Term(iTRAQ4plex), K15(iTRAQ4plex)                  | 2014.02202 | 56 | 68  | 4.04 | Expt1 |
| TLFATEDSLEVR            | 3  | 124494242;124494244                                                                                      | N-Term(iTRAQ4plex)                                   | 1524.80535 | 56 | 65  | 3.74 | Expt1 |
| DAGMQLQGYR              | 7  | 6754036                                                                                                  | N-Term(iTRAQ4plex)                                   | 1282.63616 | 56 | 50  | 3.79 | Expt1 |
| GFGFILFK                | 7  | 146260280;6754222                                                                                        | N-Term(iTRAQ4plex), K8(iTRAQ4plex)                   | 1216.74016 | 56 | 55  | 3.21 | Expt1 |
| ELTNQQEASVER            | 5  | 118601017                                                                                                | N-Term(iTRAQ4plex)                                   | 1547.78179 | 56 | 59  | 4.56 | Expt1 |
| TNVNVFSELPAPR           | 3  | 225543465                                                                                                | N-Term(iTRAQ4plex)                                   | 1587.85893 | 56 | 38  | 4.20 | Expt1 |

|                                       |    |                                                                                      |                                                                     |            |    |     |      |       |       |
|---------------------------------------|----|--------------------------------------------------------------------------------------|---------------------------------------------------------------------|------------|----|-----|------|-------|-------|
| DVEDEILWVTER                          | 8  | 55926127                                                                             | N-Term(iTRAQ4plex)                                                  | 1647.83721 | 56 | 58  | 4.28 | Expt1 |       |
| EFPFALVVQTLPGTCEDLK                   | 10 | 148277039                                                                            | N-Term(iTRAQ4plex), C15(Methylthio), K19(iTRAQ4plex)                | 2441.27007 | 55 | 75  | 4.42 | Expt1 |       |
| NIVFSPLSISAAALVSLGAK                  | 3  | 160333710;148747546                                                                  | N-Term(iTRAQ4plex), K21(iTRAQ4plex)                                 | 2359.43332 | 55 | 68  | 4.06 | Expt1 |       |
| EYLISLDPENLTLLEK                      | 3  | 17157983                                                                             | N-Term(iTRAQ4plex), K16(iTRAQ4plex)                                 | 2178.22226 | 55 | 63  | 4.23 | Expt1 |       |
| EYLNLYLQDSPAECDYGL                    | 8  | 6754090                                                                              | N-Term(iTRAQ4plex), Y6(iTRAQ4plex), C14(Methylthio)                 | 2440.13431 | 55 | 55  | 4.10 | Expt1 |       |
| EEEEIER                               | 10 | 112421039                                                                            | N-Term(iTRAQ4plex)                                                  | 1190.60271 | 55 | 36  | 3.45 | Expt1 |       |
| GDYPLEAVR                             | 14 | 31981562                                                                             | N-Term(iTRAQ4plex)                                                  | 1163.61894 | 55 | 48  | 3.11 | Expt1 |       |
| LDQLIYIPLPDEK                         | 11 | 225543319;94408011                                                                   | N-Term(iTRAQ4plex), K13(iTRAQ4plex)                                 | 1845.06450 | 55 | 58  | 3.73 | Expt1 |       |
| ELVNLGTGIPVR                          | 7  | 11230780                                                                             | N-Term(iTRAQ4plex)                                                  | 1455.86882 | 55 | 65  | 3.83 | Expt1 |       |
| LGGSLADSYLDEGFLLDK                    | 4  | 126521835                                                                            | N-Term(iTRAQ4plex), K18(iTRAQ4plex)                                 | 2201.16886 | 55 | 66  | 4.82 | Expt1 |       |
| DGNLMFDQVPMVEIDGMK                    | 10 | 149259801;149260087;169808401;50263046;154350202                                     | N-Term(iTRAQ4plex), K18(iTRAQ4plex)                                 | 2327.13872 | 55 | 62  | 5.59 | Expt1 |       |
| YEILTPNSIPK                           | 9  | 114326446                                                                            | N-Term(iTRAQ4plex), N7(Deamidated), K11(iTRAQ4plex)                 | 1563.89580 | 55 | 70  | 1.83 | 3.91  | Expt1 |
| ESTGAQVQVAGDMLPNSTER                  | 15 | 157042772;6754994;157041229;157057549;171906586                                      | N-Term(iTRAQ4plex), M13(Oxidation)                                  | 2250.07646 | 55 | 88  | 5.54 | Expt1 |       |
| LEAALADVPELAR                         | 3  | 17975508                                                                             | N-Term(iTRAQ4plex)                                                  | 1511.85906 | 55 | 67  | 4.14 | Expt1 |       |
| AAAPAPEEEMDECEQALAAEPK                | 5  | 82795783;51704904;110625979                                                          | N-Term(iTRAQ4plex), C13(Methylthio), K22(iTRAQ4plex)                | 2634.20505 | 55 | 67  | 3.97 | Expt1 |       |
| NPYYGGESSITPLEELYK                    | 3  | 33859560                                                                             | N-Term(iTRAQ4plex), K19(iTRAQ4plex)                                 | 2435.22818 | 55 | 43  | 4.72 | Expt1 |       |
| SPVDIVTGGISVPR                        | 3  | 117956399;117956395;117956397                                                        | N-Term(iTRAQ4plex)                                                  | 1540.88017 | 55 | 52  | 3.68 | Expt1 |       |
| GTQGVVTFNFEIFR                        | 12 | 29789343                                                                             | N-Term(iTRAQ4plex)                                                  | 1611.86272 | 55 | 68  | 4.52 | Expt1 |       |
| IAFAITAIK                             | 6  | 6755368;149252587;38085727;149259085;149263957;94395028;94395371;149264584;149264635 | N-Term(iTRAQ4plex), K9(iTRAQ4plex)                                  | 1235.80815 | 55 | 67  | 3.94 | Expt1 |       |
| YGVNPGPIVGTTR                         | 17 | 121949767;121949779;121949760;121949763;121949765;121949769                          | N-Term(iTRAQ4plex)                                                  | 1474.81499 | 55 | 52  | 3.57 | Expt1 |       |
| QWIQISDAVYR                           | 5  | 22122641                                                                             | N-Term(iTRAQ4plex)                                                  | 1522.81633 | 55 | 47  | 3.44 | Expt1 |       |
| AIETYQEAADLPDAPTDLVK                  | 8  | 125628659                                                                            | N-Term(iTRAQ4plex), K20(iTRAQ4plex)                                 | 2448.27959 | 55 | 103 | 5.16 | Expt1 |       |
| FVIGGPQGDAGLTGR                       | 8  | 21704144                                                                             | N-Term(iTRAQ4plex)                                                  | 1588.86125 | 55 | 71  | 4.23 | Expt1 |       |
| ILEATTDNRR                            | 14 | 6754480                                                                              | N-Term(iTRAQ4plex)                                                  | 1290.68035 | 55 | 47  | 3.46 | Expt1 |       |
| TPYTDVNIIVIR                          | 7  | 18250284                                                                             | N-Term(iTRAQ4plex)                                                  | 1535.85686 | 55 | 56  | 4.08 | Expt1 |       |
| VVQCSDLGLK                            | 15 | 20137008                                                                             | N-Term(iTRAQ4plex), C4(Methylthio), K10(iTRAQ4plex)                 | 1395.76091 | 55 | 77  | 4.31 | Expt1 |       |
| SLGQNPTEAELQGMVNEIDKDGNGTVDFPEFLTMMSR | 4  | 13386230                                                                             | N-Term(iTRAQ4plex), M14(Oxidation), K20(iTRAQ4plex), M34(Oxidation) | 4391.07924 | 55 | 62  | 6.88 | Expt1 |       |
| CIESLIAVFQK                           | 12 | 94404308;21886811                                                                    | N-Term(iTRAQ4plex), C1(Methylthio), K11(iTRAQ4plex)                 | 1584.87156 | 55 | 44  | 4.12 | Expt1 |       |
| GENLVSMTEGPPPK                        | 6  | 7305509;6678053                                                                      | N-Term(iTRAQ4plex), K15(iTRAQ4plex)                                 | 1842.99358 | 55 | 89  | 5.62 | Expt1 |       |
| VAGMDVELTVEER                         | 13 | 226874906                                                                            | N-Term(iTRAQ4plex), M4(Oxidation)                                   | 1607.80730 | 55 | 70  | 3.67 | Expt1 |       |
| FGVEQDVMVFASFIR                       | 3  | 31981562                                                                             | N-Term(iTRAQ4plex)                                                  | 2004.00432 | 55 | 58  | 5.16 | Expt1 |       |
| IGDNLIDLNLK                           | 3  | 28077007                                                                             | N-Term(iTRAQ4plex), K12(iTRAQ4plex)                                 | 1628.99302 | 55 | 53  | 3.51 | Expt1 |       |
| YGYEIPVDMMLCK                         | 7  | 6755198                                                                              | N-Term(iTRAQ4plex), C11(Methylthio), K12(iTRAQ4plex)                | 1764.86553 | 55 | 86  | 3.82 | Expt1 |       |
| TMLESAGGLIQTAR                        | 5  | 227116327                                                                            | N-Term(iTRAQ4plex)                                                  | 1591.86138 | 55 | 72  | 4.06 | Expt1 |       |
| NDFQLIGIQDGYLSLLQDSGEVR               | 2  | 31712036;262359885                                                                   | N-Term(iTRAQ4plex)                                                  | 2724.40702 | 55 | 55  | 4.36 | Expt1 |       |
| GDACDDMDGGDIK                         | 8  | 6755781                                                                              | N-Term(iTRAQ4plex), C4(Methylthio), K14(iTRAQ4plex)                 | 1760.70305 | 55 | 103 | 4.98 | Expt1 |       |
| MTISNMEADMNR                          | 3  | 157823695;157823731;157823795;157823761                                              | N-Term(iTRAQ4plex)                                                  | 1556.70122 | 55 | 56  | 4.19 | Expt1 |       |
| GNSIIMLEALER                          | 4  | 94401818                                                                             | N-Term(iTRAQ4plex), M6(Oxidation)                                   | 1505.81536 | 55 | 58  |      | Expt1 |       |
| SLAELGDCNEDLEQAEK                     | 3  | 21704174                                                                             | N-Term(iTRAQ4plex), C8(Methylthio), K17(iTRAQ4plex)                 | 2198.02475 | 55 | 57  | 4.60 | Expt1 |       |
| DVNQQEFVR                             | 20 | 94397093;82996042;12963511                                                           | N-Term(iTRAQ4plex)                                                  | 1278.65679 | 55 | 48  | 4.17 | Expt1 |       |
| LEAEAVPEVSEK                          | 3  | 31981269                                                                             | N-Term(iTRAQ4plex), K12(iTRAQ4plex)                                 | 1588.87131 | 55 | 41  | 3.27 | Expt1 |       |
| GIPLPTGDTSPPELLPGDPLPPPK              | 3  | 31980808                                                                             | N-Term(iTRAQ4plex), K25(iTRAQ4plex)                                 | 2822.55008 | 55 |     | 4.82 | Expt1 |       |
| APNSPDVLEIEFK                         | 18 | 6996911                                                                              | N-Term(iTRAQ4plex), K13(iTRAQ4plex)                                 | 1746.95378 | 55 | 122 | 4.09 | Expt1 |       |
| IEVLEEELR                             | 19 | 82950147;82950149;149264086                                                          | N-Term(iTRAQ4plex)                                                  | 1273.71465 | 55 | 54  | 3.38 | Expt1 |       |
| IQVLEEQLR                             | 20 | 94379744                                                                             | N-Term(iTRAQ4plex), Q2(Deamidated), Q7(Deamidated)                  | 1273.71465 | 55 | 54  | 3.38 | Expt1 |       |
| EQMEEEVVAR                            | 12 | 29336026                                                                             | N-Term(iTRAQ4plex)                                                  | 1363.66484 | 55 | 64  | 4.02 | Expt1 |       |

|                         |    |                                                                                                                                                        |                                                     |            |    |     |      |      |       |
|-------------------------|----|--------------------------------------------------------------------------------------------------------------------------------------------------------|-----------------------------------------------------|------------|----|-----|------|------|-------|
| TIELTAH                 | 50 | 149267092;6857757                                                                                                                                      | N-Term(iTRAQ4plex)                                  | 928.52464  | 55 | 46  |      | 3.15 | Expt1 |
| FAISELFAK               | 8  | 84875537                                                                                                                                               | N-Term(iTRAQ4plex), K9(iTRAQ4plex)                  | 1313.77837 | 55 | 79  |      | 3.87 | Expt1 |
| IIGLDQVAGMSETALPGAFK    | 5  | 114326446                                                                                                                                              | N-Term(iTRAQ4plex), M10(Oxidation), K20(iTRAQ4plex) | 2322.26914 | 55 | 80  |      | 5.14 | Expt1 |
| ETMQNLNDR               | 83 | 149262636;154090941;118130981                                                                                                                          | N-Term(iTRAQ4plex)                                  | 1264.60657 | 55 | 56  | 1.29 | 4.49 | Expt1 |
| SFVLNLGK                | 3  | 6678682                                                                                                                                                | N-Term(iTRAQ4plex), K8(iTRAQ4plex)                  | 1165.70964 | 55 | 54  |      | 3.49 | Expt1 |
| MINLSVPTIDER            | 7  | 21704120;262050551;31543113                                                                                                                            | N-Term(iTRAQ4plex), M1(Oxidation)                   | 1662.85234 | 55 | 76  |      | 3.49 | Expt1 |
| LEQEIATYR               | 34 | 6680604;6754480;21592285;154090941;7106335;27370460;6680606;226823220;21489935                                                                         | N-Term(iTRAQ4plex)                                  | 1266.68437 | 55 | 48  |      | 3.95 | Expt1 |
| TALINSTGEEVAMR          | 13 | 9506843;162287370;161760667                                                                                                                            | N-Term(iTRAQ4plex)                                  | 1635.85515 | 55 | 72  |      | 4.22 | Expt1 |
| GVEICIATPGR             | 6  | 40068493;93587673;40068491;83816893                                                                                                                    | N-Term(iTRAQ4plex), C5(Methylthio)                  | 1305.67888 | 55 | 57  |      | 3.60 | Expt1 |
| ITMQNLNDR               | 15 | 6754480;6680606                                                                                                                                        | N-Term(iTRAQ4plex)                                  | 1248.65105 | 55 | 44  |      | 3.55 | Expt1 |
| SELISYLTSPDVR           | 17 | 226423931                                                                                                                                              | N-Term(iTRAQ4plex)                                  | 1623.87558 | 55 | 74  |      | 4.00 | Expt1 |
| CSNGLVAGFQSR            | 16 | 9789943                                                                                                                                                | N-Term(iTRAQ4plex), C1(Methylthio)                  | 1542.72722 | 55 | 88  |      | 4.39 | Expt1 |
| TIAMDGTEGLVR            | 12 | 31980648                                                                                                                                               | N-Term(iTRAQ4plex), M4(Oxidation)                   | 1422.73833 | 55 | 55  |      | 3.47 | Expt1 |
| QEPSDSPMFIINR           | 6  | 169234958;32129201                                                                                                                                     | N-Term(iTRAQ4plex)                                  | 1677.84001 | 55 | 57  |      | 3.93 | Expt1 |
| ILEFFGLK                | 17 | 42415475                                                                                                                                               | N-Term(iTRAQ4plex), K8(iTRAQ4plex)                  | 1254.78227 | 55 | 67  |      | 3.39 | Expt1 |
| GPTISAQEAQAQLQAR        | 18 | 124487346                                                                                                                                              | N-Term(iTRAQ4plex)                                  | 2125.15262 | 55 | 80  |      | 6.26 | Expt1 |
| DGVANVSIEDR             | 14 | 45597447                                                                                                                                               | N-Term(iTRAQ4plex)                                  | 1318.67241 | 55 | 73  |      | 4.45 | Expt1 |
| FEVIDKQPS               | 2  | 94397536                                                                                                                                               | N-Term(iTRAQ4plex), K6(iTRAQ4plex)                  | 1350.75688 | 55 |     |      | 3.43 | Expt1 |
| VMGNQVFPEVTR            | 16 | 9790161                                                                                                                                                | N-Term(iTRAQ4plex)                                  | 1520.80205 | 55 | 59  |      | 4.34 | Expt1 |
| ELISQFLNR               | 15 | 6678085                                                                                                                                                | N-Term(iTRAQ4plex)                                  | 1376.80681 | 55 | 53  |      | 3.52 | Expt1 |
| IVILPDYLEIAR            | 12 | 7305619                                                                                                                                                | N-Term(iTRAQ4plex)                                  | 1558.94097 | 55 | 45  |      | 3.58 | Expt1 |
| YLLEQDFPGMR             | 5  | 215983062;31981592                                                                                                                                     | N-Term(iTRAQ4plex)                                  | 1512.76641 | 55 | 36  |      | 4.02 | Expt1 |
| GVVGPQGAR               | 38 | 111120329                                                                                                                                              | N-Term(iTRAQ4plex)                                  | 984.57184  | 55 | 58  |      | 3.26 | Expt1 |
| AVSISTEPPTYLR           | 6  | 6755578;240255565                                                                                                                                      | N-Term(iTRAQ4plex)                                  | 1577.86846 | 55 | 63  |      | 3.67 | Expt1 |
| SAELGCTVDEVESLIK        | 3  | 55926127                                                                                                                                               | N-Term(iTRAQ4plex), C6(Methylthio), K16(iTRAQ4plex) | 2027.03427 | 55 | 67  |      | 4.64 | Expt1 |
| YYDEIINALEEDPAAQK       | 3  | 226958474                                                                                                                                              | N-Term(iTRAQ4plex), K17(iTRAQ4plex)                 | 2270.14414 | 55 | 49  |      | 3.87 | Expt1 |
| YVANLFPYK               | 7  | 27754065                                                                                                                                               | N-Term(iTRAQ4plex), K9(iTRAQ4plex)                  | 1402.80571 | 55 | 61  |      | 3.93 | Expt1 |
| VSGPDLDMNLK             | 3  | 61743961                                                                                                                                               | N-Term(iTRAQ4plex), K11(iTRAQ4plex)                 | 1476.80022 | 55 | 58  |      | 3.84 | Expt1 |
| EDTEEYNLR               | 16 | 82801284;94371439;149252089;82918363;82918359;149266543;149266545;82956957;51769129;149266569;82957137;94400765;149268214;149268216;37674277;157277969 | N-Term(iTRAQ4plex)                                  | 1312.61345 | 55 | 47  |      | 3.67 | Expt1 |
| IAVQPGTLGPQGR           | 10 | 226437587                                                                                                                                              | N-Term(iTRAQ4plex)                                  | 1437.83208 | 55 | 61  |      | 3.37 | Expt1 |
| AESPMEVNLPK             | 3  | 61743961                                                                                                                                               | N-Term(iTRAQ4plex), K12(iTRAQ4plex)                 | 1631.86150 | 55 | 49  |      | 4.61 | Expt1 |
| GPAGPQGPR               | 21 | 34328108                                                                                                                                               | N-Term(iTRAQ4plex)                                  | 980.54100  | 55 | 46  |      | 3.05 | Expt1 |
| GISQEQMQEFR             | 11 | 11230802                                                                                                                                               | N-Term(iTRAQ4plex), M7(Oxidation)                   | 1512.72539 | 55 | 53  |      | 3.82 | Expt1 |
| LGSLVENNER              | 3  | 149258001;22203755                                                                                                                                     | N-Term(iTRAQ4plex)                                  | 1274.68523 | 55 | 49  |      | 3.21 | Expt1 |
| INISEGNCPER             | 19 | 157042772;6754994;157041229;157057549;171906586                                                                                                        | N-Term(iTRAQ4plex), C8(Methylthio)                  | 1421.66484 | 55 | 45  |      | 3.99 | Expt1 |
| QEDFELLCPDGTR           | 17 | 20330802                                                                                                                                               | N-Term(iTRAQ4plex), C8(Methylthio)                  | 1712.77678 | 54 | 73  |      | 4.03 | Expt1 |
| LFPDDPYK                | 4  | 6754090                                                                                                                                                | N-Term(iTRAQ4plex), K8(iTRAQ4plex)                  | 1282.68535 | 54 | 50  |      | 3.23 | Expt1 |
| YSDMIVAAIAQAEK          | 3  | 31560697                                                                                                                                               | N-Term(iTRAQ4plex), M4(Oxidation), K13(iTRAQ4plex)  | 1742.92929 | 54 | 40  |      | 4.29 | Expt1 |
| ISMFPDVLNLK             | 4  | 61743961                                                                                                                                               | N-Term(iTRAQ4plex), K11(iTRAQ4plex)                 | 1504.87480 | 54 | 50  |      | 4.00 | Expt1 |
| VILPVSUDEYQVQQLYSVAEASK | 6  | 6679337                                                                                                                                                | N-Term(iTRAQ4plex), K23(iTRAQ4plex)                 | 2782.52359 | 54 | 90  |      | 5.86 | Expt1 |
| VGQMVISGVDR             | 5  | 13385312                                                                                                                                               | N-Term(iTRAQ4plex)                                  | 1304.71550 | 54 | 52  |      | 3.38 | Expt1 |
| YEATISDMEDR             | 5  | 29336026                                                                                                                                               | N-Term(iTRAQ4plex)                                  | 1473.66692 | 54 | 43  |      | 4.02 | Expt1 |
| IQPSGGTNINEALLR         | 7  | 226874935                                                                                                                                              | N-Term(iTRAQ4plex)                                  | 1726.95842 | 54 | 102 |      | 3.65 | Expt1 |
| DISDVER                 | 2  | 27754065                                                                                                                                               | N-Term(iTRAQ4plex)                                  | 977.50383  | 54 | 39  |      |      | Expt1 |
| LAAIQESGVER             | 3  | 238231384                                                                                                                                              | N-Term(iTRAQ4plex)                                  | 1316.73149 | 54 | 56  |      | 3.62 | Expt1 |

|                          |    |                                                              |                                                                      |            |    |    |      |       |
|--------------------------|----|--------------------------------------------------------------|----------------------------------------------------------------------|------------|----|----|------|-------|
| EFLVAGGEDFK              | 3  | 160707896                                                    | N-Term(iTRAQ4plex), K11(iTRAQ4plex)                                  | 1499.80486 | 54 | 55 | 3.99 | Expt1 |
| VVFIFGPK                 | 9  | 6671549                                                      | N-Term(iTRAQ4plex), K9(iTRAQ4plex)                                   | 1309.78276 | 54 | 55 | 3.63 | Expt1 |
| DYPGFSVSDAEAIR           | 6  | 149254235;160707925                                          | N-Term(iTRAQ4plex)                                                   | 1767.86917 | 54 | 70 | 4.00 | Expt1 |
| VVTYGMANLLTGPK           | 8  | 33859662                                                     | N-Term(iTRAQ4plex), K14(iTRAQ4plex)                                  | 1751.99796 | 54 | 52 | 4.47 | Expt1 |
| GPDINLPEVSVK             | 3  | 61743961                                                     | N-Term(iTRAQ4plex), K12(iTRAQ4plex)                                  | 1555.89751 | 54 | 64 | 4.55 | Expt1 |
| VLGLLPEEITAMLR           | 3  | 29336026                                                     | N-Term(iTRAQ4plex)                                                   | 1699.00176 | 54 | 59 | 3.27 | Expt1 |
| VCENIPIVLCGNK            | 10 | 149260287;124487358;6677677                                  | N-Term(iTRAQ4plex), C2(Methylthio), C10(Methylthio), K13(iTRAQ4plex) | 1781.90154 | 54 | 88 | 4.26 | Expt1 |
| DISTNYYASQK              | 3  | 6755863                                                      | N-Term(iTRAQ4plex), K11(iTRAQ4plex)                                  | 1577.80864 | 54 | 62 | 4.19 | Expt1 |
| IPLLTDPK                 | 4  | 6753762                                                      | N-Term(iTRAQ4plex), K9(iTRAQ4plex)                                   | 1297.83757 | 54 | 50 | 3.46 | Expt1 |
| NVETMNYADIER             | 2  | 21313536                                                     | N-Term(iTRAQ4plex)                                                   | 1598.76152 | 54 |    | 3.80 | Expt1 |
| IQNFESFAEMNR             | 6  | 6753498                                                      | N-Term(iTRAQ4plex)                                                   | 1629.78801 | 54 | 58 | 4.29 | Expt1 |
| GAYPVFFNFR               | 4  | 124001560                                                    | N-Term(iTRAQ4plex)                                                   | 1462.76225 | 54 | 60 | 3.37 | Expt1 |
| AVTDEEPLIFANR            | 5  | 124494256                                                    | N-Term(iTRAQ4plex)                                                   | 1765.92998 | 54 | 85 | 4.47 | Expt1 |
| EIEIDIEPTDK              | 4  | 6679034                                                      | N-Term(iTRAQ4plex), K11(iTRAQ4plex)                                  | 1589.84990 | 54 | 58 | 4.11 | Expt1 |
| SQFTITPGSEQIR            | 9  | 18079339                                                     | N-Term(iTRAQ4plex)                                                   | 1607.85112 | 54 | 52 | 4.24 | Expt1 |
| MSSILAGGSCR              | 3  | 6680604;21489935                                             | N-Term(iTRAQ4plex), C10(Methylthio)                                  | 1271.60442 | 54 | 42 | 3.79 | Expt1 |
| LGDIVISIQPCPDVK          | 18 | 225543319;94408011                                           | N-Term(iTRAQ4plex), C10(Methylthio), K14(iTRAQ4plex)                 | 1817.98210 | 54 | 65 | 3.74 | Expt1 |
| AYGLALAK                 | 6  | 6678359                                                      | N-Term(iTRAQ4plex), K8(iTRAQ4plex)                                   | 1094.67668 | 54 | 57 | 3.33 | Expt1 |
| LSNIFVIGK                | 6  | 6677805                                                      | N-Term(iTRAQ4plex), K9(iTRAQ4plex)                                   | 1278.81011 | 54 | 63 | 3.92 | Expt1 |
| CGEDEDTPVAEYR            | 6  | 33563246                                                     | N-Term(iTRAQ4plex), C1(Methylthio)                                   | 1673.69316 | 54 | 54 | 3.89 | Expt1 |
| DFYELEPEK                | 3  | 24418919                                                     | N-Term(iTRAQ4plex), K9(iTRAQ4plex)                                   | 1457.73882 | 54 | 48 | 4.05 | Expt1 |
| EGVYTVFAPTNEAFQAMPPEELNK | 3  | 6678321                                                      | N-Term(iTRAQ4plex), M17(Oxidation), K24(iTRAQ4plex)                  | 2986.48075 | 54 | 66 | 5.22 | Expt1 |
| YLMDEGDYK                | 5  | 149250073;149257749                                          | N-Term(iTRAQ4plex), K11(iTRAQ4plex)                                  | 1693.79375 | 54 | 82 | 4.25 | Expt1 |
| AWALDIAELR               | 7  | 33413404                                                     | N-Term(iTRAQ4plex)                                                   | 1301.73638 | 54 | 50 | 3.67 | Expt1 |
| FVDGLMIHSGDPVNYVDTAVR    | 8  | 6755372                                                      | N-Term(iTRAQ4plex), M6(Oxidation)                                    | 2628.29386 | 54 | 47 | 5.38 | Expt1 |
| AMDQEIYNPQFVQK           | 3  | 6753488                                                      | N-Term(iTRAQ4plex), K15(iTRAQ4plex)                                  | 2036.07060 | 54 | 76 | 4.48 | Expt1 |
| EYGGDLVLVNNAGIAFK        | 4  | 113680352                                                    | N-Term(iTRAQ4plex), K17(iTRAQ4plex)                                  | 2068.13872 | 54 | 58 | 3.41 | Expt1 |
| DIDDDLEGEVTEECGK         | 3  | 76677895;257196186;257196183                                 | N-Term(iTRAQ4plex), C14(Methylthio), K16(iTRAQ4plex)                 | 2100.92118 | 54 | 47 | 3.35 | Expt1 |
| WEQGQADYMGADSFQDNK       | 3  | 7305121                                                      | N-Term(iTRAQ4plex), M9(Oxidation), K18(iTRAQ4plex)                   | 2379.08768 | 54 | 71 | 5.38 | Expt1 |
| YLGAEYMQSVGNMR           | 16 | 20330802                                                     | N-Term(iTRAQ4plex)                                                   | 1762.84184 | 54 | 83 | 4.49 | Expt1 |
| TAPYVVTVGSVDQTVK         | 5  | 149262197;7305363                                            | N-Term(iTRAQ4plex), K15(iTRAQ4plex)                                  | 1853.03263 | 54 | 61 | 4.60 | Expt1 |
| QLLVEEWGPLSGK            | 12 | 124487435                                                    | N-Term(iTRAQ4plex), K13(iTRAQ4plex)                                  | 1743.99407 | 54 | 88 | 4.31 | Expt1 |
| FADDTYTESYISTIGVDFK      | 11 | 6679587;21313162                                             | N-Term(iTRAQ4plex), K19(iTRAQ4plex)                                  | 2460.21402 | 54 | 58 | 5.17 | Expt1 |
| IMGPEDEQMGLLR            | 7  | 114326446                                                    | N-Term(iTRAQ4plex)                                                   | 1745.90911 | 54 | 52 | 3.95 | Expt1 |
| SPAYTLVWTR               | 4  | 149253040;183979966                                          | N-Term(iTRAQ4plex)                                                   | 1337.73406 | 54 | 46 | 3.37 | Expt1 |
| EEPEAVLPGAQPTLISAISK     | 5  | 93102409                                                     | N-Term(iTRAQ4plex), K21(iTRAQ4plex)                                  | 2467.36502 | 54 | 58 | 4.92 | Expt1 |
| EMTEALGPGTIR             | 3  | 239052674                                                    | N-Term(iTRAQ4plex)                                                   | 1418.74285 | 54 | 45 | 3.73 | Expt1 |
| EVFEDAMEIR               | 7  | 84875537                                                     | N-Term(iTRAQ4plex)                                                   | 1382.67583 | 54 | 45 | 3.70 | Expt1 |
| TALLELWELR               | 9  | 115496850                                                    | N-Term(iTRAQ4plex)                                                   | 1387.81011 | 54 | 54 | 4.46 | Expt1 |
| LYVYNTDNDNCR             | 4  | 224967109                                                    | N-Term(iTRAQ4plex), C11(Methylthio)                                  | 1666.73235 | 54 | 53 | 3.57 | Expt1 |
| TLTAEAEAEWER             | 3  | 20270031                                                     | N-Term(iTRAQ4plex)                                                   | 1736.81145 | 54 | 57 | 3.46 | Expt1 |
| LAQDPFPPLPGELLEK         | 7  | 239052674                                                    | N-Term(iTRAQ4plex), K16(iTRAQ4plex)                                  | 2118.17827 | 54 | 47 | 4.50 | Expt1 |
| NVQAEEMVEFSSGLK          | 9  | 6680748                                                      | N-Term(iTRAQ4plex), K15(iTRAQ4plex)                                  | 1956.00858 | 54 | 59 | 5.04 | Expt1 |
| AGFYFDGISR               | 9  | 168693628                                                    | N-Term(iTRAQ4plex)                                                   | 1276.64446 | 54 | 37 | 3.72 | Expt1 |
| VFLADQPIEAPEEPR          | 6  | 110431378                                                    | N-Term(iTRAQ4plex)                                                   | 1854.97600 | 54 | 61 | 4.48 | Expt1 |
| DMTSEELDDLIR             | 9  | 21450277                                                     | N-Term(iTRAQ4plex), M2(Oxidation)                                    | 1596.75493 | 54 | 61 | 3.82 | Expt1 |
| SLMPYFLLTQAVR            | 2  | 19705424                                                     | N-Term(iTRAQ4plex), M3(Oxidation)                                    | 1698.93926 | 54 | 77 |      | Expt1 |
| DLTDYLMK                 | 31 | 6671509;6752954;6671507;157823889;14192922;33563240;30425250 | N-Term(iTRAQ4plex), M7(Oxidation), K8(iTRAQ4plex)                    | 1302.68950 | 54 | 48 | 3.13 | Expt1 |
| YEDMAAFMK                | 5  | 134023662                                                    | N-Term(iTRAQ4plex), M4(Oxidation), K9(iTRAQ4plex)                    | 1409.67497 | 54 | 38 | 3.05 | Expt1 |

|                          |     |                                                                                                                                                                               |                                                                       |            |    |    |      |      |       |
|--------------------------|-----|-------------------------------------------------------------------------------------------------------------------------------------------------------------------------------|-----------------------------------------------------------------------|------------|----|----|------|------|-------|
| AGLQFPVGR                | 156 | 30061399;94394730;30089710;<br>30061353;7949045;94378041;2<br>8316756;29244126;119433657;<br>30061327;30061379;30061371;<br>7106331;256773209                                 | N-Term(iTRAQ4plex)                                                    | 1088.63318 | 54 | 58 |      | 3.88 | Expt1 |
| LQDAEIR                  | 36  | 6755392                                                                                                                                                                       | N-Term(iTRAQ4plex)                                                    | 1059.59155 | 54 | 52 |      | 3.60 | Expt1 |
| GTDIRYGTLDLCWR           | 6   | 22094075                                                                                                                                                                      | N-Term(iTRAQ4plex), C12(Methylthio)                                   | 1821.81169 | 54 | 62 |      | 4.25 | Expt1 |
| DDDLNLR                  | 53  | 22203747                                                                                                                                                                      | N-Term(iTRAQ4plex)                                                    | 1004.51341 | 54 | 49 |      | 3.09 | Expt1 |
| AGGSASAMLQPLLDNQVGFK     | 5   | 7242197                                                                                                                                                                       | N-Term(iTRAQ4plex), K20(iTRAQ4plex)                                   | 2292.23325 | 54 | 43 |      | 4.13 | Expt1 |
| ILLGAGESGK               | 6   | 74271899;124487259;3356325<br>6;89001109;47271350;6680041<br>;84000001;6754006;41054806;<br>47271396;117959921;1179599<br>28;117959930;6680043;164607<br>137;6754012          | N-Term(iTRAQ4plex), K11(iTRAQ4plex)                                   | 1345.83708 | 54 | 86 |      | 3.86 | Expt1 |
| EGPAVVGQFIQDVK           | 5   | 189409138                                                                                                                                                                     | N-Term(iTRAQ4plex), K14(iTRAQ4plex)                                   | 1774.99797 | 54 | 72 |      | 4.55 | Expt1 |
| NNLSFIETSDLNVEEAFK       | 4   | 6679583                                                                                                                                                                       | N-Term(iTRAQ4plex), K21(iTRAQ4plex)                                   | 2617.33225 | 54 | 95 |      | 5.73 | Expt1 |
| MELIDDSTVVR              | 6   | 165972311                                                                                                                                                                     | N-Term(iTRAQ4plex)                                                    | 1421.74199 | 54 | 45 |      | 3.51 | Expt1 |
| LYGSPSLPGNMQYCVR         | 7   | 33469047                                                                                                                                                                      | N-Term(iTRAQ4plex), C13(Methylthio)                                   | 1887.90788 | 54 | 48 |      | 4.02 | Expt1 |
| NVVTIFSAPNYCYR           | 4   | 8394024;149258657;9506983                                                                                                                                                     | N-Term(iTRAQ4plex), C12(Methylthio)                                   | 1836.89397 | 53 | 65 |      | 3.05 | Expt1 |
| TTQVPQYILDDFIQNDR        | 10  | 150456419                                                                                                                                                                     | N-Term(iTRAQ4plex)                                                    | 2210.12693 | 53 | 54 |      | 3.91 | Expt1 |
| VAIDLGYR                 | 9   | 160707894                                                                                                                                                                     | N-Term(iTRAQ4plex)                                                    | 1050.60686 | 53 |    |      | 3.34 | Expt1 |
| AAGGAGAQVGGSSIGSSASSVTVR | 5   | 162287370                                                                                                                                                                     | N-Term(iTRAQ4plex)                                                    | 2366.20694 | 53 | 91 |      | 5.22 | Expt1 |
| GNWGFLDQVAALR            | 3   | 37718991;268839831                                                                                                                                                            | N-Term(iTRAQ4plex)                                                    | 1590.85613 | 53 | 62 |      | 3.88 | Expt1 |
| LELVEQER                 | 9   | 112421039                                                                                                                                                                     | N-Term(iTRAQ4plex)                                                    | 1159.64470 | 53 | 38 |      | 3.15 | Expt1 |
| LLPQVMYLDGYDR            | 8   | 40254600                                                                                                                                                                      | N-Term(iTRAQ4plex), M6(Oxidation)                                     | 1742.89275 | 53 | 48 |      | 3.40 | Expt1 |
| LVSYPYDMAR               | 17  | 160707889                                                                                                                                                                     | N-Term(iTRAQ4plex)                                                    | 1358.69011 | 53 | 45 |      | 3.55 | Expt1 |
| TTPSVVAFTADGER           | 8   | 162461907                                                                                                                                                                     | N-Term(iTRAQ4plex)                                                    | 1594.82146 | 53 | 45 |      | 3.73 | Expt1 |
| TAMNVNEIFMAIAK           | 5   | 113866024                                                                                                                                                                     | N-Term(iTRAQ4plex), K14(iTRAQ4plex)                                   | 1840.99930 | 53 | 54 |      | 3.88 | Expt1 |
| QNSLDEDLIR               | 6   | 6678483                                                                                                                                                                       | N-Term(iTRAQ4plex)                                                    | 1346.70256 | 53 | 52 |      | 3.78 | Expt1 |
| LVEEAIQCAEK              | 6   | 29789289                                                                                                                                                                      | N-Term(iTRAQ4plex), C8(Methylthio), K11(iTRAQ4plex)                   | 1566.81963 | 53 | 76 |      | 4.34 | Expt1 |
| LLLIGDSGVGK              | 24  | 6679587;37718983;7710086;27<br>734154;38372905;21313162;21<br>311975;165377074                                                                                                | N-Term(iTRAQ4plex), K11(iTRAQ4plex)                                   | 1359.85356 | 53 | 66 |      | 3.83 | Expt1 |
| YPVNSVNILK               | 5   | 110625624                                                                                                                                                                     | N-Term(iTRAQ4plex), K10(iTRAQ4plex)                                   | 1434.86113 | 53 | 54 |      | 3.51 | Expt1 |
| ILGIGPDDPDLVR            | 3   | 22122469                                                                                                                                                                      | N-Term(iTRAQ4plex)                                                    | 1523.85625 | 53 | 41 |      | 4.03 | Expt1 |
| IIAVDINK                 | 4   | 6724311                                                                                                                                                                       | N-Term(iTRAQ4plex), K8(iTRAQ4plex)                                    | 1173.75334 | 53 | 55 |      | 3.26 | Expt1 |
| TLSTMIASDTSGDYR          | 3   | 160707958                                                                                                                                                                     | N-Term(iTRAQ4plex)                                                    | 1761.84575 | 53 | 47 |      | 4.67 | Expt1 |
| VMTIPYQMPASSPVICAGGQDR   | 5   | 6754994                                                                                                                                                                       | N-Term(iTRAQ4plex), C17(Methylthio)                                   | 2608.26047 | 53 | 50 |      | 4.85 | Expt1 |
| IALVITDGR                | 106 | 6753484                                                                                                                                                                       | N-Term(iTRAQ4plex)                                                    | 1101.67534 | 53 | 59 |      | 3.37 | Expt1 |
| TTGFGMIYDSLDAK           | 6   | 46519156;46519160;14926785<br>5;149271781                                                                                                                                     | N-Term(iTRAQ4plex), M6(Oxidation), K15(iTRAQ4plex)                    | 1985.97942 | 53 | 58 | 1.17 | 4.33 | Expt1 |
| GPSGPQGIR                | 27  | 111120329                                                                                                                                                                     | N-Term(iTRAQ4plex)                                                    | 1012.56841 | 53 | 51 |      | 3.46 | Expt1 |
| ALWEDSGIQNAYDR           | 3   | 89001109                                                                                                                                                                      | N-Term(iTRAQ4plex)                                                    | 1781.85906 | 53 | 46 |      | 3.86 | Expt1 |
| DTLYEAVR                 | 13  | 149233917                                                                                                                                                                     | N-Term(iTRAQ4plex)                                                    | 1110.59319 | 53 | 41 |      | 3.03 | Expt1 |
| GPVGLPSVDLSMPK           | 5   | 61743961                                                                                                                                                                      | N-Term(iTRAQ4plex), M13(Oxidation), K15(iTRAQ4plex)                   | 1815.98288 | 53 | 60 |      | 5.13 | Expt1 |
| ALMLQGVLLADAVAVTMGPK     | 3   | 149270048;183396771                                                                                                                                                           | N-Term(iTRAQ4plex), M18(Oxidation), K21(iTRAQ4plex)                   | 2417.34793 | 53 | 68 |      | 5.53 | Expt1 |
| NLIDAGVDALR              | 7   | 149259047;31981382                                                                                                                                                            | N-Term(iTRAQ4plex)                                                    | 1300.73467 | 53 | 46 |      | 3.34 | Expt1 |
| LAVSQVPR                 | 111 | 6678359                                                                                                                                                                       | N-Term(iTRAQ4plex)                                                    | 1013.62413 | 53 | 46 |      | 3.16 | Expt1 |
| NMQDVTVEDYK              | 6   | 54607171;113195684                                                                                                                                                            | N-Term(iTRAQ4plex), M2(Oxidation), K10(iTRAQ4plex)                    | 1546.73845 | 53 | 40 |      | 3.56 | Expt1 |
| YLAEVACGDDR              | 20  | 149275178;6756039                                                                                                                                                             | N-Term(iTRAQ4plex), C7(Methylthio)                                    | 1401.62920 | 53 | 57 |      | 4.06 | Expt1 |
| TNGKEPELLEPIPYEFMA       | 3   | 149249111;82885114;1492519<br>01;149251962;149255371;1492<br>57782;149259532;149262565;8<br>2949522;38075571;51770297;1<br>49269802;149270175;8301331<br>5;94410221;162417994 | N-Term(iTRAQ4plex), N2(Deamidated), K4(iTRAQ4plex),<br>M17(Oxidation) | 2383.20755 | 53 |    |      | 3.63 | Expt1 |

|                         |    |                                                                 |                                                    |            |    |     |  |      |       |
|-------------------------|----|-----------------------------------------------------------------|----------------------------------------------------|------------|----|-----|--|------|-------|
| MSSYAFFVQTCR            | 8  | 149261847;82952271;149266674;149266934;83014391;6680229         | N-Term(iTRAQ4plex), M1(Oxidation), C11(Methylthio) | 1645.73357 | 53 | 71  |  | 3.75 | Expt1 |
| GFGTDEQAIIDCLGSR        | 19 | 160707921                                                       | N-Term(iTRAQ4plex), C12(Methylthio)                | 1871.87773 | 53 | 81  |  | 5.04 | Expt1 |
| GIFEALRPLETLPVEGLIR     | 3  | 134288917                                                       | N-Term(iTRAQ4plex)                                 | 2267.32962 | 53 | 30  |  | 3.76 | Expt1 |
| VYSYNNLEESCTR           | 3  | 126518317                                                       | N-Term(iTRAQ4plex), C11(Methylthio)                | 1816.80388 | 53 | 51  |  | 4.29 | Expt1 |
| AYLPVNESFGFTADLR        | 11 | 33859482                                                        | N-Term(iTRAQ4plex)                                 | 1944.00188 | 53 | 67  |  | 4.86 | Expt1 |
| VLCVINPQNGPTGGVQTR      | 15 | 33413404                                                        | N-Term(iTRAQ4plex), C3(Methylthio)                 | 1986.04057 | 53 | 84  |  | 4.67 | Expt1 |
| TAVCDIPPR               | 62 | 33859488;31981939;7106439;22165384;21746161;149253488;149253527 | N-Term(iTRAQ4plex), C4(Methylthio)                 | 1161.58745 | 53 | 57  |  | 3.19 | Expt1 |
| GSEGPQGV                | 40 | 34328108                                                        | N-Term(iTRAQ4plex)                                 | 1030.54106 | 53 | 51  |  | 3.65 | Expt1 |
| FALITWIGEDVSLQR         | 6  | 19482160                                                        | N-Term(iTRAQ4plex)                                 | 1949.06389 | 53 | 61  |  | 4.33 | Expt1 |
| EQLAIAEFAR              | 8  | 110625624                                                       | N-Term(iTRAQ4plex)                                 | 1291.71453 | 53 | 50  |  | 3.85 | Expt1 |
| VGEQAQVVIIDMNDPSNPIR    | 5  | 51491845                                                        | N-Term(iTRAQ4plex), M12(Oxidation)                 | 2355.21604 | 53 | 49  |  | 4.50 | Expt1 |
| LFAVAPNR                | 70 | 22203747                                                        | N-Term(iTRAQ4plex)                                 | 1031.61247 | 53 | 47  |  | 3.45 | Expt1 |
| FVEDVSR                 | 21 | 22203747                                                        | N-Term(iTRAQ4plex)                                 | 995.52776  | 53 | 49  |  |      | Expt1 |
| GFYYLMQELPQER           | 7  | 31982520                                                        | N-Term(iTRAQ4plex)                                 | 1817.90557 | 53 | 47  |  | 4.57 | Expt1 |
| SGGIPALVR               | 8  | 28395018                                                        | N-Term(iTRAQ4plex)                                 | 1013.61980 | 53 | 40  |  |      | Expt1 |
| TDDYLDQPCLETINR         | 6  | 33859560                                                        | N-Term(iTRAQ4plex), C9(Methylthio)                 | 1985.90959 | 53 | 98  |  | 4.30 | Expt1 |
| ECLPLIFLR               | 12 | 6677805;51708365                                                | N-Term(iTRAQ4plex), C2(Methylthio)                 | 1406.80632 | 53 | 47  |  | 3.37 | Expt1 |
| ALYEAGER                | 9  | 124517663                                                       | N-Term(iTRAQ4plex)                                 | 1052.55229 | 53 | 41  |  | 3.28 | Expt1 |
| VAEFTTNLMEEEEK          | 6  | 114326446                                                       | N-Term(iTRAQ4plex), K14(iTRAQ4plex)                | 1957.96781 | 53 | 49  |  | 4.97 | Expt1 |
| MLQTSVVLVSGLR           | 13 | 6678483                                                         | N-Term(iTRAQ4plex)                                 | 1534.87749 | 53 | 65  |  | 3.90 | Expt1 |
| TSAALSTMGSAISR          | 3  | 31560247                                                        | N-Term(iTRAQ4plex)                                 | 1496.79106 | 53 | 48  |  | 3.64 | Expt1 |
| LGTDESCFNMLATR          | 15 | 160707958                                                       | N-Term(iTRAQ4plex), C7(Methylthio)                 | 1860.88469 | 53 | 97  |  | 4.85 | Expt1 |
| TLMSPLGITR              | 13 | 6678085;6678083;76881807;6678079                                | N-Term(iTRAQ4plex)                                 | 1232.71758 | 53 | 36  |  | 3.19 | Expt1 |
| ELQGYESTDFVGYFK         | 9  | 226246550;226246552                                             | N-Term(iTRAQ4plex), K15(iTRAQ4plex)                | 2071.03154 | 53 | 76  |  | 5.02 | Expt1 |
| LALLEEAR                | 18 | 149266483;225543191;225543193                                   | N-Term(iTRAQ4plex)                                 | 1058.63225 | 53 | 56  |  | 3.03 | Expt1 |
| LGIYEAMK                | 3  | 82950147;82950149;149264086                                     | N-Term(iTRAQ4plex), K8(iTRAQ4plex)                 | 1212.69975 | 53 | 46  |  | 3.15 | Expt1 |
| NVLDTSWPTPPPALR         | 3  | 124494242;124494244                                             | N-Term(iTRAQ4plex)                                 | 1807.98894 | 53 | 57  |  | 3.35 | Expt1 |
| GFSLEELR                | 22 | 149251177;149252074;149258092;94397192;94407673                 | N-Term(iTRAQ4plex)                                 | 1094.59526 | 53 | 43  |  | 3.44 | Expt1 |
| GVLFGPPGTGK             | 4  | 33859604                                                        | N-Term(iTRAQ4plex), K12(iTRAQ4plex)                | 1430.86455 | 53 | 71  |  | 3.88 | Expt1 |
| AIEEGTLEEIEIEVR         | 6  | 76253779                                                        | N-Term(iTRAQ4plex)                                 | 1889.94963 | 53 | 88  |  | 4.93 | Expt1 |
| GQTSGQIVMPR             | 5  | 31982664                                                        | N-Term(iTRAQ4plex)                                 | 1317.70549 | 53 | 58  |  | 4.60 | Expt1 |
| SVFQVSMQVAR             | 23 | 6671688                                                         | N-Term(iTRAQ4plex)                                 | 1395.75725 | 53 | 71  |  | 3.89 | Expt1 |
| DSDGQVFGALASEPFK        | 3  | 194328704;194328702;194328706;18700026;194328708                | N-Term(iTRAQ4plex), K16(iTRAQ4plex)                | 1956.00364 | 53 | 45  |  | 4.78 | Expt1 |
| EEEAIQLDGLNASQIR        | 3  | 6755863                                                         | N-Term(iTRAQ4plex)                                 | 1929.99955 | 53 | 42  |  | 4.45 | Expt1 |
| FLGSNDEEMSYDNNPYIR      | 8  | 164565411                                                       | N-Term(iTRAQ4plex)                                 | 2308.04111 | 53 | 73  |  | 4.46 | Expt1 |
| VTLTPEEAR               | 22 | 6754524;257743039                                               | N-Term(iTRAQ4plex)                                 | 1288.68682 | 53 | 51  |  | 3.77 | Expt1 |
| MGAVFMDAPVSGGVAAR       | 3  | 21704140                                                        | N-Term(iTRAQ4plex)                                 | 1836.92630 | 53 | 39  |  | 4.00 | Expt1 |
| ASDDLGEPPDFATAPFR       | 5  | 149255330                                                       | N-Term(iTRAQ4plex)                                 | 1951.95561 | 53 | 103 |  | 4.78 | Expt1 |
| GDDGIFDDNFIEER          | 5  | 31560433                                                        | N-Term(iTRAQ4plex)                                 | 1785.80913 | 53 | 59  |  | 4.16 | Expt1 |
| VTSEPPQGFLEER           | 9  | 21311891                                                        | N-Term(iTRAQ4plex)                                 | 1503.79436 | 53 | 54  |  | 3.65 | Expt1 |
| CQSLTEDELEFR            | 9  | 188219589                                                       | N-Term(iTRAQ4plex), C1(Methylthio)                 | 1530.70769 | 53 | 57  |  | 4.22 | Expt1 |
| GMSVYGLGR               | 5  | 149251847;21312564                                              | N-Term(iTRAQ4plex)                                 | 1083.57585 | 53 | 44  |  | 3.28 | Expt1 |
| ELGVGLALR               | 13 | 8295623;67544450                                                | N-Term(iTRAQ4plex)                                 | 1071.66460 | 53 | 52  |  | 3.39 | Expt1 |
| VDIDVPDNNVEGPMK         | 10 | 61743961                                                        | N-Term(iTRAQ4plex), K16(iTRAQ4plex)                | 2030.04326 | 53 | 76  |  | 4.82 | Expt1 |
| DSAFGLLR                | 25 | 20330802                                                        | N-Term(iTRAQ4plex)                                 | 1022.57720 | 53 | 44  |  | 3.16 | Expt1 |
| LLVTDMSDAEQYR           | 2  | 28076885                                                        | N-Term(iTRAQ4plex)                                 | 1684.83635 | 53 |     |  | 3.05 | Expt1 |
| YEISSVPTFLFFK           | 8  | 31981269                                                        | N-Term(iTRAQ4plex), K13(iTRAQ4plex)                | 1866.03257 | 53 | 49  |  | 4.08 | Expt1 |
| NLQPDPTYTITVVPVYTEGDGGR | 2  | 111074529                                                       | N-Term(iTRAQ4plex), Y8(iTRAQ4plex)                 | 2780.43821 | 52 |     |  | 5.11 | Expt1 |
| GSSYFSMDSAEGR           | 4  | 160333881                                                       | N-Term(iTRAQ4plex), M7(Oxidation)                  | 1553.66948 | 52 | 66  |  | 3.15 | Expt1 |

|                          |    |                                                                     |                                                      |            |    |    |  |      |       |
|--------------------------|----|---------------------------------------------------------------------|------------------------------------------------------|------------|----|----|--|------|-------|
| EMSGDLEQGMLAVVK          | 6  | 149265356;149265358;160707921                                       | N-Term(iTRAQ4plex), K15(iTRAQ4plex)                  | 1894.98918 | 52 | 90 |  | 4.01 | Expt1 |
| VDYAGVTVDLGLK            | 5  | 84794552                                                            | N-Term(iTRAQ4plex), K13(iTRAQ4plex)                  | 1653.90251 | 52 | 81 |  | 4.93 | Expt1 |
| MTLESFSK                 | 7  | 6754090                                                             | N-Term(iTRAQ4plex), K8(iTRAQ4plex)                   | 1230.66985 | 52 | 66 |  | 2.93 | Expt1 |
| IGVLITDGG                | 6  | 111074529                                                           | N-Term(iTRAQ4plex), K9(iTRAQ4plex)                   | 1203.75420 | 52 | 69 |  | 3.43 | Expt1 |
| LDVGNFSWGSECCTR          | 11 | 149257598;149250154;94387984;149264053                              | N-Term(iTRAQ4plex), C12(Methylthio), C13(Methylthio) | 1909.78154 | 52 | 67 |  | 4.19 | Expt1 |
| GYISPYFINTSK             | 5  | 51766670;183396771                                                  | N-Term(iTRAQ4plex), K12(iTRAQ4plex)                  | 1677.91020 | 52 | 61 |  | 4.68 | Expt1 |
| VDLLFLGK                 | 3  | 149257125;149257127;94410719;38142460                               | N-Term(iTRAQ4plex), K8(iTRAQ4plex)                   | 1192.76824 | 52 | 57 |  | 3.52 | Expt1 |
| YFPVFEK                  | 34 | 160298217                                                           | N-Term(iTRAQ4plex), K7(iTRAQ4plex)                   | 1217.68755 | 52 | 56 |  | 2.85 | Expt1 |
| SGNENGEFYLR              | 21 | 149261823;164607147                                                 | N-Term(iTRAQ4plex), N5(Deamidated)                   | 1430.66716 | 52 | 52 |  | 4.26 | Expt1 |
| VSIEVAAPER               | 8  | 158937304                                                           | N-Term(iTRAQ4plex)                                   | 1214.68694 | 52 | 52 |  | 3.46 | Expt1 |
| EQAPAPPTR                | 4  | 226246550;226246552                                                 | N-Term(iTRAQ4plex)                                   | 1167.62712 | 52 | 48 |  | 2.96 | Expt1 |
| YFPAFEK                  | 8  | 31981724                                                            | N-Term(iTRAQ4plex), K7(iTRAQ4plex)                   | 1189.65886 | 52 | 47 |  |      | Expt1 |
| AINTFPYR                 | 23 | 111074529                                                           | N-Term(iTRAQ4plex), N3(Deamidated)                   | 1126.60198 | 52 | 42 |  | 3.35 | Expt1 |
| LFLLQVK                  | 12 | 149266483;157277952;70778915;157277948                              | N-Term(iTRAQ4plex), K7(iTRAQ4plex)                   | 1182.75920 | 52 | 42 |  | 3.11 | Expt1 |
| EMVLEIIR                 | 8  | 224922832;84662730                                                  | N-Term(iTRAQ4plex)                                   | 1146.66802 | 52 | 40 |  | 2.89 | Expt1 |
| TIQVSDFVR                | 2  | 172072617                                                           | N-Term(iTRAQ4plex)                                   | 1208.67290 | 52 | 38 |  |      | Expt1 |
| VIFLENYR                 | 8  | 6755256;24418919;268836255                                          | N-Term(iTRAQ4plex)                                   | 1197.67546 | 52 | 38 |  | 2.94 | Expt1 |
| YLPFVPSR                 | 9  | 10946680                                                            | N-Term(iTRAQ4plex)                                   | 1122.64372 | 52 | 36 |  |      | Expt1 |
| APDFVFYAPR               | 21 | 149266483;157277952;70778915;157277948                              | N-Term(iTRAQ4plex)                                   | 1326.69988 | 52 | 51 |  | 3.97 | Expt1 |
| IPVGPETLGR               | 10 | 31980648                                                            | N-Term(iTRAQ4plex)                                   | 1182.69866 | 52 | 51 |  |      | Expt1 |
| VLDELTLAR                | 39 | 154090941;7106335;6680606;226823220;21489935                        | N-Term(iTRAQ4plex)                                   | 1173.69788 | 52 | 75 |  | 3.16 | Expt1 |
| FLTVMMK                  | 5  | 24762230;149250304;149252400;149252492;149254145;149261725          | N-Term(iTRAQ4plex), K7(iTRAQ4plex)                   | 1157.66106 | 52 | 50 |  |      | Expt1 |
| IYNEIPDINLDVPHSYSVLER    | 3  | 110625656;270309161                                                 | N-Term(iTRAQ4plex)                                   | 2630.36991 | 52 | 49 |  | 4.54 | Expt1 |
| AWTVEQLR                 | 4  | 7305061                                                             | N-Term(iTRAQ4plex)                                   | 1146.63945 | 52 | 40 |  | 3.10 | Expt1 |
| EGMNIVEAMER              | 47 | 6679439                                                             | N-Term(iTRAQ4plex), M3(Oxidation)                    | 1438.68132 | 52 | 60 |  | 3.77 | Expt1 |
| FDLMYAK                  | 11 | 6755901;34740335;6678465;6678467;51765047;8394493;224809300;6678469 | N-Term(iTRAQ4plex), K7(iTRAQ4plex)                   | 1175.64763 | 52 | 51 |  | 3.15 | Expt1 |
| GFTIPEAFR                | 11 | 15617203                                                            | N-Term(iTRAQ4plex)                                   | 1181.64678 | 52 | 43 |  | 3.10 | Expt1 |
| TLTLVDTGIGMTK            | 20 | 40556608;6754254                                                    | N-Term(iTRAQ4plex), M11(Oxidation), K13(iTRAQ4plex)  | 1653.93743 | 52 | 67 |  | 4.20 | Expt1 |
| VFAVITDGR                | 83 | 22203747                                                            | N-Term(iTRAQ4plex)                                   | 1220.71208 | 52 | 50 |  | 3.24 | Expt1 |
| FEIWDTAGQER              | 16 | 28916687;149249575;113866024;13385374                               | N-Term(iTRAQ4plex)                                   | 1495.73430 | 52 | 47 |  | 3.57 | Expt1 |
| INQTYQQQYGR              | 6  | 161016799                                                           | N-Term(iTRAQ4plex)                                   | 1542.77715 | 52 | 46 |  | 4.36 | Expt1 |
| TMLYTPQEMK               | 3  | 149263132;9790083                                                   | N-Term(iTRAQ4plex), K10(iTRAQ4plex)                  | 1529.80083 | 52 | 59 |  | 3.64 | Expt1 |
| GAVGVPDTPTR              | 12 | 110735428;110735426                                                 | N-Term(iTRAQ4plex)                                   | 1213.66802 | 52 | 45 |  | 3.32 | Expt1 |
| QLEESVDSLGEELVQLR        | 8  | 61657921                                                            | N-Term(iTRAQ4plex)                                   | 2088.10086 | 52 | 83 |  | 4.84 | Expt1 |
| ELPDVLER                 | 2  | 6755152                                                             | N-Term(iTRAQ4plex)                                   | 1114.62590 | 52 |    |  | 2.89 | Expt1 |
| VQVALEELQDLK             | 9  | 134288917                                                           | N-Term(iTRAQ4plex), K12(iTRAQ4plex)                  | 1672.98027 | 52 | 89 |  | 4.71 | Expt1 |
| GIFGFTSDCIGK             | 3  | 94409841;256818802;256818806                                        | N-Term(iTRAQ4plex), C10(Methylthio), K13(iTRAQ4plex) | 1693.82451 | 52 | 74 |  | 4.57 | Expt1 |
| TLVLLMGK                 | 18 | 6755040                                                             | N-Term(iTRAQ4plex), K8(iTRAQ4plex)                   | 1162.74565 | 52 | 59 |  | 3.59 | Expt1 |
| TFSHELSDFGLESTTGEVPPVAIR | 5  | 112293264                                                           | N-Term(iTRAQ4plex)                                   | 2735.40927 | 52 | 58 |  | 3.69 | Expt1 |
| AETAPLPTSDTPEVLNR        | 3  | 20149726                                                            | N-Term(iTRAQ4plex)                                   | 2169.11748 | 52 | 61 |  | 4.00 | Expt1 |
| NLPIYSEEIVEMYK           | 13 | 114326446                                                           | N-Term(iTRAQ4plex), K14(iTRAQ4plex)                  | 2016.06609 | 52 | 94 |  | 4.41 | Expt1 |
| GALTVGITNTVGSISR         | 3  | 7305085;7305087                                                     | N-Term(iTRAQ4plex)                                   | 1776.99602 | 52 | 45 |  | 3.41 | Expt1 |
| IVLQIDNAR                | 14 | 6680606;254540068                                                   | N-Term(iTRAQ4plex)                                   | 1185.71037 | 52 | 44 |  | 3.33 | Expt1 |
| ELAVQIYEEAR              | 6  | 25141235;6753620;14861844                                           | N-Term(iTRAQ4plex)                                   | 1464.78569 | 52 | 43 |  | 3.93 | Expt1 |
| WISIMTER                 | 5  | 149260099;6996913                                                   | N-Term(iTRAQ4plex)                                   | 1179.63457 | 52 | 38 |  |      | Expt1 |
| IFNSGADLSGITEENAPLK      | 6  | 6678087                                                             | N-Term(iTRAQ4plex), K19(iTRAQ4plex)                  | 2264.20694 | 52 | 41 |  | 5.75 | Expt1 |

|                      |    |                                                                                     |                                                      |            |    |     |      |      |       |
|----------------------|----|-------------------------------------------------------------------------------------|------------------------------------------------------|------------|----|-----|------|------|-------|
| YQLNLPSPDTECVYR      | 9  | 21553309                                                                            | N-Term(iTRAQ4plex), C13(Methylthio)                  | 2151.00224 | 52 | 59  |      | 3.92 | Expt1 |
| LEALELK              | 12 | 6754090                                                                             | N-Term(iTRAQ4plex), K7(iTRAQ4plex)                   | 1103.69512 | 52 | 57  |      | 3.01 | Expt1 |
| NLEGYVGFANLPNQVYR    | 13 | 28173550                                                                            | N-Term(iTRAQ4plex)                                   | 2098.08867 | 52 | 78  |      | 5.14 | Expt1 |
| MLVDDIGDVITINDGATILK | 3  | 110625624                                                                           | N-Term(iTRAQ4plex), M1(Oxidation), K20(iTRAQ4plex)   | 2408.28879 | 52 | 75  |      | 5.47 | Expt1 |
| DLMVGDSEASLR         | 14 | 22122825                                                                            | N-Term(iTRAQ4plex), M3(Oxidation)                    | 1494.72319 | 52 | 66  |      | 3.55 | Expt1 |
| EGLLAIFK             | 6  | 6671684;28395018                                                                    | N-Term(iTRAQ4plex), K8(iTRAQ4plex)                   | 1178.73674 | 52 | 57  |      | 3.00 | Expt1 |
| ESLWPFLLDK           | 3  | 19527234                                                                            | N-Term(iTRAQ4plex), K10(iTRAQ4plex)                  | 1535.87383 | 52 | 53  |      | 3.41 | Expt1 |
| GSLVPASNANLQAAQDFVR  | 16 | 124249351                                                                           | N-Term(iTRAQ4plex)                                   | 2102.11650 | 52 | 107 | 1.44 | 4.71 | Expt1 |
| LVEVDSGR             | 7  | 188219589                                                                           | N-Term(iTRAQ4plex)                                   | 1018.56554 | 52 | 37  |      | 3.08 | Expt1 |
| WEEAIPLALK           | 4  | 116734870                                                                           | N-Term(iTRAQ4plex), K10(iTRAQ4plex)                  | 1457.86772 | 52 | 69  |      | 3.77 | Expt1 |
| LTWSQAPGR            | 9  | 111074529                                                                           | N-Term(iTRAQ4plex)                                   | 1159.63396 | 52 | 40  |      | 2.83 | Expt1 |
| IAICGAISQYNR         | 10 | 13385466                                                                            | N-Term(iTRAQ4plex), C4(Methylthio)                   | 1498.76181 | 52 | 60  |      | 3.91 | Expt1 |
| GIFPVLCR             | 15 | 31981562                                                                            | N-Term(iTRAQ4plex), C7(Methylthio), K8(iTRAQ4plex)   | 1210.68633 | 52 | 50  |      | 3.12 | Expt1 |
| LLPPTQNNR            | 48 | 6753484                                                                             | N-Term(iTRAQ4plex)                                   | 1196.68559 | 52 | 45  |      | 3.18 | Expt1 |
| LLVSSDYGR            | 6  | 115496850                                                                           | N-Term(iTRAQ4plex)                                   | 1282.67790 | 52 | 43  |      | 3.17 | Expt1 |
| VNADEVGGEALGR        | 6  | 31982300                                                                            | N-Term(iTRAQ4plex)                                   | 1430.73821 | 52 | 54  |      | 4.04 | Expt1 |
| NMMAACDPR            | 7  | 33859488;31981939;7106439;2165384;21746161;149253488;149253527;27754056;12963615    | N-Term(iTRAQ4plex), C6(Methylthio)                   | 1198.49773 | 52 | 37  |      | 3.19 | Expt1 |
| LEMEIETYR            | 43 | 118130981                                                                           | N-Term(iTRAQ4plex), M3(Oxidation)                    | 1343.66455 | 52 | 53  |      | 2.97 | Expt1 |
| STIGVEFATR           | 11 | 31980840;6679583                                                                    | N-Term(iTRAQ4plex)                                   | 1224.67278 | 52 | 54  |      | 3.89 | Expt1 |
| GPELLTMWFGSEANVR     | 10 | 225543319;94408011                                                                  | N-Term(iTRAQ4plex), M7(Oxidation)                    | 2096.02812 | 52 | 45  |      | 4.32 | Expt1 |
| MLGADAVGMSTVPEVIVAR  | 5  | 149265958;183074535;7305395                                                         | N-Term(iTRAQ4plex), M1(Oxidation)                    | 2076.09995 | 52 | 52  |      | 4.30 | Expt1 |
| VLDELTLTR            | 86 | 118130981                                                                           | N-Term(iTRAQ4plex)                                   | 1203.70801 | 52 | 71  |      | 3.58 | Expt1 |
| ATEMVEVGPEDDEVGAER   | 16 | 6679567                                                                             | N-Term(iTRAQ4plex)                                   | 2076.95659 | 52 | 70  |      | 4.33 | Expt1 |
| DFTPVCTTELGR         | 43 | 149241041;28916703;6671549                                                          | N-Term(iTRAQ4plex), C6(Methylthio)                   | 1528.72844 | 52 | 67  |      | 4.06 | Expt1 |
| NFTPVCTTELGR         | 47 | 94371636                                                                            | N-Term(iTRAQ4plex), N1(Deamidated), C6(Methylthio)   | 1528.72844 | 52 | 67  |      | 4.06 | Expt1 |
| NFITAEELR            | 28 | 11230802                                                                            | N-Term(iTRAQ4plex)                                   | 1236.67412 | 52 | 53  |      | 3.46 | Expt1 |
| IDFYFDENPYFENK       | 23 | 56606037;149256951;149260101;149260103                                              | N-Term(iTRAQ4plex), K14(iTRAQ4plex)                  | 2129.01641 | 52 | 80  |      | 4.30 | Expt1 |
| YIDQEELNK            | 8  | 40556608;6754254                                                                    | N-Term(iTRAQ4plex), K9(iTRAQ4plex)                   | 1439.76409 | 52 | 65  |      | 3.98 | Expt1 |
| CLTTNVYLK            | 4  | 12963685                                                                            | N-Term(iTRAQ4plex), C1(Methylthio), K10(iTRAQ4plex)  | 1445.77593 | 52 | 63  |      | 3.59 | Expt1 |
| ELDQWIEQLNECK        | 3  | 9506983                                                                             | N-Term(iTRAQ4plex), C12(Methylthio), K13(iTRAQ4plex) | 1981.96854 | 52 | 55  |      | 4.02 | Expt1 |
| SSGLPITSVDLEDAK      | 3  | 165972309                                                                           | N-Term(iTRAQ4plex), K17(iTRAQ4plex)                  | 1962.06882 | 52 | 45  |      | 4.66 | Expt1 |
| YVASYLLAALGGNSSPSAK  | 20 | 149263166;83745120                                                                  | N-Term(iTRAQ4plex), K19(iTRAQ4plex)                  | 2157.18340 | 52 | 72  |      | 4.88 | Expt1 |
| ALEAEAAGLR           | 4  | 29336026                                                                            | N-Term(iTRAQ4plex)                                   | 1144.64507 | 52 | 36  |      | 3.00 | Expt1 |
| TSDPTMSSFR           | 35 | 111074529                                                                           | N-Term(iTRAQ4plex)                                   | 1272.60173 | 52 | 50  |      | 3.75 | Expt1 |
| SDFNGLNNVLVIELGGNPLK | 8  | 6681143                                                                             | N-Term(iTRAQ4plex), N8(Deamidated), K20(iTRAQ4plex)  | 2402.32340 | 52 | 49  |      | 4.58 | Expt1 |
| AAGVVLEMIR           | 3  | 6755382                                                                             | N-Term(iTRAQ4plex)                                   | 1202.70574 | 52 | 50  |      | 3.62 | Expt1 |
| YGLHFSDQVEVFSPPGSDR  | 2  | 22203747                                                                            | N-Term(iTRAQ4plex)                                   | 2338.12882 | 52 |     |      | 4.02 | Expt1 |
| NLDPFLLFDEFK         | 4  | 51317401                                                                            | N-Term(iTRAQ4plex), K12(iTRAQ4plex)                  | 1785.97245 | 51 | 48  |      | 3.09 | Expt1 |
| DYGVLLSAGIALR        | 3  | 6680690                                                                             | N-Term(iTRAQ4plex)                                   | 1620.91422 | 51 | 79  |      | 3.92 | Expt1 |
| SADYVVTGAWSAK        | 5  | 149258641;149258643;54292132                                                        | N-Term(iTRAQ4plex), K13(iTRAQ4plex)                  | 1642.86785 | 51 | 63  |      | 3.40 | Expt1 |
| LALFNPVSWDR          | 12 | 33563266                                                                            | N-Term(iTRAQ4plex)                                   | 1576.82768 | 51 | 44  |      | 3.98 | Expt1 |
| AGVNTVTLVENK         | 3  | 82801057;149257810;149259749;149260113;94386298;82930638;82949769;82956648;14926884 | N-Term(iTRAQ4plex), K13(iTRAQ4plex)                  | 1633.93851 | 51 | 47  |      | 4.77 | Expt1 |
| QEVVQYEDEPDLR        | 19 | 112421039                                                                           | N-Term(iTRAQ4plex)                                   | 1763.85796 | 51 | 96  |      | 4.68 | Expt1 |
| LTDFGFCQAQITPEQSK    | 8  | 117606272;112181194;46559406                                                        | N-Term(iTRAQ4plex), C7(Methylthio), K16(iTRAQ4plex)  | 2119.04642 | 51 | 62  |      | 4.67 | Expt1 |
| DMGLQELAEQLQTTK      | 7  | 165377185                                                                           | N-Term(iTRAQ4plex), M2(Oxidation), K15(iTRAQ4plex)   | 2009.04636 | 51 | 54  |      | 4.21 | Expt1 |
| TPYLPQDPTYSLLDR      | 4  | 94379918;58082069                                                                   | N-Term(iTRAQ4plex)                                   | 1912.98039 | 51 | 52  |      | 3.27 | Expt1 |
| VLISDSLDPCCR         | 15 | 52353955                                                                            | N-Term(iTRAQ4plex), C10(Methylthio), C11(Methylthio) | 1556.70818 | 51 | 52  |      | 3.68 | Expt1 |



|                      |    |                                                                                                    |                                                     |            |    |    |      |       |
|----------------------|----|----------------------------------------------------------------------------------------------------|-----------------------------------------------------|------------|----|----|------|-------|
| GSPMALLAAR           | 6  | 161484644                                                                                          | N-Term(iTRAQ4plex)                                  | 1243.73467 | 51 | 73 | 3.24 | Expt1 |
| VLIEGSINSVR          | 9  | 13386054                                                                                           | N-Term(iTRAQ4plex)                                  | 1330.78545 | 51 | 71 | 3.83 | Expt1 |
| LVDIICDK             | 4  | 149264760;149264762;13470090;15042957                                                              | N-Term(iTRAQ4plex), C6(Methylthio), K8(iTRAQ4plex)  | 1252.68779 | 51 | 67 | 3.15 | Expt1 |
| DELLASGVDR           | 17 | 126518317                                                                                          | N-Term(iTRAQ4plex)                                  | 1331.73223 | 51 | 64 | 3.92 | Expt1 |
| ILDIESGK             | 3  | 85861182                                                                                           | N-Term(iTRAQ4plex), K9(iTRAQ4plex)                  | 1275.78606 | 51 | 62 | 2.92 | Expt1 |
| DANNMPVTAR           | 17 | 6671549                                                                                            | N-Term(iTRAQ4plex)                                  | 1232.62065 | 51 | 61 | 3.85 | Expt1 |
| DFDSVPPVVR           | 8  | 126518317                                                                                          | N-Term(iTRAQ4plex)                                  | 1274.68962 | 51 | 56 | 3.06 | Expt1 |
| ILVATNLFGR           | 14 | 9790069;38372907                                                                                   | N-Term(iTRAQ4plex)                                  | 1247.76238 | 51 | 55 | 3.39 | Expt1 |
| LVIESDLER            | 3  | 31560030;256000780;256000786;256000790;256000792;256000796;256000782;256000788;256000794;256000784 | N-Term(iTRAQ4plex)                                  | 1330.77300 | 51 | 54 | 3.28 | Expt1 |
| FSPAGPILSIR          | 26 | 149271821;31560656;255652857                                                                       | N-Term(iTRAQ4plex)                                  | 1301.77251 | 51 | 54 | 3.29 | Expt1 |
| LQLEDLER             | 3  | 114326497                                                                                          | N-Term(iTRAQ4plex)                                  | 1272.73076 | 51 | 54 | 3.13 | Expt1 |
| ELLIIGVVAAR          | 9  | 19527256                                                                                           | N-Term(iTRAQ4plex)                                  | 1255.78691 | 51 | 52 | 3.49 | Expt1 |
| EGLLLWCQR            | 20 | 61097906;11230802;7304855;157951643                                                                | N-Term(iTRAQ4plex), C7(Methylthio)                  | 1307.67766 | 51 | 48 | 3.58 | Expt1 |
| DLQMVNISR            | 8  | 126723336                                                                                          | N-Term(iTRAQ4plex)                                  | 1332.74626 | 51 | 47 | 3.24 | Expt1 |
| SILFVPTSAPR          | 28 | 6755863                                                                                            | N-Term(iTRAQ4plex)                                  | 1331.78264 | 51 | 44 | 3.44 | Expt1 |
| LNYLDILLR            | 7  | 31982236                                                                                           | N-Term(iTRAQ4plex)                                  | 1276.77788 | 51 | 43 | 3.33 | Expt1 |
| LLVSMCQGNR           | 5  | 160707958                                                                                          | N-Term(iTRAQ4plex), C6(Methylthio)                  | 1310.64787 | 51 | 43 | 3.13 | Expt1 |
| VEFILEQMR            | 3  | 13385384                                                                                           | N-Term(iTRAQ4plex)                                  | 1308.71440 | 51 | 42 | 3.49 | Expt1 |
| VVLFMEAR             | 5  | 25141335                                                                                           | N-Term(iTRAQ4plex)                                  | 1237.67339 | 51 | 39 | 3.34 | Expt1 |
| FQIEANFPR            | 2  | 158533976                                                                                          | N-Term(iTRAQ4plex)                                  | 1265.67693 | 51 | 36 |      | Expt1 |
| TNCDLYEK             | 3  | 163310765                                                                                          | N-Term(iTRAQ4plex), C3(Methylthio), K8(iTRAQ4plex)  | 1319.62786 | 51 | 37 | 2.91 | Expt1 |
| VADIGLAAWGR          | 6  | 149267883;262263372                                                                                | N-Term(iTRAQ4plex)                                  | 1272.72258 | 51 | 53 | 3.31 | Expt1 |
| AADEEAFEDNSEYIR      | 6  | 12963737                                                                                           | N-Term(iTRAQ4plex)                                  | 2031.88530 | 51 | 85 | 4.68 | Expt1 |
| YIVQNPEQEPLSPFLR     | 15 | 31657132                                                                                           | N-Term(iTRAQ4plex)                                  | 2074.11161 | 51 | 66 | 4.70 | Expt1 |
| MVLPDVGPR            | 13 | 111185907                                                                                          | N-Term(iTRAQ4plex)                                  | 1224.69158 | 51 | 54 | 2.99 | Expt1 |
| AAVLGESAGLVR         | 4  | 124249351                                                                                          | N-Term(iTRAQ4plex)                                  | 1286.75713 | 51 | 43 | 2.99 | Expt1 |
| TALINSTGEEVAMR       | 12 | 9506843;162287370;161760667                                                                        | N-Term(iTRAQ4plex), M13(Oxidation)                  | 1651.84531 | 51 | 63 | 4.09 | Expt1 |
| GIAGLGDVAEVR         | 8  | 24418919                                                                                           | N-Term(iTRAQ4plex)                                  | 1300.73699 | 51 | 68 | 3.88 | Expt1 |
| TDITYPAGFMDVISDK     | 8  | 6677805                                                                                            | N-Term(iTRAQ4plex), K17(iTRAQ4plex)                 | 2174.13262 | 51 | 81 | 4.65 | Expt1 |
| GVDLVNLSLAEEK        | 9  | 93102409                                                                                           | N-Term(iTRAQ4plex), K13(iTRAQ4plex)                 | 1674.95964 | 51 | 76 | 4.23 | Expt1 |
| NLMQLNMAK            | 10 | 6680554                                                                                            | N-Term(iTRAQ4plex), M3(Oxidation), K9(iTRAQ4plex)   | 1366.75066 | 51 | 47 | 3.60 | Expt1 |
| VPEGVAGAPNEAALLALIER | 3  | 188497698                                                                                          | N-Term(iTRAQ4plex)                                  | 2134.20517 | 51 | 72 | 4.31 | Expt1 |
| SEINVEGPPR           | 2  | 34915988;116014342                                                                                 | N-Term(iTRAQ4plex)                                  | 1241.66203 | 51 |    | 3.72 | Expt1 |
| DFTLAMAAR            | 3  | 86439989                                                                                           | N-Term(iTRAQ4plex)                                  | 1139.60210 | 51 | 41 | 3.49 | Expt1 |
| GLLNAIVIR            | 12 | 8393866                                                                                            | N-Term(iTRAQ4plex)                                  | 1112.72722 | 51 | 54 | 3.30 | Expt1 |
| MQANADQVER           | 10 | 111185907                                                                                          | N-Term(iTRAQ4plex)                                  | 1305.63469 | 51 | 61 | 3.81 | Expt1 |
| MGAGMGFGLER          | 4  | 21313308;158186704                                                                                 | N-Term(iTRAQ4plex)                                  | 1269.62309 | 51 | 55 | 3.14 | Expt1 |
| LATELQTLK            | 3  | 111185907                                                                                          | N-Term(iTRAQ4plex), K9(iTRAQ4plex)                  | 1304.81438 | 51 | 57 | 3.62 | Expt1 |
| LPSLAFLYMEK          | 7  | 229608920                                                                                          | N-Term(iTRAQ4plex), K11(iTRAQ4plex)                 | 1599.90818 | 51 | 46 | 3.75 | Expt1 |
| YSQVLANGLNDK         | 6  | 6755368;149252587;149259085;149263957;149264584;149264635                                          | N-Term(iTRAQ4plex), N7(Deamidated), K12(iTRAQ4plex) | 1610.86711 | 51 | 65 | 4.91 | Expt1 |
| TVDFEQDSNYLLTGGQDK   | 3  | 160707896                                                                                          | N-Term(iTRAQ4plex), K18(iTRAQ4plex)                 | 2290.15079 | 51 | 51 | 4.64 | Expt1 |
| VPYFIDLK             | 4  | 159110817                                                                                          | N-Term(iTRAQ4plex), K8(iTRAQ4plex)                  | 1282.75981 | 51 | 67 | 2.87 | Expt1 |
| DQNTVETLQR           | 6  | 117938332;117938334                                                                                | N-Term(iTRAQ4plex)                                  | 1347.69951 | 51 | 46 | 4.35 | Expt1 |
| YALYDATYETK          | 10 | 149255823;6680924;6671746                                                                          | N-Term(iTRAQ4plex), K11(iTRAQ4plex)                 | 1625.83635 | 51 | 83 | 4.44 | Expt1 |
| VEDYDADEEVQLVK       | 6  | 10048460                                                                                           | N-Term(iTRAQ4plex), K14(iTRAQ4plex)                 | 1939.97185 | 51 | 77 | 5.18 | Expt1 |
| AELNEFLTR            | 16 | 6755372                                                                                            | N-Term(iTRAQ4plex)                                  | 1236.67180 | 51 | 49 | 3.62 | Expt1 |
| VVDALSGLK            | 5  | 6753428                                                                                            | N-Term(iTRAQ4plex), K10(iTRAQ4plex)                 | 1288.81316 | 51 | 45 | 3.80 | Expt1 |
| QAFQIGSPWR           | 3  | 7106242;85861182                                                                                   | N-Term(iTRAQ4plex)                                  | 1333.71538 | 51 | 43 | 3.85 | Expt1 |
| DGEAPDPEDPSR         | 14 | 116734870                                                                                          | N-Term(iTRAQ4plex)                                  | 1428.63762 | 51 | 49 | 3.62 | Expt1 |

|                         |    |                                                                                                           |                                                                         |            |    |     |      |       |       |
|-------------------------|----|-----------------------------------------------------------------------------------------------------------|-------------------------------------------------------------------------|------------|----|-----|------|-------|-------|
| IDIIPNPQER              | 22 | 40556608                                                                                                  | N-Term(iTRAQ4plex)                                                      | 1338.75139 | 51 | 43  | 3.31 | Expt1 |       |
| EIEDPEDR                | 5  | 6671664                                                                                                   | N-Term(iTRAQ4plex)                                                      | 1146.54204 | 51 | 44  | 2.96 | Expt1 |       |
| VLYVQDSLEGEAR           | 8  | 6755152                                                                                                   | N-Term(iTRAQ4plex)                                                      | 1622.85393 | 51 | 67  | 3.98 | Expt1 |       |
| LQIEEDAAR               | 18 | 111185907                                                                                                 | N-Term(iTRAQ4plex)                                                      | 1188.63664 | 51 | 50  | 3.56 | Expt1 |       |
| SLSQQIENIR              | 6  | 34328108                                                                                                  | N-Term(iTRAQ4plex)                                                      | 1331.74187 | 51 | 48  | 3.81 | Expt1 |       |
| SLEEAEAYSR              | 4  | 124249090                                                                                                 | N-Term(iTRAQ4plex)                                                      | 1298.63286 | 51 | 50  | 3.39 | Expt1 |       |
| SETSGSFEDALLAIVK        | 7  | 161016799                                                                                                 | N-Term(iTRAQ4plex), K16(iTRAQ4plex)                                     | 1955.05620 | 51 | 63  | 4.93 | Expt1 |       |
| DFFLANASR               | 10 | 160333229                                                                                                 | N-Term(iTRAQ4plex)                                                      | 1184.62029 | 51 | 54  | 3.17 | Expt1 |       |
| ALAESWNAAFLESSAK        | 4  | 149253589;28626508                                                                                        | N-Term(iTRAQ4plex), K16(iTRAQ4plex)                                     | 1983.04497 | 51 | 95  | 1.20 | 4.58  | Expt1 |
| EVVYFGLQYVDNK           | 5  | 149266483                                                                                                 | N-Term(iTRAQ4plex), K13(iTRAQ4plex)                                     | 1949.01596 | 51 | 50  | 3.65 | Expt1 |       |
| DMSIQELAVLVSGQK         | 3  | 112421039                                                                                                 | N-Term(iTRAQ4plex), M2(Oxidation), K15(iTRAQ4plex)                      | 1922.06430 | 51 | 47  | 3.84 | Expt1 |       |
| QETEVELYNEFPEPIK        | 6  | 148747526                                                                                                 | N-Term(iTRAQ4plex), K16(iTRAQ4plex)                                     | 2253.15689 | 51 | 44  | 4.15 | Expt1 |       |
| WLPYEAGQR               | 5  | 82950147;82950149;14926408<br>6                                                                           | N-Term(iTRAQ4plex)                                                      | 1263.66228 | 51 | 38  |      | Expt1 |       |
| LAPEVMEDLVK             | 4  | 6755983                                                                                                   | N-Term(iTRAQ4plex), K11(iTRAQ4plex)                                     | 1531.86261 | 51 | 53  | 3.74 | Expt1 |       |
| YPGAYIFQIK              | 17 | 6753824                                                                                                   | N-Term(iTRAQ4plex), K11(iTRAQ4plex)                                     | 1650.91423 | 51 | 70  | 3.85 | Expt1 |       |
| EYEELLASVR              | 9  | 31657132                                                                                                  | N-Term(iTRAQ4plex)                                                      | 1352.72112 | 51 | 62  | 3.93 | Expt1 |       |
| YPMVAVGLNK              | 3  | 149262233;149249185;828945<br>66;82898629;149255394;82922<br>589;94385943;149262863;9439<br>8900;82958658 | N-Term(iTRAQ4plex), K9(iTRAQ4plex)                                      | 1280.72527 | 51 | 62  | 3.36 | Expt1 |       |
| ILLTPMAAGSR             | 28 | 111074529                                                                                                 | N-Term(iTRAQ4plex)                                                      | 1273.74187 | 51 | 48  | 3.27 | Expt1 |       |
| QEIAEINR                | 7  | 51092301;54607171;11319568<br>4                                                                           | N-Term(iTRAQ4plex)                                                      | 1116.61467 | 51 | 49  |      | Expt1 |       |
| AAALEFLNR               | 10 | 14389431                                                                                                  | N-Term(iTRAQ4plex)                                                      | 1148.65544 | 51 | 48  | 3.49 | Expt1 |       |
| VVFMSLCK                | 4  | 33469047                                                                                                  | N-Term(iTRAQ4plex), C7(Methylthio), K8(iTRAQ4plex)                      | 1260.68791 | 51 | 54  | 3.26 | Expt1 |       |
| VFASLPQVER              | 7  | 6755995                                                                                                   | N-Term(iTRAQ4plex)                                                      | 1289.73491 | 51 | 44  | 3.59 | Expt1 |       |
| SPSGGAAGPLLTPSQSLDGSR   | 6  | 123701966                                                                                                 | N-Term(iTRAQ4plex)                                                      | 2099.08989 | 51 | 52  | 4.47 | Expt1 |       |
| DPNASPGDAGEQAIR         | 9  | 31543942                                                                                                  | N-Term(iTRAQ4plex)                                                      | 1641.79314 | 51 | 72  | 3.57 | Expt1 |       |
| ALESSIAPIVIFASNR        | 14 | 9790083                                                                                                   | N-Term(iTRAQ4plex)                                                      | 1832.04233 | 51 | 45  | 4.63 | Expt1 |       |
| LVLVGGGGVVK             | 3  | 21704066;149261508                                                                                        | N-Term(iTRAQ4plex), K11(iTRAQ4plex)                                     | 1273.81694 | 51 | 56  | 3.70 | Expt1 |       |
| SDIGEVLVGGMTR           | 10 | 162461907                                                                                                 | N-Term(iTRAQ4plex)                                                      | 1590.86699 | 51 | 61  | 4.65 | Expt1 |       |
| FAFQAEVNR               | 7  | 6755863                                                                                                   | N-Term(iTRAQ4plex)                                                      | 1225.64580 | 51 | 42  | 3.12 | Expt1 |       |
| APSTYGGMSVTSSR          | 4  | 21489935                                                                                                  | N-Term(iTRAQ4plex), M8(Oxidation)                                       | 1560.74846 | 51 | 47  | 3.79 | Expt1 |       |
| EALNVFGDDYATEDGTGVR     | 4  | 30409988                                                                                                  | N-Term(iTRAQ4plex)                                                      | 2173.01665 | 51 | 75  | 4.98 | Expt1 |       |
| LPPPPGECTFDQDECAFTQEK   | 13 | 33469047                                                                                                  | N-Term(iTRAQ4plex), C8(Methylthio), C15(Methylthio),<br>K21(iTRAQ4plex) | 2732.19962 | 51 | 72  | 5.18 | Expt1 |       |
| LGDLYEEEMR              | 13 | 31982755                                                                                                  | N-Term(iTRAQ4plex)                                                      | 1398.66948 | 51 | 47  | 3.72 | Expt1 |       |
| MDMSLDDIHK              | 3  | 6755763;148238335                                                                                         | N-Term(iTRAQ4plex), K10(iTRAQ4plex)                                     | 1468.77471 | 51 | 69  | 4.18 | Expt1 |       |
| CDENILWLDYK             | 15 | 31981562                                                                                                  | N-Term(iTRAQ4plex), C1(Methylthio), K11(iTRAQ4plex)                     | 1745.85369 | 51 | 66  | 1.21 | 4.26  | Expt1 |
| IMNVIGEPIDER            | 5  | 31980648                                                                                                  | N-Term(iTRAQ4plex), M2(Oxidation)                                       | 1545.81108 | 51 | 55  | 3.06 | Expt1 |       |
| GFFDPNTHENLTYLQLLR      | 2  | 37537522                                                                                                  | N-Term(iTRAQ4plex)                                                      | 2322.20285 | 51 |     | 3.36 | Expt1 |       |
| CSATGNPTMLEWIGGPGSQLPAK | 4  | 149253040;183979966                                                                                       | N-Term(iTRAQ4plex), C1(Methylthio), K24(iTRAQ4plex)                     | 2746.36832 | 51 | 44  | 4.40 | Expt1 |       |
| AGEVINQPMMAAR           | 6  | 31543942                                                                                                  | N-Term(iTRAQ4plex)                                                      | 1662.82536 | 51 | 55  | 4.42 | Expt1 |       |
| CNEPAVWSQLAK            | 5  | 51491845                                                                                                  | N-Term(iTRAQ4plex), C1(Methylthio), K12(iTRAQ4plex)                     | 1679.84575 | 51 | 61  | 4.18 | Expt1 |       |
| ELLIFNQQQVPSGESAILDR    | 5  | 20806109                                                                                                  | N-Term(iTRAQ4plex)                                                      | 2401.29251 | 51 | 58  | 5.65 | Expt1 |       |
| LVADFMAK                | 3  | 6724311                                                                                                   | N-Term(iTRAQ4plex), M6(Oxidation), K8(iTRAQ4plex)                       | 1198.67815 | 51 | 43  | 3.00 | Expt1 |       |
| GACYPPVGDLLIGR          | 3  | 113865981                                                                                                 | N-Term(iTRAQ4plex), C3(Methylthio)                                      | 1620.83977 | 51 | 43  | 3.04 | Expt1 |       |
| NTDEMVELR               | 9  | 13384620                                                                                                  | N-Term(iTRAQ4plex)                                                      | 1250.61711 | 50 | 50  | 3.45 | Expt1 |       |
| ALSQPDTVLR              | 22 | 31981748;285402638;2854026<br>59                                                                          | N-Term(iTRAQ4plex)                                                      | 1243.71379 | 50 | 54  | 3.83 | Expt1 |       |
| NAVTVQFPGVPDTR          | 7  | 18079339                                                                                                  | N-Term(iTRAQ4plex)                                                      | 1745.89543 | 50 | 85  | 4.71 | Expt1 |       |
| GYDVIAQAQSGTGK          | 3  | 176865892;21450625;1768660<br>61;149270417;226823309                                                      | N-Term(iTRAQ4plex), K14(iTRAQ4plex)                                     | 1682.89287 | 50 | 108 | 4.46 | Expt1 |       |
| LVCDLITSTK              | 3  | 61102728                                                                                                  | N-Term(iTRAQ4plex), C3(Methylthio), K10(iTRAQ4plex)                     | 1426.79473 | 50 | 68  | 3.83 | Expt1 |       |
| FSMVQVWPVR              | 8  | 31560731                                                                                                  | N-Term(iTRAQ4plex)                                                      | 1392.76189 | 50 | 55  | 3.96 | Expt1 |       |
| TLLELIPELR              | 6  | 134031976                                                                                                 | N-Term(iTRAQ4plex)                                                      | 1340.82854 | 50 | 53  | 3.50 | Expt1 |       |
| LILDSAR                 | 83 | 6678359                                                                                                   | N-Term(iTRAQ4plex)                                                      | 931.57067  | 50 | 48  | 3.29 | Expt1 |       |

|                                    |    |                              |                                                      |            |    |    |      |       |
|------------------------------------|----|------------------------------|------------------------------------------------------|------------|----|----|------|-------|
| GLQGSFEELCR                        | 3  | 31560705                     | N-Term(iTRAQ4plex), C10(Methylthio)                  | 1428.67497 | 50 | 60 | 4.14 | Expt1 |
| GVTQYYAYVTER                       | 4  | 6681159                      | N-Term(iTRAQ4plex)                                   | 1593.80400 | 50 | 43 | 3.62 | Expt1 |
| FYGPAGPYGIFAGR                     | 3  | 226442772                    | N-Term(iTRAQ4plex)                                   | 1616.83940 | 50 | 54 | 4.36 | Expt1 |
| NVGSAGVTVVIVR                      | 8  | 149258641;149258643;54292132 | N-Term(iTRAQ4plex)                                   | 1414.85124 | 50 | 98 | 4.40 | Expt1 |
| AILILDNDGDR                        | 5  | 9789913                      | N-Term(iTRAQ4plex)                                   | 1358.74004 | 50 | 67 | 3.40 | Expt1 |
| ALPILELLK                          | 3  | 158517929                    | N-Term(iTRAQ4plex), K10(iTRAQ4plex)                  | 1426.91619 | 50 | 63 | 3.69 | Expt1 |
| IGTQEQLNQR                         | 5  | 55926127                     | N-Term(iTRAQ4plex)                                   | 1443.80718 | 50 | 62 | 3.93 | Expt1 |
| AGLSSGFVGCVR                       | 3  | 149253040;183979966          | N-Term(iTRAQ4plex), C10(Methylthio)                  | 1342.67485 | 50 | 62 | 3.77 | Expt1 |
| DPLTLFEEK                          | 3  | 33468897                     | N-Term(iTRAQ4plex), K9(iTRAQ4plex)                   | 1379.76995 | 50 | 61 | 3.22 | Expt1 |
| MSVEADINGLR                        | 15 | 154090941;7106335;21489935   | N-Term(iTRAQ4plex), N8(Deamidated)                   | 1349.68913 | 50 | 60 | 3.33 | Expt1 |
| TLPFYFVQK                          | 3  | 171543897                    | N-Term(iTRAQ4plex), K9(iTRAQ4plex)                   | 1430.83537 | 50 | 60 | 2.94 | Expt1 |
| SPGQDPIPIVLR                       | 9  | 225543424;225543420          | N-Term(iTRAQ4plex)                                   | 1435.84233 | 50 | 59 | 3.31 | Expt1 |
| ILIGFPLGSSLR                       | 24 | 167736365                    | N-Term(iTRAQ4plex)                                   | 1416.87224 | 50 | 57 | 3.57 | Expt1 |
| IVFADGNFWGR                        | 4  | 8393866                      | N-Term(iTRAQ4plex)                                   | 1425.74407 | 50 | 53 | 3.59 | Expt1 |
| LLLNNNDLLR                         | 12 | 149234244;161086971;6671672  | N-Term(iTRAQ4plex)                                   | 1341.79924 | 50 | 53 | 3.44 | Expt1 |
| LSILYPATTGR                        | 47 | 6671549                      | N-Term(iTRAQ4plex)                                   | 1335.77483 | 50 | 52 | 3.66 | Expt1 |
| GAMAATYSALNR                       | 3  | 22507357                     | N-Term(iTRAQ4plex)                                   | 1369.70244 | 50 | 50 | 3.44 | Expt1 |
| EVVLQVDEER                         | 3  | 29336026                     | N-Term(iTRAQ4plex)                                   | 1359.72563 | 50 | 49 | 3.55 | Expt1 |
| NAVLAIYTIYR                        | 3  | 15426055                     | N-Term(iTRAQ4plex)                                   | 1440.83586 | 50 | 49 | 3.59 | Expt1 |
| AVIDAAETSSLR                       | 5  | 145207948                    | N-Term(iTRAQ4plex)                                   | 1376.75261 | 50 | 47 | 3.56 | Expt1 |
| AFIITGQTYTR                        | 4  | 29788764                     | N-Term(iTRAQ4plex)                                   | 1414.78252 | 50 | 37 | 3.04 | Expt1 |
| YLFLLGDYVDR                        | 5  | 42415473;6679447;45592930    | N-Term(iTRAQ4plex)                                   | 1404.73174 | 50 |    | 3.08 | Expt1 |
| TLFSSQIEELNLPK                     | 14 | 148747546                    | N-Term(iTRAQ4plex), K14(iTRAQ4plex)                  | 1907.07939 | 50 | 96 | 4.89 | Expt1 |
| DFQEVYVEGEDFPASPQR                 | 10 | 22122795                     | N-Term(iTRAQ4plex)                                   | 2255.03911 | 50 | 63 | 4.31 | Expt1 |
| YDDMATCMK                          | 5  | 149263879;6756039            | N-Term(iTRAQ4plex), C7(Methylthio), K9(iTRAQ4plex)   | 1411.59917 | 50 | 61 | 3.26 | Expt1 |
| SLNNQFASFDK                        | 6  | 145580629                    | N-Term(iTRAQ4plex), N3(Deamidated), K12(iTRAQ4plex)  | 1672.87981 | 50 | 82 | 4.40 | Expt1 |
| TDYMVGSYGPR                        | 4  | 31982030                     | N-Term(iTRAQ4plex)                                   | 1389.66106 | 50 | 60 | 3.37 | Expt1 |
| ALSAGNIDDALQCYSEAIK                | 10 | 14389431                     | N-Term(iTRAQ4plex), C13(Methylthio), K19(iTRAQ4plex) | 2316.15012 | 50 | 71 | 4.27 | Expt1 |
| SEIDLVIQIK                         | 3  | 160707958                    | N-Term(iTRAQ4plex), K9(iTRAQ4plex)                   | 1332.80754 | 50 | 56 | 3.95 | Expt1 |
| CPPGFYTPDGTGR                      | 6  | 118197277                    | N-Term(iTRAQ4plex), C1(Methylthio)                   | 1587.70610 | 50 | 45 | 2.96 | Expt1 |
| VLTWESGMR                          | 24 | 111074529                    | N-Term(iTRAQ4plex)                                   | 1222.63774 | 50 | 45 | 3.12 | Expt1 |
| LSSEMNTSTVNSAR                     | 6  | 188219589                    | N-Term(iTRAQ4plex), M5(Oxidation)                    | 1656.79997 | 50 | 84 | 4.44 | Expt1 |
| GICVADPYEIR                        | 9  | 126518317                    | N-Term(iTRAQ4plex), C3(Methylthio)                   | 1425.70342 | 50 | 38 | 4.03 | Expt1 |
| TDPSIMGGMIVR                       | 8  | 149251053                    | N-Term(iTRAQ4plex)                                   | 1420.74187 | 50 | 62 | 3.73 | Expt1 |
| SFESTVGGSDTYSYIFR                  | 3  | 14916479                     | N-Term(iTRAQ4plex)                                   | 2188.03562 | 50 | 49 | 4.78 | Expt1 |
| DGVTGPGFTLSGCCQGR                  | 7  | 19526946                     | N-Term(iTRAQ4plex), C14(Methylthio), C15(Methylthio) | 2074.89750 | 50 | 52 | 3.61 | Expt1 |
| GFSEGLWEIENNPTVK                   | 3  | 188497724                    | N-Term(iTRAQ4plex), K16(iTRAQ4plex)                  | 2108.09269 | 50 | 51 | 4.27 | Expt1 |
| ELLQPVTISR                         | 45 | 13386054                     | N-Term(iTRAQ4plex)                                   | 1412.86247 | 50 | 69 | 3.80 | Expt1 |
| FMTEDTTDAPFR                       | 5  | 114158675                    | N-Term(iTRAQ4plex)                                   | 1574.72856 | 50 | 38 | 4.13 | Expt1 |
| TLEVEIEPQVGR                       | 5  | 110625998                    | N-Term(iTRAQ4plex)                                   | 1385.77886 | 50 | 48 | 3.20 | Expt1 |
| IILQGSPPVQMAEDAVDGER               | 3  | 126518317                    | N-Term(iTRAQ4plex)                                   | 2271.18271 | 50 | 70 | 5.89 | Expt1 |
| LAEDFR                             | 31 | 21592285;149262636;118130981 | N-Term(iTRAQ4plex)                                   | 965.52080  | 50 | 41 | 2.98 | Expt1 |
| FLAEEGFYK                          | 3  | 148747128                    | N-Term(iTRAQ4plex), K9(iTRAQ4plex)                   | 1391.74285 | 50 | 60 | 3.52 | Expt1 |
| LVINTVEPSAVR                       | 5  | 18874094                     | N-Term(iTRAQ4plex)                                   | 1441.85100 | 50 | 61 | 3.43 | Expt1 |
| TPSALAIENANVLAR                    | 17 | 60687506                     | N-Term(iTRAQ4plex)                                   | 1797.03952 | 50 | 77 | 4.44 | Expt1 |
| LPQLAEALLPPR                       | 3  | 11496255                     | N-Term(iTRAQ4plex)                                   | 1390.85637 | 50 | 56 | 3.45 | Expt1 |
| GLAVFISDIR                         | 9  | 6671561;116256510;163644277  | N-Term(iTRAQ4plex)                                   | 1234.73113 | 50 | 43 | 3.34 | Expt1 |
| IYQIYEGTAQIQR                      | 8  | 6680618                      | N-Term(iTRAQ4plex)                                   | 1726.92827 | 50 | 63 | 4.20 | Expt1 |
| YDDMAACMK                          | 11 | 149269348;6756041            | N-Term(iTRAQ4plex), C7(Methylthio), K9(iTRAQ4plex)   | 1381.58000 | 50 | 61 | 3.70 | Expt1 |
| DQVDSAVQELLQLK                     | 7  | 94364712;82617575            | N-Term(iTRAQ4plex), K14(iTRAQ4plex)                  | 1874.05405 | 50 | 50 | 4.46 | Expt1 |
| ELSGLPSGSPVSGPPPPPPPPPISTSSGSDSASR | 7  | 157951604                    | N-Term(iTRAQ4plex)                                   | 3762.86386 | 50 | 47 | 4.41 | Expt1 |
| MFFDAELSQMQTHVSDTSVVLMSMDNNR       | 5  | 20911031                     | N-Term(iTRAQ4plex)                                   | 3246.50608 | 50 | 42 | 5.66 | Expt1 |

|                     |    |                                                                                                          |                                                     |            |    |     |      |       |
|---------------------|----|----------------------------------------------------------------------------------------------------------|-----------------------------------------------------|------------|----|-----|------|-------|
| LFEVGGSPANTR        | 3  | 42415473;45592930                                                                                        | N-Term(iTRAQ4plex)                                  | 1391.74199 | 50 | 47  | 3.27 | Expt1 |
| SLETENAGLR          | 6  | 162287370;161760667                                                                                      | N-Term(iTRAQ4plex)                                  | 1233.65666 | 50 | 62  | 3.45 | Expt1 |
| IMPALALQLR          | 8  | 8394362                                                                                                  | N-Term(iTRAQ4plex)                                  | 1366.83830 | 50 | 51  | 3.23 | Expt1 |
| FTITPPSAQVVGVLK     | 3  | 149234244;161086971                                                                                      | N-Term(iTRAQ4plex), K15(iTRAQ4plex)                 | 1845.11332 | 50 | 44  | 4.72 | Expt1 |
| CLLPEGASELR         | 3  | 227499103;227499234                                                                                      | N-Term(iTRAQ4plex), C1(Methylthio)                  | 1377.70000 | 50 | 52  | 2.98 | Expt1 |
| AQIWDTAGLER         | 8  | 31980838                                                                                                 | N-Term(iTRAQ4plex)                                  | 1403.74187 | 50 | 52  | 3.43 | Expt1 |
| EQASGVVSFEQPEYSVSR  | 2  | 110735428;110735426                                                                                      | N-Term(iTRAQ4plex)                                  | 2143.04514 | 50 |     | 3.48 | Expt1 |
| NTLAQTENLR          | 5  | 82950147;149264086                                                                                       | N-Term(iTRAQ4plex)                                  | 1404.75823 | 50 | 52  | 4.00 | Expt1 |
| EIQTAVR             | 22 | 68131547;68226433;30061385;<br>149264032;160420312;283167<br>50;28316760;160420308;30089<br>704;30061387 | N-Term(iTRAQ4plex)                                  | 960.55962  | 50 | 43  | 2.93 | Expt1 |
| TFNVVEMTR           | 4  | 149269288                                                                                                | N-Term(iTRAQ4plex)                                  | 1240.64983 | 50 | 35  | 3.29 | Expt1 |
| AQYEAMAEQNR         | 90 | 122425580;118130981                                                                                      | N-Term(iTRAQ4plex), M6(Oxidation)                   | 1470.68279 | 50 | 56  | 4.35 | Expt1 |
| MYLETDPGSR          | 7  | 226246550;226246552                                                                                      | N-Term(iTRAQ4plex)                                  | 1312.63054 | 50 | 45  | 3.50 | Expt1 |
| YTPPEDTPEPGDPR      | 5  | 47271396;117959921;1179599<br>28;117959930                                                               | N-Term(iTRAQ4plex)                                  | 1918.88152 | 50 | 51  | 4.05 | Expt1 |
| DQPFTILYR           | 21 | 6753824                                                                                                  | N-Term(iTRAQ4plex)                                  | 1296.70842 | 50 | 53  | 3.65 | Expt1 |
| EEIVYLPCLYR         | 3  | 149251616;9507079                                                                                        | N-Term(iTRAQ4plex), C8(Methylthio)                  | 1587.81047 | 50 | 37  | 3.71 | Expt1 |
| FELSGIPPAPR         | 21 | 124339829;124339826                                                                                      | N-Term(iTRAQ4plex)                                  | 1327.75420 | 50 | 56  | 3.67 | Expt1 |
| VAGEGCYVLTSLK       | 27 | 148277039                                                                                                | N-Term(iTRAQ4plex), C6(Methylthio), K14(iTRAQ4plex) | 1801.94756 | 50 | 101 | 4.98 | Expt1 |
| TDDPLLQLLQK         | 5  | 21312256                                                                                                 | N-Term(iTRAQ4plex), K11(iTRAQ4plex)                 | 1571.92912 | 50 | 65  | 3.77 | Expt1 |
| IFGVTTLDIR          | 17 | 31982186                                                                                                 | N-Term(iTRAQ4plex)                                  | 1377.82312 | 50 | 60  | 3.78 | Expt1 |
| YTMGDAPDFDR         | 3  | 6754084                                                                                                  | N-Term(iTRAQ4plex)                                  | 1431.63323 | 50 | 48  | 3.69 | Expt1 |
| LVFDGLR             | 3  | 82950147;82950149;14926408<br>6                                                                          | N-Term(iTRAQ4plex)                                  | 963.57634  | 50 | 39  |      | Expt1 |
| EDLSPFIQMAAEYVQR    | 3  | 171543883                                                                                                | N-Term(iTRAQ4plex)                                  | 2154.10471 | 50 | 70  | 4.67 | Expt1 |
| FMQDPMEIFVDDTK      | 5  | 9790069                                                                                                  | N-Term(iTRAQ4plex), K15(iTRAQ4plex)                 | 2133.01543 | 50 | 63  | 4.04 | Expt1 |
| SSEPVLQTEAETEFVLR   | 5  | 8567340                                                                                                  | N-Term(iTRAQ4plex)                                  | 2129.05570 | 50 | 59  | 5.20 | Expt1 |
| GDPGEAGPQGDQGR      | 15 | 6753484                                                                                                  | N-Term(iTRAQ4plex)                                  | 1484.68767 | 50 | 68  | 3.86 | Expt1 |
| EQVGDQYQTVR         | 3  | 31982223                                                                                                 | N-Term(iTRAQ4plex)                                  | 1466.74004 | 50 | 59  | 3.72 | Expt1 |
| GCTFLVGLIQK         | 14 | 157951598                                                                                                | N-Term(iTRAQ4plex), C2(Methylthio), K11(iTRAQ4plex) | 1512.85625 | 50 | 58  | 3.86 | Expt1 |
| MIDLSGNPVLRL        | 3  | 21362277                                                                                                 | N-Term(iTRAQ4plex)                                  | 1358.75945 | 50 | 41  | 3.47 | Expt1 |
| GTTASQMAQALALDK     | 5  | 6678097;255759941                                                                                        | N-Term(iTRAQ4plex), K15(iTRAQ4plex)                 | 1793.97392 | 50 | 87  | 4.78 | Expt1 |
| NSNILEDLETLR        | 3  | 148747410                                                                                                | N-Term(iTRAQ4plex)                                  | 1560.83769 | 50 | 55  | 4.22 | Expt1 |
| QAGVFEPTIVK         | 3  | 110625624                                                                                                | N-Term(iTRAQ4plex), K11(iTRAQ4plex)                 | 1476.87163 | 50 | 57  | 4.63 | Expt1 |
| NHLVEIPPNLPSSSLVELR | 3  | 20137008                                                                                                 | N-Term(iTRAQ4plex)                                  | 2171.23532 | 50 | 35  | 4.80 | Expt1 |
| VAAVQPPEEGPSR       | 3  | 167234372                                                                                                | N-Term(iTRAQ4plex)                                  | 1480.78826 | 50 | 51  | 3.37 | Expt1 |
| FGVEQDVDMVFASFIR    | 6  | 31981562                                                                                                 | N-Term(iTRAQ4plex), M9(Oxidation)                   | 2020.00261 | 50 | 53  | 3.60 | Expt1 |
| EQYSQYSLVVR         | 5  | 169234958;32129201;3212920<br>5                                                                          | N-Term(iTRAQ4plex)                                  | 1515.79680 | 50 | 53  | 3.72 | Expt1 |
| IILLQSR             | 18 | 157041244;157041246;157041<br>248                                                                        | N-Term(iTRAQ4plex), Q5(Deamidated)                  | 987.63255  | 50 | 34  |      | Expt1 |
| LILIESR             | 18 | 149257465;82918395                                                                                       | N-Term(iTRAQ4plex)                                  | 987.63255  | 50 | 34  |      | Expt1 |
| GVIDMGNSLIER        | 5  | 115496850                                                                                                | N-Term(iTRAQ4plex)                                  | 1447.77190 | 50 | 76  | 3.24 | Expt1 |
| DVDETIGWIK          | 5  | 115496850                                                                                                | N-Term(iTRAQ4plex), K10(iTRAQ4plex)                 | 1463.79228 | 50 | 72  | 4.05 | Expt1 |
| AFFSNSLVELIR        | 9  | 167736365                                                                                                | N-Term(iTRAQ4plex)                                  | 1539.86882 | 50 | 70  | 3.99 | Expt1 |
| LVINGNGTVEDR        | 18 | 85540471;85540466;85540468                                                                               | N-Term(iTRAQ4plex), N4(Deamidated), N7(Deamidated)  | 1489.76396 | 50 | 63  | 3.51 | Expt1 |
| LDYDEDASAMLR        | 6  | 19526912                                                                                                 | N-Term(iTRAQ4plex)                                  | 1542.72417 | 50 | 59  | 3.66 | Expt1 |
| AVENLIQMAR          | 3  | 149246587                                                                                                | N-Term(iTRAQ4plex)                                  | 1451.78398 | 50 | 59  | 4.08 | Expt1 |
| ALTSDFEEQR          | 9  | 9937970;253795455;25379545<br>1                                                                          | N-Term(iTRAQ4plex)                                  | 1452.75127 | 50 | 55  | 4.05 | Expt1 |
| DVWDYVFFK           | 3  | 120537241                                                                                                | N-Term(iTRAQ4plex), K9(iTRAQ4plex)                  | 1506.79350 | 50 | 54  | 3.60 | Expt1 |
| FILNLPTFSVR         | 25 | 227116345                                                                                                | N-Term(iTRAQ4plex)                                  | 1450.85637 | 50 | 53  | 3.49 | Expt1 |
| EFVAVTGTEEDR        | 7  | 38198665                                                                                                 | N-Term(iTRAQ4plex)                                  | 1496.73882 | 50 | 49  | 3.58 | Expt1 |
| VLLSPDYLPAMR        | 5  | 146231996                                                                                                | N-Term(iTRAQ4plex)                                  | 1518.84990 | 50 | 49  | 3.27 | Expt1 |
| VVGAMQLYSVDR        | 3  | 51491845                                                                                                 | N-Term(iTRAQ4plex)                                  | 1481.79082 | 50 | 47  | 3.97 | Expt1 |

|                               |    |                                                          |                                                                      |            |    |    |      |       |
|-------------------------------|----|----------------------------------------------------------|----------------------------------------------------------------------|------------|----|----|------|-------|
| LQALQRVLQSR                   | 2  | 6755971                                                  | N-Term(iTRAQ4plex), Q5(Deamidated)                                   | 1456.85430 | 50 | 41 |      | Expt1 |
| TIYTPGSTVLYR                  | 6  | 126518317                                                | N-Term(iTRAQ4plex)                                                   | 1514.83562 | 50 | 39 | 2.98 | Expt1 |
| AWDDFFPGSDR                   | 3  | 14149750                                                 | N-Term(iTRAQ4plex)                                                   | 1456.66301 | 50 | 32 | 2.90 | Expt1 |
| IQIAPDSGGLPER                 | 4  | 84662730                                                 | N-Term(iTRAQ4plex)                                                   | 1496.82158 | 50 |    | 3.32 | Expt1 |
| LIHIPINNIIVGG                 | 1  | 149233906;149271761;83003871;158517832                   | N-Term(iTRAQ4plex)                                                   | 1516.93767 | 50 |    |      | Expt1 |
| LEDVLPFLAFTR                  | 8  | 171543869;171543871                                      | N-Term(iTRAQ4plex)                                                   | 1417.82060 | 50 | 45 | 3.52 | Expt1 |
| NNYATMRPDSTEIDQDTINR          | 2  | 22203747                                                 | N-Term(iTRAQ4plex), N1(Deamidated)                                   | 2499.15140 | 50 |    | 3.30 | Expt1 |
| DGQVIGIGAGQQSR                | 6  | 149234067                                                | N-Term(iTRAQ4plex)                                                   | 1529.81828 | 49 | 53 | 3.65 | Expt1 |
| NAVEEYVYEMR                   | 4  | 112293266                                                | N-Term(iTRAQ4plex)                                                   | 1546.73638 | 49 | 55 | 4.22 | Expt1 |
| YLECSALTQR                    | 11 | 18875380;45592934;6679601                                | N-Term(iTRAQ4plex), C4(Methylthio)                                   | 1373.67046 | 49 | 50 | 3.30 | Expt1 |
| EAVVQAEAAAEITR                | 11 | 126090932                                                | N-Term(iTRAQ4plex)                                                   | 1730.90764 | 49 | 78 | 4.29 | Expt1 |
| EFSAPSTPTGTLEFAGGDAK          | 9  | 61743961                                                 | N-Term(iTRAQ4plex), K20(iTRAQ4plex)                                  | 2271.14800 | 49 | 95 | 4.78 | Expt1 |
| IAATILTSPDLR                  | 7  | 6754036                                                  | N-Term(iTRAQ4plex)                                                   | 1414.84258 | 49 | 71 | 4.15 | Expt1 |
| TPDQIMELFDSITYSK              | 7  | 225637487                                                | N-Term(iTRAQ4plex), M6(Oxidation), K16(iTRAQ4plex)                   | 2192.10733 | 49 | 50 | 3.69 | Expt1 |
| FVSIIDLFPVK                   | 14 | 116089273                                                | N-Term(iTRAQ4plex), K11(iTRAQ4plex)                                  | 1539.90666 | 49 | 65 | 3.46 | Expt1 |
| DIPVNLPCIYR                   | 6  | 18252782                                                 | N-Term(iTRAQ4plex), C8(Methylthio)                                   | 1492.78337 | 49 | 46 | 3.66 | Expt1 |
| EELVEVIKDI                    | 2  | 7106387;94388526;94388799                                | N-Term(iTRAQ4plex), K8(iTRAQ4plex)                                   | 1504.84111 | 49 |    | 3.55 | Expt1 |
| ISMPEIDLNLK                   | 3  | 61743961                                                 | N-Term(iTRAQ4plex), M3(Oxidation), K11(iTRAQ4plex)                   | 1576.89482 | 49 | 66 |      | Expt1 |
| ILMLGLDAAGK                   | 3  | 6680724                                                  | N-Term(iTRAQ4plex), K11(iTRAQ4plex)                                  | 1389.84709 | 49 | 60 | 3.69 | Expt1 |
| GIDPFLDALAK                   | 6  | 6753324                                                  | N-Term(iTRAQ4plex), K12(iTRAQ4plex)                                  | 1534.87651 | 49 | 78 | 3.54 | Expt1 |
| SLDLFGCEVTNR                  | 6  | 18700032                                                 | N-Term(iTRAQ4plex), C7(Methylthio)                                   | 1543.73686 | 49 | 73 | 3.86 | Expt1 |
| NLDDLGLIAEVR                  | 7  | 133778953                                                | N-Term(iTRAQ4plex)                                                   | 1471.82622 | 49 | 54 | 4.04 | Expt1 |
| IECESAETTEDCIEK               | 6  | 20330802                                                 | N-Term(iTRAQ4plex), C3(Methylthio), C12(Methylthio), K15(iTRAQ4plex) | 2079.88456 | 49 | 53 | 4.42 | Expt1 |
| LLVVDPEETDER                  | 4  | 6755566                                                  | N-Term(iTRAQ4plex)                                                   | 1429.76555 | 49 | 47 | 3.25 | Expt1 |
| VLQPVEGEVAILFK                | 3  | 31791059                                                 | N-Term(iTRAQ4plex), K14(iTRAQ4plex)                                  | 1830.10379 | 49 | 52 | 4.77 | Expt1 |
| IACLDFSLQK                    | 4  | 110625624                                                | N-Term(iTRAQ4plex), C3(Methylthio), K10(iTRAQ4plex)                  | 1471.79094 | 49 | 71 | 3.40 | Expt1 |
| ETQSQLESER                    | 9  | 82950147;82950149;149264086                              | N-Term(iTRAQ4plex)                                                   | 1350.65874 | 49 | 57 | 3.67 | Expt1 |
| VLSIGDGIAR                    | 15 | 6680748                                                  | N-Term(iTRAQ4plex)                                                   | 1144.68266 | 49 | 46 | 3.37 | Expt1 |
| VPGLYVIDSIVR                  | 5  | 109150409;30527367                                       | N-Term(iTRAQ4plex)                                                   | 1474.87566 | 49 | 44 | 3.06 | Expt1 |
| GYGFLIK                       | 4  | 6755963                                                  | N-Term(iTRAQ4plex), K8(iTRAQ4plex)                                   | 1142.69036 | 49 | 37 | 3.33 | Expt1 |
| FAELAQIYAQR                   | 3  | 12963555                                                 | N-Term(iTRAQ4plex)                                                   | 1453.79827 | 49 | 49 | 3.82 | Expt1 |
| YDQVAVFGSDFQEK                | 13 | 6678483                                                  | N-Term(iTRAQ4plex), K15(iTRAQ4plex)                                  | 1977.98210 | 49 | 70 | 5.36 | Expt1 |
| DYLLCDYNR                     | 11 | 6753262;83649737                                         | N-Term(iTRAQ4plex), C5(Methylthio)                                   | 1364.60967 | 49 | 38 | 3.13 | Expt1 |
| EATSSLVLPVVDYIAQDTPAPSVR      | 2  | 161484644                                                | N-Term(iTRAQ4plex)                                                   | 2670.41800 | 49 |    | 3.09 | Expt1 |
| VCTLAIDPGDSDIIR               | 16 | 149263482;82890078;149251558;149260929;82952096;94408110 | N-Term(iTRAQ4plex), C2(Methylthio)                                   | 1890.98381 | 49 | 86 | 4.63 | Expt1 |
| GGGFGGGPGPGGLQSGQTIALPAQLIEFR | 6  | 6755252                                                  | N-Term(iTRAQ4plex)                                                   | 2997.57090 | 49 | 95 | 5.61 | Expt1 |
| LEICNLTPDTLTCDYSYK            | 3  | 157951598                                                | N-Term(iTRAQ4plex), C4(Methylthio), C13(Methylthio), K17(iTRAQ4plex) | 2309.08188 | 49 | 84 | 4.53 | Expt1 |
| IAQDLEMYGINYFEIK              | 4  | 149266483                                                | N-Term(iTRAQ4plex), M7(Oxidation), K16(iTRAQ4plex)                   | 2251.16690 | 49 | 74 | 4.47 | Expt1 |
| DFAPGSOLLPLYDGDVK             | 6  | 27229085                                                 | N-Term(iTRAQ4plex), K18(iTRAQ4plex)                                  | 2236.21709 | 49 | 74 | 4.15 | Expt1 |
| EAQPQSQVSYQGLPQVK             | 3  | 46249419;46249421                                        | N-Term(iTRAQ4plex), K18(iTRAQ4plex)                                  | 2232.18473 | 49 | 60 | 4.12 | Expt1 |
| INQDPQVMLAPLISIALK            | 3  | 227330633                                                | N-Term(iTRAQ4plex), M8(Oxidation), K18(iTRAQ4plex)                   | 2268.32700 | 49 | 56 | 4.02 | Expt1 |
| SSSTAYMELR                    | 5  | 83008262;94409542;149274201;149274205;94410061           | N-Term(iTRAQ4plex)                                                   | 1288.63347 | 49 | 40 | 4.03 | Expt1 |
| DLAVAGPEMQVK                  | 5  | 239052674                                                | N-Term(iTRAQ4plex), K12(iTRAQ4plex)                                  | 1545.86382 | 49 | 77 | 4.27 | Expt1 |
| VTLAAPPYFR                    | 2  | 21704174                                                 | N-Term(iTRAQ4plex)                                                   | 1452.79863 | 49 |    | 3.91 | Expt1 |
| TDDIPVVDQEFK                  | 1  | 158854016                                                | N-Term(iTRAQ4plex), K13(iTRAQ4plex)                                  | 1893.98325 | 49 |    |      | Expt1 |
| GQVGGDNNVEMDAAPGVDLR          | 15 | 154090941;21489935                                       | N-Term(iTRAQ4plex), M11(Oxidation)                                   | 2246.08745 | 49 | 96 | 5.16 | Expt1 |
| FDDGAGGDNEVQR                 | 3  | 33859604                                                 | N-Term(iTRAQ4plex)                                                   | 1523.68645 | 49 | 63 | 4.21 | Expt1 |
| VQSLQATFGTFESLLR              | 7  | 62526118                                                 | N-Term(iTRAQ4plex)                                                   | 1941.05912 | 49 | 61 | 5.83 | Expt1 |
| VTAVIPCFFPYAR                 | 7  | 10946854;30794182;13386146;256418956                     | N-Term(iTRAQ4plex), C7(Methylthio)                                   | 1526.80058 | 49 | 49 | 3.55 | Expt1 |
| VINEPTAAALAYGLDK              | 4  | 162461907                                                | N-Term(iTRAQ4plex), K16(iTRAQ4plex)                                  | 1934.08573 | 49 | 47 | 4.46 | Expt1 |

|                       |    |                     |                                                                    |            |    |     |      |       |
|-----------------------|----|---------------------|--------------------------------------------------------------------|------------|----|-----|------|-------|
| MFDMGFEPQVMR          | 2  | 149264152;160420299 | N-Term(iTRAQ4plex)                                                 | 1631.75456 | 49 |     | 3.22 | Expt1 |
| LYSESLAR              | 3  | 116089273;33859560  | N-Term(iTRAQ4plex)                                                 | 1082.59697 | 49 | 39  | 2.97 | Expt1 |
| SVPADIFQMQATTR        | 30 | 6753824             | N-Term(iTRAQ4plex), M9(Oxidation)                                  | 1724.87724 | 49 | 66  | 4.85 | Expt1 |
| LNLAIFVANLFNK         | 3  | 21704120;262050551  | N-Term(iTRAQ4plex), K12(iTRAQ4plex)                                | 1651.98685 | 49 | 51  | 3.96 | Expt1 |
| IVEIPFNSTNK           | 3  | 21450277            | N-Term(iTRAQ4plex), K11(iTRAQ4plex)                                | 1549.88713 | 49 | 60  | 3.73 | Expt1 |
| EAALNNEEVGADLEQVEVLQK | 9  | 115496850           | N-Term(iTRAQ4plex), K21(iTRAQ4plex)                                | 2573.35649 | 49 | 92  | 4.89 | Expt1 |
| FSMVIDNGIVK           | 16 | 6755114             | N-Term(iTRAQ4plex), M3(Oxidation), N7(Deamidated), K11(iTRAQ4plex) | 1527.83660 | 49 | 78  | 4.02 | Expt1 |
| ATEVPLSWESFNK         | 5  | 226246550;226246552 | N-Term(iTRAQ4plex), K13(iTRAQ4plex)                                | 1795.95183 | 49 | 61  | 3.48 | Expt1 |
| NSIAYLDEETGSLNK       | 4  | 111120329           | N-Term(iTRAQ4plex), K15(iTRAQ4plex)                                | 1942.00908 | 49 | 73  | 4.20 | Expt1 |
| TSAAPGGVPLQPDDLEFTK   | 4  | 22267442            | N-Term(iTRAQ4plex), K19(iTRAQ4plex)                                | 2244.21659 | 49 | 39  | 4.53 | Expt1 |
| VQELQQQSAR            | 4  | 29336026            | N-Term(iTRAQ4plex)                                                 | 1330.72209 | 49 | 56  | 3.61 | Expt1 |
| LGELPSWIMMR           | 5  | 10181184            | N-Term(iTRAQ4plex)                                                 | 1476.78594 | 49 | 50  | 3.42 | Expt1 |
| VSLPDVLDLTK           | 11 | 61743961            | N-Term(iTRAQ4plex), K11(iTRAQ4plex)                                | 1501.87786 | 49 | 104 | 3.86 | Expt1 |
| LAGPOLVQMFIGDGAK      | 4  | 228008337           | N-Term(iTRAQ4plex), K16(iTRAQ4plex)                                | 1933.08908 | 49 | 43  | 3.49 | Expt1 |
| IYQAASPDEGALVR        | 3  | 84781802;7106257    | N-Term(iTRAQ4plex)                                                 | 1746.95476 | 49 | 54  | 4.21 | Expt1 |
| LS DAGLPSR            | 71 | 6680554             | N-Term(iTRAQ4plex)                                                 | 1059.59197 | 49 | 49  | 3.61 | Expt1 |
| IATDGIAR              | 3  | 94379918;58082069   | N-Term(iTRAQ4plex)                                                 | 1089.60515 | 49 | 36  | 3.13 | Expt1 |
| AMADPEVQIMSDPAMR      | 7  | 14389431            | N-Term(iTRAQ4plex)                                                 | 2033.96013 | 49 | 69  | 4.17 | Expt1 |
| TLLGSSDNVATVSNIEK     | 14 | 225690566           | N-Term(iTRAQ4plex), K17(iTRAQ4plex)                                | 2036.11223 | 49 | 102 | 5.06 | Expt1 |
| FAYNQLIK              | 26 | 22203747            | N-Term(iTRAQ4plex), K8(iTRAQ4plex)                                 | 1284.75469 | 49 | 52  | 3.68 | Expt1 |
| FLTTTPNSLLVSWQAPR     | 5  | 46849812            | N-Term(iTRAQ4plex)                                                 | 2075.14505 | 49 | 64  | 4.47 | Expt1 |
| LDLDTSDSQPPVFK        | 11 | 170295840           | N-Term(iTRAQ4plex), K15(iTRAQ4plex)                                | 1963.06853 | 49 | 62  | 4.18 | Expt1 |
| GALQYLVPILTQTTLTK     | 8  | 88014720            | N-Term(iTRAQ4plex), K16(iTRAQ4plex)                                | 2047.24370 | 49 | 60  | 4.52 | Expt1 |
| QLICDPSYVK            | 7  | 116089273           | N-Term(iTRAQ4plex), C4(Methylthio), K10(iTRAQ4plex)                | 1499.78667 | 49 | 71  | 4.02 | Expt1 |
| DSNVCVGFR             | 36 | 148277039           | N-Term(iTRAQ4plex), C5(Methylthio)                                 | 1250.54155 | 49 | 38  | 3.70 | Expt1 |
| ESLVVNYEDLAAR         | 3  | 172088119           | N-Term(iTRAQ4plex)                                                 | 1622.85417 | 49 | 94  | 4.32 | Expt1 |
| GAEADQIIEYLK          | 5  | 126012517           | N-Term(iTRAQ4plex), K12(iTRAQ4plex)                                | 1637.90727 | 49 | 79  | 3.67 | Expt1 |
| EGVVECSFVQSK          | 8  | 31982186            | N-Term(iTRAQ4plex), C6(Methylthio), K12(iTRAQ4plex)                | 1645.81218 | 49 | 77  | 4.07 | Expt1 |
| ALLQGSNEIELR          | 12 | 34328108            | N-Term(iTRAQ4plex)                                                 | 1599.92351 | 49 | 76  | 3.91 | Expt1 |
| LQALSPELLAPVPR        | 9  | 16418335            | N-Term(iTRAQ4plex)                                                 | 1647.99419 | 49 | 65  | 3.77 | Expt1 |
| TSAPITCELLNK          | 3  | 134288917           | N-Term(iTRAQ4plex), C7(Methylthio), K12(iTRAQ4plex)                | 1623.86846 | 49 | 65  | 4.12 | Expt1 |
| GSFSEQINEFLR          | 10 | 149262992;58037267  | N-Term(iTRAQ4plex)                                                 | 1627.82256 | 49 | 63  | 4.43 | Expt1 |
| SGVLDEPTIATILR        | 11 | 110626165           | N-Term(iTRAQ4plex)                                                 | 1628.93913 | 49 | 62  | 3.61 | Expt1 |
| MMADEALDSGLVSR        | 3  | 7949037             | N-Term(iTRAQ4plex)                                                 | 1638.79985 | 49 | 61  | 3.85 | Expt1 |
| DVEETGITVASVER        | 3  | 34368584            | N-Term(iTRAQ4plex)                                                 | 1648.85283 | 49 | 60  | 3.28 | Expt1 |
| ALDVLVFGPPLLTR        | 10 | 149257881           | N-Term(iTRAQ4plex)                                                 | 1656.98491 | 49 | 55  | 3.51 | Expt1 |
| DSPLLLQISAMR          | 3  | 118601017           | N-Term(iTRAQ4plex)                                                 | 1615.90044 | 49 | 52  | 3.27 | Expt1 |
| QPDVEVDGFSELK         | 3  | 20806109            | N-Term(iTRAQ4plex)                                                 | 1634.81597 | 49 | 37  | 3.03 | Expt1 |
| EQLSAGIIEELR          | 6  | 21703702            | N-Term(iTRAQ4plex)                                                 | 1629.89372 | 49 |     | 3.64 | Expt1 |
| AMGAAQVVVTDLSASR      | 5  | 22128627            | N-Term(iTRAQ4plex)                                                 | 1719.92058 | 49 | 84  | 4.42 | Expt1 |
| VIDIDVPDNNVEGPDMDK    | 5  | 61743961            | N-Term(iTRAQ4plex), M15(Oxidation), K16(iTRAQ4plex)                | 2046.04044 | 49 | 44  | 4.77 | Expt1 |
| GVLADGTTR             | 9  | 31560625            | N-Term(iTRAQ4plex)                                                 | 1033.57610 | 49 | 48  | 3.23 | Expt1 |
| DLEASIR               | 2  | 134288917           | N-Term(iTRAQ4plex)                                                 | 1018.56841 | 49 |     | 3.01 | Expt1 |
| AYAEFYR               | 4  | 149263103;16716343  | N-Term(iTRAQ4plex)                                                 | 1063.53288 | 49 |     | 2.89 | Expt1 |
| IPWFQYPIIYDIR         | 3  | 126723336           | N-Term(iTRAQ4plex)                                                 | 1868.02825 | 49 | 47  | 3.44 | Expt1 |
| VQGGALEESQLVAGVAFK    | 4  | 238814391           | N-Term(iTRAQ4plex), K18(iTRAQ4plex)                                | 2091.17685 | 49 | 66  | 4.70 | Expt1 |
| NVDMLESELQYDEPIIK     | 3  | 6679012             | N-Term(iTRAQ4plex), K18(iTRAQ4plex)                                | 2423.26902 | 49 | 53  | 5.34 | Expt1 |
| NADMSDMQQAADCATQAMEK  | 5  | 18087731;281182473  | N-Term(iTRAQ4plex), C15(Methylthio), K22(iTRAQ4plex)               | 2765.15531 | 49 | 87  | 5.89 | Expt1 |
| NDQCYDDIR             | 15 | 94394941;31542413   | N-Term(iTRAQ4plex), C4(Methylthio)                                 | 1331.54778 | 49 | 45  | 3.49 | Expt1 |

|                               |    |                                                                                                                                                                                                                                                                                                           |                                                      |            |    |     |  |      |       |
|-------------------------------|----|-----------------------------------------------------------------------------------------------------------------------------------------------------------------------------------------------------------------------------------------------------------------------------------------------------------|------------------------------------------------------|------------|----|-----|--|------|-------|
| VGVNGFGR                      | 7  | 149248895;149249272;149249564;149249566;149250207;149251040;149251140;149251223;149251463;149251509;149251911;149252413;149257623;149258770;149258934;149259154;149259607;149259652;149259964;149260709;149260711;94387946;149260748;149263021;149265154;149266302;149266427;82996390;149272161;149274387 | N-Term(iTRAQ4plex), N4(Deamidated)                   | 950.51854  | 49 | 44  |  | 3.03 | Expt1 |
| ELFQETLESLR                   | 5  | 29336026                                                                                                                                                                                                                                                                                                  | N-Term(iTRAQ4plex)                                   | 1508.81291 | 49 | 38  |  | 4.27 | Expt1 |
| EPELFQTVAEGLR                 | 4  | 7106303                                                                                                                                                                                                                                                                                                   | N-Term(iTRAQ4plex)                                   | 1632.87444 | 49 | 70  |  | 3.08 | Expt1 |
| GLVVDMMNGFEEER                | 3  | 34610207                                                                                                                                                                                                                                                                                                  | N-Term(iTRAQ4plex), N7(Deamidated)                   | 1639.77580 | 49 | 46  |  | 3.79 | Expt1 |
| DDDDLNR                       | 7  | 22203747                                                                                                                                                                                                                                                                                                  | N-Term(iTRAQ4plex)                                   | 1059.51970 | 49 | 37  |  | 3.06 | Expt1 |
| SGVAYIVAPSGSTADK              | 3  | 149234067                                                                                                                                                                                                                                                                                                 | N-Term(iTRAQ4plex), K16(iTRAQ4plex)                  | 1810.98418 | 49 | 75  |  | 4.09 | Expt1 |
| TAEDGPDLEMLSGQER              | 3  | 161484656;161484658                                                                                                                                                                                                                                                                                       | N-Term(iTRAQ4plex)                                   | 1891.87944 | 49 | 59  |  | 3.62 | Expt1 |
| MQELQEAQNR                    | 3  | 160333863                                                                                                                                                                                                                                                                                                 | N-Term(iTRAQ4plex)                                   | 1461.72502 | 49 | 54  |  | 4.05 | Expt1 |
| VAWGLVPGASGFR                 | 6  | 115647999                                                                                                                                                                                                                                                                                                 | N-Term(iTRAQ4plex)                                   | 1460.81304 | 49 | 47  |  | 3.94 | Expt1 |
| NLVWNAGALHYSDEVEIIR           | 4  | 6753484                                                                                                                                                                                                                                                                                                   | N-Term(iTRAQ4plex)                                   | 2343.23325 | 49 | 44  |  | 4.73 | Expt1 |
| TSSAEMPTPLGSAVEAIR            | 3  | 70608131                                                                                                                                                                                                                                                                                                  | N-Term(iTRAQ4plex)                                   | 2074.09453 | 49 | 63  |  | 4.60 | Expt1 |
| SDFQVNLNNSR                   | 5  | 146219835;146219830;146219849;146231979                                                                                                                                                                                                                                                                   | N-Term(iTRAQ4plex)                                   | 1508.75896 | 49 | 72  |  | 3.81 | Expt1 |
| TMQNTSDLTAR                   | 3  | 28395018                                                                                                                                                                                                                                                                                                  | N-Term(iTRAQ4plex), M2(Oxidation)                    | 1512.71111 | 49 | 58  |  | 3.74 | Expt1 |
| LNGTDPEDVIR                   | 14 | 21728376;71037403;198278553                                                                                                                                                                                                                                                                               | N-Term(iTRAQ4plex)                                   | 1372.71819 | 49 | 51  |  | 3.85 | Expt1 |
| ALMLQGVLLADAVAVTMGPK          | 3  | 149270048;183396771                                                                                                                                                                                                                                                                                       | N-Term(iTRAQ4plex), K21(iTRAQ4plex)                  | 2401.35367 | 49 | 64  |  | 4.25 | Expt1 |
| DLDDFQSWLSR                   | 5  | 117938332;117938334                                                                                                                                                                                                                                                                                       | N-Term(iTRAQ4plex)                                   | 1525.74614 | 48 | 59  |  | 3.04 | Expt1 |
| DIVQFVYR                      | 4  | 25141330                                                                                                                                                                                                                                                                                                  | N-Term(iTRAQ4plex)                                   | 1280.71330 | 48 |     |  | 3.36 | Expt1 |
| GCPAALPLSNLYETMGVVGSTTTQLYTDR | 5  | 6678321                                                                                                                                                                                                                                                                                                   | N-Term(iTRAQ4plex), C2(Methylthio), M15(Oxidation)   | 3264.57529 | 48 | 103 |  | 5.17 | Expt1 |
| DMETIGFAVYQVPR                | 7  | 160333229                                                                                                                                                                                                                                                                                                 | N-Term(iTRAQ4plex)                                   | 1769.90532 | 48 | 78  |  | 4.56 | Expt1 |
| ATISDEEIER                    | 5  | 30794432                                                                                                                                                                                                                                                                                                  | N-Term(iTRAQ4plex)                                   | 1306.66423 | 48 | 46  |  | 4.26 | Expt1 |
| VIVDALDER                     | 6  | 160333881                                                                                                                                                                                                                                                                                                 | N-Term(iTRAQ4plex)                                   | 1173.66106 | 48 | 43  |  | 3.34 | Expt1 |
| AMGSQVLVDCSTLTSK              | 9  | 31560359                                                                                                                                                                                                                                                                                                  | N-Term(iTRAQ4plex), C10(Methylthio), K16(iTRAQ4plex) | 1973.99663 | 48 | 84  |  | 4.50 | Expt1 |
| LEDILESINSIK                  | 5  | 149254318                                                                                                                                                                                                                                                                                                 | N-Term(iTRAQ4plex), K12(iTRAQ4plex)                  | 1661.96428 | 48 | 85  |  | 3.85 | Expt1 |
| SLGETQLALSSDLK                | 5  | 62526118                                                                                                                                                                                                                                                                                                  | N-Term(iTRAQ4plex), K14(iTRAQ4plex)                  | 1749.99297 | 48 | 74  |  | 3.86 | Expt1 |
| EEIFGPMQILK                   | 10 | 6753036                                                                                                                                                                                                                                                                                                   | N-Term(iTRAQ4plex), K12(iTRAQ4plex)                  | 1691.97161 | 48 | 74  |  | 3.49 | Expt1 |
| LEAPCQQWMLR                   | 14 | 110626070                                                                                                                                                                                                                                                                                                 | N-Term(iTRAQ4plex), C5(Methylthio)                   | 1693.80107 | 48 | 61  |  | 3.96 | Expt1 |
| TIGISVDPR                     | 6  | 149251177;149252074;94397192                                                                                                                                                                                                                                                                              | N-Term(iTRAQ4plex)                                   | 1101.63957 | 48 | 57  |  | 2.90 | Expt1 |
| EMEALEDER                     | 8  | 114326446                                                                                                                                                                                                                                                                                                 | N-Term(iTRAQ4plex), M2(Oxidation)                    | 1410.61943 | 48 | 46  |  | 3.06 | Expt1 |
| VPPPPPIAR                     | 9  | 8393544                                                                                                                                                                                                                                                                                                   | N-Term(iTRAQ4plex)                                   | 1087.67436 | 48 | 38  |  |      | Expt1 |
| TCVDIDECATGR                  | 9  | 73088940;71067128                                                                                                                                                                                                                                                                                         | N-Term(iTRAQ4plex), C2(Methylthio), C8(Methylthio)   | 1518.62065 | 48 | 50  |  | 3.33 | Expt1 |
| FIEDELQIPVK                   | 4  | 31560737                                                                                                                                                                                                                                                                                                  | N-Term(iTRAQ4plex), K11(iTRAQ4plex)                  | 1618.93279 | 48 | 64  |  | 3.92 | Expt1 |
| FVDEEDGGDGQAGPDEGEVDSCLR      | 7  | 224809382                                                                                                                                                                                                                                                                                                 | N-Term(iTRAQ4plex), C22(Methylthio)                  | 2686.10776 | 48 | 91  |  | 5.08 | Expt1 |
| EFGSLPTTPSEQR                 | 3  | 31560462                                                                                                                                                                                                                                                                                                  | N-Term(iTRAQ4plex)                                   | 1592.80425 | 48 | 59  |  | 3.81 | Expt1 |
| SGLFSSNEWR                    | 5  | 160333881                                                                                                                                                                                                                                                                                                 | N-Term(iTRAQ4plex)                                   | 1326.65642 | 48 | 38  |  | 3.70 | Expt1 |
| DLEDSLAR                      | 6  | 9506843;162287370;161760667                                                                                                                                                                                                                                                                               | N-Term(iTRAQ4plex)                                   | 1062.55632 | 48 | 46  |  | 2.83 | Expt1 |
| VAIEPGVPR                     | 5  | 22128627                                                                                                                                                                                                                                                                                                  | N-Term(iTRAQ4plex)                                   | 1081.64629 | 48 | 44  |  |      | Expt1 |
| QAEAMALLAEAR                  | 3  | 13385392                                                                                                                                                                                                                                                                                                  | N-Term(iTRAQ4plex)                                   | 1546.79961 | 48 | 47  |  | 4.45 | Expt1 |
| AQLFALTGVQPAR                 | 6  | 84452155;31560313                                                                                                                                                                                                                                                                                         | N-Term(iTRAQ4plex)                                   | 1515.87822 | 48 | 47  |  | 4.59 | Expt1 |
| DLEAITFK                      | 5  | 160333229                                                                                                                                                                                                                                                                                                 | N-Term(iTRAQ4plex), K8(iTRAQ4plex)                   | 1224.70207 | 48 | 49  |  | 3.52 | Expt1 |
| AQIQANQPSIDVYYNK              | 7  | 16716499                                                                                                                                                                                                                                                                                                  | N-Term(iTRAQ4plex), K17(iTRAQ4plex)                  | 2239.20188 | 48 | 57  |  | 4.31 | Expt1 |
| ALVILAK                       | 8  | 55741460                                                                                                                                                                                                                                                                                                  | N-Term(iTRAQ4plex), K7(iTRAQ4plex)                   | 1015.72191 | 48 | 55  |  | 3.02 | Expt1 |
| TLSDLVEYLLIDSGAQYK            | 3  | 42476274                                                                                                                                                                                                                                                                                                  | N-Term(iTRAQ4plex), K17(iTRAQ4plex)                  | 2203.18064 | 48 | 38  |  | 3.97 | Expt1 |
| GDSVIVLRL                     | 8  | 58037145;63501063;82889713                                                                                                                                                                                                                                                                                | N-Term(iTRAQ4plex)                                   | 1101.67754 | 48 | 54  |  | 3.26 | Expt1 |

|                            |    |                                                                                                                                                                                                                                                                                                                                                                                                                                                       |                                                                      |            |    |     |      |       |
|----------------------------|----|-------------------------------------------------------------------------------------------------------------------------------------------------------------------------------------------------------------------------------------------------------------------------------------------------------------------------------------------------------------------------------------------------------------------------------------------------------|----------------------------------------------------------------------|------------|----|-----|------|-------|
| LFYAPTSGGPEELVIPGNTNYAILR  | 8  | 111074529                                                                                                                                                                                                                                                                                                                                                                                                                                             | N-Term(iTRAQ4plex), Y22(iTRAQ4plex)                                  | 3077.66640 | 48 | 40  | 5.40 | Expt1 |
| DVVLAYPEVR                 | 10 | 150456419                                                                                                                                                                                                                                                                                                                                                                                                                                             | N-Term(iTRAQ4plex)                                                   | 1304.73516 | 48 | 54  | 3.91 | Expt1 |
| AASGFNATEDAQTLR            | 9  | 161016799                                                                                                                                                                                                                                                                                                                                                                                                                                             | N-Term(iTRAQ4plex)                                                   | 1695.84905 | 48 | 104 | 4.85 | Expt1 |
| AQDTAELFFEDVR              | 11 | 31982520                                                                                                                                                                                                                                                                                                                                                                                                                                              | N-Term(iTRAQ4plex)                                                   | 1684.83403 | 48 | 80  | 3.87 | Expt1 |
| DVSELTGFPEMLGGR            | 7  | 149234067                                                                                                                                                                                                                                                                                                                                                                                                                                             | N-Term(iTRAQ4plex)                                                   | 1751.88506 | 48 | 77  | 3.73 | Expt1 |
| WSTLVEDYGVELR              | 7  | 13385384                                                                                                                                                                                                                                                                                                                                                                                                                                              | N-Term(iTRAQ4plex)                                                   | 1710.89031 | 48 | 75  | 3.10 | Expt1 |
| AFLEENQLDYIIR              | 7  | 199559777                                                                                                                                                                                                                                                                                                                                                                                                                                             | N-Term(iTRAQ4plex)                                                   | 1767.94548 | 48 | 74  | 4.33 | Expt1 |
| WDDSGNDIIVLAK              | 8  | 157951729;157951727;6753294                                                                                                                                                                                                                                                                                                                                                                                                                           | N-Term(iTRAQ4plex), K13(iTRAQ4plex)                                  | 1733.94536 | 48 | 70  | 4.79 | Expt1 |
| LPIGDVATQYFADR             | 12 | 238814391                                                                                                                                                                                                                                                                                                                                                                                                                                             | N-Term(iTRAQ4plex)                                                   | 1709.90495 | 48 | 65  | 3.27 | Expt1 |
| VLLSSPGLLEEFYR             | 6  | 226958577                                                                                                                                                                                                                                                                                                                                                                                                                                             | N-Term(iTRAQ4plex)                                                   | 1766.98308 | 48 | 63  | 2.95 | Expt1 |
| WILENDPTELDLR              | 10 | 56699423                                                                                                                                                                                                                                                                                                                                                                                                                                              | N-Term(iTRAQ4plex)                                                   | 1757.92107 | 48 | 63  | 3.73 | Expt1 |
| VFANAPDSACVIGLR            | 5  | 31560653                                                                                                                                                                                                                                                                                                                                                                                                                                              | N-Term(iTRAQ4plex), C10(Methylthio)                                  | 1722.88030 | 48 | 58  | 3.45 | Expt1 |
| ETGEAVDLGAAGAGDR           | 3  | 27734136                                                                                                                                                                                                                                                                                                                                                                                                                                              | N-Term(iTRAQ4plex)                                                   | 1632.79643 | 48 | 56  | 4.23 | Expt1 |
| VALVYQMMNEPPGAR            | 6  | 31980648                                                                                                                                                                                                                                                                                                                                                                                                                                              | N-Term(iTRAQ4plex), M8(Oxidation)                                    | 1761.90972 | 48 | 52  | 3.76 | Expt1 |
| QGLLQPENPLLLK              | 3  | 6681115                                                                                                                                                                                                                                                                                                                                                                                                                                               | N-Term(iTRAQ4plex), K13(iTRAQ4plex)                                  | 1751.06906 | 48 | 42  | 4.00 | Expt1 |
| WEVYPGAPGFR                | 3  | 115647999                                                                                                                                                                                                                                                                                                                                                                                                                                             | N-Term(iTRAQ4plex)                                                   | 1356.71672 | 48 | 38  | 2.98 | Expt1 |
| ASQASQEY                   | 8  | 7106331                                                                                                                                                                                                                                                                                                                                                                                                                                               | N-Term(iTRAQ4plex)                                                   | 1027.48235 | 48 | 50  |      | Expt1 |
| SALPAQSAATLPAR             | 3  | 117938332                                                                                                                                                                                                                                                                                                                                                                                                                                             | N-Term(iTRAQ4plex)                                                   | 1497.85161 | 48 | 72  | 3.64 | Expt1 |
| VVDLMAYMASKE               | 4  | 149248895;149249564;149249566;149251040;149251044;149251140;149251223;149251463;149251509;149251903;149251905;149251911;149251964;149251966;149252413;149253819;149253823;149257623;149258744;149258770;149258772;149258934;149258938;149259607;149259652;149259964;149260709;149260711;94387946;149260748;149263021;149265154;149265922;149266302;149266427;149266431;149268472;149268967;149270469;149270673;149272161;94408118;149273204;149275059 | N-Term(iTRAQ4plex), K11(iTRAQ4plex)                                  | 1644.86797 | 48 | 68  | 3.85 | Expt1 |
| LFGTSPAEEVTPSPPEPAPALEAPAR | 5  | 112181302                                                                                                                                                                                                                                                                                                                                                                                                                                             | N-Term(iTRAQ4plex)                                                   | 2717.43802 | 48 | 62  | 4.51 | Expt1 |
| TAGWNIPMGMLYNR             | 9  | 20330802                                                                                                                                                                                                                                                                                                                                                                                                                                              | N-Term(iTRAQ4plex)                                                   | 1767.88396 | 48 | 55  | 4.28 | Expt1 |
| ATLYVTAIEDR                | 6  | 9790109                                                                                                                                                                                                                                                                                                                                                                                                                                               | N-Term(iTRAQ4plex)                                                   | 1395.76079 | 48 | 51  | 4.09 | Expt1 |
| LMVALAK                    | 11 | 149260099;6996913                                                                                                                                                                                                                                                                                                                                                                                                                                     | N-Term(iTRAQ4plex), K7(iTRAQ4plex)                                   | 1033.67717 | 48 | 56  | 2.90 | Expt1 |
| YVIEFIAR                   | 7  | 12963497;156231023;156231021                                                                                                                                                                                                                                                                                                                                                                                                                          | N-Term(iTRAQ4plex)                                                   | 1154.67229 | 48 | 40  | 3.04 | Expt1 |
| ISGDEVLAEK                 | 3  | 40254600                                                                                                                                                                                                                                                                                                                                                                                                                                              | N-Term(iTRAQ4plex), K11(iTRAQ4plex)                                  | 1461.84075 | 48 | 67  | 4.16 | Expt1 |
| GDMMCVNQGGYLCIPR           | 13 | 6753824                                                                                                                                                                                                                                                                                                                                                                                                                                               | N-Term(iTRAQ4plex), C5(Methylthio), N9(Deamidated), C14(Methylthio)  | 2107.86919 | 48 | 85  | 4.98 | Expt1 |
| AVPTDEAR                   | 1  | 31980840;6679583                                                                                                                                                                                                                                                                                                                                                                                                                                      | N-Term(iTRAQ4plex)                                                   | 1002.54564 | 48 |     |      | Expt1 |
| VDIDVPDLDIEGPEGK           | 11 | 61743961                                                                                                                                                                                                                                                                                                                                                                                                                                              | N-Term(iTRAQ4plex), K16(iTRAQ4plex)                                  | 1999.05315 | 48 | 83  | 4.03 | Expt1 |
| DIDECDIVDACK               | 10 | 164607147                                                                                                                                                                                                                                                                                                                                                                                                                                             | N-Term(iTRAQ4plex), C5(Methylthio), C12(Methylthio), K13(iTRAQ4plex) | 1815.79253 | 48 | 76  | 3.79 | Expt1 |
| SFEISPNR                   | 32 | 111074529                                                                                                                                                                                                                                                                                                                                                                                                                                             | N-Term(iTRAQ4plex)                                                   | 1093.57776 | 48 | 50  | 3.62 | Expt1 |
| TAMNVNDLFLAIK              | 7  | 28916687;149249575                                                                                                                                                                                                                                                                                                                                                                                                                                    | N-Term(iTRAQ4plex), K14(iTRAQ4plex)                                  | 1809.02140 | 48 | 47  | 3.40 | Expt1 |
| MLSCAGADR                  | 3  | 149249582;149259021;242397462                                                                                                                                                                                                                                                                                                                                                                                                                         | N-Term(iTRAQ4plex), C4(Methylthio)                                   | 1113.49516 | 48 | 54  | 3.29 | Expt1 |
| MLSCAGANR                  | 3  | 82931053                                                                                                                                                                                                                                                                                                                                                                                                                                              | N-Term(iTRAQ4plex), C4(Methylthio), N8(Deamidated)                   | 1113.49516 | 48 | 54  | 3.29 | Expt1 |
| DFEQPLAISR                 | 15 | 158635992                                                                                                                                                                                                                                                                                                                                                                                                                                             | N-Term(iTRAQ4plex)                                                   | 1319.70879 | 48 | 63  | 3.85 | Expt1 |
| ELEDGLER                   | 6  | 6753762                                                                                                                                                                                                                                                                                                                                                                                                                                               | N-Term(iTRAQ4plex)                                                   | 1161.58611 | 48 | 54  | 3.77 | Expt1 |
| VAPPLTQIPQIK               | 4  | 6753138                                                                                                                                                                                                                                                                                                                                                                                                                                               | N-Term(iTRAQ4plex), K14(iTRAQ4plex)                                  | 1778.08225 | 48 |     | 3.18 | Expt1 |
| EGIDPAPYYWYTDQR            | 4  | 219276601;219275596                                                                                                                                                                                                                                                                                                                                                                                                                                   | N-Term(iTRAQ4plex)                                                   | 2017.94304 | 48 | 53  | 3.53 | Expt1 |
| GDLPFVVTR                  | 5  | 114326446                                                                                                                                                                                                                                                                                                                                                                                                                                             | N-Term(iTRAQ4plex)                                                   | 1147.66106 | 48 | 49  | 3.01 | Expt1 |



|                                             |    |                                                                   |                                                                    |            |    |     |      |       |
|---------------------------------------------|----|-------------------------------------------------------------------|--------------------------------------------------------------------|------------|----|-----|------|-------|
| TLEDILFR                                    | 10 | 19527078                                                          | N-Term(iTRAQ4plex)                                                 | 1150.65984 | 48 | 45  | 3.22 | Expt1 |
| AGLVELLLR                                   | 3  | 149259328;6678059                                                 | N-Term(iTRAQ4plex)                                                 | 1127.73186 | 48 | 43  | 3.50 | Expt1 |
| DNLEWLAR                                    | 7  | 74315975                                                          | N-Term(iTRAQ4plex)                                                 | 1160.62041 | 48 | 42  | 3.26 | Expt1 |
| LTDCCVMMR                                   | 4  | 149274531;32880197;109134362                                      | N-Term(iTRAQ4plex), C4(Methylthio)                                 | 1126.55388 | 48 | 37  | 3.02 | Expt1 |
| FDMELDDLK                                   | 3  | 6754632                                                           | N-Term(iTRAQ4plex), K10(iTRAQ4plex)                                | 1510.76750 | 48 | 57  | 3.88 | Expt1 |
| DANGNSFATR                                  | 5  | 6677805                                                           | N-Term(iTRAQ4plex), N3(Deamidated)                                 | 1197.56426 | 48 | 49  | 3.60 | Expt1 |
| GAETTLALPMASDLELYDVTENSMR                   | 5  | 226423922                                                         | N-Term(iTRAQ4plex)                                                 | 2871.39695 | 48 | 74  | 4.60 | Expt1 |
| TVPIEAVTSK                                  | 3  | 75677414                                                          | N-Term(iTRAQ4plex), K10(iTRAQ4plex)                                | 1332.80913 | 48 | 73  | 3.43 | Expt1 |
| ILEVVNQVQDEER                               | 3  | 160333729                                                         | N-Term(iTRAQ4plex)                                                 | 1714.91191 | 48 | 67  | 3.51 | Expt1 |
| DAQPQLEEADDDLSK                             | 3  | 33563236                                                          | N-Term(iTRAQ4plex), K16(iTRAQ4plex)                                | 2076.98032 | 48 | 59  | 5.15 | Expt1 |
| LNIQPSETDYAVDIR                             | 9  | 236466498                                                         | N-Term(iTRAQ4plex)                                                 | 1877.97588 | 48 | 87  | 3.71 | Expt1 |
| ALANVNIAGSLICNVGAGGPAPAAAGAPAGGAAPSTAAAPAEK | 1  | 9256519                                                           | N-Term(iTRAQ4plex), C12(Methylthio), K43(iTRAQ4plex)               | 4060.08803 | 48 |     |      | Expt1 |
| GTGLQPGEELLPDIAPPLVTPDEPK                   | 3  | 7305619                                                           | N-Term(iTRAQ4plex), K25(iTRAQ4plex)                                | 2887.52488 | 48 | 56  | 4.34 | Expt1 |
| EQGVLSFWR                                   | 15 | 22094075                                                          | N-Term(iTRAQ4plex)                                                 | 1265.68035 | 48 | 50  | 3.52 | Expt1 |
| SNMDNMFESYINLR                              | 6  | 114145561                                                         | N-Term(iTRAQ4plex)                                                 | 1991.90666 | 48 | 88  | 4.27 | Expt1 |
| FVSTTSSSR                                   | 27 | 20911031                                                          | N-Term(iTRAQ4plex)                                                 | 1115.58074 | 48 | 51  | 3.22 | Expt1 |
| SYQSELEALR                                  | 2  | 112421039                                                         | N-Term(iTRAQ4plex)                                                 | 1339.70098 | 48 |     | 4.29 | Expt1 |
| VYEELAIPIVVR                                | 9  | 94364712;82617575                                                 | N-Term(iTRAQ4plex)                                                 | 1544.92156 | 48 | 52  | 3.88 | Expt1 |
| TVLDPVTGDLSDTR                              | 4  | 19527174                                                          | N-Term(iTRAQ4plex)                                                 | 1632.85832 | 48 | 60  | 3.70 | Expt1 |
| IDMYADGTQDLMMIAVAPFK                        | 5  | 160298217                                                         | N-Term(iTRAQ4plex), M3(Oxidation), M13(Oxidation), K21(iTRAQ4plex) | 2681.30069 | 48 | 52  | 4.94 | Expt1 |
| INPVEFNPEFVAR                               | 3  | 82896077                                                          | N-Term(iTRAQ4plex)                                                 | 1675.89739 | 48 | 43  | 3.59 | Expt1 |
| TLVLLMGK                                    | 5  | 6755040                                                           | N-Term(iTRAQ4plex), M6(Oxidation), K8(iTRAQ4plex)                  | 1178.75273 | 48 | 48  |      | Expt1 |
| FTSQPGYIGR                                  | 17 | 33469047                                                          | N-Term(iTRAQ4plex)                                                 | 1269.66936 | 48 | 52  | 3.73 | Expt1 |
| TGGLDLPSPPGTSLK                             | 20 | 125490382                                                         | N-Term(iTRAQ4plex), K16(iTRAQ4plex)                                | 1815.01055 | 48 | 75  | 4.18 | Expt1 |
| VQSTPVTIQVIDVR                              | 21 | 110625833                                                         | N-Term(iTRAQ4plex)                                                 | 1698.99236 | 48 | 72  | 4.47 | Expt1 |
| VVEEEWQIDR                                  | 3  | 121949760                                                         | N-Term(iTRAQ4plex)                                                 | 1574.79448 | 47 | 42  | 3.82 | Expt1 |
| SQAALGVLR                                   | 5  | 157823829;157823865                                               | N-Term(iTRAQ4plex)                                                 | 1058.64641 | 47 | 42  | 3.61 | Expt1 |
| ANNNTYGLAAGLFTK                             | 8  | 85861182                                                          | N-Term(iTRAQ4plex), N2(Deamidated), K15(iTRAQ4plex)                | 1830.99394 | 47 | 106 | 4.83 | Expt1 |
| IATVGYLPTQQDVLR                             | 3  | 6754004                                                           | N-Term(iTRAQ4plex)                                                 | 1818.03093 | 47 | 95  | 4.73 | Expt1 |
| SVLLDLTDSNVESK                              | 7  | 23346525                                                          | N-Term(iTRAQ4plex), K14(iTRAQ4plex)                                | 1807.98821 | 47 | 91  | 4.04 | Expt1 |
| SLAMLGSSSEDNTALSR                           | 4  | 71043944                                                          | N-Term(iTRAQ4plex)                                                 | 1795.89861 | 47 | 86  | 3.63 | Expt1 |
| EVAGQVGVPLQDLMVR                            | 8  | 161016822;161016820                                               | N-Term(iTRAQ4plex), M14(Oxidation)                                 | 1871.02165 | 47 | 62  | 3.95 | Expt1 |
| FITEPEGATEMGTLR                             | 6  | 149251314;189458807                                               | N-Term(iTRAQ4plex)                                                 | 1795.90703 | 47 | 62  | 3.35 | Expt1 |
| FGLTFMDR                                    | 12 | 6678321                                                           | N-Term(iTRAQ4plex)                                                 | 1231.62786 | 47 | 55  | 3.60 | Expt1 |
| VMILITDGK                                   | 10 | 111074529                                                         | N-Term(iTRAQ4plex), M2(Oxidation), K9(iTRAQ4plex)                  | 1293.77251 | 47 | 54  | 3.47 | Expt1 |
| APAAIGPYSQAVQVDR                            | 5  | 40807498                                                          | N-Term(iTRAQ4plex)                                                 | 1786.96147 | 47 | 51  | 3.22 | Expt1 |
| TEGLSVLNQAMAVIK                             | 5  | 13385624                                                          | N-Term(iTRAQ4plex), K15(iTRAQ4plex)                                | 1862.07749 | 47 | 50  | 3.97 | Expt1 |
| QIGDTLPVSCCTISASR                           | 3  | 31791059                                                          | N-Term(iTRAQ4plex), C10(Methylthio)                                | 1837.93096 | 47 | 50  | 3.22 | Expt1 |
| DLYPVIK                                     | 16 | 163310769                                                         | N-Term(iTRAQ4plex), K7(iTRAQ4plex)                                 | 1135.70635 | 47 | 45  | 3.23 | Expt1 |
| GFGVFSFER                                   | 12 | 6754972;31560656;255652857                                        | N-Term(iTRAQ4plex)                                                 | 1189.61223 | 47 | 55  | 3.15 | Expt1 |
| ADIVENQVMDTR                                | 11 | 6754084                                                           | N-Term(iTRAQ4plex), M9(Oxidation)                                  | 1550.76152 | 47 | 60  | 3.52 | Expt1 |
| DLPFYEEK                                    | 3  | 188497724                                                         | N-Term(iTRAQ4plex), K9(iTRAQ4plex)                                 | 1415.72649 | 47 | 52  | 3.15 | Expt1 |
| VGLPLPVPFSEPGYR                             | 5  | 21040233                                                          | N-Term(iTRAQ4plex)                                                 | 1771.99333 | 47 | 51  | 3.18 | Expt1 |
| GEWACIPYSQLR                                | 3  | 46849812                                                          | N-Term(iTRAQ4plex), C5(Methylthio)                                 | 1612.77385 | 47 | 35  | 3.72 | Expt1 |
| IAVGSDDLVIWDPDALK                           | 3  | 209862992;6681219                                                 | N-Term(iTRAQ4plex), K18(iTRAQ4plex)                                | 2202.19736 | 47 | 43  | 3.55 | Expt1 |
| LPAIEPSDQGGYLRCR                            | 10 | 149253040;183979966                                               | N-Term(iTRAQ4plex), C14(Methylthio)                                | 1879.91814 | 47 | 71  | 4.06 | Expt1 |
| VFTNLNIR                                    | 14 | 148277039                                                         | N-Term(iTRAQ4plex)                                                 | 1120.66113 | 47 | 49  | 3.06 | Expt1 |
| LGDDIDLIVR                                  | 8  | 125628629                                                         | N-Term(iTRAQ4plex)                                                 | 1272.72954 | 47 | 55  | 3.50 | Expt1 |
| LITPAVVSER                                  | 14 | 28372479;20846986;149255974;149258948;149259193;94393570;82959262 | N-Term(iTRAQ4plex)                                                 | 1228.74028 | 47 | 43  | 2.99 | Expt1 |
| LITPAVVSQR                                  | 14 | 82943174                                                          | N-Term(iTRAQ4plex), Q9(Deamidated)                                 | 1228.74028 | 47 | 43  | 2.99 | Expt1 |
| GYLGPQLPDCLK                                | 16 | 31982186                                                          | N-Term(iTRAQ4plex), C11(Methylthio), K13(iTRAQ4plex)               | 1766.90984 | 47 | 66  | 4.15 | Expt1 |
| TEIILATR                                    | 21 | 6755372                                                           | N-Term(iTRAQ4plex)                                                 | 1173.73332 | 47 | 48  | 3.53 | Expt1 |

|                              |    |                                                                                  |                                                                     |            |    |     |      |       |       |
|------------------------------|----|----------------------------------------------------------------------------------|---------------------------------------------------------------------|------------|----|-----|------|-------|-------|
| LPQFGISTPGSDLDINK            | 9  | 61743961                                                                         | N-Term(iTRAQ4plex), K18(iTRAQ4plex)                                 | 2203.22568 | 47 | 78  | 4.62 | Expt1 |       |
| TTTTYTGVPQVQNGDLEEQMSTTAR    | 12 | 28395018                                                                         | N-Term(iTRAQ4plex)                                                  | 2834.33768 | 47 | 82  | 4.04 | Expt1 |       |
| NLANTVTEEILEK                | 5  | 114145493;29788787                                                               | N-Term(iTRAQ4plex), K13(iTRAQ4plex)                                 | 1761.99259 | 47 | 58  | 4.72 | Expt1 |       |
| TPETAFLGEDLLQVEQR            | 6  | 85838509                                                                         | N-Term(iTRAQ4plex)                                                  | 2219.13480 | 47 | 80  | 4.66 | Expt1 |       |
| LSQNLISR                     | 7  | 229608920                                                                        | N-Term(iTRAQ4plex)                                                  | 1074.63872 | 47 | 42  | 2.98 | Expt1 |       |
| NSSYFVEWIPNNVK               | 12 | 33859488;31981939;7106439;2165384;21746161;149253488;149253527;27754056;12963615 | N-Term(iTRAQ4plex), K14(iTRAQ4plex)                                 | 1985.04436 | 47 | 79  | 4.19 | Expt1 |       |
| SAADLISQAR                   | 10 | 209862992;6681219                                                                | N-Term(iTRAQ4plex)                                                  | 1175.65227 | 47 | 49  | 3.11 | Expt1 |       |
| LMTDTINEPILLCR               | 4  | 219276601;219275596                                                              | N-Term(iTRAQ4plex), M2(Oxidation), C13(Methylthio)                  | 1837.93962 | 47 | 57  | 3.49 | Expt1 |       |
| TDLTAVPASR                   | 3  | 9789985                                                                          | N-Term(iTRAQ4plex)                                                  | 1174.65398 | 47 | 42  | 3.38 | Expt1 |       |
| EVASNTEMIQTSK                | 3  | 226823220                                                                        | N-Term(iTRAQ4plex), M8(Oxidation), K13(iTRAQ4plex)                  | 1741.89164 | 47 | 44  | 4.69 | Expt1 |       |
| ILPVFDEPPNPTNVEESLK          | 4  | 8394460                                                                          | N-Term(iTRAQ4plex), K19(iTRAQ4plex)                                 | 2426.31351 | 47 | 60  | 4.96 | Expt1 |       |
| VQEQLTR                      | 2  | 82950147;149264086                                                               | N-Term(iTRAQ4plex)                                                  | 1146.62566 | 47 |     | 3.31 | Expt1 |       |
| DLTGFPPK                     | 4  | 148277039                                                                        | N-Term(iTRAQ4plex), K7(iTRAQ4plex)                                  | 1065.61113 | 47 |     | 2.83 | Expt1 |       |
| SENGLEFTSSGSANTETTK          | 3  | 6755963                                                                          | N-Term(iTRAQ4plex), N3(Deamidated), K19(iTRAQ4plex)                 | 2249.06815 | 47 | 76  | 6.74 | Expt1 |       |
| GSQFFPGNNVIYEK               | 3  | 31657132                                                                         | N-Term(iTRAQ4plex), K14(iTRAQ4plex)                                 | 1887.99138 | 47 | 57  | 3.81 | Expt1 |       |
| FNVSATPEQYVYPSTTR            | 6  | 27228985                                                                         | N-Term(iTRAQ4plex)                                                  | 2104.04912 | 47 | 65  | 4.56 | Expt1 |       |
| LSEQELEFR                    | 5  | 70608131                                                                         | N-Term(iTRAQ4plex)                                                  | 1294.67900 | 47 | 42  | 3.59 | Expt1 |       |
| VLNNMEIGTSLYDEEGAK           | 3  | 70778976                                                                         | N-Term(iTRAQ4plex), M5(Oxidation), K18(iTRAQ4plex)                  | 2287.14530 | 47 | 62  | 5.07 | Expt1 |       |
| AGCQVVAPSDMMMDGR             | 8  | 34328485                                                                         | N-Term(iTRAQ4plex), C3(Methylthio)                                  | 1726.75054 | 47 | 63  | 4.19 | Expt1 |       |
| EALELTDGLLSGSEER             | 24 | 134288917                                                                        | N-Term(iTRAQ4plex)                                                  | 1963.99651 | 47 | 104 | 1.23 | 4.33  | Expt1 |
| DVDPDVAYSSIPYEK              | 5  | 116734870                                                                        | N-Term(iTRAQ4plex), K15(iTRAQ4plex)                                 | 1985.99419 | 47 | 73  | 3.64 | Expt1 |       |
| VTNGAFTGEISPGMIK             | 6  | 226958349                                                                        | N-Term(iTRAQ4plex), N3(Deamidated), M14(Oxidation), K16(iTRAQ4plex) | 1927.01126 | 47 | 65  | 4.50 | Expt1 |       |
| AEVDVADELLENLAK              | 5  | 27229052;254281178                                                               | N-Term(iTRAQ4plex), K15(iTRAQ4plex)                                 | 1917.05234 | 47 | 59  | 4.02 | Expt1 |       |
| MATEVAADALGEEWK              | 3  | 94367038;82885362;149258986;149265796;149271678                                  | N-Term(iTRAQ4plex), M1(Oxidation), K15(iTRAQ4plex)                  | 1924.96543 | 47 | 42  | 3.78 | Expt1 |       |
| TLNDNDIMLIK                  | 3  | 51092303;84781771                                                                | N-Term(iTRAQ4plex), M7(Oxidation), K10(iTRAQ4plex)                  | 1479.83611 | 47 | 46  | 3.66 | Expt1 |       |
| TLNDNDIMLIK                  | 6  | 149254987;149255095;84781768;51010909;6755893;6755891;16716569                   | N-Term(iTRAQ4plex), N3(Deamidated), M7(Oxidation), K10(iTRAQ4plex)  | 1479.83611 | 47 | 46  | 3.66 | Expt1 |       |
| DFVNYLVR                     | 2  | 150456419                                                                        | N-Term(iTRAQ4plex)                                                  | 1169.64299 | 47 |     | 3.04 | Expt1 |       |
| GVPGSIVNVSSMVAHVTFPNLITYSSTK | 2  | 6671688                                                                          | N-Term(iTRAQ4plex), K28(iTRAQ4plex)                                 | 3193.72475 | 47 |     | 3.34 | Expt1 |       |
| WNPNNWVFGGGTAK               | 10 | 33469047                                                                         | N-Term(iTRAQ4plex), K15(iTRAQ4plex)                                 | 1935.01664 | 47 | 50  | 4.45 | Expt1 |       |
| DVDEVSSLLR                   | 17 | 126723461                                                                        | N-Term(iTRAQ4plex)                                                  | 1276.68804 | 47 | 63  | 3.59 | Expt1 |       |
| LGESQTLQQFSR                 | 11 | 115496850                                                                        | N-Term(iTRAQ4plex)                                                  | 1537.81267 | 47 | 54  | 4.38 | Expt1 |       |
| IIGIDINK                     | 3  | 82892669;31982511;31560625                                                       | N-Term(iTRAQ4plex), K8(iTRAQ4plex)                                  | 1173.73821 | 47 | 55  | 2.87 | Expt1 |       |
| LEQQVPVNQVFGQDEMDIVIGVTK     | 5  | 149252852;149255712;149255716;94404874;149270989;149270993;149271090;149271094   | N-Term(iTRAQ4plex), M16(Oxidation), K24(iTRAQ4plex)                 | 2990.58359 | 47 | 54  | 3.91 | Expt1 |       |
| GVFSGLR                      | 16 | 20137008                                                                         | N-Term(iTRAQ4plex)                                                  | 879.51982  | 47 | 40  |      | Expt1 |       |
| SMPTSGALDR                   | 2  | 227330633                                                                        | N-Term(iTRAQ4plex)                                                  | 1178.59917 | 47 | 38  |      | Expt1 |       |
| GLIDYDTFK                    | 3  | 82950147;82950149;149264086                                                      | N-Term(iTRAQ4plex), K9(iTRAQ4plex)                                  | 1359.74175 | 47 | 38  | 3.69 | Expt1 |       |
| IDQYQGADAVGLEEK              | 3  | 31543902                                                                         | N-Term(iTRAQ4plex), K15(iTRAQ4plex)                                 | 1923.99382 | 47 | 59  | 4.74 | Expt1 |       |
| YIIWSPVCR                    | 6  | 84871986                                                                         | N-Term(iTRAQ4plex), C8(Methylthio)                                  | 1326.68315 | 47 | 41  | 3.01 | Expt1 |       |
| GSPFPEVAESVQLELESYR          | 7  | 58037481                                                                         | N-Term(iTRAQ4plex)                                                  | 2296.12864 | 47 | 55  | 4.32 | Expt1 |       |
| AQEQLATALQNLEEAIEK           | 6  | 47894398                                                                         | N-Term(iTRAQ4plex), K17(iTRAQ4plex)                                 | 2174.16373 | 47 | 48  | 5.25 | Expt1 |       |
| DVFISAAER                    | 3  | 7242197                                                                          | N-Term(iTRAQ4plex)                                                  | 1151.61772 | 47 | 40  | 3.01 | Expt1 |       |
| QDLPNAMAISEMTDK              | 5  | 6680720                                                                          | N-Term(iTRAQ4plex), K15(iTRAQ4plex)                                 | 1951.97173 | 47 | 87  | 3.85 | Expt1 |       |
| ELVFYLLMMAK                  | 13 | 148277039                                                                        | N-Term(iTRAQ4plex), M9(Oxidation), K11(iTRAQ4plex)                  | 1711.90647 | 47 | 51  | 3.75 | Expt1 |       |
| INEAIVAVQAIADPK              | 3  | 149251291;13386026                                                               | N-Term(iTRAQ4plex), K16(iTRAQ4plex)                                 | 1953.17466 | 47 | 36  | 3.29 | Expt1 |       |
| AANEAGYFNEEMAPIEVK           | 3  | 29126205                                                                         | N-Term(iTRAQ4plex), M12(Oxidation), K18(iTRAQ4plex)                 | 2287.11893 | 47 | 50  | 4.34 | Expt1 |       |
| AFLGGQEATDIALLR              | 6  | 118601017                                                                        | N-Term(iTRAQ4plex)                                                  | 1960.10392 | 47 | 87  | 5.95 | Expt1 |       |

|                                 |    |                                                                                                   |                                                                         |            |    |     |      |       |
|---------------------------------|----|---------------------------------------------------------------------------------------------------|-------------------------------------------------------------------------|------------|----|-----|------|-------|
| SDQVNGVLVLSLLDK                 | 6  | 6679567                                                                                           | N-Term(iTRAQ4plex), N5(Deamidated), K15(iTRAQ4plex)                     | 1889.08391 | 47 | 80  | 4.11 | Expt1 |
| LMDVGLIAIR                      | 6  | 14389431                                                                                          | N-Term(iTRAQ4plex)                                                      | 1244.75493 | 47 | 48  | 3.28 | Expt1 |
| AASISAVSLEVAQPGPSSGPR           | 10 | 183979966                                                                                         | N-Term(iTRAQ4plex)                                                      | 2125.14054 | 47 | 63  | 5.17 | Expt1 |
| VTMQNLNDR                       | 22 | 6680604;19526922;112983636;<br>7106337;226823220;21489935                                         | N-Term(iTRAQ4plex)                                                      | 1234.63701 | 47 | 56  | 3.74 | Expt1 |
| VTMQNLNDR                       | 28 | 198278448                                                                                         | N-Term(iTRAQ4plex), N7(Deamidated)                                      | 1234.63245 | 47 | 56  | 3.74 | Expt1 |
| AELSSLQTSR                      | 3  | 29336026                                                                                          | N-Term(iTRAQ4plex)                                                      | 1235.67424 | 46 | 37  | 3.15 | Expt1 |
| SGFSSVSVCR                      | 45 | 54607171;113195684                                                                                | N-Term(iTRAQ4plex), C9(Methylthio)                                      | 1218.57268 | 46 | 64  | 3.98 | Expt1 |
| VAEQTPLTALYVANLIK               | 11 | 6753036                                                                                           | N-Term(iTRAQ4plex), K17(iTRAQ4plex)                                     | 2132.26572 | 46 | 55  | 4.09 | Expt1 |
| EADDIVNWLK                      | 2  | 42415475                                                                                          | N-Term(iTRAQ4plex), K10(iTRAQ4plex)                                     | 1490.82195 | 46 | 40  |      | Expt1 |
| VLQALEGLK                       | 3  | 149249753;94372784;1492533<br>95;94397093;38083674;829960<br>42;12963511                          | N-Term(iTRAQ4plex), K9(iTRAQ4plex)                                      | 1258.80974 | 46 | 62  | 3.84 | Expt1 |
| NVFDEAILALEPPEPK                | 5  | 6753364                                                                                           | N-Term(iTRAQ4plex), K17(iTRAQ4plex)                                     | 2141.17984 | 46 | 44  | 4.74 | Expt1 |
| AEPATPAEAAQSDR                  | 1  | 31982724                                                                                          | N-Term(iTRAQ4plex)                                                      | 1557.76665 | 46 |     |      | Expt1 |
| GAGTDEFITLNR                    | 3  | 160707925                                                                                         | N-Term(iTRAQ4plex)                                                      | 1324.66155 | 46 | 57  | 3.75 | Expt1 |
| ILVCLLQGSR                      | 18 | 149265291;22165408                                                                                | N-Term(iTRAQ4plex), C4(Methylthio)                                      | 1291.73491 | 46 | 47  | 3.62 | Expt1 |
| DNQSGSLLFIGR                    | 13 | 161353502                                                                                         | N-Term(iTRAQ4plex)                                                      | 1450.77983 | 46 | 71  | 5.08 | Expt1 |
| IVYLYTK                         | 3  | 149252605;149254156;829524<br>19;149265264;149268895;1492<br>75043                                | N-Term(iTRAQ4plex), K7(iTRAQ4plex)                                      | 1187.73906 | 46 | 47  | 2.94 | Expt1 |
| TPIVIIK                         | 3  | 226246550;226246552                                                                               | N-Term(iTRAQ4plex), K7(iTRAQ4plex)                                      | 1071.74541 | 46 | 51  | 2.84 | Expt1 |
| VTQECSEYR                       | 12 | 111185907                                                                                         | N-Term(iTRAQ4plex), C5(Methylthio)                                      | 1304.57353 | 46 | 49  | 3.78 | Expt1 |
| GQNIQLYPEVPEVLGR                | 2  | 12963663                                                                                          | N-Term(iTRAQ4plex)                                                      | 1956.07402 | 46 |     | 3.54 | Expt1 |
| AAFVLPEFTR                      | 2  | 6678131                                                                                           | N-Term(iTRAQ4plex)                                                      | 1294.73113 | 46 |     | 3.51 | Expt1 |
| SFSTVPYIVGINK                   | 7  | 117553604                                                                                         | N-Term(iTRAQ4plex), K13(iTRAQ4plex)                                     | 1712.99004 | 46 | 75  | 3.68 | Expt1 |
| MLTYDPMLLFTGR                   | 22 | 31560625                                                                                          | N-Term(iTRAQ4plex), M1(Oxidation), M7(Oxidation)                        | 1733.87346 | 46 | 61  | 3.66 | Expt1 |
| ISIAEGIER                       | 16 | 82950147;82950149;14926408<br>6                                                                   | N-Term(iTRAQ4plex)                                                      | 1131.65007 | 46 | 41  | 3.38 | Expt1 |
| ILNPEEIEK                       | 3  | 7106389                                                                                           | N-Term(iTRAQ4plex), K9(iTRAQ4plex)                                      | 1372.80107 | 46 | 53  | 3.29 | Expt1 |
| LVDLLR                          | 6  | 9790161;225543311                                                                                 | N-Term(iTRAQ4plex)                                                      | 872.56926  | 46 | 29  |      | Expt1 |
| ALEYTIYNQELNETR                 | 3  | 36031035                                                                                          | N-Term(iTRAQ4plex)                                                      | 2001.00371 | 46 | 72  | 4.49 | Expt1 |
| LIVALMYPYSYEAQ                  | 17 | 149265291;22165408                                                                                | N-Term(iTRAQ4plex), M6(Oxidation), K15(iTRAQ4plex)                      | 2062.12847 | 46 | 71  | 4.35 | Expt1 |
| EGGSIPVTLTFQEAATGK              | 8  | 31981273                                                                                          | N-Term(iTRAQ4plex), K17(iTRAQ4plex)                                     | 2023.10300 | 46 | 62  | 4.68 | Expt1 |
| GSCATPGAGSDICFMQK               | 3  | 9790161                                                                                           | N-Term(iTRAQ4plex), C3(Methylthio), C13(Methylthio),<br>K17(iTRAQ4plex) | 2052.89737 | 46 | 55  | 3.63 | Expt1 |
| FFQPTEMAAQDFFQR                 | 4  | 6671561;116256510                                                                                 | N-Term(iTRAQ4plex)                                                      | 2006.96170 | 46 | 52  | 4.10 | Expt1 |
| DYTGEDVTPENFLAVLR               | 4  | 7242187                                                                                           | N-Term(iTRAQ4plex)                                                      | 2083.04912 | 46 | 52  | 3.41 | Expt1 |
| EFSDVGYER                       | 4  | 23956222                                                                                          | N-Term(iTRAQ4plex)                                                      | 1358.67119 | 46 | 47  | 3.34 | Expt1 |
| QLLLTADDR                       | 14 | 6671539                                                                                           | N-Term(iTRAQ4plex)                                                      | 1188.67143 | 46 | 51  | 3.40 | Expt1 |
| APIIAVTR                        | 25 | 31981562                                                                                          | N-Term(iTRAQ4plex)                                                      | 984.63207  | 46 | 44  | 2.96 | Expt1 |
| FVNVVPTFGK                      | 3  | 149268015;149268096                                                                               | N-Term(iTRAQ4plex), K10(iTRAQ4plex)                                     | 1395.82353 | 46 | 55  | 3.49 | Expt1 |
| TDSFSCNVR                       | 7  | 149263750                                                                                         | N-Term(iTRAQ4plex), C6(Methylthio)                                      | 1218.53801 | 46 | 36  | 3.17 | Expt1 |
| ALADTENLR                       | 2  | 13277394                                                                                          | N-Term(iTRAQ4plex)                                                      | 1146.62334 | 46 |     | 3.16 | Expt1 |
| IDFSSIAVPGTSPQQR                | 3  | 63003917                                                                                          | N-Term(iTRAQ4plex)                                                      | 1961.02141 | 46 | 54  | 4.13 | Expt1 |
| GIPIEIPMAYVPVSR                 | 5  | 94536844                                                                                          | N-Term(iTRAQ4plex)                                                      | 1885.07695 | 46 | 41  | 3.40 | Expt1 |
| SYIEGYVPSQADVAVFEAVSGPPADLCHALR | 3  | 31980922                                                                                          | N-Term(iTRAQ4plex), C28(Methylthio)                                     | 3548.73008 | 46 | 52  | 4.61 | Expt1 |
| VANPSGNLTDYVQDCGDGTYK           | 3  | 125347376                                                                                         | N-Term(iTRAQ4plex), C16(Methylthio), K22(iTRAQ4plex)                    | 2652.22135 | 46 | 77  | 5.44 | Expt1 |
| VSEIFQVLPETEQEIR                | 5  | 111185907                                                                                         | N-Term(iTRAQ4plex)                                                      | 2061.10307 | 46 |     | 3.81 | Expt1 |
| LVPLLDGTGDIIDGGNSEYR            | 10 | 124486895                                                                                         | N-Term(iTRAQ4plex)                                                      | 2304.22295 | 46 | 85  | 5.22 | Expt1 |
| ATCIGNNSAAAVSMLK                | 5  | 6755196                                                                                           | N-Term(iTRAQ4plex), C3(Methylthio), K16(iTRAQ4plex)                     | 1884.95757 | 46 | 121 | 5.11 | Expt1 |
| LGEWVGLCK                       | 3  | 149257324;149250091;149258<br>592;149258678;51768484;1492<br>72169;51772387;83003650;812<br>30474 | N-Term(iTRAQ4plex), C8(Methylthio), K9(iTRAQ4plex)                      | 1338.71770 | 46 | 51  | 3.39 | Expt1 |
| LSSFYSLK                        | 3  | 6678103                                                                                           | N-Term(iTRAQ4plex), K8(iTRAQ4plex)                                      | 1232.72429 | 46 | 48  | 3.09 | Expt1 |
| FAGVDIR                         | 2  | 149254484;149262347                                                                               | N-Term(iTRAQ4plex)                                                      | 921.52831  | 46 |     |      | Expt1 |

|                                |    |                                                                                  |                                                      |            |    |    |      |      |       |
|--------------------------------|----|----------------------------------------------------------------------------------|------------------------------------------------------|------------|----|----|------|------|-------|
| NTPAFFAER                      | 4  | 149265356;149265358;160707921                                                    | N-Term(iTRAQ4plex)                                   | 1196.61919 | 46 |    |      | 3.25 | Expt1 |
| GTVEPQLEAR                     | 13 | 125347376                                                                        | N-Term(iTRAQ4plex)                                   | 1243.67595 | 46 | 50 |      | 3.54 | Expt1 |
| EILSQEALPAPLGGAPQGGTAGDTQQQVLR | 4  | 22122725                                                                         | N-Term(iTRAQ4plex)                                   | 3089.64292 | 46 | 68 |      | 4.53 | Expt1 |
| GIFVQSVMPYLVATK                | 3  | 9789991                                                                          | N-Term(iTRAQ4plex), K15(iTRAQ4plex)                  | 1941.11277 | 46 | 53 |      | 5.04 | Expt1 |
| TSATWFALSR                     | 5  | 21450277                                                                         | N-Term(iTRAQ4plex)                                   | 1283.68706 | 46 | 40 |      | 3.30 | Expt1 |
| TEFLSFMNTELAFTK                | 14 | 149263303;94404308;21886811                                                      | N-Term(iTRAQ4plex), M7(Oxidation), K16(iTRAQ4plex)   | 2154.10552 | 46 | 82 |      | 4.42 | Expt1 |
| AEELGLPILGVLR                  | 9  | 18700004;22122797                                                                | N-Term(iTRAQ4plex)                                   | 1523.92986 | 46 | 58 |      | 4.04 | Expt1 |
| SLPVNDVLDVFER                  | 3  | 58037159                                                                         | N-Term(iTRAQ4plex)                                   | 1733.92705 | 46 | 69 |      | 3.63 | Expt1 |
| TLPSSGPQNLNLR                  | 3  | 226423922                                                                        | N-Term(iTRAQ4plex)                                   | 1313.73039 | 46 | 49 |      | 2.86 | Expt1 |
| ALAAAGVGVSIVR                  | 6  | 224809382                                                                        | N-Term(iTRAQ4plex)                                   | 1214.73418 | 46 | 39 |      | 3.11 | Expt1 |
| FQIQDISVETEDNK                 | 5  | 55926127;117938332;117938334                                                     | N-Term(iTRAQ4plex), K14(iTRAQ4plex)                  | 1954.00517 | 46 | 55 |      | 5.28 | Expt1 |
| YQTLPGSLEVTQTGSK               | 13 | 110625833                                                                        | N-Term(iTRAQ4plex), K16(iTRAQ4plex)                  | 1997.08098 | 46 | 82 |      | 4.76 | Expt1 |
| ELFEADPER                      | 7  | 94380203;254553458                                                               | N-Term(iTRAQ4plex)                                   | 1249.62163 | 46 | 44 |      | 3.42 | Expt1 |
| SAINEVVTR                      | 9  | 149234297;149233921;82898755                                                     | N-Term(iTRAQ4plex)                                   | 1132.64604 | 46 | 53 |      | 3.64 | Expt1 |
| YSFLQFDPAPR                    | 3  | 8394024;149258657;9506983                                                        | N-Term(iTRAQ4plex)                                   | 1484.76848 | 46 | 44 |      | 4.08 | Expt1 |
| VSNAGSMSVSLVADENPFAQGALR       | 6  | 28916693                                                                         | N-Term(iTRAQ4plex), N3(Deamidated), M8(Oxidation)    | 2638.29471 | 46 | 94 |      | 5.36 | Expt1 |
| AAPFTLEYR                      | 15 | 27754065                                                                         | N-Term(iTRAQ4plex)                                   | 1211.65788 | 46 | 50 |      | 3.52 | Expt1 |
| GGKPEPPAMPQPVPPTA              | 2  | 6755372                                                                          | N-Term(iTRAQ4plex), K3(iTRAQ4plex)                   | 1862.00425 | 46 |    |      | 3.69 | Expt1 |
| CPDNTLGVDCIER                  | 6  | 94394792;171543883                                                               | N-Term(iTRAQ4plex), C1(Methylthio), C10(Methylthio)  | 1670.71355 | 46 | 36 |      | 3.55 | Expt1 |
| YMAEALLLR                      | 3  | 27552760                                                                         | N-Term(iTRAQ4plex)                                   | 1223.69536 | 46 | 44 |      | 3.22 | Expt1 |
| ITQSNAILR                      | 7  | 82882853;82996105;149269937;28076911;238018082;113679874;6754086;6680121;6754084 | N-Term(iTRAQ4plex)                                   | 1159.69328 | 46 | 35 |      | 3.36 | Expt1 |
| EIDPGTQLYTVTSSLEYK             | 7  | 31791059                                                                         | N-Term(iTRAQ4plex), K18(iTRAQ4plex)                  | 2332.22715 | 46 | 75 |      | 5.04 | Expt1 |
| VAPEEHPVLLTEAPLNPK             | 4  | 6671509;6752954                                                                  | N-Term(iTRAQ4plex), K18(iTRAQ4plex)                  | 2242.27549 | 46 | 46 |      | 5.40 | Expt1 |
| AEALPLQR                       | 1  | 31982236                                                                         | N-Term(iTRAQ4plex)                                   | 1041.61992 | 46 |    |      |      | Expt1 |
| GAGTGGGLGLAVEGPSEAK            | 3  | 125347376                                                                        | N-Term(iTRAQ4plex), K18(iTRAQ4plex)                  | 1859.01958 | 46 | 92 |      | 5.07 | Expt1 |
| QMEQISQFLQAAER                 | 4  | 30519911                                                                         | N-Term(iTRAQ4plex)                                   | 1822.92807 | 46 | 55 |      | 5.15 | Expt1 |
| SLVEASSSGVSVLSLCEK             | 7  | 6755100                                                                          | N-Term(iTRAQ4plex), C16(Methylthio), K18(iTRAQ4plex) | 2129.11887 | 46 | 91 |      | 4.23 | Expt1 |
| LVSPGSANETSSILVESVTR           | 7  | 145966915                                                                        | N-Term(iTRAQ4plex)                                   | 2190.17960 | 46 | 90 |      | 4.35 | Expt1 |
| YLGAEYMQSVGNMR                 | 9  | 20330802                                                                         | N-Term(iTRAQ4plex), M7(Oxidation)                    | 1778.83513 | 46 | 74 |      | 3.38 | Expt1 |
| DTPTQEDWLVSVLPEGSR             | 3  | 42476274                                                                         | N-Term(iTRAQ4plex)                                   | 2173.09136 | 46 | 68 |      | 4.09 | Expt1 |
| GAAAMIPGPQTVAIEIR              | 8  | 7305029;54873604                                                                 | N-Term(iTRAQ4plex)                                   | 1826.99639 | 46 | 51 |      | 3.65 | Expt1 |
| YVIHTVGPPIAVGQPTASQAAELR       | 3  | 170650601                                                                        | N-Term(iTRAQ4plex)                                   | 2522.38840 | 46 | 42 |      | 4.21 | Expt1 |
| SPILVATAVAAR                   | 5  | 6753620;14861844                                                                 | N-Term(iTRAQ4plex)                                   | 1312.80913 | 46 | 53 |      | 3.37 | Expt1 |
| APQLVGGFIAR                    | 6  | 110625656;270309161                                                              | N-Term(iTRAQ4plex)                                   | 1343.79277 | 46 | 48 |      | 3.65 | Expt1 |
| ITFSQWVPLMDESIR                | 3  | 31982393                                                                         | N-Term(iTRAQ4plex)                                   | 2016.00957 | 46 | 55 |      | 4.64 | Expt1 |
| GYAFIEFASFEDAK                 | 5  | 84875537                                                                         | N-Term(iTRAQ4plex), K14(iTRAQ4plex)                  | 1882.95719 | 46 | 58 |      | 4.09 | Expt1 |
| SSNTYTLTDVIR                   | 5  | 31791059                                                                         | N-Term(iTRAQ4plex)                                   | 1400.71440 | 46 | 61 |      | 3.88 | Expt1 |
| QLLEGELEPLR                    | 10 | 112421039                                                                        | N-Term(iTRAQ4plex)                                   | 1440.82048 | 46 | 57 |      | 4.01 | Expt1 |
| LMMDPLTGLNLR                   | 4  | 114145493;29788787                                                               | N-Term(iTRAQ4plex)                                   | 1404.74785 | 46 | 50 |      | 3.54 | Expt1 |
| SQEVAPLPQR                     | 7  | 111185907                                                                        | N-Term(iTRAQ4plex)                                   | 1268.70781 | 46 | 38 |      | 3.40 | Expt1 |
| AMLSGGQGFENETNEVNFIR           | 3  | 149249090;82923135                                                               | N-Term(iTRAQ4plex)                                   | 2355.12394 | 46 | 66 |      | 4.86 | Expt1 |
| VTQVDGNSPVR                    | 3  | 148747410                                                                        | N-Term(iTRAQ4plex)                                   | 1315.71233 | 46 | 55 |      | 3.51 | Expt1 |
| NPYLPPETITLYLK                 | 5  | 149267864;75677437                                                               | N-Term(iTRAQ4plex), K13(iTRAQ4plex)                  | 1837.03923 | 46 | 44 |      | 3.57 | Expt1 |
| VAIEEPGPGLAR                   | 7  | 115647999                                                                        | N-Term(iTRAQ4plex)                                   | 1352.76360 | 46 | 50 |      | 3.57 | Expt1 |
| YSAPCSAGYGNA                   | 4  | 148277039                                                                        | N-Term(iTRAQ4plex), Y1(iTRAQ4plex), C5(Methylthio)   | 1494.66106 | 46 | 36 |      | 3.53 | Expt1 |
| NLQPGSEYTVTLVAVK               | 9  | 46849812                                                                         | N-Term(iTRAQ4plex), K16(iTRAQ4plex)                  | 2007.13694 | 46 | 41 | 1.33 | 3.88 | Expt1 |
| GSDDFDCELR                     | 15 | 13384620;149264394                                                               | N-Term(iTRAQ4plex), C6(Methylthio)                   | 1231.52263 | 46 | 45 |      | 3.06 | Expt1 |
| TEMENEFVLIK                    | 3  | 114145561                                                                        | N-Term(iTRAQ4plex), M3(Oxidation), K11(iTRAQ4plex)   | 1656.88530 | 46 | 44 |      | 3.81 | Expt1 |

|                     |    |                                                                                                                                                       |                                                    |            |    |    |  |      |       |
|---------------------|----|-------------------------------------------------------------------------------------------------------------------------------------------------------|----------------------------------------------------|------------|----|----|--|------|-------|
| WASVVVPLGK          | 3  | 94401936;149269211;94402757;149274805;6754138;219521935;124486638;68534959;46559400;160333390;133778955;66955877;133922588;6754132                    | N-Term(iTRAQ4plex), K10(iTRAQ4plex)                | 1343.82414 | 46 | 46 |  | 3.74 | Expt1 |
| SLQSVAEER           | 8  | 13385036;149233830;82896911;149262861;149266587;149267527;82984224                                                                                    | N-Term(iTRAQ4plex)                                 | 1162.61523 | 45 | 62 |  | 3.53 | Expt1 |
| GAWSNVLR            | 8  | 22094075;148747424                                                                                                                                    | N-Term(iTRAQ4plex)                                 | 1046.58623 | 45 | 40 |  | 3.11 | Expt1 |
| ADEGISFR            | 4  | 94400195;149267887;6754976                                                                                                                            | N-Term(iTRAQ4plex)                                 | 1038.53447 | 45 | 36 |  |      | Expt1 |
| QWLQEIDR            | 6  | 6679587;21313162                                                                                                                                      | N-Term(iTRAQ4plex)                                 | 1231.65691 | 45 |    |  | 3.25 | Expt1 |
| FSFPDVTIGSER        | 3  | 23346525                                                                                                                                              | N-Term(iTRAQ4plex)                                 | 1595.82463 | 45 | 40 |  | 3.34 | Expt1 |
| AVVGVVAGGGR         | 12 | 6755358                                                                                                                                               | N-Term(iTRAQ4plex)                                 | 1085.65618 | 45 | 47 |  | 3.49 | Expt1 |
| CFIEEIPDETMVIGNYR   | 5  | 19527236;145966911                                                                                                                                    | N-Term(iTRAQ4plex), C1(Methylthio)                 | 2219.04068 | 45 | 53 |  | 3.87 | Expt1 |
| AAELQAQWER          | 3  | 55926127                                                                                                                                              | N-Term(iTRAQ4plex)                                 | 1345.70110 | 45 |    |  | 3.57 | Expt1 |
| YSMYLTPK            | 2  | 160333881                                                                                                                                             | N-Term(iTRAQ4plex), K8(iTRAQ4plex)                 | 1290.70781 | 45 |    |  | 3.40 | Expt1 |
| DFLTPLLSVR          | 2  | 6671561;116256510                                                                                                                                     | N-Term(iTRAQ4plex)                                 | 1401.82463 | 45 |    |  |      | Expt1 |
| FDVEPDTYCR          | 21 | 125490382                                                                                                                                             | N-Term(iTRAQ4plex), C9(Methylthio)                 | 1434.61601 | 45 | 46 |  | 3.52 | Expt1 |
| AMLSGPGQFAENETNEVNF | 6  | 149249090;82923135                                                                                                                                    | N-Term(iTRAQ4plex), M2(Oxidation)                  | 2371.11289 | 45 | 62 |  | 5.59 | Expt1 |
| LEYCEALAMLR         | 3  | 211065507                                                                                                                                             | N-Term(iTRAQ4plex), C4(Methylthio)                 | 1501.73503 | 45 | 60 |  | 3.95 | Expt1 |
| EGIPPDQQR           | 30 | 9845265;149249766;149250554;82894992;149254469;149254584;94378076;82902501;94385661;149259705;149259811;149260017;149262307;94400086;82996161;6755919 | N-Term(iTRAQ4plex)                                 | 1183.61907 | 45 | 52 |  | 2.87 | Expt1 |
| EFVISDR             | 4  | 19482160                                                                                                                                              | N-Term(iTRAQ4plex)                                 | 1009.54369 | 45 |    |  |      | Expt1 |
| QWELLLEK            | 3  | 115496850                                                                                                                                             | N-Term(iTRAQ4plex), K8(iTRAQ4plex)                 | 1346.80327 | 45 | 51 |  | 3.20 | Expt1 |
| DMDVVSGR            | 14 | 6753824                                                                                                                                               | N-Term(iTRAQ4plex)                                 | 1022.50525 | 45 | 48 |  | 3.09 | Expt1 |
| MLEEELEAMR          | 8  | 82950147;149264086                                                                                                                                    | N-Term(iTRAQ4plex)                                 | 1394.68218 | 45 | 54 |  | 3.55 | Expt1 |
| VIEGSFVYK           | 3  | 116089273                                                                                                                                             | N-Term(iTRAQ4plex), K9(iTRAQ4plex)                 | 1329.77239 | 45 | 57 |  | 3.63 | Expt1 |
| DLALAIR             | 31 | 110227377                                                                                                                                             | N-Term(iTRAQ4plex)                                 | 915.57262  | 45 | 43 |  | 2.95 | Expt1 |
| VVLVLAGR            | 23 | 149262383;82881899;20344851;94398829                                                                                                                  | N-Term(iTRAQ4plex)                                 | 970.65557  | 45 | 39 |  | 3.13 | Expt1 |
| QIIVDPLSFSEER       | 18 | 6753294                                                                                                                                               | N-Term(iTRAQ4plex)                                 | 1676.90264 | 45 | 67 |  | 3.86 | Expt1 |
| FLILPDMLK           | 6  | 13385598                                                                                                                                              | N-Term(iTRAQ4plex), K9(iTRAQ4plex)                 | 1377.84502 | 45 | 62 |  | 3.21 | Expt1 |
| WALWFFK             | 3  | 94370433;83627717                                                                                                                                     | N-Term(iTRAQ4plex), K7(iTRAQ4plex)                 | 1285.74504 | 45 | 50 |  | 3.05 | Expt1 |
| IVVLLQR             | 18 | 6755212                                                                                                                                               | N-Term(iTRAQ4plex)                                 | 984.66814  | 45 | 39 |  | 2.87 | Expt1 |
| DIDECLQNGR          | 10 | 118197277                                                                                                                                             | N-Term(iTRAQ4plex), C5(Methylthio), N8(Deamidated) | 1353.59148 | 45 | 54 |  | 4.16 | Expt1 |
| AGIIASAR            | 5  | 33859482                                                                                                                                              | N-Term(iTRAQ4plex)                                 | 902.55510  | 45 | 46 |  |      | Expt1 |
| QTMQDLNDR           | 13 | 122425580                                                                                                                                             | N-Term(iTRAQ4plex), Q1(Deamidated)                 | 1265.59563 | 45 | 54 |  | 4.13 | Expt1 |
| TMTGLDTPVLMVIK      | 5  | 194328704;194328702;194328706;18700026;194328708                                                                                                      | N-Term(iTRAQ4plex), K14(iTRAQ4plex)                | 1807.03850 | 45 | 90 |  | 4.28 | Expt1 |
| ALLFIPR             | 23 | 40556608                                                                                                                                              | N-Term(iTRAQ4plex)                                 | 973.63365  | 45 | 35 |  | 2.99 | Expt1 |
| VINDFVEK            | 3  | 6678085;6678083;76881807;6678079;6678087                                                                                                              | N-Term(iTRAQ4plex), K8(iTRAQ4plex)                 | 1251.72820 | 45 | 53 |  | 3.05 | Expt1 |
| CLTTIVK             | 5  | 124517663                                                                                                                                             | N-Term(iTRAQ4plex), C1(Methylthio), K7(iTRAQ4plex) | 1111.64385 | 45 | 55 |  |      | Expt1 |
| GGYIGSTYFER         | 5  | 21704162;270309117                                                                                                                                    | N-Term(iTRAQ4plex)                                 | 1393.68535 | 45 | 47 |  | 2.87 | Expt1 |
| MEGFIVNR            | 23 | 13385466                                                                                                                                              | N-Term(iTRAQ4plex)                                 | 1109.58928 | 45 | 44 |  | 3.02 | Expt1 |
| IYSPTVGDPIDEYTTVPGR | 3  | 111074529                                                                                                                                             | N-Term(iTRAQ4plex), Y14(iTRAQ4plex)                | 2481.30704 | 45 | 42 |  | 4.30 | Expt1 |
| LSIVPVR             | 13 | 82890069;149253083;82898647;94383782;94383784;149259263;63594466;149263154;149265803;94401827;94402540;94404463                                       | N-Term(iTRAQ4plex)                                 | 927.61156  | 45 | 33 |  |      | Expt1 |

|                                     |    |                                                                                   |                                                     |            |    |    |  |      |       |
|-------------------------------------|----|-----------------------------------------------------------------------------------|-----------------------------------------------------|------------|----|----|--|------|-------|
| DSTLIMQLLR                          | 44 | 226874906;31543976;149251472;149263879;134023662;6756037;6756041;6756039;31543974 | N-Term(iTRAQ4plex), M6(Oxidation)                   | 1349.76056 | 45 | 48 |  | 4.01 | Expt1 |
| EESYDLILSR                          | 3  | 160298217                                                                         | N-Term(iTRAQ4plex)                                  | 1368.71514 | 45 | 43 |  | 3.67 | Expt1 |
| MATEVAADALGEEWK                     | 4  | 94367038;82885362;149258986;149265796;149271678                                   | N-Term(iTRAQ4plex), K15(iTRAQ4plex)                 | 1908.96695 | 45 | 47 |  | 3.15 | Expt1 |
| SDLLMPR                             | 2  | 6724311                                                                           | N-Term(iTRAQ4plex)                                  | 975.53978  | 45 | 36 |  |      | Expt1 |
| AVTGYNDPETGNIISLFQAMNK              | 5  | 82950147;82950149;149264086                                                       | N-Term(iTRAQ4plex), M20(Oxidation), K22(iTRAQ4plex) | 2687.36863 | 45 | 88 |  | 4.62 | Expt1 |
| ELQVGIPVTDEAGQR                     | 6  | 16716499                                                                          | N-Term(iTRAQ4plex)                                  | 1755.93682 | 45 | 58 |  | 3.33 | Expt1 |
| SLMDEVVK                            | 3  | 70778976                                                                          | N-Term(iTRAQ4plex), K8(iTRAQ4plex)                  | 1208.67656 | 45 | 54 |  | 3.27 | Expt1 |
| VLSTPDLEVR                          | 2  | 15426055                                                                          | N-Term(iTRAQ4plex)                                  | 1272.72905 | 45 | 41 |  |      | Expt1 |
| DAAQSSPAFGDR                        | 6  | 149252624;34328485                                                                | N-Term(iTRAQ4plex)                                  | 1365.65361 | 45 | 70 |  | 3.43 | Expt1 |
| LNQGVVEFASYGDLK                     | 2  | 82895195;119226243                                                                | N-Term(iTRAQ4plex), K15(iTRAQ4plex)                 | 1929.03366 | 45 |    |  | 4.71 | Expt1 |
| ISMNNPSQEISDSSTPIFR                 | 5  | 236466498                                                                         | N-Term(iTRAQ4plex)                                  | 2380.20244 | 45 | 59 |  | 3.82 | Expt1 |
| DVFSCNVGNLQPGAK                     | 5  | 225543183                                                                         | N-Term(iTRAQ4plex), C5(Methylthio), K15(iTRAQ4plex) | 1882.94034 | 45 | 57 |  | 4.39 | Expt1 |
| NPFLAAVTNTR                         | 5  | 6679421                                                                           | N-Term(iTRAQ4plex)                                  | 1347.75408 | 45 | 48 |  | 2.88 | Expt1 |
| DWNVDLIPK                           | 2  | 116089273;33859560                                                                | N-Term(iTRAQ4plex), K9(iTRAQ4plex)                  | 1387.78240 | 45 | 46 |  |      | Expt1 |
| TFDAIVMDPK                          | 4  | 86198316                                                                          | N-Term(iTRAQ4plex), K10(iTRAQ4plex)                 | 1424.77263 | 45 | 39 |  | 3.15 | Expt1 |
| AGVIFPVGR                           | 12 | 46250738;41152517;283945572;283945575;283945579                                   | N-Term(iTRAQ4plex)                                  | 1059.64519 | 45 | 38 |  | 3.41 | Expt1 |
| MNLSAIQDR                           | 4  | 13385518;23956194                                                                 | N-Term(iTRAQ4plex)                                  | 1191.62834 | 45 | 42 |  | 3.24 | Expt1 |
| AVVIVDDR                            | 21 | 149252953;23956214;255958247                                                      | N-Term(iTRAQ4plex)                                  | 1030.59892 | 45 | 59 |  | 3.24 | Expt1 |
| VEGSEPTFPNFIGLNPNK                  | 8  | 84875537                                                                          | N-Term(iTRAQ4plex), K21(iTRAQ4plex)                 | 2576.36698 | 45 | 57 |  | 3.85 | Expt1 |
| SLEDQVETLR                          | 8  | 6679465                                                                           | N-Term(iTRAQ4plex)                                  | 1333.71147 | 45 | 51 |  | 3.76 | Expt1 |
| DLVDDLK                             | 3  | 6753060                                                                           | N-Term(iTRAQ4plex), K7(iTRAQ4plex)                  | 1105.64421 | 45 | 44 |  | 3.00 | Expt1 |
| YVMTTTTLER                          | 3  | 13385624                                                                          | N-Term(iTRAQ4plex)                                  | 1358.71294 | 45 | 42 |  | 2.92 | Expt1 |
| QEVNIPAGETSTR                       | 7  | 115647999                                                                         | N-Term(iTRAQ4plex)                                  | 1545.79949 | 45 | 54 |  | 3.84 | Expt1 |
| WSPDIPACAR                          | 2  | 160358825                                                                         | N-Term(iTRAQ4plex), C8(Methylthio)                  | 1305.62004 | 45 |    |  | 2.95 | Expt1 |
| SLGQNPTAEALQGMVNEIKDNGTVDFPEFLTMMSR | 3  | 13386230                                                                          | N-Term(iTRAQ4plex), M14(Oxidation), K20(iTRAQ4plex) | 4375.08608 | 45 | 44 |  | 6.04 | Expt1 |
| TLSGMESYCVR                         | 5  | 6753322                                                                           | N-Term(iTRAQ4plex), C9(Methylthio)                  | 1435.65141 | 45 | 45 |  | 4.12 | Expt1 |
| VVNYSMVSRLR                         | 3  | 113680352                                                                         | N-Term(iTRAQ4plex)                                  | 1334.76177 | 45 | 42 |  | 2.97 | Expt1 |
| AQIWDTAGQER                         | 10 | 31980840;6679583                                                                  | N-Term(iTRAQ4plex)                                  | 1418.71745 | 45 | 41 |  | 3.11 | Expt1 |
| YPDIAELLR                           | 6  | 161016833                                                                         | N-Term(iTRAQ4plex)                                  | 1346.78337 | 45 | 48 |  | 3.59 | Expt1 |
| EVCGFAPYER                          | 11 | 149262233;149249185;82894566;82898629;94385943;149262863                          | N-Term(iTRAQ4plex), C3(Methylthio)                  | 1360.61528 | 45 | 36 |  | 3.65 | Expt1 |
| ADQIETQQLMR                         | 8  | 215983062;7106303                                                                 | N-Term(iTRAQ4plex)                                  | 1476.76262 | 45 | 63 |  | 3.51 | Expt1 |
| FSQQLDGR                            | 24 | 148277039                                                                         | N-Term(iTRAQ4plex)                                  | 1094.57141 | 45 | 49 |  | 3.31 | Expt1 |
| ELGTVMR                             | 2  | 6753244;149255253;149255689;6678371                                               | N-Term(iTRAQ4plex)                                  | 949.52580  | 45 | 43 |  |      | Expt1 |
| TLDVNQDSELR                         | 7  | 6677835                                                                           | N-Term(iTRAQ4plex)                                  | 1433.73650 | 45 | 66 |  | 3.38 | Expt1 |
| DDITFVSGAPR                         | 3  | 31982236                                                                          | N-Term(iTRAQ4plex)                                  | 1321.68901 | 45 | 50 |  | 3.84 | Expt1 |
| VLANPGENSQVAR                       | 5  | 88014720                                                                          | N-Term(iTRAQ4plex)                                  | 1369.77129 | 45 | 48 |  | 3.22 | Expt1 |
| FLVGPDGIPVMR                        | 2  | 171543846;145275179;15011841                                                      | N-Term(iTRAQ4plex), M11(Oxidation)                  | 1460.80754 | 45 |    |  | 2.92 | Expt1 |
| CEGINISGNFYR                        | 7  | 31981945                                                                          | N-Term(iTRAQ4plex), C1(Methylthio)                  | 1562.72405 | 45 | 53 |  | 4.03 | Expt1 |
| VEGPAFTDAIR                         | 10 | 22122641                                                                          | N-Term(iTRAQ4plex)                                  | 1319.70903 | 45 | 57 |  | 3.87 | Expt1 |
| MSVQPTVSLGGFEITPPVVLRL              | 3  | 149251776;94385641;94388148;6679108                                               | N-Term(iTRAQ4plex)                                  | 2371.32566 | 45 | 49 |  | 3.93 | Expt1 |
| VGAEDADGIDMAYR                      | 3  | 34610207                                                                          | N-Term(iTRAQ4plex)                                  | 1626.75737 | 45 | 51 |  | 4.17 | Expt1 |
| LQQLPADFGR                          | 2  | 19527026                                                                          | N-Term(iTRAQ4plex)                                  | 1288.71550 | 45 |    |  |      | Expt1 |
| LSESVLSPPCFVR                       | 3  | 154146209                                                                         | N-Term(iTRAQ4plex), C10(Methylthio)                 | 1623.83721 | 45 | 50 |  | 3.93 | Expt1 |
| GLLLYGPPGTGK                        | 8  | 225543319;94408011;21313044;254553468;254553470                                   | N-Term(iTRAQ4plex), K12(iTRAQ4plex)                 | 1460.87456 | 45 | 46 |  | 3.82 | Expt1 |
| YIVNVYQISEEGK                       | 5  | 46849812                                                                          | N-Term(iTRAQ4plex), K13(iTRAQ4plex)                 | 1829.99224 | 45 | 94 |  | 4.13 | Expt1 |
| VDLQEINNWWQAQMK                     | 3  | 117606335                                                                         | N-Term(iTRAQ4plex), M14(Oxidation), K15(iTRAQ4plex) | 2120.11356 | 45 | 63 |  | 5.29 | Expt1 |

|                                     |    |                                                 |                                                                       |            |    |    |      |       |
|-------------------------------------|----|-------------------------------------------------|-----------------------------------------------------------------------|------------|----|----|------|-------|
| QFAEENGLFLLEASAK                    | 4  | 18390323                                        | N-Term(iTRAQ4plex), N6(Deamidated), K16(iTRAQ4plex)                   | 2056.08725 | 45 | 57 | 4.37 | Expt1 |
| EAFQLFDR                            | 14 | 33620739;149252094;149252164;94383790;149265610 | N-Term(iTRAQ4plex)                                                    | 1169.60979 | 45 | 55 | 3.61 | Expt1 |
| EAYPEEAYIADLDAK                     | 7  | 29293809                                        | N-Term(iTRAQ4plex), K15(iTRAQ4plex)                                   | 1985.99907 | 45 | 74 | 4.37 | Expt1 |
| VISFEEQVASIR                        | 3  | 6753490                                         | N-Term(iTRAQ4plex)                                                    | 1521.84050 | 45 | 53 | 4.58 | Expt1 |
| LWDLTTGTTTR                         | 9  | 6680047                                         | N-Term(iTRAQ4plex)                                                    | 1408.75688 | 45 | 48 | 3.46 | Expt1 |
| LAVEAVLR                            | 17 | 126521835                                       | N-Term(iTRAQ4plex)                                                    | 1014.64488 | 45 | 42 | 3.27 | Expt1 |
| ESLQQLAEVTR                         | 7  | 6679465                                         | N-Term(iTRAQ4plex)                                                    | 1417.77837 | 45 | 54 | 3.83 | Expt1 |
| FGFAIGSQTAR                         | 3  | 71480098                                        | N-Term(iTRAQ4plex)                                                    | 1298.69646 | 45 | 36 | 3.10 | Expt1 |
| FGIMSDQIIGR                         | 3  | 21311873                                        | N-Term(iTRAQ4plex)                                                    | 1451.78508 | 45 | 51 | 3.22 | Expt1 |
| LAIWDTAGQER                         | 2  | 30841008                                        | N-Term(iTRAQ4plex)                                                    | 1403.74028 | 45 | 40 |      | Expt1 |
| CEQTLAVQAHYILNDEAVLER               | 4  | 148277039                                       | N-Term(iTRAQ4plex), C1(Methylthio)                                    | 2605.29929 | 45 |    | 3.65 | Expt1 |
| ETIDAVPNAIPGR                       | 3  | 194328715;194328717;6756051;194328719           | N-Term(iTRAQ4plex)                                                    | 1496.82036 | 45 | 48 | 4.00 | Expt1 |
| LPEDDEPPARPPAPAGASPLAEPAAAPPSTPAAPK | 2  | 34610241;34610235;34610233                      | N-Term(iTRAQ4plex), K34(iTRAQ4plex)                                   | 3570.87783 | 45 |    | 4.22 | Expt1 |
| FGYQFTQQGPR                         | 3  | 8394460                                         | N-Term(iTRAQ4plex)                                                    | 1472.74187 | 44 | 49 | 3.50 | Expt1 |
| MDLLEEQVAGAVR                       | 6  | 19527130                                        | N-Term(iTRAQ4plex)                                                    | 1574.83208 | 44 | 58 | 3.82 | Expt1 |
| SGEEDFESLASQFSDCSSAK                | 8  | 85702071;12963653                               | N-Term(iTRAQ4plex), C16(Methylthio), K20(iTRAQ4plex)                  | 2458.07517 | 44 | 64 | 5.12 | Expt1 |
| LNMDLDR                             | 4  | 100815493                                       | N-Term(iTRAQ4plex), N2(Deamidated)                                    | 1021.51294 | 44 | 51 |      | Expt1 |
| YDGIIPLGK                           | 5  | 13385408;149251925;94386148;38082564;149269674  | N-Term(iTRAQ4plex), K9(iTRAQ4plex)                                    | 1263.76323 | 44 | 47 | 3.06 | Expt1 |
| AYLQQLR                             | 8  | 9790141                                         | N-Term(iTRAQ4plex)                                                    | 1035.60576 | 44 | 36 | 3.02 | Expt1 |
| EDITQLR                             | 4  | 33859520                                        | N-Term(iTRAQ4plex), Q5(Deamidated)                                    | 1019.55071 | 44 |    | 2.82 | Expt1 |
| EDLTEIR                             | 4  | 94369748;94383772;6671569                       | N-Term(iTRAQ4plex)                                                    | 1019.55071 | 44 |    | 2.82 | Expt1 |
| GIGFAITR                            | 11 | 82975294;27413160;113680352                     | N-Term(iTRAQ4plex)                                                    | 978.58495  | 44 | 46 | 3.08 | Expt1 |
| ALELDSNLYR                          | 6  | 114326446                                       | N-Term(iTRAQ4plex)                                                    | 1337.71916 | 44 | 41 | 4.05 | Expt1 |
| AEYEFDSPYWDIDISDAK                  | 4  | 19527140;79750129                               | N-Term(iTRAQ4plex), K18(iTRAQ4plex)                                   | 2426.10166 | 44 | 47 | 3.42 | Expt1 |
| LIADVAPSAIR                         | 4  | 46048490                                        | N-Term(iTRAQ4plex)                                                    | 1269.76775 | 44 | 36 | 3.09 | Expt1 |
| LGELVLGPDYDNTVLEELR                 | 3  | 111074529                                       | N-Term(iTRAQ4plex), Y9(iTRAQ4plex)                                    | 2417.35672 | 44 |    | 3.48 | Expt1 |
| QVVNIPSFIVR                         | 17 | 33504483                                        | N-Term(iTRAQ4plex)                                                    | 1415.85283 | 44 | 46 | 3.91 | Expt1 |
| DLPSPIER                            | 6  | 149263750                                       | N-Term(iTRAQ4plex)                                                    | 1070.59758 | 44 | 33 |      | Expt1 |
| LAVEALVR                            | 3  | 6680169                                         | N-Term(iTRAQ4plex)                                                    | 1014.64421 | 44 |    |      | Expt1 |
| SGSGTMNLGGSLTR                      | 10 | 6753262;83649737                                | N-Term(iTRAQ4plex)                                                    | 1481.75139 | 44 | 68 | 4.34 | Expt1 |
| TLLVADPR                            | 10 | 149254484;149262347                             | N-Term(iTRAQ4plex)                                                    | 1028.62370 | 44 | 51 | 2.92 | Expt1 |
| DQLQTFSEEHPVLLTEAPLNPR              | 3  | 8392847                                         | N-Term(iTRAQ4plex)                                                    | 2678.40049 | 44 | 45 | 4.89 | Expt1 |
| LLLEGVENK                           | 2  | 31560705                                        | N-Term(iTRAQ4plex), K9(iTRAQ4plex)                                    | 1302.79668 | 44 |    | 3.07 | Expt1 |
| VTVDVNEAR                           | 5  | 6678499                                         | N-Term(iTRAQ4plex)                                                    | 1245.69219 | 44 | 48 | 3.72 | Expt1 |
| AQLNELVNTNGR                        | 21 | 111185907                                       | N-Term(iTRAQ4plex), N10(Deamidated)                                   | 1473.77800 | 44 | 64 | 4.35 | Expt1 |
| EMFPYEASTPTGISASCR                  | 8  | 121949767;121949763;121949765;121949769         | N-Term(iTRAQ4plex), C17(Methylthio)                                   | 2136.95439 | 44 | 68 | 4.13 | Expt1 |
| AINQGGLTSVAVR                       | 11 | 6755198                                         | N-Term(iTRAQ4plex)                                                    | 1429.82585 | 44 | 67 | 4.43 | Expt1 |
| LYYFNGR                             | 34 | 160298217                                       | N-Term(iTRAQ4plex), N5(Deamidated)                                    | 1077.55071 | 44 | 45 | 3.00 | Expt1 |
| DLEALMLDR                           | 5  | 227330633                                       | N-Term(iTRAQ4plex)                                                    | 1219.65044 | 44 | 41 | 3.23 | Expt1 |
| NLNPIFNETLR                         | 4  | 158937304                                       | N-Term(iTRAQ4plex)                                                    | 1474.81645 | 44 | 48 | 3.40 | Expt1 |
| EFSPFGTITSAK                        | 3  | 31560656;255652857                              | N-Term(iTRAQ4plex), K12(iTRAQ4plex)                                   | 1572.86089 | 44 | 74 | 4.00 | Expt1 |
| NPPGFAFVEFEDPR                      | 18 | 8567402;149251459;149266618;22122585            | N-Term(iTRAQ4plex)                                                    | 1765.87102 | 44 | 50 | 4.38 | Expt1 |
| LEPSGPISTINPCPPCK                   | 5  | 149263750                                       | N-Term(iTRAQ4plex), C13(Methylthio), C16(Methylthio), K17(iTRAQ4plex) | 2133.05436 | 44 | 41 | 4.21 | Expt1 |
| GADQEPLNWWFIER                      | 13 | 133778947                                       | N-Term(iTRAQ4plex)                                                    | 1865.93364 | 44 | 91 | 4.46 | Expt1 |
| IGFPWSEIR                           | 4  | 149266483;157277952;70778915;157277948          | N-Term(iTRAQ4plex)                                                    | 1248.69158 | 44 | 44 |      | Expt1 |
| ESYPVFYFLR                          | 7  | 19526463                                        | N-Term(iTRAQ4plex)                                                    | 1464.77092 | 44 | 44 | 3.52 | Expt1 |
| ITQSSLTICFPEYTGANK                  | 5  | 149260278;41054806                              | N-Term(iTRAQ4plex), C9(Methylthio), K18(iTRAQ4plex)                   | 2307.16605 | 44 | 75 | 4.71 | Expt1 |
| GLTGPPIGPPGAGANGEK                  | 65 | 166064040;169658375                             | N-Term(iTRAQ4plex), N15(Deamidated), K18(iTRAQ4plex)                  | 1879.01518 | 44 | 44 | 4.89 | Expt1 |
| LFLAGYDPTPTMR                       | 2  | 19526826;164518904                              | N-Term(iTRAQ4plex), M12(Oxidation)                                    | 1641.84502 | 44 | 37 |      | Expt1 |

|                        |    |                                                                 |                                                                    |            |    |     |      |      |       |
|------------------------|----|-----------------------------------------------------------------|--------------------------------------------------------------------|------------|----|-----|------|------|-------|
| LGSTAPOVLNTSSPAQAENEAK | 5  | 38198665                                                        | N-Term(iTRAQ4plex), K23(iTRAQ4plex)                                | 2629.37162 | 44 | 101 |      | 5.07 | Expt1 |
| LGPGLDPVEVYESLPEELQK   | 7  | 7949018                                                         | N-Term(iTRAQ4plex), K21(iTRAQ4plex)                                | 2557.37285 | 44 | 63  |      | 4.17 | Expt1 |
| VVMVNGTPMEDVLSFAVQQLR  | 2  | 160333863                                                       | N-Term(iTRAQ4plex), N5(Deamidated)                                 | 2615.35398 | 44 |     |      | 3.67 | Expt1 |
| QYPLVTPNEER            | 1  | 29789080                                                        | N-Term(iTRAQ4plex)                                                 | 1489.77959 | 44 |     |      |      | Expt1 |
| VFLQYLPAIR             | 3  | 89001109                                                        | N-Term(iTRAQ4plex)                                                 | 1363.82060 | 44 | 38  |      | 3.43 | Expt1 |
| DTIQVYSQR              | 4  | 194328702;194328706;18700026;194328708                          | N-Term(iTRAQ4plex)                                                 | 1218.65911 | 44 |     |      | 3.74 | Expt1 |
| MLLIENLR               | 2  | 110735428;110735426                                             | N-Term(iTRAQ4plex)                                                 | 1145.68401 | 44 |     |      | 2.84 | Expt1 |
| AVGPSSTQLYVMVR         | 5  | 164698474;84370256                                              | N-Term(iTRAQ4plex)                                                 | 1552.83196 | 44 | 62  |      | 4.14 | Expt1 |
| SCAHDVWYE              | 1  | 94375800;6679078                                                | N-Term(iTRAQ4plex), C2(Methylthio)                                 | 1299.52532 | 44 |     |      |      | Expt1 |
| GSGIGSNEAP             | 10 | 160333881                                                       | N-Term(iTRAQ4plex)                                                 | 1032.51006 | 44 | 72  |      | 2.94 | Expt1 |
| AQQIQALQSNVR           | 5  | 33563252;167555029                                              | N-Term(iTRAQ4plex)                                                 | 1499.84294 | 44 | 64  |      | 3.74 | Expt1 |
| AFLEVLAK               | 25 | 111074529                                                       | N-Term(iTRAQ4plex), K8(iTRAQ4plex)                                 | 1178.73747 | 44 | 67  |      | 3.51 | Expt1 |
| TDLEMQIEQLNEELAYLK     | 9  | 226823220                                                       | N-Term(iTRAQ4plex), M5(Oxidation), K18(iTRAQ4plex)                 | 2484.28598 | 44 | 67  | 1.17 | 5.19 | Expt1 |
| GLGDCLVK               | 3  | 63475897;82880803;94405790;22094075                             | N-Term(iTRAQ4plex), C5(Methylthio), K8(iTRAQ4plex)                 | 1138.61345 | 44 | 46  |      | 3.33 | Expt1 |
| ESIIDVEGVVR            | 7  | 211065507                                                       | N-Term(iTRAQ4plex)                                                 | 1359.76067 | 44 | 61  |      | 3.90 | Expt1 |
| SFLDLLNATGK            | 6  | 25141235;6753620;14861844                                       | N-Term(iTRAQ4plex), K12(iTRAQ4plex)                                | 1579.93613 | 44 | 61  |      | 3.42 | Expt1 |
| NIPEDAADMAR            | 4  | 149234067                                                       | N-Term(iTRAQ4plex)                                                 | 1346.65056 | 44 | 49  |      | 3.17 | Expt1 |
| NFDEILR                | 8  | 28916703;6671549                                                | N-Term(iTRAQ4plex)                                                 | 1050.57312 | 44 | 44  |      | 2.94 | Expt1 |
| DASDDLDDLNFNQK         | 3  | 149258752;14149756                                              | N-Term(iTRAQ4plex), K15(iTRAQ4plex)                                | 2044.97759 | 44 | 103 |      | 4.60 | Expt1 |
| GIVVYTGDR              | 3  | 21450277                                                        | N-Term(iTRAQ4plex)                                                 | 1123.62334 | 44 |     |      | 3.12 | Expt1 |
| IITLAGPTNAIFK          | 18 | 157042772;157041229;157057549                                   | N-Term(iTRAQ4plex), K13(iTRAQ4plex)                                | 1647.01714 | 44 | 76  |      | 4.33 | Expt1 |
| GAVGALLVYDIAK          | 15 | 31980840;6679583                                                | N-Term(iTRAQ4plex), K13(iTRAQ4plex)                                | 1577.95854 | 44 | 78  | 1.47 | 4.59 | Expt1 |
| FTGVITQGR              | 13 | 160707889;229092758                                             | N-Term(iTRAQ4plex)                                                 | 1122.63933 | 44 | 47  |      | 3.65 | Expt1 |
| GLEAEVLR               | 5  | 29336026                                                        | N-Term(iTRAQ4plex)                                                 | 1030.60283 | 44 | 40  |      | 3.46 | Expt1 |
| GIVNEQFLLQR            | 8  | 23956084                                                        | N-Term(iTRAQ4plex)                                                 | 1460.83672 | 44 | 56  |      | 3.47 | Expt1 |
| TVFDEAIR               | 8  | 18875380;45592934;6679601                                       | N-Term(iTRAQ4plex)                                                 | 1094.59636 | 44 | 38  |      | 3.27 | Expt1 |
| ELLREPEVR              | 10 | 50053999                                                        | N-Term(iTRAQ4plex)                                                 | 1284.72734 | 44 | 39  |      |      | Expt1 |
| DIELVMAQANVTR          | 2  | 126116574                                                       | N-Term(iTRAQ4plex), M6(Oxidation), Q8(Deamidated), N10(Deamidated) | 1621.83769 | 44 |     |      |      | Expt1 |
| DNNQFASALDR            | 4  | 29789080                                                        | N-Term(iTRAQ4plex)                                                 | 1481.71172 | 44 | 64  |      | 4.38 | Expt1 |
| NILDNCPFR              | 30 | 6755781                                                         | N-Term(iTRAQ4plex), C6(Methylthio)                                 | 1134.55156 | 44 | 42  |      | 3.39 | Expt1 |
| AMNGESLDGR             | 9  | 149234330;37497112;261862339                                    | N-Term(iTRAQ4plex), N3(Deamidated)                                 | 1194.55705 | 44 | 57  |      | 2.87 | Expt1 |
| TSFSSVSR               | 16 | 20911031                                                        | N-Term(iTRAQ4plex)                                                 | 1014.53558 | 44 | 55  |      | 3.06 | Expt1 |
| TLIEILATR              | 14 | 31981302;158966670                                              | N-Term(iTRAQ4plex)                                                 | 1173.73454 | 44 | 47  |      | 3.38 | Expt1 |
| GQAGVMGFPGPK           | 36 | 34328108                                                        | N-Term(iTRAQ4plex), M6(Oxidation), K12(iTRAQ4plex)                 | 1449.77385 | 44 | 50  |      | 3.66 | Expt1 |
| IPDQLVLDMK             | 5  | 21312062                                                        | N-Term(iTRAQ4plex), K11(iTRAQ4plex)                                | 1572.93985 | 44 | 36  |      | 3.20 | Expt1 |
| LTVHSCPEDEAQ           | 6  | 108860695;82913885;82950935;82950919;38074891;82951729;83014973 | N-Term(iTRAQ4plex), C6(Methylthio)                                 | 1605.67986 | 44 | 51  |      | 3.20 | Expt1 |
| DPETGFYMLQLAGK         | 7  | 37537522                                                        | N-Term(iTRAQ4plex), K14(iTRAQ4plex)                                | 1857.97319 | 44 | 86  |      | 4.06 | Expt1 |
| FPAAQAPDPNEIPK         | 7  | 157057145;157057174;157057554                                   | N-Term(iTRAQ4plex), K14(iTRAQ4plex)                                | 1782.96782 | 44 | 63  |      | 3.87 | Expt1 |
| TVSAVLQFGNIVLK         | 5  | 29336026                                                        | N-Term(iTRAQ4plex), K14(iTRAQ4plex)                                | 1777.08762 | 44 | 55  |      | 3.88 | Expt1 |
| GEDVDQLITCIQSK         | 3  | 88758582;88758584                                               | N-Term(iTRAQ4plex), C10(Methylthio), K14(iTRAQ4plex)               | 1882.95957 | 44 | 53  |      | 3.91 | Expt1 |
| TPQISMSDIDLNVK         | 3  | 61743961                                                        | N-Term(iTRAQ4plex), K14(iTRAQ4plex)                                | 1849.00412 | 44 | 50  |      | 3.75 | Expt1 |
| TLTPAAQMEGFLNR         | 11 | 117938332                                                       | N-Term(iTRAQ4plex)                                                 | 1821.93180 | 44 | 46  |      | 4.30 | Expt1 |
| VIVVITDGR              | 13 | 226423922                                                       | N-Term(iTRAQ4plex)                                                 | 1115.69243 | 44 | 50  |      | 3.13 | Expt1 |
| SSEIEQAVQSLDR          | 5  | 21312654                                                        | N-Term(iTRAQ4plex)                                                 | 1605.82488 | 44 | 60  |      | 3.95 | Expt1 |
| GDFCIQVGR              | 18 | 94375800;149262292;149274354;6679078                            | N-Term(iTRAQ4plex), C4(Methylthio)                                 | 1184.56780 | 44 | 54  |      | 3.38 | Expt1 |
| GDPGYEGER              | 4  | 6753484                                                         | N-Term(iTRAQ4plex)                                                 | 1123.51470 | 44 | 43  |      | 2.87 | Expt1 |
| NIDYPPVDLEISR          | 5  | 6678493                                                         | N-Term(iTRAQ4plex)                                                 | 1577.83318 | 44 | 67  |      | 3.48 | Expt1 |
| TPFLLVGTQIDLR          | 5  | 6753364                                                         | N-Term(iTRAQ4plex)                                                 | 1616.95328 | 44 | 63  |      | 3.30 | Expt1 |
| SEAVVEYVFSGR           | 3  | 77404392                                                        | N-Term(iTRAQ4plex)                                                 | 1573.80132 | 44 | 62  |      | 3.66 | Expt1 |



|                                 |    |                                                                                                          |                                                     |            |    |     |      |      |       |
|---------------------------------|----|----------------------------------------------------------------------------------------------------------|-----------------------------------------------------|------------|----|-----|------|------|-------|
| LIEVDDER                        | 7  | 94367038;82885362;14926579<br>6;82955311;149271678                                                       | N-Term(iTRAQ4plex)                                  | 1132.59844 | 44 | 42  |      | 3.12 | Expt1 |
| YSILEQSPSPMLFTHMPSTGVITTTSAQLDR | 4  | 7305007                                                                                                  | N-Term(iTRAQ4plex)                                  | 3649.84055 | 43 | 46  |      | 3.24 | Expt1 |
| AGGSASAMLQPLLDNQVGFK            | 3  | 7242197                                                                                                  | N-Term(iTRAQ4plex), M8(Oxidation), K20(iTRAQ4plex)  | 2308.22531 | 43 | 42  |      | 4.53 | Expt1 |
| NWNTTFYEGTWR                    | 6  | 16033229                                                                                                 | N-Term(iTRAQ4plex)                                  | 1718.81035 | 43 | 69  |      | 3.84 | Expt1 |
| ELEFYLR                         | 9  | 149257598;82922494;2849153<br>1;149264053                                                                | N-Term(iTRAQ4plex)                                  | 1113.60820 | 43 |     |      | 3.08 | Expt1 |
| NLQEAEEWYK                      | 3  | 31982755;254675335;2546753<br>37;254675339                                                               | N-Term(iTRAQ4plex), K10(iTRAQ4plex)                 | 1597.82549 | 43 | 48  |      | 4.30 | Expt1 |
| FNVWDTAGQEK                     | 4  | 149260287;124487358;667767<br>7                                                                          | N-Term(iTRAQ4plex), K11(iTRAQ4plex)                 | 1582.81230 | 43 | 50  |      | 3.42 | Expt1 |
| EMFEDTVEER                      | 4  | 157909799                                                                                                | N-Term(iTRAQ4plex)                                  | 1428.64482 | 43 | 39  |      | 3.36 | Expt1 |
| LCAIPNLR                        | 4  | 163310765                                                                                                | N-Term(iTRAQ4plex), C2(Methylthio)                  | 1089.60747 | 43 |     |      | 2.88 | Expt1 |
| ELAENINAVTLLR                   | 3  | 20127150                                                                                                 | N-Term(iTRAQ4plex)                                  | 1599.92436 | 43 | 46  |      | 3.98 | Expt1 |
| NFITQGPYENR                     | 4  | 19527064;19705578                                                                                        | N-Term(iTRAQ4plex)                                  | 1482.74858 | 43 | 39  |      | 3.24 | Expt1 |
| DVMPEVNR                        | 2  | 94380203                                                                                                 | N-Term(iTRAQ4plex)                                  | 1103.56206 | 43 | 34  |      |      | Expt1 |
| GVQGGPPGAPGR                    | 12 | 34328108                                                                                                 | N-Term(iTRAQ4plex)                                  | 1233.67929 | 43 | 50  |      | 4.82 | Expt1 |
| EVVEFYR                         | 2  | 111185907                                                                                                | N-Term(iTRAQ4plex)                                  | 1085.57561 | 43 |     |      |      | Expt1 |
| VTQSNFAVGYK                     | 3  | 6755963                                                                                                  | N-Term(iTRAQ4plex), K11(iTRAQ4plex)                 | 1501.83098 | 43 | 71  |      | 4.61 | Expt1 |
| ALITFAGMIPYR                    | 3  | 149272563;27369533                                                                                       | N-Term(iTRAQ4plex)                                  | 1496.84526 | 43 | 42  |      | 3.79 | Expt1 |
| DGDGSIITQELGTVMR                | 9  | 13386230                                                                                                 | N-Term(iTRAQ4plex), M15(Oxidation)                  | 1839.89055 | 43 | 63  |      | 3.74 | Expt1 |
| DNYVPEVSALDQIEIIVDPDTK          | 4  | 149261626;149261791;667780<br>1                                                                          | N-Term(iTRAQ4plex), K22(iTRAQ4plex)                 | 2777.41404 | 43 | 49  |      | 3.41 | Expt1 |
| NQGLDGLFR                       | 4  | 70909345                                                                                                 | N-Term(iTRAQ4plex)                                  | 1163.63103 | 43 | 36  |      | 2.90 | Expt1 |
| LSEELSGGR                       | 2  | 23956222                                                                                                 | N-Term(iTRAQ4plex)                                  | 1091.58306 | 43 |     |      | 3.33 | Expt1 |
| LSQELSGGR                       | 2  | 52345394                                                                                                 | N-Term(iTRAQ4plex), Q3(Deamidated)                  | 1091.58306 | 43 |     |      | 3.33 | Expt1 |
| IQLLDLPGIIEGAK                  | 3  | 6681225                                                                                                  | N-Term(iTRAQ4plex), K14(iTRAQ4plex)                 | 1768.08689 | 43 | 47  |      | 3.61 | Expt1 |
| AAESLADPTEYENLFPGLK             | 7  | 29789080                                                                                                 | N-Term(iTRAQ4plex), K19(iTRAQ4plex)                 | 2353.22037 | 43 | 65  |      | 4.76 | Expt1 |
| AFPWADTISILSR                   | 4  | 19527258                                                                                                 | N-Term(iTRAQ4plex)                                  | 1578.84429 | 43 | 47  |      | 3.80 | Expt1 |
| AQNTWCGCSILSR                   | 3  | 9506843;162287370;16176066<br>7                                                                          | N-Term(iTRAQ4plex), C7(Methylthio)                  | 1469.67534 | 43 | 51  |      | 4.38 | Expt1 |
| IQTQPGYANTLR                    | 18 | 149258501;19526818                                                                                       | N-Term(iTRAQ4plex)                                  | 1505.82073 | 43 | 67  |      | 3.94 | Expt1 |
| FVIATSTK                        | 5  | 82880886;149261044;9440598<br>2;149270558;149270560;14927<br>4983;84662736                               | N-Term(iTRAQ4plex), K8(iTRAQ4plex)                  | 1154.71294 | 43 | 50  |      | 2.98 | Expt1 |
| VTSAVEALLSADSASR                | 7  | 7305619                                                                                                  | N-Term(iTRAQ4plex)                                  | 1720.92583 | 43 | 99  |      | 4.26 | Expt1 |
| FSPSYQAVEYMR                    | 2  | 54292135                                                                                                 | N-Term(iTRAQ4plex)                                  | 1647.83647 | 43 | 58  |      |      | Expt1 |
| QQGSPPGVQLDVPQSLNPEVLLK         | 5  | 23943828                                                                                                 | N-Term(iTRAQ4plex), K25(iTRAQ4plex)                 | 2899.61734 | 43 | 73  |      | 5.22 | Expt1 |
| LGNYVGVAVQDCER                  | 3  | 21313588                                                                                                 | N-Term(iTRAQ4plex), C11(Methylthio)                 | 1613.75688 | 43 | 43  |      | 4.13 | Expt1 |
| LLLAAR                          | 45 | 149251929;63514363;8290544<br>3;51766344;149264394;517704<br>20;82994829;149270876;91932<br>791;10946684 | N-Term(iTRAQ4plex)                                  | 800.55046  | 43 | 39  |      |      | Expt1 |
| GLFIIDPNGVVK                    | 4  | 6680690                                                                                                  | N-Term(iTRAQ4plex), N8(Deamidated), K12(iTRAQ4plex) | 1560.93657 | 43 | 70  |      | 4.13 | Expt1 |
| TNEAQAIETAR                     | 13 | 18017605;149262987;8300330<br>6                                                                          | N-Term(iTRAQ4plex)                                  | 1347.70976 | 43 | 68  |      | 4.17 | Expt1 |
| AVQGGAAAPVVGAVQPVGMPPMPQAPR     | 5  | 149263421;114052541                                                                                      | N-Term(iTRAQ4plex)                                  | 2794.50144 | 43 | 38  |      | 3.98 | Expt1 |
| DFNSIIQTCSGNIQR                 | 6  | 19527102                                                                                                 | N-Term(iTRAQ4plex), C9(Methylthio)                  | 1885.90361 | 43 | 64  |      | 5.23 | Expt1 |
| YGISLCAILDDETK                  | 9  | 124517663                                                                                                | N-Term(iTRAQ4plex), C6(Methylthio), K14(iTRAQ4plex) | 1887.98709 | 43 | 53  |      | 4.81 | Expt1 |
| SGNTPLDMNQFR                    | 4  | 17157983                                                                                                 | N-Term(iTRAQ4plex)                                  | 1523.73906 | 43 | 37  |      | 3.11 | Expt1 |
| GLPWSCSADEVQR                   | 7  | 10946928                                                                                                 | N-Term(iTRAQ4plex), C6(Methylthio)                  | 1637.75139 | 43 | 51  |      | 3.44 | Expt1 |
| ELLTMMGDR                       | 11 | 21728376;71037403;19827855<br>3                                                                          | N-Term(iTRAQ4plex)                                  | 1179.61772 | 43 | 39  |      | 3.05 | Expt1 |
| LAALADQWQFLVQK                  | 4  | 115496850                                                                                                | N-Term(iTRAQ4plex), K14(iTRAQ4plex)                 | 1919.09978 | 43 | 110 | 1.23 | 4.46 | Expt1 |
| AQEVSDDEGADQEEAYLRED            | 5  | 85677504                                                                                                 | N-Term(iTRAQ4plex)                                  | 2427.05840 | 43 | 74  |      | 3.86 | Expt1 |
| VEGFPTIYFAPSGDK                 | 3  | 86198316                                                                                                 | N-Term(iTRAQ4plex), K15(iTRAQ4plex)                 | 1916.00908 | 43 | 71  |      | 4.21 | Expt1 |
| GMNTLVGYDLVPEPK                 | 11 | 112181182                                                                                                | N-Term(iTRAQ4plex), K15(iTRAQ4plex)                 | 1921.04082 | 43 | 68  |      | 3.31 | Expt1 |
| FLEEYLSSTPQR                    | 3  | 164518942                                                                                                | N-Term(iTRAQ4plex)                                  | 1613.82891 | 43 |     |      | 3.75 | Expt1 |
| CIENLEELQSLR                    | 3  | 12963569                                                                                                 | N-Term(iTRAQ4plex), C1(Methylthio)                  | 1636.81682 | 43 | 50  |      | 3.59 | Expt1 |

|                             |    |                                                                                                                           |                                                                                     |            |    |     |      |       |
|-----------------------------|----|---------------------------------------------------------------------------------------------------------------------------|-------------------------------------------------------------------------------------|------------|----|-----|------|-------|
| LLVTELGSSR                  | 3  | 31980942                                                                                                                  | N-Term(iTRAQ4plex)                                                                  | 1305.74919 | 43 | 37  | 3.38 | Expt1 |
| AESEYQVLYIADDNEIR           | 2  | 124494256                                                                                                                 | N-Term(iTRAQ4plex)                                                                  | 2229.08457 | 43 |     | 4.08 | Expt1 |
| LGFAGVVQEISFGTTK            | 10 | 6671702                                                                                                                   | N-Term(iTRAQ4plex), K16(iTRAQ4plex)                                                 | 1942.09568 | 43 | 74  | 4.55 | Expt1 |
| ELVFYLLMMAK                 | 4  | 148277039                                                                                                                 | N-Term(iTRAQ4plex), M8(Oxidation), M9(Oxidation), K11(iTRAQ4plex)                   | 1727.90348 | 43 | 44  | 3.67 | Expt1 |
| FLESLEPEEQQR                | 7  | 113205057;113205053                                                                                                       | N-Term(iTRAQ4plex)                                                                  | 1648.82903 | 43 | 55  | 3.46 | Expt1 |
| LDTVILSPSR                  | 3  | 145966915                                                                                                                 | N-Term(iTRAQ4plex)                                                                  | 1244.73393 | 43 | 44  | 3.14 | Expt1 |
| QYNGVPLDGRPMNIQLVTSQIDTQR   | 1  | 6755763                                                                                                                   | N-Term(iTRAQ4plex), N3(Deamidated)                                                  | 2988.54251 | 43 |     |      | Expt1 |
| GEIAGPPDTPYEGGR             | 8  | 31542956                                                                                                                  | N-Term(iTRAQ4plex)                                                                  | 1659.81011 | 43 | 72  | 4.11 | Expt1 |
| YWLCAATGPSIK                | 9  | 6680047                                                                                                                   | N-Term(iTRAQ4plex), C4(Methylthio), K12(iTRAQ4plex)                                 | 1643.85735 | 43 | 82  | 3.45 | Expt1 |
| IYVISLAEP                   | 14 | 211065507                                                                                                                 | N-Term(iTRAQ4plex)                                                                  | 1304.77153 | 43 | 55  | 3.24 | Expt1 |
| FGVLFQDDR                   | 2  | 153791468                                                                                                                 | N-Term(iTRAQ4plex)                                                                  | 1240.64629 | 43 | 37  |      | Expt1 |
| FGVLFQNDR                   | 3  | 82914650                                                                                                                  | N-Term(iTRAQ4plex), N7(Deamidated)                                                  | 1240.64629 | 43 | 37  |      | Expt1 |
| YQIELLR                     | 12 | 112421039                                                                                                                 | N-Term(iTRAQ4plex)                                                                  | 1191.72368 | 43 | 40  | 3.30 | Expt1 |
| DLGVFIPAPMAQGR              | 3  | 110630015;34486094                                                                                                        | N-Term(iTRAQ4plex)                                                                  | 1615.87834 | 43 | 48  | 3.55 | Expt1 |
| DAEEWFQTK                   | 3  | 6754480                                                                                                                   | N-Term(iTRAQ4plex), K9(iTRAQ4plex)                                                  | 1441.72441 | 43 | 60  | 3.76 | Expt1 |
| ITYGETGNSPVEFTVPGSK         | 3  | 46849812                                                                                                                  | N-Term(iTRAQ4plex), K21(iTRAQ4plex)                                                 | 2456.26242 | 43 | 70  | 4.99 | Expt1 |
| DSVVAGFQWATK                | 3  | 33859482                                                                                                                  | N-Term(iTRAQ4plex), K12(iTRAQ4plex)                                                 | 1596.86687 | 43 | 58  | 4.77 | Expt1 |
| YLLLAGAPR                   | 7  | 7305189                                                                                                                   | N-Term(iTRAQ4plex)                                                                  | 1117.68486 | 43 | 48  | 2.92 | Expt1 |
| EADIDGDGQVNYEEFVQMMTAK      | 7  | 6753244                                                                                                                   | N-Term(iTRAQ4plex), M18(Oxidation), M19(Oxidation), K22(iTRAQ4plex)                 | 2810.28330 | 43 | 91  | 7.17 | Expt1 |
| EANIDGDGQVNYEEFVQMMTAK      | 8  | 149255253;149255689                                                                                                       | N-Term(iTRAQ4plex), N3(Deamidated), M18(Oxidation), M19(Oxidation), K22(iTRAQ4plex) | 2810.28330 | 43 | 91  | 7.17 | Expt1 |
| NALLQLTDSQIADVAR            | 5  | 40018610                                                                                                                  | N-Term(iTRAQ4plex)                                                                  | 1872.03348 | 43 | 67  | 4.80 | Expt1 |
| AENFFILR                    | 12 | 13386054;281427244;281427242                                                                                              | N-Term(iTRAQ4plex)                                                                  | 1153.65080 | 43 | 39  | 3.40 | Expt1 |
| LLLCAR                      | 1  | 6678329                                                                                                                   | N-Term(iTRAQ4plex), C4(Methylthio)                                                  | 878.50975  | 43 |     |      | Expt1 |
| ELEDATETADAMNR              | 4  | 114326446                                                                                                                 | N-Term(iTRAQ4plex), M12(Oxidation)                                                  | 1725.77275 | 43 | 58  |      | Expt1 |
| PGVDLPSVDLSMPK              | 7  | 61743961                                                                                                                  | N-Term(iTRAQ4plex), K15(iTRAQ4plex)                                                 | 1799.98686 | 43 | 74  | 3.90 | Expt1 |
| SLGGQAVQVR                  | 10 | 226246550;226246552                                                                                                       | N-Term(iTRAQ4plex)                                                                  | 1158.67156 | 43 | 52  | 3.49 | Expt1 |
| AVLCPPPVK                   | 3  | 18875380;45592934                                                                                                         | N-Term(iTRAQ4plex), C4(Methylthio), K9(iTRAQ4plex)                                  | 1257.72588 | 43 | 45  | 3.05 | Expt1 |
| VEEEIVTLR                   | 5  | 31560247                                                                                                                  | N-Term(iTRAQ4plex)                                                                  | 1231.70354 | 43 | 48  | 3.65 | Expt1 |
| TISAEVLAIDENTGK             | 7  | 110625833                                                                                                                 | N-Term(iTRAQ4plex), K15(iTRAQ4plex)                                                 | 1849.01763 | 43 | 118 | 5.52 | Expt1 |
| SLSSPNCFGPQGGPEMR           | 4  | 161484644                                                                                                                 | N-Term(iTRAQ4plex), C7(Methylthio)                                                  | 2050.92754 | 43 | 49  | 5.14 | Expt1 |
| IIVLGLLPR                   | 20 | 40254624                                                                                                                  | N-Term(iTRAQ4plex)                                                                  | 1137.78447 | 43 | 41  | 3.22 | Expt1 |
| VQQTVQDLFGR                 | 3  | 162461907                                                                                                                 | N-Term(iTRAQ4plex)                                                                  | 1434.78642 | 43 | 51  | 3.42 | Expt1 |
| ELNWSLR                     | 4  | 224922803                                                                                                                 | N-Term(iTRAQ4plex)                                                                  | 1190.63103 | 43 | 36  | 3.16 | Expt1 |
| STPEYFAER                   | 6  | 31981302;158966670                                                                                                        | N-Term(iTRAQ4plex)                                                                  | 1243.60881 | 43 | 33  | 3.29 | Expt1 |
| DGMNDQGGYGSVGR              | 3  | 119637823                                                                                                                 | N-Term(iTRAQ4plex)                                                                  | 1556.69414 | 43 | 70  | 4.15 | Expt1 |
| EVATAIR                     | 3  | 149253083;82898647;149255335;82902507;94383782;94383784;149259263;63594466;149263154;149265803;94401827;94402540;94404463 | N-Term(iTRAQ4plex)                                                                  | 903.53826  | 43 | 40  |      | Expt1 |
| QVATAIR                     | 3  | 82993808;149269353                                                                                                        | N-Term(iTRAQ4plex), Q1(Deamidated)                                                  | 903.53826  | 43 | 40  |      | Expt1 |
| VSMESVR                     | 2  | 148277039                                                                                                                 | N-Term(iTRAQ4plex)                                                                  | 951.50682  | 43 | 35  |      | Expt1 |
| VPAATSAITNDGIGINPAQTAGNVFLK | 3  | 13385932                                                                                                                  | N-Term(iTRAQ4plex), K28(iTRAQ4plex)                                                 | 3041.69895 | 43 | 103 | 5.11 | Expt1 |
| YGAFVKPSAVTVGDFPEEDYGLDEM   | 3  | 170650659                                                                                                                 | N-Term(iTRAQ4plex), K6(iTRAQ4plex)                                                  | 3024.44034 | 43 | 64  | 3.56 | Expt1 |
| CSNNGLVAGFQSR               | 27 | 9789943                                                                                                                   | N-Term(iTRAQ4plex), C1(Methylthio), N4(Deamidated)                                  | 1543.70976 | 43 | 77  | 4.52 | Expt1 |
| MEPLNQLQVAVK                | 3  | 78711838;21313640;88853578                                                                                                | N-Term(iTRAQ4plex), K12(iTRAQ4plex)                                                 | 1643.93669 | 43 | 76  | 4.94 | Expt1 |
| GCILTVER                    | 6  | 149258001;22203755                                                                                                        | N-Term(iTRAQ4plex), C2(Methylthio)                                                  | 1193.64995 | 43 | 46  | 3.18 | Expt1 |
| DQPPNSVEGLLNALR             | 5  | 21450053                                                                                                                  | N-Term(iTRAQ4plex)                                                                  | 1766.95635 | 43 | 71  | 4.18 | Expt1 |
| DILIQYDR                    | 4  | 149254484                                                                                                                 | N-Term(iTRAQ4plex)                                                                  | 1179.64861 | 43 | 38  | 2.87 | Expt1 |
| YTGEDFDLDR                  | 3  | 134288917                                                                                                                 | N-Term(iTRAQ4plex)                                                                  | 1503.67668 | 43 | 43  | 3.55 | Expt1 |
| EEDLSSFSIADLK               | 3  | 116734870                                                                                                                 | N-Term(iTRAQ4plex), K13(iTRAQ4plex)                                                 | 1741.91837 | 43 | 40  | 3.33 | Expt1 |
| ANINVENAFFTLAR              | 3  | 38372905                                                                                                                  | N-Term(iTRAQ4plex)                                                                  | 1723.92620 | 43 | 60  | 3.74 | Expt1 |

|                                 |    |                                                              |                                                                                      |            |    |    |  |      |       |
|---------------------------------|----|--------------------------------------------------------------|--------------------------------------------------------------------------------------|------------|----|----|--|------|-------|
| GQAFVIFK                        | 3  | 82986751;114052541;23956110                                  | N-Term(iTRAQ4plex), K8(iTRAQ4plex)                                                   | 1197.73271 | 43 | 51 |  | 3.06 | Expt1 |
| DLLFQALGR                       | 4  | 31981400                                                     | N-Term(iTRAQ4plex)                                                                   | 1176.68425 | 43 | 48 |  | 2.85 | Expt1 |
| ETPPDALILESPFTNIR               | 5  | 159110817                                                    | N-Term(iTRAQ4plex)                                                                   | 2057.10715 | 43 | 43 |  | 3.82 | Expt1 |
| INAQQLSHVNYR                    | 1  | 117606372;117606368                                          | N-Term(iTRAQ4plex), N2(Deamidated), Q4(Deamidated), N10(Deamidated), Y11(iTRAQ4plex) | 1733.89055 | 43 |    |  |      | Expt1 |
| NTSEQDQPMGGWEMIR                | 11 | 188219589                                                    | N-Term(iTRAQ4plex)                                                                   | 2022.91387 | 43 | 98 |  | 5.09 | Expt1 |
| DGLILTSR                        | 10 | 55741460                                                     | N-Term(iTRAQ4plex)                                                                   | 1018.60253 | 43 | 45 |  | 3.18 | Expt1 |
| ADLTALFLPR                      | 3  | 11528490                                                     | N-Term(iTRAQ4plex)                                                                   | 1260.74712 | 43 | 45 |  | 3.29 | Expt1 |
| MCDLVSDFDGFSER                  | 3  | 31560737                                                     | N-Term(iTRAQ4plex), M1(Oxidation), C2(Methylthio)                                    | 1826.75652 | 43 | 73 |  | 3.54 | Expt1 |
| VPPPLAPR                        | 4  | 237820699                                                    | N-Term(iTRAQ4plex)                                                                   | 1087.67424 | 42 | 33 |  |      | Expt1 |
| EMVELPLR                        | 6  | 225543319;94408011                                           | N-Term(iTRAQ4plex)                                                                   | 1130.63628 | 42 | 40 |  | 3.18 | Expt1 |
| FAQDVSQDDLIR                    | 3  | 15809002                                                     | N-Term(iTRAQ4plex)                                                                   | 1550.79289 | 42 | 43 |  | 3.40 | Expt1 |
| VQPSDGPQSISYK                   | 3  | 111185907                                                    | N-Term(iTRAQ4plex), K13(iTRAQ4plex)                                                  | 1693.90154 | 42 | 53 |  | 3.84 | Expt1 |
| SVMDATQIAGLNCLR                 | 4  | 112293266                                                    | N-Term(iTRAQ4plex), M3(Oxidation), C13(Methylthio)                                   | 1797.88371 | 42 | 65 |  | 2.87 | Expt1 |
| VPDNYGDEIAIELR                  | 5  | 170784813;170784811                                          | N-Term(iTRAQ4plex)                                                                   | 1747.90495 | 42 | 84 |  | 4.08 | Expt1 |
| SDYLNTFEFMDK                    | 4  | 162417975                                                    | N-Term(iTRAQ4plex), K12(iTRAQ4plex)                                                  | 1797.87200 | 42 | 62 |  | 4.00 | Expt1 |
| AVQTLQMLQQIMK                   | 3  | 7305085                                                      | N-Term(iTRAQ4plex), M7(Oxidation), K14(iTRAQ4plex)                                   | 1965.08677 | 42 | 56 |  | 4.31 | Expt1 |
| DFMIQGGDPTGTGR                  | 3  | 149269121                                                    | N-Term(iTRAQ4plex)                                                                   | 1595.76042 | 42 | 50 |  | 3.69 | Expt1 |
| VSDLLSTDER                      | 5  | 93102409                                                     | N-Term(iTRAQ4plex)                                                                   | 1391.74919 | 42 | 49 |  | 3.50 | Expt1 |
| VNPDVLTNNQR                     | 3  | 70909345                                                     | N-Term(iTRAQ4plex)                                                                   | 1413.75749 | 42 | 43 |  | 3.44 | Expt1 |
| SVDEALR                         | 3  | 148747558                                                    | N-Term(iTRAQ4plex)                                                                   | 933.51207  | 42 | 37 |  | 2.92 | Expt1 |
| LPVLPK                          | 21 | 6679166                                                      | N-Term(iTRAQ4plex), K7(iTRAQ4plex)                                                   | 1051.70500 | 42 | 47 |  |      | Expt1 |
| QAADMILLDDNFASIVTGVVEGR         | 3  | 21450277;30409956;226958351;21450321                         | N-Term(iTRAQ4plex), M5(Oxidation)                                                    | 2624.31681 | 42 | 84 |  | 4.65 | Expt1 |
| AALSEELDAVDTGVGR                | 3  | 70608119;70608144                                            | N-Term(iTRAQ4plex)                                                                   | 1746.90190 | 42 | 60 |  | 4.86 | Expt1 |
| AAPFVECGQR                      | 9  | 34328045                                                     | N-Term(iTRAQ4plex), C7(Methylthio)                                                   | 1267.60442 | 42 | 36 |  | 3.29 | Expt1 |
| TFPPEEEAETHAELEEQAPEGADIQNVDEVK | 3  | 125628659                                                    | N-Term(iTRAQ4plex), K32(iTRAQ4plex)                                                  | 3868.82680 | 42 | 39 |  | 3.97 | Expt1 |
| APEDIDPQPGSYEIR                 | 3  | 9507129                                                      | N-Term(iTRAQ4plex)                                                                   | 1830.90251 | 42 | 54 |  | 3.44 | Expt1 |
| SLEEALR                         | 4  | 13385466                                                     | N-Term(iTRAQ4plex)                                                                   | 961.54449  | 42 | 58 |  | 2.82 | Expt1 |
| INVLPLGSGAIGNPLGVDR             | 8  | 19526986                                                     | N-Term(iTRAQ4plex)                                                                   | 2077.19858 | 42 | 57 |  | 4.10 | Expt1 |
| TIDWVSFVEVMPQNK                 | 5  | 149266312;21313679                                           | N-Term(iTRAQ4plex), K16(iTRAQ4plex)                                                  | 2209.16928 | 42 | 51 |  | 4.31 | Expt1 |
| DLGAQGAVAEALAEAGR               | 7  | 124487155                                                    | N-Term(iTRAQ4plex)                                                                   | 1942.99590 | 42 | 74 |  | 5.03 | Expt1 |
| SDNVPPPTDLQFVELTDVK             | 7  | 46849812                                                     | N-Term(iTRAQ4plex), K19(iTRAQ4plex)                                                  | 2402.27579 | 42 | 56 |  | 4.41 | Expt1 |
| GILTLK                          | 5  | 6671509;6752954;6671507;157823889;14192922;33563240;30425250 | N-Term(iTRAQ4plex), K6(iTRAQ4plex)                                                   | 932.64879  | 42 | 26 |  |      | Expt1 |
| LVLARR                          | 4  | 169259776                                                    | N-Term(iTRAQ4plex)                                                                   | 984.66826  | 42 | 24 |  |      | Expt1 |
| SVEETLR                         | 1  | 6680690                                                      | N-Term(iTRAQ4plex)                                                                   | 977.54234  | 42 |    |  |      | Expt1 |
| LVLQLR                          | 6  | 149270110;19527372                                           | N-Term(iTRAQ4plex)                                                                   | 984.66765  | 42 |    |  |      | Expt1 |
| IIAPPER                         | 9  | 6671509;6752954;6671507;157823889;14192922;33563240;30425250 | N-Term(iTRAQ4plex)                                                                   | 939.57543  | 42 | 38 |  |      | Expt1 |
| VLDELTLAK                       | 3  | 6754480                                                      | N-Term(iTRAQ4plex), K9(iTRAQ4plex)                                                   | 1289.80290 | 42 | 66 |  | 3.43 | Expt1 |
| YFEAYLPQGTASSSNPSACLNPVLEK      | 3  | 110625744                                                    | N-Term(iTRAQ4plex), C19(Methylthio), K27(iTRAQ4plex)                                 | 3221.58908 | 42 | 42 |  | 3.46 | Expt1 |
| GQYTDFAQVNPRLR                  | 6  | 21536248                                                     | N-Term(iTRAQ4plex)                                                                   | 1867.94255 | 42 | 76 |  | 4.47 | Expt1 |
| GQLGNWMSDFEQR                   | 3  | 28077029                                                     | N-Term(iTRAQ4plex)                                                                   | 1808.84966 | 42 | 69 |  | 3.78 | Expt1 |
| IAQWQFNR                        | 11 | 148277039                                                    | N-Term(iTRAQ4plex)                                                                   | 1206.65422 | 42 | 42 |  | 3.12 | Expt1 |
| CVLIFGVPSR                      | 3  | 34328485                                                     | N-Term(iTRAQ4plex), C1(Methylthio)                                                   | 1280.69792 | 42 | 39 |  | 3.04 | Expt1 |
| LSSELLR                         | 2  | 52138536;40556608;6754254                                    | N-Term(iTRAQ4plex)                                                                   | 874.54631  | 42 | 31 |  |      | Expt1 |
| LSQLLR                          | 2  | 33469017                                                     | N-Term(iTRAQ4plex), Q3(Deamidated)                                                   | 874.54631  | 42 | 31 |  |      | Expt1 |
| FLIDGPPR                        | 3  | 165377065                                                    | N-Term(iTRAQ4plex)                                                                   | 1108.62822 | 42 | 36 |  |      | Expt1 |
| EAFQPQEPDFPPPPDLEQLR            | 6  | 31543942                                                     | N-Term(iTRAQ4plex)                                                                   | 2591.29538 | 42 |    |  | 3.12 | Expt1 |
| NAFINQPTAELHPNGLPPSYTIILLFR     | 3  | 111074529                                                    | N-Term(iTRAQ4plex), N14(Deamidated)                                                  | 3181.72263 | 42 |    |  | 4.83 | Expt1 |
| WIDNPTVDDR                      | 6  | 31543942                                                     | N-Term(iTRAQ4plex)                                                                   | 1374.68047 | 42 | 50 |  | 3.65 | Expt1 |
| DAGLSPEQPALALAGVAASPR           | 7  | 81295421;81295418;209862955                                  | N-Term(iTRAQ4plex)                                                                   | 2135.16739 | 42 | 81 |  | 4.59 | Expt1 |
| LEDTENWLYEDGEDQPK               | 5  | 112293266                                                    | N-Term(iTRAQ4plex), K17(iTRAQ4plex)                                                  | 2369.09941 | 42 | 70 |  | 4.12 | Expt1 |

|                                  |    |                                                                                                                                                       |                                                     |            |    |     |      |       |
|----------------------------------|----|-------------------------------------------------------------------------------------------------------------------------------------------------------|-----------------------------------------------------|------------|----|-----|------|-------|
| LSISGNYNLETLMSPGLITR             | 5  | 6678087                                                                                                                                               | N-Term(iTRAQ4plex), M13(Oxidation)                  | 2339.24370 | 42 | 76  | 5.33 | Expt1 |
| DNFTLIPEGNGTEER                  | 8  | 40254595                                                                                                                                              | N-Term(iTRAQ4plex), N11(Deamidated)                 | 1937.92119 | 42 | 69  | 3.61 | Expt1 |
| LQALEQETR                        | 9  | 112421039                                                                                                                                             | N-Term(iTRAQ4plex)                                  | 1231.67737 | 42 | 57  | 3.07 | Expt1 |
| FSVMYNEQMASQK                    | 2  | 33563290                                                                                                                                              | N-Term(iTRAQ4plex), K13(iTRAQ4plex)                 | 1850.90897 | 42 |     | 2.95 | Expt1 |
| TPLSEAEFEEIMNR                   | 5  | 62909983                                                                                                                                              | N-Term(iTRAQ4plex)                                  | 1809.88725 | 42 | 80  | 3.91 | Expt1 |
| DFETQAAAQAR                      | 5  | 6677869                                                                                                                                               | N-Term(iTRAQ4plex)                                  | 1351.67192 | 42 | 56  | 3.52 | Expt1 |
| YYAVNYPLR                        | 2  | 149252963;149269491;149269493;6680193                                                                                                                 | N-Term(iTRAQ4plex)                                  | 1302.69658 | 42 |     | 3.05 | Expt1 |
| DPETLLGYSMVGCQR                  | 5  | 93102409                                                                                                                                              | N-Term(iTRAQ4plex), C13(Methylthio)                 | 1858.86955 | 42 | 58  | 4.00 | Expt1 |
| AVAILPGLGR                       | 3  | 171460960                                                                                                                                             | N-Term(iTRAQ4plex)                                  | 1225.73955 | 42 | 41  | 3.26 | Expt1 |
| GTLISSEEGETEANNPK                | 3  | 7709986                                                                                                                                               | N-Term(iTRAQ4plex), K18(iTRAQ4plex)                 | 2177.11759 | 42 | 50  | 4.50 | Expt1 |
| DIQLAR                           | 1  | 30061345;30061339;149246529;82886797;149255259;149255706;38091641;94395563;82952425;82952638;124486606;30061401                                       | N-Term(iTRAQ4plex), Q3(Deamidated)                  | 860.49712  | 42 |     |      | Expt1 |
| NLEIAR                           | 2  | 156938259;226823250                                                                                                                                   | N-Term(iTRAQ4plex), N1(Deamidated)                  | 860.49712  | 42 |     |      | Expt1 |
| GYSGLQGLPGLAGLHGDQAGPVGPGAPGR    | 4  | 111120329                                                                                                                                             | N-Term(iTRAQ4plex)                                  | 2897.51859 | 42 | 44  | 4.15 | Expt1 |
| ETLEEVFEK                        | 5  | 84875537                                                                                                                                              | N-Term(iTRAQ4plex), K9(iTRAQ4plex)                  | 1411.75163 | 42 | 43  | 3.92 | Expt1 |
| SMLEVNYPMENGIVR                  | 10 | 22122825                                                                                                                                              | N-Term(iTRAQ4plex), M2(Oxidation), N11(Deamidated)  | 1912.92803 | 42 | 53  | 3.81 | Expt1 |
| TLMLVK                           | 3  | 6754090                                                                                                                                               | N-Term(iTRAQ4plex), K6(iTRAQ4plex)                  | 992.65099  | 42 | 45  |      | Expt1 |
| DLGYITIR                         | 8  | 170172540                                                                                                                                             | N-Term(iTRAQ4plex)                                  | 1257.69524 | 42 | 40  | 3.23 | Expt1 |
| SQAFIEMETR                       | 3  | 25141233                                                                                                                                              | N-Term(iTRAQ4plex)                                  | 1355.67461 | 42 | 42  | 3.06 | Expt1 |
| LTIAEER                          | 3  | 6677805;82907488                                                                                                                                      | N-Term(iTRAQ4plex)                                  | 975.56096  | 42 | 35  |      | Expt1 |
| YDDEECTLPIAGR                    | 9  | 118197277                                                                                                                                             | N-Term(iTRAQ4plex), C6(Methylthio)                  | 1671.75334 | 42 | 71  | 3.75 | Expt1 |
| VQAMYIWWDTGTEGLR                 | 2  | 31982332                                                                                                                                              | N-Term(iTRAQ4plex)                                  | 1938.99240 | 42 |     | 3.00 | Expt1 |
| AFGYGGLR                         | 12 | 8567402;149251459;149266618                                                                                                                           | N-Term(iTRAQ4plex)                                  | 1187.63335 | 42 | 52  | 2.97 | Expt1 |
| CTVNDQNSDGYCQTGTMSR              | 17 | 82950147;82950149;149264086                                                                                                                           | N-Term(iTRAQ4plex), C1(Methylthio), C12(Methylthio) | 2315.88774 | 42 | 107 | 4.71 | Expt1 |
| EYQLNDSAAYYLNDLER                | 5  | 41054806                                                                                                                                              | N-Term(iTRAQ4plex)                                  | 2221.05547 | 42 | 96  | 4.31 | Expt1 |
| LVQIEYALAAVAGGAPSVGIK            | 3  | 134031994                                                                                                                                             | N-Term(iTRAQ4plex), K21(iTRAQ4plex)                 | 2315.37265 | 42 | 52  | 3.43 | Expt1 |
| EEDTSAGTGDPPR                    | 3  | 7305619                                                                                                                                               | N-Term(iTRAQ4plex)                                  | 1475.67558 | 42 | 79  | 3.38 | Expt1 |
| DAEWFFSK                         | 3  | 21489935                                                                                                                                              | N-Term(iTRAQ4plex), K9(iTRAQ4plex)                  | 1446.72038 | 42 | 47  | 3.61 | Expt1 |
| TCAELVQEAAR                      | 3  | 6754856                                                                                                                                               | N-Term(iTRAQ4plex), C2(Methylthio)                  | 1380.67339 | 42 | 38  | 3.12 | Expt1 |
| GPDSVFLIK                        | 3  | 160358829                                                                                                                                             | N-Term(iTRAQ4plex), K9(iTRAQ4plex)                  | 1263.76494 | 42 | 49  | 3.67 | Expt1 |
| LATNAAVTVLR                      | 10 | 126723461                                                                                                                                             | N-Term(iTRAQ4plex)                                  | 1272.77873 | 42 | 60  | 4.03 | Expt1 |
| LDAEVPTR                         | 1  | 9790161                                                                                                                                               | N-Term(iTRAQ4plex)                                  | 1044.58159 | 42 |     |      | Expt1 |
| GVSLAPPGTPAPLDSPAR               | 7  | 153791477                                                                                                                                             | N-Term(iTRAQ4plex)                                  | 1847.01628 | 42 | 69  | 3.71 | Expt1 |
| EDVGQPQGR                        | 3  | 30519911                                                                                                                                              | N-Term(iTRAQ4plex)                                  | 1226.62822 | 42 | 44  | 3.47 | Expt1 |
| SLPASLVPEPDFVMTDFAK              | 5  | 6678483                                                                                                                                               | N-Term(iTRAQ4plex), M13(Oxidation), K18(iTRAQ4plex) | 2271.18802 | 42 | 59  | 4.22 | Expt1 |
| AFIGFEGVK                        | 3  | 82950147;82950149;149264086                                                                                                                           | N-Term(iTRAQ4plex), K9(iTRAQ4plex)                  | 1255.73979 | 42 | 50  | 3.60 | Expt1 |
| SGTLQSNFCSSSLVVTGTVK             | 2  | 125490382                                                                                                                                             | N-Term(iTRAQ4plex), C9(Methylthio), K20(iTRAQ4plex) | 2349.21146 | 42 |     | 3.50 | Expt1 |
| ENMAYTVEGIR                      | 5  | 22267442                                                                                                                                              | N-Term(iTRAQ4plex)                                  | 1426.71123 | 42 | 45  | 3.48 | Expt1 |
| WVNLDNRR                         | 9  | 229608920                                                                                                                                             | N-Term(iTRAQ4plex)                                  | 1174.60942 | 42 | 41  | 2.96 | Expt1 |
| CVNLA PGFR                       | 13 | 6755781                                                                                                                                               | N-Term(iTRAQ4plex), C1(Methylthio)                  | 1166.59319 | 42 | 35  | 3.51 | Expt1 |
| YQEEGVPQPR                       | 6  | 160333863                                                                                                                                             | N-Term(iTRAQ4plex)                                  | 1443.73760 | 42 | 57  | 3.41 | Expt1 |
| AGPPAPAPPAPIPPPAPPQSSPPEQPQSMEMR | 1  | 94379918;58082069                                                                                                                                     | N-Term(iTRAQ4plex)                                  | 3368.68979 | 42 |     |      | Expt1 |
| GGLPSQAFEVILYNK                  | 7  | 166235890                                                                                                                                             | N-Term(iTRAQ4plex), K15(iTRAQ4plex)                 | 1988.07108 | 42 | 47  | 4.03 | Expt1 |
| AFFDLIDADTK                      | 3  | 149233991                                                                                                                                             | N-Term(iTRAQ4plex), K11(iTRAQ4plex)                 | 1543.83110 | 42 | 67  | 3.94 | Expt1 |
| YGAATFTR                         | 23 | 148277039;110347469                                                                                                                                   | N-Term(iTRAQ4plex)                                  | 1030.54248 | 41 | 46  | 3.30 | Expt1 |
| LAADDFR                          | 7  | 6680604;6754480;154090941;198278448;238231425;7106335;89179318;226823299;112983636;145966692;6680606;122425580;226823220;21489935;254540068;254553305 | N-Term(iTRAQ4plex)                                  | 951.50244  | 41 | 41  | 3.01 | Expt1 |

|                         |    |                                                                                     |                                                      |            |    |    |  |      |       |
|-------------------------|----|-------------------------------------------------------------------------------------|------------------------------------------------------|------------|----|----|--|------|-------|
| MFVLDEADEMLSR           | 7  | 176865892;21450625;176866061;149270417;226823309;176865998                          | N-Term(iTRAQ4plex), M1(Oxidation), M10(Oxidation)    | 1731.80925 | 41 | 52 |  |      | Expt1 |
| QTIQSLR                 | 5  | 163965444                                                                           | N-Term(iTRAQ4plex), Q1(Deamidated), Q4(Deamidated)   | 991.55675  | 41 | 36 |  |      | Expt1 |
| EDAVSASLK               | 7  | 160333372                                                                           | N-Term(iTRAQ4plex), K9(iTRAQ4plex)                   | 1207.68913 | 41 | 59 |  | 3.78 | Expt1 |
| MDLAGDSGDGWSLAELR       | 5  | 188035858                                                                           | N-Term(iTRAQ4plex)                                   | 1978.96623 | 41 | 72 |  | 3.61 | Expt1 |
| QPAENVNQYLTDISK         | 4  | 6678483                                                                             | N-Term(iTRAQ4plex), K14(iTRAQ4plex)                  | 1894.97307 | 41 | 70 |  | 3.63 | Expt1 |
| VQGGNLFFR               | 2  | 171460960                                                                           | N-Term(iTRAQ4plex)                                   | 1252.69145 | 41 |    |  | 3.28 | Expt1 |
| EFPTVPLVK               | 6  | 21314832                                                                            | N-Term(iTRAQ4plex), K9(iTRAQ4plex)                   | 1317.79277 | 41 | 43 |  | 3.43 | Expt1 |
| YLPDMAEK                | 5  | 18875400;117647236;110626031                                                        | N-Term(iTRAQ4plex), K9(iTRAQ4plex)                   | 1381.77422 | 41 | 56 |  | 3.58 | Expt1 |
| LQEELAASDR              | 4  | 29336026                                                                            | N-Term(iTRAQ4plex)                                   | 1275.66680 | 41 | 36 |  | 3.50 | Expt1 |
| VTAMQLYECQLIDK          | 8  | 82950147;82950149;149264086                                                         | N-Term(iTRAQ4plex), C9(Methylthio), K14(iTRAQ4plex)  | 1989.00675 | 41 | 54 |  | 4.15 | Expt1 |
| STTPDITGYR              | 5  | 46849812                                                                            | N-Term(iTRAQ4plex)                                   | 1254.64519 | 41 | 34 |  | 3.54 | Expt1 |
| GEQSISWLR               | 4  | 33469047                                                                            | N-Term(iTRAQ4plex)                                   | 1219.65776 | 41 |    |  | 3.35 | Expt1 |
| DLLLDPAWEK              | 6  | 61097906;11230802;7304855;157951643                                                 | N-Term(iTRAQ4plex), K10(iTRAQ4plex)                  | 1487.84197 | 41 | 78 |  | 3.69 | Expt1 |
| NLNEQGLR                | 16 | 22203747                                                                            | N-Term(iTRAQ4plex)                                   | 1087.59827 | 41 | 51 |  | 3.33 | Expt1 |
| NVPPGLDEYNPFSDSR        | 6  | 58037395                                                                            | N-Term(iTRAQ4plex)                                   | 1950.93169 | 41 | 56 |  | 3.00 | Expt1 |
| DLLSSVSR                | 4  | 160707958                                                                           | N-Term(iTRAQ4plex)                                   | 1020.58129 | 41 | 44 |  |      | Expt1 |
| FLQPGSQR                | 4  | 149259728;149259801;149260045;149260087;154350202;31981724;160298217                | N-Term(iTRAQ4plex)                                   | 1076.59697 | 41 | 35 |  | 3.18 | Expt1 |
| LYTVDYLSNMVGGGR         | 5  | 30519997                                                                            | N-Term(iTRAQ4plex)                                   | 1731.89128 | 41 | 50 |  | 4.26 | Expt1 |
| IIEDNEYTAR              | 6  | 33859570;171543837;34734056;70794811;6678617;70794809;171543841;287323109;244791455 | N-Term(iTRAQ4plex)                                   | 1367.69499 | 41 | 38 |  | 3.25 | Expt1 |
| AVDPDSPAASGLR           | 2  | 6755566                                                                             | N-Term(iTRAQ4plex)                                   | 1528.77275 | 41 |    |  | 3.16 | Expt1 |
| IIDTNTCNSEEAYGGR        | 4  | 148747219                                                                           | N-Term(iTRAQ4plex), C7(Methylthio)                   | 1932.85881 | 41 | 68 |  | 2.99 | Expt1 |
| VELEAR                  | 2  | 20911031                                                                            | N-Term(iTRAQ4plex)                                   | 860.49718  | 41 |    |  |      | Expt1 |
| ELPDSVPOECTVR           | 5  | 149270772;149270774;153791796                                                       | N-Term(iTRAQ4plex), C10(Methylthio)                  | 1662.79399 | 41 | 48 |  | 3.57 | Expt1 |
| LEEDQIIMEDQNCK          | 3  | 114326446                                                                           | N-Term(iTRAQ4plex), C13(Methylthio), K14(iTRAQ4plex) | 2041.94866 | 41 | 85 |  | 4.85 | Expt1 |
| YENELTLR                | 8  | 6754480;226823220                                                                   | N-Term(iTRAQ4plex)                                   | 1181.62920 | 41 | 36 |  | 3.35 | Expt1 |
| GIGMGNLGPAGMGMEGIGFGINK | 3  | 21313308;158186704                                                                  | N-Term(iTRAQ4plex), K23(iTRAQ4plex)                  | 2466.25412 | 41 | 64 |  | 6.42 | Expt1 |
| AQEDEVQLR               | 3  | 112421039                                                                           | N-Term(iTRAQ4plex)                                   | 1344.72551 | 41 | 49 |  | 3.67 | Expt1 |
| NIVVEGVR                | 7  | 82886628;21704100                                                                   | N-Term(iTRAQ4plex)                                   | 1128.68572 | 41 | 44 |  | 2.90 | Expt1 |
| YGLSAAAAAAAAAAVEQR      | 2  | 149263391;22003884                                                                  | N-Term(iTRAQ4plex)                                   | 1877.00882 | 41 |    |  | 3.24 | Expt1 |
| RVQDFR                  | 1  | 13385124                                                                            | N-Term(iTRAQ4plex), Q3(Deamidated)                   | 965.51849  | 41 |    |  |      | Expt1 |
| SPSWEPPFR               | 8  | 158937312                                                                           | N-Term(iTRAQ4plex)                                   | 1149.58330 | 41 | 42 |  | 2.83 | Expt1 |
| IPAETLNR                | 11 | 6678321                                                                             | N-Term(iTRAQ4plex)                                   | 1057.61479 | 41 | 43 |  |      | Expt1 |
| LPIGSYF                 | 2  | 6679166                                                                             | N-Term(iTRAQ4plex), Y6(iTRAQ4plex)                   | 1084.63982 | 41 | 38 |  |      | Expt1 |
| IGDTIEFR                | 3  | 19745150                                                                            | N-Term(iTRAQ4plex)                                   | 1094.59770 | 41 | 37 |  |      | Expt1 |
| INLIAPPR                | 9  | 13385624                                                                            | N-Term(iTRAQ4plex)                                   | 1037.65923 | 41 | 36 |  | 2.95 | Expt1 |
| VVVLGLLPR               | 22 | 6679201                                                                             | N-Term(iTRAQ4plex)                                   | 1109.75224 | 41 | 35 |  | 2.93 | Expt1 |
| CCDIPSR                 | 30 | 111074529                                                                           | N-Term(iTRAQ4plex), C1(Methylthio), C2(Methylthio)   | 1029.40886 | 41 | 30 |  |      | Expt1 |
| IVLISGRR                | 7  | 226371633                                                                           | N-Term(iTRAQ4plex)                                   | 1057.68682 | 41 | 30 |  |      | Expt1 |
| SNGSVFVR                | 1  | 19111156                                                                            | N-Term(iTRAQ4plex)                                   | 1009.54308 | 41 |    |  |      | Expt1 |
| DIILPFR                 | 1  | 6753074                                                                             | N-Term(iTRAQ4plex)                                   | 1017.61980 | 41 |    |  |      | Expt1 |
| IYVEIER                 | 1  | 13385384                                                                            | N-Term(iTRAQ4plex)                                   | 1065.60417 | 41 |    |  |      | Expt1 |
| GIFEPFGR                | 1  | 118403314                                                                           | N-Term(iTRAQ4plex)                                   | 1066.58660 | 41 |    |  |      | Expt1 |
| FITIFGTR                | 2  | 6753060                                                                             | N-Term(iTRAQ4plex)                                   | 1098.64592 | 41 |    |  |      | Expt1 |
| YMLLCK                  | 1  | 134053905                                                                           | N-Term(iTRAQ4plex), C5(Methylthio), K6(iTRAQ4plex)   | 1104.57927 | 41 |    |  |      | Expt1 |
| QLAQIDGTLSTIEFQR        | 15 | 149250318;28077049                                                                  | N-Term(iTRAQ4plex)                                   | 1964.06009 | 41 | 76 |  | 5.05 | Expt1 |
| GVSSGPGPMGLMGPR         | 18 | 111120329                                                                           | N-Term(iTRAQ4plex), M9(Oxidation), M12(Oxidation)    | 1575.77471 | 41 | 59 |  | 4.44 | Expt1 |
| MDATSYSSIASFEVGR        | 3  | 117606385                                                                           | N-Term(iTRAQ4plex)                                   | 1864.89165 | 41 | 83 |  | 4.64 | Expt1 |

|                       |    |                                                                                               |                                                                     |            |    |    |      |      |       |
|-----------------------|----|-----------------------------------------------------------------------------------------------|---------------------------------------------------------------------|------------|----|----|------|------|-------|
| FSSEFELQLEQFK         | 3  | 225637487                                                                                     | N-Term(iTRAQ4plex), K14(iTRAQ4plex)                                 | 2048.07676 | 41 | 51 |      | 3.62 | Expt1 |
| FNPFVTSR              | 7  | 6677777;8294232;82958980                                                                      | N-Term(iTRAQ4plex)                                                  | 1226.63176 | 41 | 41 |      | 3.08 | Expt1 |
| FSYLAVIEGAK           | 3  | 133505845                                                                                     | N-Term(iTRAQ4plex), K11(iTRAQ4plex)                                 | 1485.85845 | 41 | 81 |      | 4.05 | Expt1 |
| EEDSEESLLWR           | 9  | 33469047                                                                                      | N-Term(iTRAQ4plex)                                                  | 1536.73247 | 41 | 56 |      | 4.18 | Expt1 |
| LLVLYSGEDELRL         | 5  | 227908790                                                                                     | N-Term(iTRAQ4plex)                                                  | 1778.96892 | 41 | 69 |      | 4.00 | Expt1 |
| YDMVTDCSYTVQVR        | 7  | 86439989                                                                                      | N-Term(iTRAQ4plex), M3(Oxidation), C7(Methylthio)                   | 1956.86479 | 41 | 69 |      | 4.72 | Expt1 |
| VGDVYIPR              | 4  | 6755478                                                                                       | N-Term(iTRAQ4plex)                                                  | 1062.60710 | 41 | 46 |      | 2.99 | Expt1 |
| CDLEDER               | 2  | 21704066;149261508;15042957                                                                   | N-Term(iTRAQ4plex), C1(Methylthio)                                  | 1069.44072 | 41 | 44 |      |      | Expt1 |
| STELLIR               | 25 | 30061345;30061339;149246529;82886797;149255259;149255706;38091641;94395563;124486606;30061401 | N-Term(iTRAQ4plex)                                                  | 975.59589  | 41 | 59 |      | 3.15 | Expt1 |
| FIEIAAR               | 3  | 160333923                                                                                     | N-Term(iTRAQ4plex)                                                  | 963.57562  | 41 | 46 |      |      | Expt1 |
| GLDVQVR               | 3  | 31560359                                                                                      | N-Term(iTRAQ4plex)                                                  | 930.55205  | 41 | 37 |      |      | Expt1 |
| LDFNLVR               | 1  | 149234067                                                                                     | N-Term(iTRAQ4plex)                                                  | 1020.59752 | 41 |    |      |      | Expt1 |
| FYEAFSK               | 1  | 40556608                                                                                      | N-Term(iTRAQ4plex), K7(iTRAQ4plex)                                  | 1179.64031 | 41 |    |      |      | Expt1 |
| GLEEQQAQAGQCPSEGR     | 3  | 19527130                                                                                      | N-Term(iTRAQ4plex), C12(Methylthio)                                 | 2019.93682 | 41 | 48 |      | 4.23 | Expt1 |
| FEAVEYK               | 3  | 20892419;127139206;157057148;127139277;13384636;127139202                                     | N-Term(iTRAQ4plex), K7(iTRAQ4plex)                                  | 1173.64348 | 41 | 46 |      | 2.97 | Expt1 |
| DMDLIDVNEAFAPQFLSVQK  | 5  | 29126205                                                                                      | N-Term(iTRAQ4plex), M2(Oxidation), K20(iTRAQ4plex)                  | 2584.32456 | 41 | 63 |      | 5.11 | Expt1 |
| LNMEAINYMAADGDFK      | 10 | 6678682                                                                                       | N-Term(iTRAQ4plex), M9(Oxidation), K16(iTRAQ4plex)                  | 2107.01323 | 41 | 78 |      | 4.10 | Expt1 |
| FILLEK                | 4  | 124486943;226423931                                                                           | N-Term(iTRAQ4plex), K6(iTRAQ4plex)                                  | 1050.68987 | 41 | 40 |      |      | Expt1 |
| MAPQLDNDPSPQQISINSEAR | 3  | 117647249                                                                                     | N-Term(iTRAQ4plex)                                                  | 2542.23429 | 41 | 58 |      | 3.36 | Expt1 |
| FQSLGVAFYR            | 8  | 148747526                                                                                     | N-Term(iTRAQ4plex)                                                  | 1331.72380 | 41 | 53 |      | 3.80 | Expt1 |
| ALLFVPR               | 6  | 6754254                                                                                       | N-Term(iTRAQ4plex)                                                  | 959.61913  | 41 | 34 |      | 3.05 | Expt1 |
| WDVTQEPYNR            | 2  | 167736365                                                                                     | N-Term(iTRAQ4plex)                                                  | 1451.70464 | 41 |    |      | 3.37 | Expt1 |
| QAGPASVPLR            | 5  | 112293264                                                                                     | N-Term(iTRAQ4plex)                                                  | 1139.66753 | 41 | 37 |      | 3.45 | Expt1 |
| SYQDPSNAQFLESIR       | 5  | 38198665                                                                                      | N-Term(iTRAQ4plex)                                                  | 1898.93450 | 41 | 76 |      | 3.41 | Expt1 |
| VQAVVAVAR             | 5  | 117938332;117938334                                                                           | N-Term(iTRAQ4plex)                                                  | 1056.66557 | 41 | 47 |      | 3.31 | Expt1 |
| EIEELQSQAQALSQEGK     | 3  | 117938332;117938334                                                                           | N-Term(iTRAQ4plex), K17(iTRAQ4plex)                                 | 2176.13724 | 41 | 66 |      | 4.85 | Expt1 |
| AAGCCEEMR             | 17 | 88196773                                                                                      | N-Term(iTRAQ4plex), C4(Methylthio), C5(Methylthio)                  | 1205.43523 | 41 | 49 |      | 3.60 | Expt1 |
| MVVSFNR               | 1  | 118344444                                                                                     | N-Term(iTRAQ4plex)                                                  | 996.54265  | 41 |    |      |      | Expt1 |
| NVQAEEMVEFSSGLK       | 7  | 6680748                                                                                       | N-Term(iTRAQ4plex), M7(Oxidation), K15(iTRAQ4plex)                  | 1972.00083 | 41 | 41 |      | 4.56 | Expt1 |
| QEPLNGAMPCCPLEER      | 3  | 85701802                                                                                      | N-Term(iTRAQ4plex), N5(Deamidated), C10(Methylthio)                 | 1897.88884 | 41 | 52 |      | 3.51 | Expt1 |
| DAEDAMDGDGAVLDGR      | 6  | 6755478                                                                                       | N-Term(iTRAQ4plex), M6(Oxidation)                                   | 1911.82029 | 41 | 43 |      | 3.81 | Expt1 |
| IGYPAPNFK             | 3  | 94400195;149267887;6754976                                                                    | N-Term(iTRAQ4plex), K9(iTRAQ4plex)                                  | 1294.75298 | 41 | 40 |      | 3.12 | Expt1 |
| VVFQEFR               | 3  | 114326446                                                                                     | N-Term(iTRAQ4plex)                                                  | 1068.59490 | 41 |    |      | 2.85 | Expt1 |
| VADGLPLAASMQEDEQSGR   | 11 | 6755448                                                                                       | N-Term(iTRAQ4plex)                                                  | 2118.02788 | 41 | 67 |      | 4.48 | Expt1 |
| LAVYIDR               | 1  | 162287370;161760667                                                                           | N-Term(iTRAQ4plex)                                                  | 993.58556  | 41 |    |      |      | Expt1 |
| SFEDTIAQGITFVK        | 7  | 83921612                                                                                      | N-Term(iTRAQ4plex), K14(iTRAQ4plex)                                 | 1844.00846 | 41 | 46 |      | 3.82 | Expt1 |
| VIMPCNWWWAR           | 3  | 11968164                                                                                      | N-Term(iTRAQ4plex), C5(Methylthio)                                  | 1564.77410 | 41 | 45 |      | 3.14 | Expt1 |
| GDQGPVGR              | 8  | 111120329                                                                                     | N-Term(iTRAQ4plex)                                                  | 929.49303  | 41 | 42 |      |      | Expt1 |
| FGYVDFESAEDLEK        | 4  | 84875537                                                                                      | N-Term(iTRAQ4plex), K14(iTRAQ4plex)                                 | 1936.95256 | 41 | 73 |      | 3.99 | Expt1 |
| AALSYFPR              | 9  | 86439989                                                                                      | N-Term(iTRAQ4plex)                                                  | 1068.59746 | 41 |    |      | 3.16 | Expt1 |
| DPGVLDLR              | 1  | 149263303;21886811                                                                            | N-Term(iTRAQ4plex)                                                  | 915.50261  | 41 |    |      |      | Expt1 |
| LICCDILDVLDK          | 3  | 226874906                                                                                     | N-Term(iTRAQ4plex), C3(Methylthio), C4(Methylthio), K12(iTRAQ4plex) | 1742.88420 | 41 | 95 |      | 4.27 | Expt1 |
| LVVPASQCGSLIGK        | 12 | 157042772;157041229;157057549;171906586                                                       | N-Term(iTRAQ4plex), C8(Methylthio), K14(iTRAQ4plex)                 | 1705.96306 | 41 | 83 | 1.22 | 3.80 | Expt1 |
| GFQEVPVTPNIFNSR       | 8  | 27229277                                                                                      | N-Term(iTRAQ4plex)                                                  | 1751.92351 | 41 | 67 |      | 3.70 | Expt1 |
| NNLAGAEELFAR          | 12 | 51491845                                                                                      | N-Term(iTRAQ4plex), N1(Deamidated)                                  | 1449.74736 | 41 | 65 |      | 4.09 | Expt1 |
| IFDEILVNAADNK         | 2  | 34328148;153945749                                                                            | N-Term(iTRAQ4plex), K13(iTRAQ4plex)                                 | 1749.96915 | 41 | 58 |      |      | Expt1 |
| GQLEANLLQVLEK         | 3  | 124249090                                                                                     | N-Term(iTRAQ4plex), K13(iTRAQ4plex)                                 | 1743.03238 | 41 | 46 |      | 3.42 | Expt1 |
| NNFSDLGQSWGPNPTPGFSR  | 2  | 161484644                                                                                     | N-Term(iTRAQ4plex)                                                  | 2322.10837 | 41 |    |      | 4.33 | Expt1 |
| SQDVGFWEGEVVR         | 3  | 158518433;165905585                                                                           | N-Term(iTRAQ4plex)                                                  | 1651.82170 | 41 | 47 |      | 4.54 | Expt1 |

|                                  |    |                                                                                                     |                                                     |            |    |     |      |       |
|----------------------------------|----|-----------------------------------------------------------------------------------------------------|-----------------------------------------------------|------------|----|-----|------|-------|
| ISALEGYR                         | 2  | 219276601;219275596                                                                                 | N-Term(iTRAQ4plex)                                  | 1052.58696 | 41 |     | 3.06 | Expt1 |
| AMTGVEQWPYR                      | 3  | 6753320                                                                                             | N-Term(iTRAQ4plex)                                  | 1481.73369 | 41 | 54  | 3.39 | Expt1 |
| ELGSLPLPLSASEQR                  | 5  | 19527102                                                                                            | N-Term(iTRAQ4plex)                                  | 1740.96164 | 41 | 46  | 3.04 | Expt1 |
| GVISTPVIR                        | 2  | 126090857                                                                                           | N-Term(iTRAQ4plex)                                  | 1085.68022 | 41 | 33  |      | Expt1 |
| LIGWGQIR                         | 1  | 149271434;149274434;6753738;7242148                                                                 | N-Term(iTRAQ4plex)                                  | 1086.65947 | 41 |     |      | Expt1 |
| IIFEDDR                          | 1  | 33468857                                                                                            | N-Term(iTRAQ4plex)                                  | 1051.55474 | 41 |     |      | Expt1 |
| EGILFK                           | 1  | 6678143                                                                                             | N-Term(iTRAQ4plex), K7(iTRAQ4plex)                  | 1107.70012 | 41 |     |      | Expt1 |
| GLCSGPGAGEESPAATLPR              | 5  | 226442772                                                                                           | N-Term(iTRAQ4plex), C3(Methylthio)                  | 1959.94121 | 41 | 66  | 5.58 | Expt1 |
| VGYTPDWIFLLR                     | 7  | 51491845                                                                                            | N-Term(iTRAQ4plex)                                  | 1623.90434 | 41 | 57  | 4.48 | Expt1 |
| SSEMNVLIPTEGGDFNEFPVPEQFK        | 7  | 157951604                                                                                           | N-Term(iTRAQ4plex), M4(Oxidation), K25(iTRAQ4plex)  | 3115.51975 | 41 | 45  | 4.44 | Expt1 |
| TTSLELFMYLNEVAGK                 | 3  | 6996911                                                                                             | N-Term(iTRAQ4plex), M8(Oxidation), K16(iTRAQ4plex)  | 2120.12253 | 41 | 55  | 3.68 | Expt1 |
| NECDPALALLSDYVLHNSNTMR           | 2  | 19882201                                                                                            | N-Term(iTRAQ4plex), C3(Methylthio), M21(Oxidation)  | 2682.25614 | 41 |     | 3.76 | Expt1 |
| AYDLPGDFLTQALTQR                 | 2  | 227330590                                                                                           | N-Term(iTRAQ4plex)                                  | 1953.02451 | 41 |     | 3.42 | Expt1 |
| TMEIELEGLK                       | 4  | 148747546                                                                                           | N-Term(iTRAQ4plex), K10(iTRAQ4plex)                 | 1450.81938 | 41 | 68  | 3.61 | Expt1 |
| VLPPPAGYVPIR                     | 2  | 153791358                                                                                           | N-Term(iTRAQ4plex)                                  | 1422.86125 | 41 |     | 2.96 | Expt1 |
| MVATGVCR                         | 15 | 6724311                                                                                             | N-Term(iTRAQ4plex), C7(Methylthio)                  | 1026.50115 | 41 | 38  | 3.05 | Expt1 |
| PPYTIYVFPVR                      | 6  | 10092608                                                                                            | N-Term(iTRAQ4plex)                                  | 1495.84429 | 41 | 50  |      | Expt1 |
| INFDDNAEFR                       | 3  | 165972309                                                                                           | N-Term(iTRAQ4plex)                                  | 1384.66179 | 41 | 39  | 2.99 | Expt1 |
| GFNEGLWEIENNPGVK                 | 5  | 34787412                                                                                            | N-Term(iTRAQ4plex), K16(iTRAQ4plex)                 | 2091.07720 | 40 | 71  | 4.05 | Expt1 |
| LAVNMVPPFR                       | 4  | 33859488;31981939;7106439;2165384;21746161;149253488;149253527;83030206;124430500;27754056;12963615 | N-Term(iTRAQ4plex), M5(Oxidation)                   | 1303.73296 | 40 | 42  | 2.89 | Expt1 |
| GPQVQQPPPSNR                     | 3  | 67906177                                                                                            | N-Term(iTRAQ4plex)                                  | 1448.77202 | 40 | 37  | 3.21 | Expt1 |
| VALVYQMNNEPPGAR                  | 5  | 31980648                                                                                            | N-Term(iTRAQ4plex), Q7(Deamidated)                  | 1746.91692 | 40 | 48  | 4.57 | Expt1 |
| YIEVFK                           | 2  | 19527048                                                                                            | N-Term(iTRAQ4plex), K6(iTRAQ4plex)                  | 1086.63567 | 40 | 40  |      | Expt1 |
| FFFDVGCNK                        | 4  | 6755252                                                                                             | N-Term(iTRAQ4plex), C7(Methylthio), K9(iTRAQ4plex)  | 1410.68315 | 40 | 74  | 3.02 | Expt1 |
| DFLLQQTMLR                       | 5  | 165932331                                                                                           | N-Term(iTRAQ4plex)                                  | 1408.77898 | 40 | 45  | 3.41 | Expt1 |
| NSYDEEIIISK                      | 3  | 82950147;149264086                                                                                  | N-Term(iTRAQ4plex), K11(iTRAQ4plex)                 | 1598.84355 | 40 | 60  | 3.83 | Expt1 |
| GLGLSPDLVVCR                     | 4  | 172072613                                                                                           | N-Term(iTRAQ4plex), C11(Methylthio)                 | 1418.76311 | 40 | 56  | 4.05 | Expt1 |
| IIEPAQVAEVEPLPEDYTRPVNLTETVTLQQR | 2  | 13385798                                                                                            | N-Term(iTRAQ4plex)                                  | 3914.03115 | 40 |     | 4.12 | Expt1 |
| ALSIYEALGGQDPNVAK                | 3  | 22122725                                                                                            | N-Term(iTRAQ4plex), K18(iTRAQ4plex)                 | 2131.16874 | 40 | 48  | 3.89 | Expt1 |
| DNFTAIEPGTNGVEER                 | 7  | 209862992;6681219                                                                                   | N-Term(iTRAQ4plex), N11(Deamidated)                 | 1893.89214 | 40 | 61  | 4.07 | Expt1 |
| NVEDLSGGELQR                     | 2  | 114205431                                                                                           | N-Term(iTRAQ4plex)                                  | 1460.74626 | 40 | 36  |      | Expt1 |
| ISMPEIDLNLK                      | 11 | 61743961                                                                                            | N-Term(iTRAQ4plex), K11(iTRAQ4plex)                 | 1560.89800 | 40 | 75  | 3.61 | Expt1 |
| DDGVFVQEVQMNSPAAR                | 12 | 90403607;61743961                                                                                   | N-Term(iTRAQ4plex), M10(Oxidation)                  | 2022.97002 | 40 | 73  | 4.18 | Expt1 |
| LQQTQNVQDEVVDIMR                 | 15 | 6678553                                                                                             | N-Term(iTRAQ4plex)                                  | 2060.05864 | 40 | 107 | 5.42 | Expt1 |
| QVCEQLISGQMSR                    | 25 | 111074529                                                                                           | N-Term(iTRAQ4plex), C3(Methylthio), M11(Oxidation)  | 1684.79753 | 40 | 60  | 4.95 | Expt1 |
| DFADMPNLR                        | 9  | 6679166                                                                                             | N-Term(iTRAQ4plex), M5(Oxidation)                   | 1238.59587 | 40 | 40  | 3.04 | Expt1 |
| TLIPDSYR                         | 2  | 225637487                                                                                           | N-Term(iTRAQ4plex)                                  | 1108.61260 | 40 | 37  |      | Expt1 |
| TGSQYDIQDAIDK                    | 3  | 82950147;82950149;149264086                                                                         | N-Term(iTRAQ4plex), K13(iTRAQ4plex)                 | 1741.88420 | 40 | 74  | 4.55 | Expt1 |
| VTIMWTPPDSVVSQYR                 | 7  | 46849812                                                                                            | N-Term(iTRAQ4plex)                                  | 1952.01091 | 40 | 50  | 3.66 | Expt1 |
| LLDFGSLSNLQVTQPTVGMNFK           | 7  | 149261626;149261791;6677801                                                                         | N-Term(iTRAQ4plex), M19(Oxidation), K22(iTRAQ4plex) | 2713.45823 | 40 | 83  | 4.28 | Expt1 |
| GNLAVNALSNNTTPGK                 | 3  | 149267092;6857757                                                                                   | N-Term(iTRAQ4plex), N6(Deamidated), K16(iTRAQ4plex) | 1860.00957 | 40 | 79  | 3.80 | Expt1 |
| NALCAPEVISLINSR                  | 3  | 158533976                                                                                           | N-Term(iTRAQ4plex), C4(Methylthio)                  | 1789.94345 | 40 | 48  | 3.25 | Expt1 |
| GSTGPAGIR                        | 19 | 111120329                                                                                           | N-Term(iTRAQ4plex)                                  | 959.53880  | 40 | 46  | 3.64 | Expt1 |
| GFPGYMYTDLATIYER                 | 10 | 19527064;19705578                                                                                   | N-Term(iTRAQ4plex)                                  | 2040.99297 | 40 | 64  | 3.66 | Expt1 |
| EAGDVCYADVYR                     | 12 | 149262253;118582271                                                                                 | N-Term(iTRAQ4plex), C6(Methylthio)                  | 1550.67583 | 40 | 67  | 4.18 | Expt1 |
| LVIEEAER                         | 4  | 6753322                                                                                             | N-Term(iTRAQ4plex)                                  | 1102.62114 | 40 | 36  | 2.87 | Expt1 |
| WNGNEDMIDQDDLYER                 | 3  | 13385294                                                                                            | N-Term(iTRAQ4plex)                                  | 2156.93071 | 40 | 89  | 4.48 | Expt1 |
| LCYVGYNIEQEQK                    | 3  | 22122825                                                                                            | N-Term(iTRAQ4plex), C2(Methylthio), K13(iTRAQ4plex) | 1920.94512 | 40 | 79  | 4.76 | Expt1 |
| CEMEAQNQEYNMLLDIK                | 8  | 226823220                                                                                           | N-Term(iTRAQ4plex), C1(Methylthio), K17(iTRAQ4plex) | 2406.11423 | 40 | 52  | 3.81 | Expt1 |

|                     |    |                                                                                                                                                                                  |                                     |            |    |    |  |      |       |
|---------------------|----|----------------------------------------------------------------------------------------------------------------------------------------------------------------------------------|-------------------------------------|------------|----|----|--|------|-------|
| FASFIDK             | 15 | 29789317;47059013;124487419;51092301;85701680;20911031;22164776;51092295;133778953;14861854;54607171;113195684;51092293;114145561;9910294;126116585;47523977;225903444;269914154 | N-Term(iTRAQ4plex), K7(iTRAQ4plex)  | 1115.64397 | 40 | 55 |  | 2.94 | Expt1 |
| VLDLDFR             | 5  | 33468931                                                                                                                                                                         | N-Term(iTRAQ4plex)                  | 1134.66680 | 40 | 54 |  |      | Expt1 |
| YPQLLSGIR           | 4  | 149267883                                                                                                                                                                        | N-Term(iTRAQ4plex)                  | 1190.70183 | 40 | 48 |  |      | Expt1 |
| VLTEIIASR           | 3  | 6753060                                                                                                                                                                          | N-Term(iTRAQ4plex)                  | 1145.70305 | 40 | 47 |  | 3.04 | Expt1 |
| SPLLEIVER           | 5  | 149257637;62990169                                                                                                                                                               | N-Term(iTRAQ4plex)                  | 1199.71269 | 40 | 46 |  | 3.10 | Expt1 |
| FLSEMMLK            | 2  | 82950147;82950149;149264086                                                                                                                                                      | N-Term(iTRAQ4plex), K7(iTRAQ4plex)  | 1155.67827 | 40 | 43 |  |      | Expt1 |
| LEETLPVIR           | 2  | 12025542                                                                                                                                                                         | N-Term(iTRAQ4plex)                  | 1213.72966 | 40 | 42 |  |      | Expt1 |
| VAVVNIQAR           | 8  | 117938332;117938334                                                                                                                                                              | N-Term(iTRAQ4plex)                  | 1113.68791 | 40 | 41 |  | 3.11 | Expt1 |
| DIFPIAFPR           | 2  | 116089322                                                                                                                                                                        | N-Term(iTRAQ4plex)                  | 1219.69841 | 40 | 39 |  |      | Expt1 |
| LIPDDVMTR           | 2  | 23956104                                                                                                                                                                         | N-Term(iTRAQ4plex)                  | 1203.65483 | 40 | 38 |  |      | Expt1 |
| WLAIANAR            | 4  | 88014720                                                                                                                                                                         | N-Term(iTRAQ4plex)                  | 1173.64983 | 40 | 38 |  |      | Expt1 |
| MWVFSNLR            | 3  | 12963685                                                                                                                                                                         | N-Term(iTRAQ4plex)                  | 1196.64104 | 40 | 37 |  | 2.89 | Expt1 |
| ALVDGPCTR           | 2  | 149257159;13385472                                                                                                                                                               | N-Term(iTRAQ4plex), C7(Methylthio)  | 1121.55705 | 40 | 33 |  |      | Expt1 |
| LSPEELLLR           | 2  | 21704120;262050551;31543113;85986577                                                                                                                                             | N-Term(iTRAQ4plex)                  | 1213.72820 | 40 |    |  | 3.19 | Expt1 |
| TLAEINANR           | 1  | 6753658                                                                                                                                                                          | N-Term(iTRAQ4plex)                  | 1145.64202 | 40 |    |  |      | Expt1 |
| IPQTVLWR            | 1  | 145699137;145864477;145699099;33186906;145864463;32526871;47059123                                                                                                               | N-Term(iTRAQ4plex)                  | 1156.70122 | 40 |    |  |      | Expt1 |
| GTVVTGTLER          | 1  | 149258822;27370092                                                                                                                                                               | N-Term(iTRAQ4plex)                  | 1176.66973 | 40 |    |  |      | Expt1 |
| IWDIGGQPR           | 2  | 13385518;23956194                                                                                                                                                                | N-Term(iTRAQ4plex)                  | 1185.64958 | 40 |    |  |      | Expt1 |
| LLLAIMESR           | 2  | 61102728;146198792;60592758;60593032                                                                                                                                             | N-Term(iTRAQ4plex)                  | 1189.70989 | 40 |    |  |      | Expt1 |
| TLGILGLGR           | 6  | 52353955                                                                                                                                                                         | N-Term(iTRAQ4plex)                  | 1043.67119 | 40 | 51 |  | 2.93 | Expt1 |
| ITNYGIEK            | 3  | 6680554                                                                                                                                                                          | N-Term(iTRAQ4plex), K8(iTRAQ4plex)  | 1225.71404 | 40 | 47 |  | 3.48 | Expt1 |
| YADLPGIAR           | 2  | 28076935                                                                                                                                                                         | N-Term(iTRAQ4plex)                  | 1119.62895 | 40 | 39 |  |      | Expt1 |
| LQQTQNVDEVVDIMR     | 3  | 6678553                                                                                                                                                                          | N-Term(iTRAQ4plex), M15(Oxidation)  | 2076.05289 | 40 | 64 |  | 4.44 | Expt1 |
| NFPDLDR             | 1  | 149258807;22203763                                                                                                                                                               | N-Term(iTRAQ4plex), N1(Deamidated)  | 1021.51007 | 40 |    |  |      | Expt1 |
| DFMIQGGDFTR         | 5  | 71774133                                                                                                                                                                         | N-Term(iTRAQ4plex), M3(Oxidation)   | 1446.68218 | 40 | 45 |  | 2.94 | Expt1 |
| TPPSEEDSAEAEER      | 3  | 21313588                                                                                                                                                                         | N-Term(iTRAQ4plex)                  | 1561.71172 | 40 | 37 |  | 2.95 | Expt1 |
| NTIEETGILAER        | 3  | 153791270                                                                                                                                                                        | N-Term(iTRAQ4plex)                  | 1489.79961 | 40 | 37 |  | 3.85 | Expt1 |
| YLGINSDDLGVGR       | 3  | 225543552                                                                                                                                                                        | N-Term(iTRAQ4plex)                  | 1506.84245 | 40 | 50 |  | 3.37 | Expt1 |
| IEDFLER             | 7  | 33504483                                                                                                                                                                         | N-Term(iTRAQ4plex)                  | 1065.57195 | 40 |    |  | 3.24 | Expt1 |
| EDELQAALLR          | 2  | 29336026                                                                                                                                                                         | N-Term(iTRAQ4plex)                  | 1301.72136 | 40 |    |  | 3.43 | Expt1 |
| LVQLLVK             | 7  | 28395018                                                                                                                                                                         | N-Term(iTRAQ4plex), K7(iTRAQ4plex)  | 1100.77556 | 40 | 56 |  | 3.01 | Expt1 |
| EVSTPANQR           | 5  | 111074529                                                                                                                                                                        | N-Term(iTRAQ4plex)                  | 1145.60539 | 40 | 39 |  | 2.85 | Expt1 |
| VLFLIPK             | 4  | 89337277;21703922;19526920                                                                                                                                                       | N-Term(iTRAQ4plex), K7(iTRAQ4plex)  | 1117.77141 | 40 | 36 |  | 2.94 | Expt1 |
| EQNSPIYISR          | 3  | 6755973;6755971;86991442;85701728                                                                                                                                                | N-Term(iTRAQ4plex)                  | 1350.71648 | 40 |    |  | 3.81 | Expt1 |
| DGGQTAPASIR         | 3  | 28916693                                                                                                                                                                         | N-Term(iTRAQ4plex)                  | 1216.64311 | 40 | 77 |  | 3.50 | Expt1 |
| FWANFAR             | 1  | 149259017;124487013;21450339;117553604;19526804;162287349                                                                                                                        | N-Term(iTRAQ4plex)                  | 1055.55461 | 40 |    |  |      | Expt1 |
| LVPVGYGIR           | 1  | 56699438;54287684                                                                                                                                                                | N-Term(iTRAQ4plex)                  | 1117.68718 | 40 |    |  |      | Expt1 |
| SSLNPIFR            | 4  | 46195798                                                                                                                                                                         | N-Term(iTRAQ4plex)                  | 1190.70378 | 40 | 48 |  | 3.50 | Expt1 |
| DTVDPVQDEMLAR       | 5  | 172088119                                                                                                                                                                        | N-Term(iTRAQ4plex)                  | 1632.80852 | 40 | 64 |  | 3.80 | Expt1 |
| ALASNLR             | 7  | 163310769                                                                                                                                                                        | N-Term(iTRAQ4plex)                  | 888.54016  | 40 | 47 |  | 3.14 | Expt1 |
| GYFDEDMNSILADPGDDTK | 3  | 37537522                                                                                                                                                                         | N-Term(iTRAQ4plex), K19(iTRAQ4plex) | 2391.09427 | 40 | 34 |  | 2.86 | Expt1 |
| LVDAGIESR           | 2  | 115647999                                                                                                                                                                        | N-Term(iTRAQ4plex)                  | 1103.61687 | 40 |    |  | 2.86 | Expt1 |
| ALEIIPR             | 1  | 238814391                                                                                                                                                                        | N-Term(iTRAQ4plex)                  | 955.60631  | 40 |    |  |      | Expt1 |



|                      |    |                                                                                                |                                                                     |            |    |    |      |       |
|----------------------|----|------------------------------------------------------------------------------------------------|---------------------------------------------------------------------|------------|----|----|------|-------|
| SVIDPIPAVGDNSVDSGAK  | 3  | 46559406                                                                                       | N-Term(iTRAQ4plex), K20(iTRAQ4plex)                                 | 2226.19278 | 40 | 64 | 4.83 | Expt1 |
| IMGPEDEQMGLLR        | 4  | 114326446                                                                                      | N-Term(iTRAQ4plex), M2(Oxidation)                                   | 1761.90520 | 40 | 47 | 3.66 | Expt1 |
| LPSLAFLYMEK          | 15 | 229608920                                                                                      | N-Term(iTRAQ4plex), M9(Oxidation), K11(iTRAQ4plex)                  | 1615.90573 | 40 | 52 | 4.05 | Expt1 |
| EGNGTVMGAEIR         | 18 | 33620739;94363353;149252094;149252164;94383790;149265610;149266035;29789016;33563264;164664497 | N-Term(iTRAQ4plex), N3(Deamidated)                                  | 1378.67925 | 40 | 66 | 3.80 | Expt1 |
| GTSLSEEAAPPSLPEK     | 6  | 161484644                                                                                      | N-Term(iTRAQ4plex), K16(iTRAQ4plex)                                 | 1901.01152 | 40 | 80 | 3.83 | Expt1 |
| ALLQAILQTEDMLK       | 9  | 82950147;82950149;149264086                                                                    | N-Term(iTRAQ4plex), M12(Oxidation), K14(iTRAQ4plex)                 | 1891.08391 | 40 | 79 | 4.72 | Expt1 |
| YSEIEPSTEGEVIYR      | 5  | 31982223                                                                                       | N-Term(iTRAQ4plex)                                                  | 1915.93682 | 40 | 63 | 3.61 | Expt1 |
| LQPQITMPPSAQPPR      | 4  | 110630015;34486094                                                                             | N-Term(iTRAQ4plex)                                                  | 1918.07169 | 40 | 42 | 3.21 | Expt1 |
| AILAELTGR            | 2  | 6679261                                                                                        | N-Term(iTRAQ4plex)                                                  | 1087.66045 | 40 |    | 2.85 | Expt1 |
| EIISEVQR             | 1  | 147907212;206597526;148223355                                                                  | N-Term(iTRAQ4plex)                                                  | 1117.63176 | 40 |    |      | Expt1 |
| IEDENDNYPIFTQK       | 3  | 7305007                                                                                        | N-Term(iTRAQ4plex), K14(iTRAQ4plex)                                 | 2014.00237 | 40 | 80 | 4.94 | Expt1 |
| QSSVSFR              | 2  | 20911031                                                                                       | N-Term(iTRAQ4plex)                                                  | 954.51402  | 40 |    | 3.00 | Expt1 |
| SEPDLYCDPR           | 5  | 9790161                                                                                        | N-Term(iTRAQ4plex), C7(Methylthio)                                  | 1384.60088 | 40 | 42 | 3.30 | Expt1 |
| VLVDVSNNR            | 1  | 31981509                                                                                       | N-Term(iTRAQ4plex)                                                  | 1159.65618 | 40 |    |      | Expt1 |
| ASVVTLPVYLNFR        | 9  | 134288917                                                                                      | N-Term(iTRAQ4plex)                                                  | 1723.99101 | 40 | 71 | 4.00 | Expt1 |
| TTDGYLLR             | 6  | 94395665;149265827;254553321                                                                   | N-Term(iTRAQ4plex)                                                  | 1082.59734 | 40 |    | 3.19 | Expt1 |
| TVEVPEDEVVR          | 5  | 31982233                                                                                       | N-Term(iTRAQ4plex)                                                  | 1415.75041 | 40 | 59 | 3.59 | Expt1 |
| EGIVALR              | 1  | 6753324                                                                                        | N-Term(iTRAQ4plex)                                                  | 901.56084  | 40 |    |      | Expt1 |
| LGMTDAFGGR           | 4  | 6678097;255759941                                                                              | N-Term(iTRAQ4plex)                                                  | 1168.59172 | 40 | 54 | 3.60 | Expt1 |
| LNLDISIIGR           | 6  | 13994195                                                                                       | N-Term(iTRAQ4plex)                                                  | 1144.68303 | 40 | 47 | 3.44 | Expt1 |
| YPPPTLLELDQPLPVSALR  | 3  | 40018610                                                                                       | N-Term(iTRAQ4plex)                                                  | 2263.28830 | 40 | 33 | 4.19 | Expt1 |
| IAQITGPPDR           | 3  | 84662730                                                                                       | N-Term(iTRAQ4plex)                                                  | 1211.68987 | 40 |    | 2.98 | Expt1 |
| AVQLYQQTANVFENEER    | 3  | 110625902                                                                                      | N-Term(iTRAQ4plex)                                                  | 2183.08573 | 40 | 55 | 4.00 | Expt1 |
| EFNGLGDCLTK          | 5  | 148747424                                                                                      | N-Term(iTRAQ4plex), N3(Deamidated), C8(Methylthio), K11(iTRAQ4plex) | 1531.73979 | 40 | 59 | 3.88 | Expt1 |
| VLAGETLSVNDPPDVLDR   | 4  | 111607430;111607434;111607432;111607436                                                        | N-Term(iTRAQ4plex)                                                  | 2054.09307 | 40 | 82 | 4.51 | Expt1 |
| TPQAPTANLVVGR        | 3  | 149269060;126157504                                                                            | N-Term(iTRAQ4plex)                                                  | 1661.94829 | 40 | 63 | 3.74 | Expt1 |
| ALTDAGCNLSPLQYIK     | 3  | 58037481                                                                                       | N-Term(iTRAQ4plex), C7(Methylthio), K16(iTRAQ4plex)                 | 2041.07187 | 40 | 53 | 3.68 | Expt1 |
| VSYFPTVPVYIVSTK      | 6  | 145966915                                                                                      | N-Term(iTRAQ4plex), K16(iTRAQ4plex)                                 | 2045.15769 | 40 | 50 | 4.25 | Expt1 |
| ICILEPETGNDMSPYEAYK  | 8  | 111185907                                                                                      | N-Term(iTRAQ4plex), C2(Methylthio), K19(iTRAQ4plex)                 | 2507.18193 | 40 | 73 | 3.86 | Expt1 |
| DYIWNTLNSGR          | 2  | 13385942                                                                                       | N-Term(iTRAQ4plex)                                                  | 1482.74834 | 40 |    | 3.48 | Expt1 |
| IILTAQFFR            | 3  | 6679891                                                                                        | N-Term(iTRAQ4plex)                                                  | 1202.73955 | 40 |    | 2.92 | Expt1 |
| DVEPEDPMLMDPFAHR     | 3  | 21703770                                                                                       | N-Term(iTRAQ4plex)                                                  | 2303.10477 | 40 | 44 | 4.22 | Expt1 |
| DDLLGFSLR            | 4  | 149258641;149258643;54292132                                                                   | N-Term(iTRAQ4plex)                                                  | 1179.65044 | 40 | 39 | 2.90 | Expt1 |
| AVTGYDPTYGDISLFGAMQR | 5  | 37537522                                                                                       | N-Term(iTRAQ4plex), M20(Oxidation)                                  | 2622.27243 | 39 | 78 | 4.51 | Expt1 |
| EAELELLK             | 6  | 149253386                                                                                      | N-Term(iTRAQ4plex), K7(iTRAQ4plex)                                  | 1103.70183 | 39 | 44 | 3.28 | Expt1 |
| LTLALIDGK            | 12 | 6755963;6755967                                                                                | N-Term(iTRAQ4plex), K10(iTRAQ4plex)                                 | 1318.82842 | 39 | 93 | 3.93 | Expt1 |
| ALAVGGLGSIIR         | 5  | 21312654                                                                                       | N-Term(iTRAQ4plex)                                                  | 1270.79936 | 39 | 74 | 3.12 | Expt1 |
| SPVYLTVLK            | 3  | 68226731                                                                                       | N-Term(iTRAQ4plex), K9(iTRAQ4plex)                                  | 1307.82280 | 39 | 66 | 3.34 | Expt1 |
| VVFTPSICK            | 3  | 46249419;46249421                                                                              | N-Term(iTRAQ4plex), C8(Methylthio), K9(iTRAQ4plex)                  | 1327.73381 | 39 | 58 | 3.16 | Expt1 |
| FLEEIMTK             | 3  | 149259047;31981382                                                                             | N-Term(iTRAQ4plex), K8(iTRAQ4plex)                                  | 1298.73760 | 39 | 55 | 3.05 | Expt1 |
| IWSVLESPPR           | 10 | 33469047                                                                                       | N-Term(iTRAQ4plex)                                                  | 1230.69951 | 39 | 54 | 3.32 | Expt1 |
| DTGNLYCTGR           | 12 | 7305007                                                                                        | N-Term(iTRAQ4plex), C7(Methylthio)                                  | 1289.57463 | 39 | 53 | 3.63 | Expt1 |
| IANPVEGSSGR          | 4  | 6754994                                                                                        | N-Term(iTRAQ4plex)                                                  | 1230.65532 | 39 | 51 |      | Expt1 |
| ELVLDNCK             | 2  | 149253242;18700032;40254600                                                                    | N-Term(iTRAQ4plex), C7(Methylthio), K8(iTRAQ4plex)                  | 1267.65788 | 39 | 51 |      | Expt1 |
| DVIEEYFK             | 2  | 149257324;149250091;149258592;149258678;51768484;149272169;51772387;83003650                   | N-Term(iTRAQ4plex), K8(iTRAQ4plex)                                  | 1330.71941 | 39 | 50 |      | Expt1 |
| LFCVGFVK             | 8  | 149265827;254553321                                                                            | N-Term(iTRAQ4plex), C3(Methylthio), K8(iTRAQ4plex)                  | 1248.66924 | 39 | 49 | 2.92 | Expt1 |

|                     |   |                                                                                       |                                     |            |    |    |  |      |       |
|---------------------|---|---------------------------------------------------------------------------------------|-------------------------------------|------------|----|----|--|------|-------|
| VLITGATGLLGR        | 6 | 19527234                                                                              | N-Term(iTRAQ4plex)                  | 1314.82353 | 39 | 46 |  | 3.05 | Expt1 |
| ALLSPTFTSGR         | 3 | 149274500;28893549;6681115                                                            | N-Term(iTRAQ4plex)                  | 1293.72991 | 39 | 44 |  | 2.98 | Expt1 |
| FVSGPPQVIR          | 3 | 158854020;158854022                                                                   | N-Term(iTRAQ4plex)                  | 1243.72930 | 39 | 43 |  |      | Expt1 |
| IIGNTENLVR          | 5 | 149258641;149258643;54292132                                                          | N-Term(iTRAQ4plex)                  | 1272.74016 | 39 | 42 |  | 2.93 | Expt1 |
| MLLFTEVTR           | 7 | 116089273                                                                             | N-Term(iTRAQ4plex)                  | 1253.70647 | 39 | 42 |  | 2.92 | Expt1 |
| GYPTELLWFR          | 4 | 83921612                                                                              | N-Term(iTRAQ4plex)                  | 1296.72466 | 39 | 41 |  | 2.94 | Expt1 |
| ALVEEALAGR          | 3 | 11096332                                                                              | N-Term(iTRAQ4plex)                  | 1243.71391 | 39 | 40 |  | 2.94 | Expt1 |
| ETALLIDPK           | 2 | 68226731                                                                              | N-Term(iTRAQ4plex), K9(iTRAQ4plex)  | 1287.77788 | 39 | 34 |  |      | Expt1 |
| GLSGTATLELR         | 2 | 227499103;227499234                                                                   | N-Term(iTRAQ4plex)                  | 1261.72063 | 39 |    |  | 2.87 | Expt1 |
| IIPEIQK             | 2 | 12963737                                                                              | N-Term(iTRAQ4plex), K8(iTRAQ4plex)  | 1241.81462 | 39 |    |  |      | Expt1 |
| DIVENYFMR           | 1 | 170295840                                                                             | N-Term(iTRAQ4plex)                  | 1330.66203 | 39 |    |  |      | Expt1 |
| LLNQPNQWPLVK        | 7 | 28395018                                                                              | N-Term(iTRAQ4plex), K12(iTRAQ4plex) | 1738.03142 | 39 | 43 |  | 3.54 | Expt1 |
| LIQEILGR            | 8 | 111185907                                                                             | N-Term(iTRAQ4plex)                  | 1085.68083 | 39 | 43 |  | 2.97 | Expt1 |
| GAAMVTAVAYR         | 3 | 225735584;225735582;7305143                                                           | N-Term(iTRAQ4plex)                  | 1253.68279 | 39 | 49 |  | 3.08 | Expt1 |
| TLLEAENSR           | 8 | 50363232                                                                              | N-Term(iTRAQ4plex), N7(Deamidated)  | 1177.61797 | 39 | 43 |  | 2.91 | Expt1 |
| ALVEYSCR            | 4 | 33469047                                                                              | N-Term(iTRAQ4plex), C7(Methylthio)  | 1130.54460 | 39 | 31 |  | 2.87 | Expt1 |
| LLGELLK             | 2 | 33859640                                                                              | N-Term(iTRAQ4plex), K7(iTRAQ4plex)  | 1073.71013 | 39 | 32 |  |      | Expt1 |
| ISELTSELTDER        | 3 | 22094119                                                                              | N-Term(iTRAQ4plex)                  | 1536.79192 | 39 | 58 |  | 3.15 | Expt1 |
| ELNSYEDFLDAR        | 3 | 27370240                                                                              | N-Term(iTRAQ4plex)                  | 1615.77007 | 39 | 49 |  | 4.07 | Expt1 |
| YASNAVSESMIR        | 3 | 161016822;161016820                                                                   | N-Term(iTRAQ4plex)                  | 1471.73271 | 39 | 37 |  | 4.17 | Expt1 |
| QILVGDIGDTPYTSFVK   | 3 | 6671746                                                                               | N-Term(iTRAQ4plex), K20(iTRAQ4plex) | 2484.32096 | 39 | 69 |  | 4.06 | Expt1 |
| QQVTLQIGVVNEAPYTR   | 5 | 7305007                                                                               | N-Term(iTRAQ4plex)                  | 2060.12802 | 39 | 58 |  | 4.96 | Expt1 |
| DFTPAELR            | 2 | 31980806                                                                              | N-Term(iTRAQ4plex)                  | 1092.58037 | 39 |    |  | 2.86 | Expt1 |
| ITQLVSEQANQVLAR     | 3 | 157823695;157823731;157823795;157823761                                               | N-Term(iTRAQ4plex)                  | 1814.02860 | 39 | 63 |  | 4.59 | Expt1 |
| ALDFIASK            | 3 | 61097906;11230802;7304855                                                             | N-Term(iTRAQ4plex), K8(iTRAQ4plex)  | 1152.67937 | 39 | 48 |  | 3.48 | Expt1 |
| IFVWDWQR            | 1 | 149251616;9507079                                                                     | N-Term(iTRAQ4plex)                  | 1293.69084 | 39 |    |  |      | Expt1 |
| AMEIAEALGR          | 6 | 145699137;145864477;145699099;33186906;145864463;32526871;47059123;284413688          | N-Term(iTRAQ4plex)                  | 1204.65129 | 39 | 54 |  | 3.30 | Expt1 |
| EVPAPALPVVR         | 2 | 20070404                                                                              | N-Term(iTRAQ4plex)                  | 1291.78447 | 39 | 66 |  |      | Expt1 |
| DVQEIFR             | 1 | 9790069;38372907                                                                      | N-Term(iTRAQ4plex)                  | 1050.57280 | 39 |    |  |      | Expt1 |
| IIDTPQFQR           | 1 | 213418055;213418079                                                                   | N-Term(iTRAQ4plex)                  | 1261.70415 | 39 |    |  |      | Expt1 |
| APPEPGATR           | 1 | 83523744                                                                              | N-Term(iTRAQ4plex)                  | 1136.62200 | 39 |    |  |      | Expt1 |
| APPPQASPAR          | 1 | 111185930                                                                             | N-Term(iTRAQ4plex), Q5(Deamidated)  | 1136.62200 | 39 |    |  |      | Expt1 |
| MLLFTEVTR           | 4 | 116089273                                                                             | N-Term(iTRAQ4plex), M1(Oxidation)   | 1269.70183 | 39 | 46 |  |      | Expt1 |
| LTLQPVDNSTISLQMGTKN | 5 | 149251847;21312564                                                                    | N-Term(iTRAQ4plex), K19(iTRAQ4plex) | 2348.27909 | 39 | 73 |  | 4.12 | Expt1 |
| SPTDVALFTYEGNSNDIR  | 4 | 7304993;226423871;226423873                                                           | N-Term(iTRAQ4plex)                  | 2230.05620 | 39 | 51 |  | 4.69 | Expt1 |
| NFLVLDRAR           | 3 | 82932654                                                                              | N-Term(iTRAQ4plex), N1(Deamidated)  | 1248.70757 | 39 | 37 |  |      | Expt1 |
| ESYSGIIDYNLEEQDVR   | 5 | 145864475                                                                             | N-Term(iTRAQ4plex)                  | 2174.04473 | 39 | 77 |  | 4.77 | Expt1 |
| FFGLPQTGDLDQNTIETMR | 4 | 6678902                                                                               | N-Term(iTRAQ4plex)                  | 2327.15549 | 39 | 89 |  | 4.12 | Expt1 |
| LLVVTDPDR           | 4 | 149251929;82905443;51766344;149270876                                                 | N-Term(iTRAQ4plex)                  | 1056.65495 | 39 | 36 |  |      | Expt1 |
| LLVVTNPR            | 4 | 63514363                                                                              | N-Term(iTRAQ4plex), N6(Deamidated)  | 1056.65495 | 39 | 36 |  |      | Expt1 |
| AGTQLLAGLR          | 3 | 154240716                                                                             | N-Term(iTRAQ4plex)                  | 1143.69817 | 39 | 49 |  | 3.69 | Expt1 |
| LQAEGLSPR           | 7 | 113680352                                                                             | N-Term(iTRAQ4plex)                  | 1114.63396 | 39 | 49 |  | 3.09 | Expt1 |
| DFPNLAFIR           | 8 | 229608920                                                                             | N-Term(iTRAQ4plex)                  | 1236.68779 | 39 | 41 |  | 3.31 | Expt1 |
| ALLTPVAIAAGR        | 5 | 149258655;160298213                                                                   | N-Term(iTRAQ4plex)                  | 1296.81682 | 39 | 50 |  | 3.26 | Expt1 |
| YIQELWR             | 2 | 13385036;149233830;82896911;149255416;149262861;149266587;149267527;82984224;82999391 | N-Term(iTRAQ4plex)                  | 1151.63408 | 39 | 43 |  |      | Expt1 |

|                   |    |                                                                                                                        |                                                     |            |    |    |  |      |       |
|-------------------|----|------------------------------------------------------------------------------------------------------------------------|-----------------------------------------------------|------------|----|----|--|------|-------|
| IDIAGR            | 3  | 6671509;6752954;6671507;157823889;22122825;14192922;8392847;33563240;30425250                                          | N-Term(iTRAQ4plex)                                  | 788.47521  | 39 |    |  |      | Expt1 |
| MMNNYDCPLPEEETNPK | 8  | 9790161                                                                                                                | N-Term(iTRAQ4plex), C8(Methylthio), K18(iTRAQ4plex) | 2473.07671 | 39 | 92 |  | 4.27 | Expt1 |
| QLQALSSELAQAR     | 3  | 157277948                                                                                                              | N-Term(iTRAQ4plex)                                  | 1558.86980 | 39 | 61 |  | 4.03 | Expt1 |
| VVGNPFDSR         | 4  | 6753036                                                                                                                | N-Term(iTRAQ4plex)                                  | 1134.60344 | 39 | 35 |  | 3.16 | Expt1 |
| ADAEAAAATR        | 3  | 6753658                                                                                                                | N-Term(iTRAQ4plex)                                  | 1206.57488 | 39 | 33 |  | 3.26 | Expt1 |
| YFPYYGK           | 2  | 6680744                                                                                                                | N-Term(iTRAQ4plex), K7(iTRAQ4plex)                  | 1225.66081 | 39 | 40 |  |      | Expt1 |
| ALELEQLR          | 3  | 33413404                                                                                                               | N-Term(iTRAQ4plex)                                  | 1244.69792 | 39 | 42 |  | 2.90 | Expt1 |
| SLLDLENGR         | 5  | 112421039                                                                                                              | N-Term(iTRAQ4plex), N7(Deamidated)                  | 1161.62383 | 39 | 40 |  | 3.04 | Expt1 |
| TIPLISQCTPK       | 7  | 31982186                                                                                                               | N-Term(iTRAQ4plex), C9(Methylthio), K12(iTRAQ4plex) | 1647.94681 | 39 | 47 |  | 3.30 | Expt1 |
| DMDLWEQEEER       | 3  | 146219837                                                                                                              | N-Term(iTRAQ4plex)                                  | 1751.76897 | 39 | 49 |  | 3.96 | Expt1 |
| VMLETPEYR         | 3  | 225735647;21450053                                                                                                     | N-Term(iTRAQ4plex)                                  | 1281.66521 | 39 | 39 |  |      | Expt1 |
| LLLGAGAVAYGVR     | 6  | 126723336                                                                                                              | N-Term(iTRAQ4plex)                                  | 1403.85019 | 39 | 92 |  | 4.44 | Expt1 |
| GEELSCEER         | 18 | 134023662                                                                                                              | N-Term(iTRAQ4plex), C6(Methylthio)                  | 1241.52849 | 39 | 55 |  | 3.37 | Expt1 |
| WFWDFATR          | 1  | 160358829                                                                                                              | N-Term(iTRAQ4plex)                                  | 1272.63054 | 39 |    |  |      | Expt1 |
| ATIGLIR           | 2  | 28395018                                                                                                               | N-Term(iTRAQ4plex)                                  | 887.57878  | 39 |    |  |      | Expt1 |
| LLLLGTGESGK       | 3  | 6754004;160298199;84662745                                                                                             | N-Term(iTRAQ4plex), K11(iTRAQ4plex)                 | 1375.83965 | 39 | 86 |  | 3.36 | Expt1 |
| VTDSVSVQLR        | 5  | 124487435                                                                                                              | N-Term(iTRAQ4plex)                                  | 1334.73955 | 39 | 63 |  | 3.43 | Expt1 |
| VNLFDFVK          | 3  | 149261435                                                                                                              | N-Term(iTRAQ4plex), K9(iTRAQ4plex)                  | 1382.83403 | 39 | 62 |  | 3.29 | Expt1 |
| LSTIALALGVER      | 4  | 77539776;77539770;8394027                                                                                              | N-Term(iTRAQ4plex)                                  | 1386.84783 | 39 | 60 |  | 3.01 | Expt1 |
| IIELPFQNK         | 4  | 6678103                                                                                                                | N-Term(iTRAQ4plex), K9(iTRAQ4plex)                  | 1389.84831 | 39 | 55 |  | 3.13 | Expt1 |
| DSETEVEELR        | 5  | 194328702;194328706;18700026;194328708                                                                                 | N-Term(iTRAQ4plex)                                  | 1350.65068 | 39 | 55 |  | 4.17 | Expt1 |
| IAEFAFEYAR        | 5  | 18250284                                                                                                               | N-Term(iTRAQ4plex)                                  | 1360.70525 | 39 | 51 |  | 3.65 | Expt1 |
| FEPQINAESEIR      | 4  | 6680139;46909579                                                                                                       | N-Term(iTRAQ4plex)                                  | 1705.85161 | 39 | 47 |  | 3.22 | Expt1 |
| VVLVTGAGGGLGR     | 3  | 31982273                                                                                                               | N-Term(iTRAQ4plex)                                  | 1299.78703 | 39 | 42 |  | 3.20 | Expt1 |
| TFEVCDLPVR        | 5  | 29789080                                                                                                               | N-Term(iTRAQ4plex), C5(Methylthio)                  | 1368.67766 | 39 | 41 |  | 2.96 | Expt1 |
| LVPALQNSITR       | 3  | 38084778;94405733                                                                                                      | N-Term(iTRAQ4plex)                                  | 1355.81072 | 39 | 40 |  |      | Expt1 |
| AEVAAEFLNDR       | 1  | 162135936;162287057                                                                                                    | N-Term(iTRAQ4plex)                                  | 1378.71184 | 39 |    |  |      | Expt1 |
| MPLIGLGTWK        | 1  | 149252910;10946870                                                                                                     | N-Term(iTRAQ4plex), K10(iTRAQ4plex)                 | 1403.83647 | 39 |    |  |      | Expt1 |
| DLVGAMKR          | 1  | 169808409                                                                                                              | N-Term(iTRAQ4plex), M6(Oxidation), K7(iTRAQ4plex)   | 1264.71794 | 39 |    |  |      | Expt1 |
| AMSLVSGEGEGEQNEIR | 3  | 61102728                                                                                                               | N-Term(iTRAQ4plex)                                  | 1949.93315 | 39 | 46 |  | 4.41 | Expt1 |
| EDIQSVMTEVR       | 3  | 15426055                                                                                                               | N-Term(iTRAQ4plex)                                  | 1450.73467 | 39 | 37 |  | 3.39 | Expt1 |
| AIMNLDVEQYR       | 3  | 224922803                                                                                                              | N-Term(iTRAQ4plex)                                  | 1495.77153 | 39 | 41 |  | 3.52 | Expt1 |
| VQLLCPGGAAPR      | 1  | 238550155                                                                                                              | N-Term(iTRAQ4plex), Q2(Deamidated), C5(Methylthio)  | 1372.72856 | 39 |    |  |      | Expt1 |
| VVDDTACPLLR       | 3  | 22779895                                                                                                               | N-Term(iTRAQ4plex), C7(Methylthio)                  | 1391.71697 | 39 | 40 |  | 3.06 | Expt1 |
| LVVADTR           | 1  | 149273657;6755923;6678483                                                                                              | N-Term(iTRAQ4plex)                                  | 917.55644  | 39 |    |  |      | Expt1 |
| YLDLGAYYSAR       | 3  | 58037109                                                                                                               | N-Term(iTRAQ4plex)                                  | 1435.73577 | 39 | 41 |  | 2.84 | Expt1 |
| TLDLPIYVTR        | 1  | 226823359                                                                                                              | N-Term(iTRAQ4plex)                                  | 1334.78374 | 39 |    |  |      | Expt1 |
| VVLAPQDVVVAR      | 3  | 30425042                                                                                                               | N-Term(iTRAQ4plex)                                  | 1409.86064 | 39 | 32 |  | 2.92 | Expt1 |
| VSADPEFAR         | 2  | 6671688                                                                                                                | N-Term(iTRAQ4plex)                                  | 1135.58867 | 39 |    |  | 2.96 | Expt1 |
| VAFSVAR           | 4  | 149252852;149255712;149255714;149255716;94404874;149270989;149270991;149270993;149271090;149271092;149271094;149274463 | N-Term(iTRAQ4plex)                                  | 893.53528  | 39 | 39 |  |      | Expt1 |
| SFDDSGSGYCR       | 3  | 93102409                                                                                                               | N-Term(iTRAQ4plex), C10(Methylthio)                 | 1383.54338 | 39 | 58 |  | 3.07 | Expt1 |
| ANLSLLR           | 2  | 149252953;23956214                                                                                                     | N-Term(iTRAQ4plex)                                  | 930.58562  | 39 | 32 |  |      | Expt1 |
| IIIEDLLEATR       | 3  | 149254348;112807186                                                                                                    | N-Term(iTRAQ4plex)                                  | 1429.84551 | 39 | 53 |  | 3.20 | Expt1 |
| LIIEYAYTR         | 2  | 13385188                                                                                                               | N-Term(iTRAQ4plex), Y7(iTRAQ4plex)                  | 1429.84551 | 39 |    |  |      | Expt1 |
| DLEEWNQR          | 4  | 30794164                                                                                                               | N-Term(iTRAQ4plex)                                  | 1233.59819 | 38 | 38 |  | 3.03 | Expt1 |
| NLICAFITDR        | 3  | 149263881;6677759;134949013                                                                                            | N-Term(iTRAQ4plex), C4(Methylthio)                  | 1355.69597 | 38 | 40 |  | 3.56 | Expt1 |
| LLPLEEYYR         | 3  | 215983062                                                                                                              | N-Term(iTRAQ4plex)                                  | 1339.73967 | 38 | 53 |  | 3.03 | Expt1 |

|                                       |    |                                                                     |                                                                     |            |    |    |      |       |
|---------------------------------------|----|---------------------------------------------------------------------|---------------------------------------------------------------------|------------|----|----|------|-------|
| SEIDLLDIR                             | 12 | 149254235;149265356;149265358;160707925;160707921                   | N-Term(iTRAQ4plex)                                                  | 1217.68608 | 38 | 40 | 3.18 | Expt1 |
| GAQPQILEAIPK                          | 2  | 27734136                                                            | N-Term(iTRAQ4plex), K12(iTRAQ4plex)                                 | 1552.93816 | 38 |    | 3.79 | Expt1 |
| MTNGFSGADLTEICQR                      | 5  | 225543319;94408011                                                  | N-Term(iTRAQ4plex), M1(Oxidation), N3(Deamidated), C14(Methylthio)  | 1949.85613 | 38 | 69 | 4.28 | Expt1 |
| DASVVGFFR                             | 3  | 112293264                                                           | N-Term(iTRAQ4plex)                                                  | 1141.61553 | 38 |    | 3.29 | Expt1 |
| YIETDPANR                             | 4  | 28916693                                                            | N-Term(iTRAQ4plex)                                                  | 1222.61772 | 38 | 44 | 3.17 | Expt1 |
| GLPQIAR                               | 7  | 9790161                                                             | N-Term(iTRAQ4plex)                                                  | 898.55785  | 38 | 33 |      | Expt1 |
| MEDGEFWSFR                            | 5  | 160333229                                                           | N-Term(iTRAQ4plex)                                                  | 1578.68950 | 38 | 44 | 3.29 | Expt1 |
| ELDQWVEQLNECK                         | 3  | 8394024                                                             | N-Term(iTRAQ4plex), C12(Methylthio), K13(iTRAQ4plex)                | 1967.94577 | 38 | 48 | 3.62 | Expt1 |
| TGYTLDVTTGQR                          | 5  | 33859724;114145493;29788787                                         | N-Term(iTRAQ4plex)                                                  | 1455.75871 | 38 | 76 | 3.89 | Expt1 |
| QELAERAR                              | 2  | 167900427                                                           | N-Term(iTRAQ4plex)                                                  | 1116.61296 | 38 | 38 |      | Expt1 |
| MLQEDELRL                             | 3  | 6680722;149254976                                                   | N-Term(iTRAQ4plex)                                                  | 1177.60185 | 38 | 37 | 3.17 | Expt1 |
| GSLVPPGALGGSALGGAPAGVR                | 6  | 31542089                                                            | N-Term(iTRAQ4plex)                                                  | 2199.24350 | 38 | 50 | 4.32 | Expt1 |
| ALQLEER                               | 14 | 149266483                                                           | N-Term(iTRAQ4plex)                                                  | 1131.61614 | 38 | 45 | 3.24 | Expt1 |
| VELSQLR                               | 1  | 149245216;149269684                                                 | N-Term(iTRAQ4plex)                                                  | 988.59087  | 38 |    |      | Expt1 |
| LVSDGNINSDR                           | 5  | 117938332;117938334                                                 | N-Term(iTRAQ4plex)                                                  | 1333.68474 | 38 | 45 | 3.31 | Expt1 |
| CTPACVSFGPK                           | 3  | 112293266                                                           | N-Term(iTRAQ4plex), C1(Methylthio), C5(Methylthio), K11(iTRAQ4plex) | 1489.68694 | 38 | 62 | 3.58 | Expt1 |
| AATADLEQYDR                           | 3  | 153792449;194440700                                                 | N-Term(iTRAQ4plex)                                                  | 1396.68486 | 38 | 44 | 3.36 | Expt1 |
| LSELQLR                               | 1  | 145966911                                                           | N-Term(iTRAQ4plex)                                                  | 1002.60704 | 38 |    |      | Expt1 |
| GVTLGFR                               | 4  | 149249426;51767763;149264373                                        | N-Term(iTRAQ4plex)                                                  | 893.53264  | 38 |    | 2.90 | Expt1 |
| LVFSALGPTSLK                          | 3  | 110735428;110735426                                                 | N-Term(iTRAQ4plex), K12(iTRAQ4plex)                                 | 1520.93657 | 38 | 78 | 3.87 | Expt1 |
| TFESLVDFCK                            | 11 | 111038118                                                           | N-Term(iTRAQ4plex), C9(Methylthio), K10(iTRAQ4plex)                 | 1522.76128 | 38 | 77 | 3.85 | Expt1 |
| SDVLVEYQGEGR                          | 2  | 29789239                                                            | N-Term(iTRAQ4plex)                                                  | 1495.75090 | 38 | 67 |      | Expt1 |
| SAMTSGVQSVMGSR                        | 5  | 13385312                                                            | N-Term(iTRAQ4plex)                                                  | 1541.75371 | 38 | 66 | 3.54 | Expt1 |
| LTLIDPETLLPR                          | 4  | 189409138                                                           | N-Term(iTRAQ4plex)                                                  | 1524.91570 | 38 | 65 | 3.44 | Expt1 |
| TVLLADQMISR                           | 4  | 31542425;20544147;20544149                                          | N-Term(iTRAQ4plex)                                                  | 1503.87480 | 38 | 49 | 3.00 | Expt1 |
| IASGLGLAWIIGR                         | 3  | 13385010                                                            | N-Term(iTRAQ4plex)                                                  | 1470.89433 | 38 | 46 | 2.94 | Expt1 |
| ILTGDWFQEAR                           | 2  | 158937304                                                           | N-Term(iTRAQ4plex)                                                  | 1479.77507 | 38 | 35 |      | Expt1 |
| FGIEAFSDCLR                           | 3  | 170014720                                                           | N-Term(iTRAQ4plex), C9(Methylthio)                                  | 1447.68840 | 38 | 33 | 3.17 | Expt1 |
| SFFLQGER                              | 1  | 239052674                                                           | N-Term(iTRAQ4plex)                                                  | 1224.65007 | 38 |    |      | Expt1 |
| ADMVETQLMR                            | 1  | 55742711                                                            | N-Term(iTRAQ4plex)                                                  | 1465.72478 | 38 |    |      | Expt1 |
| IQLVAVNYIPEVR                         | 7  | 13385798                                                            | N-Term(iTRAQ4plex)                                                  | 1657.97696 | 38 | 72 | 3.85 | Expt1 |
| DAEDAMDAMDGAVLDGR                     | 11 | 6755478                                                             | N-Term(iTRAQ4plex), M6(Oxidation), M9(Oxidation)                    | 1927.81426 | 38 | 86 | 4.20 | Expt1 |
| IYTSIGEDYDER                          | 5  | 6679299                                                             | N-Term(iTRAQ4plex)                                                  | 1604.75823 | 38 | 50 | 3.53 | Expt1 |
| GVLIPEVYPDIIR                         | 7  | 37718993                                                            | N-Term(iTRAQ4plex)                                                  | 1627.95622 | 38 | 53 | 3.30 | Expt1 |
| ALLQELQR                              | 3  | 227330621                                                           | N-Term(iTRAQ4plex), Q4(Deamidated), Q7(Deamidated)                  | 1116.63762 | 38 |    | 3.04 | Expt1 |
| VAPAPAVVK                             | 3  | 149250878;149257810;149258982;149259749;149260113;94386298;82930638 | N-Term(iTRAQ4plex), K9(iTRAQ4plex)                                  | 1139.74956 | 38 | 52 | 3.32 | Expt1 |
| DPQLVPILIDAAR                         | 9  | 31982437                                                            | N-Term(iTRAQ4plex)                                                  | 1564.92241 | 38 | 48 | 3.38 | Expt1 |
| LTFIFGFIGSLR                          | 5  | 54607112;54607114                                                   | N-Term(iTRAQ4plex)                                                  | 1464.87370 | 38 | 39 | 3.67 | Expt1 |
| GIPGPEGPPGDPGLTECDVMTYVR              | 5  | 22203747                                                            | N-Term(iTRAQ4plex), C20(Methylthio)                                 | 2930.35288 | 38 | 40 | 3.95 | Expt1 |
| FGTLFTMDR                             | 10 | 6678321                                                             | N-Term(iTRAQ4plex), M7(Oxidation)                                   | 1247.62102 | 38 | 42 | 2.96 | Expt1 |
| LLLLER                                | 16 | 124249066;170671710;111185907;61098129                              | N-Term(iTRAQ4plex)                                                  | 900.60179  | 38 | 29 |      | Expt1 |
| LLLLQR                                | 16 | 94158950;111120342                                                  | N-Term(iTRAQ4plex), Q5(Deamidated)                                  | 900.60179  | 38 | 29 |      | Expt1 |
| LPEGQLPEAELPAAQAAAGALK                | 3  | 149263538                                                           | N-Term(iTRAQ4plex), K23(iTRAQ4plex)                                 | 2490.39145 | 38 | 52 | 3.74 | Expt1 |
| ASPATQPPLLPSTPGPDATVVGSAPTPLPPSATAAVK | 1  | 110626031                                                           | N-Term(iTRAQ4plex), K40(iTRAQ4plex)                                 | 4057.25942 | 38 |    |      | Expt1 |
| SEGTYCCGPVSVR                         | 5  | 6678329                                                             | N-Term(iTRAQ4plex), C6(Methylthio), C7(Methylthio)                  | 1593.66582 | 38 | 74 | 4.10 | Expt1 |
| IPVTLDTIPVFQR                         | 2  | 124487339                                                           | N-Term(iTRAQ4plex)                                                  | 1642.97014 | 38 | 54 |      | Expt1 |
| IGPITPLQFYK                           | 3  | 30519997                                                            | N-Term(iTRAQ4plex), K11(iTRAQ4plex)                                 | 1564.93962 | 38 | 52 | 3.09 | Expt1 |
| AYVVLGGQLVLK                          | 3  | 94408064;6753178                                                    | N-Term(iTRAQ4plex), K12(iTRAQ4plex)                                 | 1638.03806 | 38 | 49 | 3.33 | Expt1 |
| VLETTVEIFNK                           | 3  | 13928670                                                            | N-Term(iTRAQ4plex), K11(iTRAQ4plex)                                 | 1580.91922 | 38 | 39 | 3.12 | Expt1 |

|                             |    |                                                                                   |                                                                     |            |    |    |  |      |       |
|-----------------------------|----|-----------------------------------------------------------------------------------|---------------------------------------------------------------------|------------|----|----|--|------|-------|
| ENVEGPQCQLCR                | 2  | 226423935                                                                         | N-Term(iTRAQ4plex), C8(Methylthio), C11(Methylthio)                 | 1611.68633 | 38 | 36 |  |      | Expt1 |
| NLLSVAYK                    | 26 | 226874906;31543976;149263879;149269348;134023662;6756037;6756041;6756039;31543974 | N-Term(iTRAQ4plex), K8(iTRAQ4plex)                                  | 1195.73772 | 38 | 63 |  | 3.71 | Expt1 |
| DYFEEYGK                    | 3  | 149274531;32880197;109134362                                                      | N-Term(iTRAQ4plex), K8(iTRAQ4plex)                                  | 1338.64873 | 37 | 53 |  | 3.55 | Expt1 |
| DYFEQYGK                    | 3  | 6754220;85060507;260304980                                                        | N-Term(iTRAQ4plex), Q5(Deamidated), K8(iTRAQ4plex)                  | 1338.64873 | 37 | 53 |  | 3.55 | Expt1 |
| GLQDVLRL                    | 1  | 6753324                                                                           | N-Term(iTRAQ4plex)                                                  | 944.56383  | 37 |    |  |      | Expt1 |
| APVVLQPEQIVSEETPPPLTK       | 2  | 194394197;146231985                                                               | N-Term(iTRAQ4plex), K23(iTRAQ4plex)                                 | 2802.58591 | 37 |    |  | 3.85 | Expt1 |
| GILLFGPPGTGK                | 3  | 164698506;31560300;18699726                                                       | N-Term(iTRAQ4plex), K12(iTRAQ4plex)                                 | 1444.88616 | 37 | 51 |  | 3.58 | Expt1 |
| GQTLVVQFTVK                 | 3  | 6680836                                                                           | N-Term(iTRAQ4plex), K11(iTRAQ4plex)                                 | 1507.91887 | 37 | 74 |  | 3.55 | Expt1 |
| DIVINANPAPSLLLVLHR          | 3  | 22122695;288541337                                                                | N-Term(iTRAQ4plex)                                                  | 2283.33597 | 37 | 29 |  | 3.46 | Expt1 |
| ALLYLCGGDD                  | 1  | 6996913                                                                           | N-Term(iTRAQ4plex), Y4(iTRAQ4plex), C6(Methylthio)                  | 1373.67339 | 37 |    |  |      | Expt1 |
| MEEADALIESLCR               | 6  | 74315975                                                                          | N-Term(iTRAQ4plex), M1(Oxidation), C12(Methylthio)                  | 1685.77007 | 37 | 78 |  | 3.59 | Expt1 |
| IIDAALR                     | 6  | 112181182                                                                         | N-Term(iTRAQ4plex)                                                  | 915.57506  | 37 | 38 |  | 2.91 | Expt1 |
| IPVDTYNNILTVLK              | 7  | 13928670                                                                          | N-Term(iTRAQ4plex), K14(iTRAQ4plex)                                 | 1891.11362 | 37 | 56 |  | 3.93 | Expt1 |
| MIYEMFSGDFTR                | 3  | 114145467                                                                         | N-Term(iTRAQ4plex)                                                  | 1640.75969 | 37 | 44 |  | 3.56 | Expt1 |
| YLMGER                      | 1  | 6754524                                                                           | N-Term(iTRAQ4plex)                                                  | 912.47301  | 37 |    |  |      | Expt1 |
| FQVTVPGAK                   | 3  | 61743961                                                                          | N-Term(iTRAQ4plex), K9(iTRAQ4plex)                                  | 1234.74797 | 37 | 64 |  | 3.14 | Expt1 |
| MIYEAELSQMQNVSDTSVVLMSMDNRR | 2  | 29789317                                                                          | N-Term(iTRAQ4plex), M10(Oxidation), M23(Oxidation)                  | 3278.49599 | 37 |    |  | 3.21 | Expt1 |
| FSPMPGFK                    | 3  | 61743961                                                                          | N-Term(iTRAQ4plex), K7(iTRAQ4plex)                                  | 1101.60991 | 37 | 36 |  |      | Expt1 |
| GVVQDLQQAISK                | 5  | 56699438;54287684                                                                 | N-Term(iTRAQ4plex), K12(iTRAQ4plex)                                 | 1573.92131 | 37 | 79 |  | 5.08 | Expt1 |
| LGLVGNLSLDGVK               | 10 | 29293809                                                                          | N-Term(iTRAQ4plex), K14(iTRAQ4plex)                                 | 1672.03118 | 37 | 89 |  | 4.31 | Expt1 |
| CDPIDFSNSPEALR              | 6  | 9507145;85702351                                                                  | N-Term(iTRAQ4plex), C1(Methylthio)                                  | 1753.80364 | 37 | 65 |  | 3.37 | Expt1 |
| CDPIDQCQDSETR               | 7  | 46849812                                                                          | N-Term(iTRAQ4plex), C1(Methylthio), C7(Methylthio)                  | 1745.67021 | 37 | 62 |  | 3.30 | Expt1 |
| CECFPGLAVGLDGR              | 13 | 118197277                                                                         | N-Term(iTRAQ4plex), C1(Methylthio), C3(Methylthio)                  | 1672.74663 | 37 | 61 |  | 3.52 | Expt1 |
| DITLECISSGEP                | 8  | 149253040;183979966                                                               | N-Term(iTRAQ4plex), C6(Methylthio)                                  | 1609.76995 | 37 | 58 |  | 3.49 | Expt1 |
| ENDYYTPTGEFR                | 5  | 148747128                                                                         | N-Term(iTRAQ4plex)                                                  | 1635.74089 | 37 | 40 |  | 3.48 | Expt1 |
| GCSSQCEDDSENYLGGK           | 3  | 21312316                                                                          | N-Term(iTRAQ4plex), C2(Methylthio), C6(Methylthio), K17(iTRAQ4plex) | 2277.90305 | 37 | 65 |  | 4.14 | Expt1 |
| GEAGPQGAR                   | 5  | 34328108                                                                          | N-Term(iTRAQ4plex)                                                  | 986.51256  | 37 | 39 |  |      | Expt1 |
| GDLYFANVEENDSR              | 5  | 110347545                                                                         | N-Term(iTRAQ4plex)                                                  | 1772.82195 | 37 | 73 |  | 3.53 | Expt1 |
| LLLVGAPR                    | 7  | 31982236                                                                          | N-Term(iTRAQ4plex)                                                  | 982.65453  | 37 | 43 |  |      | Expt1 |
| LILFPR                      | 4  | 149251177;149252074;94397192;149266965;238776830                                  | N-Term(iTRAQ4plex)                                                  | 902.59642  | 37 |    |  |      | Expt1 |
| FYEQMNGPVTSGSR              | 7  | 56699438;54287684                                                                 | N-Term(iTRAQ4plex), N6(Deamidated)                                  | 1717.79863 | 37 | 66 |  | 4.23 | Expt1 |
| LTESPCALVASQYWGSGNMR        | 4  | 6755863                                                                           | N-Term(iTRAQ4plex), C6(Methylthio), M19(Oxidation)                  | 2505.14078 | 37 | 60 |  | 4.45 | Expt1 |
| DCDLQEDACYNCGR              | 3  | 157909784                                                                         | N-Term(iTRAQ4plex), C2(Methylthio), C9(Methylthio), C12(Methylthio) | 1886.64250 | 37 | 89 |  | 3.94 | Expt1 |
| CECPVGFYNDK                 | 4  | 118197277                                                                         | N-Term(iTRAQ4plex), C1(Methylthio), C3(Methylthio), K12(iTRAQ4plex) | 1801.76543 | 37 | 76 |  | 3.94 | Expt1 |
| AEDVEPECIMEK                | 5  | 7304993;226423871;226423873                                                       | N-Term(iTRAQ4plex), C9(Methylthio), K13(iTRAQ4plex)                 | 1855.83757 | 37 | 72 |  | 3.88 | Expt1 |
| IPEPLNVLIPVLDRL             | 3  | 12963591                                                                          | N-Term(iTRAQ4plex)                                                  | 1805.10832 | 37 | 66 |  | 3.90 | Expt1 |
| IPAFLNVDIAGLVK              | 5  | 21313144;76677915                                                                 | N-Term(iTRAQ4plex), K15(iTRAQ4plex)                                 | 1857.14983 | 37 | 60 |  | 4.12 | Expt1 |
| NIAFFSTNCVEGTAR             | 6  | 21450277                                                                          | N-Term(iTRAQ4plex), C9(Methylthio)                                  | 1819.86455 | 37 | 54 |  | 3.08 | Expt1 |
| AIDMCPNNASYYGNR             | 2  | 31980994                                                                          | N-Term(iTRAQ4plex), C5(Methylthio)                                  | 1878.80351 | 37 | 33 |  |      | Expt1 |
| GTCWQTVIDGR                 | 8  | 118197277                                                                         | N-Term(iTRAQ4plex), C3(Methylthio)                                  | 1425.67583 | 36 | 71 |  | 3.60 | Expt1 |
| LFDFTER                     | 2  | 110626070                                                                         | N-Term(iTRAQ4plex)                                                  | 1071.55974 | 36 |    |  |      | Expt1 |
| VLLTTQGVDMISK               | 3  | 134288917                                                                         | N-Term(iTRAQ4plex), K13(iTRAQ4plex)                                 | 1692.98967 | 36 | 89 |  | 3.82 | Expt1 |
| TEITDLR                     | 3  | 226823220                                                                         | N-Term(iTRAQ4plex)                                                  | 991.55498  | 36 |    |  | 2.89 | Expt1 |
| GDIASQNMRR                  | 13 | 111074529                                                                         | N-Term(iTRAQ4plex), M9(Oxidation)                                   | 1282.60234 | 36 | 34 |  | 2.99 | Expt1 |
| ELGDCCNFGPALGEVGEAMR        | 8  | 31560792                                                                          | N-Term(iTRAQ4plex), C6(Methylthio)                                  | 2270.00322 | 36 | 78 |  | 4.89 | Expt1 |
| AVTIFIR                     | 5  | 6671702                                                                           | N-Term(iTRAQ4plex)                                                  | 963.61125  | 36 | 37 |  |      | Expt1 |
| SPDTNYLFMGDYVDR             | 6  | 8394024;149258657;9506983                                                         | N-Term(iTRAQ4plex), M9(Oxidation)                                   | 1952.88810 | 36 | 62 |  | 3.88 | Expt1 |

|                       |    |                                                                                                                                                                                                            |                                                                                         |            |    |     |  |      |       |
|-----------------------|----|------------------------------------------------------------------------------------------------------------------------------------------------------------------------------------------------------------|-----------------------------------------------------------------------------------------|------------|----|-----|--|------|-------|
| NINDAWVCTNDMFR        | 3  | 82995559                                                                                                                                                                                                   | N-Term(iTRAQ4plex), C8(Methylthio)                                                      | 1888.82329 | 36 | 58  |  | 3.83 | Expt1 |
| NINNAWVCTNDMFR        | 3  | 94402184                                                                                                                                                                                                   | N-Term(iTRAQ4plex), N4(Deamidated), C8(Methylthio)                                      | 1888.82329 | 36 | 58  |  | 3.83 | Expt1 |
| NLVVPIK               | 5  | 160707894                                                                                                                                                                                                  | N-Term(iTRAQ4plex), K7(iTRAQ4plex)                                                      | 1070.72685 | 36 | 35  |  | 2.91 | Expt1 |
| EYACTAVDMISR          | 3  | 224922803                                                                                                                                                                                                  | N-Term(iTRAQ4plex), C4(Methylthio)                                                      | 1548.69914 | 36 | 37  |  | 3.15 | Expt1 |
| VLGATLSPELIQK         | 7  | 68226731                                                                                                                                                                                                   | N-Term(iTRAQ4plex), K13(iTRAQ4plex)                                                     | 1657.01653 | 36 | 83  |  | 4.35 | Expt1 |
| WGTLTDCVVMR           | 5  | 82801284;94371439;14925208<br>9;82918363;82918359;8295474<br>3;149266199;82954739;149266<br>543;149266545;82956957;5176<br>9129;149266569;82957137;944<br>00765;149268214;149268216;3<br>7674277;157277969 | N-Term(iTRAQ4plex), C7(Methylthio), M10(Oxidation)                                      | 1486.69837 | 36 | 43  |  | 3.33 | Expt1 |
| NSYLEVLLK             | 3  | 149262992;58037267                                                                                                                                                                                         | N-Term(iTRAQ4plex), K9(iTRAQ4plex)                                                      | 1366.83037 | 36 | 46  |  | 3.81 | Expt1 |
| VQVECSR               | 2  | 111074529                                                                                                                                                                                                  | N-Term(iTRAQ4plex), C5(Methylthio)                                                      | 1010.48851 | 36 | 31  |  |      | Expt1 |
| VVLVYVLR              | 4  | 225690566                                                                                                                                                                                                  | N-Term(iTRAQ4plex)                                                                      | 1119.70403 | 36 | 35  |  | 2.83 | Expt1 |
| DVFLK                 | 4  | 20902547;70778976;22624653<br>1                                                                                                                                                                            | N-Term(iTRAQ4plex), K6(iTRAQ4plex)                                                      | 1022.64134 | 36 | 44  |  |      | Expt1 |
| IVVNLTR               | 8  | 24762230;149250304;9437241<br>4;149254145;94388628;149261<br>725;149270415                                                                                                                                 | N-Term(iTRAQ4plex)                                                                      | 1015.63896 | 36 | 41  |  |      | Expt1 |
| NADMSEMQQNSVECATQALEK | 10 | 82998589                                                                                                                                                                                                   | N-Term(iTRAQ4plex), M4(Oxidation), Q10(Deamidated),<br>C15(Methylthio), K22(iTRAQ4plex) | 2807.21555 | 36 | 87  |  | 4.43 | Expt1 |
| NADMSEMQQDSVECATQALEK | 6  | 213688406                                                                                                                                                                                                  | N-Term(iTRAQ4plex), M8(Oxidation), C15(Methylthio),<br>K22(iTRAQ4plex)                  | 2807.21354 | 36 | 87  |  | 4.02 | Expt1 |
| NADMSEMQQDAVDCATQAMEK | 3  | 18087731;281182473                                                                                                                                                                                         | N-Term(iTRAQ4plex), C15(Methylthio), M20(Oxidation),<br>K22(iTRAQ4plex)                 | 2781.14957 | 36 | 84  |  | 5.06 | Expt1 |
| IYISLLK               | 2  | 146219835;146219830;146219<br>849;146231979                                                                                                                                                                | N-Term(iTRAQ4plex), K7(iTRAQ4plex)                                                      | 1137.75896 | 36 | 50  |  |      | Expt1 |
| SEDYAFPTYADR          | 6  | 6753498                                                                                                                                                                                                    | N-Term(iTRAQ4plex)                                                                      | 1578.72112 | 36 | 64  |  | 3.49 | Expt1 |
| GAALITAVGVR           | 5  | 225735584;225735582                                                                                                                                                                                        | N-Term(iTRAQ4plex)                                                                      | 1171.73088 | 35 | 49  |  | 3.07 | Expt1 |
| QLIVGVNK              | 4  | 126032329;6681273                                                                                                                                                                                          | N-Term(iTRAQ4plex), K8(iTRAQ4plex)                                                      | 1158.75102 | 35 | 41  |  | 3.36 | Expt1 |
| GGAEQFMEETER          | 2  | 238814391                                                                                                                                                                                                  | N-Term(iTRAQ4plex), M7(Oxidation)                                                       | 1543.68291 | 35 | 38  |  |      | Expt1 |
| LMDDLDR               | 4  | 6755392                                                                                                                                                                                                    | N-Term(iTRAQ4plex), M2(Oxidation)                                                       | 1037.50476 | 35 | 39  |  |      | Expt1 |
| NPCYVDDNCPQTVANR      | 13 | 82997826;38084778;94405733;<br>83019564                                                                                                                                                                    | N-Term(iTRAQ4plex), C3(Methylthio), C9(Methylthio)                                      | 2159.87163 | 35 | 108 |  | 4.30 | Expt1 |
| LLYVLEADSAIAK         | 12 | 112421039                                                                                                                                                                                                  | N-Term(iTRAQ4plex), K13(iTRAQ4plex)                                                     | 1694.00517 | 35 | 98  |  | 3.56 | Expt1 |
| SMVNLMDR              | 6  | 160333229                                                                                                                                                                                                  | N-Term(iTRAQ4plex)                                                                      | 1109.55620 | 35 | 46  |  | 3.13 | Expt1 |
| LTLNNAK               | 3  | 6679166                                                                                                                                                                                                    | N-Term(iTRAQ4plex), K7(iTRAQ4plex)                                                      | 1060.70586 | 35 | 56  |  | 3.16 | Expt1 |
| LSGCEAMDSEALVR        | 5  | 37718991;268839831                                                                                                                                                                                         | N-Term(iTRAQ4plex), C4(Methylthio)                                                      | 1670.77056 | 35 | 54  |  | 4.01 | Expt1 |
| LSGCEAMDSQALVR        | 5  | 21704206                                                                                                                                                                                                   | N-Term(iTRAQ4plex), C4(Methylthio), Q10(Deamidated)                                     | 1670.77056 | 35 | 54  |  | 4.01 | Expt1 |
| ACDLLDAR              | 6  | 160415215                                                                                                                                                                                                  | N-Term(iTRAQ4plex), C2(Methylthio)                                                      | 1066.51531 | 35 | 43  |  | 3.29 | Expt1 |
| IGNCPFSQR             | 3  | 15617203                                                                                                                                                                                                   | N-Term(iTRAQ4plex), C4(Methylthio)                                                      | 1211.57744 | 35 | 31  |  | 2.86 | Expt1 |
| SPLVTVVR              | 8  | 158749615                                                                                                                                                                                                  | N-Term(iTRAQ4plex)                                                                      | 1127.72832 | 35 | 33  |  |      | Expt1 |
| SMGYDDLGYGMMSDYGTAR   | 4  | 146219835;146219830;146219<br>849;146231979                                                                                                                                                                | N-Term(iTRAQ4plex)                                                                      | 2291.94023 | 35 | 84  |  | 4.14 | Expt1 |
| EFQDYIEPEEGCQSPQR     | 5  | 225543181                                                                                                                                                                                                  | N-Term(iTRAQ4plex), C12(Methylthio)                                                     | 2301.99004 | 35 | 46  |  | 3.49 | Expt1 |
| LLDENIQPEAPPPVK       | 2  | 46877052;46877043                                                                                                                                                                                          | N-Term(iTRAQ4plex), K18(iTRAQ4plex)                                                     | 2271.32901 | 35 |     |  | 3.21 | Expt1 |
| IGPLGLSPK             | 3  | 149233723;83028352;9439024<br>3;149274176;160333553                                                                                                                                                        | N-Term(iTRAQ4plex), K9(iTRAQ4plex)                                                      | 1169.75884 | 35 | 50  |  | 2.82 | Expt1 |
| EQVIAALR              | 3  | 171906578                                                                                                                                                                                                  | N-Term(iTRAQ4plex)                                                                      | 1043.63371 | 35 | 37  |  | 2.90 | Expt1 |
| NLYIISVK              | 3  | 12584986;149255181;1492555<br>70;149269218                                                                                                                                                                 | N-Term(iTRAQ4plex), K8(iTRAQ4plex)                                                      | 1237.78630 | 35 | 55  |  | 3.04 | Expt1 |
| ECADLWPR              | 11 | 12584986                                                                                                                                                                                                   | N-Term(iTRAQ4plex), C2(Methylthio)                                                      | 1179.54436 | 35 | 40  |  | 3.15 | Expt1 |
| NMMAACDPR             | 6  | 33859488;31981939;7106439;2<br>2165384;21746161;149253488;<br>149253527;27754056;1296361<br>5                                                                                                              | N-Term(iTRAQ4plex), M3(Oxidation), C6(Methylthio)                                       | 1214.49199 | 35 | 28  |  |      | Expt1 |
| LGPLVEQGR             | 8  | 163644329                                                                                                                                                                                                  | N-Term(iTRAQ4plex)                                                                      | 1112.65471 | 34 | 44  |  | 3.16 | Expt1 |
| LGLLEALLK             | 3  | 125656163                                                                                                                                                                                                  | N-Term(iTRAQ4plex), K9(iTRAQ4plex)                                                      | 1257.83867 | 34 | 54  |  | 3.35 | Expt1 |

|                                         |    |                                                                                                                                                                                                    |                                                                                                       |            |    |    |  |      |       |
|-----------------------------------------|----|----------------------------------------------------------------------------------------------------------------------------------------------------------------------------------------------------|-------------------------------------------------------------------------------------------------------|------------|----|----|--|------|-------|
| GIPELVLK                                | 6  | 31982236                                                                                                                                                                                           | N-Term(iTRAQ4plex), K8(iTRAQ4plex)                                                                    | 1156.76421 | 34 | 40 |  | 3.05 | Expt1 |
| MTVNESEQLVSCSMDDTVR                     | 5  | 6755995                                                                                                                                                                                            | N-Term(iTRAQ4plex), C12(Methylthio)                                                                   | 2334.01689 | 34 | 73 |  | 4.20 | Expt1 |
| YEMTYSGGGGGGGGGGGTSTR                   | 5  | 82950147;82950149                                                                                                                                                                                  | N-Term(iTRAQ4plex)                                                                                    | 2022.86943 | 34 | 49 |  | 3.70 | Expt1 |
| IIPLR                                   | 5  | 94374527;149262576;149268077;94404874;149270989;149271090;84490431;45433562;50345976;56797739;85861166;115270960;46309585;7363447;85701744;144922636;6754040;87299637;134053943;116063570;27369922 | N-Term(iTRAQ4plex)                                                                                    | 755.52849  | 34 |    |  |      | Expt1 |
| GLLSIR                                  | 1  | 8392847                                                                                                                                                                                            | N-Term(iTRAQ4plex)                                                                                    | 802.52941  | 34 |    |  |      | Expt1 |
| SACGVCPCR                               | 6  | 149252605;149254156;82952419;149268895;149275043                                                                                                                                                   | N-Term(iTRAQ4plex), C3(Methylthio), C6(Methylthio)                                                    | 1085.44487 | 34 | 41 |  | 2.89 | Expt1 |
| TEGEEEEEEEEESPTDGGEYK                   | 4  | 145587104                                                                                                                                                                                          | N-Term(iTRAQ4plex), K20(iTRAQ4plex)                                                                   | 2561.07437 | 34 | 48 |  | 3.98 | Expt1 |
| CGTPEEPCR                               | 4  | 12963685                                                                                                                                                                                           | N-Term(iTRAQ4plex), C1(Methylthio), C8(Methylthio)                                                    | 1227.47441 | 34 | 23 |  |      | Expt1 |
| VPPVQVSLIK                              | 2  | 83715998                                                                                                                                                                                           | N-Term(iTRAQ4plex), K11(iTRAQ4plex)                                                                   | 1464.93573 | 33 | 42 |  |      | Expt1 |
| VLAGLIR                                 | 5  | 37704389                                                                                                                                                                                           | N-Term(iTRAQ4plex)                                                                                    | 885.59471  | 33 | 28 |  |      | Expt1 |
| VLQLLR                                  | 5  | 31981515;124486949                                                                                                                                                                                 | N-Term(iTRAQ4plex)                                                                                    | 885.59471  | 33 | 28 |  |      | Expt1 |
| ILIDIR                                  | 6  | 94397118;6755364                                                                                                                                                                                   | N-Term(iTRAQ4plex)                                                                                    | 886.58409  | 33 | 28 |  |      | Expt1 |
| GAVLPIR                                 | 1  | 21704144                                                                                                                                                                                           | N-Term(iTRAQ4plex)                                                                                    | 869.57164  | 33 |    |  |      | Expt1 |
| YTMGDAPDYDR                             | 2  | 28076911;6680121                                                                                                                                                                                   | N-Term(iTRAQ4plex), M3(Oxidation)                                                                     | 1463.62651 | 33 | 37 |  |      | Expt1 |
| DCGTCDPGYYNLQSGQGGER                    | 6  | 153791270                                                                                                                                                                                          | N-Term(iTRAQ4plex), C2(Methylthio), C5(Methylthio), C18(Methylthio)                                   | 2447.90093 | 33 | 55 |  | 3.42 | Expt1 |
| EGECCAFCPPEEYVSPNSDEVGVEGPK             | 43 | 34328108                                                                                                                                                                                           | N-Term(iTRAQ4plex), C4(Methylthio), C5(Methylthio), C8(Methylthio), K26(iTRAQ4plex)                   | 3200.29612 | 33 | 55 |  | 6.25 | Expt1 |
| DIFGDACDNCR                             | 2  | 6755781                                                                                                                                                                                            | N-Term(iTRAQ4plex), C7(Methylthio), C10(Methylthio)                                                   | 1464.54888 | 33 | 49 |  |      | Expt1 |
| TCVDVNECDLNPNCISGTCENTK                 | 3  | 118197277                                                                                                                                                                                          | N-Term(iTRAQ4plex), C2(Methylthio), C8(Methylthio), C15(Methylthio), C20(Methylthio), K24(iTRAQ4plex) | 3057.24826 | 33 | 45 |  | 3.16 | Expt1 |
| YTMGDAPDFDR                             | 3  | 6754084                                                                                                                                                                                            | N-Term(iTRAQ4plex), M3(Oxidation)                                                                     | 1447.63103 | 33 | 29 |  |      | Expt1 |
| APGIIPR                                 | 3  | 6680748                                                                                                                                                                                            | N-Term(iTRAQ4plex)                                                                                    | 867.55327  | 33 | 29 |  |      | Expt1 |
| CDVDIR                                  | 12 | 6671509;6752954;30425250                                                                                                                                                                           | N-Term(iTRAQ4plex), C1(Methylthio)                                                                    | 910.42395  | 32 | 37 |  |      | Expt1 |
| AFLPLLR                                 | 2  | 123173870                                                                                                                                                                                          | N-Term(iTRAQ4plex)                                                                                    | 973.63420  | 32 | 33 |  |      | Expt1 |
| LTEGCSFR                                | 2  | 13385958;149260404                                                                                                                                                                                 | N-Term(iTRAQ4plex), C5(Methylthio)                                                                    | 1102.51543 | 32 | 37 |  |      | Expt1 |
| YICGEAPDYDR                             | 1  | 6754086                                                                                                                                                                                            | N-Term(iTRAQ4plex), C3(Methylthio)                                                                    | 1491.63396 | 32 |    |  |      | Expt1 |
| TECDIQDVEFAR                            | 4  | 148747331                                                                                                                                                                                          | N-Term(iTRAQ4plex), C3(Methylthio)                                                                    | 1615.72356 | 32 | 53 |  | 2.91 | Expt1 |
| VFYLK                                   | 2  | 31543976;149251472;149263879;149269348;149275178;134023662;6756037;6756041;6756039;31543974                                                                                                        | N-Term(iTRAQ4plex), K5(iTRAQ4plex)                                                                    | 957.59484  | 32 | 29 |  |      | Expt1 |
| DCEAEVR                                 | 4  | 77539776;77539770;8394027                                                                                                                                                                          | N-Term(iTRAQ4plex), C2(Methylthio)                                                                    | 1011.43486 | 32 | 32 |  | 2.95 | Expt1 |
| NPVLVR                                  | 1  | 82880886;149261044;149270558;149270560;84662736                                                                                                                                                    | N-Term(iTRAQ4plex)                                                                                    | 841.54057  | 32 |    |  |      | Expt1 |
| LLVCEDIDECQNGPVCQR                      | 9  | 118197277                                                                                                                                                                                          | N-Term(iTRAQ4plex), C4(Methylthio), C10(Methylthio), N12(Deamidated), C16(Methylthio)                 | 2316.96183 | 31 | 59 |  | 4.27 | Expt1 |
| GFGDGYNGYGGGGPGGNYSGSYNDFGNYNQGPSNYGPMK | 3  | 32880197                                                                                                                                                                                           | N-Term(iTRAQ4plex), N7(Deamidated), K39(iTRAQ4plex)                                                   | 4303.82680 | 31 | 58 |  | 4.45 | Expt1 |
| CPNPTCENMNFWSR                          | 3  | 20982845                                                                                                                                                                                           | N-Term(iTRAQ4plex), C1(Methylthio), C6(Methylthio)                                                    | 1934.76103 | 31 | 58 |  | 3.04 | Expt1 |
| LELPPR                                  | 3  | 124487435                                                                                                                                                                                          | N-Term(iTRAQ4plex)                                                                                    | 868.53752  | 31 | 28 |  |      | Expt1 |
| MTDYDCEFENV                             | 1  | 9789943                                                                                                                                                                                            | N-Term(iTRAQ4plex), Y4(iTRAQ4plex), C6(Methylthio)                                                    | 1699.69206 | 31 |    |  |      | Expt1 |
| FMMMR                                   | 1  | 13386054                                                                                                                                                                                           | N-Term(iTRAQ4plex)                                                                                    | 859.41136  | 30 |    |  |      | Expt1 |
| LECVENCR                                | 3  | 149251923;149255459;149265832                                                                                                                                                                      | N-Term(iTRAQ4plex), C3(Methylthio), C8(Methylthio)                                                    | 1298.54753 | 30 | 30 |  | 2.86 | Expt1 |
| EGALCEENMR                              | 4  | 149253258;33859482                                                                                                                                                                                 | N-Term(iTRAQ4plex), C5(Methylthio), M9(Oxidation)                                                     | 1357.56560 | 30 | 29 |  |      | Expt1 |
| ILIDLTR                                 | 2  | 21703836                                                                                                                                                                                           | N-Term(iTRAQ4plex)                                                                                    | 987.63439  | 30 |    |  |      | Expt1 |
| ILLQSIR                                 | 2  | 6679931                                                                                                                                                                                            | N-Term(iTRAQ4plex), Q4(Deamidated)                                                                    | 987.63439  | 30 |    |  |      | Expt1 |
| LIISLR                                  | 2  | 6755214                                                                                                                                                                                            | N-Term(iTRAQ4plex)                                                                                    | 987.63439  | 30 |    |  |      | Expt1 |
| VVLIPYVLP                               | 1  | 21313520                                                                                                                                                                                           | N-Term(iTRAQ4plex)                                                                                    | 1312.84856 | 30 |    |  |      | Expt1 |

|                                      |    |                                                                                                                                         |                                                                                                     |            |    |     |  |      |       |
|--------------------------------------|----|-----------------------------------------------------------------------------------------------------------------------------------------|-----------------------------------------------------------------------------------------------------|------------|----|-----|--|------|-------|
| LVLRL                                | 10 | 149241341;149271766;149274544;165972319;227330584;148529020;170172577;117676374;84781795;28076887;114326546;46361984;118130979;24233564 | N-Term(iTRAQ4plex)                                                                                  | 757.54625  | 30 | 31  |  |      | Expt1 |
| LIVLANR                              | 7  | 170932554                                                                                                                               | N-Term(iTRAQ4plex), N6(Deamidated)                                                                  | 943.60466  | 30 |     |  |      | Expt1 |
| CLCPEGFSLSSTGR                       | 3  | 118197277                                                                                                                               | N-Term(iTRAQ4plex), C1(Methylthio), C3(Methylthio)                                                  | 1692.73540 | 30 | 59  |  | 3.48 | Expt1 |
| LVQLLVR                              | 6  | 6671684                                                                                                                                 | N-Term(iTRAQ4plex)                                                                                  | 984.67034  | 30 | 36  |  |      | Expt1 |
| LLLFLK                               | 2  | 13385296;31981160                                                                                                                       | N-Term(iTRAQ4plex), K6(iTRAQ4plex)                                                                  | 1034.71489 | 29 | 44  |  |      | Expt1 |
| GIPNVLR                              | 2  | 21539585                                                                                                                                | N-Term(iTRAQ4plex)                                                                                  | 912.57494  | 29 | 28  |  |      | Expt1 |
| GYMGECEGFR                           | 3  | 33413404                                                                                                                                | N-Term(iTRAQ4plex), C6(Methylthio)                                                                  | 1209.49846 | 29 | 29  |  | 3.22 | Expt1 |
| DLQDQR                               | 1  | 6677833                                                                                                                                 | N-Term(iTRAQ4plex), C5(Methylthio)                                                                  | 939.41332  | 29 |     |  |      | Expt1 |
| CCTLPEDQR                            | 3  | 163310765                                                                                                                               | N-Term(iTRAQ4plex), C1(Methylthio), C2(Methylthio)                                                  | 1300.52751 | 28 | 37  |  |      | Expt1 |
| FACFER                               | 1  | 149258501;19526818                                                                                                                      | N-Term(iTRAQ4plex), C3(Methylthio)                                                                  | 962.43505  | 28 |     |  |      | Expt1 |
| VTVPLVR                              | 1  | 213417799;213417812                                                                                                                     | N-Term(iTRAQ4plex)                                                                                  | 927.61431  | 28 |     |  |      | Expt1 |
| CCSGSLVER                            | 15 | 163310765                                                                                                                               | N-Term(iTRAQ4plex), C1(Methylthio), C2(Methylthio)                                                  | 1189.49651 | 28 | 39  |  | 3.24 | Expt1 |
| LILVQIPVVAR                          | 3  | 114145467                                                                                                                               | N-Term(iTRAQ4plex)                                                                                  | 1463.98577 | 27 | 47  |  | 2.90 | Expt1 |
| VLGLVLR                              | 7  | 7305509;6678053                                                                                                                         | N-Term(iTRAQ4plex)                                                                                  | 1026.71831 | 27 | 40  |  |      | Expt1 |
| GPSCQDCDTGYTR                        | 4  | 183979966                                                                                                                               | N-Term(iTRAQ4plex), C4(Methylthio), C7(Methylthio)                                                  | 1638.61333 | 27 | 55  |  | 3.30 | Expt1 |
| DCPQECDCPPNFPTAMYCDNR                | 9  | 10946680                                                                                                                                | N-Term(iTRAQ4plex), C2(Methylthio), C6(Methylthio), C8(Methylthio), M16(Oxidation), C18(Methylthio) | 2762.95053 | 27 | 37  |  | 3.35 | Expt1 |
| TCQDINECETTNECR                      | 5  | 149261823;164607147                                                                                                                     | N-Term(iTRAQ4plex), C2(Methylthio), C8(Methylthio), C14(Methylthio)                                 | 2040.73662 | 26 | 63  |  | 3.31 | Expt1 |
| CVCVPSNTMCR                          | 4  | 149261823;164607147                                                                                                                     | C1(Methylthio), N-Term(iTRAQ4plex), C3(Methylthio), M9(Oxidation), C10(Methylthio)                  | 1510.55901 | 26 | 22  |  |      | Expt1 |
| NCMDIDECQR                           | 3  | 118197277                                                                                                                               | N-Term(iTRAQ4plex), C2(Methylthio), C8(Methylthio)                                                  | 1462.53459 | 23 | 34  |  | 3.23 | Expt1 |
| DMCTYCR                              | 1  | 70909345                                                                                                                                | N-Term(iTRAQ4plex), C3(Methylthio), C6(Methylthio)                                                  | 1127.39433 | 18 |     |  |      | Expt1 |
| VDIDVPDVNIEGPEGK                     | 6  | 61743961                                                                                                                                | N-Term(iTRAQ4plex), K16(iTRAQ4plex)                                                                 | 1984.04717 |    | 125 |  | 3.82 | Expt1 |
| GSADPEEESVLYSNR                      | 2  | 13385500                                                                                                                                | N-Term(iTRAQ4plex)                                                                                  | 1796.84099 |    | 114 |  | 3.21 | Expt1 |
| VTLSFPSTLQTGTGLK                     | 9  | 68226731                                                                                                                                | N-Term(iTRAQ4plex), K17(iTRAQ4plex)                                                                 | 2039.16899 |    | 112 |  | 4.20 | Expt1 |
| VFSDEVQQAQLSTIR                      | 4  | 51093840                                                                                                                                | N-Term(iTRAQ4plex)                                                                                  | 1993.04839 |    | 111 |  | 4.56 | Expt1 |
| IITLTGPTNAIFK                        | 15 | 6754994                                                                                                                                 | N-Term(iTRAQ4plex), K13(iTRAQ4plex)                                                                 | 1677.02690 |    | 109 |  | 4.10 | Expt1 |
| TLTTVQGIADDYDK                       | 2  | 21312159;149256779;149257401;149257542;82918783;94384431;22165347                                                                       | N-Term(iTRAQ4plex), K14(iTRAQ4plex)                                                                 | 1827.95635 |    | 108 |  | 3.99 | Expt1 |
| VTAVNDIAEQLLK                        | 2  | 55926127                                                                                                                                | N-Term(iTRAQ4plex), K13(iTRAQ4plex)                                                                 | 1702.00896 |    | 108 |  | 4.65 | Expt1 |
| CTGGEVGATSALAPK                      | 7  | 94390243;160333553;82995066;82994754                                                                                                    | N-Term(iTRAQ4plex), C1(Methylthio), K15(iTRAQ4plex)                                                 | 1695.86370 |    | 105 |  | 3.82 | Expt1 |
| GGAGGMGIGMGIAGSSGGSLCIFSGNDGGLLSGSEK | 24 | 149262636;118130981                                                                                                                     | N-Term(iTRAQ4plex), M6(Oxidation), C22(Methylthio), K37(iTRAQ4plex)                                 | 3565.66843 |    | 105 |  | 4.51 | Expt1 |
| YADLTEDQLPSCESLK                     | 5  | 114326546                                                                                                                               | N-Term(iTRAQ4plex), C12(Methylthio), K16(iTRAQ4plex)                                                | 2146.03032 |    | 104 |  | 4.58 | Expt1 |
| IVLTNPVCTEVGEK                       | 8  | 149271434;149274434;6753738;7242148                                                                                                     | N-Term(iTRAQ4plex), C8(Methylthio), K14(iTRAQ4plex)                                                 | 1835.98882 |    | 103 |  | 3.84 | Expt1 |
| ISMPPVDLELK                          | 4  | 61743961                                                                                                                                | N-Term(iTRAQ4plex), K11(iTRAQ4plex)                                                                 | 1547.85954 |    | 103 |  | 4.23 | Expt1 |
| GGGGSGQDNGLEGLGSDGR                  | 2  | 67846113                                                                                                                                | N-Term(iTRAQ4plex)                                                                                  | 1833.84587 |    | 102 |  | 4.43 | Expt1 |
| SSLEGPTILDIEK                        | 2  | 164698474                                                                                                                               | N-Term(iTRAQ4plex), K13(iTRAQ4plex)                                                                 | 1689.95256 |    | 101 |  | 4.08 | Expt1 |
| LATELPDLFQTAK                        | 3  | 160333863                                                                                                                               | N-Term(iTRAQ4plex), K13(iTRAQ4plex)                                                                 | 1734.99516 |    | 101 |  | 3.04 | Expt1 |
| LQSLFESPDFSK                         | 6  | 117606335                                                                                                                               | N-Term(iTRAQ4plex), K12(iTRAQ4plex)                                                                 | 1685.90288 |    | 100 |  | 3.47 | Expt1 |
| NLATTVTEIEIK                         | 5  | 33859724                                                                                                                                | N-Term(iTRAQ4plex), K13(iTRAQ4plex)                                                                 | 1748.99736 |    | 100 |  | 3.44 | Expt1 |
| LDFTGNLIEDIGTFSK                     | 5  | 6679166                                                                                                                                 | N-Term(iTRAQ4plex), K18(iTRAQ4plex)                                                                 | 2302.17949 |    | 100 |  | 4.72 | Expt1 |
| AVNQTAVALQPPATVR                     | 4  | 225637487                                                                                                                               | N-Term(iTRAQ4plex)                                                                                  | 1723.96013 |    | 99  |  | 4.15 | Expt1 |
| GGAGGMGIGMGIAGSSGGSLCIFSGNDGGLLSGSEK | 2  | 149262636;118130981                                                                                                                     | N-Term(iTRAQ4plex), C22(Methylthio), K37(iTRAQ4plex)                                                | 3549.67527 |    | 99  |  | 4.61 | Expt1 |
| ILGVWDTEISLKG                        | 4  | 130502130                                                                                                                               | N-Term(iTRAQ4plex), K13(iTRAQ4plex)                                                                 | 1718.99773 |    | 98  |  | 2.96 | Expt1 |
| IVILDEADSMTSAQAALR                   | 2  | 21703948                                                                                                                                | N-Term(iTRAQ4plex)                                                                                  | 2119.13120 |    | 98  |  | 4.66 | Expt1 |
| NQEQLAAELAEFTAK                      | 6  | 157277948                                                                                                                               | N-Term(iTRAQ4plex), K15(iTRAQ4plex)                                                                 | 1951.03374 |    | 98  |  | 4.71 | Expt1 |
| LDPGSPQLQVLK                         | 2  | 93102409                                                                                                                                | N-Term(iTRAQ4plex), K13(iTRAQ4plex)                                                                 | 1711.99065 |    | 97  |  | 4.05 | Expt1 |
| EFGASECISPDQFSK                      | 4  | 31982511                                                                                                                                | N-Term(iTRAQ4plex), C7(Methylthio), K15(iTRAQ4plex)                                                 | 1978.91509 |    | 97  |  | 4.38 | Expt1 |



|                           |    |                                                           |                                                                      |            |    |      |       |
|---------------------------|----|-----------------------------------------------------------|----------------------------------------------------------------------|------------|----|------|-------|
| QFGASECISPDQFSK           | 4  | 82892669                                                  | N-Term(iTRAQ4plex), Q1(Deamidated), C7(Methylthio), K15(iTRAQ4plex)  | 1978.91509 | 97 | 4.38 | Expt1 |
| AIEQADLLQEEDESPR          | 2  | 6671559                                                   | N-Term(iTRAQ4plex)                                                   | 1986.97649 | 97 | 4.87 | Expt1 |
| EFADSLGVPFLETSAK          | 13 | 21313162                                                  | N-Term(iTRAQ4plex), K16(iTRAQ4plex)                                  | 1999.06902 | 97 | 4.36 | Expt1 |
| VNMSGVSSSNGVVDPR          | 4  | 42741690;149251440                                        | N-Term(iTRAQ4plex), N10(Deamidated)                                  | 1749.85613 | 95 | 2.96 | Expt1 |
| TLNDELEIIEGMK             | 2  | 51766670;183396771                                        | N-Term(iTRAQ4plex), K13(iTRAQ4plex)                                  | 1792.96550 | 94 | 3.84 | Expt1 |
| AEGSDVANAVLDGADCIMLSGETAK | 12 | 31981562                                                  | N-Term(iTRAQ4plex), C16(Methylthio), M18(Oxidation), K25(iTRAQ4plex) | 2787.31125 | 94 | 5.09 | Expt1 |
| LIDDMVAQVLK               | 1  | 225579033                                                 | N-Term(iTRAQ4plex), K11(iTRAQ4plex)                                  | 1532.90581 | 94 |      | Expt1 |
| AQVQSGLDVLTAKE            | 2  | 31543942                                                  | N-Term(iTRAQ4plex), K14(iTRAQ4plex)                                  | 1746.00640 | 94 | 4.07 | Expt1 |
| LIDDMVAQAMK               | 2  | 162417975                                                 | N-Term(iTRAQ4plex), K11(iTRAQ4plex)                                  | 1522.82695 | 94 | 3.55 | Expt1 |
| AANEAGYFNEEMAPIEVK        | 4  | 29126205                                                  | N-Term(iTRAQ4plex), K18(iTRAQ4plex)                                  | 2271.12651 | 94 | 4.22 | Expt1 |
| AQITNPSGASTECFVK          | 2  | 145966915                                                 | N-Term(iTRAQ4plex), C13(Methylthio), K16(iTRAQ4plex)                 | 1986.98113 | 94 | 4.39 | Expt1 |
| FAVYLPPQAESGK             | 6  | 149264832;63660228;13937355                               | N-Term(iTRAQ4plex), K13(iTRAQ4plex)                                  | 1694.93767 | 93 | 3.44 | Expt1 |
| QFASQANMVGWPWIQTK         | 2  | 11230802                                                  | N-Term(iTRAQ4plex), K16(iTRAQ4plex)                                  | 2094.10625 | 93 | 4.60 | Expt1 |
| WNLLQQQTTTTSPK            | 3  | 133778953                                                 | N-Term(iTRAQ4plex), K14(iTRAQ4plex)                                  | 1934.06658 | 93 | 3.98 | Expt1 |
| AISSYFVSTMSSSIK           | 6  | 41152517;283945572;283945575;283945579                    | N-Term(iTRAQ4plex), K15(iTRAQ4plex)                                  | 1896.00908 | 93 | 3.58 | Expt1 |
| GGGGGGGGGGPQFPAPR         | 2  | 6755252                                                   | N-Term(iTRAQ4plex)                                                   | 1583.78215 | 93 | 4.81 | Expt1 |
| GTGTDEDALIEILTR           | 9  | 149254235;160707925                                       | N-Term(iTRAQ4plex)                                                   | 1848.97356 | 92 | 3.47 | Expt1 |
| AVDNQYVATASPAR            | 2  | 12963555                                                  | N-Term(iTRAQ4plex)                                                   | 1705.90117 | 92 | 4.47 | Expt1 |
| TFGENYVQELLEK             | 2  | 84872182;16930823                                         | N-Term(iTRAQ4plex), K13(iTRAQ4plex)                                  | 1857.99333 | 92 | 4.24 | Expt1 |
| GDALDVYNGLSSQAQGFDFVK     | 3  | 130502130                                                 | N-Term(iTRAQ4plex), N8(Deamidated), K22(iTRAQ4plex)                  | 2607.29477 | 91 | 2.98 | Expt1 |
| GVAALTSDPAVQAVLDTASDVLDK  | 4  | 227116327                                                 | N-Term(iTRAQ4plex), K25(iTRAQ4plex)                                  | 2757.51944 | 90 | 5.14 | Expt1 |
| LSEEEILENQDLFLTSEATDYGR   | 6  | 114205428                                                 | N-Term(iTRAQ4plex)                                                   | 2816.37192 | 90 | 4.97 | Expt1 |
| GDPDEQVQVAVAR             | 2  | 170014682;170014686                                       | N-Term(iTRAQ4plex)                                                   | 1671.82292 | 90 | 3.52 | Expt1 |
| WLLAAGVEFEK               | 5  | 149259801;149260087;169808401;50263046;154350202;31981724 | N-Term(iTRAQ4plex), K13(iTRAQ4plex)                                  | 1750.96306 | 90 | 3.99 | Expt1 |
| ISMPDVDFNLK               | 3  | 61743961                                                  | N-Term(iTRAQ4plex), K11(iTRAQ4plex)                                  | 1566.84624 | 89 | 3.25 | Expt1 |
| AALSGANVLTLEIK            | 4  | 124494256                                                 | N-Term(iTRAQ4plex), K14(iTRAQ4plex)                                  | 1688.02886 | 89 | 4.05 | Expt1 |
| AYGPIEPTGNMVK             | 2  | 125347376                                                 | N-Term(iTRAQ4plex), K14(iTRAQ4plex)                                  | 1721.91631 | 89 | 4.36 | Expt1 |
| LLDLVQSCSNYK              | 2  | 82930015;149249829;149259613                              | N-Term(iTRAQ4plex), C9(Methylthio), K12(iTRAQ4plex)                  | 1757.92229 | 89 | 3.96 | Expt1 |
| DALVNAVVDPLSAYSSAVASVPR   | 2  | 149251811;46402179                                        | N-Term(iTRAQ4plex)                                                   | 2445.31711 | 88 | 3.75 | Expt1 |
| ELDTVTLEDIK               | 5  | 19705424                                                  | N-Term(iTRAQ4plex), K11(iTRAQ4plex)                                  | 1563.87749 | 88 | 3.82 | Expt1 |
| YGIVDYMIEQSGPPSK          | 6  | 86198316                                                  | N-Term(iTRAQ4plex), K16(iTRAQ4plex)                                  | 2072.06816 | 88 | 4.68 | Expt1 |
| IDINMSGFNETDDLK           | 4  | 21704120;262050551                                        | N-Term(iTRAQ4plex), K15(iTRAQ4plex)                                  | 1999.99150 | 88 | 3.99 | Expt1 |
| EIAEAYDVLSDPR             | 3  | 9055242                                                   | N-Term(iTRAQ4plex)                                                   | 1621.82378 | 88 | 3.99 | Expt1 |
| SLNSEMDNILANLR            | 2  | 33859811                                                  | N-Term(iTRAQ4plex)                                                   | 1733.90080 | 88 | 4.70 | Expt1 |
| NLSFNITDELK               | 4  | 84875537                                                  | N-Term(iTRAQ4plex), K12(iTRAQ4plex)                                  | 1710.92180 | 88 | 3.09 | Expt1 |
| LFTAESLIGLK               | 2  | 148747410                                                 | N-Term(iTRAQ4plex), K11(iTRAQ4plex)                                  | 1479.91289 | 87 | 3.70 | Expt1 |
| GGANEGSEDDMLVDWFK         | 2  | 168229165                                                 | N-Term(iTRAQ4plex), K17(iTRAQ4plex)                                  | 2158.00322 | 87 | 3.74 | Expt1 |
| IVFLEESSQKEK              | 2  | 6753960                                                   | N-Term(iTRAQ4plex), K12(iTRAQ4plex)                                  | 1724.93791 | 87 | 3.82 | Expt1 |
| AQALAIETEALER             | 4  | 239052674                                                 | N-Term(iTRAQ4plex)                                                   | 1687.90166 | 87 | 3.60 | Expt1 |
| NVLVIDIITGK               | 3  | 96975138                                                  | N-Term(iTRAQ4plex), K13(iTRAQ4plex)                                  | 1717.00469 | 87 | 3.40 | Expt1 |
| IQPGNPSFTLSLK             | 3  | 88853578                                                  | N-Term(iTRAQ4plex), K13(iTRAQ4plex)                                  | 1689.97795 | 87 | 3.55 | Expt1 |
| LYSEDELPAEFK              | 2  | 225543576                                                 | N-Term(iTRAQ4plex), K12(iTRAQ4plex)                                  | 1728.89678 | 87 | 3.72 | Expt1 |
| SAAESISESVPVGPK           | 2  | 7305619                                                   | N-Term(iTRAQ4plex), K15(iTRAQ4plex)                                  | 1745.95195 | 87 | 4.03 | Expt1 |
| IQQEIAVQNPLVSR            | 4  | 149270309                                                 | N-Term(iTRAQ4plex)                                                   | 1868.03874 | 86 | 4.28 | Expt1 |
| NFINNPLAQADWAAK           | 3  | 114326446                                                 | N-Term(iTRAQ4plex), K15(iTRAQ4plex)                                  | 1961.05498 | 86 | 4.39 | Expt1 |
| AWTNPETLTESQVQVFLPR       | 4  | 15826848                                                  | N-Term(iTRAQ4plex)                                                   | 2360.24448 | 86 | 4.10 | Expt1 |
| YTLNVLEDLGGQK             | 3  | 21704120;262050551                                        | N-Term(iTRAQ4plex), K14(iTRAQ4plex)                                  | 1867.01225 | 85 | 4.58 | Expt1 |
| AIAGIINQPYNYQAGPDAALGR    | 2  | 39652626                                                  | N-Term(iTRAQ4plex)                                                   | 2580.33817 | 85 | 4.19 | Expt1 |
| SEIIPMFSNLASDEQDSVR       | 6  | 8394027                                                   | N-Term(iTRAQ4plex)                                                   | 2282.11455 | 85 | 3.54 | Expt1 |
| DLEEFFSTVGK               | 2  | 118403314                                                 | N-Term(iTRAQ4plex), K11(iTRAQ4plex)                                  | 1559.82866 | 85 | 3.60 | Expt1 |

|                             |    |                                                                                                                                                                                                                                                                                                                                                                                                                                                       |                                                                      |            |    |      |       |
|-----------------------------|----|-------------------------------------------------------------------------------------------------------------------------------------------------------------------------------------------------------------------------------------------------------------------------------------------------------------------------------------------------------------------------------------------------------------------------------------------------------|----------------------------------------------------------------------|------------|----|------|-------|
| VFGFSLITNK                  | 2  | 149265958;7305395                                                                                                                                                                                                                                                                                                                                                                                                                                     | N-Term(iTRAQ4plex), K10(iTRAQ4plex)                                  | 1413.84331 | 85 | 3.41 | Expt1 |
| GDVTTQVALQPALK              | 5  | 31980762                                                                                                                                                                                                                                                                                                                                                                                                                                              | N-Term(iTRAQ4plex), K14(iTRAQ4plex)                                  | 1729.01641 | 85 | 3.97 | Expt1 |
| DVQATDTSIEELGR              | 2  | 12963591                                                                                                                                                                                                                                                                                                                                                                                                                                              | N-Term(iTRAQ4plex)                                                   | 1677.84599 | 85 | 3.89 | Expt1 |
| LYIDETVNDNIPLNLR            | 5  | 33859809                                                                                                                                                                                                                                                                                                                                                                                                                                              | N-Term(iTRAQ4plex)                                                   | 2046.09636 | 85 | 3.73 | Expt1 |
| DDGLFSGDPNWFPK              | 6  | 30519911                                                                                                                                                                                                                                                                                                                                                                                                                                              | N-Term(iTRAQ4plex), K14(iTRAQ4plex)                                  | 1882.92522 | 85 | 4.40 | Expt1 |
| YSAPCSAGYGNA                | 5  | 148277039                                                                                                                                                                                                                                                                                                                                                                                                                                             | N-Term(iTRAQ4plex), C5(Methylthio)                                   | 1350.56072 | 84 |      | Expt1 |
| SPESQLFSIEDIQEVR            | 5  | 9790167                                                                                                                                                                                                                                                                                                                                                                                                                                               | N-Term(iTRAQ4plex)                                                   | 2021.03203 | 84 | 4.64 | Expt1 |
| GLAITFVSDENDAK              | 6  | 9790069                                                                                                                                                                                                                                                                                                                                                                                                                                               | N-Term(iTRAQ4plex), K14(iTRAQ4plex)                                  | 1767.94255 | 84 | 4.33 | Expt1 |
| SPWNFLGDLEYSDEEQDSVK        | 2  | 103472025                                                                                                                                                                                                                                                                                                                                                                                                                                             | N-Term(iTRAQ4plex), K22(iTRAQ4plex)                                  | 2903.35105 | 84 | 3.30 | Expt1 |
| SLMPYLLTQAVR                | 1  | 19705424                                                                                                                                                                                                                                                                                                                                                                                                                                              | N-Term(iTRAQ4plex)                                                   | 1682.94609 | 84 |      | Expt1 |
| TAAALLDQFYEK                | 16 | 8394362                                                                                                                                                                                                                                                                                                                                                                                                                                               | N-Term(iTRAQ4plex), K12(iTRAQ4plex)                                  | 1657.90837 | 84 | 3.92 | Expt1 |
| VIPAADLSQQISTAGTEASGTGNMK   | 2  | 24418919                                                                                                                                                                                                                                                                                                                                                                                                                                              | N-Term(iTRAQ4plex), K25(iTRAQ4plex)                                  | 2735.42282 | 83 | 4.67 | Expt1 |
| LSNTSPEFQEMSLER             | 2  | 13507622                                                                                                                                                                                                                                                                                                                                                                                                                                              | N-Term(iTRAQ4plex)                                                   | 2025.01128 | 83 | 4.75 | Expt1 |
| SPPSSAEQSTPAPPTK            | 2  | 31981555                                                                                                                                                                                                                                                                                                                                                                                                                                              | N-Term(iTRAQ4plex), K16(iTRAQ4plex)                                  | 1869.98076 | 83 | 3.66 | Expt1 |
| MLVLDEADEMLNK               | 4  | 51712358;51717030;20149756                                                                                                                                                                                                                                                                                                                                                                                                                            | N-Term(iTRAQ4plex), K13(iTRAQ4plex)                                  | 1808.94646 | 83 | 3.90 | Expt1 |
| IQMLDALTDLTK                | 4  | 62988342                                                                                                                                                                                                                                                                                                                                                                                                                                              | N-Term(iTRAQ4plex), K13(iTRAQ4plex)                                  | 1764.97246 | 83 | 3.14 | Expt1 |
| IPFYGSYTEMDFVIAISEGVK       | 2  | 153791464;153791789                                                                                                                                                                                                                                                                                                                                                                                                                                   | N-Term(iTRAQ4plex), K22(iTRAQ4plex)                                  | 2733.39823 | 83 | 4.37 | Expt1 |
| ALQGASQIIAEIR               | 2  | 71061458;71061455                                                                                                                                                                                                                                                                                                                                                                                                                                     | N-Term(iTRAQ4plex)                                                   | 1513.88762 | 83 | 3.69 | Expt1 |
| GISCMNTTVSESPFK             | 4  | 27754065                                                                                                                                                                                                                                                                                                                                                                                                                                              | N-Term(iTRAQ4plex), C4(Methylthio), K15(iTRAQ4plex)                  | 1934.92778 | 83 | 4.11 | Expt1 |
| SLEEGEGPIAVIMTPTR           | 2  | 149264152;160420299                                                                                                                                                                                                                                                                                                                                                                                                                                   | N-Term(iTRAQ4plex)                                                   | 1944.02434 | 83 | 3.66 | Expt1 |
| VVDLMAYMASK                 | 8  | 149248895;149249564;149249566;149251040;149251044;149251140;149251223;149251463;149251509;149251903;149251905;149251911;149251964;149251966;149252413;149253819;149253823;149257623;149257744;149258770;149258772;149258934;149258938;149259607;149259652;149259964;149260709;149260711;94387946;149260748;149263021;149265154;149265922;149266302;149266427;149266431;149268472;149268967;149270469;149270673;149272161;94408118;149273204;149275059 | N-Term(iTRAQ4plex), M8(Oxidation), K11(iTRAQ4plex)                   | 1531.82073 | 83 | 3.23 | Expt1 |
| NDPSLPEPACVK                | 4  | 219276601;219275596                                                                                                                                                                                                                                                                                                                                                                                                                                   | N-Term(iTRAQ4plex), C10(Methylthio), K12(iTRAQ4plex)                 | 1603.80522 | 82 | 3.68 | Expt1 |
| LTVPLGSENVPYK               | 2  | 110735428;110735426                                                                                                                                                                                                                                                                                                                                                                                                                                   | N-Term(iTRAQ4plex), K13(iTRAQ4plex)                                  | 1704.97685 | 82 | 3.14 | Expt1 |
| ALQDLENAASGDATVR            | 2  | 34328077                                                                                                                                                                                                                                                                                                                                                                                                                                              | N-Term(iTRAQ4plex)                                                   | 1774.90911 | 82 | 4.00 | Expt1 |
| GPFTDVVTTNLK                | 4  | 94721328;31543940                                                                                                                                                                                                                                                                                                                                                                                                                                     | N-Term(iTRAQ4plex), K12(iTRAQ4plex)                                  | 1579.89165 | 82 | 3.40 | Expt1 |
| ETVQTTEDQILK                | 2  | 31543942                                                                                                                                                                                                                                                                                                                                                                                                                                              | N-Term(iTRAQ4plex), K12(iTRAQ4plex)                                  | 1692.92681 | 82 | 4.65 | Expt1 |
| SPFSVGVSPSLDLSK             | 6  | 125347376                                                                                                                                                                                                                                                                                                                                                                                                                                             | N-Term(iTRAQ4plex), K15(iTRAQ4plex)                                  | 1808.01030 | 82 | 4.04 | Expt1 |
| AALDEAQGVGLDSTGYDQEIYGGSDSR | 3  | 153791358                                                                                                                                                                                                                                                                                                                                                                                                                                             | N-Term(iTRAQ4plex)                                                   | 3081.39731 | 82 | 3.63 | Expt1 |
| TTPMLQLQPPEPSR              | 5  | 124487155                                                                                                                                                                                                                                                                                                                                                                                                                                             | N-Term(iTRAQ4plex)                                                   | 1770.91973 | 82 | 3.62 | Expt1 |
| VLFFDELDSIAK                | 3  | 94408011                                                                                                                                                                                                                                                                                                                                                                                                                                              | N-Term(iTRAQ4plex), K12(iTRAQ4plex)                                  | 1684.94927 | 82 | 3.30 | Expt1 |
| GVQAGNSDTEGGQPGR            | 2  | 194394197;146231985;194394192;194394195                                                                                                                                                                                                                                                                                                                                                                                                               | N-Term(iTRAQ4plex)                                                   | 1673.80266 | 82 | 3.76 | Expt1 |
| SLLELQMSSNPLGDGEGVELCK      | 4  | 31981748;285402638;285402659                                                                                                                                                                                                                                                                                                                                                                                                                          | N-Term(iTRAQ4plex), M7(Oxidation), C21(Methylthio), K22(iTRAQ4plex)  | 2740.35587 | 82 | 4.05 | Expt1 |
| VLYPNDNFFEGK                | 3  | 6755256;24418919;268836255                                                                                                                                                                                                                                                                                                                                                                                                                            | N-Term(iTRAQ4plex), K12(iTRAQ4plex)                                  | 1730.90068 | 81 | 3.24 | Expt1 |
| FQAGNGSWGYPYINGTLK          | 7  | 9790161                                                                                                                                                                                                                                                                                                                                                                                                                                               | N-Term(iTRAQ4plex), N5(Deamidated), N14(Deamidated), K18(iTRAQ4plex) | 2263.12969 | 81 | 3.56 | Expt1 |
| FQDVPSAGGESVAGGGTVATALDK    | 4  | 33563246                                                                                                                                                                                                                                                                                                                                                                                                                                              | N-Term(iTRAQ4plex), K24(iTRAQ4plex)                                  | 2522.30472 | 81 | 3.47 | Expt1 |
| SQLPTLEQDGGTPNAVSSPGMSQELR  | 6  | 6678615;283945493                                                                                                                                                                                                                                                                                                                                                                                                                                     | N-Term(iTRAQ4plex)                                                   | 2843.40415 | 81 | 4.46 | Expt1 |
| DLQQSIEAASDEEDLR            | 2  | 163644252                                                                                                                                                                                                                                                                                                                                                                                                                                             | N-Term(iTRAQ4plex)                                                   | 1962.93620 | 81 | 3.63 | Expt1 |
| FFDDPMLLELAK                | 2  | 6755594;158508674                                                                                                                                                                                                                                                                                                                                                                                                                                     | N-Term(iTRAQ4plex), K12(iTRAQ4plex)                                  | 1726.94158 | 81 | 3.15 | Expt1 |

|                                 |    |                                                                                                            |                                                      |            |    |      |       |
|---------------------------------|----|------------------------------------------------------------------------------------------------------------|------------------------------------------------------|------------|----|------|-------|
| MQQVEASLQPETLR                  | 12 | 124517726;86476056;1603337<br>10;6680586;130503301;148747<br>546;269973939                                 | N-Term(iTRAQ4plex), M1(Oxidation)                    | 1789.92668 | 81 | 5.05 | Expt1 |
| IGADGTQVAMVQFTDDPR              | 8  | 226423922                                                                                                  | N-Term(iTRAQ4plex)                                   | 2065.01470 | 80 | 3.83 | Expt1 |
| DMSPLPESEVTLGK                  | 2  | 148747189                                                                                                  | N-Term(iTRAQ4plex), K14(iTRAQ4plex)                  | 1790.94780 | 80 | 3.48 | Expt1 |
| TALAYECFQDDNSTLALPSDQK          | 5  | 9790161                                                                                                    | N-Term(iTRAQ4plex), C7(Methylthio), K23(iTRAQ4plex)  | 2892.36820 | 80 | 3.44 | Expt1 |
| AIAGQGVYDITVDVLTNR              | 3  | 145864475                                                                                                  | N-Term(iTRAQ4plex)                                   | 2164.14072 | 80 | 4.10 | Expt1 |
| DAALMVTNDGATILK                 | 4  | 126521835                                                                                                  | N-Term(iTRAQ4plex), K15(iTRAQ4plex)                  | 1821.00737 | 80 | 3.23 | Expt1 |
| ASGQAFELILSPR                   | 7  | 149252580;9789995                                                                                          | N-Term(iTRAQ4plex)                                   | 1532.85893 | 80 | 4.56 | Expt1 |
| GGGGPGGGGPGGGGASGGPSQPPGGGGPGIR | 2  | 163954948                                                                                                  | N-Term(iTRAQ4plex)                                   | 2471.19596 | 79 | 4.37 | Expt1 |
| VMALSLVGADPEQLR                 | 6  | 115647999                                                                                                  | N-Term(iTRAQ4plex)                                   | 1742.96042 | 79 | 3.81 | Expt1 |
| YAALANLDNIFASAGQGGDQSGFGTTGK    | 2  | 33563260                                                                                                   | N-Term(iTRAQ4plex), K28(iTRAQ4plex)                  | 3005.48197 | 79 | 4.27 | Expt1 |
| SDVEIPATVTFASFEDDSAPLSPLK       | 3  | 31542111;255759888;2557598<br>90                                                                           | N-Term(iTRAQ4plex), K25(iTRAQ4plex)                  | 2924.50467 | 79 | 3.53 | Expt1 |
| ELFPVQMEGVK                     | 4  | 157909797                                                                                                  | N-Term(iTRAQ4plex), K11(iTRAQ4plex)                  | 1564.87847 | 79 | 3.43 | Expt1 |
| GASYLLMGQVEENR                  | 4  | 125490382                                                                                                  | N-Term(iTRAQ4plex), M7(Oxidation)                    | 1726.85832 | 79 | 2.94 | Expt1 |
| QLQSEQPQTAAAR                   | 5  | 31981588                                                                                                   | N-Term(iTRAQ4plex)                                   | 1571.82805 | 78 | 4.23 | Expt1 |
| SIDGTADEDEGVPTDQAIR             | 2  | 66955886                                                                                                   | N-Term(iTRAQ4plex)                                   | 2248.04204 | 78 | 4.33 | Expt1 |
| ISMPDVLNIK                      | 2  | 61743961                                                                                                   | N-Term(iTRAQ4plex), K11(iTRAQ4plex)                  | 1532.86614 | 78 | 4.07 | Expt1 |
| GFSSGSAVVSQGSR                  | 1  | 124487419                                                                                                  | N-Term(iTRAQ4plex)                                   | 1398.70842 | 78 |      | Expt1 |
| ASVPTIQDQASAMQLSQCAK            | 2  | 227116327                                                                                                  | N-Term(iTRAQ4plex), C18(Methylthio), K20(iTRAQ4plex) | 2411.21189 | 78 | 4.65 | Expt1 |
| AEIINQDLFEQLER                  | 2  | 37537522                                                                                                   | N-Term(iTRAQ4plex)                                   | 1861.98308 | 78 | 4.19 | Expt1 |
| SEDEVGSLIEYEFR                  | 5  | 31982236                                                                                                   | N-Term(iTRAQ4plex)                                   | 1816.87944 | 78 | 4.46 | Expt1 |
| NAFACFDEEATGTIQEDYLR            | 2  | 21728376                                                                                                   | N-Term(iTRAQ4plex), C5(Methylthio)                   | 2483.10917 | 78 | 4.50 | Expt1 |
| SGEDESQEDVLMDEAPSNLSQASTLQANR   | 2  | 146231996                                                                                                  | N-Term(iTRAQ4plex)                                   | 3265.48569 | 78 | 4.29 | Expt1 |
| SLDPFFETYINALR                  | 6  | 133778953                                                                                                  | N-Term(iTRAQ4plex)                                   | 1829.96050 | 78 | 3.70 | Expt1 |
| TVQELLPASFGPEDLQK               | 2  | 58037289                                                                                                   | N-Term(iTRAQ4plex), K17(iTRAQ4plex)                  | 2160.18389 | 78 | 3.50 | Expt1 |
| VDSNGFLIDGYPR                   | 2  | 10946936                                                                                                   | N-Term(iTRAQ4plex), N5(Deamidated)                   | 1684.83306 | 78 | 3.90 | Expt1 |
| DADSIITLFDVQKK                  | 2  | 226823359                                                                                                  | N-Term(iTRAQ4plex), K13(iTRAQ4plex)                  | 1767.94451 | 78 | 3.68 | Expt1 |
| TYSYLTPLDK                      | 3  | 82898647;149255335;9438378<br>2;94383784;149259263;635944<br>66;149263154;149265803;9440<br>4463;149269495 | N-Term(iTRAQ4plex), K11(iTRAQ4plex)                  | 1674.90117 | 78 | 3.65 | Expt1 |
| TYSYLTPLNWK                     | 3  | 82890069;82902507;14925154<br>0                                                                            | N-Term(iTRAQ4plex), N8(Deamidated), K11(iTRAQ4plex)  | 1674.90117 | 78 | 3.65 | Expt1 |
| VTAYTVDVTGR                     | 4  | 61743961                                                                                                   | N-Term(iTRAQ4plex)                                   | 1325.72185 | 78 | 3.69 | Expt1 |
| TIPGTALVEMGDEYAVR               | 4  | 110347535                                                                                                  | N-Term(iTRAQ4plex)                                   | 2095.05411 | 78 | 4.07 | Expt1 |
| EIETQTLLSPGSGR                  | 3  | 170014682;170014686                                                                                        | N-Term(iTRAQ4plex)                                   | 1760.91728 | 78 | 3.99 | Expt1 |
| VINQLTMDGMSTK                   | 6  | 225543319;94408011                                                                                         | N-Term(iTRAQ4plex), K15(iTRAQ4plex)                  | 1968.04460 | 77 | 3.98 | Expt1 |
| DVVELTDDTDFDK                   | 2  | 149262992;58037267                                                                                         | N-Term(iTRAQ4plex), K12(iTRAQ4plex)                  | 1684.84783 | 77 | 3.00 | Expt1 |
| AFFPCFDTPAVK                    | 8  | 227499103;227499234                                                                                        | N-Term(iTRAQ4plex), C5(Methylthio), K12(iTRAQ4plex)  | 1676.84648 | 77 | 3.51 | Expt1 |
| LTPEYLQLMK                      | 1  | 23956396                                                                                                   | N-Term(iTRAQ4plex), K10(iTRAQ4plex)                  | 1523.88127 | 77 |      | Expt1 |
| DLANGNITWADVEAR                 | 3  | 93102417                                                                                                   | N-Term(iTRAQ4plex), N4(Deamidated)                   | 1789.88884 | 77 | 3.47 | Expt1 |
| STGGAPTFNVTVTMTAK               | 5  | 6755040                                                                                                    | N-Term(iTRAQ4plex), M14(Oxidation), K17(iTRAQ4plex)  | 1987.04595 | 77 | 3.64 | Expt1 |
| NTGASSGATSEESTEAEFCR            | 2  | 149257881                                                                                                  | N-Term(iTRAQ4plex), C19(Methylthio)                  | 2223.92485 | 77 | 3.59 | Expt1 |
| TMLELLNQLDGFQPNQVQK             | 2  | 228008337                                                                                                  | N-Term(iTRAQ4plex), K19(iTRAQ4plex)                  | 2477.33567 | 77 | 3.47 | Expt1 |
| LNIISNLDCVNEVIGIR               | 2  | 77539776;77539770;8394027                                                                                  | N-Term(iTRAQ4plex), C9(Methylthio)                   | 2075.11686 | 77 | 3.13 | Expt1 |
| SLQADISQAQIINSDPSPDAQALR        | 2  | 121949760                                                                                                  | N-Term(iTRAQ4plex)                                   | 2784.44144 | 77 | 4.85 | Expt1 |
| AIANECQANFISIK                  | 4  | 225543319;94408011                                                                                         | N-Term(iTRAQ4plex), C6(Methylthio), K14(iTRAQ4plex)  | 1855.96587 | 77 | 4.66 | Expt1 |
| IIFYQDEGSLTK                    | 2  | 21704174                                                                                                   | N-Term(iTRAQ4plex), K12(iTRAQ4plex)                  | 1701.93450 | 76 | 4.21 | Expt1 |
| NTFTESAGSR                      | 5  | 111074529                                                                                                  | N-Term(iTRAQ4plex)                                   | 1213.59363 | 76 | 2.88 | Expt1 |
| WNTDSVEEFLSEK                   | 1  | 16716395                                                                                                   | N-Term(iTRAQ4plex), K13(iTRAQ4plex)                  | 1871.93657 | 76 |      | Expt1 |
| VSSLPTVYLK                      | 2  | 6753556                                                                                                    | N-Term(iTRAQ4plex), K10(iTRAQ4plex)                  | 1394.86040 | 76 | 3.31 | Expt1 |
| EEIIPVAPEYDK                    | 3  | 6680618                                                                                                    | N-Term(iTRAQ4plex), K12(iTRAQ4plex)                  | 1690.91863 | 76 | 3.34 | Expt1 |
| APQETYADIGLDNLIQIEIK            | 4  | 6679501                                                                                                    | N-Term(iTRAQ4plex), K20(iTRAQ4plex)                  | 2491.29801 | 76 | 5.30 | Expt1 |
| APFLETDLK                       | 2  | 31791059                                                                                                   | N-Term(iTRAQ4plex), K10(iTRAQ4plex)                  | 1449.82646 | 76 | 2.94 | Expt1 |
| YIAENGTDPINNQLSEEQLDIK          | 2  | 19527358                                                                                                   | N-Term(iTRAQ4plex), N5(Deamidated), K24(iTRAQ4plex)  | 3003.54673 | 76 | 4.67 | Expt1 |

|                            |    |                                                                     |                                                     |            |    |      |       |
|----------------------------|----|---------------------------------------------------------------------|-----------------------------------------------------|------------|----|------|-------|
| EGPQDVEEVPALTAR            | 2  | 114052811                                                           | N-Term(iTRAQ4plex)                                  | 1997.98650 | 76 | 3.33 | Expt1 |
| APLATGEDDDDEVLDVENFDEASK   | 2  | 149234234;56605979                                                  | N-Term(iTRAQ4plex), K25(iTRAQ4plex)                 | 2979.39511 | 76 | 4.19 | Expt1 |
| LSQLEEELEEFQNSSELLK        | 6  | 29336026                                                            | N-Term(iTRAQ4plex), K19(iTRAQ4plex)                 | 2562.31491 | 75 | 3.75 | Expt1 |
| EYIPTVFDNYSAQSAVDGR        | 2  | 9625037                                                             | N-Term(iTRAQ4plex)                                  | 2276.09892 | 75 | 3.59 | Expt1 |
| ESVPDFPLSPPK               | 2  | 149252580;9789995                                                   | N-Term(iTRAQ4plex), K12(iTRAQ4plex)                 | 1600.89128 | 75 | 3.32 | Expt1 |
| QNLDPLEFYINNLNR            | 90 | 20911031                                                            | N-Term(iTRAQ4plex), N2(Deamidated), N12(Deamidated) | 2023.02507 | 75 | 1.43 | 6.11  |
| AQVAQPGGDTIFGK             | 2  | 33468857                                                            | N-Term(iTRAQ4plex), K14(iTRAQ4plex)                 | 1676.92156 | 75 | 3.69 | Expt1 |
| QSSYQQSYNNQQQNTSSGGQGR     | 2  | 30794412                                                            | N-Term(iTRAQ4plex)                                  | 2891.26975 | 75 | 3.05 | Expt1 |
| ESGVELFAIGVK               | 11 | 226423922                                                           | N-Term(iTRAQ4plex), K12(iTRAQ4plex)                 | 1536.89092 | 75 | 3.66 | Expt1 |
| YADESGNMFDFNFISCLVR        | 2  | 110227381                                                           | N-Term(iTRAQ4plex), C16(Methylthio)                 | 2386.03105 | 75 | 3.25 | Expt1 |
| GAAIEALNDGELQK             | 6  | 19526912                                                            | N-Term(iTRAQ4plex), K14(iTRAQ4plex)                 | 1716.94585 | 75 | 4.11 | Expt1 |
| LGDESCFNMILATR             | 1  | 160707958                                                           | N-Term(iTRAQ4plex), C7(Methylthio), M10(Oxidation)  | 1876.87651 | 75 |      | Expt1 |
| NGVQAMVEFDSVQSAQR          | 10 | 183980004                                                           | N-Term(iTRAQ4plex), N1(Deamidated)                  | 2010.97405 | 75 | 4.07 | Expt1 |
| TVFGELPSGGGTVEK            | 2  | 28892785                                                            | N-Term(iTRAQ4plex), K15(iTRAQ4plex)                 | 1765.96391 | 75 | 3.21 | Expt1 |
| TPADCPVIAIDFR              | 10 | 19072792                                                            | N-Term(iTRAQ4plex), C5(Methylthio)                  | 1694.84233 | 75 | 3.42 | Expt1 |
| EIYDFGEEGLK                | 3  | 21313156                                                            | N-Term(iTRAQ4plex), K12(iTRAQ4plex)                 | 1715.87956 | 75 | 2.91 | Expt1 |
| LLGATELPIVTPALR            | 3  | 149250822;149250824                                                 | N-Term(iTRAQ4plex)                                  | 1708.05217 | 75 | 3.31 | Expt1 |
| YLLSQSSPAPLTAEEELR         | 6  | 62990169                                                            | N-Term(iTRAQ4plex)                                  | 2219.17046 | 75 | 4.29 | Expt1 |
| LLYEALVDCK                 | 3  | 21703762                                                            | N-Term(iTRAQ4plex), C9(Methylthio), K10(iTRAQ4plex) | 1500.80705 | 74 | 2.92 | Expt1 |
| GIMEEDSYPIYIGK             | 2  | 166235890                                                           | N-Term(iTRAQ4plex), K13(iTRAQ4plex)                 | 1789.89055 | 74 | 4.55 | Expt1 |
| CEQSEELDNLIK               | 3  | 70909345                                                            | N-Term(iTRAQ4plex), C1(Methylthio), K12(iTRAQ4plex) | 1754.85881 | 74 | 4.41 | Expt1 |
| NGSEADIDESLYSR             | 4  | 6678483                                                             | N-Term(iTRAQ4plex), N1(Deamidated)                  | 1700.77764 | 74 | 4.22 | Expt1 |
| DEPDWESLIFLAR              | 2  | 82801181;85861218                                                   | N-Term(iTRAQ4plex)                                  | 1734.88872 | 74 | 3.58 | Expt1 |
| ESEITDEDIDGLER             | 4  | 40254124                                                            | N-Term(iTRAQ4plex)                                  | 1877.91435 | 74 | 3.85 | Expt1 |
| INVTGIPDELSEEQTR           | 3  | 33469125                                                            | N-Term(iTRAQ4plex)                                  | 1944.99956 | 74 | 3.14 | Expt1 |
| ATSNVFMFDDQSQIQEFK         | 2  | 21728376;71037403;19827855<br>3                                     | N-Term(iTRAQ4plex), K18(iTRAQ4plex)                 | 2379.19707 | 74 |      | Expt1 |
| TFVSGACDASIK               | 3  | 13937391                                                            | N-Term(iTRAQ4plex), C7(Methylthio), K12(iTRAQ4plex) | 1532.77104 | 74 | 3.87 | Expt1 |
| TFSYAGFEMQPK               | 2  | 238814391                                                           | N-Term(iTRAQ4plex), K12(iTRAQ4plex)                 | 1693.85185 | 74 | 4.02 | Expt1 |
| DSYVGDEAQS                 | 4  | 6671509;6752954;6671507;157<br>823889;14192922;33563240             | N-Term(iTRAQ4plex), K11(iTRAQ4plex)                 | 1486.73699 | 74 | 3.71 | Expt1 |
| GSIFAVFDSIQSAK             | 7  | 6678143                                                             | N-Term(iTRAQ4plex), K14(iTRAQ4plex)                 | 1757.96953 | 74 | 3.71 | Expt1 |
| LVQLFPSDITLK               | 4  | 125628659                                                           | N-Term(iTRAQ4plex), K12(iTRAQ4plex)                 | 1649.97844 | 74 | 3.69 | Expt1 |
| ELDEYFTQANDQMEIIDGLIR      | 3  | 82950147;82950149;14926408<br>6                                     | N-Term(iTRAQ4plex), M13(Oxidation)                  | 2673.29514 | 74 | 3.91 | Expt1 |
| AVVQVFEGTSGIDAK            | 2  | 19705578                                                            | N-Term(iTRAQ4plex), K15(iTRAQ4plex)                 | 1809.00290 | 74 | 3.53 | Expt1 |
| AQEAAAEPPPAVTPAASVSLDLGEQR | 6  | 225703070                                                           | N-Term(iTRAQ4plex)                                  | 2919.48740 | 74 | 3.81 | Expt1 |
| ELLEQVAEFEK                | 2  | 82998566;15277319                                                   | N-Term(iTRAQ4plex), K11(iTRAQ4plex)                 | 1622.89556 | 73 | 3.43 | Expt1 |
| MQEVYFNAINNSEIR            | 4  | 116734870                                                           | N-Term(iTRAQ4plex)                                  | 2086.01689 | 73 | 4.58 | Expt1 |
| TAMVATVSPAADNYDELSTLR      | 5  | 124487163                                                           | N-Term(iTRAQ4plex)                                  | 2470.23337 | 73 | 4.24 | Expt1 |
| VLSYAPGPLDNMQQLAR          | 3  | 160333789                                                           | N-Term(iTRAQ4plex)                                  | 2132.09580 | 73 | 3.85 | Expt1 |
| AAVQQLQAEGLSPR             | 2  | 27413160                                                            | N-Term(iTRAQ4plex)                                  | 1611.89543 | 73 | 3.20 | Expt1 |
| GLWPGVEDLSLNK              | 1  | 21699058                                                            | N-Term(iTRAQ4plex), K13(iTRAQ4plex)                 | 1715.96062 | 73 |      | Expt1 |
| EFLAEGQDVGSFVAEK           | 2  | 56699432;56699434                                                   | N-Term(iTRAQ4plex), K16(iTRAQ4plex)                 | 2014.04697 | 73 | 3.73 | Expt1 |
| SASPDDDLGSNNWEAADLGNNEER   | 3  | 9790217                                                             | N-Term(iTRAQ4plex)                                  | 2579.11724 | 73 | 2.96 | Expt1 |
| SSTPLPTVSSAENR             | 2  | 121949767;121949779;121949<br>760;121949763;121949765;121<br>949769 | N-Term(iTRAQ4plex)                                  | 1777.90801 | 73 | 3.40 | Expt1 |
| VAQSLCGEDLIK               | 5  | 21704096;56682931;56682933;<br>56682935;56682929                    | N-Term(iTRAQ4plex), C6(Methylthio), K13(iTRAQ4plex) | 1722.94426 | 73 | 3.49 | Expt1 |
| ISFLENNLEQLTK              | 2  | 61657921;45433560;40254635                                          | N-Term(iTRAQ4plex), K13(iTRAQ4plex)                 | 1837.04155 | 73 | 4.98 | Expt1 |
| AVIFCLSADK                 | 2  | 9790219                                                             | N-Term(iTRAQ4plex), C5(Methylthio), K10(iTRAQ4plex) | 1400.75676 | 73 | 3.50 | Expt1 |
| DVPNPNQVDDDEGFR            | 2  | 144922627                                                           | N-Term(iTRAQ4plex)                                  | 1975.87212 | 73 | 3.37 | Expt1 |
| DILTNSGIDIEK               | 2  | 149267864;75677437                                                  | N-Term(iTRAQ4plex), N6(Deamidated), K12(iTRAQ4plex) | 1606.88518 | 73 | 3.76 | Expt1 |
| EAEETQNSLQAECDQYR          | 5  | 124486712                                                           | N-Term(iTRAQ4plex), C13(Methylthio)                 | 2203.93633 | 73 | 4.18 | Expt1 |

|                                 |    |                                                                                                                |                                                                      |            |    |      |       |       |
|---------------------------------|----|----------------------------------------------------------------------------------------------------------------|----------------------------------------------------------------------|------------|----|------|-------|-------|
| TNVDQTMCLDINECER                | 3  | 118197277                                                                                                      | N-Term(iTRAQ4plex), M7(Oxidation), C8(Methylthio), C14(Methylthio)   | 2135.86675 | 72 |      | Expt1 |       |
| MNLASSFVNGFVNAAFQDK             | 2  | 149260701;19882201                                                                                             | N-Term(iTRAQ4plex), M1(Oxidation), N9(Deamidated), K20(iTRAQ4plex)   | 2422.19657 | 72 | 3.43 | Expt1 |       |
| GMSADPEEYDLADLSSLPEIDK          | 2  | 6679421                                                                                                        | N-Term(iTRAQ4plex), K22(iTRAQ4plex)                                  | 2683.30156 | 72 | 2.95 | Expt1 |       |
| SEGALELADVSAELPGLK              | 2  | 31542461                                                                                                       | N-Term(iTRAQ4plex), K18(iTRAQ4plex)                                  | 2087.15311 | 72 | 3.76 | Expt1 |       |
| LSDNTIGQEEIIQQR                 | 6  | 115496850                                                                                                      | N-Term(iTRAQ4plex)                                                   | 1889.93205 | 72 | 4.59 | Expt1 |       |
| TLYNNQPIDFLK                    | 7  | 30519997                                                                                                       | N-Term(iTRAQ4plex), K12(iTRAQ4plex)                                  | 1753.98332 | 72 | 4.13 | Expt1 |       |
| FNISNGGPAPEAITDK                | 4  | 227330633                                                                                                      | N-Term(iTRAQ4plex), N5(Deamidated), K16(iTRAQ4plex)                  | 1919.99895 | 72 | 4.29 | Expt1 |       |
| LAQYYLVYQPIPTAQLVQR             | 2  | 134031994                                                                                                      | N-Term(iTRAQ4plex)                                                   | 2665.45823 | 72 | 5.17 | Expt1 |       |
| SPEGTTVSGYDIMK                  | 2  | 41152239;226874922                                                                                             | N-Term(iTRAQ4plex), K14(iTRAQ4plex)                                  | 1772.89409 | 72 | 3.91 | Expt1 |       |
| AVCMLSNTTAAIEAWAR               | 8  | 6755901;34740335;6678465;6678467;51765047;82930560;8394493;6678469                                             | N-Term(iTRAQ4plex), C3(Methylthio), M4(Oxidation)                    | 2013.97185 | 72 | 3.29 | Expt1 |       |
| LTLQPVDNSTISLQMGTK              | 4  | 149251847;21312564                                                                                             | N-Term(iTRAQ4plex), M15(Oxidation), K19(iTRAQ4plex)                  | 2364.27646 | 72 | 4.39 | Expt1 |       |
| NHEEELQSFQAGGPGVENVEMDAAPGVDLTK | 4  | 118130981                                                                                                      | N-Term(iTRAQ4plex), K31(iTRAQ4plex)                                  | 3556.71384 | 72 | 5.25 | Expt1 |       |
| YSSVYGASVSDDLK                  | 2  | 149254953;21313618                                                                                             | N-Term(iTRAQ4plex), K15(iTRAQ4plex)                                  | 1907.95549 | 72 | 3.31 | Expt1 |       |
| AEVGVPAEFGIWTR                  | 2  | 125347376                                                                                                      | N-Term(iTRAQ4plex)                                                   | 1675.89678 | 71 | 3.21 | Expt1 |       |
| AVFPQNGLVVSSVDVQSVQVQQR         | 7  | 239052674                                                                                                      | N-Term(iTRAQ4plex), N6(Deamidated)                                   | 2714.42026 | 71 | 3.74 | Expt1 |       |
| SLGQNPTAEALQGMVNEIDK            | 4  | 13386230                                                                                                       | N-Term(iTRAQ4plex), K20(iTRAQ4plex)                                  | 2461.25589 | 71 | 4.76 | Expt1 |       |
| ILLENLGEASSQPSPTQYAQEARR        | 4  | 122114537                                                                                                      | N-Term(iTRAQ4plex)                                                   | 2717.39060 | 71 | 5.20 | Expt1 |       |
| LIEEVMIGEDK                     | 2  | 126521835                                                                                                      | N-Term(iTRAQ4plex), M6(Oxidation), K11(iTRAQ4plex)                   | 1579.85967 | 71 |      | Expt1 |       |
| VVGELAQMGYNLATK                 | 2  | 165972309                                                                                                      | N-Term(iTRAQ4plex), K17(iTRAQ4plex)                                  | 2123.18222 | 71 | 4.35 | Expt1 |       |
| LGMENDTAVQYAIGR                 | 2  | 13195628                                                                                                       | N-Term(iTRAQ4plex)                                                   | 1896.92009 | 71 | 3.70 | Expt1 |       |
| ALMGLYNGQVLCK                   | 2  | 33859811                                                                                                       | N-Term(iTRAQ4plex), N7(Deamidated), C12(Methylthio), K13(iTRAQ4plex) | 1744.90727 | 71 | 3.48 | Expt1 |       |
| SYIITGGLGGFGLRLAR               | 2  | 93102409                                                                                                       | N-Term(iTRAQ4plex)                                                   | 1868.04270 | 71 | 3.87 | Expt1 |       |
| AMGIMNSFVNDIFER                 | 64 | 68131547;68226433;30061385;149264032;160420312;46049029;28316760;68226431;160420308;30089704;30061387;13386452 | N-Term(iTRAQ4plex), M5(Oxidation), N6(Deamidated), N10(Deamidated)   | 1905.88640 | 71 | 1.23 | 6.71  | Expt1 |
| VMVELLGSYTEDNASQAR              | 2  | 21703762                                                                                                       | N-Term(iTRAQ4plex), M2(Oxidation)                                    | 2143.04917 | 71 | 3.26 | Expt1 |       |
| TLSPPTSAEGYQDVR                 | 3  | 157057145;157057174;157057554                                                                                  | N-Term(iTRAQ4plex)                                                   | 1764.88921 | 71 | 3.08 | Expt1 |       |
| EELGDEWLTPDLFR                  | 2  | 27777677                                                                                                       | N-Term(iTRAQ4plex)                                                   | 1863.93291 | 71 | 3.80 | Expt1 |       |
| DTFFQNPQYVFEVK                  | 2  | 6680846                                                                                                        | N-Term(iTRAQ4plex), K14(iTRAQ4plex)                                  | 2050.05327 | 70 | 3.22 | Expt1 |       |
| VPDSTYEMIGGLDK                  | 1  | 7110703                                                                                                        | N-Term(iTRAQ4plex), K14(iTRAQ4plex)                                  | 1812.94036 | 70 |      | Expt1 |       |
| SVILEAFSSPSEEVK                 | 3  | 189409138                                                                                                      | N-Term(iTRAQ4plex), K15(iTRAQ4plex)                                  | 1910.04411 | 70 | 3.84 | Expt1 |       |
| TWPAIIDTDLPR                    | 2  | 226823258;226823266                                                                                            | N-Term(iTRAQ4plex)                                                   | 1656.87456 | 70 | 3.01 | Expt1 |       |
| NEGSESAPEGQAQQR                 | 4  | 149252935;113205059                                                                                            | N-Term(iTRAQ4plex)                                                   | 1731.80718 | 70 | 3.52 | Expt1 |       |
| ELGSPPGISLETIDAFAFCPGSSR        | 4  | 160358829                                                                                                      | N-Term(iTRAQ4plex), C19(Methylthio)                                  | 2581.24692 | 70 | 4.96 | Expt1 |       |
| SADTLWGIQK                      | 2  | 6754524;257743039                                                                                              | N-Term(iTRAQ4plex), K10(iTRAQ4plex)                                  | 1406.78276 | 70 | 3.62 | Expt1 |       |
| EAAGEGVPVLYEDPPDQK              | 3  | 6753086                                                                                                        | N-Term(iTRAQ4plex), K17(iTRAQ4plex)                                  | 2103.04839 | 70 | 3.95 | Expt1 |       |
| VNVAGLVLAGSADFK                 | 2  | 124286826                                                                                                      | N-Term(iTRAQ4plex), K15(iTRAQ4plex)                                  | 1749.02726 | 70 | 3.46 | Expt1 |       |
| MLPTIADNAGYDSADLVAQLR           | 2  | 126521835                                                                                                      | N-Term(iTRAQ4plex), M1(Oxidation)                                    | 2507.30326 | 70 | 3.29 | Expt1 |       |
| AAQASLNALNDPIAVEQALQEK          | 2  | 110431378                                                                                                      | N-Term(iTRAQ4plex), K22(iTRAQ4plex)                                  | 2582.41404 | 70 | 4.30 | Expt1 |       |
| EAEVQIDQVLTESESEAVMDR           | 2  | 226423935                                                                                                      | N-Term(iTRAQ4plex)                                                   | 2650.27237 | 70 | 4.28 | Expt1 |       |
| AILGSYDSELSTQTEYSTQLTQR         | 2  | 88014564                                                                                                       | N-Term(iTRAQ4plex)                                                   | 2648.32322 | 70 | 3.75 | Expt1 |       |
| YNLVGAETVLTQMR                  | 8  | 149270322;124487099                                                                                            | N-Term(iTRAQ4plex)                                                   | 1738.93364 | 70 | 3.72 | Expt1 |       |
| DLNSQADSLMTSSAFDTSQVK           | 2  | 115496850                                                                                                      | N-Term(iTRAQ4plex), K21(iTRAQ4plex)                                  | 2533.24051 | 70 | 2.84 | Expt1 |       |
| YSIDPESTEGEVIFR                 | 7  | 114326497                                                                                                      | N-Term(iTRAQ4plex)                                                   | 1885.93108 | 70 | 3.18 | Expt1 |       |
| AFVEVNEEGTEAAAATAGMMTVR         | 2  | 6678097;255759941                                                                                              | N-Term(iTRAQ4plex)                                                   | 2499.20725 | 70 | 4.94 | Expt1 |       |
| VPPETIDSVIVGNVMQSSSDAAYLAR      | 4  | 29126205                                                                                                       | N-Term(iTRAQ4plex)                                                   | 2863.47416 | 70 | 4.57 | Expt1 |       |
| VLNTNIDGR                       | 6  | 6755368;149259085;149263957;149264584;149264635                                                                | N-Term(iTRAQ4plex)                                                   | 1145.64026 | 70 | 3.42 | Expt1 |       |
| MTVNESEQLVSCSMDDTVR             | 8  | 6755995                                                                                                        | N-Term(iTRAQ4plex), M1(Oxidation), C12(Methylthio)                   | 2350.01474 | 70 | 5.10 | Expt1 |       |
| LPNFGFVFFDSEPVQK                | 7  | 7305075                                                                                                        | N-Term(iTRAQ4plex), K17(iTRAQ4plex)                                  | 2226.16385 | 70 | 3.95 | Expt1 |       |

|                            |   |                                         |                                                                                                                      |            |    |      |       |
|----------------------------|---|-----------------------------------------|----------------------------------------------------------------------------------------------------------------------|------------|----|------|-------|
| QLEPIYTSLGK                | 2 | 86198316                                | N-Term(iTRAQ4plex), K11(iTRAQ4plex)                                                                                  | 1536.89177 | 69 | 3.20 | Expt1 |
| SCCSCCPVGCCK               | 4 | 33468863                                | N-Term(iTRAQ4plex), C2(Methylthio), C3(Methylthio), C5(Methylthio), C6(Methylthio), C10(Methylthio), K12(iTRAQ4plex) | 1678.54387 | 69 |      | Expt1 |
| GYSFSLTTFSPSGK             | 5 | 134031994                               | N-Term(iTRAQ4plex), K14(iTRAQ4plex)                                                                                  | 1766.93242 | 69 | 3.59 | Expt1 |
| TIYAGNALCTVK               | 2 | 227500281                               | N-Term(iTRAQ4plex), C9(Methylthio), K12(iTRAQ4plex)                                                                  | 1587.84526 | 69 | 3.25 | Expt1 |
| IGNTGGMLDNILASK            | 2 | 29293809                                | N-Term(iTRAQ4plex), K15(iTRAQ4plex)                                                                                  | 1791.98894 | 69 | 4.04 | Expt1 |
| ADAVQEATFQVELPR            | 2 | 226531047;226531069                     | N-Term(iTRAQ4plex)                                                                                                   | 1817.95200 | 69 | 3.92 | Expt1 |
| TVQDALESVLR                | 6 | 6678493                                 | N-Term(iTRAQ4plex)                                                                                                   | 1445.81133 | 69 | 3.31 | Expt1 |
| LVSEFPYIEAEVK              | 2 | 224922803                               | N-Term(iTRAQ4plex), K13(iTRAQ4plex)                                                                                  | 1812.00762 | 69 | 3.17 | Expt1 |
| NYNDELQFLDK                | 2 | 21703842                                | N-Term(iTRAQ4plex), K11(iTRAQ4plex)                                                                                  | 1686.85674 | 69 | 4.05 | Expt1 |
| VEQPIVDIMFNDFGEASQK        | 2 | 164565411                               | N-Term(iTRAQ4plex), K20(iTRAQ4plex)                                                                                  | 2554.31449 | 69 | 3.04 | Expt1 |
| VGEVTVYVLLMDAEGK           | 7 | 21313308;158186704                      | N-Term(iTRAQ4plex), K16(iTRAQ4plex)                                                                                  | 2041.08464 | 69 | 3.96 | Expt1 |
| WNSPAEEGLSDCEVFPK          | 6 | 112293266                               | N-Term(iTRAQ4plex), C12(Methylthio), K17(iTRAQ4plex)                                                                 | 2242.04605 | 69 | 3.65 | Expt1 |
| IMEGPAFNLDAPAVR            | 8 | 18152793                                | N-Term(iTRAQ4plex)                                                                                                   | 1891.98992 | 69 | 3.94 | Expt1 |
| EAAQMDMNVGDVEDLR           | 1 | 10092608                                | N-Term(iTRAQ4plex), M5(Oxidation), M7(Oxidation)                                                                     | 1968.88005 | 69 |      | Expt1 |
| VVVDNNGTGFVK               | 2 | 22122825                                | N-Term(iTRAQ4plex), C4(Methylthio), N6(Deamidated), K12(iTRAQ4plex)                                                  | 1572.80034 | 69 | 3.38 | Expt1 |
| GESVMVPTLSEEEAK            | 6 | 6671549                                 | N-Term(iTRAQ4plex), K16(iTRAQ4plex)                                                                                  | 1993.04521 | 69 | 3.89 | Expt1 |
| VSVELTNSLFK                | 5 | 28395018                                | N-Term(iTRAQ4plex), K11(iTRAQ4plex)                                                                                  | 1524.89470 | 69 | 3.15 | Expt1 |
| AAELGTLAETEAR              | 2 | 6680606                                 | N-Term(iTRAQ4plex)                                                                                                   | 1475.78398 | 69 | 3.59 | Expt1 |
| LGAGYPMGPFELLDYVGLDTTK     | 2 | 111038118                               | N-Term(iTRAQ4plex), M7(Oxidation), K22(iTRAQ4plex)                                                                   | 2661.37809 | 69 | 3.60 | Expt1 |
| NFATSLYSVIK                | 7 | 6753060                                 | N-Term(iTRAQ4plex), M9(Oxidation), K11(iTRAQ4plex)                                                                   | 1578.84966 | 69 | 3.22 | Expt1 |
| LLESEAVNENLR               | 4 | 157823695;157823731;157823795;157823761 | N-Term(iTRAQ4plex)                                                                                                   | 1530.82732 | 69 | 3.68 | Expt1 |
| LIEFSSFK                   | 2 | 31541826                                | N-Term(iTRAQ4plex), K10(iTRAQ4plex)                                                                                  | 1499.87602 | 68 | 2.89 | Expt1 |
| ISVYYNEATGGK               | 2 | 7106439                                 | N-Term(iTRAQ4plex), K12(iTRAQ4plex)                                                                                  | 1589.84453 | 68 | 4.64 | Expt1 |
| VTGAVDVTLGAVQNSVDK         | 2 | 13385312                                | N-Term(iTRAQ4plex), K18(iTRAQ4plex)                                                                                  | 2061.15433 | 68 | 3.36 | Expt1 |
| QPEGTMIDEFTVAR             | 3 | 61657921                                | N-Term(iTRAQ4plex)                                                                                                   | 1923.92229 | 68 | 3.15 | Expt1 |
| EFNEDGALAVLQFK             | 5 | 114145493;29788787                      | N-Term(iTRAQ4plex), K15(iTRAQ4plex)                                                                                  | 1997.06377 | 68 | 3.93 | Expt1 |
| TLENTAITGR                 | 2 | 115385968;115385966                     | N-Term(iTRAQ4plex)                                                                                                   | 1445.84795 | 68 | 3.45 | Expt1 |
| EVWEELDLDPNR               | 2 | 6679158;254750698                       | N-Term(iTRAQ4plex)                                                                                                   | 1715.84038 | 68 | 2.83 | Expt1 |
| AELFTQSCADLDK              | 2 | 117938332;117938334                     | N-Term(iTRAQ4plex), C8(Methylthio), K13(iTRAQ4plex)                                                                  | 1774.86333 | 68 | 3.58 | Expt1 |
| LDILDTAGVEFGAMR            | 3 | 165972315;6677819                       | N-Term(iTRAQ4plex), M15(Oxidation)                                                                                   | 1925.94170 | 68 | 4.16 | Expt1 |
| MPTTQETDGFQVK              | 2 | 194328771;194328773                     | N-Term(iTRAQ4plex), K13(iTRAQ4plex)                                                                                  | 1769.89983 | 68 | 2.82 | Expt1 |
| LISLTDENALAGNEELTVK        | 2 | 6755863                                 | N-Term(iTRAQ4plex), N13(Deamidated), K19(iTRAQ4plex)                                                                 | 2319.27793 | 68 | 4.81 | Expt1 |
| QEPLGSDSEGVNCLAYDEAIMAQDDR | 6 | 149270309                               | N-Term(iTRAQ4plex), C13(Methylthio)                                                                                  | 3029.35013 | 68 | 4.24 | Expt1 |
| QAAPCVLFFDELDSIAK          | 2 | 225543319                               | N-Term(iTRAQ4plex), C5(Methylthio), K17(iTRAQ4plex)                                                                  | 2201.13205 | 68 | 3.11 | Expt1 |
| GMVSLSEIEALAK              | 2 | 148747189                               | N-Term(iTRAQ4plex), K14(iTRAQ4plex)                                                                                  | 1764.97556 | 68 | 4.13 | Expt1 |
| LAADVATMNOVLASR            | 5 | 58037267                                | N-Term(iTRAQ4plex), M8(Oxidation)                                                                                    | 1719.91971 | 68 | 2.99 | Expt1 |
| IINDYPEEDGK                | 2 | 29789343                                | N-Term(iTRAQ4plex), K12(iTRAQ4plex)                                                                                  | 1743.87468 | 68 | 3.38 | Expt1 |
| NDSPCGTTIGPILASR           | 3 | 161016822;161016820                     | N-Term(iTRAQ4plex), C5(Methylthio)                                                                                   | 1791.89165 | 68 | 2.86 | Expt1 |
| LVFLGLDNAGK                | 2 | 21313476;21703344                       | N-Term(iTRAQ4plex), K11(iTRAQ4plex)                                                                                  | 1434.86467 | 68 |      | Expt1 |
| DQDNMQAELNR                | 2 | 61657921                                | N-Term(iTRAQ4plex)                                                                                                   | 1477.68474 | 68 | 3.93 | Expt1 |
| EIQEPDPTYEEK               | 2 | 40254124                                | N-Term(iTRAQ4plex), K12(iTRAQ4plex)                                                                                  | 1765.87920 | 68 | 3.78 | Expt1 |
| STPEDQILYQTER              | 4 | 188497650                               | N-Term(iTRAQ4plex)                                                                                                   | 1723.86235 | 68 | 3.71 | Expt1 |
| EEEIPETISFEMLDAAK          | 4 | 21312546                                | N-Term(iTRAQ4plex), K17(iTRAQ4plex)                                                                                  | 2240.11924 | 68 | 4.25 | Expt1 |
| IASNAGSIA                  | 7 | 12584986;149272300                      | N-Term(iTRAQ4plex)                                                                                                   | 947.52843  | 68 |      | Expt1 |
| FGPYTPEVIAGLDPK            | 2 | 6755202                                 | N-Term(iTRAQ4plex), K16(iTRAQ4plex)                                                                                  | 2055.10820 | 68 | 3.53 | Expt1 |
| EAGVNGTSPAPVR              | 2 | 21312256                                | N-Term(iTRAQ4plex), N6(Deamidated)                                                                                   | 1359.69890 | 68 | 2.92 | Expt1 |
| MSATFIGNSTAIQELFK          | 4 | 33859488;22165384;21746161              | N-Term(iTRAQ4plex), K17(iTRAQ4plex)                                                                                  | 2146.15226 | 68 | 3.95 | Expt1 |
| MASTFIGNSTAIQELFK          | 4 | 27754056                                | N-Term(iTRAQ4plex), K17(iTRAQ4plex)                                                                                  | 2146.15226 | 68 | 3.95 | Expt1 |
| MAATFIGNSTAIQELFK          | 4 | 31981939                                | N-Term(iTRAQ4plex), M1(Oxidation), K17(iTRAQ4plex)                                                                   | 2146.15226 | 68 | 2.99 | Expt1 |
| EINLSPDSSSVIVSGLMVATK      | 2 | 46849812                                | N-Term(iTRAQ4plex), M17(Oxidation), K21(iTRAQ4plex)                                                                  | 2451.33396 | 68 | 2.84 | Expt1 |
| GVDIVMDPLGGSDTAK           | 3 | 33859662                                | N-Term(iTRAQ4plex), M6(Oxidation), K16(iTRAQ4plex)                                                                   | 1878.97734 | 68 | 3.86 | Expt1 |
| DAQLAGSPELLEFLGTR          | 5 | 160948577                               | N-Term(iTRAQ4plex)                                                                                                   | 1961.04973 | 68 | 3.60 | Expt1 |

|                           |   |                                                                                                                                                                                                                                                                                                                                                                                                                                                       |                                                                   |            |    |      |       |
|---------------------------|---|-------------------------------------------------------------------------------------------------------------------------------------------------------------------------------------------------------------------------------------------------------------------------------------------------------------------------------------------------------------------------------------------------------------------------------------------------------|-------------------------------------------------------------------|------------|----|------|-------|
| GDVDLALPNVEGDLK           | 4 | 61743961                                                                                                                                                                                                                                                                                                                                                                                                                                              | N-Term(iTRAQ4plex), K15(iTRAQ4plex)                               | 1843.01457 | 68 | 3.29 | Expt1 |
| VIDFDENTALDDTEEGSFR       | 3 | 114205428                                                                                                                                                                                                                                                                                                                                                                                                                                             | N-Term(iTRAQ4plex)                                                | 2317.06510 | 68 | 4.01 | Expt1 |
| ETVGDLEAMNEMNDELQENAR     | 2 | 118601017                                                                                                                                                                                                                                                                                                                                                                                                                                             | N-Term(iTRAQ4plex)                                                | 2552.13384 | 68 | 3.03 | Expt1 |
| MAVTFIGNSTAIQELFK         | 2 | 7106439                                                                                                                                                                                                                                                                                                                                                                                                                                               | N-Term(iTRAQ4plex), K17(iTRAQ4plex)                               | 2158.18613 | 67 | 2.93 | Expt1 |
| TVNLLNWDTAGQEEYDR         | 2 | 9625037                                                                                                                                                                                                                                                                                                                                                                                                                                               | N-Term(iTRAQ4plex)                                                | 2168.03862 | 67 | 3.74 | Expt1 |
| VNFLPEIITLSK              | 7 | 134288917                                                                                                                                                                                                                                                                                                                                                                                                                                             | N-Term(iTRAQ4plex), K12(iTRAQ4plex)                               | 1662.01482 | 67 | 2.97 | Expt1 |
| GFPGYMYTDLATIVER          | 1 | 19527064;19705578                                                                                                                                                                                                                                                                                                                                                                                                                                     | N-Term(iTRAQ4plex), M6(Oxidation)                                 | 2056.98686 | 67 |      | Expt1 |
| AISFVGSNQAGEYIFER         | 2 | 19527258                                                                                                                                                                                                                                                                                                                                                                                                                                              | N-Term(iTRAQ4plex)                                                | 2032.02861 | 67 | 4.11 | Expt1 |
| LQVEPAVDTSVQCYGPGIEGQGVFR | 4 | 125347376                                                                                                                                                                                                                                                                                                                                                                                                                                             | N-Term(iTRAQ4plex), C14(Methylthio)                               | 2896.41465 | 67 | 4.29 | Expt1 |
| EASDPQPEDVDGGLK           | 2 | 149234244;161086971                                                                                                                                                                                                                                                                                                                                                                                                                                   | N-Term(iTRAQ4plex), K15(iTRAQ4plex)                               | 1844.91704 | 67 | 3.41 | Expt1 |
| TYGCGECPDAMYVK            | 4 | 149249090                                                                                                                                                                                                                                                                                                                                                                                                                                             | N-Term(iTRAQ4plex), C5(Methylthio), K14(iTRAQ4plex)               | 1824.82097 | 67 | 4.68 | Expt1 |
| TPFGAYGGLLK               | 2 | 29126205                                                                                                                                                                                                                                                                                                                                                                                                                                              | N-Term(iTRAQ4plex), K11(iTRAQ4plex)                               | 1411.83000 | 67 | 3.82 | Expt1 |
| LEASITEYA                 | 2 | 6755911                                                                                                                                                                                                                                                                                                                                                                                                                                               | N-Term(iTRAQ4plex)                                                | 1140.59270 | 67 |      | Expt1 |
| FALGLSGGLVSMMLAR          | 1 | 13384778                                                                                                                                                                                                                                                                                                                                                                                                                                              | N-Term(iTRAQ4plex), M13(Oxidation)                                | 1738.96689 | 67 |      | Expt1 |
| LMNDFSSALNNFQVVQR         | 1 | 19527102                                                                                                                                                                                                                                                                                                                                                                                                                                              | N-Term(iTRAQ4plex)                                                | 2127.08310 | 67 |      | Expt1 |
| AGAGSATLSMAYAGAR          | 4 | 31982186                                                                                                                                                                                                                                                                                                                                                                                                                                              | N-Term(iTRAQ4plex), M10(Oxidation)                                | 1614.80474 | 67 | 3.58 | Expt1 |
| EELQLLQEQGSYVGEVVR        | 2 | 7110703                                                                                                                                                                                                                                                                                                                                                                                                                                               | N-Term(iTRAQ4plex)                                                | 2220.17264 | 67 | 4.66 | Expt1 |
| AMTTGAIAAMLSTILYSR        | 2 | 7242197                                                                                                                                                                                                                                                                                                                                                                                                                                               | N-Term(iTRAQ4plex), M2(Oxidation), M10(Oxidation)                 | 2047.07224 | 67 | 3.66 | Expt1 |
| TYVTAPGTGFLPGDTAR         | 6 | 84662768                                                                                                                                                                                                                                                                                                                                                                                                                                              | N-Term(iTRAQ4plex)                                                | 1867.97344 | 66 | 3.69 | Expt1 |
| AGYFGDPLAPNPADK           | 3 | 110624798                                                                                                                                                                                                                                                                                                                                                                                                                                             | N-Term(iTRAQ4plex), K15(iTRAQ4plex)                               | 1820.94170 | 66 | 3.62 | Expt1 |
| VLTDIPTFEK                | 2 | 226823359                                                                                                                                                                                                                                                                                                                                                                                                                                             | N-Term(iTRAQ4plex), K10(iTRAQ4plex)                               | 1450.83818 | 66 | 3.12 | Expt1 |
| AFDSGIIMEFVNK             | 5 | 29293809                                                                                                                                                                                                                                                                                                                                                                                                                                              | N-Term(iTRAQ4plex), K14(iTRAQ4plex)                               | 1855.99443 | 66 | 4.26 | Expt1 |
| YSPPPVGSVSAPNLPTEAENLEYVR | 2 | 31542421                                                                                                                                                                                                                                                                                                                                                                                                                                              | N-Term(iTRAQ4plex)                                                | 2830.44925 | 66 | 4.08 | Expt1 |
| YVQLPADEVDTQLLQDAAR       | 2 | 158533995;13994221                                                                                                                                                                                                                                                                                                                                                                                                                                    | N-Term(iTRAQ4plex)                                                | 2289.19388 | 66 | 3.87 | Expt1 |
| SEQDQAENEGEDSAVLMER       | 2 | 149258001;22203755                                                                                                                                                                                                                                                                                                                                                                                                                                    | N-Term(iTRAQ4plex)                                                | 2281.00249 | 66 | 3.06 | Expt1 |
| DIEIIDEK                  | 2 | 110625954                                                                                                                                                                                                                                                                                                                                                                                                                                             | N-Term(iTRAQ4plex), K10(iTRAQ4plex)                               | 1504.83989 | 66 | 3.84 | Expt1 |
| EDLNCQEEEDPMNK            | 2 | 31980808                                                                                                                                                                                                                                                                                                                                                                                                                                              | N-Term(iTRAQ4plex), C5(Methylthio), K14(iTRAQ4plex)               | 2027.85893 | 66 | 3.57 | Expt1 |
| GMVFGIPDGLVLELVPQR        | 4 | 149253040;183979966                                                                                                                                                                                                                                                                                                                                                                                                                                   | N-Term(iTRAQ4plex), M2(Oxidation)                                 | 1987.08323 | 66 | 4.13 | Expt1 |
| NIIVFYSQTGTAEFFANR        | 2 | 6679421                                                                                                                                                                                                                                                                                                                                                                                                                                               | N-Term(iTRAQ4plex)                                                | 2261.13663 | 66 | 4.09 | Expt1 |
| VVSAMVNCNDDQGVLLGR        | 4 | 6678329                                                                                                                                                                                                                                                                                                                                                                                                                                               | N-Term(iTRAQ4plex), M5(Oxidation), C8(Methylthio)                 | 2096.00919 | 66 | 3.81 | Expt1 |
| TLQIFNIEMK                | 4 | 51491845                                                                                                                                                                                                                                                                                                                                                                                                                                              | N-Term(iTRAQ4plex), K10(iTRAQ4plex)                               | 1524.87810 | 66 | 3.42 | Expt1 |
| VVDLMAYMASK               | 1 | 149248895;149249564;149249566;149251040;149251044;149251140;149251223;149251463;149251509;149251903;149251905;149251911;149251964;149251966;149252413;149253819;149253823;149257623;149258744;149258770;149258772;149258934;149258938;149259607;149259652;149259964;149260709;149260711;94387946;149260748;149263021;149265154;149265922;149266302;149266427;149266431;149268472;149268967;149270469;149270673;149272161;94408118;149273204;149275059 | N-Term(iTRAQ4plex), M5(Oxidation), M8(Oxidation), K11(iTRAQ4plex) | 1547.81401 | 66 |      | Expt1 |
| VVPCLVAPVAGR              | 4 | 145966915                                                                                                                                                                                                                                                                                                                                                                                                                                             | N-Term(iTRAQ4plex), C4(Methylthio)                                | 1370.77825 | 66 | 3.45 | Expt1 |
| IPSFPPDLGPPER             | 1 | 13385322                                                                                                                                                                                                                                                                                                                                                                                                                                              | N-Term(iTRAQ4plex)                                                | 1615.86492 | 66 |      | Expt1 |
| LEQQVPVNQVFGQDEMDIVIGVTK  | 6 | 149252852;149255712;149255716;94404874;149270989;149270993;149271090;149271094                                                                                                                                                                                                                                                                                                                                                                        | N-Term(iTRAQ4plex), K24(iTRAQ4plex)                               | 2974.58713 | 66 | 5.09 | Expt1 |
| SLSALGNVISALAEGSTYVYR     | 2 | 61657921                                                                                                                                                                                                                                                                                                                                                                                                                                              | N-Term(iTRAQ4plex)                                                | 2412.29203 | 66 | 3.96 | Expt1 |
| EEDATLSSPAVVMPTMGR        | 2 | 19527258                                                                                                                                                                                                                                                                                                                                                                                                                                              | N-Term(iTRAQ4plex)                                                | 2034.99443 | 66 | 4.17 | Expt1 |
| SDFDMVDYLNELR             | 4 | 88014720                                                                                                                                                                                                                                                                                                                                                                                                                                              | N-Term(iTRAQ4plex)                                                | 1760.83269 | 66 | 4.07 | Expt1 |
| NPFGNVGLLMGEAGK           | 3 | 23956084                                                                                                                                                                                                                                                                                                                                                                                                                                              | N-Term(iTRAQ4plex), K15(iTRAQ4plex)                               | 1791.97759 | 66 | 3.71 | Expt1 |

|                                |    |                                         |                                                                    |            |    |      |       |
|--------------------------------|----|-----------------------------------------|--------------------------------------------------------------------|------------|----|------|-------|
| LQNLDALTNLTVLSVQSNR            | 4  | 12963569                                | N-Term(iTRAQ4plex)                                                 | 2243.25290 | 66 | 3.56 | Expt1 |
| TSACGLFVVCYPR                  | 2  | 77539776;77539770;8394027               | N-Term(iTRAQ4plex), C4(Methylthio), C10(Methylthio)                | 1639.72771 | 66 | 3.46 | Expt1 |
| GTAYFTFFPGNLK                  | 2  | 40068493;93587673;40068489              | N-Term(iTRAQ4plex), K13(iTRAQ4plex)                                | 1704.92217 | 66 | 3.86 | Expt1 |
| VVFSESVQVEK                    | 1  | 112421039                               | N-Term(iTRAQ4plex), K11(iTRAQ4plex)                                | 1538.86833 | 66 |      | Expt1 |
| SGGNLEVMGLMLGK                 | 2  | 7304971                                 | N-Term(iTRAQ4plex), K14(iTRAQ4plex)                                | 1693.92803 | 66 | 3.50 | Expt1 |
| LTADILTTCAADIQR                | 2  | 40018610                                | N-Term(iTRAQ4plex), C10(Methylthio)                                | 1908.00748 | 66 | 3.10 | Expt1 |
| VDQLTAQLADLAAR                 | 8  | 31543942                                | N-Term(iTRAQ4plex)                                                 | 1628.91374 | 66 | 3.98 | Expt1 |
| ATTLNVAVSSLASTGLSLTK           | 6  | 32567788                                | N-Term(iTRAQ4plex), K20(iTRAQ4plex)                                | 2210.26004 | 66 | 4.24 | Expt1 |
| IMEGPAFNFLDPAVR                | 2  | 18152793                                | N-Term(iTRAQ4plex), M2(Oxidation)                                  | 1907.98552 | 66 | 2.96 | Expt1 |
| SVDEIR                         | 7  | 94400195;149267887;6754976              | N-Term(iTRAQ4plex)                                                 | 975.55737  | 65 | 3.09 | Expt1 |
| ELDDISQEIQLQR                  | 2  | 170784836;170784834                     | N-Term(iTRAQ4plex)                                                 | 1801.94365 | 65 | 3.22 | Expt1 |
| TETTGATGQASSLLSGR              | 1  | 40789282;158508560                      | N-Term(iTRAQ4plex)                                                 | 1780.91692 | 65 |      | Expt1 |
| VDQSAVGFYQGK                   | 2  | 75677414                                | N-Term(iTRAQ4plex), K13(iTRAQ4plex)                                | 1715.88603 | 65 | 4.30 | Expt1 |
| DQVLQNLGSVESYSEEK              | 2  | 157823695;157823731;157823795;157823761 | N-Term(iTRAQ4plex), K17(iTRAQ4plex)                                | 2213.12564 | 65 | 4.57 | Expt1 |
| AAECNIVVTQPR                   | 2  | 150456419                               | N-Term(iTRAQ4plex), C4(Methylthio)                                 | 1490.75847 | 65 | 4.30 | Expt1 |
| SIPDTPVPTYQDPLYLEDQVPR         | 5  | 30725847                                | N-Term(iTRAQ4plex)                                                 | 2687.37998 | 65 | 3.61 | Expt1 |
| MLFYSFFK                       | 1  | 158533995                               | N-Term(iTRAQ4plex), K8(iTRAQ4plex)                                 | 1370.74932 | 65 |      | Expt1 |
| EVSDGIVAPGYEEALK               | 4  | 149234067                               | N-Term(iTRAQ4plex), K17(iTRAQ4plex)                                | 2094.08696 | 65 | 4.20 | Expt1 |
| LEGDNVNPESQLIQNEQSESEK         | 2  | 115511018                               | N-Term(iTRAQ4plex), K23(iTRAQ4plex)                                | 2903.40873 | 65 | 4.20 | Expt1 |
| FSSGGACGGYGGYGGSSFFGGGLGSGFGGR | 2  | 21489935                                | N-Term(iTRAQ4plex), C7(Methylthio)                                 | 3068.34134 | 65 | 3.30 | Expt1 |
| GLMSNGMSQLIGIK                 | 2  | 9790161                                 | N-Term(iTRAQ4plex), N5(Deamidated), M7(Oxidation), K14(iTRAQ4plex) | 1753.95842 | 65 | 3.04 | Expt1 |
| TQFPTLDIEVDGGVGPDTVQK          | 2  | 27532955                                | N-Term(iTRAQ4plex), K21(iTRAQ4plex)                                | 2504.32669 | 65 | 3.70 | Expt1 |
| VAEFTTNLMEEEEK                 | 6  | 114326446                               | N-Term(iTRAQ4plex), M9(Oxidation), K14(iTRAQ4plex)                 | 1973.96196 | 65 | 3.67 | Expt1 |
| WLPLEANPEVTNQFLK               | 2  | 15809026;139948802                      | N-Term(iTRAQ4plex), K16(iTRAQ4plex)                                | 2187.21318 | 65 | 3.69 | Expt1 |
| TFEGVDPQNTSMR                  | 5  | 33859560                                | N-Term(iTRAQ4plex)                                                 | 1625.76872 | 65 | 3.40 | Expt1 |
| LTECLETILNK                    | 2  | 163644277                               | N-Term(iTRAQ4plex), C4(Methylthio), K11(iTRAQ4plex)                | 1610.87700 | 65 | 4.12 | Expt1 |
| YNPNVLPVQCTGK                  | 2  | 6753138                                 | N-Term(iTRAQ4plex), C10(Methylthio), K13(iTRAQ4plex)               | 1766.92180 | 65 | 3.44 | Expt1 |
| ILFEVFDENR                     | 14 | 56699423;167466245                      | N-Term(iTRAQ4plex)                                                 | 1425.75347 | 65 | 3.65 | Expt1 |
| DESSPYAAMLAQDVAQR              | 1  | 31981100                                | N-Term(iTRAQ4plex), M9(Oxidation)                                  | 2082.99150 | 65 |      | Expt1 |
| FGSCQGGVAATFTK                 | 2  | 31982236                                | N-Term(iTRAQ4plex), C4(Methylthio), K14(iTRAQ4plex)                | 1778.88994 | 65 | 3.58 | Expt1 |
| NGGQILIADLR                    | 4  | 29150272                                | N-Term(iTRAQ4plex), N1(Deamidated)                                 | 1314.75115 | 65 | 3.87 | Expt1 |
| ASLLVDEEDVDAMDQR               | 2  | 39930413                                | N-Term(iTRAQ4plex)                                                 | 1949.93291 | 65 | 3.70 | Expt1 |
| LTLDTIFVPNTGK                  | 6  | 6755967                                 | N-Term(iTRAQ4plex), K13(iTRAQ4plex)                                | 1707.00212 | 65 | 3.69 | Expt1 |
| AVGDGILCNTYIDSYK               | 4  | 110625656;270309161                     | N-Term(iTRAQ4plex), C8(Methylthio), K16(iTRAQ4plex)                | 2066.01798 | 65 | 3.41 | Expt1 |
| AIASNIMYIVGQYPR                | 5  | 38604071                                | N-Term(iTRAQ4plex)                                                 | 1953.07834 | 65 | 4.42 | Expt1 |
| DMAGLYEEIWK                    | 2  | 33469047                                | N-Term(iTRAQ4plex), M2(Oxidation), K11(iTRAQ4plex)                 | 1658.83672 | 65 |      | Expt1 |
| FNVVPSLESK                     | 2  | 149270448;82998332                      | N-Term(iTRAQ4plex), K10(iTRAQ4plex)                                | 1407.80669 | 65 | 2.86 | Expt1 |
| DVSELTGFPEMLGGR                | 6  | 149234067                               | N-Term(iTRAQ4plex), M11(Oxidation)                                 | 1767.87554 | 65 | 3.87 | Expt1 |
| DLTSTFNILLK                    | 2  | 55926127;117938332;117938334            | N-Term(iTRAQ4plex), K10(iTRAQ4plex)                                | 1403.87859 | 65 | 3.89 | Expt1 |
| EISDGDVIISGNR                  | 4  | 46560582;6681283                        | N-Term(iTRAQ4plex)                                                 | 1518.79277 | 65 | 3.59 | Expt1 |
| LLYPVAPPEPVEDR                 | 3  | 164663773                               | N-Term(iTRAQ4plex)                                                 | 1738.95329 | 65 | 3.24 | Expt1 |
| TPVLFDVYIEIK                   | 4  | 160707921                               | N-Term(iTRAQ4plex), K11(iTRAQ4plex)                                | 1611.93328 | 65 | 3.44 | Expt1 |
| QPQPPPPPPATAQPPPGAPR           | 2  | 169646306                               | N-Term(iTRAQ4plex)                                                 | 2239.21469 | 65 | 4.30 | Expt1 |
| QTNPSAMEVEEDDPVPEIR            | 4  | 225543319;94408011                      | N-Term(iTRAQ4plex), M7(Oxidation)                                  | 2316.08127 | 65 | 3.97 | Expt1 |
| YVLSYLGLLSQEK                  | 3  | 23943828                                | N-Term(iTRAQ4plex), K14(iTRAQ4plex)                                | 1900.10886 | 64 | 4.65 | Expt1 |
| SPSAQLMEQVAQLK                 | 2  | 118601017                               | N-Term(iTRAQ4plex), K14(iTRAQ4plex)                                | 1818.00640 | 64 | 3.34 | Expt1 |
| IIVYNQPYTYGEEK                 | 2  | 28570174                                | N-Term(iTRAQ4plex), K13(iTRAQ4plex)                                | 1876.00981 | 64 | 2.96 | Expt1 |
| ILFDGIPEK                      | 2  | 148540106                               | N-Term(iTRAQ4plex), K10(iTRAQ4plex)                                | 1432.86833 | 64 | 3.10 | Expt1 |
| TSGELFAQAPVDQFPGTAVESVTDSSR    | 4  | 13384758                                | N-Term(iTRAQ4plex)                                                 | 2940.44126 | 64 | 5.45 | Expt1 |
| DPENFPFVVLGNK                  | 7  | 148747526                               | N-Term(iTRAQ4plex), K13(iTRAQ4plex)                                | 1763.96611 | 64 | 3.15 | Expt1 |
| MIVVLGEIGGTEEYK                | 5  | 29293809                                | N-Term(iTRAQ4plex), K15(iTRAQ4plex)                                | 1926.05600 | 64 | 3.77 | Expt1 |
| LVYQITTPPGSVSDPSQLNLYVR        | 6  | 33469047                                | N-Term(iTRAQ4plex)                                                 | 2691.45792 | 64 | 5.05 | Expt1 |



|                             |    |                                        |                                                                                       |            |    |      |       |
|-----------------------------|----|----------------------------------------|---------------------------------------------------------------------------------------|------------|----|------|-------|
| VCTTAGGVVTLPSDDTPSGPR       | 4  | 115647999                              | N-Term(iTRAQ4plex), C2(Methylthio)                                                    | 2317.13230 | 64 | 4.40 | Expt1 |
| DFIIFEAAPQETR               | 2  | 9790175                                | N-Term(iTRAQ4plex)                                                                    | 1680.87517 | 64 | 3.84 | Expt1 |
| GIPTNLFQLQDEDEDELAKG        | 1  | 6755997                                | N-Term(iTRAQ4plex), K22(iTRAQ4plex)                                                   | 2749.37033 | 64 |      | Expt1 |
| QLEVYTSGGDPESVAGEYGR        | 2  | 51093840                               | N-Term(iTRAQ4plex)                                                                    | 2258.06865 | 64 | 3.04 | Expt1 |
| NPSLLGILYVK                 | 2  | 2729278                                | N-Term(iTRAQ4plex), K11(iTRAQ4plex)                                                   | 1462.88664 | 64 | 3.14 | Expt1 |
| DISSAVQANPALTELSLR          | 11 | 31981748;285402638;285402659           | N-Term(iTRAQ4plex)                                                                    | 2029.10501 | 64 | 5.44 | Expt1 |
| FSPLMTAEGLGTR               | 1  | 88758582;88758584                      | N-Term(iTRAQ4plex)                                                                    | 1523.80608 | 64 |      | Expt1 |
| VLPSITTEILK                 | 1  | 6679299                                | N-Term(iTRAQ4plex), K11(iTRAQ4plex)                                                   | 1501.94853 | 64 |      | Expt1 |
| IQCSFDASGLAPER              | 2  | 86439989                               | N-Term(iTRAQ4plex), C3(Methylthio)                                                    | 1784.84599 | 64 | 2.94 | Expt1 |
| FFQPTEMAQQDFQFR             | 2  | 163644277                              | N-Term(iTRAQ4plex)                                                                    | 2022.95523 | 64 | 3.69 | Expt1 |
| SPVISIEPPSSTVQQGDASF        | 4  | 149253040;183979966                    | N-Term(iTRAQ4plex), K22(iTRAQ4plex)                                                   | 2590.36411 | 64 | 3.14 | Expt1 |
| MISSYVGENAEFER              | 1  | 18266680                               | N-Term(iTRAQ4plex), M1(Oxidation)                                                     | 1791.83599 | 64 |      | Expt1 |
| VAGMDVELTVEER               | 5  | 226874906                              | N-Term(iTRAQ4plex)                                                                    | 1591.81487 | 64 | 3.86 | Expt1 |
| VIAPGSSLPTSLTIPNPR          | 6  | 32129201                               | N-Term(iTRAQ4plex)                                                                    | 1964.13628 | 64 | 4.32 | Expt1 |
| YGGPPPDVSYSGVQPGIGTEVFGK    | 3  | 33859724                               | N-Term(iTRAQ4plex), K25(iTRAQ4plex)                                                   | 2795.44937 | 64 | 4.50 | Expt1 |
| TALALAIQELGSK               | 2  | 9790083                                | N-Term(iTRAQ4plex), K14(iTRAQ4plex)                                                   | 1674.01462 | 64 | 2.86 | Expt1 |
| ASLNGADIYSGCCTLK            | 5  | 183980004                              | N-Term(iTRAQ4plex), N4(Deamidated), C12(Methylthio), C13(Methylthio), K16(iTRAQ4plex) | 1996.90801 | 64 | 3.29 | Expt1 |
| CQCPSPGLQLAPDGR             | 4  | 73088940;71067128                      | N-Term(iTRAQ4plex), C1(Methylthio), C3(Methylthio)                                    | 1777.80205 | 64 | 3.59 | Expt1 |
| ENEFFIVTQTCK                | 2  | 12963497;156231023;156231021           | N-Term(iTRAQ4plex), C11(Methylthio), K12(iTRAQ4plex)                                  | 1792.88848 | 64 |      | Expt1 |
| LQEYFVAAGAGDH               | 3  | 31982664                               | N-Term(iTRAQ4plex)                                                                    | 1608.77995 | 64 | 3.42 | Expt1 |
| AACLESAQEPAGAWSNK           | 2  | 19527028                               | N-Term(iTRAQ4plex), C3(Methylthio), K17(iTRAQ4plex)                                   | 2066.98808 | 64 | 3.18 | Expt1 |
| GSEVNVIGIGTSVVTCPK          | 4  | 31982089                               | N-Term(iTRAQ4plex), C16(Methylthio), K18(iTRAQ4plex)                                  | 2094.12687 | 64 | 3.44 | Expt1 |
| TGTAEMSSILEER               | 2  | 6680748                                | N-Term(iTRAQ4plex), M6(Oxidation)                                                     | 1583.77373 | 64 |      | Expt1 |
| TVEVLEPEVTK                 | 2  | 164698474;84370256;25854719            | N-Term(iTRAQ4plex), K11(iTRAQ4plex)                                                   | 1531.88530 | 64 | 3.11 | Expt1 |
| QTYFLPVLGLVDAEK             | 4  | 228008337                              | N-Term(iTRAQ4plex), K15(iTRAQ4plex)                                                   | 1981.12956 | 64 | 3.64 | Expt1 |
| ILYENPNFTGK                 | 2  | 6681035                                | N-Term(iTRAQ4plex), K12(iTRAQ4plex)                                                   | 1696.96050 | 64 | 3.42 | Expt1 |
| MGLVDQLVEPLGPGIK            | 4  | 33859811                               | N-Term(iTRAQ4plex), K16(iTRAQ4plex)                                                   | 1954.13652 | 64 | 3.27 | Expt1 |
| DLSPQDQFNLFESGEANQWK        | 2  | 226531047;226531069                    | N-Term(iTRAQ4plex), K21(iTRAQ4plex)                                                   | 2754.37607 | 64 | 4.39 | Expt1 |
| NVPQEDICEDSDIDGDIR          | 3  | 6680598                                | N-Term(iTRAQ4plex), C8(Methylthio)                                                    | 2272.94536 | 64 | 2.87 | Expt1 |
| ELILSSEPSPAVTPVTPTTLIAPR    | 6  | 13385878                               | N-Term(iTRAQ4plex)                                                                    | 2633.49643 | 64 | 4.13 | Expt1 |
| TLVLPALPLSSADK              | 4  | 23346525                               | N-Term(iTRAQ4plex), K14(iTRAQ4plex)                                                   | 1713.05034 | 64 | 3.68 | Expt1 |
| VFEEDALSWEDEK               | 2  | 134288917                              | N-Term(iTRAQ4plex), K12(iTRAQ4plex)                                                   | 1755.87407 | 64 | 3.43 | Expt1 |
| NQDATVYVGGLEDK              | 2  | 94398719;23346437                      | N-Term(iTRAQ4plex), K14(iTRAQ4plex)                                                   | 1796.93596 | 64 | 2.84 | Expt1 |
| GISLNMEQWSQLK               | 2  | 6755364                                | N-Term(iTRAQ4plex), K13(iTRAQ4plex)                                                   | 1821.98699 | 64 | 4.10 | Expt1 |
| EFSSQLAGQVNVEMDAAPGVDLTR    | 1  | 226823220                              | N-Term(iTRAQ4plex), M14(Oxidation)                                                    | 2694.32500 | 63 |      | Expt1 |
| GQVPCTVTTASPLDDAVLSELK      | 4  | 51766932                               | N-Term(iTRAQ4plex), Q2(Deamidated), C5(Methylthio), K22(iTRAQ4plex)                   | 2579.31754 | 63 | 3.95 | Expt1 |
| DFIDCFLTK                   | 4  | 124001560                              | N-Term(iTRAQ4plex), C5(Methylthio), K9(iTRAQ4plex)                                    | 1435.72319 | 63 | 3.26 | Expt1 |
| VVSLDENFHPNLIELLYIQDSK      | 3  | 148277039                              | N-Term(iTRAQ4plex), K24(iTRAQ4plex)                                                   | 3084.69431 | 63 | 5.76 | Expt1 |
| VIDVFAMPQSGTGVSVVEAVDPVFAQK | 2  | 145966883                              | N-Term(iTRAQ4plex), K26(iTRAQ4plex)                                                   | 2979.58170 | 63 | 3.84 | Expt1 |
| SPLVMDVLNIQGVQR             | 8  | 134288917                              | N-Term(iTRAQ4plex)                                                                    | 1813.02361 | 63 | 3.85 | Expt1 |
| ATGVSAEDADPR                | 2  | 194328702;194328706;18700026;194328708 | N-Term(iTRAQ4plex)                                                                    | 1332.65312 | 63 | 2.90 | Expt1 |
| ISMPDVDLNFK                 | 3  | 61743961                               | N-Term(iTRAQ4plex), K11(iTRAQ4plex)                                                   | 1566.85295 | 63 | 3.09 | Expt1 |
| LFVGGDLWSTTQETLR            | 5  | 169790818;169790823;169790820          | N-Term(iTRAQ4plex)                                                                    | 1967.04033 | 63 | 4.09 | Expt1 |
| SPTMAGGLFAVSK               | 2  | 7657112;27370010                       | N-Term(iTRAQ4plex), K13(iTRAQ4plex)                                                   | 1553.86016 | 63 | 3.55 | Expt1 |
| TGSAEDVALEILATR             | 2  | 145864475                              | N-Term(iTRAQ4plex)                                                                    | 1776.95036 | 63 | 3.41 | Expt1 |
| LVVENVDLVTQMR               | 4  | 28395023                               | N-Term(iTRAQ4plex)                                                                    | 1659.92912 | 63 | 3.65 | Expt1 |
| VANEITVN                    | 31 | 160333372                              | N-Term(iTRAQ4plex)                                                                    | 1003.55614 | 63 |      | Expt1 |
| LEAAETLEECALR               | 4  | 13386370                               | N-Term(iTRAQ4plex), C10(Methylthio)                                                   | 1637.80266 | 63 | 3.91 | Expt1 |
| IPTQPNAPFPNFMQTIQTTVDR      | 2  | 226423935                              | N-Term(iTRAQ4plex)                                                                    | 2660.37595 | 63 | 4.43 | Expt1 |
| ILQDGGQLQVVEK               | 2  | 52353955                               | N-Term(iTRAQ4plex), K12(iTRAQ4plex)                                                   | 1586.94280 | 63 | 4.28 | Expt1 |
| FASENDLPEWK                 | 2  | 153792001                              | N-Term(iTRAQ4plex), K11(iTRAQ4plex)                                                   | 1623.82952 | 63 | 3.97 | Expt1 |

|                                   |   |                                        |                                                                                                    |            |    |      |       |
|-----------------------------------|---|----------------------------------------|----------------------------------------------------------------------------------------------------|------------|----|------|-------|
| QYPISLVLPATR                      | 5 | 25141235;6753620;14861844              | N-Term(iTRAQ4plex)                                                                                 | 1501.88762 | 63 | 3.16 | Expt1 |
| DMILLPEMVGSMVGVYNGK               | 4 | 6677799;94377390                       | N-Term(iTRAQ4plex), M2(Oxidation), M8(Oxidation), M12(Oxidation), N17(Deamidated), K19(iTRAQ4plex) | 2390.19870 | 63 | 3.92 | Expt1 |
| GFEVVYMTPEIDECVQQLK               | 6 | 40556608                               | N-Term(iTRAQ4plex), M7(Oxidation), C15(Methylthio), K20(iTRAQ4plex)                                | 2741.32212 | 63 | 3.44 | Expt1 |
| ILLTEPPMNPTK                      | 4 | 22122825                               | N-Term(iTRAQ4plex), M8(Oxidation), K12(iTRAQ4plex)                                                 | 1657.94475 | 63 | 3.17 | Expt1 |
| QVPNESFFNFSSPLK                   | 1 | 6679012                                | N-Term(iTRAQ4plex), K15(iTRAQ4plex)                                                                | 2089.10527 | 63 |      | Expt1 |
| VITNANENYEPR                      | 2 | 6753220                                | N-Term(iTRAQ4plex)                                                                                 | 1563.79033 | 63 | 4.10 | Expt1 |
| SVEAAAELSAK                       | 2 | 62460366                               | N-Term(iTRAQ4plex), K11(iTRAQ4plex)                                                                | 1363.78093 | 63 | 3.76 | Expt1 |
| AYVSTLMGVPGR                      | 4 | 225637531                              | N-Term(iTRAQ4plex)                                                                                 | 1394.76177 | 63 | 3.57 | Expt1 |
| LGLQNDLFLSLAR                     | 2 | 68226731                               | N-Term(iTRAQ4plex)                                                                                 | 1490.84807 | 63 | 4.15 | Expt1 |
| FSWAQGTDTLADDEMGLGK               | 2 | 124358950;189458814;124487025;39204553 | N-Term(iTRAQ4plex), K19(iTRAQ4plex)                                                                | 2328.18106 | 63 | 2.95 | Expt1 |
| EQDDLLVLLADQDK                    | 2 | 23956096                               | N-Term(iTRAQ4plex), K15(iTRAQ4plex)                                                                | 2031.09006 | 62 | 3.97 | Expt1 |
| ITLPVDFVTADK                      | 2 | 70778976                               | N-Term(iTRAQ4plex), K12(iTRAQ4plex)                                                                | 1606.93596 | 62 | 3.09 | Expt1 |
| NLAPLVEDVQSK                      | 4 | 110347473                              | N-Term(iTRAQ4plex), K12(iTRAQ4plex)                                                                | 1600.91911 | 62 | 3.52 | Expt1 |
| WSPVASTLPELVQR                    | 4 | 28076935                               | N-Term(iTRAQ4plex)                                                                                 | 1726.96428 | 62 | 3.19 | Expt1 |
| EMMLSIINSSITTK                    | 1 | 6753320                                | N-Term(iTRAQ4plex), K14(iTRAQ4plex)                                                                | 1856.01677 | 62 |      | Expt1 |
| TVSLNNLSADEVTR                    | 1 | 31981600                               | N-Term(iTRAQ4plex)                                                                                 | 1662.88127 | 62 |      | Expt1 |
| YSP EEIAMATVTALR                  | 2 | 60687506                               | N-Term(iTRAQ4plex)                                                                                 | 1795.94254 | 62 | 3.82 | Expt1 |
| GEDVPLTEQTVSQVLQSAK               | 2 | 9789913                                | N-Term(iTRAQ4plex), K19(iTRAQ4plex)                                                                | 2317.25736 | 62 | 3.77 | Expt1 |
| YMTISGFQIEETIDR                   | 4 | 6753060                                | N-Term(iTRAQ4plex), M2(Oxidation)                                                                  | 1962.96099 | 62 | 4.19 | Expt1 |
| LPPSTQAPSVNGVCTD T DSSQPLLEQQR    | 2 | 55926127                               | N-Term(iTRAQ4plex), N11(Deamidated), C14(Methylthio)                                               | 3159.51523 | 62 | 3.08 | Expt1 |
| LQGLSVSTGALEQIR                   | 2 | 226423935                              | N-Term(iTRAQ4plex)                                                                                 | 1715.97690 | 62 | 3.31 | Expt1 |
| EVQLAQIFELSLR                     | 2 | 124486765                              | N-Term(iTRAQ4plex)                                                                                 | 1673.93694 | 62 | 4.18 | Expt1 |
| EELSPASSGNNAVYDFIGR               | 2 | 229608895                              | N-Term(iTRAQ4plex)                                                                                 | 2203.07975 | 62 | 3.80 | Expt1 |
| YEMGNPENLLVVDSR                   | 2 | 169234958;32129201                     | N-Term(iTRAQ4plex), M3(Oxidation)                                                                  | 2009.97405 | 62 |      | Expt1 |
| SISM TTFTEPEVLFQSR                | 4 | 21704138;30039690                      | N-Term(iTRAQ4plex)                                                                                 | 2230.16379 | 62 | 4.62 | Expt1 |
| EPVQQLTQAQVEQMQLK                 | 2 | 6678131                                | N-Term(iTRAQ4plex), K17(iTRAQ4plex)                                                                | 2286.24167 | 62 | 4.45 | Expt1 |
| CDEWIISEGG                        | 2 | 20330802                               | N-Term(iTRAQ4plex), C1(Methylthio), K11(iTRAQ4plex)                                                | 1600.76616 | 62 | 3.50 | Expt1 |
| SENEEFVEVGR                       | 4 | 30794476                               | N-Term(iTRAQ4plex)                                                                                 | 1438.69219 | 62 | 3.87 | Expt1 |
| SISFIPPDGEFELMR                   | 2 | 6753074                                | N-Term(iTRAQ4plex)                                                                                 | 1881.95488 | 62 | 3.36 | Expt1 |
| VMALSLVGDPEQLR                    | 3 | 115647999                              | N-Term(iTRAQ4plex), M2(Oxidation)                                                                  | 1758.95745 | 62 | 2.97 | Expt1 |
| LVVENVDLVTQMR                     | 1 | 28395023                               | N-Term(iTRAQ4plex), M12(Oxidation)                                                                 | 1675.91997 | 62 |      | Expt1 |
| QTSPVYSAMLVLVK                    | 1 | 149261823;164607147                    | N-Term(iTRAQ4plex), M8(Oxidation), K18(iTRAQ4plex)                                                 | 1676.98552 | 62 |      | Expt1 |
| SIQLDGLVWGASK                     | 4 | 56699438;54287684                      | N-Term(iTRAQ4plex), K13(iTRAQ4plex)                                                                | 1661.95072 | 62 | 3.43 | Expt1 |
| GEEPGQDQDPVQLLSGFPR               | 4 | 22122591                               | N-Term(iTRAQ4plex)                                                                                 | 2213.10202 | 62 | 4.31 | Expt1 |
| DGIGDACDEDADGGILNEQDNCVLT H NIDQR | 1 | 6755781                                | N-Term(iTRAQ4plex), C7(Methylthio), C23(Methylthio)                                                | 3666.52285 | 62 |      | Expt1 |
| TLLGDPVPSLSDPASTSSQPGSQSQAR       | 4 | 21704138;30039690                      | N-Term(iTRAQ4plex)                                                                                 | 2827.42234 | 62 | 3.78 | Expt1 |
| VGAIPANALDDGQWSQGLISAAR           | 3 | 227116327                              | N-Term(iTRAQ4plex)                                                                                 | 2454.28745 | 62 | 4.26 | Expt1 |
| YGLAAAVFTK                        | 1 | 6753036                                | N-Term(iTRAQ4plex), K10(iTRAQ4plex)                                                                | 1328.79082 | 61 |      | Expt1 |
| VGNLGLATSFNER                     | 4 | 25141235;6753620;14861844              | N-Term(iTRAQ4plex)                                                                                 | 1668.88616 | 61 | 3.80 | Expt1 |
| QITSYGETPCGLEQYAIK                | 2 | 126723461                              | N-Term(iTRAQ4plex), C9(Methylthio), K18(iTRAQ4plex)                                                | 2335.16672 | 61 | 3.83 | Expt1 |
| LYVGGLPEEQVATVLDR                 | 4 | 42490751                               | N-Term(iTRAQ4plex)                                                                                 | 2003.09067 | 61 | 3.59 | Expt1 |
| IYDDFFQNLGDGVANALDNIDAR           | 2 | 6678483                                | N-Term(iTRAQ4plex)                                                                                 | 2758.31522 | 61 |      | Expt1 |
| VSVNPSYLVPESDYTNVVR               | 2 | 148747377                              | N-Term(iTRAQ4plex)                                                                                 | 2396.22173 | 61 | 3.90 | Expt1 |
| ITISDCGQL                         | 2 | 149257773;6679439                      | N-Term(iTRAQ4plex), C6(Methylthio)                                                                 | 1139.55693 | 61 |      | Expt1 |
| TPDLSVQLPSADLDLK                  | 3 | 149263538                              | N-Term(iTRAQ4plex), K16(iTRAQ4plex)                                                                | 2000.11832 | 61 | 3.36 | Expt1 |
| AQSLES LIYMNTQTDR                 | 2 | 70909345                               | N-Term(iTRAQ4plex)                                                                                 | 2014.00627 | 61 | 4.51 | Expt1 |
| EAVCVLSDDTCSDEK                   | 2 | 225543319;94408011                     | N-Term(iTRAQ4plex), C4(Methylthio), C12(Methylthio), K16(iTRAQ4plex)                               | 2106.93143 | 61 | 3.39 | Expt1 |
| GEELLSPLNLEQAAYAR                 | 5 | 149262184;124494242;124494244          | N-Term(iTRAQ4plex)                                                                                 | 2018.07419 | 61 | 2.91 | Expt1 |
| LYQVEYAFK                         | 7 | 6755198                                | N-Term(iTRAQ4plex), K9(iTRAQ4plex)                                                                 | 1448.81120 | 61 | 3.81 | Expt1 |
| DVLMISLTPK                        | 6 | 149263750                              | N-Term(iTRAQ4plex), K10(iTRAQ4plex)                                                                | 1404.84599 | 61 | 3.69 | Expt1 |
| LYVLEAATDSSPPR                    | 2 | 149260328;254911027                    | N-Term(iTRAQ4plex)                                                                                 | 1662.88738 | 61 | 3.63 | Expt1 |
| GIQVSNNGPCLGSR                    | 4 | 31560705                               | N-Term(iTRAQ4plex), N7(Deamidated), C10(Methylthio)                                                | 1592.76372 | 61 | 3.76 | Expt1 |

|                             |    |                                                                                           |                                                                                    |            |    |      |       |
|-----------------------------|----|-------------------------------------------------------------------------------------------|------------------------------------------------------------------------------------|------------|----|------|-------|
| IPELLSGGSVDSETR             | 1  | 6678101                                                                                   | N-Term(iTRAQ4plex)                                                                 | 1703.89653 | 61 |      | Expt1 |
| MLGAPEEADANEQVGR            | 1  | 31981822                                                                                  | N-Term(iTRAQ4plex)                                                                 | 1831.85723 | 61 |      | Expt1 |
| TASNVEEAFINTAK              | 1  | 10946940                                                                                  | N-Term(iTRAQ4plex), K14(iTRAQ4plex)                                                | 1782.95256 | 61 |      | Expt1 |
| EQAADTEAAQEVTLQLLVER        | 2  | 6671565                                                                                   | N-Term(iTRAQ4plex)                                                                 | 2245.15116 | 61 | 3.87 | Expt1 |
| LVGLEQDQCSQQPSFK            | 2  | 162417980                                                                                 | N-Term(iTRAQ4plex), C9(Methylthio), K16(iTRAQ4plex)                                | 2141.06321 | 61 | 4.16 | Expt1 |
| TVQVPVMPGDPLVDASAVSNYYIQLGR | 2  | 146219835;146219830;146219849;146231979                                                   | N-Term(iTRAQ4plex), M7(Oxidation)                                                  | 3156.61850 | 61 | 4.02 | Expt1 |
| GCADNMTLTVSR                | 3  | 158635992                                                                                 | N-Term(iTRAQ4plex), C2(Methylthio), M6(Oxidation)                                  | 1473.66423 | 61 |      | Expt1 |
| DQYSVIFESGDR                | 2  | 29789343                                                                                  | N-Term(iTRAQ4plex)                                                                 | 1559.74907 | 61 | 4.13 | Expt1 |
| DETEFYLGK                   | 2  | 149245460;149249683;149252067;149256551;149257048;149263341;149263818;149267317;149267376 | N-Term(iTRAQ4plex), K9(iTRAQ4plex)                                                 | 1389.70891 | 61 | 3.79 | Expt1 |
| VFLLGEEVAQYDGYK             | 4  | 18152793                                                                                  | N-Term(iTRAQ4plex), K16(iTRAQ4plex)                                                | 2090.11374 | 61 | 3.54 | Expt1 |
| FFPLEAWQIGK                 | 2  | 6753618                                                                                   | N-Term(iTRAQ4plex), K11(iTRAQ4plex)                                                | 1623.91081 | 61 |      | Expt1 |
| LLQDFFNQK                   | 2  | 50345978;31981690                                                                         | N-Term(iTRAQ4plex), N7(Deamidated), K9(iTRAQ4plex)                                 | 1370.76286 | 61 | 3.04 | Expt1 |
| IDMYADGTQDLMMMAIVAPFK       | 9  | 160298217                                                                                 | N-Term(iTRAQ4plex), M3(Oxidation), M12(Oxidation), M14(Oxidation), K21(iTRAQ4plex) | 2697.29148 | 61 | 4.42 | Expt1 |
| VVLIGDSGVGK                 | 5  | 31980840;6679583                                                                          | N-Term(iTRAQ4plex), K11(iTRAQ4plex)                                                | 1331.82402 | 60 | 3.22 | Expt1 |
| LTLGEVLEEASDTGSGPR          | 3  | 226423935                                                                                 | N-Term(iTRAQ4plex)                                                                 | 2032.03093 | 60 | 3.00 | Expt1 |
| LCTSATESEVTR                | 2  | 46593021                                                                                  | N-Term(iTRAQ4plex), C2(Methylthio)                                                 | 1486.70268 | 60 | 2.97 | Expt1 |
| LFIGGLPNYLNDDQVK            | 2  | 164565377                                                                                 | N-Term(iTRAQ4plex), K16(iTRAQ4plex)                                                | 2094.15470 | 60 | 3.15 | Expt1 |
| DIDITSEPFMIK                | 6  | 61743961                                                                                  | N-Term(iTRAQ4plex), K12(iTRAQ4plex)                                                | 1696.91484 | 60 | 3.43 | Expt1 |
| TIPVSSGITSSALPADYLVINK      | 4  | 110431378                                                                                 | N-Term(iTRAQ4plex), K23(iTRAQ4plex)                                                | 2663.48288 | 60 | 3.84 | Expt1 |
| FILPVNEGK                   | 2  | 23956138                                                                                  | N-Term(iTRAQ4plex), K9(iTRAQ4plex)                                                 | 1304.79302 | 60 | 3.26 | Expt1 |
| DMGEMVTGQQTDAQYMLR          | 5  | 117938332;117938334                                                                       | N-Term(iTRAQ4plex), M2(Oxidation)                                                  | 2381.07291 | 60 | 3.56 | Expt1 |
| VTICDPNPFQK                 | 2  | 33563290;125490373;61098178;67003561                                                      | N-Term(iTRAQ4plex), C3(Methylthio), K12(iTRAQ4plex)                                | 1710.84123 | 60 | 2.95 | Expt1 |
| SGASTATAVTDVPSGNLAGAGEAGK   | 3  | 6753494                                                                                   | N-Term(iTRAQ4plex), K25(iTRAQ4plex)                                                | 2477.27378 | 60 | 4.45 | Expt1 |
| LYQEVEIASVDAFQGR            | 2  | 170784813;170784811                                                                       | N-Term(iTRAQ4plex)                                                                 | 1969.00786 | 60 | 3.06 | Expt1 |
| GYMDLMPFINK                 | 2  | 31543902                                                                                  | N-Term(iTRAQ4plex), K11(iTRAQ4plex)                                                | 1616.85332 | 60 | 3.07 | Expt1 |
| LAGFLDLTEQEFR               | 2  | 51093840                                                                                  | N-Term(iTRAQ4plex)                                                                 | 1682.89043 | 60 | 4.19 | Expt1 |
| LFSVPDFVGDACK               | 5  | 239052674                                                                                 | N-Term(iTRAQ4plex), C12(Methylthio), K13(iTRAQ4plex)                               | 1731.87102 | 60 | 2.97 | Expt1 |
| STETSDFENIESPLNER           | 2  | 48928014                                                                                  | N-Term(iTRAQ4plex)                                                                 | 2111.98442 | 60 | 3.11 | Expt1 |
| LEPTVPEDSGR                 | 2  | 149253040;183979966                                                                       | N-Term(iTRAQ4plex)                                                                 | 1343.69121 | 60 |      | Expt1 |
| QLCDNAGFDATNILNK            | 3  | 238814391                                                                                 | N-Term(iTRAQ4plex), C3(Methylthio), K16(iTRAQ4plex)                                | 2071.02317 | 60 | 4.45 | Expt1 |
| GFVPVAPICTDK                | 2  | 171460960                                                                                 | N-Term(iTRAQ4plex), C9(Methylthio), K12(iTRAQ4plex)                                | 1580.84758 | 60 | 3.23 | Expt1 |
| LFYGDLPMPDQEEELFGPVSLEQVK   | 2  | 114145467                                                                                 | N-Term(iTRAQ4plex), K25(iTRAQ4plex)                                                | 3096.58957 | 60 | 3.99 | Expt1 |
| IANLQTDLSGDLR               | 2  | 125347376                                                                                 | N-Term(iTRAQ4plex)                                                                 | 1559.85478 | 60 | 3.69 | Expt1 |
| GSFTCQCLPGYQK               | 11 | 149261823;164607147                                                                       | N-Term(iTRAQ4plex), C5(Methylthio), C7(Methylthio), K13(iTRAQ4plex)                | 1811.81511 | 60 | 3.43 | Expt1 |
| FTGLQYLR                    | 20 | 160333372                                                                                 | N-Term(iTRAQ4plex)                                                                 | 1141.65112 | 60 | 3.10 | Expt1 |
| GAMGPAGADGQQGSR             | 1  | 226423931                                                                                 | N-Term(iTRAQ4plex)                                                                 | 1503.71416 | 60 |      | Expt1 |
| LAIQFGNYK                   | 2  | 20137008                                                                                  | N-Term(iTRAQ4plex), K9(iTRAQ4plex)                                                 | 1341.78227 | 60 | 3.17 | Expt1 |
| DNTALLTQVQTTMR              | 2  | 28076935                                                                                  | N-Term(iTRAQ4plex)                                                                 | 1735.91667 | 60 | 3.61 | Expt1 |
| FETLEPEMNLAAR               | 6  | 55926127                                                                                  | N-Term(iTRAQ4plex)                                                                 | 1735.88689 | 60 | 4.00 | Expt1 |
| APEGEETEYVSPEDLEAQLQSDER    | 2  | 7949027                                                                                   | N-Term(iTRAQ4plex)                                                                 | 3012.37809 | 60 | 4.46 | Expt1 |
| AEELLAQLGR                  | 5  | 29336026                                                                                  | N-Term(iTRAQ4plex)                                                                 | 1243.71587 | 60 | 2.98 | Expt1 |
| LLSPGSVMLVSAR               | 3  | 160333789                                                                                 | N-Term(iTRAQ4plex)                                                                 | 1473.86150 | 60 | 3.53 | Expt1 |
| ASLEAGAEPETITSLISPEGLAIDHFR | 5  | 84370361                                                                                  | N-Term(iTRAQ4plex)                                                                 | 3138.65110 | 60 | 5.15 | Expt1 |
| TLPGGNQCIVIPICR             | 6  | 118197277;149274894;118136302                                                             | N-Term(iTRAQ4plex), C8(Methylthio), C13(Methylthio)                                | 1706.83574 | 60 | 3.57 | Expt1 |
| FLGDSAAGMAIK                | 2  | 157951706                                                                                 | N-Term(iTRAQ4plex), K12(iTRAQ4plex)                                                | 1468.81499 | 59 | 4.45 | Expt1 |
| LNSNTQVLLSATMPSDVLVTK       | 2  | 21450625;226823309                                                                        | N-Term(iTRAQ4plex), M14(Oxidation), K23(iTRAQ4plex)                                | 2763.51084 | 59 | 4.49 | Expt1 |
| MTLSDPSEMDELMSSEAYEK        | 2  | 13386066                                                                                  | N-Term(iTRAQ4plex), M1(Oxidation), K20(iTRAQ4plex)                                 | 2639.17636 | 59 | 4.09 | Expt1 |
| YFFDFLDEQAEK                | 1  | 226958474                                                                                 | N-Term(iTRAQ4plex), K12(iTRAQ4plex)                                                | 1839.90837 | 59 |      | Expt1 |
| DCTVEMPILK                  | 2  | 149253672;6753548;7304989;282721029                                                       | N-Term(iTRAQ4plex), C2(Methylthio), K10(iTRAQ4plex)                                | 1482.76738 | 59 | 3.04 | Expt1 |

|                         |   |                              |                                                                      |            |    |      |       |
|-------------------------|---|------------------------------|----------------------------------------------------------------------|------------|----|------|-------|
| LIEEVMIGEDK             | 4 | 126521835                    | N-Term(iTRAQ4plex), K11(iTRAQ4plex)                                  | 1563.86186 | 59 | 3.01 | Expt1 |
| TMLELLNQLDGFTEATK       | 2 | 7110703                      | N-Term(iTRAQ4plex), K16(iTRAQ4plex)                                  | 2111.13791 | 59 | 3.32 | Expt1 |
| NSDGAVTWDEYNIQMYDR      | 2 | 114205428                    | N-Term(iTRAQ4plex)                                                   | 2321.03057 | 59 | 3.54 | Expt1 |
| GDSGGPLVIR              | 2 | 84794609                     | N-Term(iTRAQ4plex)                                                   | 1114.63262 | 59 | 3.42 | Expt1 |
| VNDFRQQTEDLYNEMK        | 2 | 60592758;60593032            | N-Term(iTRAQ4plex), K16(iTRAQ4plex)                                  | 2309.10514 | 59 | 3.51 | Expt1 |
| QDLSPEEAYDLGR           | 2 | 158303322                    | N-Term(iTRAQ4plex)                                                   | 1636.79656 | 59 | 4.04 | Expt1 |
| IAPQYYDMSNFQCEAK        | 2 | 110835723                    | N-Term(iTRAQ4plex), C14(Methylthio), K17(iTRAQ4plex)                 | 2339.07657 | 59 | 3.64 | Expt1 |
| NQDLAPNSAEQASILSVTK     | 2 | 13385872                     | N-Term(iTRAQ4plex), K20(iTRAQ4plex)                                  | 2387.30765 | 59 | 3.70 | Expt1 |
| LQPMTEIVSR              | 2 | 6678483                      | N-Term(iTRAQ4plex)                                                   | 1432.75896 | 59 | 3.55 | Expt1 |
| ALDVGSGSGLTACFAR        | 2 | 226530884                    | N-Term(iTRAQ4plex), C14(Methylthio)                                  | 1827.93096 | 59 | 3.33 | Expt1 |
| TGQEVVFAEPDNK           | 2 | 34996495                     | N-Term(iTRAQ4plex), K14(iTRAQ4plex)                                  | 1820.96648 | 59 | 2.96 | Expt1 |
| TVLMLADQMISR            | 1 | 22165382                     | N-Term(iTRAQ4plex), M9(Oxidation)                                    | 1537.82219 | 59 |      | Expt1 |
| GEISSTQDAMMEEIFR        | 3 | 30519997                     | N-Term(iTRAQ4plex), M10(Oxidation), M11(Oxidation)                   | 2019.91495 | 59 | 2.93 | Expt1 |
| VNAVNTVVMTPMGR          | 2 | 146134409                    | N-Term(iTRAQ4plex)                                                   | 1729.92473 | 59 | 3.21 | Expt1 |
| LYTVDYLSNMVGGGR         | 3 | 30519997                     | N-Term(iTRAQ4plex), M10(Oxidation)                                   | 1747.88335 | 59 |      | Expt1 |
| ELAPLQELIEK             | 2 | 62412947;21704148            | N-Term(iTRAQ4plex), K11(iTRAQ4plex)                                  | 1570.93926 | 59 | 3.52 | Expt1 |
| SSLSDISLLQIEPR          | 4 | 13385500                     | N-Term(iTRAQ4plex)                                                   | 1788.98362 | 59 | 3.50 | Expt1 |
| SYLYFTQFK               | 2 | 18250288                     | N-Term(iTRAQ4plex), K9(iTRAQ4plex)                                   | 1484.81157 | 59 | 3.45 | Expt1 |
| LYSFTVQENSR             | 5 | 7305007                      | N-Term(iTRAQ4plex)                                                   | 1487.76262 | 59 | 2.90 | Expt1 |
| LILASGGPQALVNIMR        | 2 | 6671684                      | N-Term(iTRAQ4plex), M16(Oxidation)                                   | 1926.13694 | 59 | 3.97 | Expt1 |
| NCMTDLLAK               | 2 | 161016826                    | N-Term(iTRAQ4plex), C2(Methylthio), K9(iTRAQ4plex)                   | 1342.67497 | 59 | 3.34 | Expt1 |
| VIESTQDLGNDLAGVMALQR    | 2 | 117938332;117938334          | N-Term(iTRAQ4plex)                                                   | 2274.19791 | 59 | 5.62 | Expt1 |
| LVSQDNFGLLEAAVEAAVR     | 2 | 55926127                     | N-Term(iTRAQ4plex)                                                   | 2146.17148 | 59 | 4.84 | Expt1 |
| YFVTFPPYPMNGR           | 1 | 120537241                    | N-Term(iTRAQ4plex), N11(Deamidated)                                  | 1799.85967 | 59 |      | Expt1 |
| DMDLIDVNEAFAPQFLSVQK    | 3 | 29126205                     | N-Term(iTRAQ4plex), K20(iTRAQ4plex)                                  | 2568.33561 | 59 | 4.83 | Expt1 |
| YPASTVQILGAEK           | 1 | 126090932                    | N-Term(iTRAQ4plex), K13(iTRAQ4plex)                                  | 1664.94988 | 59 |      | Expt1 |
| VEELEDQGTLANVFILR       | 2 | 162417959;162417957          | N-Term(iTRAQ4plex)                                                   | 2218.18778 | 59 | 3.06 | Expt1 |
| TLVSTVGSVMVFSEGEAQR     | 4 | 124486712                    | N-Term(iTRAQ4plex)                                                   | 2042.04105 | 59 | 3.90 | Expt1 |
| GNLEVLLFTIQSK           | 6 | 55926127;117938332;117938334 | N-Term(iTRAQ4plex), K13(iTRAQ4plex)                                  | 1750.04605 | 59 | 3.98 | Expt1 |
| QQQFENLDQQLR            | 4 | 13385878                     | N-Term(iTRAQ4plex)                                                   | 1690.86431 | 59 | 3.95 | Expt1 |
| NLMTSQPQMAK             | 2 | 9790161                      | N-Term(iTRAQ4plex), K11(iTRAQ4plex)                                  | 1536.81291 | 58 | 4.31 | Expt1 |
| EQEIAAVQAR              | 4 | 124486712                    | N-Term(iTRAQ4plex)                                                   | 1258.68706 | 58 | 3.57 | Expt1 |
| ELDDLQWQIER             | 2 | 55926127                     | N-Term(iTRAQ4plex)                                                   | 1717.85686 | 58 | 4.06 | Expt1 |
| ISMADVDLNVAAPK          | 2 | 61743961                     | N-Term(iTRAQ4plex), M3(Oxidation), K14(iTRAQ4plex)                   | 1747.95682 | 58 | 3.18 | Expt1 |
| GSPDQYLAGLLSLAENNK      | 2 | 30424744                     | N-Term(iTRAQ4plex), K18(iTRAQ4plex)                                  | 2178.17374 | 58 | 3.25 | Expt1 |
| VLAQNSGFDLQETLVK        | 2 | 6753324                      | N-Term(iTRAQ4plex), K16(iTRAQ4plex)                                  | 2050.15262 | 58 | 4.38 | Expt1 |
| QGQIDNQYQSLELGEK        | 2 | 115496850                    | N-Term(iTRAQ4plex), K17(iTRAQ4plex)                                  | 2251.18576 | 58 | 3.38 | Expt1 |
| LTITSNPEMTPFGER         | 2 | 227908790                    | N-Term(iTRAQ4plex)                                                   | 1836.93413 | 58 | 4.65 | Expt1 |
| DFMAALEAEPYDDIVGETVEK   | 2 | 148747189                    | N-Term(iTRAQ4plex), K21(iTRAQ4plex)                                  | 2630.29264 | 58 | 3.33 | Expt1 |
| LFLAGYELTPTMR           | 2 | 29825827                     | N-Term(iTRAQ4plex)                                                   | 1655.89922 | 58 | 4.11 | Expt1 |
| DYLDFLDDEEDQGIYQNK      | 2 | 33859484                     | N-Term(iTRAQ4plex), K18(iTRAQ4plex)                                  | 2508.17026 | 58 | 3.27 | Expt1 |
| EFINLQSALESER           | 4 | 134949013                    | N-Term(iTRAQ4plex)                                                   | 1679.87676 | 58 | 3.38 | Expt1 |
| NQLDQEVFLSTSIQALK       | 2 | 55741463                     | N-Term(iTRAQ4plex), K18(iTRAQ4plex)                                  | 2351.27378 | 58 | 3.98 | Expt1 |
| TDLNPNDLQGGDDLDPNYVLSRR | 2 | 10946574                     | N-Term(iTRAQ4plex)                                                   | 2662.27823 | 58 | 3.77 | Expt1 |
| ADMVIEAVFEDLGVK         | 2 | 33859811                     | N-Term(iTRAQ4plex), M3(Oxidation), K15(iTRAQ4plex)                   | 1940.03519 | 58 | 3.71 | Expt1 |
| GQPFVLLIATEEGFK         | 2 | 31543120                     | N-Term(iTRAQ4plex), K16(iTRAQ4plex)                                  | 2066.14580 | 58 | 2.90 | Expt1 |
| VPAEQEQIMDSDTFEK        | 2 | 27370012                     | N-Term(iTRAQ4plex), K16(iTRAQ4plex)                                  | 2140.07956 | 58 | 3.49 | Expt1 |
| ASVSTNQDTEENDQELGMK     | 2 | 124486923                    | N-Term(iTRAQ4plex), K19(iTRAQ4plex)                                  | 2370.10288 | 58 | 2.97 | Expt1 |
| ICDPYSWLEDPDSEQTK       | 2 | 6755152                      | N-Term(iTRAQ4plex), C2(Methylthio), K17(iTRAQ4plex)                  | 2360.07547 | 58 | 3.65 | Expt1 |
| GTITTLVLK               | 2 | 6755863                      | N-Term(iTRAQ4plex), K9(iTRAQ4plex)                                   | 1233.81108 | 58 | 2.96 | Expt1 |
| GLEDQNLWQVGR            | 2 | 170014682;170014686          | N-Term(iTRAQ4plex)                                                   | 1558.81572 | 58 | 3.94 | Expt1 |
| GDAVCTGSGWSQPFCEEK      | 2 | 109627652                    | N-Term(iTRAQ4plex), C5(Methylthio), C16(Methylthio), K19(iTRAQ4plex) | 2367.99076 | 58 | 4.19 | Expt1 |
| GAQAIVVYDITNEESFAR      | 2 | 13385374                     | N-Term(iTRAQ4plex)                                                   | 2198.13260 | 58 | 4.55 | Expt1 |
| FDVSGLTTEQMLR           | 2 | 27597069                     | N-Term(iTRAQ4plex)                                                   | 1640.84892 | 58 | 3.54 | Expt1 |

|                            |    |                                      |                                                                     |            |    |      |       |
|----------------------------|----|--------------------------------------|---------------------------------------------------------------------|------------|----|------|-------|
| QEPGENSEILPSLK             | 2  | 145275179;15011841                   | N-Term(iTRAQ4plex), K14(iTRAQ4plex)                                 | 1828.98992 | 58 | 3.51 | Expt1 |
| GYLVTQDELDTLEEFK           | 2  | 124249077                            | N-Term(iTRAQ4plex), K17(iTRAQ4plex)                                 | 2316.19352 | 58 | 3.73 | Expt1 |
| VENQENVNLVDDTELK           | 4  | 157951604                            | N-Term(iTRAQ4plex), K18(iTRAQ4plex)                                 | 2347.22568 | 58 | 4.23 | Expt1 |
| IIGYTPDLDPETVDDAFAR        | 7  | 6678902                              | N-Term(iTRAQ4plex)                                                  | 2252.12578 | 58 | 3.84 | Expt1 |
| VVDYSQFQESDDADEYGR         | 1  | 224809559;224809563                  | N-Term(iTRAQ4plex)                                                  | 2382.01763 | 58 |      | Expt1 |
| NVQGIIDILK                 | 2  | 134031976                            | N-Term(iTRAQ4plex), K10(iTRAQ4plex)                                 | 1400.88042 | 58 | 3.13 | Expt1 |
| LITLEEEMTK                 | 1  | 42415475                             | N-Term(iTRAQ4plex), M8(Oxidation), K10(iTRAQ4plex)                  | 1510.83660 | 58 |      | Expt1 |
| LLDSLEPPGEPGSPSTIPENDTVDGR | 2  | 9790261                              | N-Term(iTRAQ4plex)                                                  | 2836.40183 | 58 | 3.49 | Expt1 |
| LGESVQDLSSFDEYSSELK        | 2  | 31981588                             | N-Term(iTRAQ4plex), K19(iTRAQ4plex)                                 | 2421.19919 | 58 | 3.27 | Expt1 |
| DIANENEAQFQIR              | 2  | 88853578                             | N-Term(iTRAQ4plex)                                                  | 1691.84953 | 58 | 4.03 | Expt1 |
| GGSVQVLEDQELTCQPEPLVVK     | 2  | 149251616;9507079                    | N-Term(iTRAQ4plex), C14(Methylthio), K22(iTRAQ4plex)                | 2702.40964 | 58 | 4.51 | Expt1 |
| VDDEILGFISEATR             | 2  | 121949760                            | N-Term(iTRAQ4plex)                                                  | 1805.94559 | 58 | 3.00 | Expt1 |
| LFQVEYAIK                  | 6  | 7106387;94388526;94388799            | N-Term(iTRAQ4plex), K12(iTRAQ4plex)                                 | 1711.99516 | 58 | 3.50 | Expt1 |
| VEADVVPQVQGDLDK            | 3  | 149263538                            | N-Term(iTRAQ4plex), K15(iTRAQ4plex)                                 | 1882.04888 | 57 | 3.11 | Expt1 |
| VSMPPDELNLK                | 3  | 61743961                             | N-Term(iTRAQ4plex), K11(iTRAQ4plex)                                 | 1532.86809 | 57 | 3.63 | Expt1 |
| EDFDVEPADSEGNCPSLTFASK     | 2  | 148277056                            | N-Term(iTRAQ4plex), C14(Methylthio), K23(iTRAQ4plex)                | 2807.22672 | 57 | 3.80 | Expt1 |
| EIADGLCLEVEGK              | 4  | 149255389                            | N-Term(iTRAQ4plex), C7(Methylthio), K13(iTRAQ4plex)                 | 1709.87602 | 57 | 3.32 | Expt1 |
| EIANGLCLEVEGK              | 4  | 82922656                             | N-Term(iTRAQ4plex), N4(Deamidated), C7(Methylthio), K13(iTRAQ4plex) | 1709.87602 | 57 | 3.32 | Expt1 |
| FATVQYSDDPQTEFGLDTLGSSTIR  | 1  | 115647999                            | N-Term(iTRAQ4plex)                                                  | 3064.45383 | 57 |      | Expt1 |
| ALTVPELTQMFDSK             | 4  | 33859488;21746161                    | N-Term(iTRAQ4plex), K15(iTRAQ4plex)                                 | 1996.07297 | 57 | 4.23 | Expt1 |
| YGPMEEPQVIEK               | 2  | 90903233;90903235                    | N-Term(iTRAQ4plex), K12(iTRAQ4plex)                                 | 1707.89067 | 57 | 3.72 | Expt1 |
| GITEPPGFIVFDR              | 4  | 149269903;161016843                  | N-Term(iTRAQ4plex)                                                  | 1738.93096 | 57 | 3.56 | Expt1 |
| GALVINDLGGDFK              | 1  | 31982273                             | N-Term(iTRAQ4plex), K14(iTRAQ4plex)                                 | 1705.97869 | 57 |      | Expt1 |
| FIDTSQFILNR                | 2  | 149260575;83627687                   | N-Term(iTRAQ4plex)                                                  | 1497.82073 | 57 | 3.43 | Expt1 |
| IDSAASTSYEVGNPPDYR         | 2  | 82932679                             | N-Term(iTRAQ4plex)                                                  | 2100.00322 | 57 | 5.05 | Expt1 |
| NMEEVEAIR                  | 2  | 85861164                             | N-Term(iTRAQ4plex)                                                  | 1335.66863 | 57 | 3.36 | Expt1 |
| SAFSVGITTSYPEER            | 2  | 206597458;61098164                   | N-Term(iTRAQ4plex)                                                  | 1787.89495 | 57 | 3.57 | Expt1 |
| GSGIFDESTPVQTR             | 2  | 39573709                             | N-Term(iTRAQ4plex)                                                  | 1637.83098 | 57 | 3.71 | Expt1 |
| SITIANQTNCLYVTK            | 1  | 40254595                             | N-Term(iTRAQ4plex), C10(Methylthio), K16(iTRAQ4plex)                | 2100.11222 | 57 |      | Expt1 |
| MIENGLSFLPTLR              | 5  | 20137008                             | N-Term(iTRAQ4plex), N4(Deamidated)                                  | 1722.92375 | 57 | 3.39 | Expt1 |
| CDSGFALDSEER               | 4  | 118197277                            | N-Term(iTRAQ4plex), C1(Methylthio)                                  | 1518.63384 | 57 | 3.49 | Expt1 |
| SSVLESVGR                  | 1  | 71061458;71061455                    | N-Term(iTRAQ4plex)                                                  | 1190.68755 | 57 |      | Expt1 |
| TDLEFTFVLK                 | 2  | 124249090                            | N-Term(iTRAQ4plex), K11(iTRAQ4plex)                                 | 1628.91924 | 57 | 3.00 | Expt1 |
| QPTVTSVCSESAQELAEGR        | 3  | 170650623;170650627                  | N-Term(iTRAQ4plex), C8(Methylthio)                                  | 2310.08622 | 57 | 3.10 | Expt1 |
| LISLTDENALAGNEELTVK        | 2  | 6755863                              | N-Term(iTRAQ4plex), K19(iTRAQ4plex)                                 | 2318.27579 | 57 | 4.03 | Expt1 |
| DEGNLYDDALMK               | 2  | 161016799                            | N-Term(iTRAQ4plex), K12(iTRAQ4plex)                                 | 1671.81743 | 57 | 3.19 | Expt1 |
| NLTVTEAVQAPQLAAEAVNVK      | 2  | 91064867                             | N-Term(iTRAQ4plex), K22(iTRAQ4plex)                                 | 2567.47190 | 57 | 4.17 | Expt1 |
| DIDITSPEFMK                | 4  | 61743961                             | N-Term(iTRAQ4plex), M10(Oxidation), K12(iTRAQ4plex)                 | 1712.91289 | 57 | 3.32 | Expt1 |
| SLQDIAILGMDELSEEDK         | 2  | 31980648                             | N-Term(iTRAQ4plex), K19(iTRAQ4plex)                                 | 2407.25388 | 57 | 3.04 | Expt1 |
| VAEFNNVPLSEEEVTSVK         | 2  | 148747189                            | N-Term(iTRAQ4plex), K19(iTRAQ4plex)                                 | 2380.26120 | 57 | 4.44 | Expt1 |
| GDDVINASGYR                | 1  | 16905127                             | N-Term(iTRAQ4plex)                                                  | 1310.64739 | 57 |      | Expt1 |
| LTLLEVCGGTGANFK            | 1  | 33563290;125490373;61098178;67003561 | N-Term(iTRAQ4plex), C8(Methylthio), K15(iTRAQ4plex)                 | 1856.99393 | 57 |      | Expt1 |
| VTIGLLSLDDPQR              | 3  | 226531047;226531069                  | N-Term(iTRAQ4plex)                                                  | 1570.89726 | 57 | 3.04 | Expt1 |
| GSGFELALMYNTPR             | 1  | 45598396;22550094                    | N-Term(iTRAQ4plex), M9(Oxidation)                                   | 1715.85600 | 57 |      | Expt1 |
| LGPDDVTVIDAIR              | 2  | 27804321;76880494;76880500           | N-Term(iTRAQ4plex)                                                  | 1642.87944 | 57 | 2.91 | Expt1 |
| EIVSDVTDGNEQLSVVR          | 2  | 21450111                             | N-Term(iTRAQ4plex)                                                  | 2004.03691 | 57 | 2.95 | Expt1 |
| TTLLEGFAGVEEAR             | 1  | 124378033                            | N-Term(iTRAQ4plex)                                                  | 1636.87187 | 57 |      | Expt1 |
| YGLFPANYVELR               | 10 | 75677414                             | N-Term(iTRAQ4plex)                                                  | 1585.85135 | 57 | 3.77 | Expt1 |
| YVFFWAPIMK                 | 2  | 21312594                             | N-Term(iTRAQ4plex), K10(iTRAQ4plex)                                 | 1527.87126 | 56 | 3.26 | Expt1 |
| DVLLQVEDER                 | 4  | 114326446                            | N-Term(iTRAQ4plex)                                                  | 1359.72685 | 56 | 3.65 | Expt1 |
| VGETTIDLENR                | 2  | 149270772;149270774;153791796        | N-Term(iTRAQ4plex)                                                  | 1390.73100 | 56 | 2.83 | Expt1 |
| FVVDLSQVAPTIDIEEGMR        | 2  | 33859604                             | N-Term(iTRAQ4plex)                                                  | 2265.12815 | 56 | 3.01 | Expt1 |
| SLQPEIQFPQTASR             | 1  | 226958456                            | N-Term(iTRAQ4plex)                                                  | 1842.98503 | 56 |      | Expt1 |

|                                   |    |                                                                               |                                                      |            |    |      |       |
|-----------------------------------|----|-------------------------------------------------------------------------------|------------------------------------------------------|------------|----|------|-------|
| LALEPEVQDLQLER                    | 2  | 3108908                                                                       | N-Term(iTRAQ4plex)                                   | 1884.03191 | 56 | 3.26 | Expt1 |
| GSSGVGLTAAVTTDQETGER              | 3  | 33859484                                                                      | N-Term(iTRAQ4plex)                                   | 2080.02958 | 56 | 3.87 | Expt1 |
| LLADQAEAR                         | 5  | 149258488;226958653;226958657;149258392;82953132;149265207;149274550;82999755 | N-Term(iTRAQ4plex)                                   | 1130.62932 | 56 | 3.57 | Expt1 |
| ALAGCDFLTISPK                     | 14 | 33859640                                                                      | N-Term(iTRAQ4plex), C5(Methylthio), K13(iTRAQ4plex)  | 1669.89653 | 56 | 3.52 | Expt1 |
| ELEASELDTICPK                     | 3  | 31981269                                                                      | N-Term(iTRAQ4plex), C12(Methylthio), K14(iTRAQ4plex) | 1910.93193 | 56 | 2.95 | Expt1 |
| NLEVSSCVSSEGPSEAR                 | 2  | 124486923                                                                     | N-Term(iTRAQ4plex), C7(Methylthio)                   | 1940.88738 | 56 | 2.99 | Expt1 |
| GFSGLQGPPGSPGSPGEGQPSGASGPAGPR    | 2  | 34328108                                                                      | N-Term(iTRAQ4plex)                                   | 2791.32383 | 56 | 6.59 | Expt1 |
| VYGTGSLALYEK                      | 2  | 163838641;163838648                                                           | N-Term(iTRAQ4plex), K12(iTRAQ4plex)                  | 1588.88567 | 56 | 4.39 | Expt1 |
| ELGIWEPLAVK                       | 2  | 6753320                                                                       | N-Term(iTRAQ4plex), K11(iTRAQ4plex)                  | 1542.92192 | 56 | 3.10 | Expt1 |
| DVPVVAILGSGGGFR                   | 2  | 6679369                                                                       | N-Term(iTRAQ4plex)                                   | 1587.90213 | 56 | 3.21 | Expt1 |
| TLGALESLTQNLAR                    | 2  | 224967060                                                                     | N-Term(iTRAQ4plex)                                   | 1630.93181 | 56 | 4.10 | Expt1 |
| VCLEITEDGGESIEVPGSR               | 2  | 6678103                                                                       | N-Term(iTRAQ4plex), C2(Methylthio)                   | 2180.03740 | 56 | 3.25 | Expt1 |
| NGMLNVSPIGR                       | 2  | 33468959;8393988                                                              | N-Term(iTRAQ4plex), N1(Deamidated)                   | 1302.70073 | 56 | 2.83 | Expt1 |
| GEGPEVDVNLPK                      | 7  | 61743961                                                                      | N-Term(iTRAQ4plex), K12(iTRAQ4plex)                  | 1541.84929 | 56 | 4.17 | Expt1 |
| FDAGELITQR                        | 5  | 6679299;85702063                                                              | N-Term(iTRAQ4plex)                                   | 1293.69451 | 56 | 3.43 | Expt1 |
| SLQALGEVIAELR                     | 3  | 162138894                                                                     | N-Term(iTRAQ4plex)                                   | 1671.93999 | 56 | 3.84 | Expt1 |
| TCGDFSGALEDISK                    | 4  | 6754036                                                                       | N-Term(iTRAQ4plex), C2(Methylthio), K15(iTRAQ4plex)  | 1923.91716 | 56 | 3.73 | Expt1 |
| GITGVDLFGTTDAVVK                  | 1  | 226823359                                                                     | N-Term(iTRAQ4plex), K16(iTRAQ4plex)                  | 1881.05522 | 56 |      | Expt1 |
| GSNVALGYDEGSIIVK                  | 1  | 29789080                                                                      | N-Term(iTRAQ4plex), K17(iTRAQ4plex)                  | 2024.09726 | 56 |      | Expt1 |
| SVGDLTLAFDGR                      | 2  | 42490751                                                                      | N-Term(iTRAQ4plex)                                   | 1523.78325 | 56 | 3.63 | Expt1 |
| LLSEEVDFSSQITQVK                  | 3  | 38604071                                                                      | N-Term(iTRAQ4plex), K18(iTRAQ4plex)                  | 2315.24118 | 56 | 3.50 | Expt1 |
| TGLDSPTGFSSDITANSFTVHVVAPR        | 2  | 46849812                                                                      | N-Term(iTRAQ4plex)                                   | 3022.46482 | 56 | 3.00 | Expt1 |
| VNAGDQPGADLGPLTPQAK               | 6  | 19527258                                                                      | N-Term(iTRAQ4plex), K20(iTRAQ4plex)                  | 2250.23746 | 56 | 5.54 | Expt1 |
| EAAIQSGLASLAEQASIR                | 1  | 159131876                                                                     | N-Term(iTRAQ4plex)                                   | 2088.11460 | 56 |      | Expt1 |
| LEEDVLPENGIK                      | 3  | 148747546                                                                     | N-Term(iTRAQ4plex), M9(Oxidation), K12(iTRAQ4plex)   | 1676.90056 | 56 | 3.15 | Expt1 |
| LFVGNLPADITEDEFK                  | 4  | 149252953;23956214                                                            | N-Term(iTRAQ4plex), K16(iTRAQ4plex)                  | 2096.11650 | 56 | 4.07 | Expt1 |
| AQDLDDLENTVATLR                   | 2  | 82998566;15277319                                                             | N-Term(iTRAQ4plex)                                   | 1817.94267 | 56 | 3.42 | Expt1 |
| QLPIYTEAIVEMYR                    | 2  | 29336026                                                                      | N-Term(iTRAQ4plex), M12(Oxidation)                   | 1885.98868 | 56 | 4.33 | Expt1 |
| TAGTICLETFK                       | 2  | 194018529;58331156;194018533                                                  | N-Term(iTRAQ4plex), C6(Methylthio), K11(iTRAQ4plex)  | 1517.80266 | 55 | 4.18 | Expt1 |
| APSIIFDELDAIGTK                   | 2  | 228008337                                                                     | N-Term(iTRAQ4plex), K16(iTRAQ4plex)                  | 1991.13956 | 55 | 3.23 | Expt1 |
| FPLFLNGR                          | 3  | 6678902                                                                       | N-Term(iTRAQ4plex), N6(Deamidated)                   | 1142.61455 | 55 |      | Expt1 |
| NTEDLTEEWLR                       | 2  | 188528613                                                                     | N-Term(iTRAQ4plex)                                   | 1549.76738 | 55 |      | Expt1 |
| GFGFVTFENEDVVEK                   | 4  | 17157989                                                                      | N-Term(iTRAQ4plex), K15(iTRAQ4plex)                  | 2005.02884 | 55 | 3.33 | Expt1 |
| YDDPPDWQEILTYFR                   | 1  | 114205431                                                                     | N-Term(iTRAQ4plex)                                   | 2102.00224 | 55 |      | Expt1 |
| YLGSSSCIAGVLVPVQGEPR              | 2  | 37537522                                                                      | N-Term(iTRAQ4plex), C7(Methylthio)                   | 2249.15494 | 55 | 3.67 | Expt1 |
| TDVEINGLFIPK                      | 1  | 6681115                                                                       | N-Term(iTRAQ4plex), N6(Deamidated), K12(iTRAQ4plex)  | 1634.92827 | 55 |      | Expt1 |
| MIQALELDPNLYR                     | 10 | 29336026                                                                      | N-Term(iTRAQ4plex), M1(Oxidation)                    | 1735.91837 | 55 | 3.61 | Expt1 |
| GIYTGSLAGLLR                      | 2  | 21312994                                                                      | N-Term(iTRAQ4plex)                                   | 1364.80351 | 55 | 3.11 | Expt1 |
| FPLDYISFPPTPTTLTGR                | 3  | 33239421;260166704;260166709;260166715;260166706;260166711                    | N-Term(iTRAQ4plex)                                   | 2427.27617 | 55 | 3.73 | Expt1 |
| LYDIEQQITDALENIR                  | 2  | 19525729                                                                      | N-Term(iTRAQ4plex)                                   | 2206.15647 | 55 | 4.68 | Expt1 |
| DVSTTLNADEAVAR                    | 1  | 114145505                                                                     | N-Term(iTRAQ4plex)                                   | 1605.82414 | 55 |      | Expt1 |
| LVFGLNGR                          | 6  | 149265958;183074535;7305395                                                   | N-Term(iTRAQ4plex), N7(Deamidated)                   | 1133.68279 | 55 | 3.04 | Expt1 |
| VSWNPVPGATEYR                     | 2  | 115647999                                                                     | N-Term(iTRAQ4plex)                                   | 1619.83074 | 55 | 2.95 | Expt1 |
| VPGATMLLAK                        | 1  | 19527258                                                                      | N-Term(iTRAQ4plex), K10(iTRAQ4plex)                  | 1288.77605 | 55 |      | Expt1 |
| MLGQMTDQVADLR                     | 4  | 31543942                                                                      | N-Term(iTRAQ4plex)                                   | 1621.82048 | 55 | 4.27 | Expt1 |
| LEGLDALQK                         | 2  | 54607171;113195684                                                            | N-Term(iTRAQ4plex), K10(iTRAQ4plex)                  | 1403.81023 | 55 | 3.16 | Expt1 |
| IMLPWDPGSK                        | 2  | 6755372                                                                       | N-Term(iTRAQ4plex), K10(iTRAQ4plex)                  | 1431.79888 | 55 | 3.44 | Expt1 |
| AVTIATPATAAPAAVSAATTTSAQEPPAAPEPR | 2  | 194440682;194440687                                                           | N-Term(iTRAQ4plex)                                   | 3334.73362 | 55 | 2.93 | Expt1 |
| GESPVDYDGGR                       | 1  | 149262992;58037267                                                            | N-Term(iTRAQ4plex)                                   | 1295.60112 | 55 |      | Expt1 |
| SSGYGAGLSSASSSEDILAMLR            | 2  | 226423931                                                                     | N-Term(iTRAQ4plex)                                   | 2303.13755 | 55 | 3.47 | Expt1 |

|                           |    |                                                                      |                                                                     |            |    |      |       |
|---------------------------|----|----------------------------------------------------------------------|---------------------------------------------------------------------|------------|----|------|-------|
| LPVGTATTLYFR              | 4  | 226342960;19923070                                                   | N-Term(iTRAQ4plex)                                                  | 1482.84308 | 55 | 3.18 | Expt1 |
| LYEPDQLQELK               | 1  | 126090857                                                            | N-Term(iTRAQ4plex), K11(iTRAQ4plex)                                 | 1663.91655 | 55 |      | Expt1 |
| SLTSEDSAVYYCAR            | 1  | 83008262;149274201;149274205                                         | N-Term(iTRAQ4plex), C12(Methylthio)                                 | 1754.78801 | 55 |      | Expt1 |
| LLYNNVSNFGR               | 2  | 51491845                                                             | N-Term(iTRAQ4plex)                                                  | 1440.77287 | 55 | 3.40 | Expt1 |
| AQFEGIVTDLIK              | 3  | 162461907                                                            | N-Term(iTRAQ4plex), K12(iTRAQ4plex)                                 | 1621.94327 | 55 |      | Expt1 |
| LMLLLEVISGER              | 2  | 61097906;11230802;7304855;157951643                                  | N-Term(iTRAQ4plex), M2(Oxidation)                                   | 1532.88713 | 55 | 3.34 | Expt1 |
| EADIQNFTSFISK             | 2  | 31981810                                                             | N-Term(iTRAQ4plex), K13(iTRAQ4plex)                                 | 1787.94060 | 55 | 2.97 | Expt1 |
| ALYFEYDGTGFSK             | 2  | 110347564;110815853                                                  | N-Term(iTRAQ4plex), K13(iTRAQ4plex)                                 | 1829.92143 | 55 | 3.36 | Expt1 |
| TPAAAPASTPAQR             | 1  | 170295844                                                            | N-Term(iTRAQ4plex)                                                  | 1382.75139 | 55 |      | Expt1 |
| TVLMLADQMISR              | 1  | 22165382                                                             | N-Term(iTRAQ4plex), M4(Oxidation), M9(Oxidation)                    | 1553.81975 | 55 |      | Expt1 |
| EDQVIQLMNTIFSK            | 2  | 34996495                                                             | N-Term(iTRAQ4plex), K14(iTRAQ4plex)                                 | 1954.06400 | 55 | 3.75 | Expt1 |
| YPLIDPSQGATFEMNEYK        | 2  | 134288917                                                            | N-Term(iTRAQ4plex), K20(iTRAQ4plex)                                 | 2617.36448 | 55 | 3.56 | Expt1 |
| ASGELMTVAR                | 2  | 33468897                                                             | N-Term(iTRAQ4plex)                                                  | 1178.63347 | 55 | 3.11 | Expt1 |
| DQITAGNAAR                | 2  | 13385434                                                             | N-Term(iTRAQ4plex)                                                  | 1160.61736 | 55 | 3.17 | Expt1 |
| MLSPEQLTIFR               | 6  | 225543183                                                            | N-Term(iTRAQ4plex)                                                  | 1478.81743 | 55 | 3.93 | Expt1 |
| LTDQVMQNPQVLAALQER        | 2  | 6679012                                                              | N-Term(iTRAQ4plex)                                                  | 2198.17801 | 55 | 4.60 | Expt1 |
| ASGPGLNNTTGVASPLPVEFTIDAK | 2  | 125347376                                                            | N-Term(iTRAQ4plex), K24(iTRAQ4plex)                                 | 2630.43875 | 55 | 4.22 | Expt1 |
| VTWDDSTFCVAVNPK           | 3  | 6753494                                                              | N-Term(iTRAQ4plex), C8(Methylthio), K13(iTRAQ4plex)                 | 1801.89372 | 55 | 3.19 | Expt1 |
| VVENLQDDFDNFYK            | 1  | 22094115;149274601;47458804;47458807                                 | N-Term(iTRAQ4plex), K14(iTRAQ4plex)                                 | 2034.00786 | 55 |      | Expt1 |
| CTYLVLDEADR               | 4  | 40068493;93587673;40068491                                           | N-Term(iTRAQ4plex), C1(Methylthio)                                  | 1487.70207 | 55 | 3.55 | Expt1 |
| QQVVSVEEALLATGQWK         | 2  | 149249577;47059073                                                   | N-Term(iTRAQ4plex), K17(iTRAQ4plex)                                 | 2174.21299 | 55 | 3.46 | Expt1 |
| CGTGIVGVFVK               | 5  | 158635992                                                            | N-Term(iTRAQ4plex), C1(Methylthio), K11(iTRAQ4plex)                 | 1413.78545 | 55 | 3.34 | Expt1 |
| DSTYSMSSTLTCLK            | 1  | 149255637;149255639;149255641                                        | N-Term(iTRAQ4plex), M6(Oxidation), K14(iTRAQ4plex)                  | 1838.93552 | 55 |      | Expt1 |
| VLSYAPGPLDNDMQQLAR        | 2  | 160333789                                                            | N-Term(iTRAQ4plex), M13(Oxidation)                                  | 2148.09116 | 55 | 3.56 | Expt1 |
| EGSSIGAIDSR               | 9  | 13385942                                                             | N-Term(iTRAQ4plex)                                                  | 1235.63579 | 54 | 3.81 | Expt1 |
| GLGFTMATEEAIR             | 2  | 239052674                                                            | N-Term(iTRAQ4plex), M6(Oxidation)                                   | 1668.87798 | 54 |      | Expt1 |
| SLAMEMVLGTDR              | 2  | 29789289                                                             | N-Term(iTRAQ4plex)                                                  | 1466.75102 | 54 | 3.66 | Expt1 |
| NLFNVVDCK                 | 1  | 29789343                                                             | N-Term(iTRAQ4plex), C8(Methylthio), K9(iTRAQ4plex)                  | 1385.71514 | 54 |      | Expt1 |
| SVDEVFGEVVK               | 2  | 165377065                                                            | N-Term(iTRAQ4plex), K11(iTRAQ4plex)                                 | 1495.83122 | 54 | 3.91 | Expt1 |
| TIAVDFSLDDIYDK            | 2  | 9789991                                                              | N-Term(iTRAQ4plex), K14(iTRAQ4plex)                                 | 1903.00064 | 54 | 3.31 | Expt1 |
| ATEMVEVGPEDDEVGAER        | 3  | 6679567                                                              | N-Term(iTRAQ4plex), M4(Oxidation)                                   | 2092.94913 | 54 | 4.38 | Expt1 |
| QVTQLAIDTEER              | 2  | 56699432;56699434                                                    | N-Term(iTRAQ4plex)                                                  | 1546.82280 | 54 | 3.44 | Expt1 |
| LSPVAEEFR                 | 11 | 160333304                                                            | N-Term(iTRAQ4plex)                                                  | 1191.65093 | 54 | 3.13 | Expt1 |
| IIEEAPAGINPEVR            | 1  | 94410500;186700620                                                   | N-Term(iTRAQ4plex)                                                  | 1748.96807 | 54 |      | Expt1 |
| LFLAGYELTPTMR             | 1  | 29825827                                                             | N-Term(iTRAQ4plex), M12(Oxidation)                                  | 1671.88994 | 54 |      | Expt1 |
| VWIISGQQLPK               | 2  | 9790167                                                              | N-Term(iTRAQ4plex), K11(iTRAQ4plex)                                 | 1556.94682 | 54 | 3.57 | Expt1 |
| FEDYLNESR                 | 5  | 28173550                                                             | N-Term(iTRAQ4plex)                                                  | 1387.66472 | 54 | 3.65 | Expt1 |
| DLQALTEAMYNLR             | 3  | 6679535                                                              | N-Term(iTRAQ4plex)                                                  | 1782.92301 | 54 | 3.61 | Expt1 |
| SVDLAEYAPNLR              | 2  | 149255994;149255996;149255998;49274606;254588045;281371356;254588047 | N-Term(iTRAQ4plex)                                                  | 1491.79387 | 54 | 3.49 | Expt1 |
| NTMSLLAANLLAGLR           | 1  | 17933768                                                             | N-Term(iTRAQ4plex)                                                  | 1816.02463 | 54 |      | Expt1 |
| EQWSNCPITIGQIR            | 1  | 6681079                                                              | N-Term(iTRAQ4plex), C6(Methylthio)                                  | 1721.82610 | 54 |      | Expt1 |
| QIYPPINVLPSLSR            | 4  | 19705578                                                             | N-Term(iTRAQ4plex)                                                  | 1741.01616 | 54 | 3.22 | Expt1 |
| LALETTVLVESYTLPDGR        | 4  | 22122825                                                             | N-Term(iTRAQ4plex)                                                  | 2121.16715 | 54 | 4.33 | Expt1 |
| ICDELILIK                 | 9  | 110625624                                                            | N-Term(iTRAQ4plex), C2(Methylthio), K10(iTRAQ4plex)                 | 1508.83745 | 54 | 3.72 | Expt1 |
| VTAMQLYECQLIDK            | 2  | 82950147;82950149;149264086                                          | N-Term(iTRAQ4plex), M4(Oxidation), C9(Methylthio), K14(iTRAQ4plex)  | 2005.00980 | 54 | 3.52 | Expt1 |
| EHMGNVVEALIALTN           | 1  | 27229055                                                             | N-Term(iTRAQ4plex)                                                  | 1754.92607 | 54 |      | Expt1 |
| GITTAAVCVYPAR             | 2  | 27777677                                                             | N-Term(iTRAQ4plex), C8(Methylthio)                                  | 1511.78533 | 54 | 3.24 | Expt1 |
| YAYFNGCSSPTAPLSPMSPPGYK   | 2  | 6753992                                                              | N-Term(iTRAQ4plex), N5(Deamidated), C7(Methylthio), K23(iTRAQ4plex) | 2770.29270 | 54 | 3.58 | Expt1 |
| DQADPQCLFLR               | 3  | 55926127                                                             | N-Term(iTRAQ4plex), C7(Methylthio)                                  | 1495.71745 | 54 | 3.15 | Expt1 |

|                                          |   |                                        |                                                                      |            |    |      |       |
|------------------------------------------|---|----------------------------------------|----------------------------------------------------------------------|------------|----|------|-------|
| LLVGAYDADVDIR                            | 2 | 187173282                              | N-Term(iTRAQ4plex)                                                   | 1563.85503 | 54 | 2.91 | Expt1 |
| LGMPQFLSTEAOQLLR                         | 2 | 158636007                              | N-Term(iTRAQ4plex), M3(Oxidation)                                    | 1951.04660 | 54 | 3.24 | Expt1 |
| LTAEIEQAAQYNAVR                          | 5 | 228480232;149257356                    | N-Term(iTRAQ4plex)                                                   | 2035.10135 | 54 | 3.94 | Expt1 |
| FLGCVDIK                                 | 1 | 6755210                                | N-Term(iTRAQ4plex), C4(Methylthio), K8(iTRAQ4plex)                   | 1228.67095 | 54 |      | Expt1 |
| YVSSLTEEISR                              | 1 | 21312570                               | N-Term(iTRAQ4plex)                                                   | 1427.75432 | 54 |      | Expt1 |
| GTSQNDPNWVVR                             | 4 | 149249577;47059073                     | N-Term(iTRAQ4plex)                                                   | 1516.76225 | 54 | 4.05 | Expt1 |
| EAMCPGVSGEDSLLLATQVEGQTTNLQR             | 5 | 28395018                               | N-Term(iTRAQ4plex), M3(Oxidation), C4(Methylthio)                    | 3240.53720 | 54 | 2.87 | Expt1 |
| FTQSALDCMGVEVGR                          | 3 | 118601017                              | N-Term(iTRAQ4plex), C8(Methylthio)                                   | 1802.83672 | 54 | 3.32 | Expt1 |
| AGATVYITGR                               | 2 | 31980844                               | N-Term(iTRAQ4plex)                                                   | 1152.65178 | 54 | 3.11 | Expt1 |
| AFLPVMK                                  | 1 | 16716597                               | N-Term(iTRAQ4plex), K8(iTRAQ4plex)                                   | 1224.70415 | 54 |      | Expt1 |
| YNVLGAETVLTQMR                           | 7 | 149270322;124487099                    | N-Term(iTRAQ4plex), M13(Oxidation)                                   | 1754.92691 | 54 | 4.44 | Expt1 |
| SIAFPSIGSGR                              | 7 | 41152517;283945572;283945575;283945579 | N-Term(iTRAQ4plex)                                                   | 1235.68730 | 54 | 2.92 | Expt1 |
| NQEQLLTLANILR                            | 2 | 9507129                                | N-Term(iTRAQ4plex)                                                   | 1669.96744 | 54 | 4.14 | Expt1 |
| GDGVVLVAPPLR                             | 6 | 13385806                               | N-Term(iTRAQ4plex)                                                   | 1336.80815 | 54 | 3.58 | Expt1 |
| LGGTCVNVGCVPK                            | 1 | 160298213                              | N-Term(iTRAQ4plex), C5(Methylthio), C10(Methylthio), K13(iTRAQ4plex) | 1626.80376 | 54 |      | Expt1 |
| SPYTVTVGQACNPAACR                        | 5 | 125347376                              | N-Term(iTRAQ4plex), C11(Methylthio), C16(Methylthio)                 | 1973.88347 | 54 | 3.39 | Expt1 |
| ECPSIFAWAIR                              | 2 | 7305369                                | N-Term(iTRAQ4plex), C2(Methylthio)                                   | 1540.74419 | 54 | 3.20 | Expt1 |
| VSSTATTQDVIETLAEK                        | 3 | 145587092                              | N-Term(iTRAQ4plex), K17(iTRAQ4plex)                                  | 2081.13187 | 54 | 3.09 | Expt1 |
| LPSDVTTSVR                               | 5 | 8393866                                | N-Term(iTRAQ4plex)                                                   | 1216.70293 | 54 |      | Expt1 |
| ASTSTEAPQQR                              | 2 | 117956399;117956395;117956397          | N-Term(iTRAQ4plex)                                                   | 1416.72209 | 54 | 3.11 | Expt1 |
| EVAFDVEIPK                               | 2 | 124249351                              | N-Term(iTRAQ4plex), K10(iTRAQ4plex)                                  | 1434.81853 | 54 | 3.68 | Expt1 |
| LDACEGDSGGPLVISDNR                       | 2 | 188536038                              | N-Term(iTRAQ4plex), C4(Methylthio)                                   | 2007.92522 | 54 | 3.18 | Expt1 |
| IFTVDNLLPVGK                             | 4 | 126518317                              | N-Term(iTRAQ4plex), K13(iTRAQ4plex)                                  | 1718.01348 | 54 | 3.95 | Expt1 |
| ASLGSLEGEVEAEASSPK                       | 4 | 61743961                               | N-Term(iTRAQ4plex), K18(iTRAQ4plex)                                  | 2049.06498 | 54 | 3.32 | Expt1 |
| LIDDYGGDEDELAGPGGGAGPGGGLYGELPEGTSITVDSK | 2 | 6755252                                | N-Term(iTRAQ4plex), K42(iTRAQ4plex)                                  | 4238.02602 | 54 | 4.68 | Expt1 |
| EAEQSNVALQR                              | 2 | 6755903                                | N-Term(iTRAQ4plex)                                                   | 1388.72344 | 54 | 3.91 | Expt1 |
| VIAALLQTMEDQGNQR                         | 2 | 29789199;149272031                     | N-Term(iTRAQ4plex), M9(Oxidation)                                    | 1947.01114 | 54 | 3.27 | Expt1 |
| EIFEQPSVVTMR                             | 1 | 7305085                                | N-Term(iTRAQ4plex), M13(Oxidation)                                   | 1838.91203 | 54 |      | Expt1 |
| GLTMLDHEQVSPEDPGAQFLIQTGSVGR             | 3 | 9790247                                | N-Term(iTRAQ4plex)                                                   | 3126.56943 | 53 | 4.78 | Expt1 |
| GPSGTVSEAQLAR                            | 1 | 149270772;149270774;153791796          | N-Term(iTRAQ4plex)                                                   | 1416.75664 | 53 |      | Expt1 |
| ETLILLK                                  | 4 | 225543183;30520173                     | N-Term(iTRAQ4plex), K8(iTRAQ4plex)                                   | 1230.82366 | 53 | 3.49 | Expt1 |
| SQNVMAASIANIVK                           | 2 | 110625624                              | N-Term(iTRAQ4plex), K15(iTRAQ4plex)                                  | 1805.02457 | 53 | 4.76 | Expt1 |
| QPEGTGMIDEEFTVAR                         | 2 | 61657921                               | N-Term(iTRAQ4plex), M7(Oxidation)                                    | 1939.92038 | 53 | 3.81 | Expt1 |
| DFVEDDTTHG                               | 1 | 36031035                               | N-Term(iTRAQ4plex)                                                   | 1279.55730 | 53 |      | Expt1 |
| LLDEVFFSEK                               | 2 | 6755196                                | N-Term(iTRAQ4plex), K10(iTRAQ4plex)                                  | 1514.84209 | 53 | 3.66 | Expt1 |
| IQFNESFAEMNR                             | 2 | 6753498                                | N-Term(iTRAQ4plex), M10(Oxidation)                                   | 1645.77995 | 53 |      | Expt1 |
| SYGPIFIETSAK                             | 1 | 149251704;149256045;111154109          | N-Term(iTRAQ4plex), K12(iTRAQ4plex)                                  | 1600.87847 | 53 |      | Expt1 |
| GLLGCNIPLQR                              | 3 | 119508441                              | N-Term(iTRAQ4plex), C5(Methylthio)                                   | 1486.84001 | 53 | 4.00 | Expt1 |
| IDENQLMYLPDSIGGLR                        | 2 | 54607112;54607114                      | N-Term(iTRAQ4plex)                                                   | 2078.07817 | 53 | 3.54 | Expt1 |
| YNLGAPVAGTCYQAEWDDYVPK                   | 3 | 84794552                               | N-Term(iTRAQ4plex), C11(Methylthio), K22(iTRAQ4plex)                 | 2794.31156 | 53 | 3.33 | Expt1 |
| SNDPVAVAFADMLK                           | 2 | 8394460                                | N-Term(iTRAQ4plex), K14(iTRAQ4plex)                                  | 1765.95078 | 53 | 3.69 | Expt1 |
| EFIEGVSQFSVK                             | 2 | 84794597                               | N-Term(iTRAQ4plex), K12(iTRAQ4plex)                                  | 1657.90422 | 53 | 3.78 | Expt1 |
| SPQTPELVEALFR                            | 4 | 126090857                              | N-Term(iTRAQ4plex)                                                   | 1701.93253 | 53 | 3.41 | Expt1 |
| AITAGVVPQSVTECVK                         | 6 | 6754994                                | N-Term(iTRAQ4plex), C14(Methylthio), K16(iTRAQ4plex)                 | 1950.07158 | 53 | 3.10 | Expt1 |
| SPPSGSQSLLEGIMTASSSK                     | 2 | 124486923                              | N-Term(iTRAQ4plex), K20(iTRAQ4plex)                                  | 2252.17984 | 53 | 4.47 | Expt1 |
| EATNDPWPGPSQLMGEIAK                      | 3 | 154240730                              | N-Term(iTRAQ4plex), K20(iTRAQ4plex)                                  | 2404.17020 | 53 | 3.73 | Expt1 |
| ENETSQMPPGR                              | 2 | 27734136                               | N-Term(iTRAQ4plex)                                                   | 1292.60539 | 53 | 3.61 | Expt1 |
| SIWAFGPDATGPNILVDDTLPSEVDK               | 1 | 6755594;158508674                      | N-Term(iTRAQ4plex), K26(iTRAQ4plex)                                  | 3045.57621 | 53 |      | Expt1 |
| TMQNTNDVETAR                             | 2 | 6671684                                | N-Term(iTRAQ4plex), M2(Oxidation)                                    | 1539.72368 | 53 | 2.85 | Expt1 |
| WVPFDGDDIQLFVFR                          | 2 | 46195798                               | N-Term(iTRAQ4plex)                                                   | 1980.00602 | 53 | 3.33 | Expt1 |
| EQSILELGSLLAK                            | 5 | 134053905                              | N-Term(iTRAQ4plex), K13(iTRAQ4plex)                                  | 1689.01189 | 53 | 3.22 | Expt1 |
| ILYSQCQDVMR                              | 3 | 33620739;94363353                      | N-Term(iTRAQ4plex), C6(Methylthio), M10(Oxidation)                   | 1490.69475 | 53 |      | Expt1 |



|                             |    |                                                   |                                                                      |            |    |      |       |
|-----------------------------|----|---------------------------------------------------|----------------------------------------------------------------------|------------|----|------|-------|
| VNAQAAAYEYMAAYIENAK         | 2  | 7304971                                           | N-Term(iTRAQ4plex), K19(iTRAQ4plex)                                  | 2379.19754 | 53 | 4.10 | Expt1 |
| FMNSGQTCVAPDYILCDPSIQNEIVEK | 9  | 163310769                                         | N-Term(iTRAQ4plex), C8(Methylthio), C16(Methylthio), K27(iTRAQ4plex) | 3394.57138 | 53 | 4.32 | Expt1 |
| AFGAPGEAFSEPEEILFANSMGK     | 5  | 130502130                                         | N-Term(iTRAQ4plex), N19(Deamidated), K23(iTRAQ4plex)                 | 2688.33872 | 53 | 6.37 | Expt1 |
| IGASTQAAQR                  | 2  | 117553604                                         | N-Term(iTRAQ4plex)                                                   | 1146.63677 | 53 | 3.48 | Expt1 |
| FLLQDTVELR                  | 3  | 110630015;34486094                                | N-Term(iTRAQ4plex)                                                   | 1377.78874 | 53 | 3.34 | Expt1 |
| ESDTGLAPPALWDLAADK          | 6  | 33859604                                          | N-Term(iTRAQ4plex), K18(iTRAQ4plex)                                  | 2158.12900 | 53 | 3.15 | Expt1 |
| SYEPQEDPGVK                 | 2  | 33859640                                          | N-Term(iTRAQ4plex), K11(iTRAQ4plex)                                  | 1536.78618 | 53 | 3.71 | Expt1 |
| LDEGVVPLETMK                | 4  | 6678143                                           | N-Term(iTRAQ4plex), K13(iTRAQ4plex)                                  | 1819.00041 | 53 | 3.41 | Expt1 |
| SEAAAGDDGSQQQPAEPR          | 2  | 149250584;149250622;244790087;244790095;244790091 | N-Term(iTRAQ4plex)                                                   | 1957.90006 | 53 | 2.84 | Expt1 |
| DMILLPEMVGSMVGVYNGK         | 5  | 6677799;94377390                                  | N-Term(iTRAQ4plex), M8(Oxidation), N17(Deamidated), K19(iTRAQ4plex)  | 2358.19773 | 53 | 3.83 | Expt1 |
| SSAYESLMEIVK                | 1  | 88014720                                          | N-Term(iTRAQ4plex), K12(iTRAQ4plex)                                  | 1644.88016 | 53 |      | Expt1 |
| DYELQTMTYR                  | 2  | 111154082;111154076                               | N-Term(iTRAQ4plex)                                                   | 1463.69560 | 53 | 3.64 | Expt1 |
| WQASSLPADDLCTENAIMLK        | 1  | 134288917                                         | N-Term(iTRAQ4plex), C12(Methylthio), K20(iTRAQ4plex)                 | 2540.24778 | 53 |      | Expt1 |
| NAIDDDGCVVPGAGAVEVALAEALIK  | 2  | 6753324                                           | N-Term(iTRAQ4plex), C7(Methylthio), K25(iTRAQ4plex)                  | 2729.44992 | 53 | 2.92 | Expt1 |
| NDATAQFLAEASVMTQLR          | 2  | 31560712                                          | N-Term(iTRAQ4plex)                                                   | 2181.11789 | 53 | 3.67 | Expt1 |
| GSQAQPDSPSAQLLIAASQSFQPGGK  | 2  | 227116327                                         | N-Term(iTRAQ4plex), K28(iTRAQ4plex)                                  | 3042.61484 | 53 | 4.31 | Expt1 |
| GHNGVWTQIATTPQFPDMILSASR    | 2  | 6680047                                           | N-Term(iTRAQ4plex), N3(Deamidated)                                   | 2772.39328 | 53 | 3.89 | Expt1 |
| EYVMGNVIQGGEGQAPTR          | 1  | 21450129                                          | N-Term(iTRAQ4plex), M4(Oxidation)                                    | 2066.01714 | 53 |      | Expt1 |
| GESVMVPTLSEEEK              | 1  | 6671549                                           | N-Term(iTRAQ4plex), M5(Oxidation), K16(iTRAQ4plex)                   | 2009.03757 | 53 |      | Expt1 |
| EANNLWPFK                   | 2  | 31981515;82957238                                 | N-Term(iTRAQ4plex), K10(iTRAQ4plex)                                  | 1553.84429 | 53 | 2.89 | Expt1 |
| FMEQVIFK                    | 4  | 23956222                                          | N-Term(iTRAQ4plex), K8(iTRAQ4plex)                                   | 1329.75286 | 53 | 3.23 | Expt1 |
| ASSAGVLVS                   | 1  | 31981577                                          | N-Term(iTRAQ4plex)                                                   | 934.53302  | 53 |      | Expt1 |
| DNPEATQQMNDLIIGK            | 1  | 237820660                                         | N-Term(iTRAQ4plex), K16(iTRAQ4plex)                                  | 2075.07199 | 53 |      | Expt1 |
| FVCSFDEVMQTLDEGK            | 2  | 61657921                                          | N-Term(iTRAQ4plex), C3(Methylthio), K16(iTRAQ4plex)                  | 2118.96538 | 52 | 2.98 | Expt1 |
| GLGTEVPGNFQGGPDPYR          | 2  | 31982159                                          | N-Term(iTRAQ4plex)                                                   | 1947.96526 | 52 | 3.90 | Expt1 |
| INQDPLGIGQR                 | 2  | 168693635                                         | N-Term(iTRAQ4plex)                                                   | 1354.75798 | 52 | 3.37 | Expt1 |
| LTLYTLLEGR                  | 10 | 115647999                                         | N-Term(iTRAQ4plex)                                                   | 1322.78203 | 52 | 2.98 | Expt1 |
| GEGPELDVNMMPK               | 2  | 61743961                                          | N-Term(iTRAQ4plex), K12(iTRAQ4plex)                                  | 1573.81560 | 52 | 3.57 | Expt1 |
| AAALVLQTIWGYK               | 2  | 146219835;146219830;146219849;146231979           | N-Term(iTRAQ4plex), K13(iTRAQ4plex)                                  | 1722.02634 | 52 | 2.99 | Expt1 |
| ASETLLAQ                    | 3  | 160333304                                         | N-Term(iTRAQ4plex)                                                   | 964.50817  | 52 |      | Expt1 |
| NVLITDFFGSVR                | 2  | 29789447;29788753                                 | N-Term(iTRAQ4plex)                                                   | 1511.83684 | 52 | 3.37 | Expt1 |
| ASYISSAQLDQDPGAVAAAAIFR     | 2  | 21703976                                          | N-Term(iTRAQ4plex)                                                   | 2563.33500 | 52 | 2.84 | Expt1 |
| FMELLEPLSER                 | 1  | 117938332;117938334                               | N-Term(iTRAQ4plex)                                                   | 1507.80022 | 52 |      | Expt1 |
| YGVVCEADTGR                 | 4  | 29244556                                          | N-Term(iTRAQ4plex), C6(Methylthio)                                   | 1458.68645 | 52 | 3.15 | Expt1 |
| TVEEAENIVTTGVVVR            | 2  | 6755592                                           | N-Term(iTRAQ4plex)                                                   | 1860.03166 | 52 | 4.20 | Expt1 |
| EGAFSNFPISEETVK             | 2  | 72384374                                          | N-Term(iTRAQ4plex), K15(iTRAQ4plex)                                  | 1942.99883 | 52 | 3.78 | Expt1 |
| NAVFLQLEALSSNK              | 2  | 27370032                                          | N-Term(iTRAQ4plex), K14(iTRAQ4plex)                                  | 1838.00022 | 52 | 4.60 | Expt1 |
| GPSLQGLDLAVSGDIK            | 2  | 61743961                                          | N-Term(iTRAQ4plex), K15(iTRAQ4plex)                                  | 1744.97422 | 52 | 3.42 | Expt1 |
| VGEATETALTCLVEK             | 2  | 6806903;158635979;31542159;254039660;254039658    | N-Term(iTRAQ4plex), C11(Methylthio), K15(iTRAQ4plex)                 | 1897.98667 | 52 | 5.01 | Expt1 |
| WQTVLPVTQK                  | 2  | 158517895                                         | N-Term(iTRAQ4plex), K10(iTRAQ4plex)                                  | 1487.88359 | 52 | 3.48 | Expt1 |
| DSPDLLLLLR                  | 2  | 165377251                                         | N-Term(iTRAQ4plex)                                                   | 1298.78130 | 52 | 3.27 | Expt1 |
| GFGGIGGILR                  | 4  | 124286826                                         | N-Term(iTRAQ4plex)                                                   | 1090.65203 | 52 | 3.30 | Expt1 |
| ATAGSYISSLR                 | 2  | 158303322                                         | N-Term(iTRAQ4plex)                                                   | 1269.69231 | 52 | 4.12 | Expt1 |
| DMGLQELAEQLQTTK             | 1  | 165377185                                         | N-Term(iTRAQ4plex), K15(iTRAQ4plex)                                  | 1993.05191 | 52 |      | Expt1 |
| MFTQQQPQELAR                | 2  | 123701966                                         | N-Term(iTRAQ4plex)                                                   | 1620.83074 | 52 | 4.32 | Expt1 |
| GSNTCELVFEDCK               | 1  | 9789985                                           | N-Term(iTRAQ4plex), C5(Methylthio), C12(Methylthio), K13(iTRAQ4plex) | 1824.78301 | 52 |      | Expt1 |
| TGDLGDINAEQLPGR             | 1  | 114431250                                         | N-Term(iTRAQ4plex)                                                   | 1699.87554 | 52 |      | Expt1 |
| LAATNALLNSLEFTK             | 4  | 88014720                                          | N-Term(iTRAQ4plex), K15(iTRAQ4plex)                                  | 1894.10025 | 52 | 4.44 | Expt1 |
| MVTGDNINTAR                 | 2  | 56699478;62234487;80861454                        | N-Term(iTRAQ4plex)                                                   | 1335.68144 | 52 | 3.41 | Expt1 |
| FVNLGIEPPK                  | 2  | 33859604                                          | N-Term(iTRAQ4plex), K10(iTRAQ4plex)                                  | 1401.84355 | 52 | 3.22 | Expt1 |
| ISMPDFDLNLK                 | 1  | 61743961                                          | N-Term(iTRAQ4plex), M3(Oxidation), K11(iTRAQ4plex)                   | 1596.86504 | 52 |      | Expt1 |

|                           |   |                                       |                                                                     |            |    |      |       |
|---------------------------|---|---------------------------------------|---------------------------------------------------------------------|------------|----|------|-------|
| VLLMELEEAR                | 1 | 149243283                             | N-Term(iTRAQ4plex)                                                  | 1346.74870 | 52 |      | Expt1 |
| LLESLDQLELR               | 3 | 21703784                              | N-Term(iTRAQ4plex)                                                  | 1472.84770 | 52 | 3.62 | Expt1 |
| TQYSSAMLESLLPGIR          | 4 | 68226731                              | N-Term(iTRAQ4plex)                                                  | 1910.02056 | 52 | 3.62 | Expt1 |
| FVAPEEVLPFTEGDILEK        | 3 | 21703888                              | N-Term(iTRAQ4plex), K18(iTRAQ4plex)                                 | 2321.25656 | 52 | 3.23 | Expt1 |
| VCLIGCGFSTGYGSAVK         | 2 | 6724311                               | N-Term(iTRAQ4plex), C2(Methylthio), C6(Methylthio), K17(iTRAQ4plex) | 2041.98667 | 52 | 3.46 | Expt1 |
| TDAVDSVVR                 | 4 | 77404392                              | N-Term(iTRAQ4plex)                                                  | 1105.59514 | 52 | 2.98 | Expt1 |
| TIQEADQDGDSDAISFTFVK      | 2 | 149249669                             | N-Term(iTRAQ4plex), K20(iTRAQ4plex)                                 | 2489.22489 | 52 | 2.95 | Expt1 |
| LQVAGEITTGPR              | 2 | 27369581;7657583                      | N-Term(iTRAQ4plex)                                                  | 1385.78887 | 52 | 3.18 | Expt1 |
| NDLGVGYLLGLDNDSAK         | 2 | 125628659                             | N-Term(iTRAQ4plex), K17(iTRAQ4plex)                                 | 2052.09739 | 52 | 3.97 | Expt1 |
| VDFLQLMINSQNYK            | 2 | 6681115                               | N-Term(iTRAQ4plex), K14(iTRAQ4plex)                                 | 2001.08146 | 52 | 3.84 | Expt1 |
| TAMNVNEIFMAIAK            | 3 | 113866024                             | N-Term(iTRAQ4plex), M10(Oxidation), K14(iTRAQ4plex)                 | 1856.99668 | 52 | 3.66 | Expt1 |
| GSTDNLMDIIR               | 2 | 126723461                             | N-Term(iTRAQ4plex), M7(Oxidation)                                   | 1525.69512 | 51 | 3.16 | Expt1 |
| CPTGYLLNEDTR              | 5 | 118197277                             | N-Term(iTRAQ4plex), C1(Methylthio)                                  | 1621.70928 | 51 | 2.97 | Expt1 |
| SPLAQMEER                 | 4 | 28173550                              | N-Term(iTRAQ4plex)                                                  | 1333.65459 | 51 | 2.90 | Expt1 |
| IGGMEGPFGGGMENGR          | 2 | 21313308;158186704                    | N-Term(iTRAQ4plex)                                                  | 1840.82976 | 51 | 3.48 | Expt1 |
| GSLGTSGETCR               | 3 | 183979966                             | N-Term(iTRAQ4plex), C10(Methylthio)                                 | 1257.56902 | 51 | 3.17 | Expt1 |
| ALQLGLTFSPAALK            | 4 | 31981810                              | N-Term(iTRAQ4plex), K15(iTRAQ4plex)                                 | 1847.09781 | 51 | 3.44 | Expt1 |
| FATASADGQIFDYDGK          | 2 | 6755995                               | N-Term(iTRAQ4plex), K16(iTRAQ4plex)                                 | 1992.03531 | 51 | 3.66 | Expt1 |
| ENPLLPPEEEQR              | 2 | 110630015;34486094                    | N-Term(iTRAQ4plex)                                                  | 1626.81401 | 51 | 3.00 | Expt1 |
| VFSYAGLSDDPDGPAHVVTVIAR   | 4 | 21311891                              | N-Term(iTRAQ4plex)                                                  | 2817.46506 | 51 | 4.78 | Expt1 |
| YSYMEVIMPEK               | 2 | 164518893                             | N-Term(iTRAQ4plex), K11(iTRAQ4plex)                                 | 1677.85283 | 51 | 3.09 | Expt1 |
| EDAVLYLLEIPK              | 1 | 160333863                             | N-Term(iTRAQ4plex), K12(iTRAQ4plex)                                 | 1691.00041 | 51 |      | Expt1 |
| LFPDDSLPVSRR              | 1 | 148222073;147898671                   | N-Term(iTRAQ4plex)                                                  | 1670.89531 | 51 |      | Expt1 |
| LLQFDLTGIESMEQCR          | 2 | 158533976                             | N-Term(iTRAQ4plex), C16(Methylthio)                                 | 2201.06101 | 51 | 4.05 | Expt1 |
| LNLLEEFQQLYVK             | 1 | 6755983                               | N-Term(iTRAQ4plex), K12(iTRAQ4plex)                                 | 1812.02286 | 51 |      | Expt1 |
| VSEGGPAEIAGLQIGDK         | 2 | 149249414;149250447                   | N-Term(iTRAQ4plex), K17(iTRAQ4plex)                                 | 1929.05655 | 51 | 4.93 | Expt1 |
| NYPATFWVNPQFK             | 5 | 160333229                             | N-Term(iTRAQ4plex), K13(iTRAQ4plex)                                 | 1900.00249 | 51 | 3.79 | Expt1 |
| LLSDLCGTVMSTNDVEK         | 1 | 110625656;270309161                   | N-Term(iTRAQ4plex), C6(Methylthio), M10(Oxidation), K17(iTRAQ4plex) | 2175.06314 | 51 |      | Expt1 |
| VPEPSPATALPYPSLEATGLPSVVR | 1 | 29244484                              | N-Term(iTRAQ4plex)                                                  | 2789.53232 | 51 |      | Expt1 |
| VWGNVGTVEWADPIEDPDPPEVMAK | 2 | 114145493;29788787                    | N-Term(iTRAQ4plex), K24(iTRAQ4plex)                                 | 2942.45011 | 51 | 4.04 | Expt1 |
| ISYPDLEEVTQLDTER          | 2 | 227497222;21281687                    | N-Term(iTRAQ4plex)                                                  | 2167.06304 | 51 | 3.61 | Expt1 |
| VDLQEINNWWQAQMK           | 1 | 117606335                             | N-Term(iTRAQ4plex), K15(iTRAQ4plex)                                 | 2104.11600 | 51 |      | Expt1 |
| YEILTPNAIPK               | 2 | 29336026;33598964                     | N-Term(iTRAQ4plex), K11(iTRAQ4plex)                                 | 1546.91631 | 51 | 3.76 | Expt1 |
| NAFYIGSYQCINEAQR          | 2 | 10946972                              | N-Term(iTRAQ4plex), C11(Methylthio)                                 | 2195.01505 | 51 | 3.56 | Expt1 |
| VEVESGGSAAATPPLSR         | 1 | 75750501                              | N-Term(iTRAQ4plex)                                                  | 1771.93230 | 51 |      | Expt1 |
| IVTSEEVIIR                | 3 | 153945724                             | N-Term(iTRAQ4plex)                                                  | 1302.77788 | 51 | 3.19 | Expt1 |
| NLGSINTELQDVQR            | 2 | 6755448                               | N-Term(iTRAQ4plex)                                                  | 1730.91753 | 51 | 2.90 | Expt1 |
| QEVENLNVEYR               | 2 | 110735428;110735426                   | N-Term(iTRAQ4plex)                                                  | 1665.82244 | 51 | 4.14 | Expt1 |
| TYESELEADAR               | 3 | 113195686                             | N-Term(iTRAQ4plex)                                                  | 1411.72148 | 51 | 3.63 | Expt1 |
| VSPQDANSLMANGTLTR         | 1 | 146219835;146219830;146231979         | N-Term(iTRAQ4plex), N12(Deamidated)                                 | 1919.95525 | 51 |      | Expt1 |
| AEEPGGQAYETPR             | 2 | 237681204;33636693                    | N-Term(iTRAQ4plex)                                                  | 1548.74700 | 51 | 3.68 | Expt1 |
| ILDELTCLK                 | 1 | 145966692;13386238;160333504          | N-Term(iTRAQ4plex), C8(Methylthio), K9(iTRAQ4plex)                  | 1381.76616 | 51 |      | Expt1 |
| ILILGLDGAGK               | 1 | 153792526                             | N-Term(iTRAQ4plex), K11(iTRAQ4plex)                                 | 1357.87468 | 51 |      | Expt1 |
| AVNSATGVPTV               | 2 | 31560656                              | N-Term(iTRAQ4plex)                                                  | 1159.64617 | 51 |      | Expt1 |
| EPNPPIDEVINTPGVVAR        | 3 | 31543047                              | N-Term(iTRAQ4plex)                                                  | 2061.11308 | 51 | 3.01 | Expt1 |
| FYPDPDPSQLTEDITR          | 2 | 157041260                             | N-Term(iTRAQ4plex)                                                  | 1922.96831 | 51 | 2.87 | Expt1 |
| GVLEQQWQADSTTR            | 2 | 114158691                             | N-Term(iTRAQ4plex)                                                  | 1691.85124 | 51 |      | Expt1 |
| DAEEVISQITIDTIVDMIK       | 2 | 6753484                               | N-Term(iTRAQ4plex), K18(iTRAQ4plex)                                 | 2308.22586 | 51 | 2.99 | Expt1 |
| ETLLDTELASAAAGTSLR        | 2 | 227116320                             | N-Term(iTRAQ4plex)                                                  | 1963.04551 | 51 | 3.73 | Expt1 |
| SGGMSNELNIIISR            | 2 | 29293809                              | N-Term(iTRAQ4plex)                                                  | 1635.82732 | 51 | 3.51 | Expt1 |
| MNVLADALK                 | 1 | 24762230;94388628;149261725;149270415 | N-Term(iTRAQ4plex), K9(iTRAQ4plex)                                  | 1262.72852 | 51 |      | Expt1 |
| EFAPSDEELDSYR             | 1 | 149252052                             | N-Term(iTRAQ4plex)                                                  | 1701.77861 | 51 |      | Expt1 |

|                          |    |                                         |                                                      |            |    |      |       |
|--------------------------|----|-----------------------------------------|------------------------------------------------------|------------|----|------|-------|
| IIVIMDSYSGSDLVER         | 1  | 31560705                                | N-Term(iTRAQ4plex)                                   | 1853.98185 | 51 |      | Expt1 |
| QTLQSEQPLQVAR            | 2  | 33859604                                | N-Term(iTRAQ4plex)                                   | 1641.90434 | 51 | 3.29 | Expt1 |
| LFIGGLNTEETNEK           | 2  | 6755296;83699420                        | N-Term(iTRAQ4plex), K13(iTRAQ4plex)                  | 1723.95354 | 51 | 2.90 | Expt1 |
| ELETVDFK                 | 1  | 6678103                                 | N-Term(iTRAQ4plex), K8(iTRAQ4plex)                   | 1268.69341 | 51 |      | Expt1 |
| FEAAETLEEAAMR            | 2  | 149263727;131412198;131412207;131412178 | N-Term(iTRAQ4plex)                                   | 1611.78545 | 51 | 3.66 | Expt1 |
| EGIECEVINLR              | 2  | 18152793                                | N-Term(iTRAQ4plex), C5(Methylthio)                   | 1464.73430 | 50 | 4.04 | Expt1 |
| NEPQNAAGAPGR             | 2  | 113866024                               | N-Term(iTRAQ4plex)                                   | 1325.67314 | 50 | 3.29 | Expt1 |
| ESYVETELIFALAK           | 1  | 51491845                                | N-Term(iTRAQ4plex), K14(iTRAQ4plex)                  | 1901.06064 | 50 |      | Expt1 |
| TPMENIGLQDSLLSR          | 2  | 33859484                                | N-Term(iTRAQ4plex)                                   | 1817.95598 | 50 | 3.82 | Expt1 |
| VWQVTIGTR                | 3  | 6680047                                 | N-Term(iTRAQ4plex)                                   | 1203.69939 | 50 | 3.14 | Expt1 |
| VPFLVLECPNLK             | 2  | 13384930                                | N-Term(iTRAQ4plex), C8(Methylthio), K12(iTRAQ4plex)  | 1705.96323 | 50 |      | Expt1 |
| AMGPLVLTVEVLFDEK         | 2  | 149261435                               | N-Term(iTRAQ4plex), K15(iTRAQ4plex)                  | 1950.09354 | 50 | 3.69 | Expt1 |
| DPEAPLVVPLGR             | 6  | 115647999                               | N-Term(iTRAQ4plex)                                   | 1406.81377 | 50 | 3.15 | Expt1 |
| GTVLLSGPR                | 13 | 83699424                                | N-Term(iTRAQ4plex)                                   | 1043.63323 | 50 | 3.24 | Expt1 |
| LALDMEISAYR              | 4  | 188219589;113195686                     | N-Term(iTRAQ4plex), M5(Oxidation)                    | 1441.75017 | 50 | 2.92 | Expt1 |
| VLTPELYAELR              | 1  | 10946574                                | N-Term(iTRAQ4plex)                                   | 1447.83208 | 50 |      | Expt1 |
| NLQYYDISAK               | 2  | 149260287;124487358                     | N-Term(iTRAQ4plex), K10(iTRAQ4plex)                  | 1502.80876 | 50 | 3.96 | Expt1 |
| TEEMVQTEEMETPR           | 2  | 157952206;284507286                     | N-Term(iTRAQ4plex)                                   | 1853.83953 | 50 | 3.60 | Expt1 |
| WSEPNEEELVK              | 2  | 46048490                                | N-Term(iTRAQ4plex), K11(iTRAQ4plex)                  | 1647.84905 | 50 | 3.83 | Expt1 |
| LDAQASFLSEELAAQTIK       | 2  | 124249351                               | N-Term(iTRAQ4plex), K18(iTRAQ4plex)                  | 2223.22080 | 50 | 4.67 | Expt1 |
| EYVEGEVTELTPCETENPMGGYGK | 2  | 9790083                                 | N-Term(iTRAQ4plex), C13(Methylthio), K24(iTRAQ4plex) | 2966.34061 | 50 | 3.45 | Expt1 |
| MPFLSISSPK               | 1  | 61743961                                | N-Term(iTRAQ4plex), K10(iTRAQ4plex)                  | 1394.80437 | 50 |      | Expt1 |
| DVYVQDLMETDLYK           | 2  | 21489933;6754632                        | N-Term(iTRAQ4plex), M9(Oxidation), K15(iTRAQ4plex)   | 2149.10300 | 50 | 3.06 | Expt1 |
| EANGITSEVLDGLNPIQTDLGR   | 6  | 226423935                               | N-Term(iTRAQ4plex), N3(Deamidated)                   | 2457.26584 | 50 | 5.28 | Expt1 |
| DFLLGAYQTEFPEGPTQLMK     | 2  | 31982393                                | N-Term(iTRAQ4plex), K21(iTRAQ4plex)                  | 2702.37247 | 50 | 3.65 | Expt1 |
| LLVPLYLIEAVR             | 4  | 111038118                               | N-Term(iTRAQ4plex)                                   | 1429.89421 | 50 | 3.60 | Expt1 |
| TVLQIDNSVASALEGINR       | 1  | 13385500                                | N-Term(iTRAQ4plex)                                   | 2044.11985 | 50 |      | Expt1 |
| GAVDAAVPTNIIAAK          | 2  | 31981588                                | N-Term(iTRAQ4plex), K15(iTRAQ4plex)                  | 1699.00200 | 50 | 3.30 | Expt1 |
| MSGIDATTALSVGAPDVTLK     | 2  | 61743961                                | N-Term(iTRAQ4plex), M1(Oxidation), K20(iTRAQ4plex)   | 2251.22000 | 50 | 4.12 | Expt1 |
| VFTAIAIQPWAQR            | 2  | 134053913                               | N-Term(iTRAQ4plex)                                   | 1646.88310 | 50 | 3.15 | Expt1 |
| EIVVLETLLEDIDK           | 1  | 6677691                                 | N-Term(iTRAQ4plex), K13(iTRAQ4plex)                  | 1804.02427 | 50 |      | Expt1 |
| LEEVDADDYDNR             | 6  | 160333229                               | N-Term(iTRAQ4plex)                                   | 1712.73870 | 50 | 4.20 | Expt1 |
| SLSQNYGVVK               | 2  | 148747558                               | N-Term(iTRAQ4plex), K10(iTRAQ4plex)                  | 1396.80828 | 50 | 3.57 | Expt1 |
| LENEIQTYR                | 11 | 112983636                               | N-Term(iTRAQ4plex)                                   | 1309.68799 | 50 | 3.76 | Expt1 |
| LTTDFNVIVQALSK           | 2  | 6678143                                 | N-Term(iTRAQ4plex), K14(iTRAQ4plex)                  | 1837.07846 | 50 | 3.38 | Expt1 |
| CEPIVMTVPR               | 2  | 6753494                                 | N-Term(iTRAQ4plex), C1(Methylthio)                   | 1334.67497 | 50 | 2.86 | Expt1 |
| DGSDYEGWCWPGSASYPDFTNPR  | 6  | 6679891                                 | N-Term(iTRAQ4plex), C9(Methylthio)                   | 2797.14933 | 50 | 3.53 | Expt1 |
| AAPSAQEALAR              | 2  | 149250564                               | N-Term(iTRAQ4plex)                                   | 1228.67742 | 50 | 3.05 | Expt1 |
| TTSGATPAAIR              | 8  | 110227377                               | N-Term(iTRAQ4plex)                                   | 1189.66741 | 50 | 3.63 | Expt1 |
| DVDAAYMNMK               | 1  | 20911031;54607171;47523977;269914154    | N-Term(iTRAQ4plex), M7(Oxidation), K9(iTRAQ4plex)    | 1330.65996 | 50 |      | Expt1 |
| TCLLSIYTTNK              | 4  | 6753364                                 | N-Term(iTRAQ4plex), C2(Methylthio), K11(iTRAQ4plex)  | 1590.85393 | 50 | 2.87 | Expt1 |
| NYILDQTNVYGSQAR          | 2  | 21450323                                | N-Term(iTRAQ4plex)                                   | 1885.95169 | 50 | 3.72 | Expt1 |
| SDGTLNPNQVGR             | 2  | 21313520                                | N-Term(iTRAQ4plex), N8(Deamidated)                   | 1274.64775 | 50 | 2.99 | Expt1 |
| FLFSLFGQK                | 2  | 22122695;288541337                      | N-Term(iTRAQ4plex), K9(iTRAQ4plex)                   | 1374.81377 | 50 | 2.94 | Expt1 |
| SLLDACEGR                | 3  | 117938332;117938334                     | N-Term(iTRAQ4plex), C6(Methylthio)                   | 1153.54949 | 50 |      | Expt1 |
| AFALYSEDEGVLR            | 2  | 84370361                                | N-Term(iTRAQ4plex)                                   | 1613.83452 | 50 | 3.51 | Expt1 |
| TQPGVVDASPGQR            | 4  | 158711721                               | N-Term(iTRAQ4plex)                                   | 1455.76787 | 50 | 3.22 | Expt1 |
| DMANPTALLLSAVMMLR        | 2  | 18250284                                | N-Term(iTRAQ4plex), M2(Oxidation), M15(Oxidation)    | 2023.05851 | 50 |      | Expt1 |
| LIITPETPEPEAQPVGQSR      | 3  | 31712006                                | N-Term(iTRAQ4plex)                                   | 2303.24668 | 50 | 3.65 | Expt1 |
| ATFDISLVVPK              | 3  | 68226731                                | N-Term(iTRAQ4plex), K11(iTRAQ4plex)                  | 1477.89067 | 50 | 3.28 | Expt1 |
| TSYTNLDGR                | 7  | 110626070                               | N-Term(iTRAQ4plex)                                   | 1170.58794 | 50 | 3.24 | Expt1 |
| TPCQQLDQVLER             | 3  | 31982260                                | N-Term(iTRAQ4plex), C3(Methylthio)                   | 1748.84722 | 50 |      | Expt1 |
| SNVFTVVTR                | 2  | 145966915                               | N-Term(iTRAQ4plex)                                   | 1166.66570 | 50 | 2.85 | Expt1 |
| SLSGPGQ                  | 3  | 9790141                                 | N-Term(iTRAQ4plex)                                   | 789.42620  | 50 |      | Expt1 |

|                                 |   |                                                                               |                                                                      |            |    |      |       |
|---------------------------------|---|-------------------------------------------------------------------------------|----------------------------------------------------------------------|------------|----|------|-------|
| ISSLLEEQFQQGK                   | 3 | 149257598;149250154;82922494;28491531;94387984;149264053                      | N-Term(iTRAQ4plex), K13(iTRAQ4plex)                                  | 1794.99057 | 50 | 3.02 | Expt1 |
| EGLISQDGSSEALLR                 | 5 | 6755314                                                                       | N-Term(iTRAQ4plex)                                                   | 1831.99199 | 50 | 3.06 | Expt1 |
| MYFPDVEFDIK                     | 2 | 61743961                                                                      | N-Term(iTRAQ4plex), M1(Oxidation), K11(iTRAQ4plex)                   | 1707.86138 | 50 | 2.83 | Expt1 |
| AVDVFPPPEAQNDFPVAMQISEK         | 1 | 51491845                                                                      | N-Term(iTRAQ4plex), K23(iTRAQ4plex)                                  | 2867.45469 | 50 |      | Expt1 |
| SSVAVPYVIVPLK                   | 3 | 126518317                                                                     | N-Term(iTRAQ4plex), K13(iTRAQ4plex)                                  | 1660.03397 | 50 | 3.59 | Expt1 |
| STLINSFLFTLDLYSPEYPGPSHR        | 2 | 28173550                                                                      | N-Term(iTRAQ4plex)                                                   | 2751.41654 | 50 | 4.83 | Expt1 |
| AVASQLDCNFK                     | 2 | 27754103                                                                      | N-Term(iTRAQ4plex), C8(Methylthio), K12(iTRAQ4plex)                  | 1642.85552 | 50 | 3.04 | Expt1 |
| TLYLQSVTSIEER                   | 2 | 162135936;162287057                                                           | N-Term(iTRAQ4plex)                                                   | 1682.91118 | 50 | 3.34 | Expt1 |
| DSLGDFlEHYAQLGPSSPEQLAAGAEEGGPR | 3 | 6755252                                                                       | N-Term(iTRAQ4plex)                                                   | 3399.62949 | 50 | 3.02 | Expt1 |
| ISLPVILMDETLK                   | 1 | 6806903;158635979                                                             | N-Term(iTRAQ4plex), K13(iTRAQ4plex)                                  | 1760.05547 | 50 |      | Expt1 |
| VADGLPLAASMQEDEQSGR             | 1 | 6755448                                                                       | N-Term(iTRAQ4plex), M11(Oxidation)                                   | 2134.02408 | 50 |      | Expt1 |
| AMGSQVLVDCSTLTSK                | 3 | 31560359                                                                      | N-Term(iTRAQ4plex), M2(Oxidation), C10(Methylthio), K16(iTRAQ4plex)  | 1989.99222 | 50 | 3.19 | Expt1 |
| GEIDASVPMEADLR                  | 1 | 61743961                                                                      | N-Term(iTRAQ4plex), M10(Oxidation)                                   | 1791.86125 | 50 |      | Expt1 |
| LQSEIEMAATETR                   | 1 | 112421039                                                                     | N-Term(iTRAQ4plex), M7(Oxidation)                                    | 1638.81755 | 50 |      | Expt1 |
| LNPQEYLSTACR                    | 1 | 166235123;37718972;166235125;112421097                                        | N-Term(iTRAQ4plex), C12(Methylthio)                                  | 1685.81377 | 50 |      | Expt1 |
| GEVPCTVTTASPLDDAVLSELK          | 3 | 149251053                                                                     | N-Term(iTRAQ4plex), C5(Methylthio), K22(iTRAQ4plex)                  | 2579.32285 | 50 | 3.95 | Expt1 |
| ESCLEAYTGIVQGLK                 | 2 | 88014720                                                                      | N-Term(iTRAQ4plex), C3(Methylthio), K15(iTRAQ4plex)                  | 1945.00614 | 50 | 3.81 | Expt1 |
| SVSAFAPICNPVLCSWGK              | 3 | 13937355                                                                      | N-Term(iTRAQ4plex), C9(Methylthio), C14(Methylthio), K18(iTRAQ4plex) | 2259.10105 | 50 | 3.76 | Expt1 |
| LEGGSGGDSEVQR                   | 2 | 7110703                                                                       | N-Term(iTRAQ4plex)                                                   | 1434.69292 | 50 | 3.10 | Expt1 |
| MTLADDVTLDDLIMAK                | 1 | 6679501                                                                       | N-Term(iTRAQ4plex), K16(iTRAQ4plex)                                  | 2053.08542 | 50 |      | Expt1 |
| VSLEIISGCTK                     | 1 | 9055242;21313156                                                              | N-Term(iTRAQ4plex), C10(Methylthio), K12(iTRAQ4plex)                 | 1662.83647 | 50 |      | Expt1 |
| TGTLTTNQMSVCR                   | 2 | 6806903;158635979;31542159;254039660;254039658                                | N-Term(iTRAQ4plex), C12(Methylthio)                                  | 1601.76140 | 50 | 3.85 | Expt1 |
| FVVDLSQVAPTDIEEGMR              | 2 | 33859604                                                                      | N-Term(iTRAQ4plex), M18(Oxidation)                                   | 2281.12516 | 50 | 3.50 | Expt1 |
| ALDIAENMPGLMR                   | 2 | 149267883;262263372                                                           | N-Term(iTRAQ4plex), M9(Oxidation), M13(Oxidation)                    | 1735.84861 | 50 |      | Expt1 |
| SINDNIAIFTDVQK                  | 2 | 62526118                                                                      | N-Term(iTRAQ4plex), K14(iTRAQ4plex)                                  | 1866.02506 | 50 | 3.92 | Expt1 |
| GYLQEDGR                        | 2 | 118197277                                                                     | N-Term(iTRAQ4plex)                                                   | 1194.62432 | 49 | 2.96 | Expt1 |
| EANLAAAFGKPINF                  | 2 | 31982856                                                                      | N-Term(iTRAQ4plex), K10(iTRAQ4plex)                                  | 1750.97934 | 49 | 3.27 | Expt1 |
| SPDDELLYLVR                     | 2 | 189083804;189083806;6755883;189083811;189083815;189083819;189083808;189083813 | N-Term(iTRAQ4plex)                                                   | 1560.84258 | 49 | 3.47 | Expt1 |
| TIPNDPGFVVTLNSNR                | 2 | 154146209                                                                     | N-Term(iTRAQ4plex)                                                   | 1773.96311 | 49 | 3.79 | Expt1 |
| AEEQEPELTSTPNFVVEVTK            | 2 | 112181167                                                                     | N-Term(iTRAQ4plex), K20(iTRAQ4plex)                                  | 2535.31107 | 49 | 3.67 | Expt1 |
| DYEPPSLSSAPCAPPPPPQR            | 3 | 145587092                                                                     | N-Term(iTRAQ4plex), C12(Methylthio)                                  | 2296.09842 | 49 | 3.43 | Expt1 |
| AANNGALPPDLSYIVR                | 2 | 13385006                                                                      | N-Term(iTRAQ4plex), N4(Deamidated)                                   | 1815.97807 | 49 | 2.94 | Expt1 |
| GIIPLENLSIR                     | 2 | 162951835;162951840;31543516;162951837;6755186                                | N-Term(iTRAQ4plex)                                                   | 1368.83660 | 49 |      | Expt1 |
| ALDLFSDNAPPELLEIINEDIAK         | 2 | 149262992;58037267                                                            | N-Term(iTRAQ4plex), K24(iTRAQ4plex)                                  | 2925.57694 | 49 | 4.19 | Expt1 |
| ESGEGAEAGATAEGAK                | 2 | 6678768                                                                       | N-Term(iTRAQ4plex), K17(iTRAQ4plex)                                  | 1851.88694 | 49 | 3.49 | Expt1 |
| VPVENVLGEVGGGFK                 | 2 | 100817933                                                                     | N-Term(iTRAQ4plex), K15(iTRAQ4plex)                                  | 1789.00888 | 49 | 2.96 | Expt1 |
| DLELLYPFK                       | 2 | 6753762                                                                       | N-Term(iTRAQ4plex), K9(iTRAQ4plex)                                   | 1425.82756 | 49 |      | Expt1 |
| GIEFPMADLDALSPIHTPQR            | 2 | 84875526;84875530;84875524                                                    | N-Term(iTRAQ4plex)                                                   | 2352.22885 | 49 | 3.67 | Expt1 |
| IEVIEIMTDR                      | 2 | 6754220;63652391;82951294;85060507;260304980                                  | N-Term(iTRAQ4plex), M7(Oxidation)                                    | 1378.73894 | 49 |      | Expt1 |
| ISMPDVDLNFK                     | 1 | 61743961                                                                      | N-Term(iTRAQ4plex), M3(Oxidation), K11(iTRAQ4plex)                   | 1582.84795 | 49 |      | Expt1 |
| VATAQDDITGDGTTSNVLIIGELLK       | 1 | 6753324                                                                       | N-Term(iTRAQ4plex), K25(iTRAQ4plex)                                  | 2832.55075 | 49 |      | Expt1 |
| SSLQTMESDVYTEVR                 | 1 | 62526118                                                                      | N-Term(iTRAQ4plex), M6(Oxidation)                                    | 1904.90447 | 49 |      | Expt1 |
| DDFLGQVDVPLYPLPTENPR            | 1 | 56699423                                                                      | N-Term(iTRAQ4plex)                                                   | 2429.25420 | 49 |      | Expt1 |
| IEELQLIVNDK                     | 2 | 7110703                                                                       | N-Term(iTRAQ4plex), K11(iTRAQ4plex)                                  | 1601.94219 | 49 | 3.83 | Expt1 |
| VQPSATLPPDQPQITGLVFR            | 6 | 6755600                                                                       | N-Term(iTRAQ4plex)                                                   | 2421.35996 | 49 | 3.35 | Expt1 |
| CIEEAIK                         | 2 | 149269782;31982332                                                            | N-Term(iTRAQ4plex), C1(Methylthio), K8(iTRAQ4plex)                   | 1254.62651 | 49 | 2.92 | Expt1 |
| ISMPDVLELTK                     | 1 | 61743961                                                                      | N-Term(iTRAQ4plex), M3(Oxidation), K11(iTRAQ4plex)                   | 1563.86077 | 49 |      | Expt1 |

|                                 |   |                                                                   |                                                                                      |            |    |      |      |       |
|---------------------------------|---|-------------------------------------------------------------------|--------------------------------------------------------------------------------------|------------|----|------|------|-------|
| WNDNCPSWNTVDPEVR                | 3 | 157951598                                                         | N-Term(iTRAQ4plex), C5(Methylthio)                                                   | 2121.92851 | 49 | 1.34 | 4.37 | Expt1 |
| IGYNPDTVAFVPIGWNGDNMLEPSANMPWFK | 4 | 126032329                                                         | N-Term(iTRAQ4plex), N20(Deamidated), M21(Oxidation), M28(Oxidation), K32(iTRAQ4plex) | 3888.85508 | 49 |      | 3.62 | Expt1 |
| DLNCVPEIADTLGAVAK               | 2 | 188528624                                                         | N-Term(iTRAQ4plex), C4(Methylthio), K17(iTRAQ4plex)                                  | 2063.07602 | 49 |      | 3.22 | Expt1 |
| AMGNLQIDFADPQR                  | 1 | 94410730;41054806                                                 | N-Term(iTRAQ4plex), M2(Oxidation)                                                    | 1735.85478 | 49 |      |      | Expt1 |
| GEPGSPGENGAPGQMGR               | 1 | 34328108                                                          | N-Term(iTRAQ4plex), N9(Deamidated)                                                   | 1839.83257 | 49 |      |      | Expt1 |
| VLDGIPPPYDK                     | 2 | 31981945                                                          | N-Term(iTRAQ4plex), K11(iTRAQ4plex)                                                  | 1501.86089 | 49 |      | 3.02 | Expt1 |
| IAVYSCPFDFGMITETK               | 2 | 126723461                                                         | N-Term(iTRAQ4plex), C6(Methylthio), K16(iTRAQ4plex)                                  | 2109.03751 | 49 |      | 3.13 | Expt1 |
| LLLPQQAGFGECDR                  | 5 | 160333729                                                         | N-Term(iTRAQ4plex), C12(Methylthio)                                                  | 1736.86174 | 49 |      | 2.95 | Expt1 |
| SMLEVNYPMENGIVR                 | 2 | 22122825                                                          | N-Term(iTRAQ4plex), M2(Oxidation), M9(Oxidation), N11(Deamidated)                    | 1928.92270 | 49 |      |      | Expt1 |
| QMVETELK                        | 2 | 226874906                                                         | N-Term(iTRAQ4plex), K8(iTRAQ4plex)                                                   | 1265.71367 | 49 |      | 3.01 | Expt1 |
| MLDYLQGSGETPQDIR                | 2 | 6679891                                                           | N-Term(iTRAQ4plex), M1(Oxidation)                                                    | 2084.00443 | 49 |      | 3.00 | Expt1 |
| EELSNVLAAMR                     | 2 | 149262233;149249185;14925394;82922589;94385943;51827816;149262863 | N-Term(iTRAQ4plex), M10(Oxidation)                                                   | 1392.72771 | 49 |      |      | Expt1 |
| DLAEDLDYDQVLQK                  | 2 | 31982526                                                          | N-Term(iTRAQ4plex), K14(iTRAQ4plex)                                                  | 1895.01285 | 49 |      | 3.45 | Expt1 |
| GGSGTAGTEPSDIIPLR               | 2 | 6753726                                                           | N-Term(iTRAQ4plex)                                                                   | 1885.01616 | 49 |      | 3.61 | Expt1 |
| SDGSLMFQVPMVEIDGMK              | 4 | 31981724                                                          | N-Term(iTRAQ4plex), K19(iTRAQ4plex)                                                  | 2400.19223 | 49 |      | 4.11 | Expt1 |
| ILYLDYSEIR                      | 2 | 33859650                                                          | N-Term(iTRAQ4plex)                                                                   | 1428.78386 | 49 |      | 2.92 | Expt1 |
| ITLETDEDMVTEIR                  | 1 | 19527174                                                          | N-Term(iTRAQ4plex), M9(Oxidation)                                                    | 1824.90752 | 49 |      |      | Expt1 |
| ELVALMSAIR                      | 2 | 116734870                                                         | N-Term(iTRAQ4plex), M6(Oxidation)                                                    | 1262.72942 | 49 |      |      | Expt1 |
| NTMSLLAANNLLAGLR                | 2 | 17933768                                                          | N-Term(iTRAQ4plex), M3(Oxidation)                                                    | 1832.02402 | 49 |      | 3.85 | Expt1 |
| TMLELLNQLDGFQNTQVK              | 2 | 228008337                                                         | N-Term(iTRAQ4plex), M2(Oxidation), K19(iTRAQ4plex)                                   | 2493.33286 | 49 |      | 3.30 | Expt1 |
| FLYEMGYK                        | 1 | 224922803                                                         | N-Term(iTRAQ4plex), K9(iTRAQ4plex)                                                   | 1501.76885 | 49 |      |      | Expt1 |
| DPVQLNLLYVQAR                   | 2 | 227116327;163310736                                               | N-Term(iTRAQ4plex)                                                                   | 1672.95098 | 49 |      | 3.64 | Expt1 |
| LLGQFTLIGIPPAPR                 | 2 | 162461907                                                         | N-Term(iTRAQ4plex)                                                                   | 1737.05838 | 49 |      |      | Expt1 |
| DGGIPADPNNIFLSTGASDAIVTMLK      | 2 | 33413404                                                          | N-Term(iTRAQ4plex), K26(iTRAQ4plex)                                                  | 2905.52250 | 49 |      | 2.88 | Expt1 |
| TMLELLNQLDGFDSR                 | 4 | 6679501                                                           | N-Term(iTRAQ4plex), M2(Oxidation)                                                    | 1911.96196 | 49 |      | 3.01 | Expt1 |
| NLVGALDEDDGDSPAAR               | 1 | 187173282                                                         | N-Term(iTRAQ4plex)                                                                   | 1858.89739 | 49 |      |      | Expt1 |
| NLPIYSEEIVEMYK                  | 2 | 114326446                                                         | N-Term(iTRAQ4plex), M12(Oxidation), K14(iTRAQ4plex)                                  | 2032.06272 | 49 |      | 4.36 | Expt1 |
| LVQNCWLTLR                      | 6 | 6671684;28395018                                                  | N-Term(iTRAQ4plex), C5(Methylthio)                                                   | 1435.76909 | 49 |      | 3.84 | Expt1 |
| GEISSTQDAMMEEIFR                | 6 | 30519997                                                          | N-Term(iTRAQ4plex), M11(Oxidation)                                                   | 2003.92021 | 49 |      |      | Expt1 |
| FVFSLVDMANGK                    | 2 | 31982186                                                          | N-Term(iTRAQ4plex), M9(Oxidation), N10(Deamidated), K12(iTRAQ4plex)                  | 1632.85869 | 49 |      | 4.06 | Expt1 |
| FIEAGQYNDNLVYGTSVQSVR           | 2 | 118136297                                                         | N-Term(iTRAQ4plex)                                                                   | 2405.19303 | 49 |      | 3.46 | Expt1 |
| YYVTIIDAPGHR                    | 2 | 126032329                                                         | N-Term(iTRAQ4plex)                                                                   | 1548.83164 | 49 |      | 3.82 | Expt1 |
| ISIIDPLTK                       | 1 | 34538607;226453484;167716846;62184378;187373163                   | N-Term(iTRAQ4plex), K10(iTRAQ4plex)                                                  | 1400.89446 | 49 |      |      | Expt1 |
| GLQTSQDAR                       | 1 | 6680836                                                           | N-Term(iTRAQ4plex)                                                                   | 1119.58904 | 49 |      |      | Expt1 |
| IYANFFPYGDASK                   | 1 | 6754240;7949055                                                   | N-Term(iTRAQ4plex), K13(iTRAQ4plex)                                                  | 1780.92082 | 49 |      |      | Expt1 |
| GLSFLFPLLK                      | 2 | 110630015;34486094                                                | N-Term(iTRAQ4plex), K10(iTRAQ4plex)                                                  | 1422.90459 | 49 |      | 3.65 | Expt1 |
| YSEVFEAINITNNEK                 | 2 | 149245220                                                         | N-Term(iTRAQ4plex), K15(iTRAQ4plex)                                                  | 2059.06620 | 49 |      | 3.64 | Expt1 |
| ALEALEPMYDPDTLAGDANAQQELK       | 2 | 75677510                                                          | N-Term(iTRAQ4plex), K26(iTRAQ4plex)                                                  | 3133.56406 | 48 |      | 3.03 | Expt1 |
| GQVFDVGR                        | 3 | 6754632                                                           | N-Term(iTRAQ4plex)                                                                   | 1118.60686 | 48 |      | 2.93 | Expt1 |
| QDEVNAAWQR                      | 2 | 115496850                                                         | N-Term(iTRAQ4plex)                                                                   | 1360.67375 | 48 |      | 3.11 | Expt1 |
| LPFLDIAPLDIGGADQEFR             | 2 | 111120329                                                         | N-Term(iTRAQ4plex)                                                                   | 2231.18682 | 48 |      | 3.09 | Expt1 |
| DTPDEPWAFPAR                    | 2 | 77404392                                                          | N-Term(iTRAQ4plex)                                                                   | 1545.74809 | 48 |      | 3.80 | Expt1 |
| ESSIENIEAVLR                    | 2 | 79750129                                                          | N-Term(iTRAQ4plex)                                                                   | 1503.81243 | 48 |      | 3.06 | Expt1 |
| QVSDLISVLR                      | 5 | 83816893                                                          | N-Term(iTRAQ4plex)                                                                   | 1273.76079 | 48 |      | 2.91 | Expt1 |
| VTDDMYAEQNTENPENPLR             | 1 | 166295181                                                         | N-Term(iTRAQ4plex)                                                                   | 2266.03618 | 48 |      |      | Expt1 |
| ELLAQFSSGLTLPMLK                | 1 | 37537522                                                          | N-Term(iTRAQ4plex), M15(Oxidation), K17(iTRAQ4plex)                                  | 2139.20340 | 48 |      |      | Expt1 |
| VFDWIDANLNEQQIASNTLVR           | 1 | 56699432;56699434                                                 | N-Term(iTRAQ4plex)                                                                   | 2590.34653 | 48 |      |      | Expt1 |
| LFQEPLMLK                       | 2 | 6753558                                                           | N-Term(iTRAQ4plex), K9(iTRAQ4plex)                                                   | 1406.83611 | 48 |      | 3.08 | Expt1 |
| IEGNTLVIPR                      | 2 | 183979966                                                         | N-Term(iTRAQ4plex)                                                                   | 1255.74993 | 48 |      | 3.60 | Expt1 |
| VYVGSIIYELGEDITR                | 2 | 76677895;257196186;257196183                                      | N-Term(iTRAQ4plex)                                                                   | 2021.03611 | 48 |      | 2.96 | Expt1 |

|                             |    |                                                                                                             |                                                                      |            |    |      |       |
|-----------------------------|----|-------------------------------------------------------------------------------------------------------------|----------------------------------------------------------------------|------------|----|------|-------|
| LINIDFTDPDESK               | 1  | 6755152                                                                                                     | N-Term(iTRAQ4plex), K13(iTRAQ4plex)                                  | 1794.94487 | 48 |      | Expt1 |
| DLGEELEALR                  | 4  | 29336026                                                                                                    | N-Term(iTRAQ4plex)                                                   | 1288.68877 | 48 | 3.23 | Expt1 |
| ISMFDVGLNLK                 | 1  | 61743961                                                                                                    | N-Term(iTRAQ4plex), K11(iTRAQ4plex)                                  | 1474.86431 | 48 |      | Expt1 |
| DSEAGSSPTTSTR               | 2  | 76253779                                                                                                    | N-Term(iTRAQ4plex)                                                   | 1540.72344 | 48 | 3.08 | Expt1 |
| MTVCDTNGPGVCQCR             | 1  | 31560359                                                                                                    | N-Term(iTRAQ4plex), C4(Methylthio), C13(Methylthio), C15(Methylthio) | 1922.72698 | 48 |      | Expt1 |
| NTLEWCLPVIDAK               | 1  | 148747410                                                                                                   | N-Term(iTRAQ4plex), C6(Methylthio), K13(iTRAQ4plex)                  | 1835.97502 | 48 |      | Expt1 |
| ELIFOETAR                   | 6  | 21489937                                                                                                    | N-Term(iTRAQ4plex)                                                   | 1250.68633 | 48 | 2.90 | Expt1 |
| ELIFEETAR                   | 3  | 6754632                                                                                                     | N-Term(iTRAQ4plex)                                                   | 1251.67009 | 48 |      | Expt1 |
| TAGPQSQVLCGVMMDR            | 1  | 156255173;7304861;156255171                                                                                 | N-Term(iTRAQ4plex), C10(Methylthio)                                  | 1882.87847 | 48 |      | Expt1 |
| GPSAQPEPDTGVTASTPPDSPQEPLLR | 1  | 11967945                                                                                                    | N-Term(iTRAQ4plex)                                                   | 3001.52726 | 48 |      | Expt1 |
| TLFPYTGNEDELFR              | 2  | 125987599                                                                                                   | N-Term(iTRAQ4plex)                                                   | 2048.01323 | 48 | 2.91 | Expt1 |
| ISASLLDSR                   | 1  | 6754870                                                                                                     | N-Term(iTRAQ4plex)                                                   | 1105.63274 | 48 |      | Expt1 |
| FEIPYFTVSGIQR               | 2  | 160333502;160333508                                                                                         | N-Term(iTRAQ4plex)                                                   | 1799.98789 | 48 | 3.01 | Expt1 |
| DISSSLNSLADSNAR             | 2  | 51491880                                                                                                    | N-Term(iTRAQ4plex)                                                   | 1693.85100 | 48 | 3.49 | Expt1 |
| NLQEILIGAVR                 | 4  | 46560582;6681283                                                                                            | N-Term(iTRAQ4plex)                                                   | 1369.82988 | 48 | 3.71 | Expt1 |
| YDLLCLEGLAR                 | 5  | 31981400                                                                                                    | N-Term(iTRAQ4plex), C5(Methylthio)                                   | 1455.75029 | 48 | 3.09 | Expt1 |
| QLEADILDVNQIFK              | 1  | 19527102                                                                                                    | N-Term(iTRAQ4plex), K14(iTRAQ4plex)                                  | 1934.08701 | 48 |      | Expt1 |
| LANLIEI                     | 2  | 10946680                                                                                                    | N-Term(iTRAQ4plex)                                                   | 929.57958  | 48 |      | Expt1 |
| MAVTFIGNSTAIQELFK           | 1  | 7106439                                                                                                     | N-Term(iTRAQ4plex), M1(Oxidation), K17(iTRAQ4plex)                   | 2174.18479 | 48 |      | Expt1 |
| LLOAFII                     | 3  | 6680554                                                                                                     | N-Term(iTRAQ4plex)                                                   | 961.62438  | 48 |      | Expt1 |
| FDHIMYTGSTAVGK              | 2  | 163310769                                                                                                   | N-Term(iTRAQ4plex), K14(iTRAQ4plex)                                  | 1814.93460 | 48 | 4.85 | Expt1 |
| LQTECELLQR                  | 2  | 23956096                                                                                                    | N-Term(iTRAQ4plex), C6(Methylthio)                                   | 1536.76616 | 48 | 3.21 | Expt1 |
| LIEFSPLR                    | 1  | 30424748                                                                                                    | N-Term(iTRAQ4plex)                                                   | 1118.67192 | 48 |      | Expt1 |
| LQDISSYAK                   | 1  | 82950147;82950149;149264086                                                                                 | N-Term(iTRAQ4plex), K9(iTRAQ4plex)                                   | 1312.74236 | 48 |      | Expt1 |
| EDPLLTVPVASENPFRR           | 2  | 6754020                                                                                                     | N-Term(iTRAQ4plex)                                                   | 1926.01262 | 48 | 3.46 | Expt1 |
| LFVDPQSGLEVTGK              | 2  | 226531047;226531069                                                                                         | N-Term(iTRAQ4plex), K14(iTRAQ4plex)                                  | 1777.99582 | 48 | 2.98 | Expt1 |
| DVISFFTTSVER                | 1  | 6681115                                                                                                     | N-Term(iTRAQ4plex)                                                   | 1544.80828 | 48 |      | Expt1 |
| TEMQDNITYPEILR              | 2  | 110835723;110835726                                                                                         | N-Term(iTRAQ4plex)                                                   | 1753.85454 | 48 | 4.05 | Expt1 |
| SMEAEMIQLEELAAER            | 2  | 114326446                                                                                                   | N-Term(iTRAQ4plex), M2(Oxidation)                                    | 2209.06308 | 48 | 3.54 | Expt1 |
| DQGPQESLVR                  | 10 | 112421039                                                                                                   | N-Term(iTRAQ4plex)                                                   | 1272.66557 | 48 | 3.35 | Expt1 |
| NLQDAMQVCR                  | 2  | 6753320                                                                                                     | N-Term(iTRAQ4plex), C9(Methylthio)                                   | 1367.63713 | 48 | 2.98 | Expt1 |
| SLDDFQAWLGR                 | 2  | 55926127                                                                                                    | N-Term(iTRAQ4plex)                                                   | 1451.74407 | 48 | 2.84 | Expt1 |
| GVNAIVYMIDAADR              | 1  | 13385518                                                                                                    | N-Term(iTRAQ4plex), M8(Oxidation)                                    | 1667.85710 | 48 |      | Expt1 |
| EQFDTLTPEPPVDPNQEVPPGPPR    | 2  | 226442901                                                                                                   | N-Term(iTRAQ4plex)                                                   | 2800.39853 | 48 | 3.87 | Expt1 |
| GQDDAPAGGIWGFIIK            | 1  | 110625811                                                                                                   | N-Term(iTRAQ4plex), K15(iTRAQ4plex)                                  | 1819.97099 | 48 |      | Expt1 |
| VWTSGQVEEYDLDDADDINSR       | 5  | 6680710                                                                                                     | N-Term(iTRAQ4plex), Q6(Deamidated), N18(Deamidated)                  | 2458.12369 | 48 | 6.08 | Expt1 |
| AEDMAELTCLNEASVLHNLRR       | 2  | 29336026                                                                                                    | N-Term(iTRAQ4plex), C9(Methylthio)                                   | 2419.15189 | 48 | 2.99 | Expt1 |
| GTEDFIVESLDASFR             | 2  | 82950283;165377206                                                                                          | N-Term(iTRAQ4plex)                                                   | 1829.90752 | 48 | 3.16 | Expt1 |
| FSLAGATNLANGLLR             | 2  | 124249351                                                                                                   | N-Term(iTRAQ4plex), N10(Deamidated)                                  | 1648.91544 | 48 | 3.99 | Expt1 |
| LIGNMALLPLR                 | 5  | 9790141                                                                                                     | N-Term(iTRAQ4plex), M5(Oxidation)                                    | 1370.83415 | 48 | 3.09 | Expt1 |
| MPSLEVSVPK                  | 3  | 61743961                                                                                                    | N-Term(iTRAQ4plex), K10(iTRAQ4plex)                                  | 1374.79253 | 48 | 3.54 | Expt1 |
| MLVVLLQGTR                  | 1  | 31981302;158966670                                                                                          | N-Term(iTRAQ4plex), M1(Oxidation)                                    | 1289.77507 | 48 |      | Expt1 |
| MELQEIQLK                   | 8  | 40254525;31560030;256000780;256000786;256000790;256000792;256000796;256000782;256000788;256000794;256000784 | N-Term(iTRAQ4plex), K9(iTRAQ4plex)                                   | 1419.82353 | 48 | 3.68 | Expt1 |
| QILLGPNPTGLSGGMPGALPPLPGK   | 2  | 31982091                                                                                                    | N-Term(iTRAQ4plex), K24(iTRAQ4plex)                                  | 2573.48325 | 48 | 3.26 | Expt1 |
| IAAFADAAVDPIDFPLAPAYAVPK    | 2  | 21450129                                                                                                    | N-Term(iTRAQ4plex), K24(iTRAQ4plex)                                  | 2731.50473 | 47 | 3.38 | Expt1 |
| QVTFLEIGVNNAPFIK            | 2  | 133778947                                                                                                   | N-Term(iTRAQ4plex), K16(iTRAQ4plex)                                  | 2060.17215 | 47 | 3.63 | Expt1 |
| AIGAVPLIQGEYMIPICEK         | 2  | 6753556                                                                                                     | N-Term(iTRAQ4plex), M13(Oxidation), C16(Methylthio), K18(iTRAQ4plex) | 2282.19413 | 47 | 3.20 | Expt1 |
| GFAYVQFEDVR                 | 4  | 6753820;122937372                                                                                           | N-Term(iTRAQ4plex)                                                   | 1474.74773 | 47 | 3.44 | Expt1 |
| NALPTPSDDPTALMTDPK          | 2  | 84871986                                                                                                    | N-Term(iTRAQ4plex), K18(iTRAQ4plex)                                  | 2172.11478 | 47 | 3.82 | Expt1 |

|                          |    |                                                                                                                                                                                    |                                                                     |            |    |      |       |
|--------------------------|----|------------------------------------------------------------------------------------------------------------------------------------------------------------------------------------|---------------------------------------------------------------------|------------|----|------|-------|
| LELFLPEEYPMAPK           | 3  | 18017605;149262987;149260581;149260615                                                                                                                                             | N-Term(iTRAQ4plex), K15(iTRAQ4plex)                                 | 2036.10674 | 47 | 4.01 | Expt1 |
| GFTPVDDPVTTER            | 2  | 21311871                                                                                                                                                                           | N-Term(iTRAQ4plex)                                                  | 1575.81450 | 47 | 3.69 | Expt1 |
| VLIQVGYEPLPTIGR          | 2  | 9790055                                                                                                                                                                            | N-Term(iTRAQ4plex)                                                  | 1896.10837 | 47 | 3.27 | Expt1 |
| AQEVQPPPAPEAVVESQQLIEINR | 1  | 9910572                                                                                                                                                                            | N-Term(iTRAQ4plex)                                                  | 2802.44583 | 47 |      | Expt1 |
| DVAWAPSIGLPTSTIASCSDGR   | 2  | 29150272                                                                                                                                                                           | N-Term(iTRAQ4plex), C18(Methylthio)                                 | 2522.21720 | 47 |      | Expt1 |
| GNLANVIR                 | 20 | 22094075;148747424;254692892                                                                                                                                                       | N-Term(iTRAQ4plex)                                                  | 1000.60253 | 47 | 3.32 | Expt1 |
| EAFLENSTLSDQLPQPEER      | 4  | 145699091                                                                                                                                                                          | N-Term(iTRAQ4plex)                                                  | 2347.15665 | 47 | 3.21 | Expt1 |
| VYSLFLDESR               | 2  | 6755382                                                                                                                                                                            | N-Term(iTRAQ4plex)                                                  | 1372.72466 | 47 | 2.86 | Expt1 |
| DAGYEFDICFTSVQK          | 1  | 114326546                                                                                                                                                                          | N-Term(iTRAQ4plex), C9(Methylthio), K15(iTRAQ4plex)                 | 2056.96909 | 47 |      | Expt1 |
| IAQFLSGIPETVPLSTVNR      | 3  | 18700004;22122797                                                                                                                                                                  | N-Term(iTRAQ4plex)                                                  | 2186.23716 | 47 | 3.33 | Expt1 |
| QIFNGTFVK                | 2  | 31981515                                                                                                                                                                           | N-Term(iTRAQ4plex), N4(Deamidated), K9(iTRAQ4plex)                  | 1342.76006 | 47 | 3.25 | Expt1 |
| VLPMTGVEAGETACK          | 3  | 8393866                                                                                                                                                                            | N-Term(iTRAQ4plex), M4(Oxidation), C15(Methylthio), K16(iTRAQ4plex) | 1969.96269 | 47 | 3.73 | Expt1 |
| DLTETLK                  | 4  | 149265291;22165408                                                                                                                                                                 | N-Term(iTRAQ4plex), K7(iTRAQ4plex)                                  | 1107.64299 | 47 | 3.05 | Expt1 |
| TVPQVVNVQELR             | 2  | 124378033                                                                                                                                                                          | N-Term(iTRAQ4plex)                                                  | 1525.88359 | 47 | 3.04 | Expt1 |
| GAILTMLATR               | 2  | 70906477;18158420;28916677;70906479;226693349                                                                                                                                      | N-Term(iTRAQ4plex)                                                  | 1291.75432 | 47 | 2.91 | Expt1 |
| SGVSLAALK                | 2  | 13430890;9845257;21426823;254588110                                                                                                                                                | N-Term(iTRAQ4plex), K9(iTRAQ4plex)                                  | 1133.72270 | 47 | 3.47 | Expt1 |
| SLAEQNLEFQGPLEISR        | 2  | 31088908                                                                                                                                                                           | N-Term(iTRAQ4plex)                                                  | 2075.08884 | 47 | 3.80 | Expt1 |
| DIPLEELVFTVDEK           | 1  | 17157983                                                                                                                                                                           | N-Term(iTRAQ4plex), K15(iTRAQ4plex)                                 | 2032.11417 | 47 |      | Expt1 |
| ELVNNLAEIYGR             | 1  | 215983062                                                                                                                                                                          | N-Term(iTRAQ4plex)                                                  | 1534.84050 | 47 |      | Expt1 |
| TETITGFQVDAIPANGQTPVQR   | 3  | 46849812                                                                                                                                                                           | N-Term(iTRAQ4plex), Q17(Deamidated)                                 | 2488.29105 | 47 | 3.49 | Expt1 |
| VSEQLIEILEK              | 1  | 149246587                                                                                                                                                                          | N-Term(iTRAQ4plex), K12(iTRAQ4plex)                                 | 1645.96213 | 47 |      | Expt1 |
| DPLSGLLLLPALEGYR         | 2  | 111185907                                                                                                                                                                          | N-Term(iTRAQ4plex)                                                  | 2002.12261 | 47 | 3.15 | Expt1 |
| FYEQMNGPVTSGSR           | 2  | 56699438;54287684                                                                                                                                                                  | N-Term(iTRAQ4plex), M5(Oxidation), N6(Deamidated)                   | 1733.79436 | 47 |      | Expt1 |
| GEAGIPAEFSIWTR           | 1  | 145966915                                                                                                                                                                          | N-Term(iTRAQ4plex)                                                  | 1677.87639 | 47 |      | Expt1 |
| ADVEIPFEEVLEK            | 2  | 6755997                                                                                                                                                                            | N-Term(iTRAQ4plex), K13(iTRAQ4plex)                                 | 1805.98772 | 47 |      | Expt1 |
| LSFYETGEIPR              | 3  | 126090932                                                                                                                                                                          | N-Term(iTRAQ4plex)                                                  | 1455.76604 | 47 | 3.55 | Expt1 |
| EADESLNFEEQILEAAK        | 2  | 227116327                                                                                                                                                                          | N-Term(iTRAQ4plex), K17(iTRAQ4plex)                                 | 2224.13248 | 47 | 3.80 | Expt1 |
| GLFTGLTPR                | 2  | 9790055                                                                                                                                                                            | N-Term(iTRAQ4plex)                                                  | 1105.64824 | 47 | 2.97 | Expt1 |
| VSGVPPPQIFWK             | 1  | 124487061                                                                                                                                                                          | N-Term(iTRAQ4plex), K12(iTRAQ4plex)                                 | 1642.96477 | 47 |      | Expt1 |
| DAGQISGLNVLR             | 6  | 162461907                                                                                                                                                                          | N-Term(iTRAQ4plex)                                                  | 1386.78301 | 47 | 3.68 | Expt1 |
| TFVQSASATMQYAQR          | 4  | 194328702;194328706;18700026;194328708                                                                                                                                             | N-Term(iTRAQ4plex)                                                  | 1960.96671 | 47 | 3.24 | Expt1 |
| VSETVAFTDVNSILR          | 4  | 82617575                                                                                                                                                                           | N-Term(iTRAQ4plex)                                                  | 1794.97208 | 47 | 3.70 | Expt1 |
| QEQLPIDENQLSLEMNK        | 2  | 31543255                                                                                                                                                                           | N-Term(iTRAQ4plex), K18(iTRAQ4plex)                                 | 2404.22715 | 47 | 3.40 | Expt1 |
| WDDPYDIAR                | 2  | 225543424;225543420                                                                                                                                                                | N-Term(iTRAQ4plex)                                                  | 1457.68035 | 47 |      | Expt1 |
| SQDADLPGSSGAPENLTFK      | 2  | 145587092                                                                                                                                                                          | N-Term(iTRAQ4plex), K19(iTRAQ4plex)                                 | 2222.12729 | 47 | 3.72 | Expt1 |
| VLFDTGVLNPR              | 4  | 94394792;171543883                                                                                                                                                                 | N-Term(iTRAQ4plex)                                                  | 1374.78948 | 47 | 3.59 | Expt1 |
| IETIEVMEDR               | 6  | 82801284;94371439;149252089;82918363;82918359;82954743;149266199;82954739;149266543;149266545;82956957;51769129;149266569;82957137;94400765;149268214;149268216;37674277;157277969 | N-Term(iTRAQ4plex), M7(Oxidation)                                   | 1394.69646 | 47 | 3.03 | Expt1 |
| QWSGTPPVCTPMK            | 1  | 21703702                                                                                                                                                                           | N-Term(iTRAQ4plex), C9(Methylthio), K13(iTRAQ4plex)                 | 1765.87786 | 47 |      | Expt1 |
| EAGNITTDGYEILGK          | 2  | 111074529                                                                                                                                                                          | N-Term(iTRAQ4plex), K15(iTRAQ4plex)                                 | 1868.97489 | 47 | 3.19 | Expt1 |
| FLVEYIAPMTEK             | 1  | 6755106                                                                                                                                                                            | N-Term(iTRAQ4plex), K12(iTRAQ4plex)                                 | 1728.95029 | 47 |      | Expt1 |
| LMTEQENGLR               | 2  | 226423931                                                                                                                                                                          | N-Term(iTRAQ4plex), N7(Deamidated)                                  | 1449.71282 | 47 | 3.47 | Expt1 |
| IALTDNLSIAR              | 2  | 31981515                                                                                                                                                                           | N-Term(iTRAQ4plex)                                                  | 1330.78349 | 47 | 3.47 | Expt1 |
| EPMTVSSDQMAK             | 2  | 31982861                                                                                                                                                                           | N-Term(iTRAQ4plex), M10(Oxidation), K12(iTRAQ4plex)                 | 1627.80100 | 47 | 4.87 | Expt1 |
| DTCPPLMLYNPTTYQMDVNPPEGK | 3  | 46560582;6681283                                                                                                                                                                   | N-Term(iTRAQ4plex), C3(Methylthio), K23(iTRAQ4plex)                 | 2961.36802 | 47 | 3.21 | Expt1 |
| YFYDQCPAVAGYGPQIEQLPDYNR | 4  | 46593021                                                                                                                                                                           | N-Term(iTRAQ4plex), C6(Methylthio)                                  | 2869.31723 | 47 | 3.77 | Expt1 |

|                            |    |                               |                                                                                    |            |    |      |       |
|----------------------------|----|-------------------------------|------------------------------------------------------------------------------------|------------|----|------|-------|
| FFDEESYLLR                 | 2  | 6678145;262050625             | N-Term(iTRAQ4plex)                                                                 | 1549.76970 | 47 | 3.16 | Expt1 |
| EIDGGLETLR                 | 5  | 149257125;149257127;38142460  | N-Term(iTRAQ4plex)                                                                 | 1246.67839 | 47 | 2.99 | Expt1 |
| TSDPTMSSFR                 | 4  | 111074529                     | N-Term(iTRAQ4plex), M6(Oxidation)                                                  | 1288.59673 | 47 |      | Expt1 |
| QDIITALDNVEAR              | 2  | 27370032                      | N-Term(iTRAQ4plex)                                                                 | 1714.94913 | 47 | 4.51 | Expt1 |
| GMTTVDDFFQGTK              | 2  | 209862992;6681219             | N-Term(iTRAQ4plex), K13(iTRAQ4plex)                                                | 1734.86113 | 47 | 3.43 | Expt1 |
| ALLTLADGR                  | 1  | 149254235;160707925           | N-Term(iTRAQ4plex)                                                                 | 1073.64409 | 47 |      | Expt1 |
| AMGPLVLTEVLFDEK            | 2  | 149261435                     | N-Term(iTRAQ4plex), M2(Oxidation), K15(iTRAQ4plex)                                 | 1966.08487 | 47 | 3.32 | Expt1 |
| ALTELMNVVSEGK              | 2  | 13385466                      | N-Term(iTRAQ4plex), K13(iTRAQ4plex)                                                | 1765.94602 | 47 | 3.80 | Expt1 |
| LVSDEMVVELIEK              | 2  | 149253038;34328230;77020262   | N-Term(iTRAQ4plex), K13(iTRAQ4plex)                                                | 1792.00980 | 47 | 3.01 | Expt1 |
| IYLPDDPSVPAPPR             | 1  | 149270772;149270774;153791796 | N-Term(iTRAQ4plex)                                                                 | 1777.96709 | 47 |      | Expt1 |
| GIVNGAAPLVPVPTGGPMAGAR     | 2  | 19705578                      | N-Term(iTRAQ4plex), N4(Deamidated)                                                 | 2177.15219 | 47 | 3.31 | Expt1 |
| TSPTPSVFLVGEELVAVTARPEAVER | 2  | 23943828                      | N-Term(iTRAQ4plex)                                                                 | 3186.64248 | 47 | 3.75 | Expt1 |
| TSGTVEDDLIIFPDDCEFK        | 4  | 149251337;149251339;31981027  | N-Term(iTRAQ4plex), C16(Methylthio), K19(iTRAQ4plex)                               | 2478.17154 | 46 | 3.61 | Expt1 |
| WDETPASQMGGSTPVLTPGK       | 2  | 153791358                     | N-Term(iTRAQ4plex), K20(iTRAQ4plex)                                                | 2347.18631 | 46 | 4.12 | Expt1 |
| AGGEVPAGTQPPQQYYLK         | 1  | 31543345                      | N-Term(iTRAQ4plex), K19(iTRAQ4plex)                                                | 2320.22019 | 46 |      | Expt1 |
| EMVQNLMLVLR                | 6  | 227330582;6996917             | N-Term(iTRAQ4plex)                                                                 | 1376.75517 | 46 | 3.60 | Expt1 |
| EVQDGIAPR                  | 2  | 7305619                       | N-Term(iTRAQ4plex)                                                                 | 1128.61394 | 46 | 3.24 | Expt1 |
| EQMEEEVVAR                 | 1  | 29336026                      | N-Term(iTRAQ4plex), M3(Oxidation)                                                  | 1379.66167 | 46 |      | Expt1 |
| ALLQEMPLTALLR              | 1  | 7305523                       | N-Term(iTRAQ4plex), M6(Oxidation)                                                  | 1628.95891 | 46 |      | Expt1 |
| ELQSQISDTSVLSMDNSR         | 1  | 114145561                     | N-Term(iTRAQ4plex), M15(Oxidation)                                                 | 2269.12131 | 46 |      | Expt1 |
| ASALATIGPPELITSEVTAR       | 2  | 226423922                     | N-Term(iTRAQ4plex)                                                                 | 2242.25241 | 46 | 3.47 | Expt1 |
| ADASLTVDVTSPASK            | 1  | 224967109                     | N-Term(iTRAQ4plex), K16(iTRAQ4plex)                                                | 1836.98076 | 46 |      | Expt1 |
| YIEIYVQK                   | 2  | 51491845                      | N-Term(iTRAQ4plex), K8(iTRAQ4plex)                                                 | 1343.78093 | 46 | 3.20 | Expt1 |
| DLTGVQNLNR                 | 6  | 115496850                     | N-Term(iTRAQ4plex)                                                                 | 1159.65557 | 46 | 3.39 | Expt1 |
| STLNELVDYITISR             | 2  | 33859660                      | N-Term(iTRAQ4plex)                                                                 | 1767.96183 | 46 | 3.43 | Expt1 |
| YIDSTDLEPSTLQEEPVR         | 4  | 172072613                     | N-Term(iTRAQ4plex)                                                                 | 2236.11820 | 46 | 3.35 | Expt1 |
| IINFLYSTVGALDK             | 1  | 226423922                     | N-Term(iTRAQ4plex), K14(iTRAQ4plex)                                                | 1842.06369 | 46 |      | Expt1 |
| ALLQAQEP                   | 1  | 19526986                      | N-Term(iTRAQ4plex)                                                                 | 1013.57543 | 46 |      | Expt1 |
| LGMPQFLSPEAQSLLR           | 1  | 22507357                      | N-Term(iTRAQ4plex), M3(Oxidation)                                                  | 1947.04827 | 46 |      | Expt1 |
| CEMEAQNQEYNMLLDIK          | 2  | 226823220                     | N-Term(iTRAQ4plex), C1(Methylthio), M3(Oxidation), M12(Oxidation), K17(iTRAQ4plex) | 2438.09726 | 46 | 3.72 | Expt1 |
| DLQNVNITLR                 | 4  | 6679299;85702063              | N-Term(iTRAQ4plex)                                                                 | 1329.76262 | 46 | 3.71 | Expt1 |
| DNLNAEDIMR                 | 7  | 31982755                      | N-Term(iTRAQ4plex), M8(Oxidation)                                                  | 1236.60161 | 46 | 3.15 | Expt1 |
| MLEESVAFAK                 | 2  | 226442740;67906175            | N-Term(iTRAQ4plex), K11(iTRAQ4plex)                                                | 1541.82109 | 46 | 4.04 | Expt1 |
| AENLGEVLR                  | 2  | 31542095                      | N-Term(iTRAQ4plex)                                                                 | 1144.64226 | 46 | 3.58 | Expt1 |
| MMNNYDCLPEEETNPK           | 12 | 9790161                       | N-Term(iTRAQ4plex), M2(Oxidation), C8(Methylthio), K18(iTRAQ4plex)                 | 2489.06852 | 46 | 3.43 | Expt1 |
| VTDALNATR                  | 2  | 51766670;183396771            | N-Term(iTRAQ4plex)                                                                 | 1104.61333 | 46 | 2.85 | Expt1 |
| SEISGLAR                   | 1  | 31981302;158966670            | N-Term(iTRAQ4plex)                                                                 | 1091.58061 | 46 |      | Expt1 |
| SVPASNYV                   | 4  | 6753440                       | N-Term(iTRAQ4plex)                                                                 | 980.51775  | 46 |      | Expt1 |
| VFFTDYGGQIPK               | 2  | 124494256                     | N-Term(iTRAQ4plex), K11(iTRAQ4plex)                                                | 1602.88225 | 46 | 4.28 | Expt1 |
| VNSILGCSQ                  | 1  | 160358829                     | N-Term(iTRAQ4plex), C7(Methylthio)                                                 | 1110.54289 | 46 |      | Expt1 |
| DAADQNFDYMFK               | 2  | 15042957                      | N-Term(iTRAQ4plex), K12(iTRAQ4plex)                                                | 1752.81845 | 46 | 3.08 | Expt1 |
| QINWTVLYR                  | 5  | 18250296;94386657;94381396    | N-Term(iTRAQ4plex)                                                                 | 1336.75127 | 46 | 3.22 | Expt1 |
| GIIDSTVSEQR                | 4  | 62234487                      | N-Term(iTRAQ4plex)                                                                 | 1348.71977 | 46 | 3.16 | Expt1 |
| QLPIYTEAIVEMYR             | 2  | 29336026                      | N-Term(iTRAQ4plex)                                                                 | 1869.99321 | 46 |      | Expt1 |
| GSMYDGLADNYYNYGTTSR        | 1  | 9790161                       | N-Term(iTRAQ4plex), M3(Oxidation)                                                  | 2258.97708 | 46 |      | Expt1 |
| SDQIALPDFNAGAMENWGLVTYR    | 1  | 225637487                     | N-Term(iTRAQ4plex)                                                                 | 2712.32718 | 46 |      | Expt1 |
| ELQSLLEVER                 | 2  | 31980988                      | N-Term(iTRAQ4plex)                                                                 | 1359.76103 | 46 | 3.26 | Expt1 |
| GSTSVNGQISVR               | 1  | 124487155                     | N-Term(iTRAQ4plex), N6(Deamidated)                                                 | 1349.71587 | 46 |      | Expt1 |
| SQNIITDSSSLNAEAIR          | 1  | 117938332;117938334           | N-Term(iTRAQ4plex)                                                                 | 1963.02214 | 46 |      | Expt1 |
| TIPDDNVVCFTR               | 2  | 170650621                     | N-Term(iTRAQ4plex), C10(Methylthio)                                                | 1670.80168 | 46 | 3.69 | Expt1 |
| LQNQLQTDLSPVIVINR          | 6  | 225637487                     | N-Term(iTRAQ4plex)                                                                 | 2095.20536 | 46 | 3.32 | Expt1 |



|                              |   |                                                  |                                                                          |            |    |      |       |
|------------------------------|---|--------------------------------------------------|--------------------------------------------------------------------------|------------|----|------|-------|
| YLPDIK                       | 1 | 6679793                                          | N-Term(iTRAQ4plex), K7(iTRAQ4plex)                                       | 1149.71172 | 46 |      | Expt1 |
| EVSFQATGDSEWR                | 1 | 112181167                                        | N-Term(iTRAQ4plex)                                                       | 1655.78447 | 46 |      | Expt1 |
| GLGTGLTYIAESR                | 2 | 19263324                                         | N-Term(iTRAQ4plex)                                                       | 1481.80828 | 46 | 3.76 | Expt1 |
| YLATADSSLLQTNLLQMDK          | 1 | 226423935                                        | N-Term(iTRAQ4plex), K21(iTRAQ4plex)                                      | 2655.39896 | 46 |      | Expt1 |
| ADAGGEDAILQTR                | 2 | 13385890                                         | N-Term(iTRAQ4plex)                                                       | 1460.74809 | 46 | 3.30 | Expt1 |
| FSFGLLDSFPR                  | 2 | 148839318                                        | N-Term(iTRAQ4plex)                                                       | 1429.75981 | 46 | 3.41 | Expt1 |
| GASGSGPTIEVD                 | 2 | 124339829;124339826                              | N-Term(iTRAQ4plex)                                                       | 1362.65300 | 46 |      | Expt1 |
| SSVLENFVGR                   | 5 | 84490431;87299637;11606357<br>0;27369922         | N-Term(iTRAQ4plex)                                                       | 1251.68364 | 46 | 3.45 | Expt1 |
| QEQDTYALSSYTR                | 2 | 21450129                                         | N-Term(iTRAQ4plex)                                                       | 1705.81963 | 46 | 3.14 | Expt1 |
| ASAAFSSVGSVITK               | 2 | 70608194;70608205;70608198;<br>6678407;70608214  | N-Term(iTRAQ4plex), K14(iTRAQ4plex)                                      | 1612.91965 | 46 | 3.22 | Expt1 |
| DLLVQASQCLSK                 | 3 | 149270322;124487099                              | N-Term(iTRAQ4plex), C10(Methylthio), K13(iTRAQ4plex)                     | 1766.94596 | 46 | 3.64 | Expt1 |
| CMQLTDFILK                   | 2 | 149257159;13385472                               | N-Term(iTRAQ4plex), C1(Methylthio), K10(iTRAQ4plex)                      | 1545.81413 | 46 |      | Expt1 |
| ILGPAESDEFAR                 | 2 | 237820660                                        | N-Term(iTRAQ4plex)                                                       | 1561.83586 | 46 | 3.44 | Expt1 |
| AYLVSNEPMEGAFNYVQTR          | 1 | 118601068                                        | N-Term(iTRAQ4plex)                                                       | 2333.14212 | 46 |      | Expt1 |
| AECLNPAQGR                   | 4 | 94394792;171543883                               | N-Term(iTRAQ4plex), C3(Methylthio)                                       | 1345.64836 | 46 | 3.70 | Expt1 |
| QQSEEDLLLQDFSR               | 2 | 21312968                                         | N-Term(iTRAQ4plex)                                                       | 1851.92644 | 46 | 3.67 | Expt1 |
| MQAQATVEGAPQLSMVGLFQR        | 2 | 27369998                                         | N-Term(iTRAQ4plex), M15(Oxidation)                                       | 2422.24546 | 46 | 3.42 | Expt1 |
| GLGLDDALEPR                  | 2 | 6755382                                          | N-Term(iTRAQ4plex)                                                       | 1299.70403 | 46 | 3.47 | Expt1 |
| GAAGALMVYDITR                | 1 | 18390323                                         | N-Term(iTRAQ4plex), M7(Oxidation)                                        | 1497.78838 | 46 |      | Expt1 |
| SIQVVVAR                     | 3 | 13384754                                         | N-Term(iTRAQ4plex), Q3(Deamidated)                                       | 1045.60229 | 45 |      | Expt1 |
| TEMEDLMSSK                   | 1 | 114326446                                        | N-Term(iTRAQ4plex), K10(iTRAQ4plex)                                      | 1458.70806 | 45 |      | Expt1 |
| LDVATDNFFQNPPLYIR            | 1 | 149251004;86476044                               | N-Term(iTRAQ4plex)                                                       | 2199.12375 | 45 |      | Expt1 |
| AYLESEVAISEELVQK             | 2 | 34610241;34610235;34610233;<br>34610237;13195648 | N-Term(iTRAQ4plex), K16(iTRAQ4plex)                                      | 2096.14872 | 45 | 3.74 | Expt1 |
| CTELNQAQWTSLGK               | 2 | 115496850                                        | N-Term(iTRAQ4plex), C1(Methylthio), K13(iTRAQ4plex)                      | 1784.89469 | 45 | 2.89 | Expt1 |
| EIADVR                       | 1 | 124487039                                        | N-Term(iTRAQ4plex)                                                       | 959.56329  | 45 |      | Expt1 |
| NQVEDLLATLEK                 | 1 | 224809376                                        | N-Term(iTRAQ4plex), K12(iTRAQ4plex)                                      | 1660.94236 | 45 |      | Expt1 |
| LFGYQPTIYYPK                 | 6 | 21553309                                         | N-Term(iTRAQ4plex), K12(iTRAQ4plex)                                      | 1777.98161 | 45 | 3.39 | Expt1 |
| GQVLAAYELQR                  | 1 | 55926127                                         | N-Term(iTRAQ4plex)                                                       | 1462.81556 | 45 |      | Expt1 |
| QLDEYSSSVANFLQAR             | 1 | 45597453                                         | N-Term(iTRAQ4plex)                                                       | 1971.99492 | 45 |      | Expt1 |
| DINWSSSQWQLIQDR              | 2 | 170784813;170784811                              | N-Term(iTRAQ4plex)                                                       | 2145.05344 | 45 | 3.18 | Expt1 |
| YEQGTGCWQGNR                 | 2 | 6679465                                          | N-Term(iTRAQ4plex), C7(Methylthio)                                       | 1685.73088 | 45 | 3.04 | Expt1 |
| MIYEMFSGDFTR                 | 1 | 114145467                                        | N-Term(iTRAQ4plex), M1(Oxidation), M5(Oxidation)                         | 1672.75041 | 45 |      | Expt1 |
| IYVSQYPF                     | 4 | 6753824                                          | N-Term(iTRAQ4plex)                                                       | 1160.61199 | 45 |      | Expt1 |
| NDQCYEDIR                    | 3 | 6753494                                          | N-Term(iTRAQ4plex), C4(Methylthio)                                       | 1345.56413 | 45 | 3.25 | Expt1 |
| VIYEAELSQMQTHISDTSVVLMSMDNRR | 2 | 113195684                                        | N-Term(iTRAQ4plex), M23(Oxidation)                                       | 3240.57419 | 45 | 3.95 | Expt1 |
| ICDIAAELAR                   | 1 | 29789199                                         | N-Term(iTRAQ4plex), C2(Methylthio)                                       | 1264.65312 | 45 |      | Expt1 |
| MLSPEQLTIFR                  | 1 | 225543183                                        | N-Term(iTRAQ4plex), M1(Oxidation)                                        | 1494.81487 | 45 |      | Expt1 |
| LVQAAQMLQSDPYVSPAR           | 1 | 31543942                                         | N-Term(iTRAQ4plex), M7(Oxidation)                                        | 2134.11490 | 45 |      | Expt1 |
| IANPDQLLTQDVEK               | 2 | 60218877                                         | N-Term(iTRAQ4plex), K14(iTRAQ4plex)                                      | 1872.03275 | 45 | 3.98 | Expt1 |
| AGDTVIPLYPQCGECK             | 3 | 31982511                                         | N-Term(iTRAQ4plex), C13(Methylthio), C16(Methylthio),<br>K17(iTRAQ4plex) | 2187.05693 | 45 | 3.49 | Expt1 |
| VDPSLMEDSDDGSPSLPTK          | 1 | 13385882                                         | N-Term(iTRAQ4plex), M6(Oxidation), K18(iTRAQ4plex)                       | 2207.06614 | 45 |      | Expt1 |
| NLCSDDTPMVR                  | 3 | 8394027                                          | N-Term(iTRAQ4plex), C3(Methylthio)                                       | 1440.64263 | 45 | 3.56 | Expt1 |
| LTEMETMQSQLMAEK              | 3 | 114326446                                        | N-Term(iTRAQ4plex), M12(Oxidation), K15(iTRAQ4plex)                      | 2074.01804 | 45 | 4.09 | Expt1 |
| LYSPSQIGAFVLMK               | 1 | 162461907                                        | N-Term(iTRAQ4plex), K14(iTRAQ4plex)                                      | 1842.05564 | 45 |      | Expt1 |
| LNTIPLFVQLLYSSVENIQR         | 2 | 28395018                                         | N-Term(iTRAQ4plex)                                                       | 2491.41391 | 45 | 3.51 | Expt1 |
| EVFEDAMEIR                   | 2 | 84875537                                         | N-Term(iTRAQ4plex), M7(Oxidation)                                        | 1398.67058 | 45 |      | Expt1 |
| TTLYSLEIVFPFLGDSTVTK         | 2 | 110625683                                        | N-Term(iTRAQ4plex), K20(iTRAQ4plex)                                      | 2519.39774 | 45 | 4.53 | Expt1 |
| FTEVNAINR                    | 5 | 112421039                                        | N-Term(iTRAQ4plex)                                                       | 1207.65813 | 45 | 3.29 | Expt1 |
| LVPLNQESVEER                 | 1 | 149272563;27369533                               | N-Term(iTRAQ4plex)                                                       | 1556.84026 | 45 |      | Expt1 |
| AVQFFVQALR                   | 2 | 31980994                                         | N-Term(iTRAQ4plex)                                                       | 1322.77458 | 45 | 2.83 | Expt1 |
| VSNQMLTLFFMVQQDIPVR          | 2 | 148277039                                        | N-Term(iTRAQ4plex)                                                       | 2410.28904 | 45 | 3.90 | Expt1 |
| AEQEEEFISNTLFK               | 2 | 82933348                                         | N-Term(iTRAQ4plex), K14(iTRAQ4plex)                                      | 1973.01670 | 45 | 3.09 | Expt1 |
| YESLTDPSK                    | 1 | 40556608;6754254                                 | N-Term(iTRAQ4plex), K9(iTRAQ4plex)                                       | 1327.70232 | 45 |      | Expt1 |

|                              |   |                                                                                                |                                                      |            |    |      |       |
|------------------------------|---|------------------------------------------------------------------------------------------------|------------------------------------------------------|------------|----|------|-------|
| AEVEEEMEEEEEEQVVEEPTVK       | 2 | 120407050                                                                                      | N-Term(iTRAQ4plex), K25(iTRAQ4plex)                  | 3237.46469 | 45 | 4.09 | Expt1 |
| LVICPDEGFYK                  | 2 | 21704162                                                                                       | N-Term(iTRAQ4plex), C4(Methylthio), K11(iTRAQ4plex)  | 1617.83025 | 45 | 3.22 | Expt1 |
| VGISLLSSPH                   | 2 | 13384766                                                                                       | N-Term(iTRAQ4plex)                                   | 1250.72576 | 45 | 3.49 | Expt1 |
| DSGVDAAGNMLVK                | 1 | 93102415                                                                                       | N-Term(iTRAQ4plex), K14(iTRAQ4plex)                  | 1677.90715 | 45 |      | Expt1 |
| YDQQAEDLR                    | 4 | 21312564                                                                                       | N-Term(iTRAQ4plex)                                   | 1410.66472 | 45 | 3.36 | Expt1 |
| NGFSITGGFTR                  | 4 | 171543883                                                                                      | N-Term(iTRAQ4plex), N1(Deamidated)                   | 1430.70488 | 45 | 3.23 | Expt1 |
| EFPGFLENQK                   | 2 | 6677833                                                                                        | N-Term(iTRAQ4plex), K10(iTRAQ4plex)                  | 1496.79436 | 45 | 3.75 | Expt1 |
| YIETSELGGAR                  | 2 | 71061458;71061455                                                                              | N-Term(iTRAQ4plex), C8(Methylthio)                   | 1488.69597 | 45 | 2.97 | Expt1 |
| VFPPIPEPDGCK                 | 1 | 12963667                                                                                       | N-Term(iTRAQ4plex), C11(Methylthio), K12(iTRAQ4plex) | 1632.84209 | 45 |      | Expt1 |
| IYLPHSLPQQ                   | 1 | 34538602;167716841;187373158                                                                   | N-Term(iTRAQ4plex)                                   | 1339.74614 | 45 |      | Expt1 |
| ETADTDADQVMASFK              | 2 | 61097906                                                                                       | N-Term(iTRAQ4plex), K16(iTRAQ4plex)                  | 2017.97293 | 45 | 4.32 | Expt1 |
| YAAVTQFEATDAR                | 9 | 68226731                                                                                       | N-Term(iTRAQ4plex)                                   | 1586.79288 | 45 | 4.29 | Expt1 |
| AVVLPISLATTFK                | 2 | 22122387                                                                                       | N-Term(iTRAQ4plex), K13(iTRAQ4plex)                  | 1648.03617 | 45 | 2.95 | Expt1 |
| DFNMPLTISSLK                 | 1 | 170650623;170650625;170650627                                                                  | N-Term(iTRAQ4plex), K12(iTRAQ4plex)                  | 1653.92264 | 45 |      | Expt1 |
| QGIQVLVSTNSVSSLEGAR          | 2 | 93102409                                                                                       | N-Term(iTRAQ4plex)                                   | 2089.14127 | 45 | 3.55 | Expt1 |
| FASEITPITISVK                | 2 | 21450129                                                                                       | N-Term(iTRAQ4plex), K13(iTRAQ4plex)                  | 1694.00498 | 45 | 3.11 | Expt1 |
| TPTVDVTPAEALNVDSPEINIGGK     | 2 | 61743961                                                                                       | N-Term(iTRAQ4plex), K25(iTRAQ4plex)                  | 2882.52994 | 45 | 4.88 | Expt1 |
| ILLTPMAAGSR                  | 6 | 111074529                                                                                      | N-Term(iTRAQ4plex), M6(Oxidation)                    | 1289.74199 | 45 |      | Expt1 |
| ILGIPVIITEQYPK               | 4 | 31541909                                                                                       | N-Term(iTRAQ4plex), K14(iTRAQ4plex)                  | 1872.15396 | 45 | 3.59 | Expt1 |
| TLGGLEMELR                   | 4 | 157951706                                                                                      | N-Term(iTRAQ4plex)                                   | 1262.69328 | 45 | 3.49 | Expt1 |
| YLSNAYAR                     | 5 | 15617203                                                                                       | N-Term(iTRAQ4plex)                                   | 1101.58196 | 45 | 3.07 | Expt1 |
| FSPLTANLMLNLLAENGR           | 2 | 149251053;51766932                                                                             | N-Term(iTRAQ4plex), N15(Deamidated)                  | 2006.05350 | 45 | 3.02 | Expt1 |
| GDIVFSESPDLEAR               | 2 | 124249058                                                                                      | N-Term(iTRAQ4plex)                                   | 1775.89897 | 45 | 3.33 | Expt1 |
| LATGSDDNCAAFFEGPPFK          | 9 | 6755995                                                                                        | N-Term(iTRAQ4plex), C9(Methylthio), K19(iTRAQ4plex)  | 2321.09140 | 45 | 4.47 | Expt1 |
| TVLSNVQEELDR                 | 1 | 225543181                                                                                      | N-Term(iTRAQ4plex)                                   | 1546.82244 | 45 |      | Expt1 |
| CQLEINFNTLQTK                | 7 | 61097906;11230802;7304855;157951643                                                            | N-Term(iTRAQ4plex), C1(Methylthio), K13(iTRAQ4plex)  | 1885.97820 | 45 | 3.83 | Expt1 |
| AGSPTLLNCLMYK                | 2 | 61651673                                                                                       | N-Term(iTRAQ4plex), C9(Methylthio), K13(iTRAQ4plex)  | 1744.89933 | 45 | 3.46 | Expt1 |
| QIENVLR                      | 1 | 149258752;14149756                                                                             | N-Term(iTRAQ4plex)                                   | 1015.59491 | 45 |      | Expt1 |
| EAQPQTPSQAR                  | 2 | 162417980                                                                                      | N-Term(iTRAQ4plex)                                   | 1356.70342 | 45 | 3.01 | Expt1 |
| YVGVSDDSVGGFR                | 2 | 154240730                                                                                      | N-Term(iTRAQ4plex)                                   | 1473.74748 | 45 | 3.61 | Expt1 |
| LIDEVIEDTR                   | 2 | 149270772;149270774;153791796                                                                  | N-Term(iTRAQ4plex)                                   | 1346.73296 | 45 | 3.20 | Expt1 |
| MPAAFMGMLK                   | 2 | 13385466                                                                                       | N-Term(iTRAQ4plex), M8(Oxidation), K10(iTRAQ4plex)   | 1400.73711 | 45 | 2.89 | Expt1 |
| AVQGGAAAPVVGAVQPVPGMPPMPQAPR | 2 | 149263421;114052541                                                                            | N-Term(iTRAQ4plex), M23(Oxidation)                   | 2810.50302 | 45 | 3.46 | Expt1 |
| AYYNGISLFFNNPVPYWEVQPATFR    | 3 | 20137008                                                                                       | N-Term(iTRAQ4plex), N4(Deamidated), Y15(iTRAQ4plex)  | 3135.59763 | 45 | 4.33 | Expt1 |
| AILGPMLLDQPLDGVTTSLPSPEQLK   | 2 | 9790167                                                                                        | N-Term(iTRAQ4plex), K26(iTRAQ4plex)                  | 3021.68753 | 45 | 4.06 | Expt1 |
| SETITEELVGLMKNK              | 4 | 82975294;113680352;51830180                                                                    | N-Term(iTRAQ4plex), K15(iTRAQ4plex)                  | 1981.04734 | 45 | 3.62 | Expt1 |
| YLTVAIFR                     | 2 | 33859488;21746161                                                                              | N-Term(iTRAQ4plex)                                   | 1197.71172 | 45 | 3.27 | Expt1 |
| ENGTVMGAEIR                  | 2 | 33620739;94363353;149252094;149252164;94383790;149265610;149266035;29789016;33563264;164664497 | N-Term(iTRAQ4plex), N3(Deamidated), M7(Oxidation)    | 1394.67229 | 45 |      | Expt1 |
| QVDVNASLAR                   | 2 | 31982755                                                                                       | N-Term(iTRAQ4plex)                                   | 1232.63896 | 45 | 2.84 | Expt1 |
| ELTGEDVLR                    | 1 | 134053913                                                                                      | N-Term(iTRAQ4plex)                                   | 1274.70952 | 45 |      | Expt1 |
| SPITVQWFLPSDK                | 3 | 167736365                                                                                      | N-Term(iTRAQ4plex), K14(iTRAQ4plex)                  | 1935.05381 | 45 | 3.89 | Expt1 |
| CDNGFSPPSGYSWDYLR            | 3 | 109627652;149274715;71361676                                                                   | N-Term(iTRAQ4plex), C1(Methylthio), N3(Deamidated)   | 2154.89751 | 45 | 3.82 | Expt1 |
| QLLDQVEIQIK                  | 1 | 19527236                                                                                       | N-Term(iTRAQ4plex), K11(iTRAQ4plex)                  | 1629.94846 | 45 |      | Expt1 |
| NNQFQALLQYADPNAQYAK          | 3 | 30039680;255003709                                                                             | N-Term(iTRAQ4plex), K20(iTRAQ4plex)                  | 2584.35495 | 44 | 3.91 | Expt1 |
| GDPQVYEEELFSYACPK            | 5 | 51093840                                                                                       | N-Term(iTRAQ4plex), C14(Methylthio), K16(iTRAQ4plex) | 2180.03008 | 44 | 3.79 | Expt1 |
| IPEISIQDMTAQVTPSPGK          | 1 | 125347376                                                                                      | N-Term(iTRAQ4plex), K19(iTRAQ4plex)                  | 2290.23392 | 44 |      | Expt1 |
| DLQMVNISLR                   | 1 | 126723336                                                                                      | N-Term(iTRAQ4plex), M4(Oxidation)                    | 1348.74126 | 44 |      | Expt1 |
| VTLLDASEYECEVEK              | 2 | 7305029;54873604                                                                               | N-Term(iTRAQ4plex), C11(Methylthio), K15(iTRAQ4plex) | 2062.00321 | 44 | 2.89 | Expt1 |

|                          |   |                                         |                                                      |            |    |      |       |
|--------------------------|---|-----------------------------------------|------------------------------------------------------|------------|----|------|-------|
| EANLLNAVIVQR             | 2 | 38198665;149253695;149253877            | N-Term(iTRAQ4plex)                                   | 1483.87424 | 44 |      | Expt1 |
| YQIPALAQAGFR             | 1 | 31982393                                | N-Term(iTRAQ4plex)                                   | 1478.82557 | 44 |      | Expt1 |
| GSPMEISLPIALSK           | 5 | 116734870                               | N-Term(iTRAQ4plex), K14(iTRAQ4plex)                  | 1731.00309 | 44 | 3.38 | Expt1 |
| LSPGAYPTVIQQQTAPSQR      | 2 | 81295418;209862955                      | N-Term(iTRAQ4plex)                                   | 2186.16959 | 44 | 2.95 | Expt1 |
| GNEMSEVLR                | 4 | 31560731                                | N-Term(iTRAQ4plex)                                   | 1178.59001 | 44 | 2.91 | Expt1 |
| QDFESTDTSIEDIESLIPK      | 3 | 31657132                                | N-Term(iTRAQ4plex), K18(iTRAQ4plex)                  | 2342.16098 | 44 | 3.01 | Expt1 |
| GGNFVGFSDSR              | 1 | 149274531;32880197;109134362            | N-Term(iTRAQ4plex)                                   | 1157.54912 | 44 |      | Expt1 |
| TEVETVFLVLR              | 2 | 61102728                                | N-Term(iTRAQ4plex)                                   | 1423.79277 | 44 | 3.48 | Expt1 |
| SLSLILYSR                | 2 | 149254182;51172612                      | N-Term(iTRAQ4plex)                                   | 1195.72038 | 44 | 3.26 | Expt1 |
| FNDEHIPDSPYLVPIAPSDDAR   | 2 | 145966915                               | N-Term(iTRAQ4plex)                                   | 2711.35178 | 44 | 5.79 | Expt1 |
| EFSNQVVGQVNVEMDATPGIDLTR | 2 | 6754480                                 | N-Term(iTRAQ4plex), M14(Oxidation)                   | 2779.37326 | 44 | 3.95 | Expt1 |
| TMDNQIVVSDY AQMDR        | 2 | 6753322                                 | N-Term(iTRAQ4plex), M3(Oxidation), M15(Oxidation)    | 2176.96634 | 44 | 3.15 | Expt1 |
| INEELESQYQQSMDSK         | 2 | 9790217                                 | N-Term(iTRAQ4plex), K16(iTRAQ4plex)                  | 2217.06333 | 44 | 3.76 | Expt1 |
| EIPVLNLPVPMVAR           | 3 | 229092758                               | N-Term(iTRAQ4plex)                                   | 1821.04814 | 44 | 2.95 | Expt1 |
| GVYVLMISGLDLER           | 1 | 9789985                                 | N-Term(iTRAQ4plex)                                   | 1595.86028 | 44 |      | Expt1 |
| MALDDMISTLK              | 1 | 6753320                                 | N-Term(iTRAQ4plex), M1(Oxidation), K11(iTRAQ4plex)   | 1541.82939 | 44 |      | Expt1 |
| LLLPLEAR                 | 5 | 51491845                                | N-Term(iTRAQ4plex)                                   | 1254.76885 | 44 | 2.89 | Expt1 |
| CAWGGQPDLAANEAQLLR       | 2 | 6755210                                 | N-Term(iTRAQ4plex), C1(Methylthio)                   | 2174.06614 | 44 | 3.46 | Expt1 |
| SSELLGPGYGMK             | 2 | 28395023                                | N-Term(iTRAQ4plex), K12(iTRAQ4plex)                  | 1582.87956 | 44 | 3.30 | Expt1 |
| VEGSEPSVTYYR             | 4 | 149275191;31542438                      | N-Term(iTRAQ4plex)                                   | 1530.75749 | 44 | 3.74 | Expt1 |
| DFMIQGGDFTR              | 2 | 6679441                                 | N-Term(iTRAQ4plex)                                   | 1501.72612 | 44 | 3.33 | Expt1 |
| AVNTQALSGAGILR           | 2 | 13385878                                | N-Term(iTRAQ4plex)                                   | 1514.87859 | 44 | 4.33 | Expt1 |
| AVSILGDEVFR              | 2 | 122114537                               | N-Term(iTRAQ4plex)                                   | 1349.75566 | 44 | 3.06 | Expt1 |
| MVMPWFVDMGLSPDPAPEDEAGIK | 2 | 7242156                                 | N-Term(iTRAQ4plex), K24(iTRAQ4plex)                  | 2924.41697 | 44 | 4.35 | Expt1 |
| ADLTAEMISAPLGDFR         | 2 | 9910142                                 | N-Term(iTRAQ4plex)                                   | 1850.94939 | 44 | 3.62 | Expt1 |
| MLSFLTEDLTK              | 1 | 225637487                               | N-Term(iTRAQ4plex), M1(Oxidation), K12(iTRAQ4plex)   | 1734.92521 | 44 |      | Expt1 |
| TIEDTLMTVK               | 2 | 124487362                               | N-Term(iTRAQ4plex), K10(iTRAQ4plex)                  | 1438.80559 | 44 | 2.86 | Expt1 |
| LQSEPESIR                | 2 | 122939192;122939196;122939194;122939198 | N-Term(iTRAQ4plex)                                   | 1202.65398 | 44 | 3.05 | Expt1 |
| ALEDVCIETIEAGFMTK        | 2 | 162417975                               | N-Term(iTRAQ4plex), C6(Methylthio), K17(iTRAQ4plex)  | 2204.09470 | 44 | 4.41 | Expt1 |
| IGFFQGDIR                | 1 | 31560705;58218988                       | N-Term(iTRAQ4plex)                                   | 1196.65911 | 44 |      | Expt1 |
| GWDQGLGMCEGEK            | 1 | 6679805                                 | N-Term(iTRAQ4plex), C10(Methylthio), K14(iTRAQ4plex) | 1856.86638 | 44 |      | Expt1 |
| LMWIPVYGGK               | 2 | 226423922                               | N-Term(iTRAQ4plex), K10(iTRAQ4plex)                  | 1451.83298 | 44 |      | Expt1 |
| EIEYVETVTSR              | 2 | 21313234                                | N-Term(iTRAQ4plex)                                   | 1469.76323 | 44 | 3.05 | Expt1 |
| VTNEPILAFSQGSPER         | 2 | 225543103                               | N-Term(iTRAQ4plex)                                   | 1888.99004 | 44 | 3.52 | Expt1 |
| DMDDEESWIK               | 2 | 115496850                               | N-Term(iTRAQ4plex), K10(iTRAQ4plex)                  | 1555.72258 | 44 | 3.81 | Expt1 |
| GSGSQSSVPSVDQFTGVGIR     | 2 | 36031035                                | N-Term(iTRAQ4plex)                                   | 2109.06841 | 44 | 3.20 | Expt1 |
| ILNFIK                   | 1 | 110625896                               | N-Term(iTRAQ4plex), N3(Deamidated), K6(iTRAQ4plex)   | 1036.67351 | 44 |      | Expt1 |
| LIDFLK                   | 2 | 42415475;19527052                       | N-Term(iTRAQ4plex), K6(iTRAQ4plex)                   | 1036.67351 | 44 |      | Expt1 |
| DFLLGAYQTEFPEGPTQLMK     | 4 | 31982393                                | N-Term(iTRAQ4plex), M20(Oxidation), K21(iTRAQ4plex)  | 2718.36197 | 44 | 4.01 | Expt1 |
| EYFGGFGEVIESIPLMDNK      | 6 | 116256518;116256514;116256516;116256512 | N-Term(iTRAQ4plex), M16(Oxidation), K19(iTRAQ4plex)  | 2465.18241 | 44 | 4.17 | Expt1 |
| FVEFFGPGVAQLSIADR        | 3 | 110347487                               | N-Term(iTRAQ4plex)                                   | 1997.06998 | 44 | 3.65 | Expt1 |
| DFDGIYVGNR               | 2 | 161484644                               | N-Term(iTRAQ4plex)                                   | 1478.66814 | 44 | 3.23 | Expt1 |
| NLLLSGEGLEASR            | 2 | 16716499                                | N-Term(iTRAQ4plex)                                   | 1573.87090 | 44 | 3.60 | Expt1 |
| LPNFGFVVDSDSEPVQR        | 3 | 31982757;124248575                      | N-Term(iTRAQ4plex)                                   | 2110.07938 | 44 | 3.05 | Expt1 |
| VWDLFPEADK               | 1 | 149258001;22203755                      | N-Term(iTRAQ4plex), K10(iTRAQ4plex)                  | 1507.81450 | 44 |      | Expt1 |
| VICPLPSASSIVAPTELR       | 2 | 110625833                               | N-Term(iTRAQ4plex), C3(Methylthio)                   | 2130.14426 | 44 | 3.54 | Expt1 |
| QLIMANPQMQLIQR           | 2 | 22726191;34328236                       | N-Term(iTRAQ4plex)                                   | 1956.06919 | 44 | 4.73 | Expt1 |
| GIPGPEGEPGPPGDLTECDVMYYR | 4 | 22203747                                | N-Term(iTRAQ4plex), C20(Methylthio), M23(Oxidation)  | 2946.34677 | 44 | 3.61 | Expt1 |
| EEIFGPMQILK              | 4 | 6753036                                 | N-Term(iTRAQ4plex), M8(Oxidation), K12(iTRAQ4plex)   | 1707.96073 | 44 | 3.00 | Expt1 |
| YQDILVFR                 | 1 | 6678131                                 | N-Term(iTRAQ4plex)                                   | 1197.67766 | 44 |      | Expt1 |
| AFSDPFVAEAK              | 2 | 112293266                               | N-Term(iTRAQ4plex), K11(iTRAQ4plex)                  | 1527.79619 | 44 | 3.52 | Expt1 |
| QAETTYENIPGR             | 1 | 29789199                                | N-Term(iTRAQ4plex)                                   | 1550.76079 | 44 |      | Expt1 |
| DLPDVQELITQVR            | 4 | 47271535                                | N-Term(iTRAQ4plex)                                   | 1669.92679 | 44 | 3.93 | Expt1 |

|                           |    |                                                                                                                   |                                                                     |            |    |      |       |
|---------------------------|----|-------------------------------------------------------------------------------------------------------------------|---------------------------------------------------------------------|------------|----|------|-------|
| DFGWPCFQPDGVEQTYAEMPK     | 2  | 31982664                                                                                                          | N-Term(iTRAQ4plex), C7(Methylthio), M20(Oxidation), K22(iTRAQ4plex) | 2974.25187 | 44 | 3.64 | Expt1 |
| LPPLPVTPGMEGAGVVAVGEGVGDR | 2  | 33859662                                                                                                          | N-Term(iTRAQ4plex), M10(Oxidation)                                  | 2633.41623 | 44 |      | Expt1 |
| AMTLEEAFAVGAER            | 2  | 226958474                                                                                                         | N-Term(iTRAQ4plex)                                                  | 1767.87558 | 44 | 3.95 | Expt1 |
| ILNPGEYR                  | 1  | 160707889                                                                                                         | N-Term(iTRAQ4plex)                                                  | 1105.61125 | 44 |      | Expt1 |
| VAEQEMQLEPITDER           | 2  | 9625023                                                                                                           | N-Term(iTRAQ4plex)                                                  | 1931.94829 | 44 | 3.02 | Expt1 |
| IVQMTEAEVR                | 2  | 161484668                                                                                                         | N-Term(iTRAQ4plex)                                                  | 1319.71123 | 44 | 3.37 | Expt1 |
| EALQLMATYLPK              | 3  | 74315975                                                                                                          | N-Term(iTRAQ4plex), K12(iTRAQ4plex)                                 | 1665.96091 | 44 | 3.03 | Expt1 |
| ETSYEALANQR               | 1  | 19482168;124486712                                                                                                | N-Term(iTRAQ4plex)                                                  | 1554.75591 | 44 |      | Expt1 |
| EEIFGPVQIMK               | 5  | 7106242;85861182                                                                                                  | N-Term(iTRAQ4plex), M11(Oxidation), K12(iTRAQ4plex)                 | 1722.93912 | 44 | 4.28 | Expt1 |
| LPVDMAYK                  | 1  | 82950147;82950149;149264086                                                                                       | N-Term(iTRAQ4plex), K8(iTRAQ4plex)                                  | 1224.70439 | 44 |      | Expt1 |
| DIASGLIGPLILCK            | 2  | 110347564;110815853                                                                                               | N-Term(iTRAQ4plex), C13(Methylthio), K14(iTRAQ4plex)                | 1747.01328 | 43 | 3.83 | Expt1 |
| LAMQEFMILPVGASSFR         | 2  | 149249466;149253386                                                                                               | N-Term(iTRAQ4plex), M7(Oxidation)                                   | 2057.07767 | 43 | 3.39 | Expt1 |
| ESIESEIR                  | 9  | 225543319;94408011                                                                                                | N-Term(iTRAQ4plex)                                                  | 1106.58367 | 43 | 3.23 | Expt1 |
| EGAIIVDPAR                | 2  | 227908790                                                                                                         | N-Term(iTRAQ4plex)                                                  | 1184.67534 | 43 | 3.38 | Expt1 |
| TDLVPAFQNLK               | 5  | 8394027                                                                                                           | N-Term(iTRAQ4plex), K12(iTRAQ4plex)                                 | 1664.93315 | 43 | 3.25 | Expt1 |
| SVFQVQSMVAR               | 3  | 6671688                                                                                                           | N-Term(iTRAQ4plex), M8(Oxidation)                                   | 1411.74883 | 43 | 3.12 | Expt1 |
| TPPLALVFR                 | 2  | 6753960                                                                                                           | N-Term(iTRAQ4plex)                                                  | 1157.71831 | 43 |      | Expt1 |
| YFFLQSVSDGR               | 2  | 47078285                                                                                                          | N-Term(iTRAQ4plex)                                                  | 1577.77568 | 43 | 2.85 | Expt1 |
| VLEEEGLAAGQGQEPQPSR       | 3  | 124486923                                                                                                         | N-Term(iTRAQ4plex)                                                  | 2381.20804 | 43 | 3.95 | Expt1 |
| VITIMQNPR                 | 3  | 6755368;149259085;149263957;94395028;94395371;149264584;149264635;82959202                                        | N-Term(iTRAQ4plex)                                                  | 1215.70061 | 43 | 2.99 | Expt1 |
| TQAPAVATT                 | 3  | 149253083;82898647;149255335;82902507;94383782;94383784;149259263;63594466;149263154;149265803;94404463;149269495 | N-Term(iTRAQ4plex)                                                  | 1003.55626 | 43 |      | Expt1 |
| TEQGPQVDETQFK             | 2  | 6753036                                                                                                           | N-Term(iTRAQ4plex), K13(iTRAQ4plex)                                 | 1794.91020 | 43 | 3.77 | Expt1 |
| DSTVAVVYDITNVNSFQQTTK     | 2  | 13195674                                                                                                          | N-Term(iTRAQ4plex), K22(iTRAQ4plex)                                 | 2717.43491 | 43 | 3.32 | Expt1 |
| ITGTNAEVMYPAQWQFQIGPCEGIR | 1  | 31982332                                                                                                          | N-Term(iTRAQ4plex), M9(Oxidation), C20(Methylthio)                  | 2853.35685 | 43 |      | Expt1 |
| VLELDPALAPVVS             | 2  | 7709982                                                                                                           | N-Term(iTRAQ4plex)                                                  | 1622.96245 | 43 | 3.76 | Expt1 |
| TIEEVVGR                  | 10 | 6753036                                                                                                           | N-Term(iTRAQ4plex)                                                  | 1046.59856 | 43 | 3.33 | Expt1 |
| EELIAELQDCEGLIVR          | 2  | 52353955                                                                                                          | N-Term(iTRAQ4plex), C10(Methylthio)                                 | 2020.03324 | 43 | 4.36 | Expt1 |
| NGNGGPGPYVQGAGTATLPR      | 3  | 146219835;146219830;146219849;146231979                                                                           | N-Term(iTRAQ4plex), N1(Deamidated), N3(Deamidated)                  | 2030.00626 | 43 | 3.71 | Expt1 |
| LLLINNAATLGDVSK           | 1  | 160333789                                                                                                         | N-Term(iTRAQ4plex), K15(iTRAQ4plex)                                 | 1830.10306 | 43 |      | Expt1 |
| VTVTPVYTVGEGVSVSAPGK      | 2  | 226423922                                                                                                         | N-Term(iTRAQ4plex), K20(iTRAQ4plex)                                 | 2235.25211 | 43 | 3.53 | Expt1 |
| AQDIEAGDGTTSVVIAGSLLDSTK  | 2  | 6753322                                                                                                           | N-Term(iTRAQ4plex), C24(Methylthio), K26(iTRAQ4plex)                | 2898.47293 | 43 | 2.85 | Expt1 |
| NQAPGQPGASQWGS            | 1  | 169790818;169790823;169790820                                                                                     | N-Term(iTRAQ4plex)                                                  | 1684.82792 | 43 |      | Expt1 |
| GLTPTGMLPSGVLSSGK         | 1  | 42415473                                                                                                          | N-Term(iTRAQ4plex), M7(Oxidation), K17(iTRAQ4plex)                  | 1876.05071 | 43 |      | Expt1 |
| LYPPSAEYDPLR              | 5  | 6753428                                                                                                           | N-Term(iTRAQ4plex)                                                  | 1564.81401 | 43 | 2.94 | Expt1 |
| IISAASEGGANVFTVSYFK       | 2  | 211065507                                                                                                         | N-Term(iTRAQ4plex), K19(iTRAQ4plex)                                 | 2249.21830 | 43 | 3.14 | Expt1 |
| SSPIYVGR                  | 4  | 6678329                                                                                                           | N-Term(iTRAQ4plex)                                                  | 1022.57652 | 43 |      | Expt1 |
| SNEDQSMGNWQIR             | 1  | 9506843;162287370;161760667                                                                                       | N-Term(iTRAQ4plex), M7(Oxidation)                                   | 1724.78020 | 43 |      | Expt1 |
| VETLSQVEVILQQAADIAR       | 2  | 114326497                                                                                                         | N-Term(iTRAQ4plex)                                                  | 2314.27512 | 43 | 4.35 | Expt1 |
| DTDAAVGDNIGYITVLFPR       | 2  | 112363072                                                                                                         | N-Term(iTRAQ4plex)                                                  | 2328.20707 | 43 | 3.87 | Expt1 |
| GGANVIVTER                | 4  | 169234958                                                                                                         | N-Term(iTRAQ4plex)                                                  | 1159.65483 | 43 | 3.84 | Expt1 |
| GFAVYFENVDDAK             | 3  | 6677975                                                                                                           | N-Term(iTRAQ4plex), K14(iTRAQ4plex)                                 | 1909.96872 | 43 | 3.27 | Expt1 |
| FIMESGAK                  | 1  | 6755372                                                                                                           | N-Term(iTRAQ4plex), K8(iTRAQ4plex)                                  | 1170.64775 | 43 |      | Expt1 |
| WLQTEVQNPSVTSK            | 1  | 31982393                                                                                                          | N-Term(iTRAQ4plex), K14(iTRAQ4plex)                                 | 1905.02983 | 43 |      | Expt1 |
| AIPNQGEILVIR              | 1  | 87299637                                                                                                          | N-Term(iTRAQ4plex)                                                  | 1466.88408 | 43 |      | Expt1 |
| EGSYSISVLVGGEEVPR         | 1  | 125347376                                                                                                         | N-Term(iTRAQ4plex)                                                  | 2058.01517 | 43 |      | Expt1 |
| AYLVSNEPMEGAFNYVQTR       | 1  | 118601068                                                                                                         | N-Term(iTRAQ4plex), M9(Oxidation)                                   | 2349.13565 | 43 |      | Expt1 |

|                                  |    |                                                         |                                                                                      |            |    |      |       |
|----------------------------------|----|---------------------------------------------------------|--------------------------------------------------------------------------------------|------------|----|------|-------|
| GGDAPAAGEDA                      | 1  | 28372479;149255974;149259193;82943174;94393570          | N-Term(iTRAQ4plex)                                                                   | 1074.48528 | 43 |      | Expt1 |
| DYFNVPYPLPK                      | 1  | 68226731                                                | N-Term(iTRAQ4plex), K11(iTRAQ4plex)                                                  | 1640.89006 | 43 |      | Expt1 |
| MTDSFTEQADQVTDVVGK               | 2  | 21312520                                                | N-Term(iTRAQ4plex), M1(Oxidation), K18(iTRAQ4plex)                                   | 2247.06937 | 43 | 3.93 | Expt1 |
| FOILEGPPESMGR                    | 2  | 33859560                                                | N-Term(iTRAQ4plex), M11(Oxidation)                                                   | 1620.81900 | 43 | 3.28 | Expt1 |
| SFQMFEIEIITK                     | 3  | 88853584                                                | N-Term(iTRAQ4plex), K12(iTRAQ4plex)                                                  | 1774.93338 | 43 | 2.93 | Expt1 |
| DFNDTSQDPDFTVVVELDK              | 2  | 110347487                                               | N-Term(iTRAQ4plex), K20(iTRAQ4plex)                                                  | 2614.28446 | 43 | 3.00 | Expt1 |
| TFFLEALR                         | 2  | 21313310                                                | N-Term(iTRAQ4plex)                                                                   | 1140.65593 | 43 |      | Expt1 |
| TVAVITSDGR                       | 3  | 19527156                                                | N-Term(iTRAQ4plex)                                                                   | 1162.65447 | 43 | 2.91 | Expt1 |
| IDGITIQAR                        | 2  | 115496850                                               | N-Term(iTRAQ4plex)                                                                   | 1130.66374 | 43 |      | Expt1 |
| GDTTTTMLR                        | 10 | 111074529                                               | N-Term(iTRAQ4plex)                                                                   | 1139.58557 | 43 | 3.22 | Expt1 |
| TLATDILMGVLK                     | 2  | 110835723;110835726                                     | N-Term(iTRAQ4plex), M8(Oxidation), K12(iTRAQ4plex)                                   | 1578.94695 | 43 | 2.98 | Expt1 |
| DSLIIIDELGR                      | 2  | 6678938                                                 | N-Term(iTRAQ4plex)                                                                   | 1387.79424 | 43 | 2.84 | Expt1 |
| VLDVDENFTELR                     | 2  | 31542956                                                | N-Term(iTRAQ4plex)                                                                   | 1593.82634 | 43 | 3.93 | Expt1 |
| SMSFQGIR                         | 2  | 82950147;82950149;149264086                             | N-Term(iTRAQ4plex)                                                                   | 1069.55705 | 43 | 3.26 | Expt1 |
| FVNLFPVEVK                       | 2  | 163644277                                               | N-Term(iTRAQ4plex), K9(iTRAQ4plex)                                                   | 1380.81389 | 43 | 3.10 | Expt1 |
| IAAANGIGR                        | 1  | 227330633                                               | N-Term(iTRAQ4plex), N5(Deamidated)                                                   | 987.57366  | 43 |      | Expt1 |
| VMAGALEGDIFIGPK                  | 2  | 8392847;22122615                                        | N-Term(iTRAQ4plex), M2(Oxidation), K15(iTRAQ4plex)                                   | 1822.00577 | 43 |      | Expt1 |
| SWLPQDCTLVDMK                    | 4  | 13385434                                                | N-Term(iTRAQ4plex), C7(Methylthio), K13(iTRAQ4plex)                                  | 1869.92539 | 43 | 2.91 | Expt1 |
| YLQTLTIAAEK                      | 2  | 7710018                                                 | N-Term(iTRAQ4plex), K12(iTRAQ4plex)                                                  | 1639.95261 | 43 | 2.97 | Expt1 |
| EGFFELIPQDLIK                    | 1  | 56699423                                                | N-Term(iTRAQ4plex), K13(iTRAQ4plex)                                                  | 1837.04265 | 43 |      | Expt1 |
| MYFPDVEFDIK                      | 1  | 61743961                                                | N-Term(iTRAQ4plex), K11(iTRAQ4plex)                                                  | 1691.86814 | 43 |      | Expt1 |
| SETDTSLIR                        | 3  | 6753324                                                 | N-Term(iTRAQ4plex)                                                                   | 1165.62224 | 43 | 2.87 | Expt1 |
| DINECETPGICMNGR                  | 3  | 118197277                                               | N-Term(iTRAQ4plex), C5(Methylthio), C11(Methylthio), M12(Oxidation), N13(Deamidated) | 1904.74656 | 43 | 3.61 | Expt1 |
| SQECYFDPPELYR                    | 3  | 153791270                                               | N-Term(iTRAQ4plex), C4(Methylthio)                                                   | 1739.75627 | 43 | 3.37 | Expt1 |
| VPNYQALLR                        | 6  | 6753484                                                 | N-Term(iTRAQ4plex)                                                                   | 1217.70966 | 43 | 3.04 | Expt1 |
| GQVCVVTGASR                      | 3  | 31980844                                                | N-Term(iTRAQ4plex), C4(Methylthio)                                                   | 1266.64202 | 43 | 2.88 | Expt1 |
| DIALNPLYR                        | 1  | 116089322                                               | N-Term(iTRAQ4plex)                                                                   | 1331.78142 | 43 |      | Expt1 |
| EFGVTTGR                         | 1  | 31560737                                                | N-Term(iTRAQ4plex)                                                                   | 1010.54277 | 43 |      | Expt1 |
| AAVDAGFVPNDMQVGQTGK              | 2  | 227500281                                               | N-Term(iTRAQ4plex), K19(iTRAQ4plex)                                                  | 2193.12558 | 43 | 3.51 | Expt1 |
| DVSVALK                          | 1  | 33239212                                                | N-Term(iTRAQ4plex), K7(iTRAQ4plex)                                                   | 1019.62993 | 43 |      | Expt1 |
| FSMPTLK                          | 1  | 61743961                                                | N-Term(iTRAQ4plex), K7(iTRAQ4plex)                                                   | 1111.65056 | 43 |      | Expt1 |
| SMLQATAEANNLAAVAGAR              | 2  | 119372304;119372300                                     | N-Term(iTRAQ4plex)                                                                   | 2003.04508 | 43 | 2.85 | Expt1 |
| VIQGFEEAALALEGVPVEGSGALQER       | 5  | 111185907                                               | N-Term(iTRAQ4plex)                                                                   | 2682.43448 | 43 | 5.66 | Expt1 |
| WQDIQNDR                         | 1  | 189458814;124487025;39204553                            | N-Term(iTRAQ4plex)                                                                   | 1315.65141 | 43 |      | Expt1 |
| LFDATLTQYVK                      | 1  | 158517895                                               | N-Term(iTRAQ4plex), K11(iTRAQ4plex)                                                  | 1586.90813 | 43 |      | Expt1 |
| NLSPGAVESDVR                     | 4  | 226823359                                               | N-Term(iTRAQ4plex)                                                                   | 1387.72942 | 43 | 3.65 | Expt1 |
| GCTVWLTGLSGAGK                   | 1  | 6754982;61098088                                        | N-Term(iTRAQ4plex), C2(Methylthio), K14(iTRAQ4plex)                                  | 1683.88872 | 43 |      | Expt1 |
| FAMNPFYEPNSPIR                   | 2  | 13384686;153791919                                      | N-Term(iTRAQ4plex)                                                                   | 1826.90776 | 43 | 3.69 | Expt1 |
| AFIGLGFGDR                       | 1  | 13384758                                                | N-Term(iTRAQ4plex)                                                                   | 1196.65776 | 43 |      | Expt1 |
| NTMAYIGFVEEK                     | 2  | 170650623                                               | N-Term(iTRAQ4plex), K12(iTRAQ4plex)                                                  | 1689.87375 | 43 | 2.97 | Expt1 |
| ETMQNLNDR                        | 7  | 149262636;154090941;118130981                           | N-Term(iTRAQ4plex), M3(Oxidation)                                                    | 1280.60588 | 43 | 3.10 | Expt1 |
| NVIIGPA                          | 4  | 6678329                                                 | N-Term(iTRAQ4plex)                                                                   | 827.51244  | 43 |      | Expt1 |
| DFTPSGIAGAFR                     | 5  | 10181184                                                | N-Term(iTRAQ4plex)                                                                   | 1382.72270 | 43 | 3.43 | Expt1 |
| DILGASDPYVR                      | 4  | 56699423                                                | N-Term(iTRAQ4plex)                                                                   | 1349.72222 | 42 | 2.99 | Expt1 |
| CAAGLAELAAR                      | 2  | 149267565;21703742                                      | N-Term(iTRAQ4plex), C1(Methylthio)                                                   | 1235.63591 | 42 | 2.95 | Expt1 |
| APLNQVFSSPLPGEAVK                | 1  | 145966915                                               | N-Term(iTRAQ4plex), K17(iTRAQ4plex)                                                  | 2042.15348 | 42 |      | Expt1 |
| ELDTLNNIIVDLQR                   | 1  | 6679671                                                 | N-Term(iTRAQ4plex)                                                                   | 1815.97502 | 42 |      | Expt1 |
| GPSRPPAAAYDTAGTFGSPLLGGGSAFTPLLR | 2  | 94379918;58082069                                       | N-Term(iTRAQ4plex)                                                                   | 3398.77842 | 42 | 2.91 | Expt1 |
| MSSYAFFVQTCR                     | 3  | 149261847;82952271;149266674;149266934;83014391;6680229 | N-Term(iTRAQ4plex), C11(Methylthio)                                                  | 1629.73870 | 42 | 3.36 | Expt1 |
| MSAYAFFVQTCR                     | 1  | 82801207;82892337;6680231                               | N-Term(iTRAQ4plex), M1(Oxidation), C11(Methylthio)                                   | 1629.73661 | 42 |      | Expt1 |

|                             |   |                                                      |                                                                                       |            |    |      |       |
|-----------------------------|---|------------------------------------------------------|---------------------------------------------------------------------------------------|------------|----|------|-------|
| TGLPISTYFSAVK               | 2 | 6680139;46909579;49355801;6754000                    | N-Term(iTRAQ4plex), K13(iTRAQ4plex)                                                   | 1671.96000 | 42 |      | Expt1 |
| GGPPFAFVFEFEDPR             | 5 | 149262253;118582271                                  | N-Term(iTRAQ4plex)                                                                    | 1708.85027 | 42 | 3.38 | Expt1 |
| TVLCGTCGQPADK               | 1 | 162287370                                            | N-Term(iTRAQ4plex), C4(Methylthio), C7(Methylthio), K13(iTRAQ4plex)                   | 1672.77983 | 42 |      | Expt1 |
| SFVLPVENPQDVSSQVISESEVR     | 1 | 163965368                                            | N-Term(iTRAQ4plex)                                                                    | 2776.42160 | 42 |      | Expt1 |
| ISTISSVR                    | 3 | 82950147;82950149;149264086                          | N-Term(iTRAQ4plex)                                                                    | 1006.60265 | 42 | 2.83 | Expt1 |
| NIIFFGK                     | 3 | 6678103                                              | N-Term(iTRAQ4plex), K7(iTRAQ4plex)                                                    | 1126.67900 | 42 | 2.86 | Expt1 |
| WPEVDDDSIEDLGEVK            | 2 | 13386092                                             | N-Term(iTRAQ4plex), K16(iTRAQ4plex)                                                   | 2134.04935 | 42 | 3.60 | Expt1 |
| MFLYADNEDR                  | 1 | 27754140                                             | N-Term(iTRAQ4plex)                                                                    | 1417.65691 | 42 |      | Expt1 |
| IVEAAENEYQTAISENYQTMSDITFK  | 1 | 6671672                                              | N-Term(iTRAQ4plex), K26(iTRAQ4plex)                                                   | 3271.56223 | 42 |      | Expt1 |
| NFAFLEFR                    | 4 | 164565377                                            | N-Term(iTRAQ4plex)                                                                    | 1187.63396 | 42 | 2.97 | Expt1 |
| NTGESASQLLDAETAER           | 2 | 22094119                                             | N-Term(iTRAQ4plex)                                                                    | 1935.94187 | 42 | 2.98 | Expt1 |
| STQDLSDVSTDEVGIPLR          | 2 | 78000177;78000175;78000173;78000179;78000154         | N-Term(iTRAQ4plex)                                                                    | 2076.04180 | 42 | 2.97 | Expt1 |
| DGNGTDFPEFLTMMSR            | 2 | 13386230                                             | N-Term(iTRAQ4plex), N3(Deamidated)                                                    | 2061.93633 | 42 | 3.22 | Expt1 |
| AAAITSDLLESLGR              | 2 | 7657429                                              | N-Term(iTRAQ4plex)                                                                    | 1560.87700 | 42 | 2.93 | Expt1 |
| IVILEYQPSK                  | 1 | 19527174                                             | N-Term(iTRAQ4plex), K10(iTRAQ4plex)                                                   | 1477.88896 | 42 |      | Expt1 |
| AFMTADLPNELIELLEK           | 1 | 51491845                                             | N-Term(iTRAQ4plex), M3(Oxidation), K17(iTRAQ4plex)                                    | 2251.21927 | 42 |      | Expt1 |
| LDLFEISQPTEDLEFHGVMR        | 2 | 145587092                                            | N-Term(iTRAQ4plex)                                                                    | 2520.26145 | 42 | 3.19 | Expt1 |
| TVALWDLR                    | 5 | 47059484;157909799                                   | N-Term(iTRAQ4plex)                                                                    | 1117.65264 | 42 | 2.99 | Expt1 |
| DCLTPMGMTSENVAER            | 2 | 18700004                                             | N-Term(iTRAQ4plex), C2(Methylthio)                                                    | 1943.84612 | 42 | 3.25 | Expt1 |
| VILQDFTGVPAVVDFAMMR         | 1 | 110347487                                            | N-Term(iTRAQ4plex)                                                                    | 2193.19571 | 42 |      | Expt1 |
| ETFGVNNVTYGDAMPSSR          | 2 | 149250295;124244040                                  | N-Term(iTRAQ4plex)                                                                    | 2316.11130 | 42 | 3.72 | Expt1 |
| ISEQFTAMFR                  | 4 | 33859488;31981939;7106439;22165384;21746161;12963615 | N-Term(iTRAQ4plex), M8(Oxidation)                                                     | 1389.69768 | 42 | 3.12 | Expt1 |
| LTLYFEGR                    | 7 | 6678329                                              | N-Term(iTRAQ4plex)                                                                    | 1142.63457 | 42 | 3.03 | Expt1 |
| DTLQSELVQGLYK               | 2 | 71061458;71061455                                    | N-Term(iTRAQ4plex), K13(iTRAQ4plex)                                                   | 1781.99979 | 42 | 3.20 | Expt1 |
| YGPLSGVNVVYDQR              | 2 | 111160869                                            | N-Term(iTRAQ4plex)                                                                    | 1710.89519 | 42 | 2.82 | Expt1 |
| AAQLAIR                     | 2 | 25742730;148225566                                   | N-Term(iTRAQ4plex)                                                                    | 886.55718  | 42 |      | Expt1 |
| DNLEFFLTNLGK                | 1 | 93102409                                             | N-Term(iTRAQ4plex), K12(iTRAQ4plex)                                                   | 1698.93692 | 42 |      | Expt1 |
| TCDGVQCAFEELVEK             | 2 | 30841008                                             | N-Term(iTRAQ4plex), C2(Methylthio), C7(Methylthio), K15(iTRAQ4plex)                   | 2050.92276 | 42 | 2.94 | Expt1 |
| VLSNEPAASAEVEEDDALVR        | 1 | 28077067                                             | N-Term(iTRAQ4plex)                                                                    | 2458.21781 | 42 |      | Expt1 |
| IGLFYMDNDLITR               | 2 | 46049022                                             | N-Term(iTRAQ4plex)                                                                    | 1714.89873 | 42 | 3.50 | Expt1 |
| NTENGSPASTAPTQDNR           | 1 | 149261303;21362321                                   | N-Term(iTRAQ4plex), N4(Deamidated)                                                    | 1904.87395 | 42 |      | Expt1 |
| GLAGAVSELLR                 | 2 | 227116327                                            | N-Term(iTRAQ4plex)                                                                    | 1229.73784 | 42 | 3.60 | Expt1 |
| SELDMLDIR                   | 3 | 31981302;158966670                                   | N-Term(iTRAQ4plex)                                                                    | 1235.64385 | 42 | 3.32 | Expt1 |
| VINQILTEMDGMSTK             | 2 | 225543319;94408011                                   | N-Term(iTRAQ4plex), M12(Oxidation), K15(iTRAQ4plex)                                   | 1984.04203 | 42 | 3.23 | Expt1 |
| ALVSSVR                     | 4 | 163310765                                            | N-Term(iTRAQ4plex)                                                                    | 875.54753  | 42 |      | Expt1 |
| IAEQVASFQEEK                | 2 | 6753294                                              | N-Term(iTRAQ4plex), K12(iTRAQ4plex)                                                   | 1666.89273 | 42 | 3.71 | Expt1 |
| LLPIDGANDLFFQPPPLTPTSK      | 2 | 15011884                                             | N-Term(iTRAQ4plex), K22(iTRAQ4plex)                                                   | 2669.48618 | 42 | 3.68 | Expt1 |
| TALVSADGEEVAVK              | 1 | 113195686                                            | N-Term(iTRAQ4plex), K14(iTRAQ4plex)                                                   | 1676.93144 | 42 |      | Expt1 |
| GVFVITFK                    | 1 | 146260280;6754222                                    | N-Term(iTRAQ4plex), K8(iTRAQ4plex)                                                    | 1246.75725 | 42 |      | Expt1 |
| EIEIPLQR                    | 1 | 31980942                                             | N-Term(iTRAQ4plex)                                                                    | 1254.75408 | 42 |      | Expt1 |
| VYSTSVTGSR                  | 7 | 18017602                                             | N-Term(iTRAQ4plex)                                                                    | 1200.63408 | 42 | 3.21 | Expt1 |
| SELVAMLEEEELR               | 1 | 153792526                                            | N-Term(iTRAQ4plex), M6(Oxidation)                                                     | 1707.86199 | 42 |      | Expt1 |
| LTEETVCLDLDK                | 1 | 82950147;82950149;149264086                          | N-Term(iTRAQ4plex), C8(Methylthio), K13(iTRAQ4plex)                                   | 1841.90897 | 42 |      | Expt1 |
| LVIYVCDPVMGDK               | 1 | 26006861                                             | N-Term(iTRAQ4plex), C5(Methylthio), K12(iTRAQ4plex)                                   | 1672.84429 | 42 |      | Expt1 |
| MVVVPAALFTPLK               | 1 | 67906177                                             | N-Term(iTRAQ4plex), K13(iTRAQ4plex)                                                   | 1674.02213 | 42 |      | Expt1 |
| NMVPQQALVIR                 | 2 | 21450277;30409956;226958351;21450321                 | N-Term(iTRAQ4plex), N1(Deamidated)                                                    | 1413.80010 | 42 | 2.92 | Expt1 |
| AASDLQIAASTFTSFGK           | 1 | 17157983                                             | N-Term(iTRAQ4plex), K17(iTRAQ4plex)                                                   | 2003.07657 | 42 |      | Expt1 |
| FMNSGQTCVAPDYILCDPSIQNEIVEK | 2 | 163310769                                            | N-Term(iTRAQ4plex), C8(Methylthio), Y13(iTRAQ4plex), C16(Methylthio), K27(iTRAQ4plex) | 3538.67910 | 42 | 3.73 | Expt1 |

|                                |    |                                                                                                                                                          |                                                                                       |            |    |      |       |
|--------------------------------|----|----------------------------------------------------------------------------------------------------------------------------------------------------------|---------------------------------------------------------------------------------------|------------|----|------|-------|
| NLIILEK                        | 1  | 126518317                                                                                                                                                | N-Term(iTRAQ4plex), K9(iTRAQ4plex)                                                    | 1394.85869 | 42 |      | Expt1 |
| GCITIIGGDDATCCAK               | 1  | 70778976                                                                                                                                                 | N-Term(iTRAQ4plex), C2(Methylthio), C14(Methylthio), C15(Methylthio), K17(iTRAQ4plex) | 2009.89263 | 42 |      | Expt1 |
| LGMPQFLSPEAQSLLR               | 6  | 22507357                                                                                                                                                 | N-Term(iTRAQ4plex)                                                                    | 1931.05400 | 42 | 3.15 | Expt1 |
| YLGAEYMQSVGNMR                 | 2  | 20330802                                                                                                                                                 | N-Term(iTRAQ4plex), M7(Oxidation), M13(Oxidation)                                     | 1794.82834 | 42 |      | Expt1 |
| AVTPLYPANQADIIFDITEGNLR        | 2  | 168693628                                                                                                                                                | N-Term(iTRAQ4plex)                                                                    | 2675.42063 | 42 | 3.43 | Expt1 |
| NALIP                          | 1  | 39652626                                                                                                                                                 | N-Term(iTRAQ4plex)                                                                    | 671.42163  | 42 |      | Expt1 |
| VAGPQAQGTGAPQGSGLGEYLFER       | 2  | 82935680;149264343;149264482;82982537;130485277                                                                                                          | N-Term(iTRAQ4plex)                                                                    | 2517.29221 | 42 | 3.40 | Expt1 |
| ATIDPETGLLFLSLSK               | 2  | 37537522                                                                                                                                                 | N-Term(iTRAQ4plex), K16(iTRAQ4plex)                                                   | 1993.15573 | 42 | 3.13 | Expt1 |
| ISLNSLCYGDMDK                  | 1  | 25141335                                                                                                                                                 | N-Term(iTRAQ4plex), C7(Methylthio), K13(iTRAQ4plex)                                   | 1792.85501 | 42 |      | Expt1 |
| TNGKEPELLEPIPYEFMA             | 1  | 14924911;82885114;149251901;149251962;149255371;149257782;149259532;149262565;82949522;38075571;51770297;149269802;149270175;83013315;94410221;162417994 | N-Term(iTRAQ4plex), N2(Deamidated), K4(iTRAQ4plex)                                    | 2367.21416 | 42 |      | Expt1 |
| LWDDGIIDPVDR                   | 2  | 73622267                                                                                                                                                 | N-Term(iTRAQ4plex)                                                                    | 1658.85271 | 42 | 3.46 | Expt1 |
| LAACGPPDPAPCAELVR              | 8  | 31982260                                                                                                                                                 | N-Term(iTRAQ4plex), C4(Methylthio), C12(Methylthio)                                   | 1915.90281 | 42 | 3.65 | Expt1 |
| DTNGENIAESLVAEGLATR            | 5  | 77404392                                                                                                                                                 | N-Term(iTRAQ4plex), N6(Deamidated)                                                    | 2105.04563 | 42 | 3.42 | Expt1 |
| LTDQVMQNQVLAALQER              | 3  | 6679012                                                                                                                                                  | N-Term(iTRAQ4plex), M6(Oxidation)                                                     | 2214.16587 | 42 | 3.83 | Expt1 |
| LTQEPEISR                      | 3  | 30794164                                                                                                                                                 | N-Term(iTRAQ4plex)                                                                    | 1216.66509 | 42 | 3.31 | Expt1 |
| IMLNTPEVDVALVSGK               | 2  | 134053905                                                                                                                                                | N-Term(iTRAQ4plex), K16(iTRAQ4plex)                                                   | 2003.11338 | 42 | 3.00 | Expt1 |
| VGEGFEEETVDGR                  | 1  | 7304975                                                                                                                                                  | N-Term(iTRAQ4plex)                                                                    | 1567.73747 | 42 |      | Expt1 |
| ADIGVAMGIVGSDVSK               | 2  | 21450277                                                                                                                                                 | N-Term(iTRAQ4plex), K16(iTRAQ4plex)                                                   | 1806.98655 | 42 | 3.65 | Expt1 |
| VVLPTFILEPR                    | 1  | 51243034;51243036                                                                                                                                        | N-Term(iTRAQ4plex)                                                                    | 1427.87871 | 42 |      | Expt1 |
| MFFDAELSQMTHVSDTSVVLMSMDNNR    | 7  | 20911031                                                                                                                                                 | N-Term(iTRAQ4plex), M1(Oxidation), M10(Oxidation), M23(Oxidation)                     | 3294.48703 | 42 | 5.03 | Expt1 |
| AQTYELQESNVR                   | 3  | 226442740;67906175                                                                                                                                       | N-Term(iTRAQ4plex)                                                                    | 1581.80303 | 42 | 3.43 | Expt1 |
| STSAPQMSPGSSDNQSSSPQAQQK       | 2  | 33239421;260166704;260166709;260166715;260166706;260166711                                                                                               | N-Term(iTRAQ4plex), M7(Oxidation), K25(iTRAQ4plex)                                    | 2836.32767 | 42 | 2.88 | Expt1 |
| NLPGLVQEGEPFSEEATLFTK          | 3  | 77404392                                                                                                                                                 | N-Term(iTRAQ4plex), K21(iTRAQ4plex)                                                   | 2594.37210 | 42 | 4.54 | Expt1 |
| ALLGPAPEDEDEPAADDDPGDQALGAGEPR | 1  | 72384371                                                                                                                                                 | N-Term(iTRAQ4plex)                                                                    | 3074.43418 | 42 |      | Expt1 |
| GANDFMCDemer                   | 2  | 110625624                                                                                                                                                | N-Term(iTRAQ4plex), C7(Methylthio)                                                    | 1607.60796 | 42 | 3.64 | Expt1 |
| DLSGPDAETLLK                   | 2  | 118130785;118130771                                                                                                                                      | N-Term(iTRAQ4plex), K12(iTRAQ4plex)                                                   | 1546.85735 | 42 | 2.94 | Expt1 |
| LIESAEELIR                     | 5  | 31542563                                                                                                                                                 | N-Term(iTRAQ4plex)                                                                    | 1316.75884 | 42 | 3.31 | Expt1 |
| TDQVCINLR                      | 14 | 149261823;164607147                                                                                                                                      | N-Term(iTRAQ4plex), C5(Methylthio)                                                    | 1251.63262 | 42 | 3.94 | Expt1 |
| YFYFYNTGLQNQR                  | 4  | 6755152                                                                                                                                                  | N-Term(iTRAQ4plex)                                                                    | 1857.90763 | 42 | 3.65 | Expt1 |
| SFPNPPDYEAASAAAGLAAGSAEETGR    | 1  | 149255522;19526936                                                                                                                                       | N-Term(iTRAQ4plex)                                                                    | 2898.36985 | 42 |      | Expt1 |
| MILLEVNNR                      | 3  | 112363072;149268562                                                                                                                                      | N-Term(iTRAQ4plex), M1(Oxidation)                                                     | 1261.70793 | 42 | 2.84 | Expt1 |
| SEIIPMFSNLASDEQDSVR            | 3  | 8394027                                                                                                                                                  | N-Term(iTRAQ4plex), M6(Oxidation)                                                     | 2298.10600 | 42 | 4.45 | Expt1 |
| DIVDDDDDDLER                   | 1  | 217272818;217035166                                                                                                                                      | N-Term(iTRAQ4plex)                                                                    | 1693.72173 | 42 |      | Expt1 |
| DFPEYTFIAI DEEDYATEVK          | 3  | 86198316                                                                                                                                                 | N-Term(iTRAQ4plex), K20(iTRAQ4plex)                                                   | 2641.25241 | 42 | 3.23 | Expt1 |
| LADALQELR                      | 5  | 9506843;162287370;161760667                                                                                                                              | N-Term(iTRAQ4plex)                                                                    | 1172.67803 | 42 | 3.13 | Expt1 |
| SGQAGYVPCNILAEAR               | 2  | 21040233                                                                                                                                                 | N-Term(iTRAQ4plex), C9(Methylthio)                                                    | 1838.90508 | 42 | 3.11 | Expt1 |
| CNEIISWLDK                     | 2  | 31981690;83024101                                                                                                                                        | N-Term(iTRAQ4plex), C1(Methylthio), K10(iTRAQ4plex)                                   | 1554.79117 | 42 | 2.93 | Expt1 |
| NSLFDQFR                       | 2  | 33563252;167555029                                                                                                                                       | N-Term(iTRAQ4plex)                                                                    | 1170.60222 | 42 | 2.91 | Expt1 |
| TVAATNMNNEESSR                 | 1  | 124487163;120300944                                                                                                                                      | N-Term(iTRAQ4plex), M7(Oxidation)                                                     | 1569.73393 | 42 |      | Expt1 |
| EAEELAAASGGQSPTEGQIPQFQQR      | 1  | 169234940                                                                                                                                                | N-Term(iTRAQ4plex)                                                                    | 2831.36112 | 42 |      | Expt1 |
| VVGPISGADLHGMLEIPDLR           | 2  | 169234958                                                                                                                                                | N-Term(iTRAQ4plex)                                                                    | 2233.21268 | 42 | 3.85 | Expt1 |
| EISFAYEVLNPEK                  | 2  | 9789937                                                                                                                                                  | N-Term(iTRAQ4plex), K14(iTRAQ4plex)                                                   | 1914.01242 | 41 | 3.95 | Expt1 |
| DIVVAETLEDLKD                  | 2  | 188035858                                                                                                                                                | N-Term(iTRAQ4plex), K13(iTRAQ4plex)                                                   | 1747.95847 | 41 | 3.00 | Expt1 |
| TIGGGDDSTFFCETGAGK             | 1  | 6678467                                                                                                                                                  | N-Term(iTRAQ4plex), C14(Methylthio), K20(iTRAQ4plex)                                  | 2345.07987 | 41 |      | Expt1 |
| LVTLEEFRL                      | 2  | 153792449;194440700                                                                                                                                      | N-Term(iTRAQ4plex)                                                                    | 1263.74455 | 41 | 2.98 | Expt1 |
| GLEVTAYSPLGSSDR                | 3  | 149252910;10946870                                                                                                                                       | N-Term(iTRAQ4plex)                                                                    | 1695.87261 | 41 | 3.72 | Expt1 |

|                           |   |                                                                                               |                                                     |            |    |      |       |
|---------------------------|---|-----------------------------------------------------------------------------------------------|-----------------------------------------------------|------------|----|------|-------|
| GASQAGMLAPGTR             | 1 | 149251847;21312564                                                                            | N-Term(iTRAQ4plex), M7(Oxidation)                   | 1376.71001 | 41 |      | Expt1 |
| NGVQAMVEFDSVQSAQR         | 4 | 183980004                                                                                     | N-Term(iTRAQ4plex), N1(Deamidated), M6(Oxidation)   | 2026.96415 | 41 | 2.85 | Expt1 |
| AALGYNILTQEEAQSVDYAK      | 2 | 22122667                                                                                      | N-Term(iTRAQ4plex), K20(iTRAQ4plex)                 | 2472.29239 | 41 | 4.54 | Expt1 |
| SFCSMAGPNLAIAGSSESAQK     | 2 | 38371755                                                                                      | N-Term(iTRAQ4plex), C3(Methylthio), K21(iTRAQ4plex) | 2432.18863 | 41 | 3.63 | Expt1 |
| DLAGSIIGK                 | 2 | 13384620                                                                                      | N-Term(iTRAQ4plex), K9(iTRAQ4plex)                  | 1161.70220 | 41 | 3.60 | Expt1 |
| EVAELAEICGSLIQK           | 1 | 31560705                                                                                      | N-Term(iTRAQ4plex), C8(Methylthio), K16(iTRAQ4plex) | 1994.05844 | 41 |      | Expt1 |
| EGMNIVEAMER               | 8 | 6679439                                                                                       | N-Term(iTRAQ4plex), M3(Oxidation), M9(Oxidation)    | 1454.67436 | 41 | 3.56 | Expt1 |
| VVAEPVELAQEFR             | 3 | 82934613;149262115;58037117                                                                   | N-Term(iTRAQ4plex)                                  | 1630.88896 | 41 | 3.15 | Expt1 |
| CQALDMTEMAR               | 2 | 12963497;156231023;156231021                                                                  | N-Term(iTRAQ4plex), C1(Methylthio)                  | 1458.63542 | 41 | 3.78 | Expt1 |
| LESTLNYGMER               | 2 | 29789080                                                                                      | N-Term(iTRAQ4plex)                                  | 1456.72710 | 41 | 2.83 | Expt1 |
| VNLQMVYDSPVCR             | 2 | 162138894                                                                                     | N-Term(iTRAQ4plex), C12(Methylthio)                 | 1713.83293 | 41 | 3.27 | Expt1 |
| DIALEITVTNNSPDP           | 3 | 31982236                                                                                      | N-Term(iTRAQ4plex)                                  | 1871.98882 | 41 | 2.88 | Expt1 |
| LNLVADLVEEAQESVSK         | 2 | 6753812                                                                                       | N-Term(iTRAQ4plex), K17(iTRAQ4plex)                 | 2132.17179 | 41 | 2.92 | Expt1 |
| DMLEASILDITYLGGK          | 1 | 126723461                                                                                     | N-Term(iTRAQ4plex), M2(Oxidation), K14(iTRAQ4plex)  | 1872.99259 | 41 |      | Expt1 |
| EFSGYVESGLK               | 2 | 160707958                                                                                     | N-Term(iTRAQ4plex), K11(iTRAQ4plex)                 | 1503.80120 | 41 | 3.28 | Expt1 |
| AQPSASLVGVYR              | 2 | 86262142                                                                                      | N-Term(iTRAQ4plex)                                  | 1349.72978 | 41 | 3.27 | Expt1 |
| GDSETDLEALFNAVMNPK        | 2 | 6678615;283945493                                                                             | N-Term(iTRAQ4plex), K18(iTRAQ4plex)                 | 2239.12442 | 41 | 3.84 | Expt1 |
| SMVEDITGLR                | 1 | 82950147;82950149;149264086                                                                   | N-Term(iTRAQ4plex), M2(Oxidation)                   | 1280.66362 | 41 |      | Expt1 |
| VLQLTSWDEDAWASK           | 1 | 31543942                                                                                      | N-Term(iTRAQ4plex), K15(iTRAQ4plex)                 | 2037.05912 | 41 |      | Expt1 |
| LLMMAGIDDCYTSAR           | 1 | 149253083;82898647;149255335;82902507;94383782;94383784;149259263;63594466;149265803;94404463 | N-Term(iTRAQ4plex), M3(Oxidation), C10(Methylthio)  | 1865.84429 | 41 |      | Expt1 |
| DIQTVLSR                  | 1 | 83020812;35215317                                                                             | N-Term(iTRAQ4plex)                                  | 1188.70867 | 41 |      | Expt1 |
| GTSFEAAATSGGSASSEK        | 2 | 227500281                                                                                     | N-Term(iTRAQ4plex), K18(iTRAQ4plex)                 | 1932.94919 | 41 | 4.55 | Expt1 |
| WIVPGGMEPEEPPSVA AVR      | 2 | 149269103;9789933                                                                             | N-Term(iTRAQ4plex)                                  | 2254.13384 | 41 | 3.10 | Expt1 |
| LEAELGNMQGLVEDFK          | 1 | 114145561                                                                                     | N-Term(iTRAQ4plex), K16(iTRAQ4plex)                 | 2081.09184 | 41 |      | Expt1 |
| LPETSLFETEETR             | 3 | 82916992;16716381;195963321                                                                   | N-Term(iTRAQ4plex)                                  | 1695.85820 | 41 | 3.62 | Expt1 |
| YSPFFVFG EK               | 2 | 150456419                                                                                     | N-Term(iTRAQ4plex), K11(iTRAQ4plex)                 | 1605.86724 | 41 | 2.92 | Expt1 |
| AESEVANLR                 | 2 | 112421039                                                                                     | N-Term(iTRAQ4plex)                                  | 1132.60918 | 41 | 2.82 | Expt1 |
| GVNTGAVGSYIYDKDPEGTVQP    | 1 | 13195646                                                                                      | N-Term(iTRAQ4plex), K14(iTRAQ4plex)                 | 2555.29337 | 41 |      | Expt1 |
| VLVDQTTGLSR               | 2 | 31542602                                                                                      | N-Term(iTRAQ4plex)                                  | 1332.76189 | 41 | 3.22 | Expt1 |
| LMDLLADSR                 | 2 | 23956096                                                                                      | N-Term(iTRAQ4plex)                                  | 1177.63481 | 41 | 3.14 | Expt1 |
| SGAVDACQGDGGPLVQEDSR      | 1 | 149253796;21704106                                                                            | N-Term(iTRAQ4plex), C7(Methylthio)                  | 2237.99045 | 41 |      | Expt1 |
| AGLQLF                    | 4 | 71979675                                                                                      | N-Term(iTRAQ4plex), Q4(Deamidated)                  | 793.45769  | 41 |      | Expt1 |
| EFDPTITDGLSGPSR           | 1 | 21704156                                                                                      | N-Term(iTRAQ4plex)                                  | 1822.89482 | 41 |      | Expt1 |
| GWPLYLSTK                 | 2 | 162417975                                                                                     | N-Term(iTRAQ4plex), K9(iTRAQ4plex)                  | 1352.78948 | 41 | 3.41 | Expt1 |
| DSFPNLFACK                | 2 | 13385322                                                                                      | N-Term(iTRAQ4plex), C9(Methylthio), K10(iTRAQ4plex) | 1475.73186 | 41 | 3.26 | Expt1 |
| QEYEMQLDVNAK              | 1 | 148277039                                                                                     | N-Term(iTRAQ4plex), K12(iTRAQ4plex)                 | 1755.88547 | 41 |      | Expt1 |
| GAIVPAQEVPPPTVPM DYSWAR   | 1 | 29293809                                                                                      | N-Term(iTRAQ4plex)                                  | 2525.30254 | 41 |      | Expt1 |
| SSEMNVLIPTEGGDFNEFPVPEQFK | 9 | 157951604                                                                                     | N-Term(iTRAQ4plex), K25(iTRAQ4plex)                 | 3099.52219 | 41 | 3.96 | Expt1 |
| FNADEFEDMVAEK             | 7 | 149249582;149249685;149259021                                                                 | N-Term(iTRAQ4plex), M9(Oxidation), K13(iTRAQ4plex)  | 1848.85819 | 41 | 3.34 | Expt1 |
| GTGFLSIEPLDPR             | 2 | 149269273;94409900;94409902;94409904;126215532;157951698                                      | N-Term(iTRAQ4plex)                                  | 1545.84245 | 41 | 2.94 | Expt1 |
| VAVNILNNGR                | 2 | 23956084                                                                                      | N-Term(iTRAQ4plex), N8(Deamidated)                  | 1214.69658 | 41 | 2.90 | Expt1 |
| ISQTN YIPTQQDVLR          | 3 | 33563256                                                                                      | N-Term(iTRAQ4plex)                                  | 1920.02776 | 41 | 3.28 | Expt1 |
| GPCIYNEDNGIIK             | 2 | 30794450                                                                                      | N-Term(iTRAQ4plex), C3(Methylthio), K14(iTRAQ4plex) | 1882.97055 | 41 | 4.03 | Expt1 |
| GFGFVCFSSPEEATK           | 5 | 22507391;34419622;6754972;31560656;166157896;255652857                                        | N-Term(iTRAQ4plex), C6(Methylthio), K15(iTRAQ4plex) | 1939.91631 | 41 | 4.22 | Expt1 |
| GYFEYIEENK                | 2 | 160333923                                                                                     | N-Term(iTRAQ4plex), K10(iTRAQ4plex)                 | 1579.78777 | 41 | 3.34 | Expt1 |
| GPESLAQEQMEGMLCR          | 1 | 55926127                                                                                      | N-Term(iTRAQ4plex), C15(Methylthio)                 | 1968.87969 | 41 |      | Expt1 |



|                               |   |                                                                                      |                                                                                                        |            |    |      |       |
|-------------------------------|---|--------------------------------------------------------------------------------------|--------------------------------------------------------------------------------------------------------|------------|----|------|-------|
| YPENFFLLR                     | 3 | 161484668;31980772;1399419<br>5;94392631                                             | N-Term(iTRAQ4plex)                                                                                     | 1342.72966 | 41 | 2.95 | Expt1 |
| TLESSIQGLR                    | 1 | 9790221                                                                              | N-Term(iTRAQ4plex)                                                                                     | 1247.70879 | 41 |      | Expt1 |
| QQIESYPTDSILEDQSDQR           | 1 | 6755578                                                                              | N-Term(iTRAQ4plex)                                                                                     | 2396.13481 | 41 |      | Expt1 |
| VIAALLQTMEDQGNQR              | 2 | 29789199;149272031                                                                   | N-Term(iTRAQ4plex)                                                                                     | 1931.01303 | 41 | 3.28 | Expt1 |
| ALEDVCIETIEAGFMTK             | 2 | 162417975                                                                            | N-Term(iTRAQ4plex), C6(Methylthio), M15(Oxidation),<br>K17(iTRAQ4plex)                                 | 2220.08677 | 41 | 3.88 | Expt1 |
| FINLFPETK                     | 2 | 6671561;116256510                                                                    | N-Term(iTRAQ4plex), K9(iTRAQ4plex)                                                                     | 1396.81548 | 41 | 3.13 | Expt1 |
| ELIPQYLAELQSPEEMAR            | 1 | 28077067                                                                             | N-Term(iTRAQ4plex)                                                                                     | 2261.16098 | 41 |      | Expt1 |
| LSVQCLLH                      | 1 | 21536248                                                                             | N-Term(iTRAQ4plex), C5(Methylthio)                                                                     | 1102.58721 | 41 |      | Expt1 |
| GQVYILGR                      | 9 | 6996911                                                                              | N-Term(iTRAQ4plex)                                                                                     | 1049.62285 | 41 | 3.32 | Expt1 |
| VLPSCDLAR                     | 1 | 31980844                                                                             | N-Term(iTRAQ4plex), C5(Methylthio)                                                                     | 1163.60198 | 41 |      | Expt1 |
| GECQSEGLVFFQGNR               | 2 | 160358829                                                                            | N-Term(iTRAQ4plex), C3(Methylthio)                                                                     | 1860.85105 | 41 | 3.78 | Expt1 |
| AALQAADCEVEQWNSDDPIPR         | 2 | 17933768                                                                             | N-Term(iTRAQ4plex), C9(Methylthio)                                                                     | 2589.19187 | 41 |      | Expt1 |
| ENVIMTQILPCIK                 | 2 | 8394027                                                                              | N-Term(iTRAQ4plex), C11(Methylthio), K13(iTRAQ4plex)                                                   | 1836.01426 | 41 | 3.81 | Expt1 |
| DLEAISAR                      | 1 | 55926127                                                                             | N-Term(iTRAQ4plex)                                                                                     | 1018.56841 | 41 |      | Expt1 |
| GYDVDFPR                      | 1 | 7305085;7305087                                                                      | N-Term(iTRAQ4plex)                                                                                     | 1112.55229 | 41 |      | Expt1 |
| VIQPTSGMIGNLSMTPELSSAHNVIVTER | 2 | 169234958                                                                            | N-Term(iTRAQ4plex)                                                                                     | 3225.68222 | 41 | 4.55 | Expt1 |
| QQIQSIQSIER                   | 3 | 82930015;149249829;1492596<br>13                                                     | N-Term(iTRAQ4plex)                                                                                     | 1601.87432 | 41 | 3.30 | Expt1 |
| VMTIPYQMPASSPVICAGQDR         | 4 | 6754994                                                                              | N-Term(iTRAQ4plex), M2(Oxidation), C17(Methylthio)                                                     | 2624.25107 | 41 | 3.48 | Expt1 |
| LFTYDSIK                      | 1 | 149245807;164518893                                                                  | N-Term(iTRAQ4plex), K8(iTRAQ4plex)                                                                     | 1274.72197 | 41 |      | Expt1 |
| AMTTGAIAMLSLILYSR             | 1 | 7242197                                                                              | N-Term(iTRAQ4plex)                                                                                     | 2015.08316 | 41 |      | Expt1 |
| FNEEHIPDSPFVVPVSPSGDAR        | 2 | 125347376                                                                            | N-Term(iTRAQ4plex)                                                                                     | 2611.29709 | 41 | 3.70 | Expt1 |
| LVQAAQLQSDPYSVPAR             | 2 | 31543942                                                                             | N-Term(iTRAQ4plex)                                                                                     | 2118.12577 | 41 | 3.07 | Expt1 |
| EELTLEGIR                     | 1 | 21450625;149270417;2268233<br>09                                                     | N-Term(iTRAQ4plex)                                                                                     | 1203.66875 | 41 |      | Expt1 |
| AISTLNGLR                     | 3 | 31542602                                                                             | N-Term(iTRAQ4plex), N6(Deamidated)                                                                     | 1089.63945 | 41 | 3.09 | Expt1 |
| VIDLDEEFSNWK                  | 1 | 169234958;32129201;3212920<br>5                                                      | N-Term(iTRAQ4plex), K13(iTRAQ4plex)                                                                    | 1897.94602 | 41 |      | Expt1 |
| AGEQLAPFLPQLVPR               | 2 | 37718970                                                                             | N-Term(iTRAQ4plex)                                                                                     | 1780.02898 | 40 | 3.26 | Expt1 |
| AQMQEAMTQEVSDFSDTTPIK         | 2 | 31543942                                                                             | N-Term(iTRAQ4plex), K23(iTRAQ4plex)                                                                    | 2845.39066 | 40 | 3.94 | Expt1 |
| AFAEAAGSAETLSVEK              | 2 | 9790167                                                                              | N-Term(iTRAQ4plex), K16(iTRAQ4plex)                                                                    | 1868.99309 | 40 | 3.85 | Expt1 |
| TSGLQGEFDAR                   | 5 | 124487057                                                                            | N-Term(iTRAQ4plex)                                                                                     | 1324.65886 | 40 | 3.48 | Expt1 |
| AELNPWPEYINTR                 | 2 | 27229277                                                                             | N-Term(iTRAQ4plex)                                                                                     | 1746.89702 | 40 | 4.11 | Expt1 |
| NADMSEEMQQDSVECATQALEK        | 1 | 213688406                                                                            | N-Term(iTRAQ4plex), M4(Oxidation), M8(Oxidation),<br>C15(Methylthio), K22(iTRAQ4plex)                  | 2823.20505 | 40 |      | Expt1 |
| NADMSEEMQQNSVECATQALEK        | 1 | 82998589                                                                             | N-Term(iTRAQ4plex), M4(Oxidation), M8(Oxidation),<br>N11(Deamidated), C15(Methylthio), K22(iTRAQ4plex) | 2823.20505 | 40 |      | Expt1 |
| EYQELMNVK                     | 2 | 29789317;149266993;8570168<br>0;54607171;113195684;114145<br>561;225903444;269914154 | N-Term(iTRAQ4plex), M6(Oxidation), K9(iTRAQ4plex)                                                      | 1457.76494 | 40 | 3.43 | Expt1 |
| TYEAALETIQNMSK                | 5 | 134053905                                                                            | N-Term(iTRAQ4plex), K14(iTRAQ4plex)                                                                    | 1886.98331 | 40 | 3.75 | Expt1 |
| QAIPLDQNEGIYQDVK              | 1 | 239052674                                                                            | N-Term(iTRAQ4plex), K17(iTRAQ4plex)                                                                    | 2218.20517 | 40 |      | Expt1 |
| SAPAACLCIPADPEAVAK            | 3 | 111185907                                                                            | N-Term(iTRAQ4plex), C6(Methylthio), C8(Methylthio),<br>K19(iTRAQ4plex)                                 | 2204.08683 | 40 | 4.25 | Expt1 |
| QLTQPETS YGR                  | 4 | 7304993;226423871;22642387<br>3                                                      | N-Term(iTRAQ4plex)                                                                                     | 1423.73247 | 40 | 3.64 | Expt1 |
| LNFVASR                       | 2 | 112293264                                                                            | N-Term(iTRAQ4plex)                                                                                     | 1021.59227 | 40 |      | Expt1 |
| IGLAQYSGDPR                   | 2 | 226423922                                                                            | N-Term(iTRAQ4plex)                                                                                     | 1320.70366 | 40 | 3.46 | Expt1 |
| GSGIQWDLR                     | 1 | 23346461                                                                             | N-Term(iTRAQ4plex)                                                                                     | 1175.63323 | 40 |      | Expt1 |
| YLT VATVFR                    | 1 | 83030206;27754056;12963615                                                           | N-Term(iTRAQ4plex)                                                                                     | 1213.70793 | 40 |      | Expt1 |
| ESFEQSVR                      | 1 | 84875537                                                                             | N-Term(iTRAQ4plex)                                                                                     | 1054.53105 | 40 |      | Expt1 |
| LFLSYDYAVR                    | 2 | 13385294                                                                             | N-Term(iTRAQ4plex)                                                                                     | 1390.75334 | 40 | 3.24 | Expt1 |
| YATLATVSR                     | 2 | 134288917                                                                            | N-Term(iTRAQ4plex)                                                                                     | 1125.63799 | 40 | 2.90 | Expt1 |
| LVVAPDADAR                    | 1 | 12963579                                                                             | N-Term(iTRAQ4plex)                                                                                     | 1170.66106 | 40 |      | Expt1 |
| LLIYNPEDPPGSEVLR              | 1 | 27370510                                                                             | N-Term(iTRAQ4plex)                                                                                     | 1956.05754 | 40 |      | Expt1 |

|                               |   |                                        |                                                                    |            |    |      |       |
|-------------------------------|---|----------------------------------------|--------------------------------------------------------------------|------------|----|------|-------|
| VMVQPINLIFR                   | 3 | 27883844                               | N-Term(iTRAQ4plex)                                                 | 1473.87602 | 40 | 3.56 | Expt1 |
| LGLPQDQDDPSLLVNK              | 2 | 162417980                              | N-Term(iTRAQ4plex), K16(iTRAQ4plex)                                | 2040.12650 | 40 | 3.10 | Expt1 |
| TVQFEENGR                     | 2 | 6753320                                | N-Term(iTRAQ4plex), N7(Deamidated)                                 | 1224.59795 | 40 |      | Expt1 |
| YALSNSIGPVR                   | 2 | 171543883                              | N-Term(iTRAQ4plex)                                                 | 1320.73992 | 40 | 3.21 | Expt1 |
| TLASLSPETSLFIIASK             | 3 | 94380203;254553458                     | N-Term(iTRAQ4plex), K17(iTRAQ4plex)                                | 2066.20017 | 40 | 3.41 | Expt1 |
| SQDDIIPPSR                    | 3 | 226423922                              | N-Term(iTRAQ4plex)                                                 | 1271.67339 | 40 | 3.09 | Expt1 |
| AVVVNAAQLASYSQSK              | 1 | 21312994                               | N-Term(iTRAQ4plex), K16(iTRAQ4plex)                                | 1924.07195 | 40 |      | Expt1 |
| AGNWAAIYQDIR                  | 2 | 133505845                              | N-Term(iTRAQ4plex)                                                 | 1521.79924 | 40 | 3.31 | Expt1 |
| ETVGDLEAMNEMNDELQENAR         | 1 | 118601017                              | N-Term(iTRAQ4plex), M12(Oxidation)                                 | 2568.14151 | 40 |      | Expt1 |
| DTANWLEINPETGAIFTR            | 7 | 6753374                                | N-Term(iTRAQ4plex)                                                 | 2192.11521 | 40 | 3.84 | Expt1 |
| DVVILPETK                     | 1 | 148747189                              | N-Term(iTRAQ4plex), K9(iTRAQ4plex)                                 | 1301.80058 | 40 |      | Expt1 |
| LDFIGVEGSNYPR                 | 2 | 33239421;260166704;260166706;260166711 | N-Term(iTRAQ4plex)                                                 | 1610.83135 | 40 | 3.56 | Expt1 |
| GELVPLDTVLDMLR                | 1 | 10946936                               | N-Term(iTRAQ4plex), M12(Oxidation)                                 | 1730.95145 | 40 |      | Expt1 |
| ELEDATETADAMNR                | 2 | 114326446                              | N-Term(iTRAQ4plex)                                                 | 1709.78032 | 40 | 3.79 | Expt1 |
| VTDSSVSVQLRE                  | 3 | 124487435                              | N-Term(iTRAQ4plex)                                                 | 1463.78215 | 40 | 3.77 | Expt1 |
| LEDGTEFDSSLPQNQPFFVSLGTGQVIK  | 1 | 6679805                                | N-Term(iTRAQ4plex), K28(iTRAQ4plex)                                | 3341.70920 | 40 |      | Expt1 |
| DSSVQEATSTSDILK               | 2 | 194440682;194440687                    | N-Term(iTRAQ4plex), K15(iTRAQ4plex)                                | 1868.96811 | 40 | 4.03 | Expt1 |
| ELAQQVQQVADDYGK               | 2 | 40068493;93587673;40068491             | N-Term(iTRAQ4plex), K15(iTRAQ4plex)                                | 1980.03330 | 40 | 3.45 | Expt1 |
| FQTDGTYTLIR                   | 1 | 19705424                               | N-Term(iTRAQ4plex)                                                 | 1571.85759 | 40 |      | Expt1 |
| TAPTSTIAPGVVMASSPALTPQPAEEAAR | 2 | 82546874;19745144;158966707            | N-Term(iTRAQ4plex)                                                 | 2965.54868 | 40 | 3.16 | Expt1 |
| SLTSLDTALAEIR                 | 2 | 85838509                               | N-Term(iTRAQ4plex)                                                 | 1533.86333 | 40 | 2.82 | Expt1 |
| TSSISGPLSPAYTGQVPYNYNQLEGR    | 2 | 117938334                              | N-Term(iTRAQ4plex)                                                 | 2943.45499 | 40 | 3.38 | Expt1 |
| TSPNEGLSGNPADLER              | 1 | 62234487                               | N-Term(iTRAQ4plex)                                                 | 1800.88371 | 40 |      | Expt1 |
| VCDIILPR                      | 1 | 227497256                              | N-Term(iTRAQ4plex), C2(Methylthio)                                 | 1118.61809 | 40 |      | Expt1 |
| DINQEVYNFLATAGAK              | 1 | 18079339                               | N-Term(iTRAQ4plex), K16(iTRAQ4plex)                                | 2042.08884 | 40 |      | Expt1 |
| DYQALMNVK                     | 2 | 133778953                              | N-Term(iTRAQ4plex), K9(iTRAQ4plex)                                 | 1369.74346 | 40 | 3.25 | Expt1 |
| VVLPTFILER                    | 3 | 198278437;198278441;198278439          | N-Term(iTRAQ4plex)                                                 | 1330.82463 | 40 | 3.02 | Expt1 |
| NSGMPPGAAAIAVLPVLTDPMNR       | 2 | 21312520                               | N-Term(iTRAQ4plex)                                                 | 2537.34299 | 40 |      | Expt1 |
| LQAELEVAQK                    | 2 | 111185907                              | N-Term(iTRAQ4plex), K11(iTRAQ4plex)                                | 1487.87711 | 40 | 4.05 | Expt1 |
| ETVEEQASTTER                  | 3 | 158635985                              | N-Term(iTRAQ4plex)                                                 | 1523.73113 | 40 | 3.47 | Expt1 |
| EFSSQLAGQVNVEMDAAPGVDLTR      | 1 | 226823220                              | N-Term(iTRAQ4plex)                                                 | 2678.33036 | 40 |      | Expt1 |
| ASYVAPLTAQPATYR               | 2 | 86262142                               | N-Term(iTRAQ4plex)                                                 | 1752.93901 | 40 | 2.85 | Expt1 |
| FPPFFTLQPNVDTR                | 1 | 25092662                               | N-Term(iTRAQ4plex)                                                 | 1822.96488 | 40 |      | Expt1 |
| VLEGLQYFQAVTSYGK              | 2 | 94394792;171543883                     | N-Term(iTRAQ4plex), K16(iTRAQ4plex)                                | 2060.13901 | 40 | 3.18 | Expt1 |
| GAPEPETQDAR                   | 1 | 30578432                               | N-Term(iTRAQ4plex)                                                 | 1314.64470 | 40 |      | Expt1 |
| DICTSSPSVTLISVR               | 3 | 110625833                              | N-Term(iTRAQ4plex), C3(Methylthio)                                 | 1654.82720 | 40 | 3.49 | Expt1 |
| GDNIYEWR                      | 1 | 149249464;6678479;21450233             | N-Term(iTRAQ4plex)                                                 | 1196.58269 | 40 |      | Expt1 |
| YPPSPAK                       | 1 | 163310769                              | N-Term(iTRAQ4plex), K7(iTRAQ4plex)                                 | 1047.61748 | 40 |      | Expt1 |
| LTCTYSGFSSPR                  | 2 | 27734847                               | N-Term(iTRAQ4plex), C3(Methylthio)                                 | 1508.69841 | 40 | 3.03 | Expt1 |
| STMVGTPLYWMAPEVVTR            | 2 | 117606272;112181194;46559406           | N-Term(iTRAQ4plex)                                                 | 2069.03105 | 40 | 3.25 | Expt1 |
| GFIFLASLR                     | 1 | 149249577;47059073                     | N-Term(iTRAQ4plex)                                                 | 1167.70207 | 40 |      | Expt1 |
| AADAVEDLR                     | 1 | 7106381                                | N-Term(iTRAQ4plex)                                                 | 1103.58232 | 40 |      | Expt1 |
| GPLTFTR                       | 1 | 29336026                               | N-Term(iTRAQ4plex)                                                 | 1036.59197 | 40 |      | Expt1 |
| ETCTWFTDNYEQAR                | 1 | 13654268                               | N-Term(iTRAQ4plex), C3(Methylthio)                                 | 1953.81999 | 40 |      | Expt1 |
| MDPVDGTQLLK                   | 2 | 62945392                               | N-Term(iTRAQ4plex), M1(Oxidation), Q8(Deamidated), K11(iTRAQ4plex) | 1521.80766 | 40 |      | Expt1 |
| LDPGSEETQTLVR                 | 1 | 110625979                              | N-Term(iTRAQ4plex)                                                 | 1588.83183 | 40 |      | Expt1 |
| QFASQANMVGWPWIQTK             | 4 | 11230802                               | N-Term(iTRAQ4plex), M8(Oxidation), K16(iTRAQ4plex)                 | 2110.10263 | 40 | 4.43 | Expt1 |
| QDEVLQAR                      | 2 | 29336026                               | N-Term(iTRAQ4plex)                                                 | 1102.59905 | 40 | 2.89 | Expt1 |
| SGVISDNELQQALSNGTWTFPNPVTVR   | 2 | 6755000                                | N-Term(iTRAQ4plex), N15(Deamidated)                                | 3075.55295 | 40 | 3.93 | Expt1 |
| MDVLAQEVALLK                  | 2 | 171184425                              | N-Term(iTRAQ4plex), M1(Oxidation), K12(iTRAQ4plex)                 | 1633.95206 | 40 | 3.46 | Expt1 |
| GSVLFSLR                      | 1 | 158937304                              | N-Term(iTRAQ4plex)                                                 | 1022.61138 | 40 |      | Expt1 |

|                         |   |                                                                                                                                                                                                                                                                                                                                                                                                                                             |                                                                     |            |    |  |      |       |
|-------------------------|---|---------------------------------------------------------------------------------------------------------------------------------------------------------------------------------------------------------------------------------------------------------------------------------------------------------------------------------------------------------------------------------------------------------------------------------------------|---------------------------------------------------------------------|------------|----|--|------|-------|
| VIPELNGK                | 1 | 149248895;149249272;149250207;149251040;149251044;149251140;149251223;149251463;149251509;149251903;149251905;149251911;149251964;149251966;149252413;149253819;149253823;149258744;149258770;149258772;149258934;149258938;149259607;149259652;149259964;149260709;149260711;149263021;149265154;149265502;149265922;149266302;149266427;149266431;82996390;149270469;149270673;149272161;94408118;149273204;149274387;149275059;149271270 | N-Term(iTRAQ4plex), N6(Deamidated), K8(iTRAQ4plex)                  | 1158.70757 | 39 |  |      | Expt1 |
| ALDQYLMEFNACR           | 1 | 22122667                                                                                                                                                                                                                                                                                                                                                                                                                                    | N-Term(iTRAQ4plex), C12(Methylthio)                                 | 1763.81059 | 39 |  |      | Expt1 |
| TGASVVAIR               | 2 | 171543869;171543871                                                                                                                                                                                                                                                                                                                                                                                                                         | N-Term(iTRAQ4plex)                                                  | 1017.61882 | 39 |  | 2.87 | Expt1 |
| GDDGPPGMTGFPGAAGR       | 2 | 111120329                                                                                                                                                                                                                                                                                                                                                                                                                                   | N-Term(iTRAQ4plex)                                                  | 1645.77056 | 39 |  |      | Expt1 |
| ILYMMDEINNPVLTVK        | 3 | 34538601;167716840                                                                                                                                                                                                                                                                                                                                                                                                                          | N-Term(iTRAQ4plex), K16(iTRAQ4plex)                                 | 2181.20084 | 39 |  | 3.74 | Expt1 |
| YSLVIIPK                | 2 | 21312594                                                                                                                                                                                                                                                                                                                                                                                                                                    | N-Term(iTRAQ4plex), K8(iTRAQ4plex)                                  | 1220.78215 | 39 |  | 2.96 | Expt1 |
| IAFIMDESNVLDSEGLER      | 1 | 134288917                                                                                                                                                                                                                                                                                                                                                                                                                                   | N-Term(iTRAQ4plex)                                                  | 2200.11260 | 39 |  |      | Expt1 |
| YISPGTEAISGR            | 2 | 226423935                                                                                                                                                                                                                                                                                                                                                                                                                                   | N-Term(iTRAQ4plex)                                                  | 1394.73918 | 39 |  | 2.92 | Expt1 |
| FEAPLFNAR               | 1 | 229892318                                                                                                                                                                                                                                                                                                                                                                                                                                   | N-Term(iTRAQ4plex)                                                  | 1208.65532 | 39 |  |      | Expt1 |
| VAASCGAIQYIPTELDQVR     | 3 | 21703762                                                                                                                                                                                                                                                                                                                                                                                                                                    | N-Term(iTRAQ4plex), C5(Methylthio)                                  | 2224.12296 | 39 |  | 3.40 | Expt1 |
| LGQSPVLGEQGNR           | 3 | 113865981                                                                                                                                                                                                                                                                                                                                                                                                                                   | N-Term(iTRAQ4plex)                                                  | 1498.81084 | 39 |  | 3.39 | Expt1 |
| YAEILLVSGQVNVNPEYEEIISK | 2 | 85861164                                                                                                                                                                                                                                                                                                                                                                                                                                    | N-Term(iTRAQ4plex), K22(iTRAQ4plex)                                 | 2812.45548 | 39 |  | 3.01 | Expt1 |
| DFLLQQTMLR              | 3 | 165932331                                                                                                                                                                                                                                                                                                                                                                                                                                   | N-Term(iTRAQ4plex), M8(Oxidation)                                   | 1424.77544 | 39 |  |      | Expt1 |
| TPVQSQQPSATTPSGADEK     | 2 | 19882201                                                                                                                                                                                                                                                                                                                                                                                                                                    | N-Term(iTRAQ4plex), K19(iTRAQ4plex)                                 | 2217.12705 | 39 |  | 4.44 | Expt1 |
| LVFDEYLK                | 2 | 31981302;158966670                                                                                                                                                                                                                                                                                                                                                                                                                          | N-Term(iTRAQ4plex), K8(iTRAQ4plex)                                  | 1314.75188 | 39 |  | 3.07 | Expt1 |
| NIQETCMSQTGWNR          | 1 | 6996917                                                                                                                                                                                                                                                                                                                                                                                                                                     | N-Term(iTRAQ4plex), C6(Methylthio)                                  | 1857.81534 | 39 |  |      | Expt1 |
| TIVCQESLPELLELYGR       | 2 | 149255522;19526936                                                                                                                                                                                                                                                                                                                                                                                                                          | N-Term(iTRAQ4plex), C4(Methylthio)                                  | 2155.04961 | 39 |  | 2.90 | Expt1 |
| DIAAYR                  | 1 | 149261847;82952271;149266674;83014391;6680229;149255357;149256155;149256821;149258387;149259678;51829731;83022023;149275099;162329617                                                                                                                                                                                                                                                                                                       | N-Term(iTRAQ4plex)                                                  | 852.47215  | 39 |  |      | Expt1 |
| MLAEDELRL               | 1 | 6680718;6680716;6671571                                                                                                                                                                                                                                                                                                                                                                                                                     | N-Term(iTRAQ4plex), M1(Oxidation)                                   | 1136.57414 | 39 |  |      | Expt1 |
| GTLEPVEK                | 2 | 124339838;50345978;124339829;124339826                                                                                                                                                                                                                                                                                                                                                                                                      | N-Term(iTRAQ4plex), K8(iTRAQ4plex)                                  | 1160.66911 | 39 |  |      | Expt1 |
| HRVPALEGAQLK            | 1 | 229576965                                                                                                                                                                                                                                                                                                                                                                                                                                   | N-Term(iTRAQ4plex), Q10(Deamidated), K12(iTRAQ4plex)                | 1607.93315 | 39 |  |      | Expt1 |
| IGADGTQVAMVQFTDDPR      | 1 | 226423922                                                                                                                                                                                                                                                                                                                                                                                                                                   | N-Term(iTRAQ4plex), M10(Oxidation)                                  | 2081.00762 | 39 |  |      | Expt1 |
| SFYPEEVSSMVLTK          | 1 | 31981690                                                                                                                                                                                                                                                                                                                                                                                                                                    | N-Term(iTRAQ4plex), M10(Oxidation), K14(iTRAQ4plex)                 | 1920.99468 | 39 |  |      | Expt1 |
| TEGISTSDIIR             | 2 | 46877071;29164513;6753552                                                                                                                                                                                                                                                                                                                                                                                                                   | N-Term(iTRAQ4plex)                                                  | 1436.77214 | 39 |  | 3.51 | Expt1 |
| LGASNLPAIGISLPASAK      | 2 | 238637279;238637277                                                                                                                                                                                                                                                                                                                                                                                                                         | N-Term(iTRAQ4plex), K17(iTRAQ4plex)                                 | 1855.10007 | 39 |  | 2.85 | Expt1 |
| DSLSDDEVVR              | 3 | 125656150                                                                                                                                                                                                                                                                                                                                                                                                                                   | N-Term(iTRAQ4plex)                                                  | 1163.60222 | 39 |  | 2.95 | Expt1 |
| GLVGIEFK                | 2 | 82950147;82950149;149264086                                                                                                                                                                                                                                                                                                                                                                                                                 | N-Term(iTRAQ4plex), K8(iTRAQ4plex)                                  | 1150.71819 | 39 |  | 2.86 | Expt1 |
| VTILELFR                | 1 | 165377226                                                                                                                                                                                                                                                                                                                                                                                                                                   | N-Term(iTRAQ4plex)                                                  | 1134.70098 | 39 |  |      | Expt1 |
| SLLLSVNAR               | 1 | 6679891                                                                                                                                                                                                                                                                                                                                                                                                                                     | N-Term(iTRAQ4plex)                                                  | 1116.68877 | 39 |  |      | Expt1 |
| ELIQTSALNFLTPLR         | 1 | 9507097                                                                                                                                                                                                                                                                                                                                                                                                                                     | N-Term(iTRAQ4plex)                                                  | 1860.07541 | 39 |  |      | Expt1 |
| EYQTQLIQR               | 3 | 134288917                                                                                                                                                                                                                                                                                                                                                                                                                                   | N-Term(iTRAQ4plex)                                                  | 1322.72197 | 39 |  | 3.06 | Expt1 |
| EDPSGWWTGR              | 1 | 68299824                                                                                                                                                                                                                                                                                                                                                                                                                                    | N-Term(iTRAQ4plex)                                                  | 1334.62712 | 39 |  |      | Expt1 |
| SCIENIFR                | 1 | 12963757                                                                                                                                                                                                                                                                                                                                                                                                                                    | N-Term(iTRAQ4plex), C2(Methylthio)                                  | 1171.57317 | 39 |  |      | Expt1 |
| ICSEDIECSGLTIPK         | 1 | 9790161                                                                                                                                                                                                                                                                                                                                                                                                                                     | N-Term(iTRAQ4plex), C2(Methylthio), C8(Methylthio), K15(iTRAQ4plex) | 1987.94573 | 39 |  |      | Expt1 |

|                           |   |                                                                                    |                                                                     |            |    |      |       |
|---------------------------|---|------------------------------------------------------------------------------------|---------------------------------------------------------------------|------------|----|------|-------|
| ALEYLQEEVEER              | 2 | 8394239                                                                            | N-Term(iTRAQ4plex)                                                  | 1650.84795 | 39 | 3.90 | Expt1 |
| AFNTISAWALQSGTLASR        | 2 | 31981509                                                                           | N-Term(iTRAQ4plex)                                                  | 2153.11301 | 39 | 3.11 | Expt1 |
| GLQTPLWIGLASEEGSR         | 2 | 113930720                                                                          | N-Term(iTRAQ4plex)                                                  | 1958.05071 | 39 | 2.90 | Expt1 |
| VIFFLPWEEK                | 1 | 224922803                                                                          | N-Term(iTRAQ4plex), K9(iTRAQ4plex)                                  | 1466.87151 | 39 |      | Expt1 |
| VALDMTTLTIMR              | 1 | 27754103                                                                           | N-Term(iTRAQ4plex), M11(Oxidation)                                  | 1524.82550 | 39 |      | Expt1 |
| IAVVGEGR                  | 2 | 6755995                                                                            | N-Term(iTRAQ4plex)                                                  | 944.56651  | 39 |      | Expt1 |
| DGILCELINK                | 2 | 21312564                                                                           | N-Term(iTRAQ4plex), C6(Methylthio), K11(iTRAQ4plex)                 | 1564.86820 | 39 | 2.90 | Expt1 |
| FILSCADDK                 | 1 | 149262197;7305363                                                                  | N-Term(iTRAQ4plex), C5(Methylthio), K9(iTRAQ4plex)                  | 1345.67534 | 39 |      | Expt1 |
| CGVISPR                   | 4 | 24762230;149250304;149252400;149252492;94372414;149254145;149261725                | N-Term(iTRAQ4plex), C1(Methylthio)                                  | 921.47521  | 39 |      | Expt1 |
| WTGMIIGPPR                | 2 | 42741690;31543918;226823223;149251440                                              | N-Term(iTRAQ4plex)                                                  | 1271.70647 | 39 | 3.26 | Expt1 |
| TNIIPVIEDAR               | 8 | 149251501;149251503;51921297                                                       | N-Term(iTRAQ4plex)                                                  | 1384.79119 | 39 | 2.87 | Expt1 |
| LAAAFVSR                  | 1 | 149249598;82886628;21704100                                                        | N-Term(iTRAQ4plex)                                                  | 1049.62407 | 39 |      | Expt1 |
| WTNQLNSLNQAVVSK           | 1 | 70909327                                                                           | N-Term(iTRAQ4plex), K15(iTRAQ4plex)                                 | 1990.09916 | 39 |      | Expt1 |
| LSSGYDFSVR                | 2 | 34996495                                                                           | N-Term(iTRAQ4plex)                                                  | 1437.71391 | 39 | 2.88 | Expt1 |
| VLAINLGR                  | 2 | 56744242                                                                           | N-Term(iTRAQ4plex)                                                  | 1112.72954 | 39 | 2.82 | Expt1 |
| TLQIFNIEMK                | 1 | 51491845                                                                           | N-Term(iTRAQ4plex), M9(Oxidation), K10(iTRAQ4plex)                  | 1540.87590 | 39 |      | Expt1 |
| MSPLSIVTLVLDK             | 1 | 31980998                                                                           | N-Term(iTRAQ4plex), K13(iTRAQ4plex)                                 | 1690.01383 | 39 |      | Expt1 |
| GSTAPVGGGSFPTIPR          | 3 | 58037267                                                                           | N-Term(iTRAQ4plex)                                                  | 1745.93340 | 39 | 3.24 | Expt1 |
| VMPNAIVQSVGVSGGR          | 1 | 6755004                                                                            | N-Term(iTRAQ4plex)                                                  | 1714.94219 | 39 |      | Expt1 |
| GLGSPPEPGTTAPYLGR         | 1 | 21450253                                                                           | N-Term(iTRAQ4plex)                                                  | 1716.90618 | 39 |      | Expt1 |
| SGVPVLAVSLALEGK           | 2 | 110625656;270309161                                                                | N-Term(iTRAQ4plex), K15(iTRAQ4plex)                                 | 1728.05545 | 39 | 3.70 | Expt1 |
| AGAYDFPSPEWDTVTPEAK       | 2 | 85362742;70906477;18158420;85362729;28916677;149265235;70906479;75991700;226693349 | N-Term(iTRAQ4plex), K19(iTRAQ4plex)                                 | 2369.15586 | 39 | 3.37 | Expt1 |
| ALTDELAALGR               | 1 | 16716597                                                                           | N-Term(iTRAQ4plex)                                                  | 1273.72893 | 39 |      | Expt1 |
| SYAVVGVPPDVMGIPAYIPAALQK  | 3 | 18700004;22122797                                                                  | N-Term(iTRAQ4plex), K26(iTRAQ4plex)                                 | 2872.59610 | 39 | 3.86 | Expt1 |
| VPSGLYLGTCER              | 1 | 183979966                                                                          | N-Term(iTRAQ4plex), C10(Methylthio)                                 | 1484.73589 | 39 |      | Expt1 |
| DLVAIEAK                  | 1 | 117938332;117938334                                                                | N-Term(iTRAQ4plex), K8(iTRAQ4plex)                                  | 1146.68669 | 39 |      | Expt1 |
| GPPPAPEGGSR               | 1 | 33147082                                                                           | N-Term(iTRAQ4plex)                                                  | 1165.61296 | 39 |      | Expt1 |
| TSYQPSSPSR                | 2 | 160333881                                                                          | N-Term(iTRAQ4plex)                                                  | 1253.62493 | 39 | 3.39 | Expt1 |
| FNAILCSR                  | 2 | 149265356;149265358;160707921                                                      | N-Term(iTRAQ4plex), C6(Methylthio)                                  | 1113.56865 | 39 |      | Expt1 |
| ELDLPEELVSR               | 2 | 85861218                                                                           | N-Term(iTRAQ4plex)                                                  | 1443.78411 | 39 | 2.93 | Expt1 |
| AVAALLTIPEAEK             | 1 | 189409138                                                                          | N-Term(iTRAQ4plex), K13(iTRAQ4plex)                                 | 1613.98020 | 39 |      | Expt1 |
| TELSQSDMFDQR              | 2 | 124286826                                                                          | N-Term(iTRAQ4plex)                                                  | 1600.74211 | 39 | 3.73 | Expt1 |
| DDANNDPQWSEEQLIAAK        | 2 | 13385434                                                                           | N-Term(iTRAQ4plex), K18(iTRAQ4plex)                                 | 2332.12717 | 39 | 4.03 | Expt1 |
| ICILEPETGNDMSPYEAYK       | 1 | 111185907                                                                          | N-Term(iTRAQ4plex), C2(Methylthio), M12(Oxidation), K19(iTRAQ4plex) | 2523.18125 | 39 |      | Expt1 |
| IYELAAGGTAVGTGLNTR        | 2 | 226823367                                                                          | N-Term(iTRAQ4plex)                                                  | 1908.03472 | 39 | 3.59 | Expt1 |
| EGLQNMEAR                 | 1 | 14389431                                                                           | N-Term(iTRAQ4plex)                                                  | 1191.59184 | 39 |      | Expt1 |
| NILTEIYR                  | 1 | 6679583                                                                            | N-Term(iTRAQ4plex)                                                  | 1165.67082 | 39 |      | Expt1 |
| FPEVEDVVMVNVNR            | 1 | 13385624                                                                           | N-Term(iTRAQ4plex)                                                  | 1676.88553 | 39 |      | Expt1 |
| DLDLLLVEAK                | 2 | 25141235;6753620;14861844                                                          | N-Term(iTRAQ4plex), K10(iTRAQ4plex)                                 | 1416.86296 | 39 |      | Expt1 |
| SLNILTAFR                 | 2 | 19526463                                                                           | N-Term(iTRAQ4plex)                                                  | 1178.70488 | 39 | 2.92 | Expt1 |
| QAVQILQQVTVR              | 2 | 31560792                                                                           | N-Term(iTRAQ4plex)                                                  | 1526.91496 | 39 | 3.03 | Expt1 |
| TVIDYNGER                 | 4 | 42415475                                                                           | N-Term(iTRAQ4plex)                                                  | 1210.61833 | 39 | 2.95 | Expt1 |
| TLSFFNK                   | 2 | 111074529                                                                          | N-Term(iTRAQ4plex), K7(iTRAQ4plex)                                  | 1144.65715 | 39 | 2.82 | Expt1 |
| VMQDFDILR                 | 1 | 126518317                                                                          | N-Term(iTRAQ4plex)                                                  | 1427.75163 | 39 |      | Expt1 |
| GAETTLALPMASDLELYDVTENSMR | 1 | 226423922                                                                          | N-Term(iTRAQ4plex), M10(Oxidation)                                  | 2887.39048 | 39 |      | Expt1 |
| YVEVGR                    | 2 | 149257159;13385472                                                                 | N-Term(iTRAQ4plex)                                                  | 866.48381  | 39 |      | Expt1 |
| VELSTGMPR                 | 1 | 22122585                                                                           | N-Term(iTRAQ4plex)                                                  | 1133.61113 | 39 |      | Expt1 |
| SITLFVQEDR                | 1 | 149249577;47059073                                                                 | N-Term(iTRAQ4plex)                                                  | 1351.73747 | 39 |      | Expt1 |

|                             |   |                                                                                                                                                      |                                                                      |            |    |      |       |
|-----------------------------|---|------------------------------------------------------------------------------------------------------------------------------------------------------|----------------------------------------------------------------------|------------|----|------|-------|
| QGVEDAFYTLVR                | 2 | 194440734;149251704;111154109                                                                                                                        | N-Term(iTRAQ4plex)                                                   | 1541.81267 | 39 | 3.39 | Expt1 |
| LDSELR                      | 1 | 47059013;20911031;54607171;113195684;9910294;47523977                                                                                                | N-Term(iTRAQ4plex)                                                   | 876.49292  | 39 |      | Expt1 |
| LPAVVATDLR                  | 1 | 149257125;149257127;38142460                                                                                                                         | N-Term(iTRAQ4plex)                                                   | 1198.72905 | 39 |      | Expt1 |
| EIAQDFK                     | 2 | 30061345;30061339;149246529;82886797;149255259;149255706;38091641;94395563;82952425;82952638;124486606;30061401;94378038;149258917;82934691;83019187 | N-Term(iTRAQ4plex), K7(iTRAQ4plex)                                   | 1138.62554 | 39 | 2.84 | Expt1 |
| AEISFEDR                    | 1 | 125347376                                                                                                                                            | N-Term(iTRAQ4plex)                                                   | 1110.55754 | 39 |      | Expt1 |
| CIVVEEGK                    | 2 | 9790219                                                                                                                                              | N-Term(iTRAQ4plex), C1(Methylthio), K8(iTRAQ4plex)                   | 1210.63823 | 39 | 3.25 | Expt1 |
| ALYDFEPENEGELGFK            | 2 | 31560792                                                                                                                                             | N-Term(iTRAQ4plex), K16(iTRAQ4plex)                                  | 2146.06070 | 39 | 2.91 | Expt1 |
| EPIMPAPGQEETVR              | 1 | 225543157;225543168                                                                                                                                  | N-Term(iTRAQ4plex)                                                   | 1697.86662 | 39 |      | Expt1 |
| TLINILTR                    | 3 | 149254235;160707925                                                                                                                                  | N-Term(iTRAQ4plex)                                                   | 1216.74199 | 38 | 2.98 | Expt1 |
| YSSVSV                      | 1 | 6755204                                                                                                                                              | N-Term(iTRAQ4plex)                                                   | 882.47119  | 38 |      | Expt1 |
| TVYGGGCSEMLMAHAVTQLANR      | 2 | 126521835                                                                                                                                            | N-Term(iTRAQ4plex), C7(Methylthio)                                   | 2499.18180 | 38 | 4.54 | Expt1 |
| ADIFMFDEPSSYLDVK            | 2 | 114205431                                                                                                                                            | N-Term(iTRAQ4plex), K16(iTRAQ4plex)                                  | 2165.08225 | 38 | 3.40 | Expt1 |
| NIPMTLELLQSTR               | 2 | 229094709;6755728;229094714                                                                                                                          | N-Term(iTRAQ4plex)                                                   | 1659.92301 | 38 | 3.16 | Expt1 |
| EMPPTNPIR                   | 1 | 134023662                                                                                                                                            | N-Term(iTRAQ4plex), M2(Oxidation)                                    | 1214.63030 | 38 |      | Expt1 |
| VAVQPQAEAGPCETHDLVGPELTSGR  | 2 | 149260328;254911027                                                                                                                                  | N-Term(iTRAQ4plex), C13(Methylthio)                                  | 2980.42197 | 38 | 4.05 | Expt1 |
| LNSNTQVLLSATMPSDVLEVTK      | 2 | 21450625;226823309                                                                                                                                   | N-Term(iTRAQ4plex), K23(iTRAQ4plex)                                  | 2747.52152 | 38 | 3.83 | Expt1 |
| SGSEELVDCSCIGNK             | 3 | 160333881                                                                                                                                            | N-Term(iTRAQ4plex), C8(Methylthio), C11(Methylthio), K15(iTRAQ4plex) | 1920.84006 | 38 | 3.91 | Expt1 |
| MSAEINEIR                   | 4 | 31543942                                                                                                                                             | N-Term(iTRAQ4plex)                                                   | 1319.71636 | 38 | 3.64 | Expt1 |
| NPEGAVFTWEPSTGK             | 1 | 149263766;149263798                                                                                                                                  | N-Term(iTRAQ4plex), K15(iTRAQ4plex)                                  | 1907.98185 | 38 |      | Expt1 |
| ILFAEATR                    | 1 | 156713423                                                                                                                                            | N-Term(iTRAQ4plex)                                                   | 1064.62334 | 38 |      | Expt1 |
| VLDISIPASPEQIQR             | 4 | 31982223                                                                                                                                             | N-Term(iTRAQ4plex)                                                   | 1810.02434 | 38 | 3.00 | Expt1 |
| GQEITVR                     | 1 | 111074529                                                                                                                                            | N-Term(iTRAQ4plex)                                                   | 946.54466  | 38 |      | Expt1 |
| ELGSECIEFDEEK               | 1 | 46195798                                                                                                                                             | N-Term(iTRAQ4plex), C6(Methylthio), K14(iTRAQ4plex)                  | 1918.86856 | 38 |      | Expt1 |
| VFPDPLDTFK                  | 1 | 130503301                                                                                                                                            | N-Term(iTRAQ4plex), K10(iTRAQ4plex)                                  | 1466.82073 | 38 |      | Expt1 |
| GSDCGIVNVNIPITSGAEIGGAFGGEK | 2 | 188219757;188035915                                                                                                                                  | N-Term(iTRAQ4plex), C4(Methylthio), K26(iTRAQ4plex)                  | 2783.36167 | 38 | 3.03 | Expt1 |
| QPGTNGEGEEEAR               | 1 | 85702366                                                                                                                                             | N-Term(iTRAQ4plex), N5(Deamidated)                                   | 1518.68193 | 38 |      | Expt1 |
| EDPFVFIPEDDPLFPIEK          | 2 | 31542461                                                                                                                                             | N-Term(iTRAQ4plex), K19(iTRAQ4plex)                                  | 2532.32169 | 38 | 4.18 | Expt1 |
| TNGFSLSCR                   | 3 | 160333229                                                                                                                                            | N-Term(iTRAQ4plex), N2(Deamidated), C9(Methylthio)                   | 1304.57305 | 38 | 3.41 | Expt1 |
| EYVLPSEFVR                  | 5 | 126518317                                                                                                                                            | N-Term(iTRAQ4plex)                                                   | 1382.74602 | 38 | 3.25 | Expt1 |
| GLLDDL                      | 1 | 62526118                                                                                                                                             | N-Term(iTRAQ4plex)                                                   | 945.55217  | 38 |      | Expt1 |
| LSLEGIVVQR                  | 1 | 39930425                                                                                                                                             | N-Term(iTRAQ4plex)                                                   | 1257.76714 | 38 |      | Expt1 |
| GNASPVLDPSDLILTR            | 1 | 19526970                                                                                                                                             | N-Term(iTRAQ4plex)                                                   | 1812.00493 | 38 |      | Expt1 |
| DQSTWTVGPGGR                | 2 | 156938252                                                                                                                                            | N-Term(iTRAQ4plex)                                                   | 1491.71245 | 38 | 3.71 | Expt1 |
| ECIEAVIR                    | 3 | 33413404                                                                                                                                             | N-Term(iTRAQ4plex), C2(Methylthio)                                   | 1122.57952 | 38 | 3.00 | Expt1 |
| YPDPLIK                     | 1 | 6677805;51708365                                                                                                                                     | N-Term(iTRAQ4plex), K7(iTRAQ4plex)                                   | 1133.67766 | 38 |      | Expt1 |
| MSVEADINGLR                 | 2 | 154090941;7106335;21489935                                                                                                                           | N-Term(iTRAQ4plex), M1(Oxidation), N8(Deamidated)                    | 1365.68376 | 38 | 2.84 | Expt1 |
| LFSLELVDESSEIR              | 1 | 18390321                                                                                                                                             | N-Term(iTRAQ4plex)                                                   | 1750.93950 | 38 |      | Expt1 |
| VAFGEDIDLPEFDAR             | 2 | 6681079                                                                                                                                              | N-Term(iTRAQ4plex)                                                   | 1938.96074 | 38 | 3.40 | Expt1 |
| ITDLYDLR                    | 4 | 117938332;117938334                                                                                                                                  | N-Term(iTRAQ4plex)                                                   | 1253.68950 | 38 | 3.00 | Expt1 |
| IPEGSVAVPATDAAPK            | 1 | 164698481;164698479                                                                                                                                  | N-Term(iTRAQ4plex), K15(iTRAQ4plex)                                  | 1711.94829 | 38 |      | Expt1 |
| SFGPAVVMNR                  | 3 | 149267092;6857757                                                                                                                                    | N-Term(iTRAQ4plex), M8(Oxidation)                                    | 1237.64995 | 38 | 2.92 | Expt1 |
| SDPFLEFFR                   | 2 | 25141330                                                                                                                                             | N-Term(iTRAQ4plex)                                                   | 1301.66753 | 38 | 3.13 | Expt1 |
| SPIAEAVFR                   | 1 | 82932679;159032062                                                                                                                                   | N-Term(iTRAQ4plex)                                                   | 1133.64556 | 38 |      | Expt1 |
| MLQTSVVLVSGLR               | 1 | 6678483                                                                                                                                              | N-Term(iTRAQ4plex), M1(Oxidation)                                    | 1550.87212 | 38 |      | Expt1 |
| VLYSGFFAGLR                 | 2 | 21312544                                                                                                                                             | N-Term(iTRAQ4plex)                                                   | 1259.76335 | 38 | 3.09 | Expt1 |
| TLYGFGG                     | 2 | 149263932;94378251                                                                                                                                   | N-Term(iTRAQ4plex)                                                   | 858.44855  | 38 |      | Expt1 |

|                            |   |                                                       |                                                                      |            |    |      |       |
|----------------------------|---|-------------------------------------------------------|----------------------------------------------------------------------|------------|----|------|-------|
| AITSAYR                    | 4 | 31980840;6679583;31980838                             | N-Term(iTRAQ4plex)                                                   | 1088.58660 | 38 | 2.96 | Expt1 |
| FLEMCDLLAR                 | 1 | 112293266                                             | N-Term(iTRAQ4plex), M4(Oxidation), C5(Methylthio)                    | 1531.70976 | 38 |      | Expt1 |
| GLPVLVELLQSETDK            | 1 | 40254129                                              | N-Term(iTRAQ4plex), K15(iTRAQ4plex)                                  | 1929.12101 | 38 |      | Expt1 |
| SLLLLAYLIR                 | 2 | 154240730                                             | N-Term(iTRAQ4plex)                                                   | 1318.86113 | 38 | 2.87 | Expt1 |
| MQQQLEDEYQELLDIK           | 3 | 9506843;162287370;161760667                           | N-Term(iTRAQ4plex), M1(Oxidation), K15(iTRAQ4plex)                   | 2198.13022 | 38 | 3.81 | Expt1 |
| GNLLQCVCTGNGR              | 2 | 46849812                                              | N-Term(iTRAQ4plex), C6(Methylthio), C8(Methylthio), N11(Deamidated)  | 1571.69609 | 38 | 3.14 | Expt1 |
| TEATLEAQTR                 | 1 | 124486712                                             | N-Term(iTRAQ4plex)                                                   | 1392.71160 | 38 |      | Expt1 |
| LQIDEQLR                   | 1 | 51036613;163954941;163954943;83921589;17998694        | N-Term(iTRAQ4plex)                                                   | 1158.65972 | 38 |      | Expt1 |
| VELVPPTPAEIPAIQSVK         | 4 | 149253631;149262331                                   | N-Term(iTRAQ4plex), K19(iTRAQ4plex)                                  | 2277.33762 | 38 | 3.00 | Expt1 |
| AGQTQPNPILPIQPALTPR        | 1 | 73695877;91992157                                     | N-Term(iTRAQ4plex)                                                   | 2213.25469 | 38 |      | Expt1 |
| GAGPESEYIFQTPPEGVPEQPSFLK  | 2 | 110347545                                             | N-Term(iTRAQ4plex), K25(iTRAQ4plex)                                  | 2992.52579 | 38 | 4.01 | Expt1 |
| GNAPGLPQLMEVVR             | 1 | 189458844;189458842                                   | N-Term(iTRAQ4plex)                                                   | 1753.94097 | 38 |      | Expt1 |
| GGIVGMTLIAR                | 1 | 61888838                                              | N-Term(iTRAQ4plex)                                                   | 1328.78484 | 38 |      | Expt1 |
| GAAAMIPGPQTVATEIR          | 2 | 7305029;54873604                                      | N-Term(iTRAQ4plex), M5(Oxidation)                                    | 1842.99016 | 38 | 3.19 | Expt1 |
| ASVVPLGAGR                 | 1 | 6681255                                               | N-Term(iTRAQ4plex)                                                   | 1070.64299 | 38 |      | Expt1 |
| IFPGDITLETGEVIPPMPR        | 2 | 84781779                                              | N-Term(iTRAQ4plex)                                                   | 2129.15549 | 38 | 3.29 | Expt1 |
| NQSFQCTVNLNDK              | 2 | 82885877;94369475;63572172;94378045;82933068;82995837 | N-Term(iTRAQ4plex), C5(Methylthio), K12(iTRAQ4plex)                  | 1699.84001 | 38 | 3.49 | Expt1 |
| NQSFQCTVNLNK               | 2 | 82885753                                              | N-Term(iTRAQ4plex), C5(Methylthio), N11(Deamidated), K12(iTRAQ4plex) | 1699.84001 | 38 | 3.49 | Expt1 |
| FDTGNLCMVTTGGANLGR         | 2 | 6677805                                               | N-Term(iTRAQ4plex), C7(Methylthio), M8(Oxidation)                    | 1931.89542 | 38 | 4.32 | Expt1 |
| MSPDEGQEELLEVQAEK          | 2 | 111154067                                             | N-Term(iTRAQ4plex), K18(iTRAQ4plex)                                  | 2349.15158 | 38 | 3.35 | Expt1 |
| IGVITNR                    | 1 | 6677805                                               | N-Term(iTRAQ4plex)                                                   | 916.57207  | 38 |      | Expt1 |
| LVLPAQISDAELQEVVK          | 1 | 149261190;149261192;22779899                          | N-Term(iTRAQ4plex), K18(iTRAQ4plex)                                  | 2237.30381 | 38 |      | Expt1 |
| LQSVTTIPTVGFNVETVYK        | 1 | 6680724                                               | N-Term(iTRAQ4plex), K21(iTRAQ4plex)                                  | 2542.40934 | 38 |      | Expt1 |
| DVMICPDTSLEDAK             | 2 | 55741460                                              | N-Term(iTRAQ4plex), M3(Oxidation), C5(Methylthio), K14(iTRAQ4plex)   | 1886.88150 | 38 | 3.09 | Expt1 |
| AILPCQDTPSVK               | 2 | 116734870                                             | N-Term(iTRAQ4plex), C5(Methylthio), K12(iTRAQ4plex)                  | 1605.85832 | 38 | 3.15 | Expt1 |
| LLIEDLEAR                  | 1 | 12963633                                              | N-Term(iTRAQ4plex)                                                   | 1215.70635 | 38 |      | Expt1 |
| GITGIEDK                   | 3 | 6678359                                               | N-Term(iTRAQ4plex), K8(iTRAQ4plex)                                   | 1120.65654 | 38 | 2.85 | Expt1 |
| AGNSLAASTAETAGSAQSR        | 1 | 31982223                                              | N-Term(iTRAQ4plex)                                                   | 2022.98105 | 38 |      | Expt1 |
| EFQYLPVVMGPLMK             | 2 | 29789199                                              | N-Term(iTRAQ4plex), K15(iTRAQ4plex)                                  | 2068.12625 | 38 | 3.53 | Expt1 |
| LTSEPPQR                   | 1 | 18390323                                              | N-Term(iTRAQ4plex)                                                   | 1199.65093 | 38 |      | Expt1 |
| YDLSPITVK                  | 1 | 13385678                                              | N-Term(iTRAQ4plex), K9(iTRAQ4plex)                                   | 1323.78533 | 38 |      | Expt1 |
| SDPLLMGIPTSENPFK           | 1 | 13384618                                              | N-Term(iTRAQ4plex), K16(iTRAQ4plex)                                  | 2034.08891 | 38 |      | Expt1 |
| NSASVGIIQR                 | 1 | 27370046                                              | N-Term(iTRAQ4plex), Q9(Deamidated)                                   | 1189.66313 | 38 |      | Expt1 |
| DGGSGVPPAGPGAASEALAVLTSFGR | 1 | 33859650                                              | N-Term(iTRAQ4plex)                                                   | 2485.28592 | 38 |      | Expt1 |
| LPVLLLGR                   | 1 | 229093139                                             | N-Term(iTRAQ4plex)                                                   | 1024.69988 | 38 |      | Expt1 |
| SCAQNWIYE                  | 2 | 149262292;149274354                                   | N-Term(iTRAQ4plex), C2(Methylthio)                                   | 1303.55791 | 38 |      | Expt1 |
| SVTAFFNWLK                 | 1 | 56699432;56699434                                     | N-Term(iTRAQ4plex)                                                   | 1384.75078 | 38 |      | Expt1 |
| FSVQTMCPIEGEGNIAR          | 1 | 22122695                                              | N-Term(iTRAQ4plex), M6(Oxidation), C7(Methylthio)                    | 2057.96280 | 38 |      | Expt1 |
| YICTTSAIQNR                | 2 | 29293809                                              | N-Term(iTRAQ4plex), C3(Methylthio)                                   | 1459.71514 | 38 | 2.86 | Expt1 |
| DAEATYLAR                  | 4 | 6680606                                               | N-Term(iTRAQ4plex)                                                   | 1153.59917 | 38 | 3.16 | Expt1 |
| ISMPPIDLNLK                | 1 | 61743961                                              | N-Term(iTRAQ4plex), M3(Oxidation), K11(iTRAQ4plex)                   | 1562.87798 | 38 |      | Expt1 |
| ISMDDLNLK                  | 1 | 61743961                                              | N-Term(iTRAQ4plex), M3(Oxidation), N7(Deamidated), K11(iTRAQ4plex)   | 1562.87798 | 38 |      | Expt1 |
| ISMPEVDNLK                 | 1 | 61743961                                              | N-Term(iTRAQ4plex), M3(Oxidation), K11(iTRAQ4plex)                   | 1562.87798 | 38 |      | Expt1 |
| GMGPGTTPAGYGR              | 1 | 149252953;23956214                                    | N-Term(iTRAQ4plex)                                                   | 1264.62920 | 38 |      | Expt1 |
| VDSYGGFLR                  | 2 | 149253040;183979966                                   | N-Term(iTRAQ4plex)                                                   | 1157.60698 | 38 | 3.14 | Expt1 |
| NYPNTFWMNPQYLIK            | 2 | 157951598                                             | N-Term(iTRAQ4plex), K15(iTRAQ4plex)                                  | 2217.13913 | 38 | 3.16 | Expt1 |
| LTALEER                    | 1 | 55926127                                              | N-Term(iTRAQ4plex)                                                   | 975.56304  | 38 |      | Expt1 |
| VLVSPTNPPGATSSCQK          | 1 | 23956096                                              | N-Term(iTRAQ4plex), C15(Methylthio), K17(iTRAQ4plex)                 | 2020.04844 | 38 |      | Expt1 |
| SSLDSIEMAYAR               | 2 | 27369533                                              | N-Term(iTRAQ4plex)                                                   | 1486.72869 | 38 | 3.12 | Expt1 |

|                              |   |                                                                                                 |                                                     |            |    |      |       |
|------------------------------|---|-------------------------------------------------------------------------------------------------|-----------------------------------------------------|------------|----|------|-------|
| GGSLAQPADR                   | 2 | 6677869                                                                                         | N-Term(iTRAQ4plex)                                  | 1115.59404 | 38 | 3.42 | Expt1 |
| GVNTFSPEGR                   | 2 | 7106387;94388526;94388799                                                                       | N-Term(iTRAQ4plex)                                  | 1207.61821 | 38 | 3.71 | Expt1 |
| TLTDLLLR                     | 1 | 6755997                                                                                         | N-Term(iTRAQ4plex)                                  | 1088.68083 | 38 |      | Expt1 |
| EASDIITDDNFTSIVK             | 1 | 54261793;56699478;62234487                                                                      | N-Term(iTRAQ4plex), K17(iTRAQ4plex)                 | 2169.16037 | 38 |      | Expt1 |
| AAEILAR                      | 2 | 21450277;157168326                                                                              | N-Term(iTRAQ4plex)                                  | 887.54686  | 37 |      | Expt1 |
| FMQDASDVMLLLK                | 2 | 29789199;149272031                                                                              | N-Term(iTRAQ4plex), K14(iTRAQ4plex)                 | 1927.03250 | 37 | 3.09 | Expt1 |
| FMQDASNMVQLLLK               | 2 | 53850664                                                                                        | N-Term(iTRAQ4plex), N7(Deamidated), K14(iTRAQ4plex) | 1927.03250 | 37 | 3.09 | Expt1 |
| VVCEDFLQDVSASTK              | 1 | 20806109                                                                                        | N-Term(iTRAQ4plex), C3(Methylthio), K15(iTRAQ4plex) | 1974.98105 | 37 |      | Expt1 |
| IVTETVTR                     | 1 | 226423931                                                                                       | N-Term(iTRAQ4plex)                                  | 1163.67754 | 37 |      | Expt1 |
| ILPDTQPFPFALWEILNK           | 1 | 226423922                                                                                       | N-Term(iTRAQ4plex), K18(iTRAQ4plex)                 | 2412.34348 | 37 |      | Expt1 |
| SQLEGLEESVR                  | 2 | 226958474                                                                                       | N-Term(iTRAQ4plex)                                  | 1390.72978 | 37 | 3.37 | Expt1 |
| TALTYYLDTNPPR                | 1 | 6679421                                                                                         | N-Term(iTRAQ4plex)                                  | 1781.95713 | 37 |      | Expt1 |
| DFPQYFAVSVR                  | 2 | 116256491;116256493;22129789;116256497;116256503;116256505;25121946;86262153;116256499;77681962 | N-Term(iTRAQ4plex)                                  | 1472.76872 | 37 | 3.05 | Expt1 |
| LTAEFEEAQR                   | 3 | 124486712                                                                                       | N-Term(iTRAQ4plex)                                  | 1337.68169 | 37 | 3.53 | Expt1 |
| ETECTYFSTPLLLGK              | 3 | 31982186                                                                                        | N-Term(iTRAQ4plex), C4(Methylthio), K15(iTRAQ4plex) | 2036.03464 | 37 | 3.53 | Expt1 |
| AFDAGLR                      | 1 | 149253498                                                                                       | N-Term(iTRAQ4plex)                                  | 893.49933  | 37 |      | Expt1 |
| AFDQIR                       | 1 | 6678359;148287022;125347421                                                                     | N-Term(iTRAQ4plex)                                  | 893.49933  | 37 |      | Expt1 |
| AMALSFDQR                    | 1 | 117956399                                                                                       | N-Term(iTRAQ4plex)                                  | 1182.60393 | 37 |      | Expt1 |
| YLNQDYETLR                   | 4 | 157951598                                                                                       | N-Term(iTRAQ4plex)                                  | 1458.73601 | 37 | 3.71 | Expt1 |
| AWEVDTCR                     | 1 | 226823359                                                                                       | N-Term(iTRAQ4plex), C7(Methylthio)                  | 1169.52165 | 37 |      | Expt1 |
| FEGIVEDYNYGTLRL              | 1 | 13385810                                                                                        | N-Term(iTRAQ4plex)                                  | 1932.98417 | 37 |      | Expt1 |
| EVGIPPEQSLETAK               | 1 | 52345394;23956222                                                                               | N-Term(iTRAQ4plex), K14(iTRAQ4plex)                 | 1785.99004 | 37 |      | Expt1 |
| NLAVDAR                      | 1 | 146219835;146219830;146219849;146231979                                                         | N-Term(iTRAQ4plex)                                  | 902.51592  | 37 |      | Expt1 |
| ELPTGGQEGEQLQLQK             | 2 | 21362303                                                                                        | N-Term(iTRAQ4plex), K16(iTRAQ4plex)                 | 2043.09482 | 37 | 3.69 | Expt1 |
| AIQLEYSEAR                   | 2 | 19705424                                                                                        | N-Term(iTRAQ4plex)                                  | 1323.70305 | 37 | 2.92 | Expt1 |
| NGFLLDGFPFR                  | 3 | 149253038;34328230;77020262                                                                     | N-Term(iTRAQ4plex), N1(Deamidated)                  | 1280.67742 | 37 | 3.15 | Expt1 |
| AIYQATYR                     | 1 | 6755204                                                                                         | N-Term(iTRAQ4plex)                                  | 1129.61064 | 37 |      | Expt1 |
| LFEAEEQDLFK                  | 1 | 7106303                                                                                         | N-Term(iTRAQ4plex), K11(iTRAQ4plex)                 | 1656.87632 | 37 |      | Expt1 |
| QSQIQVFEDGADTTSPETPDSSASK    | 1 | 118601017                                                                                       | N-Term(iTRAQ4plex), K25(iTRAQ4plex)                 | 2913.39237 | 37 |      | Expt1 |
| AAFQLGSPWR                   | 5 | 6753036                                                                                         | N-Term(iTRAQ4plex)                                  | 1276.69707 | 37 | 3.75 | Expt1 |
| SQIVVEEGSEPELMLK             | 2 | 226246550;226246552                                                                             | N-Term(iTRAQ4plex), M16(Oxidation), K17(iTRAQ4plex) | 2179.14237 | 37 | 3.71 | Expt1 |
| DNLAQGSFNMEQANYTIQSLK        | 1 | 13386442                                                                                        | N-Term(iTRAQ4plex), K21(iTRAQ4plex)                 | 2731.37253 | 37 |      | Expt1 |
| CYPNPGSELPLK                 | 2 | 31982260                                                                                        | N-Term(iTRAQ4plex), C1(Methylthio), K12(iTRAQ4plex) | 1651.84355 | 37 | 3.68 | Expt1 |
| NLSGQPNFPCR                  | 2 | 19111162                                                                                        | N-Term(iTRAQ4plex), C10(Methylthio)                 | 1422.67620 | 37 | 3.19 | Expt1 |
| DCPVPLPGDGDLLVR              | 1 | 31559926                                                                                        | N-Term(iTRAQ4plex), C2(Methylthio)                  | 1755.90178 | 37 |      | Expt1 |
| MFAEYLAENQR                  | 2 | 10946972                                                                                        | N-Term(iTRAQ4plex)                                  | 1602.77251 | 37 | 3.84 | Expt1 |
| LVMEEAPEESYK                 | 2 | 21703842                                                                                        | N-Term(iTRAQ4plex), K11(iTRAQ4plex)                 | 1583.82035 | 37 | 2.90 | Expt1 |
| EEVPEEAFPGAAPLLTQVPTVEAPEMMR | 1 | 23943828                                                                                        | N-Term(iTRAQ4plex)                                  | 3253.63291 | 37 |      | Expt1 |
| EMQDLGGGER                   | 4 | 169234958;32129201;32129205                                                                     | N-Term(iTRAQ4plex)                                  | 1235.58281 | 37 | 3.79 | Expt1 |
| VSFPGLR                      | 1 | 37537522                                                                                        | N-Term(iTRAQ4plex)                                  | 919.54772  | 37 |      | Expt1 |
| DFLLTAR                      | 3 | 82895306;94372654;94377377                                                                      | N-Term(iTRAQ4plex)                                  | 979.57042  | 37 |      | Expt1 |
| LTAALVLR                     | 1 | 22507357                                                                                        | N-Term(iTRAQ4plex)                                  | 1000.66649 | 37 |      | Expt1 |
| ESSEESGEFDLVSALR             | 1 | 78191779                                                                                        | N-Term(iTRAQ4plex)                                  | 2013.94206 | 37 |      | Expt1 |
| FLENYDAIR                    | 2 | 139948802                                                                                       | N-Term(iTRAQ4plex)                                  | 1284.67351 | 37 | 3.03 | Expt1 |
| IPDWFLNR                     | 2 | 6755368;149252587;38085727;149259085;149263957;149264584;149264635;82959202;83001915            | N-Term(iTRAQ4plex)                                  | 1204.66265 | 37 |      | Expt1 |
| TPAPSPQTSPLNPITYLTK          | 4 | 58037109                                                                                        | N-Term(iTRAQ4plex), K19(iTRAQ4plex)                 | 2314.29398 | 37 | 3.25 | Expt1 |

|                           |   |                                                                                                                               |                                                    |            |    |      |       |
|---------------------------|---|-------------------------------------------------------------------------------------------------------------------------------|----------------------------------------------------|------------|----|------|-------|
| VLTLDTMNPICVR             | 2 | 33413404                                                                                                                      | N-Term(iTRAQ4plex), C10(Methylthio)                | 1551.78594 | 37 | 2.91 | Expt1 |
| NPSSAVPPPAGSVK            | 2 | 157311641                                                                                                                     | N-Term(iTRAQ4plex), K14(iTRAQ4plex)                | 1595.90154 | 37 | 3.45 | Expt1 |
| GETLGLIGFGR               | 2 | 6753548;282721029                                                                                                             | N-Term(iTRAQ4plex)                                 | 1263.71636 | 37 | 3.14 | Expt1 |
| SILPTAPR                  | 1 | 167234372                                                                                                                     | N-Term(iTRAQ4plex)                                 | 998.61095  | 37 |      | Expt1 |
| TTIGVEFSTR                | 1 | 31980838                                                                                                                      | N-Term(iTRAQ4plex)                                 | 1254.68230 | 37 |      | Expt1 |
| FQNAALLTLPNQVPR           | 2 | 6754164                                                                                                                       | N-Term(iTRAQ4plex)                                 | 1954.09989 | 37 | 3.68 | Expt1 |
| VGVSQPEDSQDLPGER          | 2 | 226958474                                                                                                                     | N-Term(iTRAQ4plex)                                 | 2113.02591 | 37 | 3.09 | Expt1 |
| SNPELPEALVFQDSVTFR        | 2 | 156938252                                                                                                                     | N-Term(iTRAQ4plex)                                 | 2193.14188 | 37 | 3.81 | Expt1 |
| FLYDDNQR                  | 2 | 34328148;153945749                                                                                                            | N-Term(iTRAQ4plex)                                 | 1214.59392 | 37 | 2.85 | Expt1 |
| WVDLTMDDIR                | 5 | 6679337                                                                                                                       | N-Term(iTRAQ4plex)                                 | 1407.70622 | 37 | 3.25 | Expt1 |
| ATAQEAQSLGGR              | 1 | 31980844                                                                                                                      | N-Term(iTRAQ4plex)                                 | 1332.70122 | 37 |      | Expt1 |
| DIVNGLR                   | 1 | 6753262;83649737                                                                                                              | N-Term(iTRAQ4plex), N4(Deamidated)                 | 931.53484  | 37 |      | Expt1 |
| LLLMPLK                   | 1 | 210147430;133922580                                                                                                           | N-Term(iTRAQ4plex), K7(iTRAQ4plex)                 | 1115.75481 | 37 |      | Expt1 |
| TIGSLEAEADSGLSTDESEPATSPR | 1 | 162417980                                                                                                                     | N-Term(iTRAQ4plex)                                 | 2664.26841 | 37 |      | Expt1 |
| MGVPYCIK                  | 1 | 149250878;149253661;149256849;149257810;149258982;94385930;149259749;149260113;94386298;82930638;82949769;149267965;149272351 | N-Term(iTRAQ4plex), C6(Methylthio), K9(iTRAQ4plex) | 1357.73174 | 37 |      | Expt1 |
| SLEQNVQLPAALLSR           | 2 | 10242373                                                                                                                      | N-Term(iTRAQ4plex)                                 | 1783.02207 | 37 | 3.41 | Expt1 |
| IGSIVGECATDLDEPDTMHTR     | 2 | 7305007                                                                                                                       | N-Term(iTRAQ4plex), C9(Methylthio), M19(Oxidation) | 2565.18637 | 37 | 3.01 | Expt1 |
| LAQFVAR                   | 1 | 119672912                                                                                                                     | N-Term(iTRAQ4plex), Q3(Deamidated)                 | 949.55750  | 37 |      | Expt1 |
| SWTLTAPPGYR               | 1 | 54112422;6754642                                                                                                              | N-Term(iTRAQ4plex)                                 | 1392.73735 | 37 |      | Expt1 |
| QLQDEMLR                  | 3 | 9506843;162287370;161760667                                                                                                   | N-Term(iTRAQ4plex)                                 | 1176.61345 | 37 | 3.12 | Expt1 |
| ELPVNAQNYVR               | 3 | 31560737                                                                                                                      | N-Term(iTRAQ4plex)                                 | 1446.78630 | 37 | 2.99 | Expt1 |
| CTVVSVPDSSLWR             | 1 | 123701966                                                                                                                     | N-Term(iTRAQ4plex), C1(Methylthio)                 | 1664.86576 | 37 |      | Expt1 |
| EAGVFPVR                  | 1 | 29293809                                                                                                                      | N-Term(iTRAQ4plex)                                 | 1018.58110 | 37 |      | Expt1 |
| LDGLCIPLR                 | 1 | 124494256                                                                                                                     | N-Term(iTRAQ4plex), C5(Methylthio)                 | 1189.65862 | 37 |      | Expt1 |
| GLDEDETNFLDEVSR           | 2 | 31560083                                                                                                                      | N-Term(iTRAQ4plex)                                 | 1882.88115 | 37 | 3.30 | Expt1 |
| ALMDSLGPWEVR              | 2 | 13385500                                                                                                                      | N-Term(iTRAQ4plex)                                 | 1418.72417 | 37 | 3.31 | Expt1 |
| FTGQAVELFDEEFR            | 1 | 169646258                                                                                                                     | N-Term(iTRAQ4plex)                                 | 1831.90386 | 37 |      | Expt1 |
| ASVYVQDLQGGGR             | 2 | 227496223                                                                                                                     | N-Term(iTRAQ4plex)                                 | 1564.82341 | 37 | 3.14 | Expt1 |
| AQPSVSLGAAYR              | 2 | 86262142                                                                                                                      | N-Term(iTRAQ4plex)                                 | 1363.74626 | 37 | 2.84 | Expt1 |
| GNENANGAPAITLLVR          | 1 | 154350222                                                                                                                     | N-Term(iTRAQ4plex), N6(Deamidated)                 | 1754.95452 | 37 |      | Expt1 |
| SLAWGPGLQAAAVLPVR         | 1 | 47078285                                                                                                                      | N-Term(iTRAQ4plex)                                 | 1850.08097 | 37 |      | Expt1 |
| WQIGEQEFEALMR             | 2 | 156255173;7304861;156255171                                                                                                   | N-Term(iTRAQ4plex)                                 | 1780.88835 | 37 | 3.12 | Expt1 |
| GLFLPEDENLR               | 4 | 125628659                                                                                                                     | N-Term(iTRAQ4plex)                                 | 1446.77239 | 37 | 3.54 | Expt1 |
| VSGISMDVAVPENTGQDSAR      | 2 | 183979966                                                                                                                     | N-Term(iTRAQ4plex), M6(Oxidation)                  | 2193.06113 | 37 | 2.85 | Expt1 |
| IFVFEPPIPGVK              | 3 | 134288917                                                                                                                     | N-Term(iTRAQ4plex), K11(iTRAQ4plex)                | 1517.91069 | 37 | 3.28 | Expt1 |
| FMEQVIFK                  | 1 | 23956222                                                                                                                      | N-Term(iTRAQ4plex), M2(Oxidation), K8(iTRAQ4plex)  | 1345.74736 | 37 |      | Expt1 |
| ISTPVDVNNR                | 1 | 6753320                                                                                                                       | N-Term(iTRAQ4plex)                                 | 1258.68816 | 37 |      | Expt1 |
| VCADLIR                   | 1 | 13385652                                                                                                                      | N-Term(iTRAQ4plex), C2(Methylthio)                 | 979.51988  | 37 |      | Expt1 |
| AVFDETYPPDVR              | 2 | 34610207                                                                                                                      | N-Term(iTRAQ4plex)                                 | 1552.77764 | 37 | 3.74 | Expt1 |
| ALAEALAA                  | 1 | 28916693                                                                                                                      | N-Term(iTRAQ4plex)                                 | 802.48169  | 37 |      | Expt1 |
| IEGLLAFFPK                | 1 | 148747410;94401916;149269203                                                                                                  | N-Term(iTRAQ4plex), K10(iTRAQ4plex)                | 1346.83794 | 37 |      | Expt1 |
| VIFVGEDAVIDAGGVR          | 1 | 32451488                                                                                                                      | N-Term(iTRAQ4plex)                                 | 1647.88201 | 37 |      | Expt1 |
| FLSPSILR                  | 1 | 31981509                                                                                                                      | N-Term(iTRAQ4plex)                                 | 1076.65862 | 37 |      | Expt1 |
| MLEEELEAMR                | 1 | 82950147;149264086                                                                                                            | N-Term(iTRAQ4plex), M9(Oxidation)                  | 1410.67620 | 37 |      | Expt1 |
| LFDAPEVPLPSR              | 2 | 227330586                                                                                                                     | N-Term(iTRAQ4plex)                                 | 1484.82536 | 36 | 3.05 | Expt1 |
| EFLSELQR                  | 1 | 39930477                                                                                                                      | N-Term(iTRAQ4plex)                                 | 1165.64006 | 36 |      | Expt1 |
| CLCLPGFSGPR               | 1 | 183979966                                                                                                                     | N-Term(iTRAQ4plex), C1(Methylthio), C3(Methylthio) | 1385.63457 | 36 |      | Expt1 |



|                             |   |                                                                                                                                                                                                                                                                                                                                                                                                                                                                                               |                                                                       |            |    |      |       |
|-----------------------------|---|-----------------------------------------------------------------------------------------------------------------------------------------------------------------------------------------------------------------------------------------------------------------------------------------------------------------------------------------------------------------------------------------------------------------------------------------------------------------------------------------------|-----------------------------------------------------------------------|------------|----|------|-------|
| IADFLGAR                    | 6 | 33859570;171543837;3473405<br>6;6678617;171543841;6680908<br>;94363446;149241266;1492521<br>49;116089355;116089349;1578<br>16961;161086911;120952698;1<br>12293260;31542366;31982490;<br>160333476;34556205;7242173;<br>161760634;161760636;675338<br>0;18699998;189409171;468770<br>57;120952633;6679233;171542<br>819;7949020;14149637;224809<br>542;224809552;157816935;120<br>952641;16716469;224809525;1<br>57824204;124486698;2540282<br>52;254028254;255522770;2873<br>23109;244791455 | N-Term(iTRAQ4plex)                                                    | 1006.58202 | 36 | 2.84 | Expt1 |
| GASQAGMTGYGMPR              | 1 | 30519911;9790125                                                                                                                                                                                                                                                                                                                                                                                                                                                                              | N-Term(iTRAQ4plex), M7(Oxidation)                                     | 1543.71501 | 36 |      | Expt1 |
| GFLWYSGR                    | 3 | 125490382                                                                                                                                                                                                                                                                                                                                                                                                                                                                                     | N-Term(iTRAQ4plex)                                                    | 1242.67888 | 36 | 3.42 | Expt1 |
| GSICPEEGIGAGTELR            | 2 | 224967060                                                                                                                                                                                                                                                                                                                                                                                                                                                                                     | N-Term(iTRAQ4plex), C4(Methylthio)                                    | 1778.85625 | 36 | 3.24 | Expt1 |
| IMPALALQLR                  | 2 | 8394362                                                                                                                                                                                                                                                                                                                                                                                                                                                                                       | N-Term(iTRAQ4plex), M2(Oxidation)                                     | 1382.83367 | 36 | 3.33 | Expt1 |
| QYENFINR                    | 4 | 112421039                                                                                                                                                                                                                                                                                                                                                                                                                                                                                     | N-Term(iTRAQ4plex)                                                    | 1227.62663 | 36 | 3.14 | Expt1 |
| FLPLFDR                     | 1 | 6680309                                                                                                                                                                                                                                                                                                                                                                                                                                                                                       | N-Term(iTRAQ4plex)                                                    | 1051.60784 | 36 |      | Expt1 |
| EMFPYEASTPTGISASCR          | 1 | 121949767;121949763;121949<br>765;121949769                                                                                                                                                                                                                                                                                                                                                                                                                                                   | N-Term(iTRAQ4plex), M2(Oxidation), C17(Methylthio)                    | 2152.94682 | 36 |      | Expt1 |
| DFPLTGYVELR                 | 3 | 58037117                                                                                                                                                                                                                                                                                                                                                                                                                                                                                      | N-Term(iTRAQ4plex)                                                    | 1453.78533 | 36 | 3.42 | Expt1 |
| LLDVMDR                     | 1 | 114145467                                                                                                                                                                                                                                                                                                                                                                                                                                                                                     | N-Term(iTRAQ4plex)                                                    | 1005.55370 | 36 |      | Expt1 |
| YFVEAGAMAVR                 | 2 | 110625624                                                                                                                                                                                                                                                                                                                                                                                                                                                                                     | N-Term(iTRAQ4plex), M8(Oxidation)                                     | 1373.70586 | 36 | 2.93 | Expt1 |
| LGLLVDTVGPR                 | 1 | 28570174                                                                                                                                                                                                                                                                                                                                                                                                                                                                                      | N-Term(iTRAQ4plex)                                                    | 1283.79534 | 36 |      | Expt1 |
| LMCPQEIVDIADK               | 2 | 149258261;27754007                                                                                                                                                                                                                                                                                                                                                                                                                                                                            | N-Term(iTRAQ4plex), M2(Oxidation), C3(Methylthio),<br>K14(iTRAQ4plex) | 1987.98117 | 36 | 3.28 | Expt1 |
| LALDMEISAYR                 | 2 | 188219589;113195686                                                                                                                                                                                                                                                                                                                                                                                                                                                                           | N-Term(iTRAQ4plex)                                                    | 1425.75627 | 36 | 3.40 | Expt1 |
| VMVDSLVEQEIR                | 1 | 29789351                                                                                                                                                                                                                                                                                                                                                                                                                                                                                      | N-Term(iTRAQ4plex)                                                    | 1561.83928 | 36 |      | Expt1 |
| ALYEAELSQMTHISDTSVVLMSMDNRR | 2 | 54607171                                                                                                                                                                                                                                                                                                                                                                                                                                                                                      | N-Term(iTRAQ4plex)                                                    | 3196.53623 | 36 | 3.57 | Expt1 |
| GAETTLALPMASDLELYDVTENSMR   | 1 | 226423922                                                                                                                                                                                                                                                                                                                                                                                                                                                                                     | N-Term(iTRAQ4plex), M10(Oxidation), M24(Oxidation)                    | 2903.37668 | 36 |      | Expt1 |
| LSTLCPSAVLQR                | 2 | 189409138                                                                                                                                                                                                                                                                                                                                                                                                                                                                                     | N-Term(iTRAQ4plex), C5(Methylthio)                                    | 1477.80181 | 36 | 3.18 | Expt1 |
| SLQLLMDR                    | 1 | 18079341                                                                                                                                                                                                                                                                                                                                                                                                                                                                                      | N-Term(iTRAQ4plex)                                                    | 1119.63310 | 36 |      | Expt1 |
| IYLELR                      | 1 | 40254600                                                                                                                                                                                                                                                                                                                                                                                                                                                                                      | N-Term(iTRAQ4plex)                                                    | 950.57982  | 36 |      | Expt1 |
| CDLEIYQLK                   | 1 | 112421039                                                                                                                                                                                                                                                                                                                                                                                                                                                                                     | N-Term(iTRAQ4plex), C1(Methylthio), K9(iTRAQ4plex)                    | 1458.75409 | 36 |      | Expt1 |
| TDMDNQIVVSDYQAMDR           | 2 | 6753322                                                                                                                                                                                                                                                                                                                                                                                                                                                                                       | N-Term(iTRAQ4plex), M3(Oxidation)                                     | 2160.96769 | 36 | 3.01 | Expt1 |
| TIQGDDEDLR                  | 3 | 13385392                                                                                                                                                                                                                                                                                                                                                                                                                                                                                      | N-Term(iTRAQ4plex)                                                    | 1319.65801 | 36 | 3.57 | Expt1 |
| VDFPFTAIGVVLER              | 1 | 189181668                                                                                                                                                                                                                                                                                                                                                                                                                                                                                     | N-Term(iTRAQ4plex)                                                    | 1559.89580 | 36 |      | Expt1 |
| EPAFEDITLESER               | 1 | 9055218                                                                                                                                                                                                                                                                                                                                                                                                                                                                                       | N-Term(iTRAQ4plex)                                                    | 1679.82659 | 36 |      | Expt1 |
| EVTQEVVR                    | 2 | 111185907                                                                                                                                                                                                                                                                                                                                                                                                                                                                                     | N-Term(iTRAQ4plex)                                                    | 1103.61968 | 36 |      | Expt1 |
| DVGLPLCQALLEAENGPNDR        | 2 | 158517895                                                                                                                                                                                                                                                                                                                                                                                                                                                                                     | N-Term(iTRAQ4plex), C7(Methylthio)                                    | 2314.13816 | 36 | 4.25 | Expt1 |
| MFLGDAVDVFEAR               | 2 | 24497431                                                                                                                                                                                                                                                                                                                                                                                                                                                                                      | N-Term(iTRAQ4plex)                                                    | 1613.81462 | 36 | 3.39 | Expt1 |
| SQASGIEVIQLFPEK             | 2 | 6755004                                                                                                                                                                                                                                                                                                                                                                                                                                                                                       | N-Term(iTRAQ4plex), K15(iTRAQ4plex)                                   | 1934.09085 | 36 | 3.57 | Expt1 |
| ELANTPDCPR                  | 2 | 9790159                                                                                                                                                                                                                                                                                                                                                                                                                                                                                       | N-Term(iTRAQ4plex), C8(Methylthio)                                    | 1305.60503 | 36 | 3.05 | Expt1 |
| DYFVSCPGR                   | 2 | 160358829                                                                                                                                                                                                                                                                                                                                                                                                                                                                                     | N-Term(iTRAQ4plex), C6(Methylthio)                                    | 1233.55522 | 36 | 2.93 | Expt1 |
| YQAQGLPLIVLAGK              | 2 | 110347487                                                                                                                                                                                                                                                                                                                                                                                                                                                                                     | N-Term(iTRAQ4plex), K14(iTRAQ4plex)                                   | 1759.07480 | 36 | 3.30 | Expt1 |
| MMEIMTR                     | 1 | 94395665;149265827                                                                                                                                                                                                                                                                                                                                                                                                                                                                            | N-Term(iTRAQ4plex)                                                    | 1055.51677 | 36 |      | Expt1 |
| MLPLLEVAEK                  | 1 | 86439989                                                                                                                                                                                                                                                                                                                                                                                                                                                                                      | N-Term(iTRAQ4plex), M1(Oxidation), K10(iTRAQ4plex)                    | 1446.85686 | 36 |      | Expt1 |
| AEAELCSEAEETR               | 3 | 29336026                                                                                                                                                                                                                                                                                                                                                                                                                                                                                      | N-Term(iTRAQ4plex), C6(Methylthio)                                    | 1627.70549 | 36 | 4.09 | Expt1 |
| GAEEEMTIVIPVDVMR            | 2 | 55741460                                                                                                                                                                                                                                                                                                                                                                                                                                                                                      | N-Term(iTRAQ4plex), M5(Oxidation), M14(Oxidation)                     | 1851.89389 | 36 | 3.49 | Expt1 |
| FGVIFAGAQK                  | 1 | 149258641;149258643;542921<br>32                                                                                                                                                                                                                                                                                                                                                                                                                                                              | N-Term(iTRAQ4plex), K10(iTRAQ4plex)                                   | 1325.77475 | 36 |      | Expt1 |
| LEEFFAR                     | 1 | 6996917                                                                                                                                                                                                                                                                                                                                                                                                                                                                                       | N-Term(iTRAQ4plex)                                                    | 1055.56767 | 36 |      | Expt1 |
| AEILSNWNMFVGSQATNYGEDLTR    | 1 | 188035858                                                                                                                                                                                                                                                                                                                                                                                                                                                                                     | N-Term(iTRAQ4plex), M9(Oxidation)                                     | 2876.37650 | 36 |      | Expt1 |
| DFLIPIGK                    | 4 | 18152793                                                                                                                                                                                                                                                                                                                                                                                                                                                                                      | N-Term(iTRAQ4plex), K8(iTRAQ4plex)                                    | 1190.73174 | 36 | 3.55 | Expt1 |

|                    |   |                                                                                                                         |                                                    |            |    |      |       |
|--------------------|---|-------------------------------------------------------------------------------------------------------------------------|----------------------------------------------------|------------|----|------|-------|
| GVQYLNEIK          | 2 | 149253258;33859482                                                                                                      | N-Term(iTRAQ4plex), K9(iTRAQ4plex)                 | 1351.78716 | 36 | 3.69 | Expt1 |
| DMDVVSGR           | 1 | 6753824                                                                                                                 | N-Term(iTRAQ4plex), M2(Oxidation)                  | 1038.50102 | 36 |      | Expt1 |
| LGDLYEEEMR         | 5 | 31982755                                                                                                                | N-Term(iTRAQ4plex), M9(Oxidation)                  | 1414.66765 | 36 |      | Expt1 |
| MLEEELEAMR         | 1 | 82950147;149264086                                                                                                      | N-Term(iTRAQ4plex), M1(Oxidation), M9(Oxidation)   | 1426.67070 | 36 |      | Expt1 |
| YSPTVQTR           | 1 | 112421039                                                                                                               | N-Term(iTRAQ4plex)                                 | 1095.59258 | 36 |      | Expt1 |
| LVVSPR             | 1 | 109627652;237757318;237757324;237757322                                                                                 | N-Term(iTRAQ4plex)                                 | 814.52532  | 36 |      | Expt1 |
| DLPPVLLVR          | 1 | 149270069;124517716                                                                                                     | N-Term(iTRAQ4plex)                                 | 1165.74065 | 36 |      | Expt1 |
| NLPPVLLVR          | 1 | 119226231;119226233                                                                                                     | N-Term(iTRAQ4plex), N1(Deamidated)                 | 1165.74065 | 36 |      | Expt1 |
| SMNIFGGFR          | 1 | 27369998                                                                                                                | N-Term(iTRAQ4plex)                                 | 1172.60478 | 36 |      | Expt1 |
| EGPLCDELIR         | 1 | 6755594;158508674                                                                                                       | N-Term(iTRAQ4plex), C5(Methylthio)                 | 1334.65495 | 36 |      | Expt1 |
| LPALVPPPPALR       | 1 | 22094119                                                                                                                | N-Term(iTRAQ4plex)                                 | 1481.93378 | 36 |      | Expt1 |
| CNGVLEGIR          | 2 | 29336026;33598964;114326446;82935925;94397543;124486959;205830428;145864471;6754774;82524274;18859641;67189167;71143152 | N-Term(iTRAQ4plex), C1(Methylthio), N2(Deamidated) | 1151.56536 | 36 |      | Expt1 |
| ANILEDSYR          | 3 | 56699423                                                                                                                | N-Term(iTRAQ4plex)                                 | 1224.63347 | 36 | 3.16 | Expt1 |
| DAFADAVQR          | 1 | 163954948                                                                                                               | N-Term(iTRAQ4plex)                                 | 1136.58000 | 36 |      | Expt1 |
| GLQGFLELMR         | 1 | 124249090                                                                                                               | N-Term(iTRAQ4plex), M9(Oxidation)                  | 1323.72527 | 36 |      | Expt1 |
| AITDRV             | 1 | 183074533;183074530;183074537                                                                                           | N-Term(iTRAQ4plex)                                 | 974.57720  | 36 |      | Expt1 |
| CPFTGNVSIR         | 1 | 21426889;149263120                                                                                                      | N-Term(iTRAQ4plex), C1(Methylthio)                 | 1283.63408 | 36 |      | Expt1 |
| MGESDDSIIR         | 1 | 94400159;21536222                                                                                                       | N-Term(iTRAQ4plex), M1(Oxidation)                  | 1282.60845 | 36 |      | Expt1 |
| GLPWSCSAEEVMR      | 1 | 9845253                                                                                                                 | N-Term(iTRAQ4plex), C6(Methylthio)                 | 1654.75554 | 36 |      | Expt1 |
| MAQALDLR           | 2 | 113195686                                                                                                               | N-Term(iTRAQ4plex)                                 | 1190.63445 | 36 | 3.05 | Expt1 |
| FYVMWVK            | 1 | 149249577;47059073                                                                                                      | N-Term(iTRAQ4plex), K7(iTRAQ4plex)                 | 1260.71355 | 36 |      | Expt1 |
| VTTYPQTTIR         | 2 | 31657132                                                                                                                | N-Term(iTRAQ4plex)                                 | 1323.74126 | 36 | 2.90 | Expt1 |
| LEASIER            | 1 | 13384618                                                                                                                | N-Term(iTRAQ4plex)                                 | 961.54442  | 36 |      | Expt1 |
| TLEDEEEQER         | 2 | 31981555                                                                                                                | N-Term(iTRAQ4plex)                                 | 1421.65288 | 36 | 3.17 | Expt1 |
| IVAECNAVR          | 2 | 157951729;157951727;6753294                                                                                             | N-Term(iTRAQ4plex), C5(Methylthio)                 | 1164.60051 | 35 | 2.91 | Expt1 |
| VGDPQELNGITR       | 2 | 93102409                                                                                                                | N-Term(iTRAQ4plex), N8(Deamidated)                 | 1443.75920 | 35 | 3.05 | Expt1 |
| LIFLNFVR           | 1 | 159110817                                                                                                               | N-Term(iTRAQ4plex)                                 | 1165.72429 | 35 |      | Expt1 |
| LGMYYLLK           | 1 | 226531047;226531069                                                                                                     | N-Term(iTRAQ4plex), K9(iTRAQ4plex)                 | 1367.82268 | 35 |      | Expt1 |
| ESVQVPDDQDFR       | 3 | 9910482                                                                                                                 | N-Term(iTRAQ4plex)                                 | 1578.75517 | 35 | 3.77 | Expt1 |
| GLPDLQR            | 1 | 21313520                                                                                                                | N-Term(iTRAQ4plex)                                 | 942.54881  | 35 |      | Expt1 |
| VEFEELCADLDFR      | 1 | 157951706                                                                                                               | N-Term(iTRAQ4plex), C7(Methylthio)                 | 1775.81987 | 35 |      | Expt1 |
| TAVAPIER           | 8 | 22094075;148747424;254692892                                                                                            | N-Term(iTRAQ4plex)                                 | 1000.59099 | 35 | 2.93 | Expt1 |
| FYEDQYGVSLFNMR     | 2 | 22122641                                                                                                                | N-Term(iTRAQ4plex)                                 | 1999.93364 | 35 | 2.92 | Expt1 |
| VPGFSDDPTELQCR     | 1 | 50845420                                                                                                                | N-Term(iTRAQ4plex), C13(Methylthio)                | 1753.80510 | 35 |      | Expt1 |
| VIDQNGLYR          | 3 | 18390321;255982530                                                                                                      | N-Term(iTRAQ4plex), N6(Deamidated)                 | 1350.71782 | 35 | 3.22 | Expt1 |
| LILPGLISSR         | 2 | 149251616                                                                                                               | N-Term(iTRAQ4plex)                                 | 1212.77934 | 35 |      | Expt1 |
| FITDCTGLFSER       | 1 | 227330590                                                                                                               | N-Term(iTRAQ4plex), C5(Methylthio)                 | 1578.74516 | 35 |      | Expt1 |
| YNLGLDLR           | 1 | 6680027                                                                                                                 | N-Term(iTRAQ4plex)                                 | 1107.63164 | 35 |      | Expt1 |
| NDLAVVDVR          | 2 | 84875537                                                                                                                | N-Term(iTRAQ4plex)                                 | 1144.64238 | 35 | 3.09 | Expt1 |
| EGDGSATTTDAAPATSPK | 2 | 6679935                                                                                                                 | N-Term(iTRAQ4plex), K17(iTRAQ4plex)                | 1863.91733 | 35 | 2.99 | Expt1 |
| NPSVLLTLR          | 1 | 170650724                                                                                                               | N-Term(iTRAQ4plex)                                 | 1156.71965 | 35 |      | Expt1 |
| TTVINMPR           | 3 | 82892305;94380332;13507626;21539593                                                                                     | N-Term(iTRAQ4plex)                                 | 1075.60491 | 35 | 2.85 | Expt1 |
| TEDSLMPEEEFLR      | 2 | 165932270                                                                                                               | N-Term(iTRAQ4plex)                                 | 1739.83000 | 35 | 3.39 | Expt1 |
| DSEPAEAGGIQR       | 2 | 149269540;29568084                                                                                                      | N-Term(iTRAQ4plex)                                 | 1373.67734 | 35 | 2.91 | Expt1 |
| IGVTVLSR           | 2 | 82975294;113680352;51830180                                                                                             | N-Term(iTRAQ4plex)                                 | 988.62950  | 35 | 3.24 | Expt1 |
| ALEVEEER           | 1 | 183979966                                                                                                               | N-Term(iTRAQ4plex), C7(Methylthio)                 | 1138.53618 | 35 |      | Expt1 |
| MNGLLLNDR          | 1 | 149261934                                                                                                               | N-Term(iTRAQ4plex), N2(Deamidated)                 | 1190.61858 | 35 |      | Expt1 |
| QTMQDLNDR          | 2 | 122425580                                                                                                               | N-Term(iTRAQ4plex), Q1(Deamidated), M3(Oxidation)  | 1281.58989 | 35 |      | Expt1 |

|                             |    |                                                                                                                           |                                                                     |            |    |      |       |
|-----------------------------|----|---------------------------------------------------------------------------------------------------------------------------|---------------------------------------------------------------------|------------|----|------|-------|
| TTYQALPCLPSMYSYPNR          | 2  | 226823359                                                                                                                 | N-Term(iTRAQ4plex), C8(Methylthio)                                  | 2295.07926 | 35 | 3.07 | Expt1 |
| FESPEVAER                   | 3  | 21313308;158186704                                                                                                        | N-Term(iTRAQ4plex)                                                  | 1207.61089 | 35 | 3.40 | Expt1 |
| FTILCTR                     | 4  | 149265291;22165408                                                                                                        | N-Term(iTRAQ4plex), C6(Methylthio)                                  | 1156.63616 | 35 | 3.10 | Expt1 |
| NNVTPDMMEEMYK               | 1  | 149250073;149257749                                                                                                       | N-Term(iTRAQ4plex), M11(Oxidation), K13(iTRAQ4plex)                 | 1905.86809 | 35 |      | Expt1 |
| GFIPNIR                     | 2  | 118197277;118136302                                                                                                       | N-Term(iTRAQ4plex)                                                  | 960.57384  | 35 |      | Expt1 |
| AEGAALSEER                  | 2  | 23943828                                                                                                                  | N-Term(iTRAQ4plex)                                                  | 1304.65911 | 35 | 3.40 | Expt1 |
| MAGDPVANVR                  | 2  | 8394027                                                                                                                   | N-Term(iTRAQ4plex)                                                  | 1173.61785 | 34 | 3.03 | Expt1 |
| TFVDSR                      | 2  | 169234958;32129201                                                                                                        | N-Term(iTRAQ4plex)                                                  | 967.53502  | 34 | 2.90 | Expt1 |
| YADESGNMDFDNFISCLVR         | 2  | 110227381                                                                                                                 | N-Term(iTRAQ4plex), M8(Oxidation), C16(Methylthio)                  | 2402.02666 | 34 |      | Expt1 |
| TFCGTPEYLAPEVLEDNDYGR       | 1  | 149256990;149263735;149263737;190883484                                                                                   | N-Term(iTRAQ4plex), C3(Methylthio)                                  | 2579.16062 | 34 |      | Expt1 |
| ESILEITSR                   | 1  | 31981302;158966670                                                                                                        | N-Term(iTRAQ4plex)                                                  | 1304.75737 | 34 |      | Expt1 |
| VVVP                        | 3  | 31981562                                                                                                                  | N-Term(iTRAQ4plex)                                                  | 654.43256  | 34 |      | Expt1 |
| NLMFLVLR                    | 1  | 219276601;219275596                                                                                                       | N-Term(iTRAQ4plex)                                                  | 1149.69768 | 34 |      | Expt1 |
| LWWDLK                      | 1  | 160358829                                                                                                                 | N-Term(iTRAQ4plex), K7(iTRAQ4plex)                                  | 1261.76262 | 34 |      | Expt1 |
| AMVLDLR                     | 4  | 20137004;71725358                                                                                                         | N-Term(iTRAQ4plex)                                                  | 961.56297  | 34 | 2.87 | Expt1 |
| EWYETR                      | 2  | 149262636;118130981                                                                                                       | N-Term(iTRAQ4plex)                                                  | 1027.49658 | 34 |      | Expt1 |
| GLLSILR                     | 1  | 9789881                                                                                                                   | N-Term(iTRAQ4plex)                                                  | 915.61510  | 34 |      | Expt1 |
| ESLLFEGR                    | 1  | 225735584;225735582                                                                                                       | N-Term(iTRAQ4plex)                                                  | 1094.59331 | 34 |      | Expt1 |
| QMLFDLESAYNAFNR             | 1  | 13385320                                                                                                                  | N-Term(iTRAQ4plex)                                                  | 1962.95267 | 34 |      | Expt1 |
| YLLPAILNPR                  | 2  | 225543183                                                                                                                 | N-Term(iTRAQ4plex)                                                  | 1313.80753 | 34 |      | Expt1 |
| DLAPTGIR                    | 1  | 61888838                                                                                                                  | N-Term(iTRAQ4plex)                                                  | 986.57463  | 34 |      | Expt1 |
| APESDTGDGEDQDQER            | 1  | 7305029;54873604                                                                                                          | N-Term(iTRAQ4plex)                                                  | 1835.77422 | 34 |      | Expt1 |
| TEVPPLLLILDR                | 2  | 7305631                                                                                                                   | N-Term(iTRAQ4plex)                                                  | 1522.93596 | 34 | 3.09 | Expt1 |
| SGQGAFGNMCR                 | 2  | 30794450                                                                                                                  | N-Term(iTRAQ4plex), C10(Methylthio)                                 | 1317.56047 | 34 | 2.85 | Expt1 |
| DDFDHNDVPDIDDICPENFDISETDFR | 2  | 149249577;47059073                                                                                                        | N-Term(iTRAQ4plex), C15(Methylthio)                                 | 3388.40512 | 34 | 3.12 | Expt1 |
| CSCSPGWIGDGIK               | 1  | 118197277                                                                                                                 | N-Term(iTRAQ4plex), C1(Methylthio), C3(Methylthio), K13(iTRAQ4plex) | 1702.76811 | 34 |      | Expt1 |
| VIIIGSGVSGLAAR              | 2  | 149253033;224994233                                                                                                       | N-Term(iTRAQ4plex)                                                  | 1527.93682 | 34 | 3.07 | Expt1 |
| GDTTITMLR                   | 1  | 111074529                                                                                                                 | N-Term(iTRAQ4plex), M7(Oxidation)                                   | 1155.58306 | 34 |      | Expt1 |
| NIPITLK                     | 1  | 8394460;84697031;11230778                                                                                                 | N-Term(iTRAQ4plex), K8(iTRAQ4plex)                                  | 1183.75920 | 34 |      | Expt1 |
| TVAQVLIR                    | 3  | 160415215                                                                                                                 | N-Term(iTRAQ4plex)                                                  | 1043.66802 | 34 | 2.87 | Expt1 |
| SLSYLR                      | 14 | 6681143;160333308                                                                                                         | N-Term(iTRAQ4plex)                                                  | 882.52159  | 34 |      | Expt1 |
| AYIDSFR                     | 1  | 211065507                                                                                                                 | N-Term(iTRAQ4plex)                                                  | 1015.53490 | 34 |      | Expt1 |
| GLLGR                       | 4  | 124487346;8393173                                                                                                         | N-Term(iTRAQ4plex)                                                  | 756.48400  | 34 |      | Expt1 |
| YPEGSPEER                   | 1  | 6678329                                                                                                                   | N-Term(iTRAQ4plex)                                                  | 1207.57451 | 34 |      | Expt1 |
| ADPSQDVR                    | 1  | 6753484                                                                                                                   | N-Term(iTRAQ4plex)                                                  | 1031.52507 | 34 |      | Expt1 |
| LASYLGK                     | 2  | 149262636;118130981                                                                                                       | N-Term(iTRAQ4plex), K7(iTRAQ4plex)                                  | 1039.64714 | 34 | 2.90 | Expt1 |
| DMFQETMEAMR                 | 2  | 114326446                                                                                                                 | N-Term(iTRAQ4plex)                                                  | 1532.66789 | 34 | 3.79 | Expt1 |
| DGPGFYTTR                   | 2  | 33859811                                                                                                                  | N-Term(iTRAQ4plex)                                                  | 1157.57121 | 33 | 2.86 | Expt1 |
| GQPFVDGPR                   | 1  | 21489933                                                                                                                  | N-Term(iTRAQ4plex)                                                  | 1116.59209 | 33 |      | Expt1 |
| LDASESLR                    | 1  | 51491845                                                                                                                  | N-Term(iTRAQ4plex)                                                  | 1034.55937 | 33 |      | Expt1 |
| GAYGGGYGGYDDYNGYNDGYGFGSDR  | 1  | 10946928                                                                                                                  | N-Term(iTRAQ4plex), N17(Deamidated)                                 | 2862.13896 | 33 |      | Expt1 |
| DSSTSPGDYVLSVSENSR          | 1  | 31559995                                                                                                                  | N-Term(iTRAQ4plex)                                                  | 2043.95915 | 33 |      | Expt1 |
| AIPLIANR                    | 1  | 84794609                                                                                                                  | N-Term(iTRAQ4plex)                                                  | 1011.64470 | 33 |      | Expt1 |
| CNDTIPEDFQEQFTQSFDR         | 3  | 6755781                                                                                                                   | N-Term(iTRAQ4plex), C1(Methylthio)                                  | 2510.07639 | 33 | 3.08 | Expt1 |
| AWAVAR                      | 1  | 163310765;8567364                                                                                                         | N-Term(iTRAQ4plex)                                                  | 817.48338  | 33 |      | Expt1 |
| TVSPALIAR                   | 1  | 189409138                                                                                                                 | N-Term(iTRAQ4plex)                                                  | 1071.66374 | 33 |      | Expt1 |
| ICDFGLAR                    | 2  | 21489933;6754632;149262258;34328180;6679813;122937353;29244575;226342982;134032016;27777648;170650719;170650721;226371752 | N-Term(iTRAQ4plex), C2(Methylthio)                                  | 1084.54070 | 33 |      | Expt1 |
| LLCGGGAADR                  | 2  | 6753036                                                                                                                   | N-Term(iTRAQ4plex), C3(Methylthio)                                  | 1193.58879 | 33 | 3.07 | Expt1 |
| EEYNGYTGAFR                 | 3  | 20330802                                                                                                                  | N-Term(iTRAQ4plex)                                                  | 1450.67314 | 33 | 3.47 | Expt1 |
| GICFIR                      | 7  | 6678359                                                                                                                   | N-Term(iTRAQ4plex), C3(Methylthio)                                  | 898.47521  | 33 |      | Expt1 |
| LADLMER                     | 1  | 7106242;85861182                                                                                                          | N-Term(iTRAQ4plex)                                                  | 991.53740  | 33 |      | Expt1 |

|                              |   |                                                                        |                                                                         |            |    |      |       |
|------------------------------|---|------------------------------------------------------------------------|-------------------------------------------------------------------------|------------|----|------|-------|
| VSTEVDAR                     | 2 | 33859640                                                               | N-Term(iTRAQ4plex)                                                      | 1020.54375 | 33 | 3.12 | Expt1 |
| QASPNIVALAGNK                | 2 | 113866024                                                              | N-Term(iTRAQ4plex), K14(iTRAQ4plex)                                     | 1683.99790 | 33 | 3.09 | Expt1 |
| EGTQADIEADR                  | 2 | 110624798                                                              | N-Term(iTRAQ4plex)                                                      | 1348.64763 | 33 | 3.49 | Expt1 |
| VVLVDR                       | 1 | 82950147;82950149;14926408<br>6                                        | N-Term(iTRAQ4plex)                                                      | 844.54051  | 33 |      | Expt1 |
| CYQLEFGR                     | 2 | 160707958                                                              | N-Term(iTRAQ4plex), C1(Methylthio)                                      | 1205.55779 | 33 | 3.05 | Expt1 |
| NFGEDMDDER                   | 1 | 31560656                                                               | N-Term(iTRAQ4plex), M6(Oxidation)                                       | 1387.55510 | 33 |      | Expt1 |
| IDFEAM                       | 1 | 149266483;157277948                                                    | N-Term(iTRAQ4plex), M7(Oxidation)                                       | 1014.45922 | 33 |      | Expt1 |
| CLAPMMSEVMR                  | 1 | 33859811                                                               | N-Term(iTRAQ4plex), C1(Methylthio)                                      | 1457.65813 | 33 |      | Expt1 |
| QNPSGFGAQA                   | 1 | 30409988                                                               | N-Term(iTRAQ4plex)                                                      | 1120.54961 | 33 |      | Expt1 |
| SVPPTLK                      | 1 | 170932548                                                              | N-Term(iTRAQ4plex), K7(iTRAQ4plex)                                      | 1029.64429 | 33 |      | Expt1 |
| NDPFYYDWYSLR                 | 2 | 6678814                                                                | N-Term(iTRAQ4plex)                                                      | 1782.82829 | 33 | 3.38 | Expt1 |
| MEEESGAPCVPSNGAPGPK          | 3 | 21313308;158186704                                                     | N-Term(iTRAQ4plex), C9(Methylthio), N14(Deamidated),<br>K20(iTRAQ4plex) | 2249.02018 | 32 | 4.02 | Expt1 |
| EDMAALEKDYEEVGVDSVEGEGEEGEEY | 1 | 6755901;34740335;51765047;8<br>2930560                                 | N-Term(iTRAQ4plex), K8(iTRAQ4plex)                                      | 3524.51328 | 32 |      | Expt1 |
| SQTNWGPESFR                  | 2 | 113195686                                                              | N-Term(iTRAQ4plex)                                                      | 1509.72051 | 32 | 3.46 | Expt1 |
| ECPAIDYTR                    | 1 | 40254521                                                               | N-Term(iTRAQ4plex), C2(Methylthio)                                      | 1257.57598 | 32 |      | Expt1 |
| MEYADVTR                     | 3 | 9507023                                                                | N-Term(iTRAQ4plex)                                                      | 1027.50041 | 32 |      | Expt1 |
| FGSGMNMGR                    | 1 | 21313308;158186704                                                     | N-Term(iTRAQ4plex)                                                      | 1100.51018 | 32 |      | Expt1 |
| IYISK                        | 8 | 6681143;61657921;20137008;5<br>8037491;45433560;40254635;1<br>10347402 | N-Term(iTRAQ4plex), K5(iTRAQ4plex)                                      | 911.57628  | 32 |      | Expt1 |
| DCVGDVTENQVCNK               | 1 | 149249577;47059073                                                     | N-Term(iTRAQ4plex), C2(Methylthio), C12(Methylthio),<br>K14(iTRAQ4plex) | 1903.81926 | 32 |      | Expt1 |
| NLILVVR                      | 4 | 51491845                                                               | N-Term(iTRAQ4plex)                                                      | 970.65434  | 32 |      | Expt1 |
| FDGVQDPR                     | 1 | 31980806                                                               | N-Term(iTRAQ4plex)                                                      | 1077.54546 | 32 |      | Expt1 |
| HTAAPTDPDGP                  | 1 | 9790169                                                                | N-Term(iTRAQ4plex)                                                      | 1323.63347 | 32 |      | Expt1 |
| LGGSAVISLEGKPL               | 2 | 149255823;66800924;82917245                                            | N-Term(iTRAQ4plex), K12(iTRAQ4plex)                                     | 1628.99333 | 32 | 2.95 | Expt1 |
| LLILALER                     | 1 | 115583687                                                              | N-Term(iTRAQ4plex)                                                      | 1084.72063 | 32 |      | Expt1 |
| GPESLAQEQMEGMLCR             | 1 | 55926127                                                               | N-Term(iTRAQ4plex), M10(Oxidation), M13(Oxidation),<br>C15(Methylthio)  | 2000.86832 | 32 |      | Expt1 |
| LLIEELR                      | 1 | 9506739                                                                | N-Term(iTRAQ4plex)                                                      | 1029.64324 | 32 |      | Expt1 |
| TIVLSLR                      | 1 | 167736365                                                              | N-Term(iTRAQ4plex)                                                      | 945.62444  | 32 |      | Expt1 |
| AMNAF                        | 2 | 21105853                                                               | N-Term(iTRAQ4plex)                                                      | 697.34894  | 31 |      | Expt1 |
| CLSFECPENYR                  | 2 | 168693628                                                              | N-Term(iTRAQ4plex), C1(Methylthio), C6(Methylthio)                      | 1596.64531 | 31 | 3.20 | Expt1 |
| VLLATLSIPITPER               | 2 | 146219837                                                              | N-Term(iTRAQ4plex)                                                      | 1667.02439 | 31 | 3.10 | Expt1 |
| ELLGQGLLLR                   | 3 | 149258001;22203755                                                     | N-Term(iTRAQ4plex)                                                      | 1255.78679 | 31 | 3.07 | Expt1 |
| SCAYCTDELFK                  | 1 | 110735428;110735426                                                    | N-Term(iTRAQ4plex), C2(Methylthio), C5(Methylthio),<br>K11(iTRAQ4plex)  | 1659.71538 | 31 |      | Expt1 |
| LQLVVLR                      | 1 | 160333863                                                              | N-Term(iTRAQ4plex)                                                      | 984.66783  | 31 |      | Expt1 |
| LLLLGR                       | 4 | 117959926                                                              | N-Term(iTRAQ4plex)                                                      | 828.58196  | 31 |      | Expt1 |
| LAVSSAA                      | 1 | 67906177                                                               | N-Term(iTRAQ4plex)                                                      | 762.44727  | 31 |      | Expt1 |
| FFAPECGR                     | 3 | 170650623                                                              | N-Term(iTRAQ4plex), C6(Methylthio)                                      | 1116.50823 | 31 |      | Expt1 |
| LTGECLGWMR                   | 1 | 82950147;82950149;14926408<br>6                                        | N-Term(iTRAQ4plex), C5(Methylthio)                                      | 1355.64348 | 31 |      | Expt1 |
| EVVESCR                      | 1 | 6678499                                                                | N-Term(iTRAQ4plex), C6(Methylthio)                                      | 1011.47295 | 31 |      | Expt1 |
| SLTIQPDPIVVPDGVVVSLEGK       | 2 | 6806917                                                                | N-Term(iTRAQ4plex), K22(iTRAQ4plex)                                     | 2550.47239 | 31 | 2.95 | Expt1 |
| TIADIIR                      | 2 | 6753320;14719434                                                       | N-Term(iTRAQ4plex)                                                      | 945.58782  | 31 |      | Expt1 |
| ALNDIS                       | 1 | 6678131                                                                | N-Term(iTRAQ4plex)                                                      | 776.42603  | 31 |      | Expt1 |
| IESILR                       | 1 | 148747219                                                              | N-Term(iTRAQ4plex)                                                      | 874.54919  | 31 |      | Expt1 |
| IQSLLR                       | 2 | 118344444;62243588                                                     | N-Term(iTRAQ4plex), Q2(Deamidated)                                      | 874.54919  | 31 |      | Expt1 |
| TDGFGIDTCR                   | 3 | 110227381                                                              | N-Term(iTRAQ4plex), C9(Methylthio)                                      | 1274.56389 | 30 | 3.70 | Expt1 |
| SILCLR                       | 1 | 149255313                                                              | N-Term(iTRAQ4plex), C4(Methylthio), C5(Methylthio)                      | 1043.49956 | 30 |      | Expt1 |
| GAGGYTCQSGSGWDFTK            | 1 | 82950147;82950149;14926408<br>6                                        | N-Term(iTRAQ4plex), C7(Methylthio), K18(iTRAQ4plex)                     | 2184.96073 | 30 |      | Expt1 |
| DCFGCLR                      | 4 | 6753178                                                                | N-Term(iTRAQ4plex), C2(Methylthio), C5(Methylthio)                      | 1049.41521 | 30 |      | Expt1 |
| SCIVR                        | 2 | 163310769;28076973                                                     | N-Term(iTRAQ4plex), C2(Methylthio)                                      | 767.40240  | 30 |      | Expt1 |

|                     |   |                                                                                                                                                                                                                    |                                                                                    |            |    |      |       |
|---------------------|---|--------------------------------------------------------------------------------------------------------------------------------------------------------------------------------------------------------------------|------------------------------------------------------------------------------------|------------|----|------|-------|
| LVLQDLR             | 1 | 29336026                                                                                                                                                                                                           | N-Term(iTRAQ4plex)                                                                 | 1000.62712 | 30 |      | Expt1 |
| CEYYCSPGYTLK        | 1 | 8394362                                                                                                                                                                                                            | N-Term(iTRAQ4plex), C1(Methylthio), C5(Methylthio), K12(iTRAQ4plex)                | 1806.78714 | 30 |      | Expt1 |
| IPISLVLR            | 1 | 110626165                                                                                                                                                                                                          | N-Term(iTRAQ4plex)                                                                 | 1054.71269 | 30 |      | Expt1 |
| AEEEEEDDDDELDETLSE  | 1 | 31982091                                                                                                                                                                                                           | N-Term(iTRAQ4plex)                                                                 | 2525.06870 | 30 |      | Expt1 |
| NCLALADDR           | 1 | 41152517                                                                                                                                                                                                           | N-Term(iTRAQ4plex), C2(Methylthio)                                                 | 1180.55730 | 30 |      | Expt1 |
| AEVGSPL             | 1 | 168229148                                                                                                                                                                                                          | N-Term(iTRAQ4plex)                                                                 | 816.45892  | 29 |      | Expt1 |
| DYDDMSPR            | 1 | 13384620                                                                                                                                                                                                           | N-Term(iTRAQ4plex)                                                                 | 1142.49297 | 29 |      | Expt1 |
| LLGLAVR             | 1 | 6755372                                                                                                                                                                                                            | N-Term(iTRAQ4plex)                                                                 | 942.62480  | 29 |      | Expt1 |
| LLSSPR              | 1 | 156938252                                                                                                                                                                                                          | N-Term(iTRAQ4plex)                                                                 | 929.58995  | 29 |      | Expt1 |
| CIDIDECR            | 1 | 165905609;165905611                                                                                                                                                                                                | N-Term(iTRAQ4plex), C1(Methylthio), C7(Methylthio)                                 | 1202.47783 | 29 |      | Expt1 |
| WDPASGR             | 2 | 111074529                                                                                                                                                                                                          | N-Term(iTRAQ4plex)                                                                 | 932.46984  | 29 |      | Expt1 |
| YVLSRR              | 1 | 6753428;38259206                                                                                                                                                                                                   | N-Term(iTRAQ4plex)                                                                 | 868.50090  | 29 |      | Expt1 |
| TFYSCTEGR           | 1 | 46849812                                                                                                                                                                                                           | N-Term(iTRAQ4plex), C5(Methylthio)                                                 | 1354.58843 | 28 |      | Expt1 |
| VLGPLIGVQPQEK       | 2 | 158081796                                                                                                                                                                                                          | N-Term(iTRAQ4plex), K14(iTRAQ4plex)                                                | 1765.08249 | 28 | 2.99 | Expt1 |
| FSCMCPQGYEVVR       | 1 | 149261823;164607147                                                                                                                                                                                                | N-Term(iTRAQ4plex), C3(Methylthio), M4(Oxidation), C5(Methylthio)                  | 1770.72844 | 28 |      | Expt1 |
| ICGGND              | 2 | 149265356;149265358;160707921                                                                                                                                                                                      | N-Term(iTRAQ4plex), C2(Methylthio)                                                 | 768.31525  | 28 |      | Expt1 |
| ILALVR              | 2 | 71043944;38372907                                                                                                                                                                                                  | N-Term(iTRAQ4plex)                                                                 | 828.58043  | 28 |      | Expt1 |
| DYLCDGQEDCR         | 2 | 149253040;183979966                                                                                                                                                                                                | N-Term(iTRAQ4plex), C4(Methylthio), C10(Methylthio)                                | 1552.56462 | 28 | 3.41 | Expt1 |
| GYFNEEMNR           | 1 | 37537522                                                                                                                                                                                                           | N-Term(iTRAQ4plex), N4(Deamidated), M7(Oxidation)                                  | 1320.56841 | 28 |      | Expt1 |
| SSGWGM              | 1 | 21704096                                                                                                                                                                                                           | N-Term(iTRAQ4plex), M6(Oxidation)                                                  | 784.34412  | 27 |      | Expt1 |
| SSGWGM              | 1 | 21704096                                                                                                                                                                                                           | N-Term(iTRAQ4plex)                                                                 | 768.35010  | 27 |      | Expt1 |
| GDMMCVNQGGYLCIPR    | 1 | 6753824                                                                                                                                                                                                            | N-Term(iTRAQ4plex), M4(Oxidation), C5(Methylthio), N9(Deamidated), C14(Methylthio) | 2123.86308 | 26 |      | Expt1 |
| TCVDINECQR          | 2 | 168693628                                                                                                                                                                                                          | N-Term(iTRAQ4plex), C2(Methylthio), C8(Methylthio)                                 | 1416.58672 | 26 | 3.24 | Expt1 |
| VPVNLRL             | 1 | 134288917                                                                                                                                                                                                          | N-Term(iTRAQ4plex)                                                                 | 954.62206  | 25 |      | Expt1 |
| EGGSAPV             | 1 | 125660453                                                                                                                                                                                                          | N-Term(iTRAQ4plex)                                                                 | 760.39777  | 25 |      | Expt1 |
| LPIEPR              | 1 | 150456419                                                                                                                                                                                                          | N-Term(iTRAQ4plex)                                                                 | 868.53520  | 25 |      | Expt1 |
| ISLLR               | 3 | 149258822;27370240;27370092;11230784;51036613                                                                                                                                                                      | N-Term(iTRAQ4plex)                                                                 | 858.58965  | 25 |      | Expt1 |
| AQEDL               | 2 | 112293264                                                                                                                                                                                                          | N-Term(iTRAQ4plex)                                                                 | 719.37134  | 25 |      | Expt1 |
| LITPVR              | 1 | 31712008                                                                                                                                                                                                           | N-Term(iTRAQ4plex)                                                                 | 842.55693  | 24 |      | Expt1 |
| VGEEECSR            | 1 | 29336026                                                                                                                                                                                                           | N-Term(iTRAQ4plex), C7(Methylthio)                                                 | 1227.51201 | 24 |      | Expt1 |
| DNVEGFNCER          | 2 | 153791270                                                                                                                                                                                                          | N-Term(iTRAQ4plex), C8(Methylthio)                                                 | 1372.57305 | 24 | 2.93 | Expt1 |
| GLVVI               | 3 | 149270015                                                                                                                                                                                                          | N-Term(iTRAQ4plex)                                                                 | 644.44586  | 24 |      | Expt1 |
| IIILR               | 8 | 22122825;149259510;149265267;149265372;94402646;944006016;149270489;170763522;117938280;153791278;85701452;114155137;125490365;148276994;6680806;41053864;21312986;158937319;27370506;124487348;75677412;153792273 | N-Term(iTRAQ4plex)                                                                 | 771.56224  | 24 |      | Expt1 |
| TGITLR              | 1 | 169234958;32129201                                                                                                                                                                                                 | N-Term(iTRAQ4plex)                                                                 | 917.59111  | 24 |      | Expt1 |
| DINECTPGICMNGR      | 1 | 118197277                                                                                                                                                                                                          | N-Term(iTRAQ4plex), C5(Methylthio), C11(Methylthio), N13(Deamidated)               | 1888.74932 | 23 |      | Expt1 |
| LQLAL               | 3 | 153281234                                                                                                                                                                                                          | N-Term(iTRAQ4plex)                                                                 | 701.46844  | 22 |      | Expt1 |
| GGYWYNCCTDSNLNGVYYR | 1 | 88196773                                                                                                                                                                                                           | N-Term(iTRAQ4plex), C7(Methylthio), C8(Methylthio), N14(Deamidated)                | 2484.97856 | 21 |      | Expt1 |
| IPVVVR              | 2 | 46849708                                                                                                                                                                                                           | N-Term(iTRAQ4plex)                                                                 | 826.56578  | 21 |      | Expt1 |
| CVAFE               | 1 | 6678682                                                                                                                                                                                                            | N-Term(iTRAQ4plex), C1(Methylthio)                                                 | 758.33368  | 18 |      | Expt1 |
| EGPDF               | 3 | 33563266                                                                                                                                                                                                           | N-Term(iTRAQ4plex)                                                                 | 708.33496  | 17 |      | Expt1 |
| FCEDNFNCDDR         | 1 | 45504394                                                                                                                                                                                                           | N-Term(iTRAQ4plex), C2(Methylthio), C4(Methylthio), C9(Methylthio)                 | 1647.53154 | 17 |      | Expt1 |
| AMNAF               | 3 | 21105853                                                                                                                                                                                                           | N-Term(iTRAQ4plex), M2(Oxidation)                                                  | 713.34613  | 16 |      | Expt1 |
| IATII               | 5 | 165932331                                                                                                                                                                                                          | N-Term(iTRAQ4plex)                                                                 | 674.45923  | 16 |      | Expt1 |

|                            |     |                                                                                                                         |                                                                                       |            |    |      |      |  |       |
|----------------------------|-----|-------------------------------------------------------------------------------------------------------------------------|---------------------------------------------------------------------------------------|------------|----|------|------|--|-------|
| ATAESASECLPCDCNGR          | 1   | 153791270                                                                                                               | N-Term(iTRAQ4plex), C9(Methylthio), C12(Methylthio), C14(Methylthio), N15(Deamidated) | 2009.73209 | 16 |      |      |  | Expt1 |
| TLQALQIPAAK                | 4   | 242332572                                                                                                               | N-Term(iTRAQ4plex), K11(iTRAQ4plex)                                                   | 1441.90190 |    | 1.82 | 4.72 |  | Expt1 |
| IVEANPLLEAFGNAK            | 4   | 261823961                                                                                                               | N-Term(iTRAQ4plex), K15(iTRAQ4plex)                                                   | 1874.07163 |    | 1.68 | 3.99 |  | Expt1 |
| VPAQQLQEAGILSQEELQR        | 11  | 256000745;256418964;254675117;254675195;254675201;254675251;254675253;254675259;254675119;254675244;254675265;254675115 | N-Term(iTRAQ4plex)                                                                    | 2281.23557 |    | 1.65 | 7.27 |  | Expt1 |
| YMPNLALPEDVSAIQK           | 1   | 254692936                                                                                                               | N-Term(iTRAQ4plex), M2(Oxidation), Q15(Deamidated), K16(iTRAQ4plex)                   | 2094.08219 |    | 1.33 |      |  | Expt1 |
| SLNLDSIAEVK                | 164 | 269914154                                                                                                               | N-Term(iTRAQ4plex), N3(Deamidated), K12(iTRAQ4plex)                                   | 1590.92314 |    | 1.21 | 5.80 |  | Expt1 |
| LEGSEVQLVEYEAAGLIR         | 3   | 244791124                                                                                                               | N-Term(iTRAQ4plex)                                                                    | 2278.21451 |    | 1.19 | 6.28 |  | Expt1 |
| FQPGETLLEITPATNEQEAHQK     | 4   | 242332572                                                                                                               | N-Term(iTRAQ4plex)                                                                    | 3012.46891 |    |      | 7.14 |  | Expt1 |
| SQVMDEATALQLQEGSLTSEEVTK   | 2   | 256000745;256418964;254675117;254675195;254675201;254675251;254675253;254675259;254675119;254675244;254675265;254675115 | N-Term(iTRAQ4plex), K24(iTRAQ4plex)                                                   | 2908.51504 |    |      | 7.02 |  | Expt1 |
| TIAECLADELINAAK            | 13  | 254675270                                                                                                               | N-Term(iTRAQ4plex), C5(Methylthio), K15(iTRAQ4plex)                                   | 1909.00542 |    |      | 6.97 |  | Expt1 |
| ALVPAEALLDSGVISHELYQQLQR   | 2   | 256000745;256418964;254675117;254675195;254675201;254675251;254675253;254675259;254675119;254675244;254675265;254675115 | N-Term(iTRAQ4plex)                                                                    | 2794.53312 |    |      | 6.95 |  | Expt1 |
| EEVQAGVDAANSAQQYQR         | 7   | 242332572                                                                                                               | N-Term(iTRAQ4plex)                                                                    | 2179.04862 |    |      | 6.82 |  | Expt1 |
| SAPSLEYCAELGLDQDDLK        | 2   | 261823961                                                                                                               | N-Term(iTRAQ4plex), C8(Methylthio)                                                    | 2398.14457 |    |      | 6.79 |  | Expt1 |
| VIPATDLSEQISTAGTEASGTGNMK  | 1   | 268836255                                                                                                               | N-Term(iTRAQ4plex), K25(iTRAQ4plex)                                                   | 2766.41233 |    |      | 6.44 |  | Expt1 |
| GFFDPNTEENLTYLQLMER        | 3   | 256000745;256418964;254675117;254675195;254675201;254675251;254675253;254675259;254675119;254675244;254675265;254675115 | N-Term(iTRAQ4plex)                                                                    | 2461.19419 |    |      | 6.41 |  | Expt1 |
| LYGSGGPPPTGEEDTSEKDEL      | 3   | 254540166                                                                                                               | N-Term(iTRAQ4plex), K18(iTRAQ4plex)                                                   | 2466.18436 |    |      | 6.40 |  | Expt1 |
| TQLASWSDPTEETGPVAGILDTELEK | 3   | 256000745;256418964;254675117;254675195;254675201;254675251;254675253;254675259;254675119;254675244;254675265;254675115 | N-Term(iTRAQ4plex), K27(iTRAQ4plex)                                                   | 3176.61618 |    |      | 6.37 |  | Expt1 |
| VIVVGNPANTNCLTASK          | 10  | 254540027                                                                                                               | N-Term(iTRAQ4plex), C12(Methylthio), K17(iTRAQ4plex)                                  | 2035.09751 |    |      | 6.22 |  | Expt1 |
| GVLLIEDLQANQFK             | 3   | 242332572                                                                                                               | N-Term(iTRAQ4plex), K15(iTRAQ4plex)                                                   | 2005.12809 |    |      | 6.15 |  | Expt1 |
| DAPDGSPVEAEPEYTFEGLR       | 12  | 256000745;256418964;254675117;254675195;254675201;254675251;254675253;254675259;254675119;254675244;254675265;254675115 | N-Term(iTRAQ4plex)                                                                    | 2323.08916 |    |      | 6.12 |  | Expt1 |
| SQVGPEDPQSQVGPQAASK        | 1   | 258679484                                                                                                               | N-Term(iTRAQ4plex), K20(iTRAQ4plex)                                                   | 2327.17673 |    |      | 5.86 |  | Expt1 |
| LTQSTFTLEQLGQFK            | 9   | 247300693                                                                                                               | N-Term(iTRAQ4plex), K16(iTRAQ4plex)                                                   | 2126.18167 |    |      | 5.85 |  | Expt1 |
| DPYSGQSVSLFQALK            | 3   | 256000745;256418964;254675117;254675195;254675201;254675251;254675253;254675259;254675119;254675244;254675265;254675115 | N-Term(iTRAQ4plex), K15(iTRAQ4plex)                                                   | 1928.04544 |    |      | 5.77 |  | Expt1 |
| SQIFSTASDNQPTVIK           | 6   | 254540166                                                                                                               | N-Term(iTRAQ4plex), K17(iTRAQ4plex)                                                   | 2125.14438 |    |      | 5.77 |  | Expt1 |
| YLYGTGAVAGVYLPGRS          | 5   | 256000745;256418964;254675117;254675195;254675201;254675251;254675253;254675259;254675119;254675244;254675265;254675115 | N-Term(iTRAQ4plex)                                                                    | 1888.01396 |    |      | 5.77 |  | Expt1 |
| LGNDFMGITLASSQAVSNAR       | 4   | 255003777                                                                                                               | N-Term(iTRAQ4plex)                                                                    | 2196.12174 |    |      | 5.72 |  | Expt1 |

|                              |    |                                                                                                                         |                                                      |            |  |  |  |      |       |
|------------------------------|----|-------------------------------------------------------------------------------------------------------------------------|------------------------------------------------------|------------|--|--|--|------|-------|
| DLLQPEVAVALLEAQAGTGHIDPATSAR | 2  | 256000745;256418964;254675117;254675195;254675201;254675251;254675253;254675259;254675119;254675244;254675265;254675115 | N-Term(iTRAQ4plex)                                   | 3100.67502 |  |  |  | 5.69 | Expt1 |
| VQSGSESVIQEYVDLR             | 6  | 256000745;256418964;254675117;254675195;254675201;254675251;254675253;254675259;254675119;254675244;254675265;254675115 | N-Term(iTRAQ4plex)                                   | 1953.00420 |  |  |  | 5.64 | Expt1 |
| QLSSSVTGLTNIEENCQR           | 5  | 242332572                                                                                                               | N-Term(iTRAQ4plex), C17(Methylthio)                  | 2298.08768 |  |  |  | 5.63 | Expt1 |
| SANAEDAQEFSDVER              | 8  | 254587904                                                                                                               | N-Term(iTRAQ4plex)                                   | 1811.81853 |  |  |  | 5.63 | Expt1 |
| LGYAGNTEPQFIIPSCIAIK         | 1  | 23956222                                                                                                                | N-Term(iTRAQ4plex), C16(Methylthio), K20(iTRAQ4plex) | 2469.32334 |  |  |  | 5.60 | Expt1 |
| IAQNESELISDEAQQDMALR         | 1  | 261823961                                                                                                               | N-Term(iTRAQ4plex)                                   | 2334.14334 |  |  |  | 5.59 | Expt1 |
| QTNLENLDQAFSVAER             | 3  | 256000745;256418964;254675117;254675195;254675201;254675251;254675253;254675259;254675119;254675244;254675265;254675115 | N-Term(iTRAQ4plex)                                   | 1978.99619 |  |  |  | 5.56 | Expt1 |
| FALGISAINEAVDSGDVGR          | 11 | 242332572                                                                                                               | N-Term(iTRAQ4plex)                                   | 2035.05986 |  |  |  | 5.56 | Expt1 |
| LLDAQSTGGIVDPSK              | 3  | 256000745;256418964;254675117;254675195;254675201;254675251;254675253;254675259;254675119;254675244;254675265;254675115 | N-Term(iTRAQ4plex), K16(iTRAQ4plex)                  | 1902.08237 |  |  |  | 5.39 | Expt1 |
| VIYQLEGAVQAGQLK              | 4  | 256000745;256418964;254675117;254675195;254675201;254675251;254675253;254675259;254675119;254675244;254675265;254675115 | N-Term(iTRAQ4plex), K16(iTRAQ4plex)                  | 1992.14188 |  |  |  | 5.37 | Expt1 |
| SVTDYDFAPFLNNSPQQNPAAQLPAR   | 4  | 261823961                                                                                                               | N-Term(iTRAQ4plex)                                   | 3005.49515 |  |  |  | 5.36 | Expt1 |
| EIQSSISGVTAAYNR              | 4  | 242332572                                                                                                               | N-Term(iTRAQ4plex)                                   | 1868.94841 |  |  |  | 5.29 | Expt1 |
| AAYPDLENPLLIVTSPQQPK         | 1  | 262118273                                                                                                               | N-Term(iTRAQ4plex), K20(iTRAQ4plex)                  | 2466.34769 |  |  |  | 5.28 | Expt1 |
| YSELTTLSQYIK                 | 4  | 256000745;256418964;254675117;254675195;254675201;254675251;254675253;254675259;254675119;254675244;254675265;254675115 | N-Term(iTRAQ4plex), K13(iTRAQ4plex)                  | 1835.01102 |  |  |  | 5.28 | Expt1 |
| TQNPMVTGTSVLGVK              | 6  | 254540082                                                                                                               | N-Term(iTRAQ4plex), K15(iTRAQ4plex)                  | 1820.01885 |  |  |  | 5.25 | Expt1 |
| AQAEAQQPVFNTRLR              | 2  | 256000745;256418964;254675117;254675195;254675201;254675251;254675253;254675259;254675119;254675244;254675265;254675115 | N-Term(iTRAQ4plex)                                   | 1716.91509 |  |  |  | 5.21 | Expt1 |
| ASSFVLALEPELSR               | 6  | 282398108                                                                                                               | N-Term(iTRAQ4plex)                                   | 1791.96623 |  |  |  | 5.18 | Expt1 |
| STSVVEQGGIQTVDQLIK           | 1  | 258547154;258547156;258547152                                                                                           | N-Term(iTRAQ4plex), K18(iTRAQ4plex)                  | 2190.22611 |  |  |  | 5.15 | Expt1 |
| GLFDEEMNEILTPSDDTK           | 3  | 256000745;256418964;254675117;254675195;254675201;254675251;254675253;254675259;254675119;254675244;254675265;254675115 | N-Term(iTRAQ4plex), K19(iTRAQ4plex)                  | 2457.16458 |  |  |  | 5.14 | Expt1 |
| TMQGEVSVVLK                  | 2  | 258547154;258547156;258547152                                                                                           | N-Term(iTRAQ4plex), K12(iTRAQ4plex)                  | 1565.88298 |  |  |  | 5.13 | Expt1 |
| AGVGAPVQVTLQSTQR             | 8  | 256000745;256418964;254675117;254675195;254675201;254675251;254675253;254675259;254675119;254675244;254675265;254675115 | N-Term(iTRAQ4plex)                                   | 1857.03545 |  |  |  | 5.13 | Expt1 |
| ALGGASGGYTTGPEPLVLLR         | 3  | 240120117;240120119                                                                                                     | N-Term(iTRAQ4plex)                                   | 2160.18169 |  |  |  | 5.13 | Expt1 |
| LLDEEATDNDLR                 | 3  | 258547154;258547156;258547152                                                                                           | N-Term(iTRAQ4plex)                                   | 1676.81304 |  |  |  | 5.13 | Expt1 |

|                                 |   |                                                                                                                         |                                                                      |            |  |  |  |      |       |
|---------------------------------|---|-------------------------------------------------------------------------------------------------------------------------|----------------------------------------------------------------------|------------|--|--|--|------|-------|
| GPEGPQPPGHVPPGDECEILDIMK        | 1 | 6753484                                                                                                                 | N-Term(iTRAQ4plex), C20(Methylthio), M27(Oxidation), K28(iTRAQ4plex) | 3186.55881 |  |  |  | 5.12 | Expt1 |
| FIQQTYPSSGEEQAQYCR              | 6 | 258547154;258547156;258547152                                                                                           | N-Term(iTRAQ4plex), C17(Methylthio)                                  | 2295.03458 |  |  |  | 5.12 | Expt1 |
| NQLTSPENTVFDK                   | 3 | 254540166                                                                                                               | N-Term(iTRAQ4plex), K15(iTRAQ4plex)                                  | 1966.01474 |  |  |  | 5.07 | Expt1 |
| GGTGSVSGAGLEPVAR                | 3 | 242332585;242332587                                                                                                     | N-Term(iTRAQ4plex)                                                   | 1558.83245 |  |  |  | 5.05 | Expt1 |
| MVPVSVQQSLAVFSQR                | 3 | 258547154;258547156;258547152                                                                                           | N-Term(iTRAQ4plex), M1(Oxidation)                                    | 1936.04569 |  |  |  | 5.05 | Expt1 |
| VNDSTMLGASGDYADFQYLK            | 1 | 254540082                                                                                                               | N-Term(iTRAQ4plex), M6(Oxidation), K20(iTRAQ4plex)                   | 2499.20157 |  |  |  | 5.04 | Expt1 |
| AYTEEDLDLVEK                    | 1 | 261878543                                                                                                               | N-Term(iTRAQ4plex), K12(iTRAQ4plex)                                  | 1712.88591 |  |  |  | 5.03 | Expt1 |
| DDPSGQMLLLSDAR                  | 4 | 256000745;256418964;254675117;254675195;254675201;254675251;254675253;254675259;254675119;254675244;254675265;254675115 | N-Term(iTRAQ4plex)                                                   | 1774.91814 |  |  |  | 4.98 | Expt1 |
| VLTSSEEEYLLSDK                  | 1 | 241982745                                                                                                               | N-Term(iTRAQ4plex), K14(iTRAQ4plex)                                  | 1900.99736 |  |  |  | 4.96 | Expt1 |
| TGPTTEEVSSGPMVLR                | 4 | 269914118                                                                                                               | N-Term(iTRAQ4plex)                                                   | 1832.92143 |  |  |  | 4.96 | Expt1 |
| TFAPEEISAMVLTG                  | 6 | 254540166                                                                                                               | N-Term(iTRAQ4plex), K14(iTRAQ4plex)                                  | 1825.01236 |  |  |  | 4.93 | Expt1 |
| LLDAQLATGGIVDPR                 | 5 | 256000745;256418964;254675117;254675195;254675201;254675251;254675253;254675259;254675119;254675244;254675265;254675115 | N-Term(iTRAQ4plex)                                                   | 1682.95749 |  |  |  | 4.92 | Expt1 |
| YSVVSEQLPAAASTYR                | 3 | 242332585;242332587                                                                                                     | N-Term(iTRAQ4plex)                                                   | 2015.02422 |  |  |  | 4.92 | Expt1 |
| APSFVSAPQVSIPTDNNLTK            | 3 | 61743961                                                                                                                | N-Term(iTRAQ4plex), K21(iTRAQ4plex)                                  | 2457.36911 |  |  |  | 4.91 | Expt1 |
| EVYENYPAYDLTER                  | 5 | 253795498                                                                                                               | N-Term(iTRAQ4plex)                                                   | 1905.89690 |  |  |  | 4.88 | Expt1 |
| SIITYVSSLYDAMPR                 | 3 | 256000745;256418964;254675117;254675195;254675201;254675251;254675253;254675259;254675119;254675244;254675265;254675115 | N-Term(iTRAQ4plex)                                                   | 1859.97361 |  |  |  | 4.86 | Expt1 |
| MVPVSVQQSLAVFSQR                | 4 | 258547154;258547156;258547152                                                                                           | N-Term(iTRAQ4plex)                                                   | 1920.05234 |  |  |  | 4.85 | Expt1 |
| SEEMQTVQQEQILQETQALQK           | 1 | 256000745;256418964;254675117;254675195;254675201;254675251;254675253;254675259;254675119;254675244;254675265;254675115 | N-Term(iTRAQ4plex), K21(iTRAQ4plex)                                  | 2777.43637 |  |  |  | 4.84 | Expt1 |
| NELESYAYSLK                     | 4 | 254540166                                                                                                               | N-Term(iTRAQ4plex), K11(iTRAQ4plex)                                  | 1604.84978 |  |  |  | 4.83 | Expt1 |
| DSQDAGGFGPEDR                   | 4 | 256000745;256418964;254675117;254675195;254675201;254675251;254675253;254675259;254675119;254675244;254675265;254675115 | N-Term(iTRAQ4plex)                                                   | 1494.65959 |  |  |  | 4.82 | Expt1 |
| EEELQQLQEQNMLDR                 | 5 | 256000745;256418964;254675117;254675195;254675201;254675251;254675253;254675259;254675119;254675244;254675265;254675115 | N-Term(iTRAQ4plex)                                                   | 2276.09873 |  |  |  | 4.82 | Expt1 |
| TAQIIVNNEHPQOETPAEASSGATTGTVAAR | 1 | 164607147                                                                                                               | N-Term(iTRAQ4plex)                                                   | 3364.68198 |  |  |  | 4.81 | Expt1 |
| LFVGNLPPDITEEMR                 | 4 | 255958247                                                                                                               | N-Term(iTRAQ4plex)                                                   | 2004.01970 |  |  |  | 4.80 | Expt1 |
| GTNVIAGVWLEEAGQK                | 6 | 256000745;256418964;254675117;254675195;254675201;254675251;254675253;254675259;254675119;254675244;254675265;254675115 | N-Term(iTRAQ4plex), K16(iTRAQ4plex)                                  | 1960.07535 |  |  |  | 4.77 | Expt1 |
| FAQPGSFYEYAMR                   | 8 | 255958247                                                                                                               | N-Term(iTRAQ4plex)                                                   | 1839.85141 |  |  |  | 4.74 | Expt1 |
| GIVGVENVVLEK                    | 3 | 268836255                                                                                                               | N-Term(iTRAQ4plex), K12(iTRAQ4plex)                                  | 1515.89726 |  |  |  | 4.74 | Expt1 |
| NASTFEEVQVPSAYQK                | 2 | 75677414                                                                                                                | N-Term(iTRAQ4plex), K17(iTRAQ4plex)                                  | 2185.14804 |  |  |  | 4.71 | Expt1 |



|                               |    |                                                                                                                         |                                                      |            |  |  |  |      |       |
|-------------------------------|----|-------------------------------------------------------------------------------------------------------------------------|------------------------------------------------------|------------|--|--|--|------|-------|
| APVPASELLDAK                  | 2  | 256000745;256418964;254675117;254675195;254675201;254675251;254675253;254675259;254675119;254675244;254675265;254675115 | N-Term(iTRAQ4plex), K12(iTRAQ4plex)                  | 1498.87383 |  |  |  | 4.70 | Expt1 |
| SDQLTGLSLLPLSEK               | 6  | 256000745;256418964;254675117;254675195;254675201;254675251;254675253;254675259;254675119;254675244;254675265;254675115 | N-Term(iTRAQ4plex), K15(iTRAQ4plex)                  | 1889.08921 |  |  |  | 4.66 | Expt1 |
| EGWQVEEADDWLR                 | 2  | 268836255                                                                                                               | N-Term(iTRAQ4plex)                                   | 1776.83696 |  |  |  | 4.63 | Expt1 |
| LQEQQLDLEELQK                 | 1  | 254675300                                                                                                               | N-Term(iTRAQ4plex), K13(iTRAQ4plex)                  | 1902.05326 |  |  |  | 4.63 | Expt1 |
| DLYANTVLSGGTMMYPGIADR         | 1  | 6671509;6752954                                                                                                         | N-Term(iTRAQ4plex), Y15(iTRAQ4plex)                  | 2503.27127 |  |  |  | 4.62 | Expt1 |
| DYELQLITYK                    | 2  | 256000745;256418964;254675117;254675195;254675201;254675251;254675253;254675259;254675119;254675244;254675265;254675115 | N-Term(iTRAQ4plex), K10(iTRAQ4plex)                  | 1573.87541 |  |  |  | 4.61 | Expt1 |
| ASAELALGENNEVLK               | 2  | 6754036                                                                                                                 | N-Term(iTRAQ4plex), K15(iTRAQ4plex)                  | 1846.02298 |  |  |  | 4.61 | Expt1 |
| DPYTEQTISLFQAMK               | 3  | 256000745;256418964;254675117;254675195;254675201;254675251;254675253;254675259;254675119;254675244;254675265;254675115 | N-Term(iTRAQ4plex), K15(iTRAQ4plex)                  | 2060.06668 |  |  |  | 4.60 | Expt1 |
| YVVVTGITPTPLGEGK              | 2  | 261878543                                                                                                               | N-Term(iTRAQ4plex), K16(iTRAQ4plex)                  | 1919.10880 |  |  |  | 4.60 | Expt1 |
| SLQEQAADAEER                  | 2  | 256000790;256000792;256000796;256000788                                                                                 | N-Term(iTRAQ4plex)                                   | 1490.72234 |  |  |  | 4.58 | Expt1 |
| SAAPSTLDSSTAPAQLGK            | 1  | 6678137                                                                                                                 | N-Term(iTRAQ4plex), K19(iTRAQ4plex)                  | 2077.10648 |  |  |  | 4.57 | Expt1 |
| VCIVSGNWSAVAK                 | 1  | 257467604                                                                                                               | N-Term(iTRAQ4plex), C2(Methylthio), K15(iTRAQ4plex)  | 1781.93291 |  |  |  | 4.56 | Expt1 |
| ELPLTADALFAEVSK               | 2  | 242332585;242332587                                                                                                     | N-Term(iTRAQ4plex), K16(iTRAQ4plex)                  | 1993.11003 |  |  |  | 4.56 | Expt1 |
| AGGAGVPAFYTGTLVQEGGSPK        | 1  | 18266680                                                                                                                | N-Term(iTRAQ4plex), K27(iTRAQ4plex)                  | 2873.49405 |  |  |  | 4.55 | Expt1 |
| LQAALDNEAGRPAMEPGNSLDLGGDAAGR | 2  | 160333923                                                                                                               | N-Term(iTRAQ4plex), N19(Deamidated)                  | 3125.52207 |  |  |  | 4.54 | Expt1 |
| YLTESYGTGQDIDDR               | 4  | 261823961                                                                                                               | N-Term(iTRAQ4plex)                                   | 1876.86919 |  |  |  | 4.53 | Expt1 |
| FLASEGAPDFLCPEELEHVS          | 2  | 269914118                                                                                                               | N-Term(iTRAQ4plex), C12(Methylthio)                  | 2536.20847 |  |  |  | 4.53 | Expt1 |
| ITPSYVAFTPEGER                | 14 | 254540166                                                                                                               | N-Term(iTRAQ4plex)                                   | 1710.88371 |  |  |  | 4.52 | Expt1 |
| VAEGIFETEAPGGYK               | 1  | 255003777                                                                                                               | N-Term(iTRAQ4plex), K15(iTRAQ4plex)                  | 1855.97063 |  |  |  | 4.51 | Expt1 |
| LQGPQTSAEVYR                  | 2  | 257467604                                                                                                               | N-Term(iTRAQ4plex)                                   | 1492.78752 |  |  |  | 4.51 | Expt1 |
| FIHAPPGEFNEVFNDR              | 1  | 6671672                                                                                                                 | N-Term(iTRAQ4plex)                                   | 2245.15427 |  |  |  | 4.50 | Expt1 |
| SPDVGLYGVPECGETYQSDLAEK       | 3  | 242332572                                                                                                               | N-Term(iTRAQ4plex), C13(Methylthio), K25(iTRAQ4plex) | 2975.43252 |  |  |  | 4.50 | Expt1 |
| INEANQLMQYDQCLTK              | 1  | 269784707;269784709                                                                                                     | N-Term(iTRAQ4plex), C13(Methylthio), K16(iTRAQ4plex) | 2246.09983 |  |  |  | 4.49 | Expt1 |
| LQNQVIALDYLR                  | 4  | 256418964;254675117;254675195;254675201;254675251;254675253;254675259;254675119;254675244;254675265;254675115           | N-Term(iTRAQ4plex)                                   | 1589.91838 |  |  |  | 4.49 | Expt1 |
| DLDVAVLVGSMR                  | 9  | 254540027                                                                                                               | N-Term(iTRAQ4plex)                                   | 1515.83965 |  |  |  | 4.49 | Expt1 |
| VDQIQEIVTGNPTVIK              | 3  | 242332572                                                                                                               | N-Term(iTRAQ4plex), K16(iTRAQ4plex)                  | 2042.17380 |  |  |  | 4.48 | Expt1 |
| GEDEEDNNLEVR                  | 1  | 282398108                                                                                                               | N-Term(iTRAQ4plex)                                   | 1562.70391 |  |  |  | 4.48 | Expt1 |
| DIWNMEPSDLK                   | 2  | 268836255                                                                                                               | N-Term(iTRAQ4plex), K11(iTRAQ4plex)                  | 1635.83013 |  |  |  | 4.46 | Expt1 |
| AGTQELDDQIQANLPDEK            | 1  | 160333229                                                                                                               | N-Term(iTRAQ4plex), K18(iTRAQ4plex)                  | 2273.15293 |  |  |  | 4.45 | Expt1 |
| EQTVSETLGPSSGEAVR             | 3  | 269914118                                                                                                               | N-Term(iTRAQ4plex)                                   | 1803.92046 |  |  |  | 4.45 | Expt1 |
| IVENSEAVTEILNNAELLK           | 1  | 134053913                                                                                                               | N-Term(iTRAQ4plex), K19(iTRAQ4plex)                  | 2387.33567 |  |  |  | 4.44 | Expt1 |
| AQAELEAQELQR                  | 8  | 256000745;256418964;254675117;254675195;254675201;254675251;254675253;254675259;254675119;254675244;254675265;254675115 | N-Term(iTRAQ4plex)                                   | 1529.80240 |  |  |  | 4.43 | Expt1 |
| LTEQSNTPLLLPLSAR              | 1  | 258645102                                                                                                               | N-Term(iTRAQ4plex)                                   | 1897.09184 |  |  |  | 4.40 | Expt1 |
| AAGMLSQDLDFSR                 | 1  | 255982594                                                                                                               | N-Term(iTRAQ4plex)                                   | 1552.83281 |  |  |  | 4.39 | Expt1 |

|                             |    |                                                                                                                         |                                                                                      |            |  |  |  |      |       |
|-----------------------------|----|-------------------------------------------------------------------------------------------------------------------------|--------------------------------------------------------------------------------------|------------|--|--|--|------|-------|
| FLEVQYL TGG LIEPDT PGR      | 2  | 256000745;256418964;254675117;254675195;254675201;254675251;254675253;254675259;254675119;254675244;254675265;254675115 | N-Term(iTRAQ4plex)                                                                   | 2249.20237 |  |  |  | 4.38 | Expt1 |
| AGGLDWPEATEGPPSR            | 4  | 242332585;242332587                                                                                                     | N-Term(iTRAQ4plex)                                                                   | 1783.87505 |  |  |  | 4.38 | Expt1 |
| ASLQNLLSASQAR               | 2  | 240120112                                                                                                               | N-Term(iTRAQ4plex)                                                                   | 1502.84514 |  |  |  | 4.37 | Expt1 |
| SDGGYTYDTSDLAAIK            | 1  | 262118273                                                                                                               | N-Term(iTRAQ4plex), K16(iTRAQ4plex)                                                  | 1964.97745 |  |  |  | 4.37 | Expt1 |
| LVGILDILDEENR               | 2  | 261823961                                                                                                               | N-Term(iTRAQ4plex)                                                                   | 1642.91631 |  |  |  | 4.37 | Expt1 |
| NVIFEIGPTEEVGDFEVK          | 3  | 242332572                                                                                                               | N-Term(iTRAQ4plex), K18(iTRAQ4plex)                                                  | 2310.22080 |  |  |  | 4.36 | Expt1 |
| LTAEDLYEAR                  | 5  | 256000745;256418964;254675117;254675195;254675201;254675251;254675253;254675259;254675119;254675244;254675265;254675115 | N-Term(iTRAQ4plex)                                                                   | 1324.68962 |  |  |  | 4.36 | Expt1 |
| SGLGELILPENEPGSSIMP GK      | 1  | 226823367                                                                                                               | N-Term(iTRAQ4plex), K21(iTRAQ4plex)                                                  | 2413.29416 |  |  |  | 4.35 | Expt1 |
| GPQPNYESPYPGAPTFGSQPPQPLPPK | 2  | 269954698;269954700                                                                                                     | N-Term(iTRAQ4plex), K29(iTRAQ4plex)                                                  | 3290.66599 |  |  |  | 4.35 | Expt1 |
| DLDAVLVGSMPR                | 8  | 254540027                                                                                                               | N-Term(iTRAQ4plex), M11(Oxidation)                                                   | 1531.82792 |  |  |  | 4.34 | Expt1 |
| TDPTTLTDEINR                | 2  | 261878543                                                                                                               | N-Term(iTRAQ4plex)                                                                   | 1634.79888 |  |  |  | 4.31 | Expt1 |
| LISLFQAMK                   | 1  | 256000745;256418964;254675117;254675195;254675201;254675251;254675253;254675259;254675119;254675244;254675265;254675115 | N-Term(iTRAQ4plex), K9(iTRAQ4plex)                                                   | 1338.81316 |  |  |  | 4.30 | Expt1 |
| QAAFEPEGESLGTLSADR          | 1  | 255683297                                                                                                               | N-Term(iTRAQ4plex)                                                                   | 2079.01316 |  |  |  | 4.30 | Expt1 |
| ILFENPDPSDGFVLIPDLK         | 1  | 21312256                                                                                                                | N-Term(iTRAQ4plex), K19(iTRAQ4plex)                                                  | 2403.31235 |  |  |  | 4.29 | Expt1 |
| ILFAQSEPLVPSAGALAR          | 3  | 269914118                                                                                                               | N-Term(iTRAQ4plex)                                                                   | 1984.13860 |  |  |  | 4.29 | Expt1 |
| TLINAEDPPMIVVR              | 10 | 242332572                                                                                                               | N-Term(iTRAQ4plex)                                                                   | 1711.95708 |  |  |  | 4.28 | Expt1 |
| SQVEELFSVR                  | 3  | 256000745;256418964;254675117;254675195;254675201;254675251;254675253;254675259;254675119;254675244;254675265;254675115 | N-Term(iTRAQ4plex)                                                                   | 1466.76409 |  |  |  | 4.27 | Expt1 |
| LFQ TALQEEIK                | 3  | 242332572                                                                                                               | N-Term(iTRAQ4plex), K11(iTRAQ4plex)                                                  | 1607.92522 |  |  |  | 4.26 | Expt1 |
| VQEVEVPEDFGPVR              | 1  | 244790233;244790299                                                                                                     | N-Term(iTRAQ4plex)                                                                   | 1743.90679 |  |  |  | 4.25 | Expt1 |
| IYGADDIELLPEAQNK            | 1  | 261878543                                                                                                               | N-Term(iTRAQ4plex), K16(iTRAQ4plex)                                                  | 2077.11016 |  |  |  | 4.23 | Expt1 |
| LALVEENGIFELLR              | 4  | 242332585;242332587                                                                                                     | N-Term(iTRAQ4plex), N7(Deamidated)                                                   | 1760.99651 |  |  |  | 4.23 | Expt1 |
| ELQQA V LQMEQR              | 3  | 254750698                                                                                                               | N-Term(iTRAQ4plex)                                                                   | 1616.85661 |  |  |  | 4.21 | Expt1 |
| AQDGSSPLSLQDLIEK            | 1  | 244791271                                                                                                               | N-Term(iTRAQ4plex), K16(iTRAQ4plex)                                                  | 1989.07523 |  |  |  | 4.21 | Expt1 |
| LSSGFDDIDLPSAVK             | 2  | 242332585;242332587                                                                                                     | N-Term(iTRAQ4plex), K15(iTRAQ4plex)                                                  | 1852.00090 |  |  |  | 4.20 | Expt1 |
| EQLWLANEGLITK               | 2  | 242332572                                                                                                               | N-Term(iTRAQ4plex), K13(iTRAQ4plex)                                                  | 1803.03733 |  |  |  | 4.20 | Expt1 |
| FVEGLPINDFSR                | 16 | 254540027                                                                                                               | N-Term(iTRAQ4plex), N8(Deamidated)                                                   | 1538.80193 |  |  |  | 4.20 | Expt1 |
| VNDSTMLGASGDYADFQYLK        | 1  | 254540082                                                                                                               | N-Term(iTRAQ4plex), K20(iTRAQ4plex)                                                  | 2483.20713 |  |  |  | 4.19 | Expt1 |
| FSFGSTLVSSADPK              | 1  | 6679891                                                                                                                 | N-Term(iTRAQ4plex), K16(iTRAQ4plex)                                                  | 1904.98899 |  |  |  | 4.19 | Expt1 |
| GLETIASDVVSLASK             | 3  | 257796245                                                                                                               | N-Term(iTRAQ4plex), K15(iTRAQ4plex)                                                  | 1778.02384 |  |  |  | 4.18 | Expt1 |
| IDS DGLVTTEELK              | 1  | 6677691                                                                                                                 | N-Term(iTRAQ4plex), K15(iTRAQ4plex)                                                  | 1879.98062 |  |  |  | 4.18 | Expt1 |
| LAVDALTEGGPEAYNR            | 1  | 269914118                                                                                                               | N-Term(iTRAQ4plex)                                                                   | 1819.93576 |  |  |  | 4.17 | Expt1 |
| AVENSSTAIGIR                | 4  | 261824000                                                                                                               | N-Term(iTRAQ4plex)                                                                   | 1361.75176 |  |  |  | 4.17 | Expt1 |
| EY YEALPELK                 | 2  | 268836255                                                                                                               | N-Term(iTRAQ4plex), K10(iTRAQ4plex)                                                  | 1542.83208 |  |  |  | 4.15 | Expt1 |
| TPQISMSDIDLNVK              | 1  | 61743961                                                                                                                | N-Term(iTRAQ4plex), M6(Oxidation), K14(iTRAQ4plex)                                   | 1864.99857 |  |  |  | 4.15 | Expt1 |
| LGLAPQIQDLYGK               | 1  | 242332572                                                                                                               | N-Term(iTRAQ4plex), K13(iTRAQ4plex)                                                  | 1704.00212 |  |  |  | 4.14 | Expt1 |
| ETMQDLNDR                   | 4  | 254540068                                                                                                               | N-Term(iTRAQ4plex)                                                                   | 1265.59416 |  |  |  | 4.13 | Expt1 |
| MASPAYTLTTAK                | 1  | 254588045;254588047                                                                                                     | N-Term(iTRAQ4plex), K14(iTRAQ4plex)                                                  | 1740.94878 |  |  |  | 4.12 | Expt1 |
| GGCQAQDY TSGMGIVNGAK        | 1  | 160707889                                                                                                               | N-Term(iTRAQ4plex), C3(Methylthio), M12(Oxidation), N16(Deamidated), K19(iTRAQ4plex) | 2207.99283 |  |  |  | 4.12 | Expt1 |
| SSLLDQNLTEEEVNMK            | 1  | 111154082;111154076                                                                                                     | N-Term(iTRAQ4plex), K16(iTRAQ4plex)                                                  | 2138.10001 |  |  |  | 4.12 | Expt1 |
| NPSAMAVESFTATAPFVQIGR       | 1  | 21311891                                                                                                                | N-Term(iTRAQ4plex)                                                                   | 2338.20572 |  |  |  | 4.11 | Expt1 |
| DFAYGEADPLIR                | 3  | 269954711                                                                                                               | N-Term(iTRAQ4plex)                                                                   | 1510.76909 |  |  |  | 4.10 | Expt1 |

|                                |    |                                                                                                                         |                                                                                                      |            |  |  |  |      |       |
|--------------------------------|----|-------------------------------------------------------------------------------------------------------------------------|------------------------------------------------------------------------------------------------------|------------|--|--|--|------|-------|
| NDESQLSPATR                    | 4  | 256000745;256418964;254675117;254675195;254675201;254675251;254675253;254675259;254675119;254675244;254675265;254675115 | N-Term(iTRAQ4plex)                                                                                   | 1361.67851 |  |  |  | 4.10 | Expt1 |
| VLALPEPSAAPTLR                 | 13 | 256000745;256418964;254675117;254675195;254675201;254675251;254675253;254675259;254675119;254675244;254675265;254675115 | N-Term(iTRAQ4plex)                                                                                   | 1675.98943 |  |  |  | 4.10 | Expt1 |
| EVMQMLVELAK                    | 3  | 254553458                                                                                                               | N-Term(iTRAQ4plex), K11(iTRAQ4plex)                                                                  | 1578.89189 |  |  |  | 4.09 | Expt1 |
| SGDAIVDMVPGKPMCVESFSDYPLGR     | 1  | 126032329                                                                                                               | N-Term(iTRAQ4plex), K13(iTRAQ4plex), M15(Oxidation), C16(Methylthio)                                 | 3288.57529 |  |  |  | 4.09 | Expt1 |
| LTTPTYGDLNHLVSATMSGVTTCLR      | 2  | 33859488;31981939;7106439;2165384;21746161;149253488;149253527                                                          | N-Term(iTRAQ4plex), M17(Oxidation), C23(Methylthio)                                                  | 2857.41025 |  |  |  | 4.08 | Expt1 |
| NLNEDTFLPFTR                   | 1  | 239916005                                                                                                               | N-Term(iTRAQ4plex)                                                                                   | 1711.88103 |  |  |  | 4.08 | Expt1 |
| GILAADESTGSIK                  | 2  | 6671539                                                                                                                 | N-Term(iTRAQ4plex), K14(iTRAQ4plex)                                                                  | 1620.90544 |  |  |  | 4.08 | Expt1 |
| QLAEEDLAQQR                    | 5  | 256000745;256418964;254675117;254675195;254675201;254675251;254675253;254675259;254675119;254675244;254675265;254675115 | N-Term(iTRAQ4plex)                                                                                   | 1444.75286 |  |  |  | 4.07 | Expt1 |
| CPNLTYLNLSGNK                  | 1  | 254587996                                                                                                               | N-Term(iTRAQ4plex), C1(Methylthio), K13(iTRAQ4plex)                                                  | 1770.91387 |  |  |  | 4.07 | Expt1 |
| LANIDEAMLQR                    | 1  | 262118273                                                                                                               | N-Term(iTRAQ4plex)                                                                                   | 1417.76018 |  |  |  | 4.07 | Expt1 |
| SDIDEIVLVGGSTR                 | 3  | 254540166                                                                                                               | N-Term(iTRAQ4plex)                                                                                   | 1604.86577 |  |  |  | 4.06 | Expt1 |
| GGELVYTDTEAR                   | 4  | 256000745;256418964;254675117;254675195;254675201;254675251;254675253;254675259;254675119;254675244;254675265;254675115 | N-Term(iTRAQ4plex)                                                                                   | 1454.72734 |  |  |  | 4.06 | Expt1 |
| LLEAQAQTGGIIPSTGER             | 1  | 256000745;256418964;254675117;254675195;254675201;254675251;254675253;254675259;254675119;254675244;254675265;254675115 | N-Term(iTRAQ4plex), C7(Methylthio)                                                                   | 2121.04374 |  |  |  | 4.04 | Expt1 |
| NAEPLINLDVNNPDFK               | 3  | 149251291;13386026                                                                                                      | N-Term(iTRAQ4plex), K16(iTRAQ4plex)                                                                  | 2101.12223 |  |  |  | 4.04 | Expt1 |
| MVQNLEIELQSLAMK                | 2  | 118130981                                                                                                               | M1(Oxidation), N-Term(iTRAQ4plex), Q10(Deamidated), M15(Oxidation), K16(iTRAQ4plex)                  | 2196.15342 |  |  |  | 4.03 | Expt1 |
| LITSVAEVVNDPMVGSK              | 2  | 268836255                                                                                                               | N-Term(iTRAQ4plex), M14(Oxidation), K18(iTRAQ4plex)                                                  | 2177.18460 |  |  |  | 4.03 | Expt1 |
| DLSTVEALQNLK                   | 1  | 254587996                                                                                                               | N-Term(iTRAQ4plex), K12(iTRAQ4plex)                                                                  | 1618.93082 |  |  |  | 4.01 | Expt1 |
| SLYDDIEAGETTLPGDAIHTMIENLQPETK | 1  | 111074529                                                                                                               | N-Term(iTRAQ4plex), M21(Oxidation), K30(iTRAQ4plex)                                                  | 3605.78757 |  |  |  | 4.01 | Expt1 |
| EAILNDEIYCPPETAVLLASYAVQAK     | 1  | 157277952;157277948                                                                                                     | N-Term(iTRAQ4plex), C10(Methylthio), K26(iTRAQ4plex)                                                 | 3155.63486 |  |  |  | 4.01 | Expt1 |
| VNQAIWLLCTGAR                  | 1  | 254675270                                                                                                               | N-Term(iTRAQ4plex), C9(Methylthio)                                                                   | 1634.86601 |  |  |  | 4.00 | Expt1 |
| FMNSGQTCVAPDYILCDPSIQNEIVEK    | 1  | 163310769                                                                                                               | N-Term(iTRAQ4plex), M2(Oxidation), C8(Methylthio), Y13(iTRAQ4plex), C16(Methylthio), K27(iTRAQ4plex) | 3554.68520 |  |  |  | 4.00 | Expt1 |
| NIVAVGAGFCDGLR                 | 8  | 257467604                                                                                                               | N-Term(iTRAQ4plex), C10(Methylthio)                                                                  | 1581.80143 |  |  |  | 3.99 | Expt1 |
| GEVAGQTLSLMEQLR                | 3  | 269954677;269954679                                                                                                     | N-Term(iTRAQ4plex)                                                                                   | 1775.94632 |  |  |  | 3.98 | Expt1 |
| QQNLASYDYVR                    | 2  | 256000745;256418964;254675117;254675195;254675201;254675251;254675253;254675259;254675119;254675244;254675265;254675115 | N-Term(iTRAQ4plex)                                                                                   | 1500.76067 |  |  |  | 3.97 | Expt1 |
| SPALLPSTVEGPPGAPLLQAK          | 1  | 124486923                                                                                                               | N-Term(iTRAQ4plex), K21(iTRAQ4plex)                                                                  | 2331.35611 |  |  |  | 3.97 | Expt1 |
| VAPAPAGVFTDIPISNIR             | 3  | 257796245                                                                                                               | N-Term(iTRAQ4plex)                                                                                   | 1982.11997 |  |  |  | 3.97 | Expt1 |
| NIQVDSPYDISR                   | 4  | 282398108                                                                                                               | N-Term(iTRAQ4plex)                                                                                   | 1550.79729 |  |  |  | 3.96 | Expt1 |
| GGAEGELQALR                    | 3  | 256000745;256418964;254675117;254675195;254675201;254675251;254675253;254675259;254675119;254675244;254675265;254675115 | N-Term(iTRAQ4plex)                                                                                   | 1244.66973 |  |  |  | 3.95 | Expt1 |

|                                  |   |                                                                                                                         |                                                                      |            |  |  |  |      |       |
|----------------------------------|---|-------------------------------------------------------------------------------------------------------------------------|----------------------------------------------------------------------|------------|--|--|--|------|-------|
| EVLEMESAWR                       | 3 | 256000745;256418964;254675117;254675195;254675201;254675251;254675253;254675259;254675119;254675244;254675265;254675115 | N-Term(iTRAQ4plex)                                                   | 1393.69292 |  |  |  | 3.94 | Expt1 |
| FIIGSQAGEQPTQTVMPPQVMR           | 2 | 269973917;269973915                                                                                                     | N-Term(iTRAQ4plex)                                                   | 2648.33951 |  |  |  | 3.94 | Expt1 |
| GWVTVNEDSGSITIFR                 | 1 | 7305007                                                                                                                 | N-Term(iTRAQ4plex)                                                   | 1924.99089 |  |  |  | 3.92 | Expt1 |
| LIVDEAINEDNSVVSLSQPK             | 1 | 225543319;94408011                                                                                                      | N-Term(iTRAQ4plex), N11(Deamidated), K20(iTRAQ4plex)                 | 2459.33860 |  |  |  | 3.92 | Expt1 |
| YEVSSYTDQFSR                     | 1 | 254675279;254675277                                                                                                     | N-Term(iTRAQ4plex)                                                   | 1625.75664 |  |  |  | 3.92 | Expt1 |
| GEVAGQTLSLMEQLR                  | 2 | 269954677;269954679                                                                                                     | N-Term(iTRAQ4plex), M11(Oxidation)                                   | 1791.93894 |  |  |  | 3.91 | Expt1 |
| VTLVQTLEIQR                      | 3 | 256000745;256418964;254675117;254675195;254675201;254675251;254675253;254675259;254675119;254675244;254675265;254675115 | N-Term(iTRAQ4plex)                                                   | 1443.86797 |  |  |  | 3.91 | Expt1 |
| MSSTFIGNSTAIQELFK                | 1 | 83030206;12963615                                                                                                       | N-Term(iTRAQ4plex), K17(iTRAQ4plex)                                  | 2162.15128 |  |  |  | 3.91 | Expt1 |
| AVAQPGQLQK                       | 3 | 239915968                                                                                                               | N-Term(iTRAQ4plex), Q4(Deamidated), K10(iTRAQ4plex)                  | 1313.80913 |  |  |  | 3.90 | Expt1 |
| DVIDEPIIEPSR                     | 2 | 254692855                                                                                                               | N-Term(iTRAQ4plex)                                                   | 1655.86199 |  |  |  | 3.90 | Expt1 |
| DLEGSIDTR                        | 2 | 12963737                                                                                                                | N-Term(iTRAQ4plex)                                                   | 1264.61052 |  |  |  | 3.90 | Expt1 |
| VAIQLNDTHPALSIPELMR              | 1 | 24418919                                                                                                                | N-Term(iTRAQ4plex)                                                   | 2262.24588 |  |  |  | 3.90 | Expt1 |
| ALGSEGEAAATEVDLER                | 3 | 257467552;257467554                                                                                                     | N-Term(iTRAQ4plex)                                                   | 1861.92734 |  |  |  | 3.90 | Expt1 |
| DGDAPLAAAAGVLDLPGTAVPSGQEDATTAGR | 1 | 124517716                                                                                                               | N-Term(iTRAQ4plex)                                                   | 2995.47745 |  |  |  | 3.89 | Expt1 |
| SLAAEEEEAR                       | 6 | 256000745;256418964;254675117;254675195;254675201;254675251;254675253;254675259;254675119;254675244;254675265;254675115 | N-Term(iTRAQ4plex)                                                   | 1190.61467 |  |  |  | 3.89 | Expt1 |
| AVTSEIAVLQSR                     | 4 | 282398108                                                                                                               | N-Term(iTRAQ4plex)                                                   | 1417.81413 |  |  |  | 3.89 | Expt1 |
| AVLGEVALYSGAR                    | 1 | 255069795                                                                                                               | N-Term(iTRAQ4plex)                                                   | 1449.82073 |  |  |  | 3.88 | Expt1 |
| TEVVETTQVYTEEETR                 | 5 | 256000745;256418964;254675117;254675195;254675201;254675251;254675253;254675259;254675119;254675244;254675265;254675115 | N-Term(iTRAQ4plex)                                                   | 2057.99907 |  |  |  | 3.87 | Expt1 |
| ENENVINEYSSILEDQR                | 1 | 33859809                                                                                                                | N-Term(iTRAQ4plex)                                                   | 2196.05747 |  |  |  | 3.87 | Expt1 |
| IFYPETTDIYDR                     | 6 | 242332572                                                                                                               | N-Term(iTRAQ4plex)                                                   | 1676.83489 |  |  |  | 3.86 | Expt1 |
| GVPTGFVLPPIR                     | 3 | 261878543                                                                                                               | N-Term(iTRAQ4plex)                                                   | 1299.79070 |  |  |  | 3.85 | Expt1 |
| TEVEGLQQQDQLWTER                 | 1 | 20127150                                                                                                                | N-Term(iTRAQ4plex)                                                   | 2191.07755 |  |  |  | 3.85 | Expt1 |
| AQVEQELTTLR                      | 1 | 256000745;256418964;254675117;254675195;254675201;254675251;254675253;254675259;254675119;254675244;254675265;254675115 | N-Term(iTRAQ4plex)                                                   | 1431.79460 |  |  |  | 3.85 | Expt1 |
| IAQNESELISDEAQDMLR               | 2 | 261823961                                                                                                               | N-Term(iTRAQ4plex), M17(Oxidation)                                   | 2350.13724 |  |  |  | 3.84 | Expt1 |
| TQGPYDVVVLPGNGLGAQNLSESPMK       | 2 | 55741460                                                                                                                | N-Term(iTRAQ4plex), N14(Deamidated), M25(Oxidation), K27(iTRAQ4plex) | 3075.58261 |  |  |  | 3.84 | Expt1 |
| NDFEDVFNIPR                      | 1 | 254692859                                                                                                               | N-Term(iTRAQ4plex)                                                   | 1755.89006 |  |  |  | 3.84 | Expt1 |
| QEEVYSELQAR                      | 1 | 256000745;256418964;254675117;254675195;254675201;254675251;254675253;254675259;254675119;254675244;254675265;254675115 | N-Term(iTRAQ4plex)                                                   | 1495.75517 |  |  |  | 3.84 | Expt1 |
| SIMEQFNPALENLVLGNNYLR            | 3 | 29243932                                                                                                                | N-Term(iTRAQ4plex), M3(Oxidation), N18(Deamidated), N19(Deamidated)  | 2760.37369 |  |  |  | 3.83 | Expt1 |
| LLDPEDVDVQPDEK                   | 8 | 256000745;256418964;254675117;254675195;254675201;254675251;254675253;254675259;254675119;254675244;254675265;254675115 | N-Term(iTRAQ4plex), K15(iTRAQ4plex)                                  | 1997.03984 |  |  |  | 3.82 | Expt1 |
| ADFPAGIPECGTDLAR                 | 1 | 255069795                                                                                                               | N-Term(iTRAQ4plex), C10(Methylthio)                                  | 1822.86553 |  |  |  | 3.82 | Expt1 |
| NFQMIPGVVDGEFLPK                 | 3 | 268839831                                                                                                               | N-Term(iTRAQ4plex), K16(iTRAQ4plex)                                  | 2079.12577 |  |  |  | 3.81 | Expt1 |

|                                |   |                                                                                                                         |                                                                                    |            |  |  |  |      |       |
|--------------------------------|---|-------------------------------------------------------------------------------------------------------------------------|------------------------------------------------------------------------------------|------------|--|--|--|------|-------|
| VPLPSLSPTMQAGTIAR              | 3 | 257796245                                                                                                               | N-Term(iTRAQ4plex)                                                                 | 1883.05753 |  |  |  | 3.81 | Expt1 |
| LFYGDLPMPDQEELFGVPSLEQVK       | 1 | 114145467                                                                                                               | N-Term(iTRAQ4plex), M9(Oxidation), K25(iTRAQ4plex)                                 | 3112.58933 |  |  |  | 3.81 | Expt1 |
| DPYTGEQISLFQAMK                | 1 | 256000745;256418964;254675117;254675195;254675201;254675251;254675253;254675259;254675119;254675244;254675265;254675115 | N-Term(iTRAQ4plex), K15(iTRAQ4plex)                                                | 2016.04740 |  |  |  | 3.80 | Expt1 |
| GWLYYEAGQR                     | 1 | 256000745;256418964;254675117;254675195;254675201;254675251;254675253;254675259;254675119;254675244;254675265;254675115 | N-Term(iTRAQ4plex)                                                                 | 1386.69280 |  |  |  | 3.80 | Expt1 |
| QVQVALETAQR                    | 2 | 256000745;256418964;254675117;254675195;254675201;254675251;254675253;254675259;254675119;254675244;254675265;254675115 | N-Term(iTRAQ4plex)                                                                 | 1386.78325 |  |  |  | 3.80 | Expt1 |
| LFVGNLPPDITEEEMR               | 2 | 255958247                                                                                                               | N-Term(iTRAQ4plex), M15(Oxidation)                                                 | 2020.02262 |  |  |  | 3.80 | Expt1 |
| NTVMCAVVEQFLQAEQAR             | 1 | 145207948                                                                                                               | N-Term(iTRAQ4plex), C5(Methylthio)                                                 | 2227.08634 |  |  |  | 3.78 | Expt1 |
| YEISVIAEYSSGPGSPLTGNAAATEEVR   | 1 | 111074529                                                                                                               | N-Term(iTRAQ4plex), Y9(iTRAQ4plex)                                                 | 3085.55898 |  |  |  | 3.77 | Expt1 |
| ALQALDELRL                     | 7 | 256000745;256418964;254675117;254675195;254675201;254675251;254675253;254675259;254675119;254675244;254675265;254675115 | N-Term(iTRAQ4plex)                                                                 | 1172.67583 |  |  |  | 3.77 | Expt1 |
| LANQAADYFGDAFK                 | 2 | 258547154;258547156;258547152                                                                                           | N-Term(iTRAQ4plex), K14(iTRAQ4plex)                                                | 1818.93901 |  |  |  | 3.76 | Expt1 |
| MIPCDFLIPVQTHPIR               | 2 | 254553458                                                                                                               | N-Term(iTRAQ4plex), C4(Methylthio)                                                 | 2198.14652 |  |  |  | 3.75 | Expt1 |
| FGIQAQMVTTDFQK                 | 1 | 6755202                                                                                                                 | N-Term(iTRAQ4plex), K14(iTRAQ4plex)                                                | 1902.00895 |  |  |  | 3.75 | Expt1 |
| GVQGIIVNTEGIPIK                | 1 | 254540041                                                                                                               | N-Term(iTRAQ4plex), K16(iTRAQ4plex)                                                | 1925.17875 |  |  |  | 3.74 | Expt1 |
| LSVAAQEAAAR                    | 2 | 256000745;256418964;254675117;254675195;254675201;254675251;254675253;254675259;254675119;254675244;254675265;254675115 | N-Term(iTRAQ4plex)                                                                 | 1159.65593 |  |  |  | 3.73 | Expt1 |
| QVMADSGPIYDQTYAGGR             | 2 | 239787900                                                                                                               | N-Term(iTRAQ4plex)                                                                 | 2072.97954 |  |  |  | 3.73 | Expt1 |
| DGNLMFDQVPMVEIDGMK             | 1 | 149259801;149260087;169808401;50263046;154350202                                                                        | N-Term(iTRAQ4plex), M11(Oxidation), K18(iTRAQ4plex)                                | 2343.13510 |  |  |  | 3.73 | Expt1 |
| LQAALDNEAGGRPAMEPGNSLDLGGDAAGR | 1 | 160333923                                                                                                               | N-Term(iTRAQ4plex)                                                                 | 3124.51755 |  |  |  | 3.72 | Expt1 |
| SQVMDEATALQLQEGLTSIEEVTK       | 1 | 256000745;256418964;254675117;254675195;254675201;254675251;254675253;254675259;254675119;254675244;254675265;254675115 | N-Term(iTRAQ4plex), M4(Oxidation), K24(iTRAQ4plex)                                 | 2924.50412 |  |  |  | 3.72 | Expt1 |
| YGEPEVFINK                     | 2 | 149252953;23956214                                                                                                      | N-Term(iTRAQ4plex), K11(iTRAQ4plex)                                                | 1540.82732 |  |  |  | 3.72 | Expt1 |
| VPLPSLSPTMQAGTIAR              | 2 | 257796245                                                                                                               | N-Term(iTRAQ4plex), M10(Oxidation)                                                 | 1899.05326 |  |  |  | 3.71 | Expt1 |
| AAELLPAAAAWR                   | 2 | 254675232                                                                                                               | N-Term(iTRAQ4plex)                                                                 | 1496.87358 |  |  |  | 3.71 | Expt1 |
| DIPAYSQDTFK                    | 1 | 282398108                                                                                                               | N-Term(iTRAQ4plex), K11(iTRAQ4plex)                                                | 1572.81780 |  |  |  | 3.71 | Expt1 |
| LEDSLAPQPFLR                   | 1 | 16418335                                                                                                                | N-Term(iTRAQ4plex)                                                                 | 1642.93169 |  |  |  | 3.71 | Expt1 |
| ASEDFVDPWTVR                   | 1 | 256818802;256818806                                                                                                     | N-Term(iTRAQ4plex)                                                                 | 1565.77544 |  |  |  | 3.71 | Expt1 |
| NVSLGNVLAVAYAAK                | 2 | 244791124                                                                                                               | N-Term(iTRAQ4plex), K15(iTRAQ4plex)                                                | 1778.04947 |  |  |  | 3.71 | Expt1 |
| DFTATFGPLDSLNTNR               | 1 | 251823978;251823980                                                                                                     | N-Term(iTRAQ4plex)                                                                 | 1798.91484 |  |  |  | 3.71 | Expt1 |
| FILDGWHHEMPEPLFPSPSMNNLVAQK    | 1 | 111038118                                                                                                               | N-Term(iTRAQ4plex), K29(iTRAQ4plex)                                                | 3656.82802 |  |  |  | 3.70 | Expt1 |
| DMIILPEMVGSMGVVYNGK            | 1 | 6677799;94377390                                                                                                        | N-Term(iTRAQ4plex), M2(Oxidation), M8(Oxidation), N17(Deamidated), K19(iTRAQ4plex) | 2374.19950 |  |  |  | 3.69 | Expt1 |
| FEEPAPLSYDSR                   | 2 | 254675279;254675277                                                                                                     | N-Term(iTRAQ4plex)                                                                 | 1554.76006 |  |  |  | 3.68 | Expt1 |
| SDGSLMFQQVPMVEIDGMK            | 3 | 31981724                                                                                                                | N-Term(iTRAQ4plex), M12(Oxidation), K19(iTRAQ4plex)                                | 2416.18906 |  |  |  | 3.68 | Expt1 |
| QDPVYVPPISCNK                  | 2 | 9790161                                                                                                                 | N-Term(iTRAQ4plex), C11(Methylthio), K13(iTRAQ4plex)                               | 1793.91959 |  |  |  | 3.68 | Expt1 |

|                                  |    |                                                                                                                         |                                                                     |            |  |  |  |      |       |
|----------------------------------|----|-------------------------------------------------------------------------------------------------------------------------|---------------------------------------------------------------------|------------|--|--|--|------|-------|
| WQAVLAQTDVR                      | 1  | 256000745;256418964;254675117;254675195;254675201;254675251;254675253;254675259;254675119;254675244;254675265;254675115 | N-Term(iTRAQ4plex)                                                  | 1430.78801 |  |  |  | 3.68 | Expt1 |
| CILDSELEGIR                      | 1  | 240120117;240120119                                                                                                     | N-Term(iTRAQ4plex), C1(Methylthio)                                  | 1437.72185 |  |  |  | 3.68 | Expt1 |
| FEELNMDLFR                       | 5  | 254540166                                                                                                               | N-Term(iTRAQ4plex)                                                  | 1457.72685 |  |  |  | 3.67 | Expt1 |
| INESDPEYLR                       | 1  | 31542111;255759888;255759890                                                                                            | N-Term(iTRAQ4plex)                                                  | 1379.69451 |  |  |  | 3.67 | Expt1 |
| ITGWGEETLPDGR                    | 1  | 270132817                                                                                                               | N-Term(iTRAQ4plex)                                                  | 1574.79155 |  |  |  | 3.66 | Expt1 |
| LQLDSPEDAEIFVAK                  | 1  | 19705424                                                                                                                | N-Term(iTRAQ4plex), K15(iTRAQ4plex)                                 | 1963.06968 |  |  |  | 3.66 | Expt1 |
| SLQEQTVLQQLSELSR                 | 1  | 270309140                                                                                                               | N-Term(iTRAQ4plex)                                                  | 1890.00871 |  |  |  | 3.65 | Expt1 |
| QELMASMEEAR                      | 1  | 256000745;256418964;254675117;254675195;254675201;254675251;254675253;254675259;254675119;254675244;254675265;254675115 | N-Term(iTRAQ4plex)                                                  | 1438.67961 |  |  |  | 3.65 | Expt1 |
| ENEFSFEDNAIR                     | 1  | 189458814;124487025;39204553                                                                                            | N-Term(iTRAQ4plex)                                                  | 1614.75432 |  |  |  | 3.65 | Expt1 |
| SLSAIYLEK                        | 2  | 256000745;256418964;254675117;254675195;254675201;254675251;254675253;254675259;254675119;254675244;254675265;254675115 | N-Term(iTRAQ4plex), K9(iTRAQ4plex)                                  | 1311.78826 |  |  |  | 3.64 | Expt1 |
| DYELEAEK                         | 1  | 112421039                                                                                                               | N-Term(iTRAQ4plex), K8(iTRAQ4plex)                                  | 1284.65764 |  |  |  | 3.64 | Expt1 |
| LYNSQTANPGERPVFHSQN              | 11 | 149252883                                                                                                               | N-Term(iTRAQ4plex), Y2(iTRAQ4plex)                                  | 2447.23404 |  |  |  | 3.63 | Expt1 |
| LVALLDTLDR                       | 4  | 254587947                                                                                                               | N-Term(iTRAQ4plex)                                                  | 1272.76702 |  |  |  | 3.63 | Expt1 |
| LAEDEAFQR                        | 2  | 256000745;256418964;254675117;254675195;254675201;254675251;254675253;254675259;254675119;254675244;254675265;254675115 | N-Term(iTRAQ4plex)                                                  | 1222.62041 |  |  |  | 3.63 | Expt1 |
| ELATVLSQDPGLLQPK                 | 1  | 28395023                                                                                                                | N-Term(iTRAQ4plex), K16(iTRAQ4plex)                                 | 1926.11954 |  |  |  | 3.62 | Expt1 |
| ELEEIVQPIISK                     | 10 | 254540166                                                                                                               | N-Term(iTRAQ4plex), K12(iTRAQ4plex)                                 | 1685.99626 |  |  |  | 3.62 | Expt1 |
| VVNAAIATASSAPGESEEPVPSASR        | 1  | 55926127                                                                                                                | N-Term(iTRAQ4plex)                                                  | 2640.36953 |  |  |  | 3.62 | Expt1 |
| GEFITTVQQR                       | 9  | 254540027                                                                                                               | N-Term(iTRAQ4plex)                                                  | 1322.71843 |  |  |  | 3.62 | Expt1 |
| SYEAYVLNIIR                      | 1  | 6753138                                                                                                                 | N-Term(iTRAQ4plex)                                                  | 1484.82720 |  |  |  | 3.61 | Expt1 |
| YEELFPAFSDSR                     | 1  | 13385392                                                                                                                | N-Term(iTRAQ4plex)                                                  | 1604.77727 |  |  |  | 3.61 | Expt1 |
| LYDEMPPSALQR                     | 4  | 242332585;242332587                                                                                                     | N-Term(iTRAQ4plex)                                                  | 1563.79582 |  |  |  | 3.61 | Expt1 |
| TTNFAGILSQGLR                    | 1  | 20806109                                                                                                                | N-Term(iTRAQ4plex)                                                  | 1521.85393 |  |  |  | 3.61 | Expt1 |
| VSAILPGAPDNLPSNEVFQPEEK          | 1  | 241982745                                                                                                               | N-Term(iTRAQ4plex), K25(iTRAQ4plex)                                 | 2997.53739 |  |  |  | 3.60 | Expt1 |
| VYCENQMLPIGLSDIPGEAMVK           | 1  | 7106277                                                                                                                 | N-Term(iTRAQ4plex), C3(Methylthio), K23(iTRAQ4plex)                 | 2838.42185 |  |  |  | 3.60 | Expt1 |
| FGSLLPIHPVTSG                    | 5  | 254587947                                                                                                               | N-Term(iTRAQ4plex)                                                  | 1468.83196 |  |  |  | 3.60 | Expt1 |
| SFPVNSDVGVLK                     | 1  | 148747410                                                                                                               | N-Term(iTRAQ4plex), K12(iTRAQ4plex)                                 | 1549.88542 |  |  |  | 3.59 | Expt1 |
| VMAGDEWLFEGPGTYIPOK              | 1  | 239052674                                                                                                               | N-Term(iTRAQ4plex), M2(Oxidation), K19(iTRAQ4plex)                  | 2442.23050 |  |  |  | 3.59 | Expt1 |
| GTLVLLEGPGTSQR                   | 1  | 239787900                                                                                                               | N-Term(iTRAQ4plex)                                                  | 1571.88786 |  |  |  | 3.59 | Expt1 |
| YVENFGLIDGR                      | 3  | 13385134                                                                                                                | N-Term(iTRAQ4plex)                                                  | 1426.74870 |  |  |  | 3.59 | Expt1 |
| SVDETTQAMAFDGIIFQGQSLK           | 1  | 164565377                                                                                                               | N-Term(iTRAQ4plex), Q7(Deamidated), K22(iTRAQ4plex)                 | 2675.37046 |  |  |  | 3.58 | Expt1 |
| GADIMYTGTLDCWR                   | 1  | 148747424                                                                                                               | N-Term(iTRAQ4plex), C12(Methylthio)                                 | 1791.80229 |  |  |  | 3.58 | Expt1 |
| LSLDQNIYNACCTLR                  | 1  | 116517303;116517301                                                                                                     | N-Term(iTRAQ4plex), C12(Methylthio), C13(Methylthio)                | 2019.92497 |  |  |  | 3.58 | Expt1 |
| SPTSPVTEPLPQPNAPTEVEAR           | 2  | 124487435                                                                                                               | N-Term(iTRAQ4plex)                                                  | 2461.27292 |  |  |  | 3.58 | Expt1 |
| ANLGGTEILPLCNIYK                 | 1  | 225543183                                                                                                               | N-Term(iTRAQ4plex), C13(Methylthio), K17(iTRAQ4plex)                | 2154.16001 |  |  |  | 3.57 | Expt1 |
| WIDETPPVDQPSR                    | 5  | 254587947                                                                                                               | N-Term(iTRAQ4plex)                                                  | 1683.85100 |  |  |  | 3.57 | Expt1 |
| GNSLQEILER                       | 1  | 19527028                                                                                                                | N-Term(iTRAQ4plex)                                                  | 1302.71282 |  |  |  | 3.57 | Expt1 |
| MGYTDISAVDPPEIHGPPFQFNLANTSPEVNR | 1  | 133778947                                                                                                               | N-Term(iTRAQ4plex)                                                  | 3772.80649 |  |  |  | 3.57 | Expt1 |
| DQNGTWEMESNENFEGYMK              | 2  | 255759938                                                                                                               | N-Term(iTRAQ4plex), N3(Deamidated), M18(Oxidation), K19(iTRAQ4plex) | 2614.10172 |  |  |  | 3.57 | Expt1 |

|                             |   |                                                                                                                         |                                                      |            |  |  |  |      |       |
|-----------------------------|---|-------------------------------------------------------------------------------------------------------------------------|------------------------------------------------------|------------|--|--|--|------|-------|
| GLFDEEMNEILTPSDDTK          | 1 | 256000745;256418964;254675117;254675195;254675201;254675251;254675253;254675259;254675119;254675244;254675265;254675115 | N-Term(iTRAQ4plex), M7(Oxidation), K19(iTRAQ4plex)   | 2473.16269 |  |  |  | 3.55 | Expt1 |
| GEVGPAGPNGFAGPAGAAGQPGA     | 1 | 111120329                                                                                                               | N-Term(iTRAQ4plex), K24(iTRAQ4plex)                  | 2323.17661 |  |  |  | 3.54 | Expt1 |
| QAVDVSPRLR                  | 6 | 254675270                                                                                                               | N-Term(iTRAQ4plex)                                   | 1128.64946 |  |  |  | 3.54 | Expt1 |
| AAIAAAAAAAAAAK              | 1 | 13385472                                                                                                                | N-Term(iTRAQ4plex), K13(iTRAQ4plex)                  | 1329.80527 |  |  |  | 3.54 | Expt1 |
| IVESDVGDSFYIR               | 1 | 254675279;254675277                                                                                                     | N-Term(iTRAQ4plex)                                   | 1643.84380 |  |  |  | 3.54 | Expt1 |
| SGCTINNPAAEFIVDPK           | 1 | 145966915                                                                                                               | N-Term(iTRAQ4plex), C3(Methylthio), K16(iTRAQ4plex)  | 2039.02054 |  |  |  | 3.53 | Expt1 |
| GENGIVGPTGSVGAGPSGPNPVPVGSR | 1 | 111120329                                                                                                               | N-Term(iTRAQ4plex), N3(Deamidated), N21(Deamidated)  | 2745.35904 |  |  |  | 3.53 | Expt1 |
| LGEHNINVLGNEQFIDAAK         | 1 | 16716569                                                                                                                | N-Term(iTRAQ4plex), K20(iTRAQ4plex)                  | 2499.31107 |  |  |  | 3.53 | Expt1 |
| NFSGAELEGLVR                | 1 | 31543349                                                                                                                | N-Term(iTRAQ4plex)                                   | 1435.76982 |  |  |  | 3.53 | Expt1 |
| GLDPYNMLPPK                 | 2 | 149263037                                                                                                               | N-Term(iTRAQ4plex), K11(iTRAQ4plex)                  | 1532.84563 |  |  |  | 3.52 | Expt1 |
| SIITYVSSLYDAMPR             | 5 | 256000745;256418964;254675117;254675195;254675201;254675251;254675253;254675259;254675119;254675244;254675265;254675115 | N-Term(iTRAQ4plex), M13(Oxidation)                   | 1875.96732 |  |  |  | 3.52 | Expt1 |
| IDMNLTDLLGELQR              | 1 | 67906177;149249764;31980969                                                                                             | N-Term(iTRAQ4plex), M3(Oxidation)                    | 1790.94321 |  |  |  | 3.52 | Expt1 |
| GWAPTLIGYSMQGLCK            | 1 | 149258501;19526818                                                                                                      | N-Term(iTRAQ4plex), C15(Methylthio), K16(iTRAQ4plex) | 2059.04203 |  |  |  | 3.52 | Expt1 |
| LTESVDVLPNVEIGVGGSMR        | 1 | 219276601;219275596                                                                                                     | N-Term(iTRAQ4plex)                                   | 2347.22165 |  |  |  | 3.52 | Expt1 |
| MIAGQVLDINLAAEPK            | 1 | 8393544;283436180;283436176;283436182                                                                                   | N-Term(iTRAQ4plex), M1(Oxidation), K16(iTRAQ4plex)   | 1987.12314 |  |  |  | 3.51 | Expt1 |
| DIYNLQQPEDSQSPQLTSVGLSR     | 3 | 244790065                                                                                                               | N-Term(iTRAQ4plex)                                   | 2719.37510 |  |  |  | 3.51 | Expt1 |
| ELPWPLAFEK                  | 1 | 244791124                                                                                                               | N-Term(iTRAQ4plex), K10(iTRAQ4plex)                  | 1517.86772 |  |  |  | 3.51 | Expt1 |
| AVLDAVETGTEAAATGVK          | 1 | 124517726;130503301;149263620                                                                                           | N-Term(iTRAQ4plex), K19(iTRAQ4plex)                  | 2062.13028 |  |  |  | 3.50 | Expt1 |
| ETLSVDPFPLSDQIR             | 1 | 124378050                                                                                                               | N-Term(iTRAQ4plex)                                   | 1860.98796 |  |  |  | 3.49 | Expt1 |
| ILQAVEFFFLVR                | 1 | 6755076;255958156;255958318;255958320                                                                                   | N-Term(iTRAQ4plex)                                   | 1575.94426 |  |  |  | 3.49 | Expt1 |
| MIPCDFLIPVQTHPIR            | 1 | 254553458                                                                                                               | N-Term(iTRAQ4plex), M1(Oxidation), C4(Methylthio)    | 2214.14298 |  |  |  | 3.49 | Expt1 |
| SILDEELQR                   | 5 | 256000745;256418964;254675117;254675195;254675201;254675251;254675253;254675259;254675119;254675244;254675265;254675115 | N-Term(iTRAQ4plex)                                   | 1246.67815 |  |  |  | 3.49 | Expt1 |
| FLQTAENILPLETTQELPPK        | 1 | 27734136                                                                                                                | N-Term(iTRAQ4plex), K20(iTRAQ4plex)                  | 2570.43875 |  |  |  | 3.49 | Expt1 |
| FNMGLLMGEAR                 | 1 | 269954677                                                                                                               | N-Term(iTRAQ4plex)                                   | 1382.70879 |  |  |  | 3.49 | Expt1 |
| VQVVDEEGDQQHQEGK            | 3 | 65301157;148536867                                                                                                      | N-Term(iTRAQ4plex), Q13(Deamidated), K16(iTRAQ4plex) | 2114.02456 |  |  |  | 3.48 | Expt1 |
| NIYWNTLNSGR                 | 1 | 269973935                                                                                                               | N-Term(iTRAQ4plex), N1(Deamidated)                   | 1482.74834 |  |  |  | 3.48 | Expt1 |
| ELPDLEDLMK                  | 2 | 255003777                                                                                                               | N-Term(iTRAQ4plex), K10(iTRAQ4plex)                  | 1490.80791 |  |  |  | 3.48 | Expt1 |
| VMVQPINLIFR                 | 3 | 27883844                                                                                                                | N-Term(iTRAQ4plex), M2(Oxidation)                    | 1489.87212 |  |  |  | 3.48 | Expt1 |
| ADFAQACQDAGVR               | 2 | 251823978;251823980                                                                                                     | N-Term(iTRAQ4plex), C7(Methylthio)                   | 1541.69829 |  |  |  | 3.48 | Expt1 |
| EGETYYDVVAVDPVTR            | 1 | 236466498                                                                                                               | N-Term(iTRAQ4plex)                                   | 2056.03965 |  |  |  | 3.47 | Expt1 |
| AGTLSITEFADMLSGNAGGFR       | 1 | 256000745;256418964;254675117;254675195;254675201;254675251;254675253;254675259;254675119;254675244;254675265;254675115 | N-Term(iTRAQ4plex)                                   | 2259.12090 |  |  |  | 3.47 | Expt1 |
| LWTLVSEQTR                  | 2 | 82885877;94369475;63572172;82885753;94378045;82933068;82995837                                                          | N-Term(iTRAQ4plex)                                   | 1376.77092 |  |  |  | 3.46 | Expt1 |
| ELQELQDSLNVLR               | 1 | 270309140                                                                                                               | N-Term(iTRAQ4plex)                                   | 1716.89104 |  |  |  | 3.46 | Expt1 |
| IQENVPVGTGR                 | 4 | 7305007                                                                                                                 | N-Term(iTRAQ4plex)                                   | 1256.70928 |  |  |  | 3.45 | Expt1 |
| LVTFESVAVPLQQGAEQQR         | 1 | 244791271                                                                                                               | N-Term(iTRAQ4plex)                                   | 2244.21933 |  |  |  | 3.45 | Expt1 |
| VELDNMPLR                   | 3 | 255958247                                                                                                               | N-Term(iTRAQ4plex)                                   | 1230.66570 |  |  |  | 3.45 | Expt1 |
| DDNSVELTVAEGPYK             | 1 | 6679891                                                                                                                 | N-Term(iTRAQ4plex), K15(iTRAQ4plex)                  | 1924.97953 |  |  |  | 3.44 | Expt1 |

|                        |   |                                                                                                                         |                                                     |            |  |  |  |      |       |
|------------------------|---|-------------------------------------------------------------------------------------------------------------------------|-----------------------------------------------------|------------|--|--|--|------|-------|
| SVENAVCVLR             | 3 | 242332585;242332587                                                                                                     | N-Term(iTRAQ4plex), C7(Methylthio)                  | 1279.66289 |  |  |  | 3.43 | Expt1 |
| EIGLLTEEVLYGETK        | 1 | 261878543                                                                                                               | N-Term(iTRAQ4plex), K16(iTRAQ4plex)                 | 2111.14194 |  |  |  | 3.43 | Expt1 |
| TILPAAAQDVYYR          | 2 | 282398108                                                                                                               | N-Term(iTRAQ4plex)                                  | 1624.88274 |  |  |  | 3.43 | Expt1 |
| LLSSAFDEVYPALPSDVQTAIK | 1 | 29789199                                                                                                                | N-Term(iTRAQ4plex), K22(iTRAQ4plex)                 | 2652.45078 |  |  |  | 3.43 | Expt1 |
| MLDMGFEPQIR            | 2 | 25141235;6753620;14861844;40068493;93587673;40068491;83816893                                                           | N-Term(iTRAQ4plex)                                  | 1480.74419 |  |  |  | 3.43 | Expt1 |
| GGYVEVNMMAEIVQK        | 1 | 33413404                                                                                                                | N-Term(iTRAQ4plex), K15(iTRAQ4plex)                 | 1925.99283 |  |  |  | 3.43 | Expt1 |
| AAVMATLLFPGQEFK        | 1 | 258613873                                                                                                               | N-Term(iTRAQ4plex), K15(iTRAQ4plex)                 | 1911.07798 |  |  |  | 3.42 | Expt1 |
| ALEEFQSEVSSCR          | 1 | 33563297                                                                                                                | N-Term(iTRAQ4plex), C12(Methylthio)                 | 1674.76067 |  |  |  | 3.42 | Expt1 |
| NPAVLSAASFQGR          | 1 | 244791271                                                                                                               | N-Term(iTRAQ4plex)                                  | 1448.76543 |  |  |  | 3.42 | Expt1 |
| SLESCLDLR              | 2 | 269914118                                                                                                               | N-Term(iTRAQ4plex), C5(Methylthio)                  | 1338.68694 |  |  |  | 3.42 | Expt1 |
| ELAEAAAR               | 1 | 256000745;256418964;254675117;254675195;254675201;254675251;254675253;254675259;254675119;254675244;254675265;254675115 | N-Term(iTRAQ4plex)                                  | 1032.54350 |  |  |  | 3.42 | Expt1 |
| GEGWGDPCELCPTPEDEAFR   | 1 | 118197277                                                                                                               | N-Term(iTRAQ4plex), C8(Methylthio), C11(Methylthio) | 2443.98355 |  |  |  | 3.41 | Expt1 |
| VVIVDPETGK             | 1 | 256000745;256418964;254675117;254675195;254675201;254675251;254675253;254675259;254675119;254675244;254675265;254675115 | N-Term(iTRAQ4plex), K10(iTRAQ4plex)                 | 1344.80290 |  |  |  | 3.41 | Expt1 |
| SCGSSTPDEFPTDIPGTK     | 1 | 149271434;149274434;6753738                                                                                             | N-Term(iTRAQ4plex), C2(Methylthio), K18(iTRAQ4plex) | 2173.00504 |  |  |  | 3.41 | Expt1 |
| TPIGSFLGSLASQPATK      | 1 | 21450129                                                                                                                | N-Term(iTRAQ4plex), K17(iTRAQ4plex)                 | 1963.10959 |  |  |  | 3.41 | Expt1 |
| EIDPQNDLTFLR           | 4 | 254540041                                                                                                               | N-Term(iTRAQ4plex)                                  | 1604.84343 |  |  |  | 3.40 | Expt1 |
| FTAGDFSTTVIQNVNK       | 1 | 12963799                                                                                                                | N-Term(iTRAQ4plex), K16(iTRAQ4plex)                 | 2030.08646 |  |  |  | 3.40 | Expt1 |
| YTGPTYVSLLEQPLK        | 1 | 110625833                                                                                                               | N-Term(iTRAQ4plex), K15(iTRAQ4plex)                 | 2013.08969 |  |  |  | 3.40 | Expt1 |
| ALDIDFATR              | 8 | 255759938                                                                                                               | N-Term(iTRAQ4plex)                                  | 1165.63323 |  |  |  | 3.40 | Expt1 |
| TIGTGLVTDVPAMTEEDK     | 1 | 149258822;27370092                                                                                                      | N-Term(iTRAQ4plex), K18(iTRAQ4plex)                 | 2165.13004 |  |  |  | 3.40 | Expt1 |
| DAGTIAGLNVMR           | 2 | 254540166                                                                                                               | N-Term(iTRAQ4plex), M11(Oxidation)                  | 1377.72978 |  |  |  | 3.39 | Expt1 |
| LGLPLTPQEQQEALQK       | 2 | 76677895;257196186;257196183                                                                                            | N-Term(iTRAQ4plex), K16(iTRAQ4plex)                 | 2050.18485 |  |  |  | 3.39 | Expt1 |
| SGVSITIDPVR            | 1 | 194394197;146231985;194394192;194394195                                                                                 | N-Term(iTRAQ4plex)                                  | 1402.76921 |  |  |  | 3.39 | Expt1 |
| LTVDEAVR               | 6 | 256000745;256418964;254675117;254675195;254675201;254675251;254675253;254675259;254675119;254675244;254675265;254675115 | N-Term(iTRAQ4plex)                                  | 1046.59770 |  |  |  | 3.39 | Expt1 |
| LQIQGENPGAQSVQYR       | 9 | 6678495                                                                                                                 | N-Term(iTRAQ4plex), Y15(iTRAQ4plex)                 | 2076.09775 |  |  |  | 3.39 | Expt1 |
| EEVAPGGAGTER           | 4 | 269914118                                                                                                               | N-Term(iTRAQ4plex)                                  | 1415.72869 |  |  |  | 3.39 | Expt1 |
| ELSEVGSVR              | 5 | 256000745;256418964;254675117;254675195;254675201;254675251;254675253;254675259;254675119;254675244;254675265;254675115 | N-Term(iTRAQ4plex)                                  | 1119.61321 |  |  |  | 3.38 | Expt1 |
| TLETPAAQMEGFLNR        | 1 | 117938332                                                                                                               | N-Term(iTRAQ4plex), M9(Oxidation)                   | 1837.92698 |  |  |  | 3.38 | Expt1 |
| QLLEELAR               | 3 | 256000745;256418964;254675117;254675195;254675201;254675251;254675253;254675259;254675119;254675244;254675265;254675115 | N-Term(iTRAQ4plex)                                  | 1244.69951 |  |  |  | 3.38 | Expt1 |
| SAAMYGSSFDLDYDFQR      | 1 | 283436180;283436176;283436182                                                                                           | N-Term(iTRAQ4plex), M5(Oxidation)                   | 2261.98258 |  |  |  | 3.38 | Expt1 |
| IMGPEDEQMGLLR          | 1 | 114326446                                                                                                               | N-Term(iTRAQ4plex), M2(Oxidation), M10(Oxidation)   | 1777.89676 |  |  |  | 3.38 | Expt1 |
| GAPGPVGGPDPGLMGER      | 1 | 6753484                                                                                                                 | N-Term(iTRAQ4plex), M15(Oxidation)                  | 1820.91008 |  |  |  | 3.38 | Expt1 |
| IAPPEAVPTGYMFGK        | 1 | 20806109                                                                                                                | N-Term(iTRAQ4plex), K15(iTRAQ4plex)                 | 1866.00986 |  |  |  | 3.38 | Expt1 |
| FSTIASSYECCR           | 1 | 244791124                                                                                                               | N-Term(iTRAQ4plex), C11(Methylthio)                 | 1582.69841 |  |  |  | 3.38 | Expt1 |
| LETGQFLTFR             | 1 | 27370032                                                                                                                | N-Term(iTRAQ4plex)                                  | 1355.74455 |  |  |  | 3.37 | Expt1 |



|                            |   |                                                                                                                         |                                                      |            |  |  |      |       |
|----------------------------|---|-------------------------------------------------------------------------------------------------------------------------|------------------------------------------------------|------------|--|--|------|-------|
| DVSVTVGLDSR                | 1 | 124249090                                                                                                               | N-Term(iTRAQ4plex)                                   | 1291.70073 |  |  | 3.37 | Expt1 |
| SISAPVIFDR                 | 1 | 13385878                                                                                                                | N-Term(iTRAQ4plex)                                   | 1248.70940 |  |  | 3.37 | Expt1 |
| ECQGLQVQVDLLQK             | 1 | 111185907                                                                                                               | N-Term(iTRAQ4plex), C2(Methylthio), K14(iTRAQ4plex)  | 1935.02835 |  |  | 3.37 | Expt1 |
| GQIEEAGWSYVGGWGTQGGSK      | 1 | 254553346                                                                                                               | N-Term(iTRAQ4plex), K21(iTRAQ4plex)                  | 2442.19571 |  |  | 3.36 | Expt1 |
| EQAEEAAR                   | 2 | 256000745;256418964;254675117;254675195;254675201;254675251;254675253;254675259;254675119;254675244;254675265;254675115 | N-Term(iTRAQ4plex)                                   | 1160.60295 |  |  | 3.36 | Expt1 |
| DVYEELLTQAEIQGNVVK         | 1 | 242332572                                                                                                               | N-Term(iTRAQ4plex), K18(iTRAQ4plex)                  | 2351.24118 |  |  | 3.36 | Expt1 |
| ATLEAESR                   | 1 | 82950147;82950149;149264086                                                                                             | N-Term(iTRAQ4plex)                                   | 1020.54753 |  |  | 3.36 | Expt1 |
| NENQLIFADDTYPR             | 1 | 19527174                                                                                                                | N-Term(iTRAQ4plex)                                   | 1952.98404 |  |  | 3.36 | Expt1 |
| LNMEAINYMAADGDFK           | 1 | 6678682                                                                                                                 | N-Term(iTRAQ4plex), M3(Oxidation), K16(iTRAQ4plex)   | 2123.00589 |  |  | 3.36 | Expt1 |
| DVDAAYMIK                  | 1 | 133778953                                                                                                               | N-Term(iTRAQ4plex), K9(iTRAQ4plex)                   | 1313.71391 |  |  | 3.36 | Expt1 |
| ILAIGLINEALDEGDAQK         | 1 | 242332572                                                                                                               | N-Term(iTRAQ4plex), K18(iTRAQ4plex)                  | 2171.22361 |  |  | 3.35 | Expt1 |
| DLYVSIQPVQEAR              | 1 | 254587958                                                                                                               | N-Term(iTRAQ4plex)                                   | 1661.90239 |  |  | 3.35 | Expt1 |
| NRGPQSPSPAGVHGAPAAFMPR     | 1 | 82999381                                                                                                                | N-Term(iTRAQ4plex), M20(Oxidation)                   | 2362.16837 |  |  | 3.35 | Expt1 |
| AFPVYLWQPYLR               | 3 | 241982745                                                                                                               | N-Term(iTRAQ4plex)                                   | 1696.93926 |  |  | 3.34 | Expt1 |
| APNDFNLQDFNVGDYIQAVALDR    | 1 | 268836255                                                                                                               | N-Term(iTRAQ4plex)                                   | 2668.32437 |  |  | 3.34 | Expt1 |
| LTVEEAVR                   | 4 | 256000745;256418964;254675117;254675195;254675201;254675251;254675253;254675259;254675119;254675244;254675265;254675115 | N-Term(iTRAQ4plex)                                   | 1060.61235 |  |  | 3.34 | Expt1 |
| IGGNEGIDVPIPR              | 1 | 84662730                                                                                                                | N-Term(iTRAQ4plex)                                   | 1480.82671 |  |  | 3.33 | Expt1 |
| SLLAQWQLSR                 | 2 | 256000745;256418964;254675117;254675195;254675201;254675251;254675253;254675259;254675119;254675244;254675265;254675115 | N-Term(iTRAQ4plex)                                   | 1304.74626 |  |  | 3.33 | Expt1 |
| EAEGTTTEDPR                | 1 | 254588049                                                                                                               | N-Term(iTRAQ4plex)                                   | 1349.63298 |  |  | 3.33 | Expt1 |
| DLVQDPSLLGGTISAYK          | 1 | 269973917;269973915                                                                                                     | N-Term(iTRAQ4plex), K17(iTRAQ4plex)                  | 2065.15189 |  |  | 3.33 | Expt1 |
| LVAEFTTSLTNFQK             | 2 | 31560462                                                                                                                | N-Term(iTRAQ4plex), K14(iTRAQ4plex)                  | 1887.05234 |  |  | 3.33 | Expt1 |
| VVQALDPLGSR                | 1 | 31657132                                                                                                                | N-Term(iTRAQ4plex)                                   | 1298.75676 |  |  | 3.33 | Expt1 |
| ASQAPSSFQLLYDLK            | 2 | 261878543                                                                                                               | N-Term(iTRAQ4plex), K15(iTRAQ4plex)                  | 1956.07560 |  |  | 3.32 | Expt1 |
| ISGETIFVTAPHEATAGIIGVNR    | 1 | 51491845                                                                                                                | N-Term(iTRAQ4plex)                                   | 2497.35642 |  |  | 3.31 | Expt1 |
| EGVLGQVPLAPPQPGAPPSPAPAR   | 1 | 92110037                                                                                                                | N-Term(iTRAQ4plex)                                   | 2447.35727 |  |  | 3.31 | Expt1 |
| IGFFNQYAEQLHMEETPTTEYLQR   | 1 | 39930335                                                                                                                | N-Term(iTRAQ4plex)                                   | 3116.50449 |  |  | 3.31 | Expt1 |
| FNEVVSALK                  | 1 | 261823961                                                                                                               | N-Term(iTRAQ4plex), K9(iTRAQ4plex)                   | 1294.75517 |  |  | 3.31 | Expt1 |
| DLNTMAPGLTIQAVR            | 2 | 256355015                                                                                                               | N-Term(iTRAQ4plex), M5(Oxidation)                    | 1759.95391 |  |  | 3.31 | Expt1 |
| GTQGPPGATGFPGSAGR          | 1 | 86613790                                                                                                                | N-Term(iTRAQ4plex)                                   | 1658.83133 |  |  | 3.31 | Expt1 |
| ETICSQDER                  | 2 | 31542413                                                                                                                | N-Term(iTRAQ4plex), C4(Methylthio)                   | 1270.55303 |  |  | 3.31 | Expt1 |
| NLVCTDLFTR                 | 1 | 6681159                                                                                                                 | N-Term(iTRAQ4plex), C4(Methylthio)                   | 1371.69206 |  |  | 3.31 | Expt1 |
| AGVMALANLLQIQR             | 1 | 13386026                                                                                                                | N-Term(iTRAQ4plex)                                   | 1641.96575 |  |  | 3.30 | Expt1 |
| VPAGSAAVFPCCMASGYPTPAITWSK | 1 | 149253040;183979966                                                                                                     | N-Term(iTRAQ4plex), C11(Methylthio), K25(iTRAQ4plex) | 2843.41806 |  |  | 3.30 | Expt1 |
| SIPLAMAPVFEQK              | 1 | 8567340                                                                                                                 | N-Term(iTRAQ4plex), K13(iTRAQ4plex)                  | 1718.96903 |  |  | 3.30 | Expt1 |
| SICEVLDLER                 | 2 | 253795498                                                                                                               | N-Term(iTRAQ4plex), C3(Methylthio)                   | 1366.68535 |  |  | 3.29 | Expt1 |
| VAADFTTALK                 | 1 | 242332572                                                                                                               | N-Term(iTRAQ4plex), K10(iTRAQ4plex)                  | 1324.76958 |  |  | 3.29 | Expt1 |
| DLNAAEALQR                 | 1 | 55926127                                                                                                                | N-Term(iTRAQ4plex)                                   | 1244.66997 |  |  | 3.29 | Expt1 |
| GTNTGVVWVGSGSEASEALSR      | 1 | 93102409                                                                                                                | N-Term(iTRAQ4plex)                                   | 2208.10306 |  |  | 3.29 | Expt1 |
| TLINAEPPMIVVR              | 2 | 242332572                                                                                                               | N-Term(iTRAQ4plex), M10(Oxidation)                   | 1727.95342 |  |  | 3.29 | Expt1 |
| DFLLGAYQTEFFPEGPTQLMK      | 1 | 31982393                                                                                                                | N-Term(iTRAQ4plex), Q8(Deamidated), K21(iTRAQ4plex)  | 2703.37314 |  |  | 3.29 | Expt1 |
| LQQENSILR                  | 1 | 124486712                                                                                                               | N-Term(iTRAQ4plex)                                   | 1244.70928 |  |  | 3.29 | Expt1 |
| ALIDSGFAIK                 | 1 | 268607544                                                                                                               | N-Term(iTRAQ4plex), K10(iTRAQ4plex)                  | 1322.79241 |  |  | 3.29 | Expt1 |
| VMGPNFGYVTR                | 2 | 156938252                                                                                                               | N-Term(iTRAQ4plex)                                   | 1384.71953 |  |  | 3.28 | Expt1 |
| DPNTYFIVGTAMVYPEEAEPK      | 1 | 7657011                                                                                                                 | N-Term(iTRAQ4plex), K21(iTRAQ4plex)                  | 2659.32969 |  |  | 3.28 | Expt1 |

|                            |   |                                                                                                                         |                                                                     |            |  |  |  |      |       |
|----------------------------|---|-------------------------------------------------------------------------------------------------------------------------|---------------------------------------------------------------------|------------|--|--|--|------|-------|
| EMSVYEAYR                  | 2 | 256000745;256418964;254675117;254675195;254675201;254675251;254675253;254675259;254675119;254675244;254675265;254675115 | N-Term(iTRAQ4plex)                                                  | 1291.61308 |  |  |  | 3.28 | Expt1 |
| GILLQLFGGTR                | 1 | 255918149                                                                                                               | N-Term(iTRAQ4plex)                                                  | 1318.79924 |  |  |  | 3.28 | Expt1 |
| LLDELTFLEGVTR              | 1 | 170650630;170650632                                                                                                     | N-Term(iTRAQ4plex)                                                  | 1502.85759 |  |  |  | 3.28 | Expt1 |
| GCWILYEQPEFR               | 1 | 244790065                                                                                                               | N-Term(iTRAQ4plex), C2(Methylthio)                                  | 1730.82036 |  |  |  | 3.28 | Expt1 |
| ADYDTLSLR                  | 4 | 242332585;242332587                                                                                                     | N-Term(iTRAQ4plex)                                                  | 1197.62407 |  |  |  | 3.28 | Expt1 |
| DAQSSVLFVDTGQVR            | 2 | 239052674                                                                                                               | N-Term(iTRAQ4plex)                                                  | 1765.92185 |  |  |  | 3.28 | Expt1 |
| LYLQQGQLCEPLPSLDESR        | 1 | 31982089                                                                                                                | N-Term(iTRAQ4plex), C9(Methylthio)                                  | 2379.19150 |  |  |  | 3.28 | Expt1 |
| NIFSFLNR                   | 1 | 6753556                                                                                                                 | N-Term(iTRAQ4plex)                                                  | 1317.71123 |  |  |  | 3.27 | Expt1 |
| SVTQQPGSEVIAPQK            | 1 | 255069795                                                                                                               | N-Term(iTRAQ4plex), K15(iTRAQ4plex)                                 | 1857.04204 |  |  |  | 3.27 | Expt1 |
| NLAAFPASHDPDPAAVPTPTATPSAR | 1 | 114052416;114052522;114052442;114052104                                                                                 | N-Term(iTRAQ4plex)                                                  | 2716.38864 |  |  |  | 3.27 | Expt1 |
| TFTDCFNCLPIAAIVDEK         | 1 | 161484668;31980772;13994195;94392631                                                                                    | N-Term(iTRAQ4plex), C5(Methylthio), C8(Methylthio), K18(iTRAQ4plex) | 2380.13596 |  |  |  | 3.27 | Expt1 |
| LQELEGPSVSMQK              | 1 | 226423922                                                                                                               | N-Term(iTRAQ4plex), K14(iTRAQ4plex)                                 | 1847.02604 |  |  |  | 3.27 | Expt1 |
| FIIGESQAGEQPTQTVMGQVMR     | 1 | 269973917;269973915                                                                                                     | N-Term(iTRAQ4plex), M22(Oxidation)                                  | 2664.33469 |  |  |  | 3.27 | Expt1 |
| LAVGSVVESAFR               | 1 | 32526861                                                                                                                | N-Term(iTRAQ4plex)                                                  | 1378.78093 |  |  |  | 3.26 | Expt1 |
| IPAYFITVHDPVPPGEDPDGR      | 2 | 255069795                                                                                                               | N-Term(iTRAQ4plex)                                                  | 2507.27890 |  |  |  | 3.26 | Expt1 |
| ELLASYENR                  | 1 | 112421039                                                                                                               | N-Term(iTRAQ4plex)                                                  | 1238.65044 |  |  |  | 3.26 | Expt1 |
| EGYVPEEVPVYENK             | 1 | 283945598;283945600                                                                                                     | N-Term(iTRAQ4plex), K15(iTRAQ4plex)                                 | 2068.05429 |  |  |  | 3.26 | Expt1 |
| NPPQPSTTLPTTLQPK           | 1 | 161484644                                                                                                               | N-Term(iTRAQ4plex), K18(iTRAQ4plex)                                 | 2218.27237 |  |  |  | 3.25 | Expt1 |
| TLADAEGDVFR                | 1 | 19527258                                                                                                                | N-Term(iTRAQ4plex)                                                  | 1337.68242 |  |  |  | 3.25 | Expt1 |
| GPGQDQAALGALGK             | 1 | 255069795                                                                                                               | N-Term(iTRAQ4plex), K15(iTRAQ4plex)                                 | 1667.93938 |  |  |  | 3.25 | Expt1 |
| FAEFDQIMK                  | 1 | 261823961                                                                                                               | N-Term(iTRAQ4plex), K9(iTRAQ4plex)                                  | 1416.74932 |  |  |  | 3.25 | Expt1 |
| LSVYALQQR                  | 4 | 256000745;256418964;254675117;254675195;254675201;254675251;254675253;254675259;254675119;254675244;254675265;254675115 | N-Term(iTRAQ4plex)                                                  | 1194.69695 |  |  |  | 3.25 | Expt1 |
| AHNLQDQGQLSDTGDLGEDIASN    | 1 | 157823695;157823731;157823795;157823761                                                                                 | N-Term(iTRAQ4plex)                                                  | 2414.11979 |  |  |  | 3.25 | Expt1 |
| FVNWQVDGEYR                | 1 | 157909797                                                                                                               | N-Term(iTRAQ4plex)                                                  | 1556.76152 |  |  |  | 3.25 | Expt1 |
| AIAVLTSGGDAQGMNAAVR        | 1 | 254553346                                                                                                               | N-Term(iTRAQ4plex)                                                  | 1946.02349 |  |  |  | 3.25 | Expt1 |
| TELPVTENVQTIPIPPYVVR       | 1 | 268838948                                                                                                               | N-Term(iTRAQ4plex)                                                  | 2296.27439 |  |  |  | 3.25 | Expt1 |
| QFYINVER                   | 2 | 176865892;21450625;176866061;149270417;226823309;176865998                                                              | N-Term(iTRAQ4plex)                                                  | 1212.65044 |  |  |  | 3.25 | Expt1 |
| NVDLSTFYQNR                | 1 | 27552760                                                                                                                | N-Term(iTRAQ4plex)                                                  | 1500.75762 |  |  |  | 3.25 | Expt1 |
| AASSLLANLWQYSK             | 1 | 242332585;242332587                                                                                                     | N-Term(iTRAQ4plex), K14(iTRAQ4plex)                                 | 1840.02225 |  |  |  | 3.25 | Expt1 |
| FGAMLDMLTDR                | 1 | 21362277                                                                                                                | N-Term(iTRAQ4plex)                                                  | 1413.70134 |  |  |  | 3.25 | Expt1 |
| GGGQIIPSTAR                | 4 | 33859482;6755594;158508674                                                                                              | N-Term(iTRAQ4plex)                                                  | 1113.64958 |  |  |  | 3.24 | Expt1 |
| CGGIYQLSAIESR              | 1 | 261823961                                                                                                               | N-Term(iTRAQ4plex), C1(Methylthio)                                  | 1714.83916 |  |  |  | 3.24 | Expt1 |
| GLVEDTLR                   | 4 | 256000745;256418964;254675117;254675195;254675201;254675251;254675253;254675259;254675119;254675244;254675265;254675115 | N-Term(iTRAQ4plex)                                                  | 1046.59612 |  |  |  | 3.24 | Expt1 |
| ETVDQVEELR                 | 1 | 134288917                                                                                                               | N-Term(iTRAQ4plex)                                                  | 1361.70012 |  |  |  | 3.24 | Expt1 |
| LENLPDTQDQQTVDVNSVSEENENNR | 1 | 257467552;257467554                                                                                                     | N-Term(iTRAQ4plex)                                                  | 3131.43674 |  |  |  | 3.24 | Expt1 |
| EAQQLFLEPEVLDPESVELK       | 1 | 46048490                                                                                                                | N-Term(iTRAQ4plex), K20(iTRAQ4plex)                                 | 2601.39804 |  |  |  | 3.24 | Expt1 |
| QPTNDLFEIFEIER             | 1 | 73088940;71067128                                                                                                       | N-Term(iTRAQ4plex)                                                  | 1894.96855 |  |  |  | 3.24 | Expt1 |
| LQLEETMPSYGRR              | 2 | 34328148                                                                                                                | N-Term(iTRAQ4plex), Q2(Deamidated), M7(Oxidation)                   | 1837.94254 |  |  |  | 3.24 | Expt1 |
| GEFGDVMLGDYR               | 1 | 31560712                                                                                                                | N-Term(iTRAQ4plex)                                                  | 1502.70683 |  |  |  | 3.23 | Expt1 |
| IEDPNQFVPLNTNPTEVLEK       | 1 | 31542111;255759888;255759890                                                                                            | N-Term(iTRAQ4plex), K20(iTRAQ4plex)                                 | 2585.38034 |  |  |  | 3.23 | Expt1 |

|                       |   |                                                                                                                         |                                                      |            |  |  |  |      |       |
|-----------------------|---|-------------------------------------------------------------------------------------------------------------------------|------------------------------------------------------|------------|--|--|--|------|-------|
| LQLEACETR             | 2 | 256000745;256418964;254675117;254675195;254675201;254675251;254675253;254675259;254675119;254675244;254675265;254675115 | N-Term(iTRAQ4plex), C6(Methylthio)                   | 1252.61516 |  |  |  | 3.23 | Expt1 |
| GFIGPGIDVPAPDMSTGER   | 2 | 6680027                                                                                                                 | N-Term(iTRAQ4plex), M14(Oxidation)                   | 2076.02593 |  |  |  | 3.23 | Expt1 |
| AGTLSITEFADMLSGNAGGFR | 1 | 256000745;256418964;254675117;254675195;254675201;254675251;254675253;254675259;254675119;254675244;254675265;254675115 | N-Term(iTRAQ4plex), M12(Oxidation)                   | 2275.11765 |  |  |  | 3.23 | Expt1 |
| FPVTEAVNK             | 2 | 256000745;256418964;254675117;254675195;254675201;254675251;254675253;254675259;254675119;254675244;254675265;254675115 | N-Term(iTRAQ4plex), K9(iTRAQ4plex)                   | 1292.75273 |  |  |  | 3.23 | Expt1 |
| ENFSCLTR              | 7 | 254540027                                                                                                               | N-Term(iTRAQ4plex), C5(Methylthio)                   | 1159.53386 |  |  |  | 3.23 | Expt1 |
| LTPITYPQGLAMAK        | 2 | 45592934                                                                                                                | N-Term(iTRAQ4plex), K14(iTRAQ4plex)                  | 1792.02628 |  |  |  | 3.22 | Expt1 |
| AFQNVIAPR             | 1 | 29789239                                                                                                                | N-Term(iTRAQ4plex)                                   | 1159.66973 |  |  |  | 3.22 | Expt1 |
| DLLYFDGLR             | 4 | 242332585;242332587                                                                                                     | N-Term(iTRAQ4plex)                                   | 1255.68193 |  |  |  | 3.22 | Expt1 |
| QADYVPSDQDLLR         | 1 | 47271396;117959921;117959928;117959930                                                                                  | N-Term(iTRAQ4plex)                                   | 1663.83989 |  |  |  | 3.22 | Expt1 |
| FAPDFLFTPVDAASLPAPQGR | 1 | 119392105                                                                                                               | N-Term(iTRAQ4plex)                                   | 2290.21030 |  |  |  | 3.22 | Expt1 |
| EILEESLR              | 1 | 258547154;258547156;258547152                                                                                           | N-Term(iTRAQ4plex)                                   | 1132.63616 |  |  |  | 3.22 | Expt1 |
| NGYYLTLR              | 5 | 247300693                                                                                                               | N-Term(iTRAQ4plex), N1(Deamidated)                   | 1144.61479 |  |  |  | 3.22 | Expt1 |
| GVPLSGDQEITPELLPR     | 1 | 289191399                                                                                                               | N-Term(iTRAQ4plex)                                   | 1965.08054 |  |  |  | 3.22 | Expt1 |
| GYFDEDMNISLADPGDDTK   | 1 | 37537522                                                                                                                | N-Term(iTRAQ4plex), N8(Deamidated), K19(iTRAQ4plex)  | 2392.09897 |  |  |  | 3.21 | Expt1 |
| YADDSFTPAFVSTVGIDFK   | 1 | 6679593;261862303;15042957                                                                                              | N-Term(iTRAQ4plex), K19(iTRAQ4plex)                  | 2368.20847 |  |  |  | 3.21 | Expt1 |
| DAGTIAGLNVMR          | 1 | 254540166                                                                                                               | N-Term(iTRAQ4plex)                                   | 1361.73503 |  |  |  | 3.21 | Expt1 |
| LVTDEDVFPFK           | 1 | 20149310                                                                                                                | N-Term(iTRAQ4plex), K11(iTRAQ4plex)                  | 1551.84953 |  |  |  | 3.21 | Expt1 |
| EIIDLVLDL             | 1 | 6755901;34740335;6678469                                                                                                | N-Term(iTRAQ4plex)                                   | 1229.72136 |  |  |  | 3.21 | Expt1 |
| LQELSAEER             | 2 | 21313144                                                                                                                | N-Term(iTRAQ4plex)                                   | 1218.64519 |  |  |  | 3.20 | Expt1 |
| QEYLDTLR              | 2 | 45476573                                                                                                                | N-Term(iTRAQ4plex)                                   | 1344.69402 |  |  |  | 3.20 | Expt1 |
| YDYVLTGYTR            | 2 | 26006861                                                                                                                | N-Term(iTRAQ4plex)                                   | 1394.70903 |  |  |  | 3.20 | Expt1 |
| ELVIPLIQNGSR          | 1 | 125991228                                                                                                               | N-Term(iTRAQ4plex), N9(Deamidated)                   | 1483.86724 |  |  |  | 3.20 | Expt1 |
| IQAEEVAQLAR           | 2 | 261823961                                                                                                               | N-Term(iTRAQ4plex)                                   | 1371.77092 |  |  |  | 3.19 | Expt1 |
| SLDQFSDMR             | 1 | 157311641                                                                                                               | N-Term(iTRAQ4plex)                                   | 1242.59087 |  |  |  | 3.19 | Expt1 |
| AGAVDWTDQLGLR         | 1 | 124486923                                                                                                               | N-Term(iTRAQ4plex)                                   | 1545.81853 |  |  |  | 3.19 | Expt1 |
| FGEPIPIK              | 2 | 240120112                                                                                                               | N-Term(iTRAQ4plex), K9(iTRAQ4plex)                   | 1275.76714 |  |  |  | 3.19 | Expt1 |
| YGEPSEVFINR           | 1 | 225543409                                                                                                               | N-Term(iTRAQ4plex)                                   | 1454.74162 |  |  |  | 3.18 | Expt1 |
| WTQLLANSTR            | 1 | 115496850                                                                                                               | N-Term(iTRAQ4plex)                                   | 1404.77397 |  |  |  | 3.18 | Expt1 |
| SSPEPVALTESETEYVIR    | 1 | 8567338                                                                                                                 | N-Term(iTRAQ4plex)                                   | 2151.09665 |  |  |  | 3.18 | Expt1 |
| SYVDPSTDER            | 3 | 256000745;256418964;254675117;254675195;254675201;254675251;254675253;254675259;254675119;254675244;254675265;254675115 | N-Term(iTRAQ4plex)                                   | 1312.61833 |  |  |  | 3.18 | Expt1 |
| IISLETYNLFR           | 1 | 256000745;256418964;254675117;254675195;254675201;254675251;254675253;254675259;254675119;254675244;254675265;254675115 | N-Term(iTRAQ4plex)                                   | 1512.85820 |  |  |  | 3.18 | Expt1 |
| SQVINVIGNER           | 1 | 88853584                                                                                                                | N-Term(iTRAQ4plex)                                   | 1372.76616 |  |  |  | 3.18 | Expt1 |
| LTLQESSIPGLR          | 2 | 162417980                                                                                                               | N-Term(iTRAQ4plex)                                   | 1457.84978 |  |  |  | 3.18 | Expt1 |
| IEIESFFEGEDFSETLTR    | 1 | 254540166                                                                                                               | N-Term(iTRAQ4plex)                                   | 2293.10137 |  |  |  | 3.17 | Expt1 |
| ASSIVVSGTPIR          | 1 | 240120112                                                                                                               | N-Term(iTRAQ4plex)                                   | 1330.78093 |  |  |  | 3.17 | Expt1 |
| LIGEYGLR              | 3 | 33504483                                                                                                                | N-Term(iTRAQ4plex)                                   | 1064.62285 |  |  |  | 3.16 | Expt1 |
| FVFSLV DAMNGK         | 1 | 31982186                                                                                                                | N-Term(iTRAQ4plex), N10(Deamidated), K12(iTRAQ4plex) | 1616.87253 |  |  |  | 3.16 | Expt1 |

|                         |   |                                                                                                                         |                                                                                                     |            |  |  |  |      |       |
|-------------------------|---|-------------------------------------------------------------------------------------------------------------------------|-----------------------------------------------------------------------------------------------------|------------|--|--|--|------|-------|
| MLLDPMGGIVMTNDGNAILR    | 1 | 6753320                                                                                                                 | N-Term(iTRAQ4plex)                                                                                  | 2275.17881 |  |  |  | 3.16 | Expt1 |
| ALYTFEPR                | 1 | 22267440                                                                                                                | N-Term(iTRAQ4plex)                                                                                  | 1140.61833 |  |  |  | 3.16 | Expt1 |
| IDMYADGTQDLMMMAVAPFK    | 1 | 160298217                                                                                                               | N-Term(iTRAQ4plex), Q9(Deamidated), M12(Oxidation), M13(Oxidation), M14(Oxidation), K21(iTRAQ4plex) | 2698.29984 |  |  |  | 3.16 | Expt1 |
| NFASVQGVSLSEGSFSPYSAYR  | 2 | 111074529                                                                                                               | N-Term(iTRAQ4plex), Y21(iTRAQ4plex)                                                                 | 2641.31375 |  |  |  | 3.16 | Expt1 |
| VFSEVELSVNNMQSPPEVPITLK | 1 | 161016833                                                                                                               | N-Term(iTRAQ4plex), M12(Oxidation), K23(iTRAQ4plex)                                                 | 2893.51645 |  |  |  | 3.16 | Expt1 |
| WLAPDGLIFPDR            | 2 | 9790109                                                                                                                 | N-Term(iTRAQ4plex)                                                                                  | 1543.84087 |  |  |  | 3.16 | Expt1 |
| FLEEEAEK                | 1 | 256000745;256418964;254675117;254675195;254675201;254675251;254675253;254675259;254675119;254675244;254675265;254675115 | N-Term(iTRAQ4plex), K8(iTRAQ4plex)                                                                  | 1282.68657 |  |  |  | 3.16 | Expt1 |
| GLLSAEVAR               | 3 | 256000745;256418964;254675117;254675195;254675201;254675251;254675253;254675259;254675119;254675244;254675265;254675115 | N-Term(iTRAQ4plex)                                                                                  | 1059.62761 |  |  |  | 3.16 | Expt1 |
| RPSHPFPGTGRQGAR         | 3 | 31544072                                                                                                                | N-Term(iTRAQ4plex), Q12(Deamidated)                                                                 | 1765.92569 |  |  |  | 3.16 | Expt1 |
| LETTSNQDNLAPITAK        | 1 | 31982236                                                                                                                | N-Term(iTRAQ4plex), K16(iTRAQ4plex)                                                                 | 2004.08384 |  |  |  | 3.15 | Expt1 |
| CVLNEGMPIYR             | 1 | 94374716;149258138;6680297                                                                                              | N-Term(iTRAQ4plex), C1(Methylthio)                                                                  | 1484.71819 |  |  |  | 3.15 | Expt1 |
| MTVNESEQLVSCSMDDTVR     | 1 | 6755995                                                                                                                 | N-Term(iTRAQ4plex), M1(Oxidation), C12(Methylthio), M14(Oxidation)                                  | 2366.01340 |  |  |  | 3.15 | Expt1 |
| AQSYEYVYR               | 1 | 21313520                                                                                                                | N-Term(iTRAQ4plex)                                                                                  | 1322.65422 |  |  |  | 3.15 | Expt1 |
| IDLLES DR               | 3 | 149266012;214010170                                                                                                     | N-Term(iTRAQ4plex)                                                                                  | 1191.63640 |  |  |  | 3.15 | Expt1 |
| ALIESYQNLTR             | 1 | 116089343;116089341;116089345;116089351;116089347                                                                       | N-Term(iTRAQ4plex)                                                                                  | 1451.80046 |  |  |  | 3.14 | Expt1 |
| GTAGVVPVVPGEVEVK        | 1 | 21489933                                                                                                                | N-Term(iTRAQ4plex), K17(iTRAQ4plex)                                                                 | 1924.13651 |  |  |  | 3.14 | Expt1 |
| AFAAPPVDAPDR            | 1 | 254692991;254675240                                                                                                     | N-Term(iTRAQ4plex)                                                                                  | 1499.76055 |  |  |  | 3.14 | Expt1 |
| DGTYAVTYIPDK            | 1 | 145966915                                                                                                               | N-Term(iTRAQ4plex), K12(iTRAQ4plex)                                                                 | 1630.85954 |  |  |  | 3.14 | Expt1 |
| FDYIPVNTDDLNR           | 1 | 239787900                                                                                                               | N-Term(iTRAQ4plex)                                                                                  | 1822.91692 |  |  |  | 3.14 | Expt1 |
| VLEGM DVVR              | 2 | 71774133                                                                                                                | N-Term(iTRAQ4plex)                                                                                  | 1161.64385 |  |  |  | 3.13 | Expt1 |
| VSLDEALQR               | 2 | 256000745;256418964;254675117;254675195;254675201;254675251;254675253;254675259;254675119;254675244;254675265;254675115 | N-Term(iTRAQ4plex)                                                                                  | 1174.65593 |  |  |  | 3.13 | Expt1 |
| MTYIGEFTK               | 1 | 6678097;255759941                                                                                                       | N-Term(iTRAQ4plex), K10(iTRAQ4plex)                                                                 | 1490.82195 |  |  |  | 3.13 | Expt1 |
| EAI AELER               | 1 | 256000745;256418964;254675117;254675195;254675201;254675251;254675253;254675259;254675119;254675244;254675265;254675115 | N-Term(iTRAQ4plex)                                                                                  | 1074.59111 |  |  |  | 3.13 | Expt1 |
| VSTFPAGSFQAR            | 1 | 170014682;170014686                                                                                                     | N-Term(iTRAQ4plex)                                                                                  | 1411.74968 |  |  |  | 3.13 | Expt1 |
| VGEPVALSEER             | 1 | 268837785                                                                                                               | N-Term(iTRAQ4plex)                                                                                  | 1458.75981 |  |  |  | 3.13 | Expt1 |
| AVASLNTPFMPDPDVS PMK    | 1 | 31982393                                                                                                                | N-Term(iTRAQ4plex), K20(iTRAQ4plex)                                                                 | 2402.24045 |  |  |  | 3.13 | Expt1 |
| QLAEEDAAR               | 1 | 256000745;256418964;254675117;254675195;254675201;254675251;254675253;254675259;254675119;254675244;254675265;254675115 | N-Term(iTRAQ4plex)                                                                                  | 1146.58916 |  |  |  | 3.13 | Expt1 |
| TMTELEIDMNR             | 1 | 7305619                                                                                                                 | N-Term(iTRAQ4plex)                                                                                  | 1624.77886 |  |  |  | 3.12 | Expt1 |
| LSQLEGVNVER             | 1 | 13928670                                                                                                                | N-Term(iTRAQ4plex)                                                                                  | 1387.76897 |  |  |  | 3.12 | Expt1 |
| YIESPVLFLR              | 2 | 269954711                                                                                                               | N-Term(iTRAQ4plex)                                                                                  | 1380.80351 |  |  |  | 3.12 | Expt1 |
| EVSQPDWTPPPEVTL SLTK    | 1 | 86198316                                                                                                                | N-Term(iTRAQ4plex), K19(iTRAQ4plex)                                                                 | 2412.29825 |  |  |  | 3.12 | Expt1 |
| LQLETT ER               | 3 | 256000745;256418964;254675117;254675195;254675201;254675251;254675253;254675259;254675119;254675244;254675265;254675115 | N-Term(iTRAQ4plex)                                                                                  | 1133.62834 |  |  |  | 3.12 | Expt1 |

|                               |   |                                                                                                                         |                                                                     |            |  |  |  |      |       |
|-------------------------------|---|-------------------------------------------------------------------------------------------------------------------------|---------------------------------------------------------------------|------------|--|--|--|------|-------|
| VALEEVER                      | 3 | 256000745;256418964;254675117;254675195;254675201;254675251;254675253;254675259;254675119;254675244;254675265;254675115 | N-Term(iTRAQ4plex)                                                  | 1088.60637 |  |  |  | 3.12 | Expt1 |
| IYPVFGTYWDCNCR                | 1 | 270132817                                                                                                               | N-Term(iTRAQ4plex), C12(Methylthio)                                 | 1937.87773 |  |  |  | 3.12 | Expt1 |
| TFVLEVMGR                     | 1 | 9790051;31560653;254553346                                                                                              | N-Term(iTRAQ4plex)                                                  | 1195.66069 |  |  |  | 3.12 | Expt1 |
| SGEGEVSGLLR                   | 1 | 170295840                                                                                                               | N-Term(iTRAQ4plex)                                                  | 1247.67253 |  |  |  | 3.11 | Expt1 |
| VEGTPNDPNPNDPR                | 1 | 19526884                                                                                                                | N-Term(iTRAQ4plex)                                                  | 1665.79814 |  |  |  | 3.11 | Expt1 |
| EVFPTLAAK                     | 2 | 258547154;258547156                                                                                                     | N-Term(iTRAQ4plex), K9(iTRAQ4plex)                                  | 1263.74468 |  |  |  | 3.11 | Expt1 |
| FPDAGEDELK                    | 3 | 242332572                                                                                                               | N-Term(iTRAQ4plex), K11(iTRAQ4plex)                                 | 1521.80864 |  |  |  | 3.11 | Expt1 |
| TLQNILEVEK                    | 1 | 31560404                                                                                                                | N-Term(iTRAQ4plex), K10(iTRAQ4plex)                                 | 1474.86931 |  |  |  | 3.11 | Expt1 |
| LAAEQELIR                     | 6 | 256000745;256418964;254675117;254675195;254675201;254675251;254675253;254675259;254675119;254675244;254675265;254675115 | N-Term(iTRAQ4plex)                                                  | 1186.69097 |  |  |  | 3.11 | Expt1 |
| AILGPMMLDQPLDGVTTSLPSPEQLK    | 1 | 9790167                                                                                                                 | N-Term(iTRAQ4plex), M6(Oxidation), K26(iTRAQ4plex)                  | 3037.68180 |  |  |  | 3.11 | Expt1 |
| IEYTVYDR                      | 2 | 8394362                                                                                                                 | N-Term(iTRAQ4plex)                                                  | 1202.61955 |  |  |  | 3.10 | Expt1 |
| TDTDAELDLVSR                  | 1 | 261878543                                                                                                               | N-Term(iTRAQ4plex)                                                  | 1478.74687 |  |  |  | 3.10 | Expt1 |
| FGEGMQLAWNRR                  | 1 | 82950147;82950149;149264086                                                                                             | N-Term(iTRAQ4plex), M5(Oxidation)                                   | 1468.71257 |  |  |  | 3.09 | Expt1 |
| EGCTEVSLLR                    | 1 | 149270322;124487099                                                                                                     | N-Term(iTRAQ4plex), C3(Methylthio)                                  | 1296.64250 |  |  |  | 3.09 | Expt1 |
| ATCELPNQSFSLAGSSIR            | 1 | 226442740;67906175                                                                                                      | N-Term(iTRAQ4plex), C3(Methylthio)                                  | 2218.07938 |  |  |  | 3.09 | Expt1 |
| LLIQVGHPPMPTLGTNVLGR          | 2 | 9845273                                                                                                                 | N-Term(iTRAQ4plex)                                                  | 2386.34671 |  |  |  | 3.09 | Expt1 |
| DDGAAILVAVSNMVQK              | 1 | 229892318                                                                                                               | N-Term(iTRAQ4plex), K16(iTRAQ4plex)                                 | 1919.06137 |  |  |  | 3.08 | Expt1 |
| LFEFAGYDVLRR                  | 1 | 262118273                                                                                                               | N-Term(iTRAQ4plex)                                                  | 1473.78874 |  |  |  | 3.08 | Expt1 |
| LEALDANSR                     | 2 | 122939192;122939196;122939194;122939198                                                                                 | N-Term(iTRAQ4plex)                                                  | 1132.60747 |  |  |  | 3.08 | Expt1 |
| GLVEPVDVVDNADGTQTVNYVPSR      | 1 | 125347376                                                                                                               | N-Term(iTRAQ4plex)                                                  | 2688.36655 |  |  |  | 3.08 | Expt1 |
| MLTPPMGTVMQVVK                | 2 | 6678321                                                                                                                 | N-Term(iTRAQ4plex), M6(Oxidation), K14(iTRAQ4plex)                  | 1836.98600 |  |  |  | 3.08 | Expt1 |
| WSTDDVQINDISLQDYIAVK          | 1 | 254675270                                                                                                               | N-Term(iTRAQ4plex), K20(iTRAQ4plex)                                 | 2611.35935 |  |  |  | 3.07 | Expt1 |
| SAAAEAEAILQDAVSK              | 2 | 255308928                                                                                                               | N-Term(iTRAQ4plex), K16(iTRAQ4plex)                                 | 1862.01615 |  |  |  | 3.07 | Expt1 |
| QAEAEALRR                     | 2 | 256000745;256418964;254675117;254675195;254675201;254675251;254675253;254675259;254675119;254675244;254675265;254675115 | N-Term(iTRAQ4plex)                                                  | 1144.64751 |  |  |  | 3.07 | Expt1 |
| IITDVIGNPEEER                 | 1 | 194328771;194328773                                                                                                     | N-Term(iTRAQ4plex)                                                  | 1628.87090 |  |  |  | 3.07 | Expt1 |
| DGQILPVPNVVRR                 | 1 | 149253208;33239431                                                                                                      | N-Term(iTRAQ4plex)                                                  | 1549.92009 |  |  |  | 3.07 | Expt1 |
| LEAIEDDSGR                    | 1 | 84452155;31560313                                                                                                       | N-Term(iTRAQ4plex)                                                  | 1248.62370 |  |  |  | 3.06 | Expt1 |
| IGPEPTTDSFIAMHGPTGVPGNALVVDPR | 1 | 7106303                                                                                                                 | N-Term(iTRAQ4plex)                                                  | 3416.77365 |  |  |  | 3.06 | Expt1 |
| TQAPSYLQQNGVQNYMK             | 2 | 239051067;239051082                                                                                                     | N-Term(iTRAQ4plex), Q9(Deamidated), M16(Oxidation), K17(iTRAQ4plex) | 2276.09854 |  |  |  | 3.06 | Expt1 |
| EGGSAGLIPSQFLEEK              | 1 | 257900520;257900524                                                                                                     | N-Term(iTRAQ4plex), K16(iTRAQ4plex)                                 | 1950.04612 |  |  |  | 3.06 | Expt1 |
| LSSIEDPSGAFR                  | 1 | 113865981                                                                                                               | N-Term(iTRAQ4plex)                                                  | 1309.65105 |  |  |  | 3.06 | Expt1 |
| LPPGEYIVVPSTFEPNK             | 1 | 160333229                                                                                                               | N-Term(iTRAQ4plex), K17(iTRAQ4plex)                                 | 2175.19828 |  |  |  | 3.06 | Expt1 |
| LAAISEATR                     | 1 | 256000745;256418964;254675117;254675195;254675201;254675251;254675253;254675259;254675119;254675244;254675265;254675115 | N-Term(iTRAQ4plex)                                                  | 1075.62419 |  |  |  | 3.06 | Expt1 |
| YMLVPSQLYTETPEK               | 1 | 149255293;149255746;153945747;31982171                                                                                  | N-Term(iTRAQ4plex), K16(iTRAQ4plex)                                 | 2186.17636 |  |  |  | 3.06 | Expt1 |
| VACITEQVLTLVNK                | 1 | 282398108                                                                                                               | N-Term(iTRAQ4plex), C3(Methylthio), K14(iTRAQ4plex)                 | 1865.04874 |  |  |  | 3.06 | Expt1 |
| FSLVGIAGQDLNEGRR              | 1 | 31543113                                                                                                                | N-Term(iTRAQ4plex)                                                  | 1833.96758 |  |  |  | 3.06 | Expt1 |
| QSVLEGLGSR                    | 1 | 48526514;48525359                                                                                                       | N-Term(iTRAQ4plex)                                                  | 1189.66602 |  |  |  | 3.06 | Expt1 |
| VTSYGGELRR                    | 1 | 183979966                                                                                                               | N-Term(iTRAQ4plex)                                                  | 1125.60246 |  |  |  | 3.06 | Expt1 |
| FASCFYGPFR                    | 1 | 149252624;34328485                                                                                                      | N-Term(iTRAQ4plex), C4(Methylthio)                                  | 1384.63542 |  |  |  | 3.05 | Expt1 |

|                            |   |                                                                                                                         |                                                      |            |  |  |      |       |
|----------------------------|---|-------------------------------------------------------------------------------------------------------------------------|------------------------------------------------------|------------|--|--|------|-------|
| FVLLLETGDQAGITR            | 1 | 227116322;21746169                                                                                                      | N-Term(iTRAQ4plex)                                   | 1663.91960 |  |  | 3.05 | Expt1 |
| IVIVPSLNPDPGR              | 1 | 149262207;150378501                                                                                                     | N-Term(iTRAQ4plex)                                   | 1423.84258 |  |  | 3.05 | Expt1 |
| AGGPEGPWWLPR               | 1 | 269954711                                                                                                               | N-Term(iTRAQ4plex)                                   | 1377.74053 |  |  | 3.05 | Expt1 |
| QLEMSAEER                  | 2 | 256000745;256418964;254675117;254675195;254675201;254675251;254675253;254675259;254675119;254675244;254675265;254675115 | N-Term(iTRAQ4plex)                                   | 1307.63848 |  |  | 3.05 | Expt1 |
| LYEIGAGTSEVR               | 1 | 9789985                                                                                                                 | N-Term(iTRAQ4plex)                                   | 1438.76262 |  |  | 3.05 | Expt1 |
| MFFDAELSQMQTHVSDTSVLSMDNNR | 2 | 20911031                                                                                                                | N-Term(iTRAQ4plex), Q9(Deamidated), M23(Oxidation)   | 3263.49973 |  |  | 3.05 | Expt1 |
| SVAFFPPFSGR                | 1 | 46250738                                                                                                                | N-Term(iTRAQ4plex)                                   | 1305.70818 |  |  | 3.05 | Expt1 |
| YIIELNVR                   | 1 | 254553372                                                                                                               | N-Term(iTRAQ4plex)                                   | 1292.73589 |  |  | 3.05 | Expt1 |
| LTYTAEVSVPK                | 1 | 116734870                                                                                                               | N-Term(iTRAQ4plex), K11(iTRAQ4plex)                  | 1495.86101 |  |  | 3.04 | Expt1 |
| TTAQLIR                    | 3 | 160707894                                                                                                               | N-Term(iTRAQ4plex)                                   | 1045.64885 |  |  | 3.04 | Expt1 |
| EMPTNPIR                   | 3 | 134023662                                                                                                               | N-Term(iTRAQ4plex)                                   | 1198.63799 |  |  | 3.04 | Expt1 |
| IPIFSAAGLPHNEIAAQICR       | 2 | 19527064;19705578                                                                                                       | N-Term(iTRAQ4plex), C19(Methylthio)                  | 2311.22898 |  |  | 3.04 | Expt1 |
| ALLEEIER                   | 2 | 256000745;256418964;254675117;254675195;254675201;254675251;254675253;254675259;254675119;254675244;254675265;254675115 | N-Term(iTRAQ4plex)                                   | 1116.63896 |  |  | 3.04 | Expt1 |
| GETAVPGAPETLR              | 1 | 40254507                                                                                                                | N-Term(iTRAQ4plex)                                   | 1441.77495 |  |  | 3.03 | Expt1 |
| EFDALLINPR                 | 1 | 6753960                                                                                                                 | N-Term(iTRAQ4plex)                                   | 1331.74590 |  |  | 3.03 | Expt1 |
| VVFDVQR                    | 1 | 214010153                                                                                                               | N-Term(iTRAQ4plex)                                   | 1093.61138 |  |  | 3.03 | Expt1 |
| FQPQSPDFLDITNPK            | 1 | 257153392                                                                                                               | N-Term(iTRAQ4plex), K15(iTRAQ4plex)                  | 2035.07993 |  |  | 3.03 | Expt1 |
| ECSVPTLDR                  | 1 | 109627652                                                                                                               | N-Term(iTRAQ4plex), C2(Methylthio)                   | 1209.57268 |  |  | 3.03 | Expt1 |
| EQFVEFR                    | 1 | 6680840;41282022                                                                                                        | N-Term(iTRAQ4plex)                                   | 1098.57036 |  |  | 3.03 | Expt1 |
| AQQEVQLQALEPQVDYLR         | 1 | 169234940                                                                                                               | N-Term(iTRAQ4plex)                                   | 2144.15641 |  |  | 3.03 | Expt1 |
| MSDSPSLSPAPSQGPTTFR        | 3 | 31981372                                                                                                                | N-Term(iTRAQ4plex), Q14(Deamidated)                  | 2155.05869 |  |  | 3.03 | Expt1 |
| LEFGSFWEIIGEAAK            | 1 | 254587904;254587910                                                                                                     | N-Term(iTRAQ4plex), K15(iTRAQ4plex)                  | 1985.06101 |  |  | 3.03 | Expt1 |
| LSVLGAIYSVQQR              | 1 | 124286826                                                                                                               | N-Term(iTRAQ4plex), Q11(Deamidated)                  | 1516.89722 |  |  | 3.02 | Expt1 |
| LFEGNALLR                  | 1 | 33504483                                                                                                                | N-Term(iTRAQ4plex)                                   | 1176.68572 |  |  | 3.02 | Expt1 |
| DLPEYYELIR                 | 1 | 51593084;21313112                                                                                                       | N-Term(iTRAQ4plex)                                   | 1454.76604 |  |  | 3.02 | Expt1 |
| ITMIAEPLK                  | 1 | 6755594;158508674                                                                                                       | N-Term(iTRAQ4plex), K10(iTRAQ4plex)                  | 1432.83843 |  |  | 3.02 | Expt1 |
| APAVATVGSICDLNLK           | 1 | 145966915                                                                                                               | N-Term(iTRAQ4plex), C11(Methylthio), K16(iTRAQ4plex) | 1906.04276 |  |  | 3.02 | Expt1 |
| EEADEYVDIGALNGIFVLGR       | 1 | 29293809                                                                                                                | N-Term(iTRAQ4plex), N13(Deamidated)                  | 2325.17868 |  |  | 3.02 | Expt1 |
| ATIQDVLR                   | 1 | 163644277                                                                                                               | N-Term(iTRAQ4plex)                                   | 1059.62834 |  |  | 3.02 | Expt1 |
| LMADFQAGR                  | 1 | 256000745;256418964;254675117;254675195;254675201;254675251;254675253;254675259;254675119;254675244;254675265;254675115 | N-Term(iTRAQ4plex)                                   | 1152.59709 |  |  | 3.02 | Expt1 |
| EANELQQWITEK               | 1 | 115496850                                                                                                               | N-Term(iTRAQ4plex), K12(iTRAQ4plex)                  | 1776.94132 |  |  | 3.02 | Expt1 |
| VDQSILTGESVSVIK            | 1 | 6806903;158635979;36031132                                                                                              | N-Term(iTRAQ4plex), K15(iTRAQ4plex)                  | 1863.07505 |  |  | 3.02 | Expt1 |
| LLVSADDFGK                 | 1 | 244790233;244790299                                                                                                     | N-Term(iTRAQ4plex), K10(iTRAQ4plex)                  | 1352.76982 |  |  | 3.02 | Expt1 |
| GLEPSPAAVAALPPEVR          | 1 | 226823258                                                                                                               | N-Term(iTRAQ4plex)                                   | 1818.02927 |  |  | 3.02 | Expt1 |
| VDGMDILCVR                 | 1 | 6679261                                                                                                                 | N-Term(iTRAQ4plex), C8(Methylthio)                   | 1310.64189 |  |  | 3.02 | Expt1 |
| VNGMDILCVR                 | 1 | 6679263                                                                                                                 | N-Term(iTRAQ4plex), N2(Deamidated), C8(Methylthio)   | 1310.64189 |  |  | 3.02 | Expt1 |
| YYPEQEPQLLSGIGR            | 1 | 238637273                                                                                                               | N-Term(iTRAQ4plex)                                   | 1893.98284 |  |  | 3.01 | Expt1 |
| VQGSDEEVVVATTR             | 1 | 255069795                                                                                                               | N-Term(iTRAQ4plex)                                   | 1835.90911 |  |  | 3.01 | Expt1 |
| TLIQNCGASTIR               | 1 | 6753320                                                                                                                 | N-Term(iTRAQ4plex), C6(Methylthio)                   | 1466.75627 |  |  | 3.01 | Expt1 |
| IIMPPSALDQLSR              | 1 | 257153392                                                                                                               | N-Term(iTRAQ4plex)                                   | 1584.89409 |  |  | 3.01 | Expt1 |
| ALVQLEQFR                  | 1 | 110347473                                                                                                               | N-Term(iTRAQ4plex)                                   | 1375.78630 |  |  | 3.01 | Expt1 |
| TIVMGASFR                  | 3 | 33859640                                                                                                                | N-Term(iTRAQ4plex)                                   | 1125.61943 |  |  | 3.01 | Expt1 |
| VFADYEAYVK                 | 1 | 268836255                                                                                                               | N-Term(iTRAQ4plex), K10(iTRAQ4plex)                  | 1492.80046 |  |  | 3.01 | Expt1 |

|                       |   |                                                                                                                         |                                                                                     |            |  |  |  |      |       |
|-----------------------|---|-------------------------------------------------------------------------------------------------------------------------|-------------------------------------------------------------------------------------|------------|--|--|--|------|-------|
| AFCGFEDPR             | 2 | 256000745;256418964;254675117;254675195;254675201;254675251;254675253;254675259;254675119;254675244;254675265;254675115 | N-Term(iTRAQ4plex), C3(Methylthio)                                                  | 1231.53789 |  |  |  | 3.00 | Expt1 |
| ALQASALNAWR           | 1 | 60687506                                                                                                                | N-Term(iTRAQ4plex)                                                                  | 1344.75517 |  |  |  | 3.00 | Expt1 |
| VVPSDLYPLVLR          | 1 | 86198327;86198329;86198331;86198333                                                                                     | N-Term(iTRAQ4plex)                                                                  | 1514.91069 |  |  |  | 3.00 | Expt1 |
| QILSADLR              | 1 | 68226731                                                                                                                | N-Term(iTRAQ4plex)                                                                  | 1059.63017 |  |  |  | 3.00 | Expt1 |
| FDAMPFTLR             | 1 | 6755100                                                                                                                 | N-Term(iTRAQ4plex)                                                                  | 1241.65007 |  |  |  | 3.00 | Expt1 |
| DYVPPTANLDQK          | 1 | 77404392                                                                                                                | N-Term(iTRAQ4plex), K12(iTRAQ4plex)                                                 | 1648.88115 |  |  |  | 3.00 | Expt1 |
| ALGLSNFNSR            | 1 | 149252910;10946870                                                                                                      | N-Term(iTRAQ4plex)                                                                  | 1222.66692 |  |  |  | 2.99 | Expt1 |
| DDPSGQMLLLSDAR        | 1 | 256000745;256418964;254675117;254675195;254675201;254675251;254675253;254675259;254675119;254675244;254675265;254675115 | N-Term(iTRAQ4plex), M7(Oxidation)                                                   | 1790.91399 |  |  |  | 2.99 | Expt1 |
| GPLESPAYGPPGALGFPESSR | 1 | 124378050                                                                                                               | N-Term(iTRAQ4plex)                                                                  | 2430.24790 |  |  |  | 2.99 | Expt1 |
| EATNDPWGSPGQLMGEIAK   | 1 | 154240730                                                                                                               | N-Term(iTRAQ4plex), M15(Oxidation), K20(iTRAQ4plex)                                 | 2420.17215 |  |  |  | 2.99 | Expt1 |
| EAETLTQR              | 1 | 29336026                                                                                                                | N-Term(iTRAQ4plex)                                                                  | 1091.58220 |  |  |  | 2.99 | Expt1 |
| IYVGNLPPDIR           | 1 | 149262253;118582271                                                                                                     | N-Term(iTRAQ4plex)                                                                  | 1400.80339 |  |  |  | 2.99 | Expt1 |
| ETMQSLNDR             | 1 | 238231425                                                                                                               | N-Term(iTRAQ4plex)                                                                  | 1237.60210 |  |  |  | 2.99 | Expt1 |
| VGDVGPLGER            | 1 | 8393173                                                                                                                 | N-Term(iTRAQ4plex)                                                                  | 1142.62920 |  |  |  | 2.98 | Expt1 |
| YDWDLLAAR             | 1 | 6755594;158508674                                                                                                       | N-Term(iTRAQ4plex)                                                                  | 1266.66301 |  |  |  | 2.98 | Expt1 |
| EELEALR               | 1 | 112421039;134031980                                                                                                     | N-Term(iTRAQ4plex)                                                                  | 1003.55754 |  |  |  | 2.98 | Expt1 |
| DIDAFWLQR             | 1 | 40018610                                                                                                                | N-Term(iTRAQ4plex)                                                                  | 1307.68511 |  |  |  | 2.98 | Expt1 |
| LEENMTEVVR            | 1 | 88758582;88758584                                                                                                       | N-Term(iTRAQ4plex)                                                                  | 1347.74504 |  |  |  | 2.98 | Expt1 |
| EAGVQIAGR             | 1 | 261878543                                                                                                               | N-Term(iTRAQ4plex)                                                                  | 1044.59368 |  |  |  | 2.98 | Expt1 |
| AQPSVSLGAPYR          | 1 | 86262142                                                                                                                | N-Term(iTRAQ4plex)                                                                  | 1389.76311 |  |  |  | 2.98 | Expt1 |
| QFLEVELDQAR           | 1 | 254675300                                                                                                               | N-Term(iTRAQ4plex)                                                                  | 1491.79436 |  |  |  | 2.98 | Expt1 |
| GYFNEELSEILSDPSDDTK   | 1 | 82950147;82950149;149264086                                                                                             | N-Term(iTRAQ4plex), N4(Deamidated), K19(iTRAQ4plex)                                 | 2448.18326 |  |  |  | 2.98 | Expt1 |
| EAIQATAR              | 1 | 161016822;161016820                                                                                                     | N-Term(iTRAQ4plex)                                                                  | 1003.56584 |  |  |  | 2.98 | Expt1 |
| ADVDLYQVR             | 1 | 119508441                                                                                                               | N-Term(iTRAQ4plex)                                                                  | 1222.65581 |  |  |  | 2.97 | Expt1 |
| VFQVEYAMK             | 1 | 261824000                                                                                                               | N-Term(iTRAQ4plex), K9(iTRAQ4plex)                                                  | 1402.76116 |  |  |  | 2.97 | Expt1 |
| GFGFVTFADPASVDK       | 1 | 17157989;149262368                                                                                                      | N-Term(iTRAQ4plex), K15(iTRAQ4plex)                                                 | 1845.96622 |  |  |  | 2.97 | Expt1 |
| TQVCGILR              | 3 | 227330582;6996917                                                                                                       | N-Term(iTRAQ4plex), C4(Methylthio)                                                  | 1079.58342 |  |  |  | 2.97 | Expt1 |
| EVDYSGLR              | 1 | 28202071;197313683;28461294                                                                                             | N-Term(iTRAQ4plex)                                                                  | 1082.56059 |  |  |  | 2.97 | Expt1 |
| GTGIPFER              | 1 | 31543120                                                                                                                | N-Term(iTRAQ4plex)                                                                  | 1020.55791 |  |  |  | 2.97 | Expt1 |
| SFNTVPYIVGFNK         | 1 | 247269929                                                                                                               | N-Term(iTRAQ4plex), K13(iTRAQ4plex)                                                 | 1773.98252 |  |  |  | 2.97 | Expt1 |
| IAPLAEGALPYNLAEIQR    | 1 | 27369581                                                                                                                | N-Term(iTRAQ4plex)                                                                  | 2083.17148 |  |  |  | 2.97 | Expt1 |
| LLWENGLLR             | 1 | 126518317                                                                                                               | N-Term(iTRAQ4plex), N5(Deamidated)                                                  | 1372.77495 |  |  |  | 2.96 | Expt1 |
| ELYIEEALQNER          | 1 | 158854020;158854022                                                                                                     | N-Term(iTRAQ4plex)                                                                  | 1650.84770 |  |  |  | 2.96 | Expt1 |
| DAGHPLYPFNDPY         | 1 | 149252910;10946870                                                                                                      | N-Term(iTRAQ4plex)                                                                  | 1649.77373 |  |  |  | 2.96 | Expt1 |
| AIASNIMYIVGQYPR       | 1 | 38604071                                                                                                                | N-Term(iTRAQ4plex), M8(Oxidation)                                                   | 1969.06638 |  |  |  | 2.96 | Expt1 |
| GSQAMITEEPDGAPLACDK   | 1 | 124249220                                                                                                               | N-Term(iTRAQ4plex), Q3(Deamidated), M5(Oxidation), C17(Methylthio), K19(iTRAQ4plex) | 2284.02335 |  |  |  | 2.96 | Expt1 |
| AAIDAGYR              | 1 | 160415215;6679791                                                                                                       | N-Term(iTRAQ4plex)                                                                  | 980.52928  |  |  |  | 2.96 | Expt1 |
| NLFFSTNIDDAIR         | 1 | 6678499                                                                                                                 | N-Term(iTRAQ4plex)                                                                  | 1669.87114 |  |  |  | 2.95 | Expt1 |
| TGMILLAGEITSR         | 1 | 21704144                                                                                                                | N-Term(iTRAQ4plex), M3(Oxidation)                                                   | 1521.84612 |  |  |  | 2.95 | Expt1 |
| SATVSPQQPQAQQR        | 1 | 78000177;78000175;78000173;78000179;78000154                                                                            | N-Term(iTRAQ4plex)                                                                  | 1669.88017 |  |  |  | 2.95 | Expt1 |
| DGSDVIYPAR            | 2 | 9055242                                                                                                                 | N-Term(iTRAQ4plex)                                                                  | 1236.63469 |  |  |  | 2.95 | Expt1 |
| LALDIEIATYR           | 1 | 47059013;14861854;31980832;269914154;84000448;196115327                                                                 | N-Term(iTRAQ4plex)                                                                  | 1421.81597 |  |  |  | 2.95 | Expt1 |
| ILATGICR              | 3 | 31560625                                                                                                                | N-Term(iTRAQ4plex), C7(Methylthio)                                                  | 1036.57561 |  |  |  | 2.95 | Expt1 |
| AFDSGIIPMEFVNK        | 1 | 29293809                                                                                                                | N-Term(iTRAQ4plex), M9(Oxidation), K14(iTRAQ4plex)                                  | 1871.98771 |  |  |  | 2.95 | Expt1 |

|                          |   |                                                                                                                         |                                                     |            |  |  |      |       |
|--------------------------|---|-------------------------------------------------------------------------------------------------------------------------|-----------------------------------------------------|------------|--|--|------|-------|
| AATSPALFNR               | 1 | 134288917                                                                                                               | N-Term(iTRAQ4plex)                                  | 1191.65923 |  |  | 2.95 | Expt1 |
| GTPLDTEVPLER             | 1 | 251823978;251823980                                                                                                     | N-Term(iTRAQ4plex)                                  | 1470.79411 |  |  | 2.95 | Expt1 |
| NFVDPITK                 | 1 | 82950147;82950149;149264086                                                                                             | N-Term(iTRAQ4plex), K8(iTRAQ4plex)                  | 1221.71831 |  |  | 2.94 | Expt1 |
| ATVLTTER                 | 1 | 19527358                                                                                                                | N-Term(iTRAQ4plex)                                  | 1034.59599 |  |  | 2.94 | Expt1 |
| AELELELGR                | 3 | 256000745;256418964;254675117;254675195;254675201;254675251;254675253;254675259;254675119;254675244;254675265;254675115 | N-Term(iTRAQ4plex)                                  | 1173.66057 |  |  | 2.94 | Expt1 |
| AELGEYIR                 | 1 | 134288917                                                                                                               | N-Term(iTRAQ4plex)                                  | 1094.59380 |  |  | 2.94 | Expt1 |
| ASLLDDYQLPEILR           | 2 | 240848573                                                                                                               | N-Term(iTRAQ4plex)                                  | 1789.98870 |  |  | 2.94 | Expt1 |
| SLTELQELEAVYER           | 1 | 19527194                                                                                                                | N-Term(iTRAQ4plex)                                  | 1823.95256 |  |  | 2.94 | Expt1 |
| FASFINK                  | 2 | 282398110                                                                                                               | N-Term(iTRAQ4plex), N6(Deamidated), K7(iTRAQ4plex)  | 1115.64226 |  |  | 2.94 | Expt1 |
| GILDALLQTAR              | 1 | 21312550                                                                                                                | N-Term(iTRAQ4plex)                                  | 1314.78935 |  |  | 2.94 | Expt1 |
| QLAEGTAQQR               | 1 | 256000745;256418964;254675117;254675195;254675201;254675251;254675253;254675259;254675119;254675244;254675265;254675115 | N-Term(iTRAQ4plex)                                  | 1245.66997 |  |  | 2.94 | Expt1 |
| EDVAQYIER                | 1 | 33413404                                                                                                                | N-Term(iTRAQ4plex)                                  | 1266.64348 |  |  | 2.93 | Expt1 |
| AFSYYGPLR                | 1 | 22122585                                                                                                                | N-Term(iTRAQ4plex)                                  | 1217.64568 |  |  | 2.93 | Expt1 |
| GSIPTSLTALSLASAPPLSGR    | 1 | 221554491                                                                                                               | N-Term(iTRAQ4plex)                                  | 2227.22000 |  |  | 2.93 | Expt1 |
| QYYDGSEIVVAGR            | 1 | 124249351                                                                                                               | N-Term(iTRAQ4plex)                                  | 1600.81120 |  |  | 2.92 | Expt1 |
| VTQLLER                  | 1 | 256000745;256418964;254675117;254675195;254675201;254675251;254675253;254675259;254675119;254675244;254675265;254675115 | N-Term(iTRAQ4plex)                                  | 1002.60692 |  |  | 2.92 | Expt1 |
| TWNPSPVQQDIK             | 1 | 254540166                                                                                                               | N-Term(iTRAQ4plex), K12(iTRAQ4plex)                 | 1718.90032 |  |  | 2.92 | Expt1 |
| SMVLGYWDIR               | 1 | 6754086                                                                                                                 | N-Term(iTRAQ4plex)                                  | 1383.72270 |  |  | 2.92 | Expt1 |
| FQETFEDVFSR              | 1 | 6680624                                                                                                                 | N-Term(iTRAQ4plex)                                  | 1663.77568 |  |  | 2.92 | Expt1 |
| FETEQLR                  | 1 | 21489935                                                                                                                | N-Term(iTRAQ4plex)                                  | 1153.59844 |  |  | 2.92 | Expt1 |
| VPEANSSWMDTVIR           | 1 | 257796245                                                                                                               | N-Term(iTRAQ4plex)                                  | 1748.87969 |  |  | 2.92 | Expt1 |
| WAWDQEEER                | 1 | 157311641                                                                                                               | N-Term(iTRAQ4plex)                                  | 1392.63078 |  |  | 2.92 | Expt1 |
| LGTVPQFPR                | 1 | 149253040;183979966                                                                                                     | N-Term(iTRAQ4plex)                                  | 1158.67595 |  |  | 2.92 | Expt1 |
| VVELTQGLR                | 1 | 6677869                                                                                                                 | N-Term(iTRAQ4plex)                                  | 1158.69890 |  |  | 2.92 | Expt1 |
| IPAGTTLTLDMLTVK          | 1 | 16716467                                                                                                                | N-Term(iTRAQ4plex), K15(iTRAQ4plex)                 | 1862.10752 |  |  | 2.92 | Expt1 |
| TGQEIPVNLNLR             | 1 | 31981273                                                                                                                | N-Term(iTRAQ4plex)                                  | 1270.72161 |  |  | 2.91 | Expt1 |
| INFDSNSAYR               | 1 | 46849708                                                                                                                | N-Term(iTRAQ4plex)                                  | 1330.64971 |  |  | 2.91 | Expt1 |
| LQAEAEER                 | 1 | 256000745;256418964;254675117;254675195;254675201;254675251;254675253;254675259;254675119;254675244;254675265;254675115 | N-Term(iTRAQ4plex)                                  | 1089.56487 |  |  | 2.91 | Expt1 |
| FELTGIPPAPR              | 1 | 31981690                                                                                                                | N-Term(iTRAQ4plex)                                  | 1341.76775 |  |  | 2.91 | Expt1 |
| GVSAVVVGADR              | 2 | 268838020                                                                                                               | N-Term(iTRAQ4plex)                                  | 1173.67327 |  |  | 2.91 | Expt1 |
| QNLQLETR                 | 1 | 112421039                                                                                                               | N-Term(iTRAQ4plex)                                  | 1145.64202 |  |  | 2.91 | Expt1 |
| QPEYLDATGGTLHPYQMEGLNWLR | 1 | 39204553                                                                                                                | N-Term(iTRAQ4plex)                                  | 2933.44425 |  |  | 2.91 | Expt1 |
| ELSDIALR                 | 1 | 60687506                                                                                                                | N-Term(iTRAQ4plex)                                  | 1060.61284 |  |  | 2.90 | Expt1 |
| VTGEEWLVLR               | 1 | 239052674                                                                                                               | N-Term(iTRAQ4plex)                                  | 1232.67766 |  |  | 2.90 | Expt1 |
| MSGGSLIPSPNQALSPQPSR     | 1 | 21450263                                                                                                                | N-Term(iTRAQ4plex)                                  | 2296.18924 |  |  | 2.90 | Expt1 |
| SSISGTEEEVFPPTDEQK       | 1 | 157823829;157823865                                                                                                     | N-Term(iTRAQ4plex), K19(iTRAQ4plex)                 | 2397.15671 |  |  | 2.90 | Expt1 |
| TICAIENYQAEK             | 1 | 33468931                                                                                                                | N-Term(iTRAQ4plex), C3(Methylthio), K13(iTRAQ4plex) | 1829.94431 |  |  | 2.90 | Expt1 |
| LLGIFENQDR               | 1 | 169808397                                                                                                               | N-Term(iTRAQ4plex)                                  | 1348.73406 |  |  | 2.90 | Expt1 |
| SLVHDVIELLYLNGLR         | 1 | 148298663                                                                                                               | N-Term(iTRAQ4plex), N13(Deamidated)                 | 1999.11582 |  |  | 2.90 | Expt1 |
| AGLSQSLFER               | 1 | 170784813;170784811                                                                                                     | N-Term(iTRAQ4plex)                                  | 1251.68291 |  |  | 2.90 | Expt1 |
| LQESLPILQQPTEK           | 1 | 13385312;149269386                                                                                                      | N-Term(iTRAQ4plex), K14(iTRAQ4plex)                 | 1912.10648 |  |  | 2.90 | Expt1 |



|                               |   |                                                                                                                         |                                                                      |            |  |  |      |       |
|-------------------------------|---|-------------------------------------------------------------------------------------------------------------------------|----------------------------------------------------------------------|------------|--|--|------|-------|
| GDLNDCFIPCTPK                 | 1 | 261878543                                                                                                               | N-Term(iTRAQ4plex), C6(Methylthio), C10(Methylthio), K13(iTRAQ4plex) | 1802.82244 |  |  | 2.90 | Expt1 |
| TGPAATTLSDTAAAESLVDSSVTVIGFFK | 1 | 42415475                                                                                                                | N-Term(iTRAQ4plex), K30(iTRAQ4plex)                                  | 3273.70676 |  |  | 2.90 | Expt1 |
| IEYDCELVPR                    | 2 | 149253208;33239431                                                                                                      | N-Term(iTRAQ4plex), C5(Methylthio)                                   | 1426.68376 |  |  | 2.89 | Expt1 |
| YVAVMPPHIGDQPLTGAYTVTLDR      | 1 | 21450325                                                                                                                | N-Term(iTRAQ4plex)                                                   | 2815.46390 |  |  | 2.89 | Expt1 |
| DVLGMQVLR                     | 1 | 255003777                                                                                                               | N-Term(iTRAQ4plex)                                                   | 1174.67583 |  |  | 2.89 | Expt1 |
| LDANIVEVAVEGPEGK              | 1 | 61743961                                                                                                                | N-Term(iTRAQ4plex), N4(Deamidated), K16(iTRAQ4plex)                  | 1927.04605 |  |  | 2.89 | Expt1 |
| SEITELR                       | 1 | 112983636                                                                                                               | N-Term(iTRAQ4plex)                                                   | 991.55565  |  |  | 2.89 | Expt1 |
| LNVEVDAAPTVDLNR               | 1 | 145966692;13386238;160333504;254553305                                                                                  | N-Term(iTRAQ4plex)                                                   | 1769.95452 |  |  | 2.89 | Expt1 |
| LAYVTPTIPR                    | 1 | 95772123                                                                                                                | N-Term(iTRAQ4plex)                                                   | 1274.76042 |  |  | 2.89 | Expt1 |
| MEDFLLSNGYQLGK                | 1 | 21426825                                                                                                                | N-Term(iTRAQ4plex), N8(Deamidated), K14(iTRAQ4plex)                  | 1903.97568 |  |  | 2.89 | Expt1 |
| FFPASADR                      | 1 | 42415475                                                                                                                | N-Term(iTRAQ4plex)                                                   | 1054.54448 |  |  | 2.89 | Expt1 |
| HFTQVEFYQGSVLNPHDLAR          | 1 | 111607492                                                                                                               | N-Term(iTRAQ4plex), Q4(Deamidated), Q9(Deamidated), N14(Deamidated)  | 2505.21988 |  |  | 2.89 | Expt1 |
| EALENANTNTEVLK                | 1 | 149250318;28077049                                                                                                      | N-Term(iTRAQ4plex), N5(Deamidated), K14(iTRAQ4plex)                  | 1834.97099 |  |  | 2.89 | Expt1 |
| ADQVDTQQLMR                   | 1 | 31981592                                                                                                                | N-Term(iTRAQ4plex)                                                   | 1448.72966 |  |  | 2.89 | Expt1 |
| AVEVYSSAFQTLNFDLER            | 1 | 283806727                                                                                                               | N-Term(iTRAQ4plex), Q10(Deamidated)                                  | 2379.16587 |  |  | 2.89 | Expt1 |
| AVEGCVSASQAATEDGQLLR          | 1 | 227116327                                                                                                               | N-Term(iTRAQ4plex), C5(Methylthio)                                   | 2195.05844 |  |  | 2.89 | Expt1 |
| SLFSSAENEPVPLVGNWRPPQPVK      | 1 | 31982861                                                                                                                | N-Term(iTRAQ4plex), K25(iTRAQ4plex)                                  | 3033.64670 |  |  | 2.89 | Expt1 |
| DVNYTQIVVDR                   | 1 | 49274623                                                                                                                | N-Term(iTRAQ4plex), N3(Deamidated), Y4(iTRAQ4plex), Q6(Deamidated)   | 1611.83036 |  |  | 2.88 | Expt1 |
| AAELEVQR                      | 1 | 112421039                                                                                                               | N-Term(iTRAQ4plex)                                                   | 1059.59465 |  |  | 2.88 | Expt1 |
| VIESPPDQWEAR                  | 1 | 149254348;112807186                                                                                                     | N-Term(iTRAQ4plex)                                                   | 1657.83940 |  |  | 2.88 | Expt1 |
| GELGQFYR                      | 1 | 226531047;226531069                                                                                                     | N-Term(iTRAQ4plex)                                                   | 1113.58074 |  |  | 2.88 | Expt1 |
| SQDLLTSLTK                    | 1 | 124001560                                                                                                               | N-Term(iTRAQ4plex), K10(iTRAQ4plex)                                  | 1393.81011 |  |  | 2.88 | Expt1 |
| SWSLVTFR                      | 1 | 256000745;256418964;254675117;254675195;254675201;254675251;254675253;254675259;254675119;254675244;254675265;254675115 | N-Term(iTRAQ4plex)                                                   | 1139.63689 |  |  | 2.87 | Expt1 |
| LGLQSLR                       | 1 | 6680720                                                                                                                 | N-Term(iTRAQ4plex)                                                   | 930.58647  |  |  | 2.87 | Expt1 |
| WTELLQGPSAATR                 | 1 | 10946800                                                                                                                | N-Term(iTRAQ4plex)                                                   | 1573.85076 |  |  | 2.87 | Expt1 |
| DGNALTPPPTTPEWVK              | 1 | 21450277;30409956;21450321                                                                                              | N-Term(iTRAQ4plex), K17(iTRAQ4plex)                                  | 2108.12656 |  |  | 2.87 | Expt1 |
| QQISLATQMVR                   | 1 | 6671702                                                                                                                 | N-Term(iTRAQ4plex)                                                   | 1418.79228 |  |  | 2.87 | Expt1 |
| LEALAEER                      | 1 | 55926127                                                                                                                | N-Term(iTRAQ4plex)                                                   | 1074.59270 |  |  | 2.87 | Expt1 |
| YTQELTLNR                     | 1 | 31982236                                                                                                                | N-Term(iTRAQ4plex)                                                   | 1281.69292 |  |  | 2.87 | Expt1 |
| IILLAEGR                      | 2 | 262263372                                                                                                               | N-Term(iTRAQ4plex)                                                   | 1028.65874 |  |  | 2.87 | Expt1 |
| EDQAMSAIQDLQR                 | 1 | 190610029                                                                                                               | N-Term(iTRAQ4plex)                                                   | 1648.80998 |  |  | 2.87 | Expt1 |
| YYQADQLVQR                    | 1 | 111154082;111154076                                                                                                     | N-Term(iTRAQ4plex)                                                   | 1427.73967 |  |  | 2.87 | Expt1 |
| YDPTIEDFYR                    | 1 | 13386338;149271321;40254160                                                                                             | N-Term(iTRAQ4plex)                                                   | 1462.70061 |  |  | 2.87 | Expt1 |
| TLMSPLGITR                    | 1 | 6678085;6678083;76881807;6678079                                                                                        | N-Term(iTRAQ4plex), M3(Oxidation)                                    | 1248.71099 |  |  | 2.86 | Expt1 |
| SPLDSTAEPVAVR                 | 1 | 269954698;269954700                                                                                                     | N-Term(iTRAQ4plex)                                                   | 1483.78716 |  |  | 2.86 | Expt1 |
| LMSINYLGSVYPSR                | 1 | 110625780                                                                                                               | N-Term(iTRAQ4plex)                                                   | 1743.92912 |  |  | 2.86 | Expt1 |
| TVLPPDGPR                     | 1 | 20330802                                                                                                                | N-Term(iTRAQ4plex)                                                   | 1095.62895 |  |  | 2.86 | Expt1 |
| VEYIIPGSTTNPEVFR              | 1 | 61098143                                                                                                                | N-Term(iTRAQ4plex)                                                   | 2016.02324 |  |  | 2.86 | Expt1 |
| TLENLTPDTK                    | 1 | 111074529                                                                                                               | N-Term(iTRAQ4plex), K10(iTRAQ4plex)                                  | 1419.80170 |  |  | 2.86 | Expt1 |
| ATVLYQGMR                     | 1 | 160358825                                                                                                               | N-Term(iTRAQ4plex)                                                   | 1182.64519 |  |  | 2.86 | Expt1 |
| FAEGEATLR                     | 1 | 269954677;269954679                                                                                                     | N-Term(iTRAQ4plex)                                                   | 1137.60222 |  |  | 2.86 | Expt1 |
| LEAPLEELR                     | 1 | 134053913                                                                                                               | N-Term(iTRAQ4plex)                                                   | 1213.69072 |  |  | 2.86 | Expt1 |
| SQEGDSISVVGR                  | 1 | 149262207;150378501                                                                                                     | N-Term(iTRAQ4plex)                                                   | 1377.71404 |  |  | 2.86 | Expt1 |
| VVFFANQIPVYEQQATVFSR          | 1 | 153945886                                                                                                               | N-Term(iTRAQ4plex)                                                   | 2487.32755 |  |  | 2.86 | Expt1 |
| GVAPLWMR                      | 1 | 149258501;19526818                                                                                                      | N-Term(iTRAQ4plex)                                                   | 1073.60649 |  |  | 2.86 | Expt1 |
| ELLQTPNFR                     | 1 | 257467604                                                                                                               | N-Term(iTRAQ4plex)                                                   | 1261.70134 |  |  | 2.86 | Expt1 |
| LYNSQTANPGERPVFHSQN           | 1 | 149252883                                                                                                               | N-Term(iTRAQ4plex)                                                   | 2303.13297 |  |  | 2.86 | Expt1 |

|                                      |     |                                                                                                                                                                                    |                                                                      |            |     |     |      |       |       |
|--------------------------------------|-----|------------------------------------------------------------------------------------------------------------------------------------------------------------------------------------|----------------------------------------------------------------------|------------|-----|-----|------|-------|-------|
| AISEPNFSVAYANMCR                     | 1   | 56699432;56699434                                                                                                                                                                  | N-Term(iTRAQ4plex), C15(Methylthio)                                  | 1962.90886 |     |     |      | 2.85  | Expt1 |
| ATVLESEGTR                           | 1   | 12963591                                                                                                                                                                           | N-Term(iTRAQ4plex)                                                   | 1206.64202 |     |     |      | 2.85  | Expt1 |
| YFGDIISVGQR                          | 1   | 31541909                                                                                                                                                                           | N-Term(iTRAQ4plex)                                                   | 1398.75237 |     |     |      | 2.85  | Expt1 |
| TTIFSPGFR                            | 1   | 6755196                                                                                                                                                                            | N-Term(iTRAQ4plex)                                                   | 1151.61943 |     |     |      | 2.85  | Expt1 |
| VGDLYSDLR                            | 1   | 55926127                                                                                                                                                                           | N-Term(iTRAQ4plex)                                                   | 1181.63091 |     |     |      | 2.85  | Expt1 |
| VPPFNSSGEPGNPVLVAESSK                | 1   | 225690566                                                                                                                                                                          | N-Term(iTRAQ4plex), K22(iTRAQ4plex)                                  | 2497.32712 |     |     |      | 2.85  | Expt1 |
| TICITETIK                            | 1   | 118197277                                                                                                                                                                          | N-Term(iTRAQ4plex), C3(Methylthio), K8(iTRAQ4plex)                   | 1254.70171 |     |     |      | 2.84  | Expt1 |
| ANVTVLDTQIR                          | 1   | 149270772;149270774;153791796                                                                                                                                                      | N-Term(iTRAQ4plex)                                                   | 1373.79119 |     |     |      | 2.84  | Expt1 |
| ALVDSLSAR                            | 1   | 31982089                                                                                                                                                                           | N-Term(iTRAQ4plex)                                                   | 1075.62370 |     |     |      | 2.84  | Expt1 |
| GLNSVATAR                            | 1   | 6753762                                                                                                                                                                            | N-Term(iTRAQ4plex)                                                   | 1032.59514 |     |     |      | 2.84  | Expt1 |
| DEMFTLSR                             | 1   | 29336026                                                                                                                                                                           | N-Term(iTRAQ4plex)                                                   | 1142.56548 |     |     |      | 2.84  | Expt1 |
| DDFLGQVDVPLPLPTENPR                  | 1   | 56699423                                                                                                                                                                           | N-Term(iTRAQ4plex), Q6(Deamidated)                                   | 2430.25669 |     |     |      | 2.84  | Expt1 |
| QAIGIALETR                           | 1   | 74315975                                                                                                                                                                           | N-Term(iTRAQ4plex)                                                   | 1215.71904 |     |     |      | 2.84  | Expt1 |
| VFCIGPVFR                            | 1   | 211065507                                                                                                                                                                          | N-Term(iTRAQ4plex), C3(Methylthio)                                   | 1227.65007 |     |     |      | 2.84  | Expt1 |
| TPASINATPANINLADLTR                  | 1   | 166091434                                                                                                                                                                          | N-Term(iTRAQ4plex)                                                   | 2097.14774 |     |     |      | 2.84  | Expt1 |
| MALLMAEMSR                           | 1   | 31543942                                                                                                                                                                           | N-Term(iTRAQ4plex)                                                   | 1296.66179 |     |     |      | 2.84  | Expt1 |
| DEDITEYQSILAAVK                      | 1   | 21313138                                                                                                                                                                           | N-Term(iTRAQ4plex), K16(iTRAQ4plex)                                  | 2054.09726 |     |     |      | 2.84  | Expt1 |
| GTTASQMAQALALDK                      | 1   | 6678097;255759941                                                                                                                                                                  | N-Term(iTRAQ4plex), M7(Oxidation), K15(iTRAQ4plex)                   | 1809.96988 |     |     |      | 2.84  | Expt1 |
| VFNYNTLR                             | 1   | 29789080                                                                                                                                                                           | N-Term(iTRAQ4plex)                                                   | 1299.68450 |     |     |      | 2.84  | Expt1 |
| GDLLFLTNR                            | 1   | 9910550                                                                                                                                                                            | N-Term(iTRAQ4plex)                                                   | 1192.68193 |     |     |      | 2.84  | Expt1 |
| VEGGTPLFTLR                          | 1   | 21313536                                                                                                                                                                           | N-Term(iTRAQ4plex)                                                   | 1333.75762 |     |     |      | 2.84  | Expt1 |
| VSWQEPQCDR                           | 1   | 110735428;110735426                                                                                                                                                                | N-Term(iTRAQ4plex), C8(Methylthio)                                   | 1437.63640 |     |     |      | 2.84  | Expt1 |
| ELIPAEELR                            | 1   | 256000745;256418964;254675117;254675195;254675201;254675251;254675253;254675259;254675119;254675244;254675265;254675115                                                            | N-Term(iTRAQ4plex)                                                   | 1284.72710 |     |     |      | 2.83  | Expt1 |
| EVSFWAELR                            | 1   | 117553604                                                                                                                                                                          | N-Term(iTRAQ4plex)                                                   | 1280.68096 |     |     |      | 2.83  | Expt1 |
| AQEFLQHRILNK                         | 1   | 188528622                                                                                                                                                                          | N-Term(iTRAQ4plex), Q6(Deamidated), N11(Deamidated), K12(iTRAQ4plex) | 1786.98491 |     |     |      | 2.83  | Expt1 |
| ETLTPAELR                            | 1   | 254587904                                                                                                                                                                          | N-Term(iTRAQ4plex)                                                   | 1173.66057 |     |     |      | 2.83  | Expt1 |
| TNEGVIEFR                            | 1   | 224967104                                                                                                                                                                          | N-Term(iTRAQ4plex)                                                   | 1208.64336 |     |     |      | 2.83  | Expt1 |
| QGTVLQEAQDTMQGTGR                    | 1   | 113865981                                                                                                                                                                          | N-Term(iTRAQ4plex)                                                   | 2034.99724 |     |     |      | 2.83  | Expt1 |
| VEIATLTR                             | 1   | 6755196                                                                                                                                                                            | N-Term(iTRAQ4plex)                                                   | 1046.63384 |     |     |      | 2.83  | Expt1 |
| ILLNACCPGWVR                         | 1   | 82975294;113680352;51830180                                                                                                                                                        | N-Term(iTRAQ4plex), C6(Methylthio), C7(Methylthio)                   | 1580.77031 |     |     |      | 2.82  | Expt1 |
| NILGGTVFR                            | 1   | 225579033;162417975                                                                                                                                                                | N-Term(iTRAQ4plex)                                                   | 1120.66191 |     |     |      | 2.82  | Expt1 |
| VAIYSPDGVR                           | 1   | 168823441                                                                                                                                                                          | N-Term(iTRAQ4plex)                                                   | 1220.67632 |     |     |      | 2.82  | Expt1 |
| GGGLGLGSLVSGSFGSAGSSQGGMSFGSGGSGSSVK | 67  | 20911031                                                                                                                                                                           | N-Term(iTRAQ4plex), K40(iTRAQ4plex)                                  | 3580.72158 | 199 | 146 |      | 11.90 | Expt2 |
| AIGGLSSGGLSSSTIK                     | 52  | 54607171;113195684                                                                                                                                                                 | N-Term(iTRAQ4plex), K18(iTRAQ4plex)                                  | 1867.03972 | 190 | 160 |      | 7.36  | Expt2 |
| GGGLGLGSLVSGSFGSAGSSQGGMSFGSGGSGSSVK | 37  | 20911031                                                                                                                                                                           | N-Term(iTRAQ4plex), M27(Oxidation), K40(iTRAQ4plex)                  | 3596.70986 | 186 | 124 |      | 10.09 | Expt2 |
| SELEAIASPPAETHVTFVDFDAFOR            | 204 | 111074529                                                                                                                                                                          | N-Term(iTRAQ4plex)                                                   | 3050.48673 | 178 | 89  |      | 8.71  | Expt2 |
| VLLFSDGNSQGATAEAIEK                  | 171 | 6753484                                                                                                                                                                            | N-Term(iTRAQ4plex), K19(iTRAQ4plex)                                  | 2238.18291 | 172 | 165 | 1.02 | 8.23  | Expt2 |
| EVAFAFGSDLDAATQQLLSR                 | 8   | 6680748                                                                                                                                                                            | N-Term(iTRAQ4plex)                                                   | 2482.27805 | 166 | 127 |      | 8.72  | Expt2 |
| EIAEAYLGHVPTNAVITVPAYFNDSQR          | 44  | 124339829;124339826                                                                                                                                                                | N-Term(iTRAQ4plex)                                                   | 3119.60080 | 165 | 74  |      | 9.27  | Expt2 |
| WLTEENVEAWHTANAVFSPSR                | 25  | 148277039                                                                                                                                                                          | N-Term(iTRAQ4plex)                                                   | 2588.27304 | 165 | 76  |      | 8.08  | Expt2 |
| SSGSPYGGYGGSGGSGGYGSR                | 9   | 82801284;94371439;149252089;149257353;82918363;82918359;82954743;149266199;82954739;149266545;82956957;51769129;149266569;82957137;94400765;149268214;149268216;37674277;157277969 | N-Term(iTRAQ4plex)                                                   | 2054.89556 | 156 | 145 |      | 7.06  | Expt2 |
| ETDITDADQVIASFK                      | 48  | 11230802                                                                                                                                                                           | N-Term(iTRAQ4plex), K16(iTRAQ4plex)                                  | 2030.01726 | 155 | 106 | 1.61 | 6.50  | Expt2 |
| IITITGDDQIQNAQYLLONSVK               | 16  | 13384620                                                                                                                                                                           | N-Term(iTRAQ4plex), K23(iTRAQ4plex)                                  | 2877.59708 | 153 | 87  |      | 8.66  | Expt2 |
| GLGTDEDSILNLLTSR                     | 51  | 6753060                                                                                                                                                                            | N-Term(iTRAQ4plex)                                                   | 1847.98906 | 153 | 121 | 0.98 | 6.76  | Expt2 |
| YDGATIVPGDQADYQHFIQCCTDDVR           | 11  | 19482160                                                                                                                                                                           | N-Term(iTRAQ4plex), C22(Methylthio)                                  | 3202.43186 | 152 | 63  |      | 6.93  | Expt2 |
| AAVAASGLNLTVEGDGQFTLLAPTNEAFEK       | 62  | 6678321                                                                                                                                                                            | N-Term(iTRAQ4plex), K30(iTRAQ4plex)                                  | 3322.74314 | 152 | 144 |      | 9.65  | Expt2 |

|                                |     |                                                                                     |                                                                       |            |     |     |      |      |       |
|--------------------------------|-----|-------------------------------------------------------------------------------------|-----------------------------------------------------------------------|------------|-----|-----|------|------|-------|
| SSGPTSLFAVTVAPPGAR             | 42  | 160333923                                                                           | N-Term(iTRAQ4plex)                                                    | 1859.01750 | 150 | 124 | 0.99 | 6.60 | Expt2 |
| QAFDTVATGSLGQGLGAACGMAYTGK     | 200 | 6678359                                                                             | N-Term(iTRAQ4plex), C19(Methylthio), K26(iTRAQ4plex)                  | 2809.36283 | 149 | 148 | 1.19 | 9.43 | Expt2 |
| TAFDEAIAELDTLSEESYK            | 47  | 6756041                                                                             | N-Term(iTRAQ4plex), K19(iTRAQ4plex)                                   | 2420.19975 | 148 | 118 | 1.21 | 7.72 | Expt2 |
| NEEDATELVGLAQAVNAR             | 21  | 6678483                                                                             | N-Term(iTRAQ4plex)                                                    | 2044.04326 | 148 | 131 | 1.36 | 6.36 | Expt2 |
| LAPITSDPTAEAAVGAVEASF          | 79  | 31981562                                                                            | N-Term(iTRAQ4plex), K22(iTRAQ4plex)                                   | 2433.31601 | 147 | 122 | 1.09 | 7.82 | Expt2 |
| ISVFATYSSEGGEPVTDATTELSQDSK    | 17  | 111074529                                                                           | N-Term(iTRAQ4plex), K28(iTRAQ4plex)                                   | 3164.53855 | 147 | 119 |      | 8.42 | Expt2 |
| APDVDVSVAGPDAALK               | 13  | 61743961                                                                            | N-Term(iTRAQ4plex), K16(iTRAQ4plex)                                   | 1812.99614 | 146 | 120 |      | 5.55 | Expt2 |
| GADFLVTEVENGSLGSK              | 75  | 31981562                                                                            | N-Term(iTRAQ4plex), N11(Deamidated), K18(iTRAQ4plex)                  | 2069.06645 | 145 | 110 | 1.18 | 6.47 | Expt2 |
| VNPTVFFDITADDEPLGR             | 42  | 14925773:6679439                                                                    | N-Term(iTRAQ4plex)                                                    | 2150.09355 | 145 | 128 |      |      | Expt2 |
| QAYEIQDPEWDVHDDFYCPR           | 36  | 6680554                                                                             | N-Term(iTRAQ4plex), C19(Methylthio)                                   | 2831.18753 | 144 | 84  |      | 8.11 | Expt2 |
| SVPMSTVVFSPDGVATEK             | 154 | 6678359                                                                             | N-Term(iTRAQ4plex), K18(iTRAQ4plex)                                   | 2203.12041 | 144 | 111 | 1.11 | 6.36 | Expt2 |
| GLGTDEDSLIEIICSR               | 32  | 149260099:6996913                                                                   | N-Term(iTRAQ4plex), C14(Methylthio)                                   | 1910.93437 | 143 | 102 |      | 6.69 | Expt2 |
| ATDLLLDDSLVSLFGNR              | 34  | 6755114                                                                             | N-Term(iTRAQ4plex)                                                    | 1993.07536 | 143 | 122 | 1.60 | 6.41 | Expt2 |
| EGNPEDDITADQNAQAAALYK          | 24  | 110227377                                                                           | N-Term(iTRAQ4plex), K22(iTRAQ4plex)                                   | 2637.29106 | 143 | 118 | 1.03 | 8.70 | Expt2 |
| GVGIHSEGNETVEDIAR              | 43  | 21450277:30409956:21450321                                                          | N-Term(iTRAQ4plex)                                                    | 1974.02971 | 143 | 141 | 1.01 | 7.68 | Expt2 |
| EAQAGLAEAOEDLEAER              | 23  | 29336026                                                                            | N-Term(iTRAQ4plex)                                                    | 1973.95000 | 143 | 116 |      | 6.26 | Expt2 |
| SINPDEAVAYGAQAAILMGDK          | 24  | 124339838:124339829:124339826                                                       | N-Term(iTRAQ4plex), K23(iTRAQ4plex)                                   | 2592.36783 | 142 | 95  |      | 9.11 | Expt2 |
| IAIPGLAGAGNSVLLVSNLNP          | 16  | 116517303:116517301                                                                 | N-Term(iTRAQ4plex)                                                    | 2419.38993 | 142 | 94  |      | 7.66 | Expt2 |
| EVQGNESDLFMSYFPR               | 60  | 110227377                                                                           | N-Term(iTRAQ4plex)                                                    | 2062.97002 | 141 | 111 |      | 6.90 | Expt2 |
| EPVAETDIMATNGVYVINTVLQPPANRQER | 19  | 6678321                                                                             | N-Term(iTRAQ4plex), N12(Deamidated)                                   | 3638.86757 | 140 | 62  |      | 8.05 | Expt2 |
| LVQDVANNTNEEAGDGTITATVLR       | 9   | 149270048:183396771                                                                 | N-Term(iTRAQ4plex)                                                    | 2704.35752 | 139 | 131 |      | 8.06 | Expt2 |
| GPPGPMPPGLAGPPGESGR            | 55  | 34328108                                                                            | N-Term(iTRAQ4plex)                                                    | 1928.97295 | 138 | 136 |      | 6.38 | Expt2 |
| EISPDITLLDQNDISELR             | 148 | 20137008                                                                            | N-Term(iTRAQ4plex)                                                    | 2430.24907 | 138 | 112 | 1.12 | 7.63 | Expt2 |
| LYGPPSVFADFVVR                 | 33  | 161353502                                                                           | N-Term(iTRAQ4plex)                                                    | 1803.90764 | 138 | 99  |      | 5.32 | Expt2 |
| DPSALESQLODTEQLLEENR           | 30  | 114326446                                                                           | N-Term(iTRAQ4plex)                                                    | 2637.28580 | 137 | 114 | 1.22 | 7.28 | Expt2 |
| ENDDVVSEDLVQDDVDLYEAGELK       | 12  | 31981302:158966670                                                                  | N-Term(iTRAQ4plex), K25(iTRAQ4plex)                                   | 3138.52402 | 135 | 98  | 0.99 | 7.17 | Expt2 |
| QLDSGLLLVTPGLVINR              | 39  | 82880886:149261044:149270558:149270560:149274983:84662736                           | N-Term(iTRAQ4plex)                                                    | 1952.17217 | 135 | 108 | 1.10 | 6.20 | Expt2 |
| VLPMTGVEAGETACK                | 15  | 8393866                                                                             | N-Term(iTRAQ4plex), C15(Methylthio), K16(iTRAQ4plex)                  | 1953.97075 | 135 | 132 |      | 6.67 | Expt2 |
| LFIGLSFETTEESLR                | 42  | 149274531:32880197:109134362                                                        | N-Term(iTRAQ4plex)                                                    | 1943.02898 | 135 | 99  |      | 5.32 | Expt2 |
| TAFDDAIAELDTLNEYSYK            | 15  | 31543976                                                                            | N-Term(iTRAQ4plex), K19(iTRAQ4plex)                                   | 2419.17510 | 135 | 110 | 1.37 | 7.05 | Expt2 |
| SINPDEAVAYGAQAAILSGDK          | 13  | 31981690                                                                            | N-Term(iTRAQ4plex), K23(iTRAQ4plex)                                   | 2548.35210 | 135 | 137 |      | 9.61 | Expt2 |
| FVDGLMIHSGDPVYVYDVTAVR         | 15  | 6755372                                                                             | N-Term(iTRAQ4plex)                                                    | 2612.29575 | 134 | 65  |      | 6.58 | Expt2 |
| NGVGNSSGLGGSVNDVVFSSR          | 46  | 82950147:82950149:149264086                                                         | N-Term(iTRAQ4plex), N1(Deamidated)                                    | 2257.04717 | 134 | 162 | 0.99 | 8.16 | Expt2 |
| IYAMEISDNPGDHELGEPEFR          | 9   | 160707889                                                                           | N-Term(iTRAQ4plex)                                                    | 2563.19107 | 134 | 67  |      | 6.74 | Expt2 |
| SSLSDPLEESSPIAAIFDTEMLEK       | 5   | 82950147:82950149:149264086                                                         | N-Term(iTRAQ4plex), K25(iTRAQ4plex)                                   | 2967.49729 | 134 | 73  |      | 8.05 | Expt2 |
| QNVVPTVAVGDDVMDVLTK            | 162 | 22203747                                                                            | N-Term(iTRAQ4plex), K21(iTRAQ4plex)                                   | 2444.33036 | 134 | 105 |      | 6.82 | Expt2 |
| TAFDEAIAELDTLNEYSYK            | 18  | 149263879:6756039                                                                   | N-Term(iTRAQ4plex), K19(iTRAQ4plex)                                   | 2433.19853 | 134 | 111 |      | 7.92 | Expt2 |
| YTLPPGVDPITLVSSLSPEGLTVEAPLPK  | 14  | 158937312                                                                           | N-Term(iTRAQ4plex), K30(iTRAQ4plex)                                   | 3353.83957 | 134 | 70  |      | 7.67 | Expt2 |
| AVTOSAEITIPVTFEAR              | 112 | 158937312                                                                           | N-Term(iTRAQ4plex)                                                    | 1977.08061 | 134 | 109 |      | 6.75 | Expt2 |
| FITPESTVMLLEAQAATGGIDPHR       | 12  | 82950147:82950149:149264086                                                         | N-Term(iTRAQ4plex)                                                    | 2811.48305 | 133 | 81  |      | 9.60 | Expt2 |
| NMNCIEMGMNPLENSGFEPAGFDGLK     | 47  | 20137008                                                                            | N-Term(iTRAQ4plex), M2(Oxidation), C4(Methylthio), K26(iTRAQ4plex)    | 3091.38535 | 133 | 87  |      | 7.64 | Expt2 |
| DITDTSIGAYWTSAPGMVR            | 69  | 111074529                                                                           | N-Term(iTRAQ4plex)                                                    | 2185.07598 | 133 | 113 | 1.22 | 6.71 | Expt2 |
| QVYEEEYGNLEDDVVDGTSYYQR        | 15  | 6753060                                                                             | N-Term(iTRAQ4plex)                                                    | 3059.35929 | 133 | 115 |      | 8.34 | Expt2 |
| TITLEVEPSDTHENVK               | 111 | 9845265:149250554:82894992:149254469:149254584:94385661:149259811:149262307:6755919 | N-Term(iTRAQ4plex), K16(iTRAQ4plex)                                   | 2076.13335 | 133 | 111 | 0.99 | 6.19 | Expt2 |
| TEFLSFMNTELAFAFK               | 55  | 149263303:94404308:21886811                                                         | N-Term(iTRAQ4plex), K16(iTRAQ4plex)                                   | 2138.10967 | 132 | 92  | 1.00 | 6.84 | Expt2 |
| QAFDTVATGSLGQGLGAACGMAYTGK     | 51  | 6678359                                                                             | N-Term(iTRAQ4plex), C19(Methylthio), M21(Oxidation), K26(iTRAQ4plex)  | 2825.35361 | 131 | 121 |      | 8.06 | Expt2 |
| AIPDLTAPVAOVAASNLVR            | 7   | 31543942                                                                            | N-Term(iTRAQ4plex)                                                    | 2220.28928 | 131 | 85  | 1.22 | 7.57 | Expt2 |
| AAFDFAIAELDTLSEESYK            | 4   | 226874906                                                                           | N-Term(iTRAQ4plex), K19(iTRAQ4plex)                                   | 2376.17412 | 131 | 95  | 1.14 | 6.85 | Expt2 |
| GIVDOSQQAQYEAFEISK             | 56  | 149269348:6756041                                                                   | N-Term(iTRAQ4plex), K18(iTRAQ4plex)                                   | 2329.20005 | 131 | 83  |      | 7.64 | Expt2 |
| QLSFPLSSEPTOGSYK               | 52  | 148277039                                                                           | N-Term(iTRAQ4plex), K16(iTRAQ4plex)                                   | 2057.08476 | 130 | 116 |      | 5.95 | Expt2 |
| OYLVTYTPAAGGTQEVTVR            | 100 | 111074529                                                                           | N-Term(iTRAQ4plex)                                                    | 2327.21061 | 130 | 110 |      | 6.84 | Expt2 |
| NADMSEEMQONSVECATQALEK         | 12  | 82998589                                                                            | N-Term(iTRAQ4plex), Q10(Deamidated), C15(Methylthio), K22(iTRAQ4plex) | 2791.21927 | 130 | 105 |      | 8.57 | Expt2 |
| NADMSEEMQODSVECATQALEK         | 9   | 213688406                                                                           | N-Term(iTRAQ4plex), C15(Methylthio), K22(iTRAQ4plex)                  | 2791.21927 | 130 | 105 |      | 8.57 | Expt2 |

|                                    |     |                                                                                                                                                                                                                                                                                                                                                          |                                                                                                                        |            |     |     |      |       |       |
|------------------------------------|-----|----------------------------------------------------------------------------------------------------------------------------------------------------------------------------------------------------------------------------------------------------------------------------------------------------------------------------------------------------------|------------------------------------------------------------------------------------------------------------------------|------------|-----|-----|------|-------|-------|
| AEGSDVANAVLDGADCIMLSGETAK          | 20  | 31981562                                                                                                                                                                                                                                                                                                                                                 | N-Term(iTRAQ4plex), C16(Methylthio), K25(iTRAQ4plex)                                                                   | 2771.31670 | 129 | 138 | 1.22 | 9.83  | Expt2 |
| ITYOPSTGEGNEQITVGGRR               | 178 | 111074529                                                                                                                                                                                                                                                                                                                                                | N-Term(iTRAQ4plex), N11(Deamidated)                                                                                    | 2253.11260 | 129 | 130 | 1.63 | 6.98  | Expt2 |
| IAQLEEELEEEQNGTELINDR              | 20  | 114326446                                                                                                                                                                                                                                                                                                                                                | N-Term(iTRAQ4plex)                                                                                                     | 2616.28379 | 129 | 97  |      | 7.02  | Expt2 |
| NMNCIEMGNPLENSGFEPAGFDGLK          | 78  | 20137008                                                                                                                                                                                                                                                                                                                                                 | N-Term(iTRAQ4plex), C4(Methylthio), K26(iTRAQ4plex)                                                                    | 3075.39731 | 129 | 103 | 0.99 | 7.47  | Expt2 |
| FITPESTVMLEAOAATGGIIPHR            | 12  | 82950147:82950149:149264086                                                                                                                                                                                                                                                                                                                              | N-Term(iTRAQ4plex), M9(Oxidation)                                                                                      | 2827.47782 | 129 | 90  |      | 8.71  | Expt2 |
| GEPGPAGSVGPVGAVGPR                 | 216 | 111120329                                                                                                                                                                                                                                                                                                                                                | N-Term(iTRAQ4plex)                                                                                                     | 1704.91619 | 129 | 113 |      | 6.80  | Expt2 |
| EDMAALEKDYEEVGDASAEGDDEGEEY        | 6   | 6678469                                                                                                                                                                                                                                                                                                                                                  | N-Term(iTRAQ4plex), K8(iTRAQ4plex)                                                                                     | 3254.36350 | 128 | 72  |      | 6.78  | Expt2 |
| DLADELALVDVMEDEK                   | 43  | 6754524:257743039                                                                                                                                                                                                                                                                                                                                        | N-Term(iTRAQ4plex), K15(iTRAQ4plex)                                                                                    | 1964.01396 | 128 | 108 | 1.92 | 6.38  | Expt2 |
| TDLEMQIEQLNEELAYLK                 | 17  | 226823220                                                                                                                                                                                                                                                                                                                                                | N-Term(iTRAQ4plex), K18(iTRAQ4plex)                                                                                    | 2468.28750 | 127 | 73  | 0.99 | 6.72  | Expt2 |
| EESPLIQOQATVSDIPR                  | 31  | 46849812                                                                                                                                                                                                                                                                                                                                                 | N-Term(iTRAQ4plex)                                                                                                     | 2081.10185 | 127 | 117 | 1.05 | 5.76  | Expt2 |
| NLEWIAAGTWTSPALK                   | 63  | 22203747                                                                                                                                                                                                                                                                                                                                                 | N-Term(iTRAQ4plex), K16(iTRAQ4plex)                                                                                    | 2032.10845 | 126 | 107 | 1.20 | 6.13  | Expt2 |
| DASSYLMMEHVSALSDLSFGAPAAPOPSMSSEER | 12  | 7305121                                                                                                                                                                                                                                                                                                                                                  | N-Term(iTRAQ4plex)                                                                                                     | 3928.77756 | 126 | 73  | 1.10 | 7.33  | Expt2 |
| GPGLDLEAPTNLVISER                  | 108 | 111074529                                                                                                                                                                                                                                                                                                                                                | N-Term(iTRAQ4plex)                                                                                                     | 1811.96465 | 126 | 106 |      | 5.99  | Expt2 |
| DGFCQCGPCPDGYTNGITCSDVDECK         | 34  | 6755781                                                                                                                                                                                                                                                                                                                                                  | N-Term(iTRAQ4plex), C5(Methylthio), C8(Methylthio), N15(Deamidated), C19(Methylthio), C25(Methylthio), K26(iTRAQ4plex) | 3154.16013 | 126 | 83  |      | 8.05  | Expt2 |
| AVFVDLEPTVIDEVR                    | 98  | 6755901:34740335:51765047:8293056<br>0:6678469                                                                                                                                                                                                                                                                                                           | N-Term(iTRAQ4plex)                                                                                                     | 1846.01152 | 125 | 94  | 1.21 | 5.54  | Expt2 |
| DDLGGFTEETIK                       | 25  | 164565411                                                                                                                                                                                                                                                                                                                                                | N-Term(iTRAQ4plex), K13(iTRAQ4plex)                                                                                    | 1741.87187 | 125 | 110 |      | 5.78  | Expt2 |
| ILTVEDHYEGGIEAVSAVVGEVGVTVTR       | 191 | 6678359                                                                                                                                                                                                                                                                                                                                                  | N-Term(iTRAQ4plex)                                                                                                     | 3332.71396 | 125 | 83  | 1.13 | 8.08  | Expt2 |
| ASVTVLGDLGMSAMQNTODLLK             | 30  | 148277039                                                                                                                                                                                                                                                                                                                                                | N-Term(iTRAQ4plex), M14(Oxidation), K22(iTRAQ4plex)                                                                    | 2578.40549 | 125 | 113 |      | 8.14  | Expt2 |
| WGEGAEYVVESTGVFTTMEK               | 87  | 149248895:149249272:149251040:149<br>251044:149251140:149251223:149251<br>463:149251509:149251903:149251905:<br>149251911:149251964:149251966:149<br>257623:149258770:149258772:149258<br>934:149258938:149259154:149259607:<br>149260709:149263021:149265154:149<br>265502:149265922:149266427:149266<br>431:149268472:149268967:82996390:1<br>49273204 | N-Term(iTRAQ4plex), K21(iTRAQ4plex)                                                                                    | 2579.26810 | 125 | 113 | 0.99 | 7.28  | Expt2 |
| TPAILEASAGAIQNLCAGR                | 9   | 146219835:146219830:146219849:146<br>231979                                                                                                                                                                                                                                                                                                              | N-Term(iTRAQ4plex), C16(Methylthio)                                                                                    | 2046.06108 | 125 | 88  |      | 6.85  | Expt2 |
| GETGPAGPAGPIGPAGAR                 | 363 | 34328108                                                                                                                                                                                                                                                                                                                                                 | N-Term(iTRAQ4plex)                                                                                                     | 1676.88567 | 124 | 124 | 1.47 | 7.54  | Expt2 |
| ASVTVLGDLGMSAMQNTODLLK             | 46  | 148277039                                                                                                                                                                                                                                                                                                                                                | N-Term(iTRAQ4plex), K22(iTRAQ4plex)                                                                                    | 2562.40848 | 124 | 102 | 1.12 | 8.87  | Expt2 |
| VPAPTNLQFTEVPESFR                  | 57  | 111074529                                                                                                                                                                                                                                                                                                                                                | N-Term(iTRAQ4plex)                                                                                                     | 2177.13872 | 124 | 99  | 1.52 | 5.68  | Expt2 |
| CQDLNVQDLADTDAR                    | 57  | 124517663                                                                                                                                                                                                                                                                                                                                                | N-Term(iTRAQ4plex), C1(Methylthio)                                                                                     | 1953.87883 | 124 | 112 | 0.98 | 5.75  | Expt2 |
| LPEGQLPEAEIPAAQAAAAAGGLK           | 49  | 149263538:149263685                                                                                                                                                                                                                                                                                                                                      | N-Term(iTRAQ4plex), K25(iTRAQ4plex)                                                                                    | 2632.46189 | 124 | 103 |      | 7.91  | Expt2 |
| VITNOYNSPTGLYSSENISFNNAVESK        | 5   | 158635992                                                                                                                                                                                                                                                                                                                                                | N-Term(iTRAQ4plex), K28(iTRAQ4plex)                                                                                    | 3378.66831 | 124 | 85  |      | 6.63  | Expt2 |
| SINPDEAVAYGAOVAAILMGDK             | 24  | 124339838:124339829:124339826                                                                                                                                                                                                                                                                                                                            | N-Term(iTRAQ4plex), M20(Oxidation), K23(iTRAQ4plex)                                                                    | 2608.36118 | 123 | 94  |      | 9.79  | Expt2 |
| SSASPTGNVLLSPLSVATALSALSGLAEHR     | 13  | 117606335                                                                                                                                                                                                                                                                                                                                                | N-Term(iTRAQ4plex)                                                                                                     | 3050.66159 | 123 | 116 | 1.35 | 10.28 | Expt2 |
| GEVGPAGPAGFAGPAGAAGOPGAK           | 39  | 111120329                                                                                                                                                                                                                                                                                                                                                | N-Term(iTRAQ4plex), N9(Deamidated), K24(iTRAQ4plex)                                                                    | 2324.18291 | 123 | 116 | 1.45 | 8.22  | Expt2 |
| SYELPDQGVITIGNER                   | 243 | 6671509:6752954:6671507:157823889:<br>14192922:33563240:30425250                                                                                                                                                                                                                                                                                         | N-Term(iTRAQ4plex)                                                                                                     | 1934.99907 | 123 | 85  | 0.99 | 5.56  | Expt2 |
| IFVGLNPEATEEK                      | 18  | 146260280:6754222                                                                                                                                                                                                                                                                                                                                        | N-Term(iTRAQ4plex), K14(iTRAQ4plex)                                                                                    | 1791.97637 | 123 | 114 |      | 5.13  | Expt2 |
| AEDGSVIDYELIDQDAR                  | 94  | 149260099:6996913                                                                                                                                                                                                                                                                                                                                        | N-Term(iTRAQ4plex)                                                                                                     | 2052.98686 | 123 | 121 | 1.47 | 6.22  | Expt2 |
| YLYSGQTLDTLGGK                     | 58  | 6678321                                                                                                                                                                                                                                                                                                                                                  | N-Term(iTRAQ4plex), K14(iTRAQ4plex)                                                                                    | 1803.98015 | 123 | 112 | 0.98 | 5.78  | Expt2 |
| IEQQLNPETLLQWNPSTMANAK             | 20  | 6678103                                                                                                                                                                                                                                                                                                                                                  | N-Term(iTRAQ4plex), K23(iTRAQ4plex)                                                                                    | 2915.52079 | 123 | 72  |      | 8.52  | Expt2 |
| VVIDVDPVNIIEGPDAK                  | 67  | 61743961                                                                                                                                                                                                                                                                                                                                                 | N-Term(iTRAQ4plex), K16(iTRAQ4plex)                                                                                    | 1984.05010 | 123 | 111 | 1.16 | 5.92  | Expt2 |
| LIPDPYSVNIVALYSDGEGNPPSPQGR        | 15  | 111074529                                                                                                                                                                                                                                                                                                                                                | N-Term(iTRAQ4plex)                                                                                                     | 3090.55332 | 122 | 90  |      | 8.25  | Expt2 |
| LLPETPSDFAIWQITDR                  | 59  | 111074529                                                                                                                                                                                                                                                                                                                                                | N-Term(iTRAQ4plex)                                                                                                     | 2243.18625 | 122 | 89  |      | 6.58  | Expt2 |
| EGTOYDLSVTALYASGAGEALSGK           | 69  | 111074529                                                                                                                                                                                                                                                                                                                                                | N-Term(iTRAQ4plex), K24(iTRAQ4plex)                                                                                    | 2676.36235 | 122 | 134 |      | 7.48  | Expt2 |
| SIPTVNMENLNYLEVNELEK               | 143 | 160333372                                                                                                                                                                                                                                                                                                                                                | N-Term(iTRAQ4plex), K21(iTRAQ4plex)                                                                                    | 2798.43949 | 122 | 99  |      | 6.68  | Expt2 |
| ALINADELANDVAGAEALLDR              | 6   | 115496850                                                                                                                                                                                                                                                                                                                                                | N-Term(iTRAQ4plex)                                                                                                     | 2298.21054 | 122 | 106 |      | 8.20  | Expt2 |
| OTQFTFTYSNDOPGVLIQVVEGER           | 21  | 124339829:124339826:31981690                                                                                                                                                                                                                                                                                                                             | N-Term(iTRAQ4plex)                                                                                                     | 2918.43363 | 122 | 95  |      | 6.73  | Expt2 |
| GLTSSSEPTSMVEK                     | 16  | 111074529                                                                                                                                                                                                                                                                                                                                                | N-Term(iTRAQ4plex), K13(iTRAQ4plex)                                                                                    | 1653.86711 | 121 | 104 |      | 5.53  | Expt2 |
| GIGMNLNGPAGMGMEGIGFGINK            | 5   | 21313308:158186704                                                                                                                                                                                                                                                                                                                                       | N-Term(iTRAQ4plex), K23(iTRAQ4plex)                                                                                    | 2466.25870 | 121 | 66  |      | 8.33  | Expt2 |
| GGETVMVSAAGAAGVSGVVGQIAK           | 42  | 13385466                                                                                                                                                                                                                                                                                                                                                 | N-Term(iTRAQ4plex), K23(iTRAQ4plex)                                                                                    | 2347.29581 | 121 | 81  |      | 7.95  | Expt2 |
| AYEEDYGSTLEEDIQGDTSGYLER           | 23  | 149265291:22165408                                                                                                                                                                                                                                                                                                                                       | N-Term(iTRAQ4plex)                                                                                                     | 2884.27951 | 121 | 101 |      | 7.87  | Expt2 |
| GTPGESGAAGPSGPIGSR                 | 112 | 111120329                                                                                                                                                                                                                                                                                                                                                | N-Term(iTRAQ4plex)                                                                                                     | 1698.85259 | 121 | 117 |      | 6.35  | Expt2 |

|                                  |     |                                                                                                                |                                                                     |            |     |     |      |      |       |
|----------------------------------|-----|----------------------------------------------------------------------------------------------------------------|---------------------------------------------------------------------|------------|-----|-----|------|------|-------|
| LFIGGLSFETDESRL                  | 19  | 6754220:85060507                                                                                               | N-Term(iTRAQ4plex)                                                  | 1929.01372 | 121 | 101 |      | 5.53 | Expt2 |
| FLENQOEYVOAVK                    | 61  | 124517663                                                                                                      | N-Term(iTRAQ4plex), K14(iTRAQ4plex)                                 | 2013.05657 | 121 | 95  | 0.99 | 7.67 | Expt2 |
| NNLSFIETSAALDSTNVEEAFK           | 5   | 6679583                                                                                                        | N-Term(iTRAQ4plex), K21(iTRAQ4plex)                                 | 2617.32969 | 121 | 80  |      | 6.71 | Expt2 |
| VTLPVPGDYTAK                     | 57  | 148277039                                                                                                      | N-Term(iTRAQ4plex), K13(iTRAQ4plex)                                 | 1649.93559 | 120 | 90  |      | 4.60 | Expt2 |
| GVVPLAGTNGETTQGLDGLSER           | 48  | 6671539                                                                                                        | N-Term(iTRAQ4plex), N9(Deamidated)                                  | 2417.23606 | 120 | 116 | 1.24 | 7.58 | Expt2 |
| AMGIMNSFVNDIFER                  | 148 | 68131547:68226433:30061385:149264032:160420312:46049029:28316760:68226431:160420308:30089704:30061387-13386452 | N-Term(iTRAQ4plex), N6(Deamidated)                                  | 1888.90410 | 120 | 106 | 1.23 | 7.14 | Expt2 |
| DLYANTVLSGGTMYPGIADR             | 169 | 6671509:6752954                                                                                                | N-Term(iTRAQ4plex), N5(Deamidated), M14(Oxidation)                  | 2376.15964 | 120 | 111 | 1.25 | 8.79 | Expt2 |
| TPNVGGPGGQVQEWATAR               | 14  | 29336026                                                                                                       | N-Term(iTRAQ4plex)                                                  | 1866.96294 | 120 | 120 |      | 5.59 | Expt2 |
| VPDGLPSALEQLYLEHNNVYTPDSYFR      | 3   | 10946680                                                                                                       | N-Term(iTRAQ4plex)                                                  | 3380.69089 | 120 | 57  |      | 6.05 | Expt2 |
| CDACPVGFTGPMVOGVGINFAK           | 17  | 6755781                                                                                                        | N-Term(iTRAQ4plex), C1(Methylthio), C4(Methylthio), K22(iTRAQ4plex) | 2591.22489 | 119 | 107 |      | 7.40 | Expt2 |
| NPLSDPLYDCIFVEGAGLTK             | 9   | 6678329                                                                                                        | N-Term(iTRAQ4plex), C10(Methylthio), K21(iTRAQ4plex)                | 2587.30698 | 119 | 100 | 1.23 | 7.11 | Expt2 |
| IPPVNTLNENLYLOGNR                | 127 | 10946680                                                                                                       | N-Term(iTRAQ4plex)                                                  | 2099.13286 | 119 | 106 |      | 7.55 | Expt2 |
| ILATPQOEDAPSVDIANIR              | 333 | 6678359                                                                                                        | N-Term(iTRAQ4plex)                                                  | 2164.17314 | 119 | 107 |      | 7.13 | Expt2 |
| MGYTDISAVDPDEPIHPPFFQNLANTSPEVNR | 5   | 133778947                                                                                                      | N-Term(iTRAQ4plex)                                                  | 3772.79844 | 119 | 70  |      | 7.25 | Expt2 |
| MVONLEIELOSLAMK                  | 164 | 118130981                                                                                                      | N-Term(iTRAQ4plex), M1(Oxidation), K16(iTRAQ4plex)                  | 2179.17046 | 119 | 121 | 1.23 | 7.30 | Expt2 |
| GVDEATHIDILTK                    | 76  | 124517663                                                                                                      | N-Term(iTRAQ4plex), K13(iTRAQ4plex)                                 | 1675.97795 | 119 | 100 | 0.98 | 6.01 | Expt2 |
| EADIDGGQGVNVEEFVQMMTAK           | 38  | 6753244                                                                                                        | N-Term(iTRAQ4plex), K22(iTRAQ4plex)                                 | 2778.28569 | 119 | 130 | 0.98 | 8.53 | Expt2 |
| EANIDGGQGVNVEEFVQMMTAK           | 41  | 149255253:149255689                                                                                            | N-Term(iTRAQ4plex), N3(Deamidated), K22(iTRAQ4plex)                 | 2778.28569 | 119 | 130 | 0.98 | 8.53 | Expt2 |
| AVLVLEPGTMSVR                    | 49  | 31981939:22165384                                                                                              | N-Term(iTRAQ4plex)                                                  | 1745.92510 | 119 | 92  | 1.22 | 4.77 | Expt2 |
| EYVMGNVIGGEGGAPTR                | 7   | 21450129                                                                                                       | N-Term(iTRAQ4plex)                                                  | 2050.01592 | 119 | 104 |      | 5.76 | Expt2 |
| VCSPHISGLYQAGAPAGGFGAQAPPK       | 30  | 124339826                                                                                                      | N-Term(iTRAQ4plex), C2(Methylthio), K28(iTRAQ4plex)                 | 2905.49448 | 119 | 90  |      | 7.72 | Expt2 |
| EISSNEQLQSSK                     | 21  | 118130981                                                                                                      | N-Term(iTRAQ4plex), K13(iTRAQ4plex)                                 | 1738.90874 | 119 | 99  | 0.99 | 6.23 | Expt2 |
| DATNVGDEGGFAPNILENK              | 27  | 149253386                                                                                                      | N-Term(iTRAQ4plex), K19(iTRAQ4plex)                                 | 2249.13262 | 118 | 101 | 1.39 | 6.79 | Expt2 |
| DGDGSIITQELGTVMR                 | 29  | 13386230                                                                                                       | N-Term(iTRAQ4plex)                                                  | 1823.89250 | 118 | 117 |      | 5.74 | Expt2 |
| LAPDYDALDVANK                    | 14  | 149265809:149233872:149260643:94388464:94388502:149265307:149266479                                            | N-Term(iTRAQ4plex), K13(iTRAQ4plex)                                 | 1692.91191 | 118 | 105 | 0.99 | 4.91 | Expt2 |
| FYEGSELVADSGVTDITMTR             | 24  | 6755781                                                                                                        | N-Term(iTRAQ4plex), M19(Oxidation)                                  | 2351.12693 | 118 | 82  | 1.45 | 7.24 | Expt2 |
| TGPCPOGPAPEVVIYQQLR              | 41  | 13385466                                                                                                       | N-Term(iTRAQ4plex), C4(Methylthio)                                  | 2243.14287 | 118 | 92  |      | 6.86 | Expt2 |
| NPPDITQEEYGEFYK                  | 24  | 40556608                                                                                                       | N-Term(iTRAQ4plex), K15(iTRAQ4plex)                                 | 2136.00054 | 118 | 93  | 1.12 | 5.69 | Expt2 |
| AAFEWNEEGAGSSPGLQVPR             | 17  | 117606335                                                                                                      | N-Term(iTRAQ4plex)                                                  | 2430.18766 | 118 | 99  |      | 7.67 | Expt2 |
| ENAAVFQFEAAQSTEAYLK              | 5   | 82950147:82950149:149264086                                                                                    | N-Term(iTRAQ4plex), K20(iTRAQ4plex)                                 | 2674.29911 | 118 | 76  |      | 6.48 | Expt2 |
| MVONLEIELOSLAMK                  | 116 | 118130981                                                                                                      | N-Term(iTRAQ4plex), K16(iTRAQ4plex)                                 | 2163.18047 | 118 | 132 | 1.65 | 7.32 | Expt2 |
| DLYANTVLSGGTMYPGIADR             | 142 | 6671509:6752954                                                                                                | N-Term(iTRAQ4plex)                                                  | 2359.16997 | 117 | 121 | 1.40 | 8.18 | Expt2 |
| SFSAASAITPSVSR                   | 334 | 20911031                                                                                                       | N-Term(iTRAQ4plex)                                                  | 1524.81584 | 117 | 109 | 0.99 | 5.93 | Expt2 |
| AMLSGPGQFAENETNEVNFNR            | 8   | 149249090:82923135                                                                                             | N-Term(iTRAQ4plex)                                                  | 2355.11734 | 117 | 93  |      | 6.73 | Expt2 |
| DOMOQOLSDEYQLLDVK                | 24  | 188219989                                                                                                      | N-Term(iTRAQ4plex), K17(iTRAQ4plex)                                 | 2369.19577 | 117 | 79  | 1.21 | 7.22 | Expt2 |
| LLDFGSLSNLQVTPQTVGMNFK           | 6   | 149261626:149261791:6677801                                                                                    | N-Term(iTRAQ4plex), K22(iTRAQ4plex)                                 | 2697.46085 | 117 | 77  |      | 8.75 | Expt2 |
| GEVQTVTFDTDEVK                   | 19  | 111074529                                                                                                      | N-Term(iTRAQ4plex), K14(iTRAQ4plex)                                 | 1855.95378 | 117 | 44  |      | 5.32 | Expt2 |
| GIGTNEQAIHDVTK                   | 52  | 149265291:22165408                                                                                             | N-Term(iTRAQ4plex), K15(iTRAQ4plex)                                 | 1860.07413 | 117 | 110 |      | 6.57 | Expt2 |
| VDATEESDLAQOYVGR                 | 32  | 42415475                                                                                                       | N-Term(iTRAQ4plex)                                                  | 1924.93596 | 116 | 102 |      | 6.33 | Expt2 |
| INPDGQSQVVEVPYAR                 | 9   | 9903607                                                                                                        | N-Term(iTRAQ4plex)                                                  | 1874.97222 | 116 | 101 |      | 5.54 | Expt2 |
| ISIGGSSCGIGGGYGSR                | 72  | 54607171:113195684                                                                                             | N-Term(iTRAQ4plex), C8(Methylthio)                                  | 1687.80205 | 116 | 116 |      | 6.04 | Expt2 |
| EILVGDVGQTVDDPYTTFVK             | 17  | 149255823:6680924                                                                                              | N-Term(iTRAQ4plex), K20(iTRAQ4plex)                                 | 2484.31144 | 116 | 84  |      | 6.88 | Expt2 |
| EVDYLETONPALPCVELDEK             | 11  | 86439989                                                                                                       | N-Term(iTRAQ4plex), C14(Methylthio), K20(iTRAQ4plex)                | 2639.28659 | 116 | 103 |      | 6.57 | Expt2 |
| SAATSGAGSTTSGVVSGLGSR            | 3   | 146231996                                                                                                      | N-Term(iTRAQ4plex)                                                  | 2041.02776 | 116 | 147 |      | 6.95 | Expt2 |
| AFLADPSFAFAAAAPAAATTAAPAAAAAPAK  | 8   | 94383772:6671569                                                                                               | N-Term(iTRAQ4plex), K31(iTRAQ4plex)                                 | 2984.61582 | 115 | 81  |      | 7.38 | Expt2 |
| VWTSQGVVEYDLADDINSR              | 59  | 6680710                                                                                                        | N-Term(iTRAQ4plex)                                                  | 2456.13883 | 115 | 107 | 1.35 | 7.60 | Expt2 |
| AVLDVAETGTEAAATGVIGGIR           | 65  | 148747546                                                                                                      | N-Term(iTRAQ4plex)                                                  | 2286.24687 | 115 | 123 |      | 8.45 | Expt2 |
| EVFTEQADLSGITEAK                 | 35  | 148747546                                                                                                      | N-Term(iTRAQ4plex), K16(iTRAQ4plex)                                 | 2026.06145 | 115 | 125 | 1.64 | 6.51 | Expt2 |
| LDIETSQVSLGPEGK                  | 14  | 61743961                                                                                                       | N-Term(iTRAQ4plex), K16(iTRAQ4plex)                                 | 1977.02434 | 115 | 124 | 1.20 | 6.52 | Expt2 |
| DQLQTFSEHPVLLTEAPLNPR            | 5   | 8392847                                                                                                        | N-Term(iTRAQ4plex)                                                  | 2678.39664 | 115 | 42  |      | 6.17 | Expt2 |
| AGGGSFGGSLYGGGSR                 | 25  | 226823220                                                                                                      | N-Term(iTRAQ4plex)                                                  | 1644.78484 | 114 | 117 |      | 6.55 | Expt2 |
| GLSDWAEDEPVAK                    | 124 | 163310769                                                                                                      | N-Term(iTRAQ4plex), K13(iTRAQ4plex)                                 | 1704.87163 | 114 | 104 |      | 6.09 | Expt2 |

|                         |     |                                                                                                                                                                                                                                                                                                                                                             |                                                                     |            |     |     |      |      |       |
|-------------------------|-----|-------------------------------------------------------------------------------------------------------------------------------------------------------------------------------------------------------------------------------------------------------------------------------------------------------------------------------------------------------------|---------------------------------------------------------------------|------------|-----|-----|------|------|-------|
| LEQQVFNQVFGODEMIDVIGVTK | 9   | 149252852;149255712;149255716;94404874;149270989;149270993;149271090;149271094                                                                                                                                                                                                                                                                              | N-Term(iTRAQ4plex), K24(iTRAQ4plex)                                 | 2974.58329 | 114 | 78  |      | 6.54 | Expt2 |
| ALLAYAFALAGNODTK        | 58  | 148277039                                                                                                                                                                                                                                                                                                                                                   | N-Term(iTRAQ4plex), K16(iTRAQ4plex)                                 | 1955.08940 | 114 | 112 | 1.72 | 6.76 | Expt2 |
| ELDALDANDELTPGLR        | 18  | 150456419                                                                                                                                                                                                                                                                                                                                                   | N-Term(iTRAQ4plex)                                                  | 1885.96294 | 113 | 88  | 1.23 | 5.56 | Expt2 |
| MVONLEIELOSLAMK         | 89  | 118130981                                                                                                                                                                                                                                                                                                                                                   | N-Term(iTRAQ4plex), M1(Oxidation), M15(Oxidation), K16(iTRAQ4plex)  | 2195.17160 | 113 | 74  |      | 7.20 | Expt2 |
| GPMVSAQESQAAILQOAR      | 52  | 164565411                                                                                                                                                                                                                                                                                                                                                   | N-Term(iTRAQ4plex)                                                  | 2157.11846 | 113 | 120 |      | 7.97 | Expt2 |
| SLDLDLSIAEVK            | 314 | 29789317;20911031;54607171;113195684                                                                                                                                                                                                                                                                                                                        | N-Term(iTRAQ4plex), K12(iTRAQ4plex)                                 | 1590.92668 | 113 | 86  | 1.18 | 5.74 | Expt2 |
| NFASVQGVSLGESGSPSAYSAR  | 117 | 111074529                                                                                                                                                                                                                                                                                                                                                   | N-Term(iTRAQ4plex)                                                  | 2497.21196 | 113 | 120 | 1.31 | 8.03 | Expt2 |
| TPDLSVOLPSADLELK        | 29  | 149263538;149263685                                                                                                                                                                                                                                                                                                                                         | N-Term(iTRAQ4plex), K16(iTRAQ4plex)                                 | 2014.13103 | 113 | 105 |      | 5.28 | Expt2 |
| SVPMSTVFYPSDGVATEK      | 96  | 6678359                                                                                                                                                                                                                                                                                                                                                     | N-Term(iTRAQ4plex), M4(Oxidation), K18(iTRAQ4plex)                  | 2219.11186 | 113 | 99  |      | 6.47 | Expt2 |
| FCGFQVLEPQLVYSIGHTPPDAR | 3   | 94400773                                                                                                                                                                                                                                                                                                                                                    | N-Term(iTRAQ4plex), C2(Methylthio)                                  | 2764.37857 | 113 | 72  |      | 6.47 | Expt2 |
| LSLLELTLAENOLLR         | 18  | 6679166                                                                                                                                                                                                                                                                                                                                                     | N-Term(iTRAQ4plex)                                                  | 1999.15886 | 113 | 86  |      | 5.73 | Expt2 |
| GGGGGGGGGGPGGFQAPAPR    | 3   | 6755252                                                                                                                                                                                                                                                                                                                                                     | N-Term(iTRAQ4plex)                                                  | 1583.78484 | 113 | 129 |      | 6.39 | Expt2 |
| TLTLVDITGIMTK           | 68  | 40556608;6754254                                                                                                                                                                                                                                                                                                                                            | N-Term(iTRAQ4plex), K13(iTRAQ4plex)                                 | 1637.94231 | 113 | 110 | 1.23 | 5.37 | Expt2 |
| LSWDPSPSAVTGYK          | 39  | 111074529                                                                                                                                                                                                                                                                                                                                                   | N-Term(iTRAQ4plex), K14(iTRAQ4plex)                                 | 1795.94890 | 112 | 103 |      | 5.91 | Expt2 |
| TDYNASVSPVDSGSPER       | 20  | 13384620                                                                                                                                                                                                                                                                                                                                                    | N-Term(iTRAQ4plex)                                                  | 1924.90032 | 112 | 100 | 1.65 | 5.56 | Expt2 |
| FAIQDISVETSAAK          | 14  | 61097906;11230802;7304855;157951643                                                                                                                                                                                                                                                                                                                         | N-Term(iTRAQ4plex), K14(iTRAQ4plex)                                 | 1825.98760 | 112 | 116 |      | 5.50 | Expt2 |
| GLGTDEDTLIEILTR         | 30  | 124517663                                                                                                                                                                                                                                                                                                                                                   | N-Term(iTRAQ4plex)                                                  | 1891.01604 | 112 | 109 |      | 6.81 | Expt2 |
| AIVAIENPADVSVISSR       | 59  | 149251929;63514363;51766344;149264394;51770420;82994829;149270876                                                                                                                                                                                                                                                                                           | N-Term(iTRAQ4plex)                                                  | 1885.05412 | 112 | 109 |      | 5.97 | Expt2 |
| SLLVIPNTLAVNAQDSTDLVAK  | 9   | 110625624                                                                                                                                                                                                                                                                                                                                                   | N-Term(iTRAQ4plex), K23(iTRAQ4plex)                                 | 2641.50565 | 111 | 86  |      | 5.00 | Expt2 |
| LYIGLAGLATDVQTVQAR      | 15  | 6755202                                                                                                                                                                                                                                                                                                                                                     | N-Term(iTRAQ4plex)                                                  | 2033.15842 | 111 | 106 |      | 6.68 | Expt2 |
| IQGGSVVEMQGDDEMTR       | 3   | 162417975                                                                                                                                                                                                                                                                                                                                                   | N-Term(iTRAQ4plex)                                                  | 1880.89507 | 111 | 94  |      | 6.05 | Expt2 |
| MAPYQGPDAAPGALDYK       | 27  | 11230802                                                                                                                                                                                                                                                                                                                                                    | N-Term(iTRAQ4plex), K17(iTRAQ4plex)                                 | 2053.03032 | 111 | 112 |      | 6.25 | Expt2 |
| VTIAQGGVLPNIOAVLLPK     | 271 | 30061399;94394730;30089710;30061353;28316756;29244126;30061327;30061379;30061371                                                                                                                                                                                                                                                                            | N-Term(iTRAQ4plex), O13(Deamidated), K19(iTRAQ4plex)                | 2220.36454 | 111 | 84  |      | 7.47 | Expt2 |
| VSALDLAVLDQVEAR         | 17  | 28076935                                                                                                                                                                                                                                                                                                                                                    | N-Term(iTRAQ4plex)                                                  | 1742.98223 | 111 | 88  | 1.10 | 5.09 | Expt2 |
| SVEEVASEIQPFLR          | 58  | 82950147;82950149;149264086                                                                                                                                                                                                                                                                                                                                 | N-Term(iTRAQ4plex)                                                  | 1747.93791 | 111 | 83  | 1.88 | 6.09 | Expt2 |
| SLFNSTSDFSGMSSETK       | 14  | 6678103                                                                                                                                                                                                                                                                                                                                                     | N-Term(iTRAQ4plex), K17(iTRAQ4plex)                                 | 2155.01372 | 111 | 91  |      | 5.74 | Expt2 |
| GPPGPMGPPGLAGPPGESGR    | 273 | 34328108                                                                                                                                                                                                                                                                                                                                                    | N-Term(iTRAQ4plex), M6(Oxidation)                                   | 1944.97234 | 111 | 131 | 1.22 | 8.09 | Expt2 |
| ATENDIYNFFSPLNPVR       | 67  | 19527048;10946928                                                                                                                                                                                                                                                                                                                                           | N-Term(iTRAQ4plex)                                                  | 2141.07988 | 111 | 88  | 1.16 | 6.91 | Expt2 |
| GLLIEPAANSYLLAER        | 53  | 6678329                                                                                                                                                                                                                                                                                                                                                     | N-Term(iTRAQ4plex)                                                  | 1874.05425 | 111 | 103 | 1.05 | 5.95 | Expt2 |
| IVLESLODQAOESTVGGGVNR   | 26  | 226423922                                                                                                                                                                                                                                                                                                                                                   | N-Term(iTRAQ4plex)                                                  | 2445.27628 | 111 | 103 |      | 7.57 | Expt2 |
| QNVVPTVVAVGGVDMDVLTk    | 34  | 22203747                                                                                                                                                                                                                                                                                                                                                    | N-Term(iTRAQ4plex), M16(Oxidation), K21(iTRAQ4plex)                 | 2460.33323 | 111 | 101 |      | 6.65 | Expt2 |
| VDALMDEINFMK            | 177 | 20911031                                                                                                                                                                                                                                                                                                                                                    | N-Term(iTRAQ4plex), K12(iTRAQ4plex)                                 | 1713.88750 | 111 | 100 | 1.47 | 5.79 | Expt2 |
| GAQNIIPASTGAAK          | 23  | 149248895;149249564;149249566;149251040;149251044;149251140;149251463;149251509;149251903;149251905;149251911;149251964;149251966;149252413;149253819;149253823;149257623;149258744;149258770;149258772;149258934;149258938;149259607;149260709;149260711;94387946;149265154;149265922;149266302;149266427;149266431;149268472;82996390;149273204;149275059 | N-Term(iTRAQ4plex), K15(iTRAQ4plex)                                 | 1657.94695 | 111 | 91  |      | 5.20 | Expt2 |
| ALYQTEAFTADFOQTEAK      | 28  | 148747546                                                                                                                                                                                                                                                                                                                                                   | N-Term(iTRAQ4plex), K19(iTRAQ4plex)                                 | 2447.23807 | 111 | 102 | 0.99 | 7.62 | Expt2 |
| SVEVSDPVPAGDLVK         | 32  | 6678329                                                                                                                                                                                                                                                                                                                                                     | N-Term(iTRAQ4plex), K15(iTRAQ4plex)                                 | 1800.00334 | 111 | 100 |      | 5.17 | Expt2 |
| GGETVMVSAAGAVGSVVGQIAK  | 11  | 13385466                                                                                                                                                                                                                                                                                                                                                    | N-Term(iTRAQ4plex), M6(Oxidation), K23(iTRAQ4plex)                  | 2363.29502 | 111 | 84  |      | 6.48 | Expt2 |
| LSQTFPNADFAEITK         | 82  | 163310765                                                                                                                                                                                                                                                                                                                                                   | N-Term(iTRAQ4plex), N7(Deamidated), K15(iTRAQ4plex)                 | 1971.03330 | 111 | 100 |      | 5.65 | Expt2 |
| IPSAVGYOPLATDMGTMQER    | 28  | 31980648                                                                                                                                                                                                                                                                                                                                                    | N-Term(iTRAQ4plex)                                                  | 2410.18741 | 110 | 90  |      | 6.58 | Expt2 |
| EAAQMDMVDNGVEDLR        | 31  | 10092608                                                                                                                                                                                                                                                                                                                                                    | N-Term(iTRAQ4plex)                                                  | 1936.88616 | 110 | 93  | 1.61 | 6.31 | Expt2 |
| FSINTDDIMGSLTVR         | 146 | 148277039                                                                                                                                                                                                                                                                                                                                                   | N-Term(iTRAQ4plex)                                                  | 1913.97966 | 110 | 104 |      | 5.90 | Expt2 |
| GOVPCVTVTASPLDDAVLSELK  | 7   | 51766932                                                                                                                                                                                                                                                                                                                                                    | N-Term(iTRAQ4plex), Q2(Deamidated), C5(Methylthio), K22(iTRAQ4plex) | 2579.32248 | 110 | 83  |      | 7.11 | Expt2 |
| GEVPCVTVTASPLDDAVLSELK  | 5   | 149251053                                                                                                                                                                                                                                                                                                                                                   | N-Term(iTRAQ4plex), C5(Methylthio), K22(iTRAQ4plex)                 | 2579.32248 | 110 | 66  |      | 7.11 | Expt2 |
| ELQSTQAQLSEWR           | 14  | 29336026                                                                                                                                                                                                                                                                                                                                                    | N-Term(iTRAQ4plex)                                                  | 1719.87920 | 110 | 84  |      | 5.45 | Expt2 |

|                                 |     |                                                                             |                                                                     |            |     |     |      |      |       |
|---------------------------------|-----|-----------------------------------------------------------------------------|---------------------------------------------------------------------|------------|-----|-----|------|------|-------|
| VGVLQLEASPDFLATPEEK             | 99  | 148277039                                                                   | N-Term(iTRAQ4plex), K18(iTRAQ4plex)                                 | 2218.18706 | 110 | 103 | 1.96 | 6.72 | Expt2 |
| OFLGOMTLQNLLGEVK                | 16  | 6755781                                                                     | N-Term(iTRAQ4plex), M6(Oxidation), K17(iTRAQ4plex)                  | 2251.24015 | 110 | 68  |      | 6.42 | Expt2 |
| YITPDQLADLYK                    | 32  | 149253386                                                                   | N-Term(iTRAQ4plex), K12(iTRAQ4plex)                                 | 1727.94988 | 110 | 108 |      | 5.12 | Expt2 |
| SLEYLDLFSNOMSK                  | 145 | 160333372                                                                   | N-Term(iTRAQ4plex), K14(iTRAQ4plex)                                 | 1963.01433 | 109 | 110 | 1.92 | 5.58 | Expt2 |
| NMGGPYGGNGYGGGGSGGSGYGGGR       | 3   | 149274531;32880197;109134362                                                | N-Term(iTRAQ4plex)                                                  | 2334.00347 | 109 | 172 |      | 7.25 | Expt2 |
| SVGGSGGSGFDNLVTR                | 7   | 162287370                                                                   | N-Term(iTRAQ4plex)                                                  | 1710.85552 | 109 | 132 |      | 5.86 | Expt2 |
| GVLFGVPGAFPGCSK                 | 36  | 6755114                                                                     | N-Term(iTRAQ4plex), C14(Methylthio), K16(iTRAQ4plex)                | 1870.98210 | 109 | 77  |      | 5.88 | Expt2 |
| TPVVEGLTEGEEELR                 | 22  | 31560247                                                                    | N-Term(iTRAQ4plex)                                                  | 1930.97771 | 109 | 92  |      | 5.27 | Expt2 |
| STVISYECCPGYEK                  | 55  | 6678321                                                                     | N-Term(iTRAQ4plex), C8(Methylthio), C9(Methylthio), K14(iTRAQ4plex) | 1958.85698 | 109 | 92  |      | 5.50 | Expt2 |
| WEQGQADYMGADSFNLIK              | 17  | 7305121                                                                     | N-Term(iTRAQ4plex), K18(iTRAQ4plex)                                 | 2363.08902 | 109 | 85  |      | 6.85 | Expt2 |
| GPMSAQAESQAQAILQQAR             | 39  | 164565411                                                                   | N-Term(iTRAQ4plex), M3(Oxidation)                                   | 2173.11601 | 109 | 112 |      | 8.32 | Expt2 |
| TSGPPVSELITK                    | 19  | 13430890                                                                    | N-Term(iTRAQ4plex), K12(iTRAQ4plex)                                 | 1516.88616 | 109 | 97  |      | 5.07 | Expt2 |
| ASGPPVSELITK                    | 10  | 9845257;254588110                                                           | N-Term(iTRAQ4plex), K12(iTRAQ4plex)                                 | 1486.87676 | 109 | 97  |      | 4.64 | Expt2 |
| TYQVGWDTFCVK                    | 27  | 111074529                                                                   | N-Term(iTRAQ4plex), C10(Methylthio), K12(iTRAQ4plex)                | 1780.86907 | 109 | 79  |      | 4.49 | Expt2 |
| AAVPSGASTGIYEALER               | 52  | 149249466;149253386;149259350;6679651;7305027                               | N-Term(iTRAQ4plex)                                                  | 1949.05058 | 109 | 116 |      | 6.44 | Expt2 |
| GSAPPGVPEGOIR                   | 85  | 6754090                                                                     | N-Term(iTRAQ4plex)                                                  | 1505.82329 | 109 | 75  |      | 4.41 | Expt2 |
| NMAEQIIEIYSQVQSK                | 65  | 6678359                                                                     | N-Term(iTRAQ4plex), M2(Oxidation), K17(iTRAQ4plex)                  | 2313.20464 | 109 | 101 | 1.11 | 7.41 | Expt2 |
| AAVENLPTFLVELSR                 | 19  | 88014720                                                                    | N-Term(iTRAQ4plex)                                                  | 1803.01885 | 108 | 93  |      | 5.44 | Expt2 |
| FTPGTFTNQIOAAFR                 | 43  | 149251929;149252092;149252176;82905443;51766344;51770420;82994829;149270876 | N-Term(iTRAQ4plex)                                                  | 1842.96770 | 108 | 119 |      | 6.21 | Expt2 |
| DLQALQDYEQLOADTYR               | 41  | 111185907                                                                   | N-Term(iTRAQ4plex)                                                  | 2215.06450 | 108 | 103 | 1.43 | 6.79 | Expt2 |
| TPSQEQLLAALAAAR                 | 65  | 160707889                                                                   | N-Term(iTRAQ4plex)                                                  | 1812.99895 | 108 | 106 | 1.17 | 7.06 | Expt2 |
| GEGPEVDVSLNADLDVSGPK            | 13  | 61743961                                                                    | N-Term(iTRAQ4plex), K21(iTRAQ4plex)                                 | 2383.22641 | 108 | 65  |      | 6.22 | Expt2 |
| VSWDPSPSVLGYK                   | 47  | 111074529                                                                   | N-Term(iTRAQ4plex), K14(iTRAQ4plex)                                 | 1819.98503 | 108 | 94  | 1.19 | 5.76 | Expt2 |
| OFLGOMTLQNLLGEVK                | 18  | 6755781                                                                     | N-Term(iTRAQ4plex), K17(iTRAQ4plex)                                 | 2235.24199 | 108 | 105 | 1.53 | 6.99 | Expt2 |
| EVQGNESDLFMSYFPR                | 31  | 110227377                                                                   | N-Term(iTRAQ4plex), M11(Oxidation)                                  | 2078.96440 | 108 | 92  |      | 5.35 | Expt2 |
| TOLEELDELOATEDAK                | 25  | 33598964;114326446;241982716;241982718                                      | N-Term(iTRAQ4plex), K17(iTRAQ4plex)                                 | 2250.12993 | 108 | 120 | 1.48 | 6.03 | Expt2 |
| LLEAOLASGGVDPVNSVFLPK           | 24  | 82950147;82950149;149264086                                                 | N-Term(iTRAQ4plex), K22(iTRAQ4plex)                                 | 2541.45682 | 108 | 77  |      | 6.67 | Expt2 |
| ALNAOQGDLENPLELR                | 16  | 169234958;32129201;32129205                                                 | N-Term(iTRAQ4plex)                                                  | 1925.02580 | 108 | 92  |      | 6.77 | Expt2 |
| NOVAMNPTNTVDFAK                 | 24  | 31981690                                                                    | N-Term(iTRAQ4plex), K15(iTRAQ4plex)                                 | 1937.99932 | 108 | 104 | 0.99 | 5.58 | Expt2 |
| VGIGAFPTQODNEIGELLOTR           | 3   | 31560737                                                                    | N-Term(iTRAQ4plex)                                                  | 2431.26725 | 108 | 85  |      | 6.88 | Expt2 |
| LHLANGGPGQLVOIMR                | 38  | 28395018                                                                    | N-Term(iTRAQ4plex), N6(Deamidated)                                  | 1938.13675 | 108 | 103 |      | 6.97 | Expt2 |
| GVSSGPGPMGLMGR                  | 56  | 111120329                                                                   | N-Term(iTRAQ4plex)                                                  | 1543.78459 | 107 | 106 |      | 5.84 | Expt2 |
| TFVSITPAEVGLVGK                 | 66  | 6755040                                                                     | N-Term(iTRAQ4plex), K16(iTRAQ4plex)                                 | 1905.13126 | 107 | 96  |      | 6.32 | Expt2 |
| FSNEEIAMATVTALR                 | 29  | 6671539                                                                     | N-Term(iTRAQ4plex)                                                  | 1796.93962 | 107 | 93  |      | 5.89 | Expt2 |
| ASYSAVSLYGNPVR                  | 125 | 6681143                                                                     | N-Term(iTRAQ4plex)                                                  | 1627.85710 | 107 | 92  |      | 5.99 | Expt2 |
| GVVDSEDIPLNSR                   | 144 | 40556608;6754254;13385998                                                   | N-Term(iTRAQ4plex)                                                  | 1657.88945 | 107 | 90  |      | 5.24 | Expt2 |
| LGYYDADGGDFDVFDDAK              | 23  | 125628659;125628654                                                         | N-Term(iTRAQ4plex), K18(iTRAQ4plex)                                 | 2175.00052 | 107 | 101 | 1.40 | 6.49 | Expt2 |
| VAEPEESEAEPEAAEGR               | 7   | 58037101                                                                    | N-Term(iTRAQ4plex)                                                  | 1943.89495 | 107 | 105 |      | 5.23 | Expt2 |
| FAPPQPAEPWFSVK                  | 33  | 117553604;247269929                                                         | N-Term(iTRAQ4plex), K14(iTRAQ4plex)                                 | 1889.02544 | 107 | 81  |      | 5.50 | Expt2 |
| YLILNATQAEK                     | 19  | 31543974                                                                    | N-Term(iTRAQ4plex), K12(iTRAQ4plex)                                 | 1638.93559 | 107 | 98  | 0.99 | 4.84 | Expt2 |
| DVDIDSYPDEELPCRSAR              | 87  | 6755781                                                                     | N-Term(iTRAQ4plex), C14(Methylthio)                                 | 2113.91997 | 107 | 108 | 1.43 | 5.34 | Expt2 |
| DVPFGFOTVTSVDNKK                | 27  | 6678103                                                                     | N-Term(iTRAQ4plex), K15(iTRAQ4plex)                                 | 1942.02287 | 107 | 105 |      | 5.85 | Expt2 |
| LAALNPESNTSGLDIFAK              | 16  | 15617203                                                                    | N-Term(iTRAQ4plex), K18(iTRAQ4plex)                                 | 2149.17881 | 107 | 106 | 1.23 | 6.54 | Expt2 |
| MQQVEASLOPETLR                  | 31  | 124517726;86476056;160333710;6680586;130503301;148747546;269973939          | N-Term(iTRAQ4plex)                                                  | 1773.92803 | 106 | 72  |      | 5.85 | Expt2 |
| GPAIGGALPGISIQGPEGNLQMPGK       | 12  | 61743961                                                                    | N-Term(iTRAQ4plex), K26(iTRAQ4plex)                                 | 2760.53611 | 106 | 75  |      | 8.07 | Expt2 |
| VCSPIISGLYQAGAPGAGGGAQAPK       | 11  | 124339829                                                                   | N-Term(iTRAQ4plex), C2(Methylthio), K27(iTRAQ4plex)                 | 2808.44155 | 106 | 58  |      | 6.36 | Expt2 |
| TVTAMDVYVYALK                   | 150 | 149263932;94378251                                                          | N-Term(iTRAQ4plex), K12(iTRAQ4plex)                                 | 1598.91228 | 106 | 96  | 1.23 | 5.89 | Expt2 |
| TAQHVNNEHPOQETPAEAASSGATTGTVAAR | 6   | 164607147                                                                   | N-Term(iTRAQ4plex)                                                  | 3364.68198 | 106 | 83  |      | 7.12 | Expt2 |
| QNLDPLFEQYINLNR                 | 377 | 20911031                                                                    | N-Term(iTRAQ4plex), N12(Deamidated)                                 | 2022.04656 | 106 | 84  | 1.30 | 6.12 | Expt2 |
| LVLYTILPNEGVDVTK                | 181 | 148277039                                                                   | N-Term(iTRAQ4plex), K18(iTRAQ4plex)                                 | 2218.29595 | 106 | 115 | 1.27 | 5.87 | Expt2 |
| SSLQTMESDVYTEVR                 | 13  | 62526118                                                                    | N-Term(iTRAQ4plex)                                                  | 1888.90679 | 106 | 92  |      | 5.78 | Expt2 |
| SELEEDIHPEEDIISR                | 13  | 126518317                                                                   | N-Term(iTRAQ4plex)                                                  | 2031.02556 | 106 | 99  |      | 5.21 | Expt2 |

|                                   |     |                                                                     |                                                                     |            |     |     |      |      |       |
|-----------------------------------|-----|---------------------------------------------------------------------|---------------------------------------------------------------------|------------|-----|-----|------|------|-------|
| ECPGIEPVCVLDGWDATEK               | 11  | 6671688                                                             | N-Term(iTRAQ4plex), C2(Methylthio), C9(Methylthio), K20(iTRAQ4plex) | 2556.13750 | 106 | 82  |      | 5.58 | Expt2 |
| DGEAQAQAPGAPGAPAGER               | 102 | 34328108                                                            | N-Term(iTRAQ4plex)                                                  | 1808.86833 | 106 | 131 |      | 6.37 | Expt2 |
| LOWMAGGTFTGEALQYTR                | 80  | 6753484                                                             | N-Term(iTRAQ4plex)                                                  | 2174.08354 | 105 | 98  |      | 7.09 | Expt2 |
| GGNTMTGDAIDYLVK                   | 41  | 111074529                                                           | N-Term(iTRAQ4plex), K15(iTRAQ4plex)                                 | 1842.95513 | 105 | 98  | 0.98 | 5.83 | Expt2 |
| ILGADTSVDLEETGR                   | 46  | 6680748                                                             | N-Term(iTRAQ4plex)                                                  | 1719.89433 | 105 | 108 |      | 5.33 | Expt2 |
| ALODLENAASGDATVR                  | 3   | 34328077                                                            | N-Term(iTRAQ4plex)                                                  | 1774.90544 | 105 | 87  |      | 5.26 | Expt2 |
| CIDPISCEEPYLLIGENR                | 28  | 6753824                                                             | N-Term(iTRAQ4plex), C1(Methylthio), C7(Methylthio)                  | 2300.05864 | 105 | 106 |      | 6.02 | Expt2 |
| LLEAQAAATGIVDLSR                  | 22  | 111185907                                                           | N-Term(iTRAQ4plex)                                                  | 1871.07767 | 105 | 98  | 1.23 | 7.05 | Expt2 |
| DLPAAPAPGASAFAR                   | 13  | 13384778                                                            | N-Term(iTRAQ4plex)                                                  | 1626.87663 | 105 | 70  |      | 4.94 | Expt2 |
| ADDPSSYMEVQAANASGNWELVK           | 7   | 51491845                                                            | N-Term(iTRAQ4plex), K25(iTRAQ4plex)                                 | 2998.43406 | 105 | 72  |      | 7.51 | Expt2 |
| VAVVQYSGQQQQPGR                   | 169 | 6753484                                                             | N-Term(iTRAQ4plex)                                                  | 1845.96878 | 105 | 98  | 1.61 | 6.66 | Expt2 |
| VPWFDFPDTLLDLQNNK                 | 172 | 6681143                                                             | N-Term(iTRAQ4plex), K18(iTRAQ4plex)                                 | 2401.26641 | 104 | 73  |      | 7.61 | Expt2 |
| VENQENSVNLVIDDTLTK                | 9   | 157951604                                                           | N-Term(iTRAQ4plex), K18(iTRAQ4plex)                                 | 2347.22715 | 104 | 73  |      | 6.73 | Expt2 |
| HIYSPTVGDPIDEYTVVGR               | 99  | 111074529                                                           | N-Term(iTRAQ4plex)                                                  | 2337.21050 | 104 | 114 |      | 6.99 | Expt2 |
| DLLVTGAYEITDQSGGAGGLR             | 6   | 21312062                                                            | N-Term(iTRAQ4plex)                                                  | 2237.16227 | 104 | 100 |      | 5.18 | Expt2 |
| AIAELGIYPVAVDPLDTSR               | 52  | 31980648                                                            | N-Term(iTRAQ4plex)                                                  | 2132.14141 | 104 | 94  | 0.99 | 5.43 | Expt2 |
| PGGLLLGDEAPNFEANTTIGR             | 12  | 149241041;6671549                                                   | N-Term(iTRAQ4plex)                                                  | 2286.18877 | 104 | 109 |      |      | Expt2 |
| AVTGYNDPETHIISLFOAMNK             | 10  | 82950147;82950149;149264086                                         | N-Term(iTRAQ4plex), K22(iTRAQ4plex)                                 | 2671.37253 | 104 | 84  |      | 6.98 | Expt2 |
| LGELVGLPYDNTVLEELR                | 23  | 111074529                                                           | N-Term(iTRAQ4plex)                                                  | 2273.25528 | 104 | 97  | 1.18 | 7.81 | Expt2 |
| DQEGDVLFLIDNIFR                   | 12  | 31980648                                                            | N-Term(iTRAQ4plex)                                                  | 2066.06938 | 104 | 94  | 0.99 | 5.86 | Expt2 |
| GAAGALMYYDITR                     | 8   | 18390323                                                            | N-Term(iTRAQ4plex)                                                  | 1481.79265 | 104 | 66  |      | 4.98 | Expt2 |
| VFGETNLSVAWDHADGVPVQQYR           | 5   | 111074529                                                           | N-Term(iTRAQ4plex)                                                  | 2821.37088 | 104 | 79  |      | 7.99 | Expt2 |
| AFYNNVLGEYEEYITK                  | 21  | 8393866                                                             | N-Term(iTRAQ4plex), K16(iTRAQ4plex)                                 | 2241.14023 | 104 | 77  | 0.99 | 5.50 | Expt2 |
| WNTDNLGTETIVEDQLAR                | 4   | 6755963                                                             | N-Term(iTRAQ4plex)                                                  | 2320.16045 | 104 | 103 | 0.99 | 5.65 | Expt2 |
| GOVGGDVMNVEDAAPGVDLR              | 27  | 154090941;21489935                                                  | N-Term(iTRAQ4plex)                                                  | 2230.09355 | 104 | 96  | 1.60 | 6.47 | Expt2 |
| IFMNGADLSGITEENAPLK               | 31  | 6678085;6678083;76881807;6678079                                    | N-Term(iTRAQ4plex), K19(iTRAQ4plex)                                 | 2291.21537 | 104 | 78  | 0.99 | 6.96 | Expt2 |
| EMEENFAEAANYQDTIGR                | 16  | 31982755                                                            | N-Term(iTRAQ4plex), M2(Oxidation)                                   | 2361.08603 | 104 | 78  |      | 6.55 | Expt2 |
| YSPNTQVEILPQGR                    | 47  | 110227377                                                           | N-Term(iTRAQ4plex)                                                  | 1745.93572 | 103 | 100 |      | 5.67 | Expt2 |
| VVPVADIITPNQFEALLSGR              | 9   | 26006861                                                            | N-Term(iTRAQ4plex)                                                  | 2412.33268 | 103 | 78  |      | 6.44 | Expt2 |
| GPGLSGTQGTIALPAQLIEFR             | 14  | 149269973;149269975;149269977                                       | N-Term(iTRAQ4plex)                                                  | 2455.34928 | 103 | 86  |      | 7.05 | Expt2 |
| QPVTVELVDSGLRPPSTVNELESQISYDEVGER | 8   | 82950147;82950149;149264086                                         | N-Term(iTRAQ4plex)                                                  | 3961.02114 | 103 | 64  |      | 7.93 | Expt2 |
| YYADSOQQQAVK                      | 3   | 112421039                                                           | N-Term(iTRAQ4plex), K13(iTRAQ4plex)                                 | 1815.95476 | 103 | 106 |      | 5.82 | Expt2 |
| TTTTYQGVPNQGDLEYQMSSTAR           | 13  | 28395018                                                            | N-Term(iTRAQ4plex)                                                  | 2834.34061 | 103 | 85  |      | 5.58 | Expt2 |
| QCANLQNAIAEAQR                    | 170 | 20911031                                                            | N-Term(iTRAQ4plex), C2(Methylthio)                                  | 1848.88848 | 103 | 98  | 0.99 | 6.66 | Expt2 |
| LTPTYGDLNHLVSATMSGVTTCLR          | 3   | 33859488;31981939;7106439;2216538<br>4;21746161;149253488;149253527 | N-Term(iTRAQ4plex), C23(Methylthio)                                 | 2841.40628 | 103 | 47  |      | 6.50 | Expt2 |
| GLTVVQAFQELVEPK                   | 19  | 19882207                                                            | N-Term(iTRAQ4plex), K15(iTRAQ4plex)                                 | 1946.12126 | 103 | 92  | 1.71 | 6.53 | Expt2 |
| DLAILLGMLDPVEK                    | 41  | 6671549                                                             | N-Term(iTRAQ4plex), K14(iTRAQ4plex)                                 | 1815.05852 | 103 | 85  | 1.66 | 5.54 | Expt2 |
| MLLEYDSSYDEK                      | 3   | 6754084                                                             | N-Term(iTRAQ4plex), K13(iTRAQ4plex)                                 | 1881.90495 | 103 | 92  |      | 4.71 | Expt2 |
| TDLEMQIESLNEELAYLK                | 10  | 6754480                                                             | N-Term(iTRAQ4plex), K18(iTRAQ4plex)                                 | 2427.25566 | 103 | 87  |      | 5.29 | Expt2 |
| LAMQEFMLPVGASSFR                  | 13  | 149249466;149253386                                                 | N-Term(iTRAQ4plex)                                                  | 2041.07549 | 103 | 83  | 1.13 | 6.27 | Expt2 |
| SSEVVLSDGDEDYQR                   | 23  | 61743961                                                            | N-Term(iTRAQ4plex)                                                  | 1842.84697 | 103 | 107 | 1.21 | 5.21 | Expt2 |
| ENYAEILLDDGFLK                    | 45  | 6753484                                                             | N-Term(iTRAQ4plex), K13(iTRAQ4plex)                                 | 1814.94292 | 103 | 101 | 1.10 | 5.77 | Expt2 |
| GAEMETVIVPVDVMR                   | 15  | 55741460                                                            | N-Term(iTRAQ4plex)                                                  | 1819.91069 | 103 | 89  |      | 5.91 | Expt2 |
| LDPQLDTEQQWDTPCPR                 | 10  | 86439989                                                            | N-Term(iTRAQ4plex), C16(Methylthio)                                 | 2333.07291 | 103 | 79  | 1.11 | 6.71 | Expt2 |
| DOMQQQLSDYEQLLDVK                 | 10  | 188219589                                                           | N-Term(iTRAQ4plex), M3(Oxidation), K17(iTRAQ4plex)                  | 2385.18601 | 103 | 70  |      | 6.00 | Expt2 |
| CFSIDNPGYEVAVHPGGDTVAVGGTDGNVR    | 7   | 6755995                                                             | N-Term(iTRAQ4plex), C1(Methylthio)                                  | 3518.64109 | 103 | 45  |      | 6.21 | Expt2 |
| DVMICPDTSLLEDAK                   | 15  | 55741460                                                            | N-Term(iTRAQ4plex), C5(Methylthio), K14(iTRAQ4plex)                 | 1870.88591 | 103 | 94  |      | 5.17 | Expt2 |
| AAVLWGVNPFSEIEIEVAPPK             | 41  | 31560625                                                            | N-Term(iTRAQ4plex), K22(iTRAQ4plex)                                 | 2682.48337 | 103 | 74  | 0.97 | 6.62 | Expt2 |
| TTDGYVYGAIGDDR                    | 9   | 29293809                                                            | N-Term(iTRAQ4plex)                                                  | 1653.81890 | 103 | 93  |      | 5.17 | Expt2 |
| YFPTQALNFAFK                      | 43  | 63475897;82880803;22094075;148747<br>424;254692892                  | N-Term(iTRAQ4plex), K12(iTRAQ4plex)                                 | 1734.95012 | 103 | 107 |      | 5.55 | Expt2 |
| LGAPEEESAVVAGER                   | 5   | 38198665                                                            | N-Term(iTRAQ4plex)                                                  | 1792.88445 | 103 | 89  |      | 5.25 | Expt2 |
| APVPTGEVYFADSFDR                  | 23  | 6671664                                                             | N-Term(iTRAQ4plex)                                                  | 1914.93889 | 103 | 87  |      | 4.58 | Expt2 |
| VPPTVSTVLK                        | 39  | 111074529                                                           | N-Term(iTRAQ4plex), K11(iTRAQ4plex)                                 | 1429.89055 | 103 | 92  |      |      | Expt2 |



|                                  |     |                                                                                                                                                                                                                                                                                                                                                                                                                                             |                                                                     |            |     |     |      |      |       |
|----------------------------------|-----|---------------------------------------------------------------------------------------------------------------------------------------------------------------------------------------------------------------------------------------------------------------------------------------------------------------------------------------------------------------------------------------------------------------------------------------------|---------------------------------------------------------------------|------------|-----|-----|------|------|-------|
| EADIDGGQVNYEEFVQMMTAK            | 9   | 6753244                                                                                                                                                                                                                                                                                                                                                                                                                                     | N-Term(iTRAQ4plex), M18(Oxidation), K22(iTRAQ4plex)                 | 2794.28043 | 102 | 94  |      | 8.18 | Expt2 |
| EANIDGGQVNYEEFVQMMTAK            | 9   | 149255253;149255689                                                                                                                                                                                                                                                                                                                                                                                                                         | N-Term(iTRAQ4plex), N3(Deamidated), M18(Oxidation), K22(iTRAQ4plex) | 2794.28043 | 102 | 94  |      | 8.18 | Expt2 |
| AGLENSLAEVECR                    | 61  | 226823220                                                                                                                                                                                                                                                                                                                                                                                                                                   | N-Term(iTRAQ4plex), C12(Methylthio)                                 | 1580.75298 | 102 | 84  |      | 5.97 | Expt2 |
| VAEQTPLTALYVANLIK                | 20  | 6753036                                                                                                                                                                                                                                                                                                                                                                                                                                     | N-Term(iTRAQ4plex), K17(iTRAQ4plex)                                 | 2132.26023 | 102 | 81  |      | 5.82 | Expt2 |
| GAEAAVVTGPDGVPVVEGSR             | 8   | 20806532;47059495                                                                                                                                                                                                                                                                                                                                                                                                                           | N-Term(iTRAQ4plex)                                                  | 1926.96245 | 102 | 109 |      | 6.26 | Expt2 |
| DNLTWTSDMOGDGEQNK                | 14  | 226874906                                                                                                                                                                                                                                                                                                                                                                                                                                   | N-Term(iTRAQ4plex), K19(iTRAQ4plex)                                 | 2469.14774 | 102 | 107 |      | 6.17 | Expt2 |
| EYGFQFGEIEAIELPIDPK              | 17  | 146260280;6754222                                                                                                                                                                                                                                                                                                                                                                                                                           | N-Term(iTRAQ4plex), K19(iTRAQ4plex)                                 | 2483.30417 | 102 | 83  |      | 6.32 | Expt2 |
| NATNVEQSFMTMAAEIK                | 13  | 6679587                                                                                                                                                                                                                                                                                                                                                                                                                                     | N-Term(iTRAQ4plex), K17(iTRAQ4plex)                                 | 2173.09494 | 102 | 71  | 1.14 | 6.86 | Expt2 |
| GVVSDDLLPLNVS                    | 21  | 6755863                                                                                                                                                                                                                                                                                                                                                                                                                                     | N-Term(iTRAQ4plex)                                                  | 1629.85723 | 102 | 84  |      | 5.34 | Expt2 |
| LPAGLPTSLLLTYLDNNK               | 145 | 160333372                                                                                                                                                                                                                                                                                                                                                                                                                                   | N-Term(iTRAQ4plex), K18(iTRAQ4plex)                                 | 2231.29399 | 102 | 106 | 1.03 | 6.56 | Expt2 |
| LLNDEDPVVVTK                     | 12  | 28395018                                                                                                                                                                                                                                                                                                                                                                                                                                    | N-Term(iTRAQ4plex), K12(iTRAQ4plex)                                 | 1629.93401 | 102 | 78  |      | 5.58 | Expt2 |
| AMGIMNSFVNDIFER                  | 164 | 68131547;68226433;30061385;149264032;160420312;46049029;28316760;68226431;160420308;30089704;30061387;13386452                                                                                                                                                                                                                                                                                                                              | N-Term(iTRAQ4plex), M2(Oxidation), N10(Deamidated)                  | 1904.89665 | 102 | 99  | 1.23 | 6.70 | Expt2 |
| TVPFCSFAAFFTR                    | 66  | 6678359                                                                                                                                                                                                                                                                                                                                                                                                                                     | N-Term(iTRAQ4plex), C5(Methylthio)                                  | 1784.86980 | 102 | 112 |      | 5.40 | Expt2 |
| SLETENSALQLOVTER                 | 13  | 188219589                                                                                                                                                                                                                                                                                                                                                                                                                                   | N-Term(iTRAQ4plex)                                                  | 1962.02434 | 102 | 105 |      | 6.59 | Expt2 |
| DEQGSAAEDSESPDTEAVR              | 7   | 34328485                                                                                                                                                                                                                                                                                                                                                                                                                                    | N-Term(iTRAQ4plex)                                                  | 2120.96880 | 102 | 124 |      | 6.31 | Expt2 |
| NPFVLGANLNGGER                   | 53  | 160707889                                                                                                                                                                                                                                                                                                                                                                                                                                   | N-Term(iTRAQ4plex), N10(Deamidated)                                 | 1602.83391 | 102 | 76  |      | 5.35 | Expt2 |
| VSNAGSMSVSLVADENPFAQALR          | 13  | 28916693                                                                                                                                                                                                                                                                                                                                                                                                                                    | N-Term(iTRAQ4plex), N3(Deamidated)                                  | 2622.29880 | 102 | 100 |      | 6.46 | Expt2 |
| EQLTLFAPLNSVFK                   | 136 | 6678321                                                                                                                                                                                                                                                                                                                                                                                                                                     | N-Term(iTRAQ4plex), K14(iTRAQ4plex)                                 | 1895.09001 | 101 | 79  | 1.10 | 5.94 | Expt2 |
| VEVSAPDVSIEGSEK                  | 11  | 61743961                                                                                                                                                                                                                                                                                                                                                                                                                                    | N-Term(iTRAQ4plex), K16(iTRAQ4plex)                                 | 1890.99492 | 101 | 112 |      | 4.96 | Expt2 |
| LSGSNPYTTVPOHINSK                | 23  | 11230802                                                                                                                                                                                                                                                                                                                                                                                                                                    | N-Term(iTRAQ4plex), K18(iTRAQ4plex)                                 | 2208.22190 | 101 | 79  |      | 6.29 | Expt2 |
| GPSVDVEVPDVLDCPDAK               | 23  | 61743961                                                                                                                                                                                                                                                                                                                                                                                                                                    | N-Term(iTRAQ4plex), C15(Methylthio), K19(iTRAQ4plex)                | 2318.11650 | 101 | 95  |      | 5.86 | Expt2 |
| YLAEVATGDDK                      | 22  | 134023662                                                                                                                                                                                                                                                                                                                                                                                                                                   | N-Term(iTRAQ4plex), K11(iTRAQ4plex)                                 | 1469.77458 | 101 | 84  | 1.18 | 4.45 | Expt2 |
| GIQDVYVLSSEQGLLLK                | 8   | 239052674                                                                                                                                                                                                                                                                                                                                                                                                                                   | N-Term(iTRAQ4plex), K17(iTRAQ4plex)                                 | 2191.25827 | 101 | 60  |      | 6.15 | Expt2 |
| MSINAEDVVVGLDLEVK                | 5   | 21450277                                                                                                                                                                                                                                                                                                                                                                                                                                    | N-Term(iTRAQ4plex), M1(Oxidation), K17(iTRAQ4plex)                  | 2121.14316 | 101 | 61  |      | 5.76 | Expt2 |
| EGDVLTLLESER                     | 33  | 149255324;149254491                                                                                                                                                                                                                                                                                                                                                                                                                         | N-Term(iTRAQ4plex)                                                  | 1504.80303 | 101 | 76  |      | 4.53 | Expt2 |
| QCANLQAAIADEAQR                  | 60  | 51092301;54607171;113195684                                                                                                                                                                                                                                                                                                                                                                                                                 | N-Term(iTRAQ4plex), C2(Methylthio)                                  | 1791.86174 | 101 | 85  | 1.23 | 6.23 | Expt2 |
| LVAIVDVIDNDR                     | 49  | 149257159;13385472                                                                                                                                                                                                                                                                                                                                                                                                                          | N-Term(iTRAQ4plex)                                                  | 1498.87273 | 101 | 75  |      | 4.60 | Expt2 |
| LPNGLVIALENYAPLSR                | 5   | 22267442                                                                                                                                                                                                                                                                                                                                                                                                                                    | N-Term(iTRAQ4plex), N3(Deamidated)                                  | 2072.15549 | 101 | 71  |      | 5.90 | Expt2 |
| TVGLLPPONIHIFDEWYTR              | 9   | 111074529                                                                                                                                                                                                                                                                                                                                                                                                                                   | N-Term(iTRAQ4plex)                                                  | 2443.28830 | 101 | 43  |      | 6.12 | Expt2 |
| NLQPDTPYTIIVPVYTEGDDGR           | 66  | 111074529                                                                                                                                                                                                                                                                                                                                                                                                                                   | N-Term(iTRAQ4plex)                                                  | 2636.33867 | 101 | 98  | 0.99 | 5.74 | Expt2 |
| ACADATLSQITNNDIPVGR              | 14  | 6680045                                                                                                                                                                                                                                                                                                                                                                                                                                     | N-Term(iTRAQ4plex), C2(Methylthio)                                  | 2149.05210 | 101 | 87  | 1.16 | 6.10 | Expt2 |
| QVTTITGSAASISLAQYLINAR           | 6   | 6754994                                                                                                                                                                                                                                                                                                                                                                                                                                     | N-Term(iTRAQ4plex)                                                  | 2321.30509 | 101 | 101 |      | 6.30 | Expt2 |
| NMAEQIIEISYQVQSK                 | 107 | 6678359                                                                                                                                                                                                                                                                                                                                                                                                                                     | N-Term(iTRAQ4plex), K17(iTRAQ4plex)                                 | 2297.20928 | 101 | 104 | 1.18 | 7.55 | Expt2 |
| VLLFSDGNSQGATAEAIEK              | 75  | 6753484                                                                                                                                                                                                                                                                                                                                                                                                                                     | N-Term(iTRAQ4plex), N8(Deamidated), K19(iTRAQ4plex)                 | 2239.16948 | 101 | 136 | 0.99 | 7.81 | Expt2 |
| ADIVFLTDAWSIGDDNFNK              | 19  | 111074529                                                                                                                                                                                                                                                                                                                                                                                                                                   | N-Term(iTRAQ4plex), K20(iTRAQ4plex)                                 | 2516.25640 | 101 | 122 |      | 6.69 | Expt2 |
| TIGGGDDSFNTFFSETGAGK             | 44  | 6755901;34740335;6678465;6678469                                                                                                                                                                                                                                                                                                                                                                                                            | N-Term(iTRAQ4plex), K20(iTRAQ4plex)                                 | 2296.09868 | 101 | 121 | 1.67 | 6.70 | Expt2 |
| TLLELAGESDVSTAIIDLK              | 78  | 6678321                                                                                                                                                                                                                                                                                                                                                                                                                                     | N-Term(iTRAQ4plex), K19(iTRAQ4plex)                                 | 2276.28545 | 101 | 105 |      | 7.01 | Expt2 |
| VNSAQLLQIDNAR                    | 365 | 149262636;118130981                                                                                                                                                                                                                                                                                                                                                                                                                         | N-Term(iTRAQ4plex), N3(Deamidated)                                  | 1699.95220 | 100 | 104 | 1.55 | 6.17 | Expt2 |
| AFGAPGEAFSEPEELFANSMGK           | 20  | 130502130                                                                                                                                                                                                                                                                                                                                                                                                                                   | N-Term(iTRAQ4plex), M21(Oxidation), K23(iTRAQ4plex)                 | 2703.32718 | 100 | 69  |      | 6.59 | Expt2 |
| GAVYSFDPVGSYQR                   | 18  | 7242197                                                                                                                                                                                                                                                                                                                                                                                                                                     | N-Term(iTRAQ4plex)                                                  | 1689.83611 | 100 | 78  |      | 4.56 | Expt2 |
| LASVPAGGAVAVASAPGSAAAPAGSAPAAAEK | 15  | 149263166;83745120                                                                                                                                                                                                                                                                                                                                                                                                                          | N-Term(iTRAQ4plex), K33(iTRAQ4plex)                                 | 3062.63926 | 100 | 68  |      | 7.16 | Expt2 |
| LIDDYGVEEPAELPEGTSLVDNK          | 3   | 149269973;149269975;149269977                                                                                                                                                                                                                                                                                                                                                                                                               | N-Term(iTRAQ4plex), K25(iTRAQ4plex)                                 | 3021.50077 | 100 | 73  |      | 6.18 | Expt2 |
| LISWYDNEYGYSNR                   | 33  | 149248895;149249564;149249566;149250207;149251040;149251044;149251140;149251223;149251463;149251509;149251903;149251905;149251911;149251964;149251966;149252413;149253819;149253823;149257623;149258770;149258772;149258934;149258938;149259607;149259652;149259964;149260709;149260711;149260720;94387946;149263021;149265154;149265502;149265922;149266302;149266427;149266431;149268472;149268967;82996390;149273204;149274387;149275059 | N-Term(iTRAQ4plex)                                                  | 1923.89922 | 100 | 85  |      | 5.45 | Expt2 |

|                            |     |                                                                                                                                                                                                       |                                                      |            |     |     |      |      |       |
|----------------------------|-----|-------------------------------------------------------------------------------------------------------------------------------------------------------------------------------------------------------|------------------------------------------------------|------------|-----|-----|------|------|-------|
| NIQVYNPTNSLDVR             | 92  | 111074529                                                                                                                                                                                             | N-Term(iTRAQ4plex), N10(Deamidated)                  | 1874.97368 | 100 | 95  | 1.21 | 5.77 | Expt2 |
| IINEPTAAAIAYGLDR           | 87  | 124339829;124339826                                                                                                                                                                                   | N-Term(iTRAQ4plex)                                   | 1832.00859 | 100 | 85  |      | 7.02 | Expt2 |
| STGEAFVQFASQIEAEK          | 24  | 9845253;10946928                                                                                                                                                                                      | N-Term(iTRAQ4plex), K17(iTRAQ4plex)                  | 2130.09830 | 100 | 71  | 1.10 | 6.28 | Expt2 |
| AADEEAFEDNSEYLR            | 8   | 12963737                                                                                                                                                                                              | N-Term(iTRAQ4plex)                                   | 2031.88848 | 100 | 87  |      | 5.77 | Expt2 |
| SFFPEEISSMWLTK             | 53  | 124339829;124339826                                                                                                                                                                                   | N-Term(iTRAQ4plex), K14(iTRAQ4plex)                  | 1903.01933 | 100 | 101 |      | 5.81 | Expt2 |
| FDQLFDDESDPFVLK            | 12  | 165932375;165932379;165932377;165932381                                                                                                                                                               | N-Term(iTRAQ4plex), K16(iTRAQ4plex)                  | 2232.09940 | 100 | 76  |      | 6.25 | Expt2 |
| TAFDEAIEALDTLNEESYK        | 10  | 31543974                                                                                                                                                                                              | N-Term(iTRAQ4plex), K19(iTRAQ4plex)                  | 2447.21097 | 100 | 75  |      | 7.56 | Expt2 |
| ISMPDIDLNLK                | 26  | 61743961                                                                                                                                                                                              | N-Term(iTRAQ4plex), K11(iTRAQ4plex)                  | 1546.88115 | 100 | 89  |      | 5.07 | Expt2 |
| ISMPDLNLNLK                | 27  | 61743961                                                                                                                                                                                              | N-Term(iTRAQ4plex), N7(Deamidated), K11(iTRAQ4plex)  | 1546.88115 | 100 | 89  |      | 5.07 | Expt2 |
| GPDLGLTALDATNQAIK          | 22  | 6679961                                                                                                                                                                                               | N-Term(iTRAQ4plex), K17(iTRAQ4plex)                  | 2002.07059 | 100 | 91  | 1.61 | 6.85 | Expt2 |
| DVFLGTFLYEYSR              | 39  | 163310765                                                                                                                                                                                             | N-Term(iTRAQ4plex)                                   | 1753.89775 | 100 | 88  |      | 5.54 | Expt2 |
| SVGDGETVEFDVVEGEG          | 16  | 149252935;149262189;20806532;47059495;117956377;113205059                                                                                                                                             | N-Term(iTRAQ4plex), K17(iTRAQ4plex)                  | 2084.02617 | 100 | 116 | 0.98 | 6.60 | Expt2 |
| VPTPNVSWDLTCR              | 58  | 149248895;149249272;149251040;149251044;149251911;149251964;149251966;149252413;149258770;149258772;149259607;149263021;149265154;149266302;149266427;149266431;149268472;149273204;149275059;6679939 | N-Term(iTRAQ4plex), C13(Methylthio)                  | 1689.88078 | 100 | 94  |      | 4.79 | Expt2 |
| LAGTOPLVLEAVOR             | 49  | 6678483                                                                                                                                                                                               | N-Term(iTRAQ4plex)                                   | 1768.01177 | 100 | 87  | 1.39 | 5.71 | Expt2 |
| FSINTDDIMGTSLTVR           | 93  | 148277039                                                                                                                                                                                             | N-Term(iTRAQ4plex), M9(Oxidation)                    | 1929.97405 | 100 | 103 |      | 5.88 | Expt2 |
| VAVLGASGGIGQPLSLLK         | 20  | 31982186                                                                                                                                                                                              | N-Term(iTRAQ4plex), K19(iTRAQ4plex)                  | 2081.29996 | 100 | 89  | 0.99 | 6.76 | Expt2 |
| TLYLSLEIVFPFLGDSTVTK       | 6   | 110625683                                                                                                                                                                                             | N-Term(iTRAQ4plex), K20(iTRAQ4plex)                  | 2519.39554 | 99  | 61  |      | 6.29 | Expt2 |
| SSLSSAOADFNQLAELDR         | 10  | 115496850                                                                                                                                                                                             | N-Term(iTRAQ4plex)                                   | 2096.04106 | 99  | 111 |      | 7.17 | Expt2 |
| LSLODAVNGQLIDQDMATR        | 34  | 82950147;82950149;149264086                                                                                                                                                                           | N-Term(iTRAQ4plex), M16(Oxidation)                   | 2248.14067 | 99  | 104 | 0.98 | 6.98 | Expt2 |
| ILPDDLQONLIVSNTEAPGDDK     | 5   | 7305007                                                                                                                                                                                               | N-Term(iTRAQ4plex), K23(iTRAQ4plex)                  | 2754.44510 | 99  | 78  |      | 6.70 | Expt2 |
| LSAEDLVLEGAGLR             | 4   | 153791270                                                                                                                                                                                             | N-Term(iTRAQ4plex)                                   | 1586.88872 | 99  | 88  |      | 4.58 | Expt2 |
| AEAGASGATFQFR              | 11  | 13399310                                                                                                                                                                                              | N-Term(iTRAQ4plex)                                   | 1585.77373 | 99  | 88  |      | 5.70 | Expt2 |
| ILDSVGEADDDR               | 20  | 83745120                                                                                                                                                                                              | N-Term(iTRAQ4plex)                                   | 1561.78337 | 99  | 86  |      | 4.95 | Expt2 |
| ETVSEENSVLCLSK             | 14  | 149253258;33859482                                                                                                                                                                                    | N-Term(iTRAQ4plex), C11(Methylthio), K14(iTRAQ4plex) | 1871.93523 | 99  | 109 |      | 6.20 | Expt2 |
| DTPVLSLEPEPVVAR            | 14  | 160707889                                                                                                                                                                                             | N-Term(iTRAQ4plex)                                   | 1765.98430 | 99  | 93  |      | 4.59 | Expt2 |
| LVLQFSPDITLTK              | 7   | 125628659                                                                                                                                                                                             | N-Term(iTRAQ4plex), K12(iTRAQ4plex)                  | 1649.97832 | 99  | 90  |      | 4.00 | Expt2 |
| AEQPEVDVNLPK               | 9   | 61743961                                                                                                                                                                                              | N-Term(iTRAQ4plex), K12(iTRAQ4plex)                  | 1555.86028 | 99  | 70  |      | 4.83 | Expt2 |
| VGINDFCPMGFGVK             | 60  | 20137008                                                                                                                                                                                              | N-Term(iTRAQ4plex), C7(Methylthio), K14(iTRAQ4plex)  | 1817.90666 | 99  | 92  | 1.23 | 6.06 | Expt2 |
| ADLEAQLLETLTELAYMK         | 247 | 118130981                                                                                                                                                                                             | N-Term(iTRAQ4plex), K18(iTRAQ4plex)                  | 2356.22466 | 99  | 121 | 1.51 | 7.75 | Expt2 |
| TLFSSQIEELNLPK             | 28  | 148747546                                                                                                                                                                                             | N-Term(iTRAQ4plex), K14(iTRAQ4plex)                  | 1907.07914 | 99  | 93  | 1.08 | 5.82 | Expt2 |
| DLVSSLTSGLLTIGDR           | 11  | 29293809                                                                                                                                                                                              | N-Term(iTRAQ4plex)                                   | 1791.00371 | 99  | 115 |      | 5.66 | Expt2 |
| YALYDASFETK                | 33  | 9790219                                                                                                                                                                                               | N-Term(iTRAQ4plex), K11(iTRAQ4plex)                  | 1595.82305 | 99  | 79  | 0.99 | 4.88 | Expt2 |
| DTPFPNAWQGGQETQVEAK        | 24  | 160707889                                                                                                                                                                                             | N-Term(iTRAQ4plex), K20(iTRAQ4plex)                  | 2520.22611 | 99  | 84  |      | 5.95 | Expt2 |
| GVNLPGAAVDLPVASEK          | 18  | 31981562                                                                                                                                                                                              | N-Term(iTRAQ4plex), K17(iTRAQ4plex)                  | 1925.09697 | 99  | 107 |      | 5.79 | Expt2 |
| LOVELDSVTGLLSQSDSK         | 19  | 114326446                                                                                                                                                                                             | N-Term(iTRAQ4plex), K18(iTRAQ4plex)                  | 2207.20823 | 99  | 96  |      | 6.24 | Expt2 |
| VGLTNYAAAYCTGLLLAR         | 11  | 94362762;149233658;149257749                                                                                                                                                                          | N-Term(iTRAQ4plex), C11(Methylthio)                  | 2060.08408 | 99  | 98  |      | 6.02 | Expt2 |
| ISLGGACGAGGYGSR            | 297 | 20911031                                                                                                                                                                                              | N-Term(iTRAQ4plex), C7(Methylthio)                   | 1515.71599 | 99  | 110 | 1.07 | 6.27 | Expt2 |
| LPSGSGPASPTTGSVAVDIR       | 19  | 61743961                                                                                                                                                                                              | N-Term(iTRAQ4plex)                                   | 1914.00286 | 99  | 103 |      | 7.05 | Expt2 |
| GDEGEVGDGPDENDNISPR        | 44  | 6753484                                                                                                                                                                                               | N-Term(iTRAQ4plex)                                   | 2115.91806 | 99  | 94  |      | 5.45 | Expt2 |
| AEVONLGGELVSVSGDSAMSLIOAAK | 3   | 6753294                                                                                                                                                                                               | N-Term(iTRAQ4plex), K26(iTRAQ4plex)                  | 2874.54673 | 99  | 97  |      | 7.50 | Expt2 |
| NSDVEIFAVGVK               | 63  | 111074529                                                                                                                                                                                             | N-Term(iTRAQ4plex), K12(iTRAQ4plex)                  | 1565.87859 | 98  | 97  |      | 5.33 | Expt2 |
| LDGNPLTQSSLPDMEYCLR        | 52  | 160333372                                                                                                                                                                                             | N-Term(iTRAQ4plex), C18(Methylthio)                  | 2439.15386 | 98  | 100 |      | 6.04 | Expt2 |
| AGTOIENIDEDFR              | 22  | 11230802                                                                                                                                                                                              | N-Term(iTRAQ4plex)                                   | 1651.80303 | 98  | 81  |      | 5.37 | Expt2 |
| NLDLDSIIAEVK               | 24  | 22164776                                                                                                                                                                                              | N-Term(iTRAQ4plex), K12(iTRAQ4plex)                  | 1617.93328 | 98  | 88  |      | 5.05 | Expt2 |
| VPDVLCECPDAK               | 7   | 61743961                                                                                                                                                                                              | N-Term(iTRAQ4plex), C8(Methylthio), K12(iTRAQ4plex)  | 1634.80559 | 98  | 83  |      | 4.08 | Expt2 |
| TDLEMOIEQLNEELAYLK         | 10  | 226823220                                                                                                                                                                                             | N-Term(iTRAQ4plex), M5(Oxidation), K18(iTRAQ4plex)   | 2484.28708 | 98  | 69  | 1.41 | 6.80 | Expt2 |
| DMDLIDVNEAFAPQLSVOK        | 3   | 29126205                                                                                                                                                                                              | N-Term(iTRAQ4plex), K20(iTRAQ4plex)                  | 2568.33286 | 98  | 64  |      | 6.04 | Expt2 |
| AGTGVDNVLEAAATR            | 11  | 52353955                                                                                                                                                                                              | N-Term(iTRAQ4plex)                                   | 1632.83281 | 98  | 95  |      | 5.70 | Expt2 |
| LQWMAGGFTTGEALQYTR         | 23  | 6753484                                                                                                                                                                                               | N-Term(iTRAQ4plex), M4(Oxidation)                    | 2190.08127 | 98  | 86  |      | 6.22 | Expt2 |
| DLFEDELWPLFEK              | 6   | 114145493;29788787                                                                                                                                                                                    | N-Term(iTRAQ4plex), K13(iTRAQ4plex)                  | 1882.00969 | 98  | 74  |      | 5.67 | Expt2 |
| MQQNIQEELEEEEEESAR         | 16  | 114326446                                                                                                                                                                                             | N-Term(iTRAQ4plex)                                   | 2477.16446 | 98  | 88  |      | 7.46 | Expt2 |

|                                  |     |                                         |                                                      |            |    |     |      |      |       |
|----------------------------------|-----|-----------------------------------------|------------------------------------------------------|------------|----|-----|------|------|-------|
| EPCGGLEDVAVNEAK                  | 15  | 6753484                                 | N-Term(iTRAQ4plex), C3(Methylthio), K14(iTRAQ4plex)  | 1765.83159 | 98 | 113 | 0.99 | 5.36 | Expt2 |
| VTPPEGVYDVVTVFR                  | 8   | 158635992                               | N-Term(iTRAQ4plex)                                   | 1722.92351 | 98 | 100 |      | 4.23 | Expt2 |
| TIAIIAEGIPALTR                   | 28  | 29293809                                | N-Term(iTRAQ4plex)                                   | 1712.01482 | 98 | 72  |      | 4.37 | Expt2 |
| LAADVATMNVLASR                   | 16  | 58037267                                | N-Term(iTRAQ4plex)                                   | 1703.92790 | 98 | 100 |      | 5.35 | Expt2 |
| NIPGITLLNVSK                     | 27  | 30794450                                | N-Term(iTRAQ4plex), K12(iTRAQ4plex)                  | 1556.96587 | 98 | 71  | 1.26 | 4.72 | Expt2 |
| SVTEOGAELSNR                     | 36  | 149269348;6756041                       | N-Term(iTRAQ4plex)                                   | 1692.81890 | 97 | 93  | 1.10 | 5.79 | Expt2 |
| DAEEVISQTIOTIVDMIK               | 56  | 6753484                                 | N-Term(iTRAQ4plex), M16(Oxidation), K18(iTRAQ4plex)  | 2324.22470 | 97 | 82  | 1.03 | 7.60 | Expt2 |
| IFVGLSPDTPPEEK                   | 36  | 116256518;116256514;116256516;116256512 | N-Term(iTRAQ4plex), K14(iTRAQ4plex)                  | 1776.96550 | 97 | 102 |      | 5.82 | Expt2 |
| VGOPGAAGPVSPMCPGR                | 10  | 7304875                                 | N-Term(iTRAQ4plex), C14(Methylthio)                  | 1770.86162 | 97 | 93  |      | 5.34 | Expt2 |
| IIPGFMCQGGDFTR                   | 75  | 149257773;6679439                       | N-Term(iTRAQ4plex), C7(Methylthio)                   | 1731.81255 | 97 | 87  | 1.17 | 4.93 | Expt2 |
| NADMSSEMDOQDAVDCATQAMEK          | 6   | 18087731;281182473                      | N-Term(iTRAQ4plex), C15(Methylthio), K22(iTRAQ4plex) | 2765.14579 | 97 | 73  |      | 7.36 | Expt2 |
| ALEQANTELEVK                     | 19  | 226823220                               | N-Term(iTRAQ4plex), K12(iTRAQ4plex)                  | 1632.90569 | 97 | 76  |      | 5.30 | Expt2 |
| NALFLCDLAWK                      | 25  | 148277039                               | N-Term(iTRAQ4plex), C5(Methylthio), K11(iTRAQ4plex)  | 1615.82549 | 97 | 101 |      | 4.76 | Expt2 |
| IYVDDGLISLQVK                    | 31  | 31981562                                | N-Term(iTRAQ4plex), K13(iTRAQ4plex)                  | 1751.02800 | 97 | 100 | 0.99 | 5.34 | Expt2 |
| VDNSSLTGESEPOTR                  | 12  | 110225337;21450277;30409956;21450321    | N-Term(iTRAQ4plex)                                   | 1763.85747 | 97 | 82  |      | 5.81 | Expt2 |
| TNELGDGCVGLVQLQGNPTCK            | 12  | 31981748;285402638;285402659            | N-Term(iTRAQ4plex), C21(Methylthio), K22(iTRAQ4plex) | 2547.31766 | 97 | 82  |      | 6.48 | Expt2 |
| SMEAEMIQLEELAAER                 | 10  | 114326446                               | N-Term(iTRAQ4plex)                                   | 2193.07010 | 97 | 81  |      | 5.70 | Expt2 |
| GFDPMTEENLTYLQLK                 | 33  | 82950147;82950149;149264086             | N-Term(iTRAQ4plex), K17(iTRAQ4plex)                  | 2317.20298 | 97 | 73  |      | 6.06 | Expt2 |
| SEDGVEGLGETQSR                   | 12  | 61743961                                | N-Term(iTRAQ4plex)                                   | 1722.79241 | 97 | 103 |      | 5.51 | Expt2 |
| SSITPGTVLIILTGR                  | 34  | 82880886;149274983;84662736             | N-Term(iTRAQ4plex)                                   | 1672.01726 | 97 | 101 | 0.98 | 5.65 | Expt2 |
| ELSGLPSPVSGSPPPPPPPPISTSSGSDSASR | 7   | 157951604                               | N-Term(iTRAQ4plex)                                   | 3762.86196 | 97 | 43  |      | 5.95 | Expt2 |
| LSPYSSPOEFAODVGR                 | 20  | 170295840                               | N-Term(iTRAQ4plex)                                   | 2022.00542 | 97 | 92  |      | 5.09 | Expt2 |
| EDEEESLNEVGYDDIGCCR              | 24  | 225543319;94408011                      | N-Term(iTRAQ4plex), C18(Methylthio)                  | 2318.95273 | 97 | 85  |      | 5.79 | Expt2 |
| ETVVVEPOVTVWEDIGGLEVDK           | 12  | 225543319;94408011                      | N-Term(iTRAQ4plex), K21(iTRAQ4plex)                  | 2630.38913 | 97 | 80  | 1.17 | 5.74 | Expt2 |
| DATLEACAGALONLTSK                | 6   | 9790161                                 | N-Term(iTRAQ4plex), C7(Methylthio), K18(iTRAQ4plex)  | 2111.07622 | 97 | 115 |      | 7.47 | Expt2 |
| GAVPVVOAFDSLNPVAVELK             | 5   | 157951604                               | N-Term(iTRAQ4plex), K22(iTRAQ4plex)                  | 2653.45273 | 97 | 86  |      | 7.95 | Expt2 |
| SYSYPMLESIK                      | 39  | 149260099;6996913                       | N-Term(iTRAQ4plex), K12(iTRAQ4plex)                  | 1720.87859 | 97 | 76  |      | 4.89 | Expt2 |
| GELGPNVGNPGPAGPGR                | 44  | 111120329                               | N-Term(iTRAQ4plex)                                   | 1743.92485 | 97 | 103 |      | 5.88 | Expt2 |
| NOVALNPQNTVDFDAK                 | 53  | 124339829;124339826                     | N-Term(iTRAQ4plex), K15(iTRAQ4plex)                  | 1947.05486 | 96 | 110 |      | 5.68 | Expt2 |
| ELAEDGYSVGEVR                    | 23  | 6755372                                 | N-Term(iTRAQ4plex)                                   | 1567.77434 | 96 | 74  |      | 5.05 | Expt2 |
| EFADSLGIPFLETSK                  | 22  | 6679587                                 | N-Term(iTRAQ4plex), K16(iTRAQ4plex)                  | 2013.07744 | 96 | 113 |      | 5.35 | Expt2 |
| GLVYETSLVDPDEGIR                 | 34  | 13385942;269973935                      | N-Term(iTRAQ4plex)                                   | 1906.99187 | 96 | 100 |      | 5.19 | Expt2 |
| LQIWDTAGQESFR                    | 5   | 30525051;10946940                       | N-Term(iTRAQ4plex)                                   | 1694.86455 | 96 | 70  |      | 4.60 | Expt2 |
| LVSIGAEIIVDGNK                   | 21  | 11230802                                | N-Term(iTRAQ4plex), K15(iTRAQ4plex)                  | 1803.01787 | 96 | 128 |      | 5.33 | Expt2 |
| SAPDFTATAVVDGAFK                 | 25  | 148747558                               | N-Term(iTRAQ4plex), K16(iTRAQ4plex)                  | 1885.00310 | 96 | 125 | 0.99 | 5.18 | Expt2 |
| GLGTDEDAIIGILAYR                 | 11  | 161016799                               | N-Term(iTRAQ4plex)                                   | 1820.99578 | 96 | 104 |      | 5.82 | Expt2 |
| GSADPEEESVLYSNR                  | 3   | 13385500                                | N-Term(iTRAQ4plex)                                   | 1796.84184 | 96 | 96  |      | 4.98 | Expt2 |
| ELIQTALNFLTPLR                   | 6   | 9507097                                 | N-Term(iTRAQ4plex)                                   | 1860.07891 | 96 | 94  |      | 5.15 | Expt2 |
| AFSGLTQNPESIELR                  | 19  | 6755781                                 | N-Term(iTRAQ4plex)                                   | 1805.95513 | 96 | 87  | 0.98 | 6.12 | Expt2 |
| TFVOENVYDFEVR                    | 22  | 6753036                                 | N-Term(iTRAQ4plex)                                   | 1918.92839 | 96 | 91  |      | 5.77 | Expt2 |
| FOVNDNDQLLLR                     | 153 | 148277039                               | N-Term(iTRAQ4plex), N4(Deamidated)                   | 1746.93059 | 96 | 87  |      | 6.10 | Expt2 |
| EFSITDVPVPISLR                   | 15  | 112293266                               | N-Term(iTRAQ4plex)                                   | 1880.03447 | 96 | 73  |      | 4.67 | Expt2 |
| ADPEAAWEPTAEAR                   | 3   | 7709986                                 | N-Term(iTRAQ4plex)                                   | 1786.83940 | 96 | 94  |      | 4.46 | Expt2 |
| VALVYGOMNEPPGAR                  | 61  | 31980648                                | N-Term(iTRAQ4plex)                                   | 1745.91435 | 96 | 87  | 1.23 | 5.01 | Expt2 |
| AVFVDEPTVIDEIR                   | 19  | 6678467                                 | N-Term(iTRAQ4plex)                                   | 1860.02983 | 96 | 98  |      | 4.77 | Expt2 |
| SLEYLDLSFNOMSK                   | 68  | 160333372                               | N-Term(iTRAQ4plex), M12(Oxidation), K14(iTRAQ4plex)  | 1979.00994 | 96 | 78  |      | 5.93 | Expt2 |
| AFGAPGEAFSEPEEILFANSMGK          | 25  | 130502130                               | N-Term(iTRAQ4plex), K23(iTRAQ4plex)                  | 2687.33061 | 96 | 100 |      | 7.09 | Expt2 |
| VPSTEAALASSLMGLFEK               | 12  | 116089273                               | N-Term(iTRAQ4plex), K19(iTRAQ4plex)                  | 2268.20725 | 96 | 73  | 1.37 | 7.01 | Expt2 |
| DAEDAMDAMDGAVLDGR                | 14  | 6755478                                 | N-Term(iTRAQ4plex)                                   | 1895.82292 | 96 | 111 | 1.47 | 5.58 | Expt2 |
| ADLEAQLTLTEELAYMK                | 174 | 118130981                               | N-Term(iTRAQ4plex), M17(Oxidation), K18(iTRAQ4plex)  | 2372.22489 | 96 | 91  | 1.31 | 8.03 | Expt2 |
| LPIGDVATQYFADR                   | 13  | 238814391                               | N-Term(iTRAQ4plex)                                   | 1709.90190 | 96 | 89  | 1.02 | 4.76 | Expt2 |
| AIFLADGNVFTGFSR                  | 19  | 94394941;31542413                       | N-Term(iTRAQ4plex)                                   | 1859.98052 | 96 | 96  |      | 5.24 | Expt2 |
| VDALMDEINFMK                     | 155 | 20911031                                | N-Term(iTRAQ4plex), M11(Oxidation), K12(iTRAQ4plex)  | 1729.88335 | 95 | 96  |      | 5.29 | Expt2 |
| GGNTLTGMALNIFR                   | 68  | 111074529                               | N-Term(iTRAQ4plex)                                   | 1608.86980 | 95 | 96  |      | 5.46 | Expt2 |
| SSFFVNLTLGGQK                    | 38  | 6755040                                 | N-Term(iTRAQ4plex), N6(Deamidated), K14(iTRAQ4plex)  | 1743.95549 | 95 | 93  |      | 5.29 | Expt2 |

|                                             |     |                                                     |                                                      |            |    |     |      |      |       |
|---------------------------------------------|-----|-----------------------------------------------------|------------------------------------------------------|------------|----|-----|------|------|-------|
| GFEVVMTEPIDEYCVQQLK                         | 7   | 40556608                                            | N-Term(iTRAQ4plex), C15(Methylthio), K20(iTRAQ4plex) | 2725.31998 | 95 | 70  | 1.18 | 6.27 | Expt2 |
| EILGTAQSGVGNVDGR                            | 27  | 149251813;94390243;149262832;94407735;160333553     | N-Term(iTRAQ4plex), C11(Methylthio)                  | 1808.87602 | 95 | 110 |      | 5.32 | Expt2 |
| VTNGAFTGEISPGMIK                            | 25  | 226958349                                           | N-Term(iTRAQ4plex), N3(Deamidated), K16(iTRAQ4plex)  | 1911.01506 | 95 | 99  | 1.39 | 5.59 | Expt2 |
| TEFLSFMNTELAFTK                             | 13  | 149263303;94404308;21886811                         | N-Term(iTRAQ4plex), M7(Oxidation), K16(iTRAQ4plex)   | 2154.11203 | 95 | 80  |      | 5.77 | Expt2 |
| AEVTAFTNSIDAELR                             | 31  | 112421039                                           | N-Term(iTRAQ4plex)                                   | 1780.92558 | 95 | 95  |      | 5.92 | Expt2 |
| VFEVSLADLQNDVAFR                            | 24  | 94395665;149265827;254553321                        | N-Term(iTRAQ4plex)                                   | 2096.08525 | 95 | 116 |      | 5.83 | Expt2 |
| ISLGLPVGAVINACADNTGAK                       | 18  | 12584986;149255181;149255570;149269218              | N-Term(iTRAQ4plex), C13(Methylthio), K20(iTRAQ4plex) | 2247.21549 | 95 | 81  |      | 6.12 | Expt2 |
| EITALAPSTMK                                 | 72  | 6671509;6752954;6671507;157823889;14192922;33563240 | N-Term(iTRAQ4plex), K11(iTRAQ4plex)                  | 1449.82744 | 95 | 66  |      | 4.17 | Expt2 |
| ANLQIDQINTDLNLER                            | 33  | 114326446                                           | N-Term(iTRAQ4plex)                                   | 2014.06999 | 95 | 96  |      | 5.29 | Expt2 |
| SAIQLEEEYENLLK                              | 12  | 82950147;82950149;149264086                         | N-Term(iTRAQ4plex), K15(iTRAQ4plex)                  | 2130.11919 | 95 | 99  | 1.42 | 6.41 | Expt2 |
| NIGVEVFSLGIK                                | 69  | 111074529                                           | N-Term(iTRAQ4plex), K12(iTRAQ4plex)                  | 1563.93974 | 95 | 99  | 1.16 | 5.37 | Expt2 |
| EESGAVAAAAASVPAQSTAR                        | 7   | 165377185                                           | N-Term(iTRAQ4plex)                                   | 1916.98332 | 95 | 118 |      | 6.22 | Expt2 |
| YTPSGOSGAAASELSFINHAY                       | 11  | 6671539                                             | N-Term(iTRAQ4plex)                                   | 2402.14341 | 95 | 65  |      | 7.28 | Expt2 |
| ITVDPPTDGPTK                                | 16  | 111074529                                           | N-Term(iTRAQ4plex), K12(iTRAQ4plex)                  | 1532.84136 | 95 | 90  |      | 4.38 | Expt2 |
| FLDGNELTLADCNLLPK                           | 6   | 15617203                                            | N-Term(iTRAQ4plex), C12(Methylthio), K17(iTRAQ4plex) | 2210.15165 | 95 | 90  |      | 6.75 | Expt2 |
| NTSEQDQPMGGWEMIR                            | 12  | 188219589                                           | N-Term(iTRAQ4plex)                                   | 2022.90984 | 95 | 96  |      | 5.33 | Expt2 |
| EYFGGFEVESIELPMDNK                          | 8   | 116256518;116256514;116256516;116256512             | N-Term(iTRAQ4plex), K19(iTRAQ4plex)                  | 2449.18828 | 95 | 101 |      | 6.66 | Expt2 |
| AFLSVMASPOSICGLR                            | 25  | 148277039                                           | N-Term(iTRAQ4plex), C13(Methylthio)                  | 1869.95452 | 95 | 75  |      | 6.13 | Expt2 |
| TPAQYDASELK                                 | 11  | 149260099;6996913                                   | N-Term(iTRAQ4plex), K11(iTRAQ4plex)                  | 1510.80510 | 95 | 73  |      | 4.71 | Expt2 |
| VTWAPPSIELTNLLVR                            | 16  | 46849812                                            | N-Term(iTRAQ4plex)                                   | 2050.18576 | 95 | 83  | 0.99 | 6.19 | Expt2 |
| VIAINVDDPDAANYK                             | 14  | 27754065                                            | N-Term(iTRAQ4plex), K15(iTRAQ4plex)                  | 1906.02080 | 95 | 91  | 1.21 | 5.18 | Expt2 |
| SWQDELAQAAEGSAR                             | 3   | 31982233                                            | N-Term(iTRAQ4plex)                                   | 1948.90837 | 95 | 86  |      | 5.11 | Expt2 |
| FQEEADSVQTLAK                               | 18  | 111185907                                           | N-Term(iTRAQ4plex), K14(iTRAQ4plex)                  | 1840.95745 | 95 | 104 |      | 4.76 | Expt2 |
| SDDPQQYLILNTAR                              | 7   | 13928670                                            | N-Term(iTRAQ4plex)                                   | 1892.94255 | 95 | 92  |      | 4.73 | Expt2 |
| FAMEPEEFDSDLR                               | 17  | 86198316                                            | N-Term(iTRAQ4plex)                                   | 1830.84026 | 94 | 93  |      | 5.04 | Expt2 |
| VALTGLTVAEYFR                               | 41  | 31980648                                            | N-Term(iTRAQ4plex)                                   | 1583.89250 | 94 | 75  |      | 5.38 | Expt2 |
| TLQGLEIELOSLSMK                             | 21  | 6754480;6680606;226823220                           | N-Term(iTRAQ4plex), M15(Oxidation), K16(iTRAQ4plex)  | 2122.17569 | 94 | 79  |      | 6.62 | Expt2 |
| IFVESYVDFVK                                 | 16  | 85861182                                            | N-Term(iTRAQ4plex), K13(iTRAQ4plex)                  | 1891.99639 | 94 | 94  |      | 5.21 | Expt2 |
| SLPASLVPEPDMTDFAK                           | 18  | 6678483                                             | N-Term(iTRAQ4plex), K18(iTRAQ4plex)                  | 2255.19023 | 94 | 113 |      | 6.27 | Expt2 |
| QVVDASAYEVIK                                | 13  | 6754524;257743039                                   | N-Term(iTRAQ4plex), K11(iTRAQ4plex)                  | 1538.86797 | 94 | 88  |      | 5.36 | Expt2 |
| EGVYTVFAPTNEAFQAMPPEELNK                    | 24  | 6678321                                             | N-Term(iTRAQ4plex), K24(iTRAQ4plex)                  | 2970.48191 | 94 | 68  |      | 6.59 | Expt2 |
| TTAENEVFMK                                  | 130 | 20911031                                            | N-Term(iTRAQ4plex), K11(iTRAQ4plex)                  | 1570.84062 | 94 | 88  | 1.29 | 5.66 | Expt2 |
| DILAHLGMLDPVEK                              | 38  | 6671549                                             | N-Term(iTRAQ4plex), M8(Oxidation), K14(iTRAQ4plex)   | 1831.05608 | 94 | 83  | 1.05 | 5.47 | Expt2 |
| DLTADTEYQISVFAFK                            | 66  | 111074529                                           | N-Term(iTRAQ4plex), K16(iTRAQ4plex)                  | 2120.08159 | 94 | 100 |      | 5.48 | Expt2 |
| GMSLNLEPNDVGVVFGNDK                         | 15  | 6680748                                             | N-Term(iTRAQ4plex), K20(iTRAQ4plex)                  | 2392.25132 | 94 | 79  |      | 5.73 | Expt2 |
| DYLGDFIEHYAQLGPSOPDLAQADQDEPR               | 10  | 149269973;149269975;149269977                       | N-Term(iTRAQ4plex)                                   | 3414.63572 | 94 | 89  |      | 7.70 | Expt2 |
| LIVDEAINEDNSVVSLSQPK                        | 14  | 225543319;94408011                                  | N-Term(iTRAQ4plex), K20(iTRAQ4plex)                  | 2458.32694 | 94 | 77  |      | 5.71 | Expt2 |
| GALQYLVILTQTLTK                             | 15  | 88014720                                            | N-Term(iTRAQ4plex), K16(iTRAQ4plex)                  | 2047.24546 | 94 | 64  |      | 5.81 | Expt2 |
| ALANVNIQSILICNVGAGGPAPAAGAAPAGGAAPSTAAAPAEK | 8   | 9256519                                             | N-Term(iTRAQ4plex), C12(Methylthio), K43(iTRAQ4plex) | 4060.09463 | 94 | 61  |      | 9.21 | Expt2 |
| ILPDTPOEPFALWEILNK                          | 3   | 226423922                                           | N-Term(iTRAQ4plex), K18(iTRAQ4plex)                  | 2412.34604 | 94 | 49  |      | 7.14 | Expt2 |
| VDIEGPNVNIIEGPEGK                           | 11  | 61743961                                            | N-Term(iTRAQ4plex), K16(iTRAQ4plex)                  | 1955.03948 | 94 | 95  |      | 5.23 | Expt2 |
| SGSLSLTQFADMISLK                            | 16  | 82950147;82950149;149264086                         | N-Term(iTRAQ4plex), K16(iTRAQ4plex)                  | 1986.08953 | 93 | 99  |      | 5.80 | Expt2 |
| ISFDQDITFESEFYLDEK                          | 13  | 160333710;148747546                                 | N-Term(iTRAQ4plex), K18(iTRAQ4plex)                  | 2498.19669 | 93 | 60  | 0.98 | 5.87 | Expt2 |
| SLSSEILIGELSAADFDR                          | 10  | 33563246                                            | N-Term(iTRAQ4plex)                                   | 2011.99858 | 93 | 106 |      | 4.99 | Expt2 |
| NLEAVETLGTSTICSDK                           | 7   | 21450277;30409956;226958351;21450321                | N-Term(iTRAQ4plex), C15(Methylthio), K18(iTRAQ4plex) | 2202.08695 | 93 | 58  |      | 5.12 | Expt2 |
| OLLOANPILEAFGNK                             | 42  | 29336026;114326446;241982716;241982718              | N-Term(iTRAQ4plex), K16(iTRAQ4plex)                  | 2015.16008 | 93 | 107 |      | 5.48 | Expt2 |
| WTEYGLTFTEK                                 | 20  | 6755963                                             | N-Term(iTRAQ4plex), K11(iTRAQ4plex)                  | 1662.86821 | 93 | 95  | 1.23 | 4.70 | Expt2 |
| DINAYNGETPEK                                | 14  | 6671549                                             | N-Term(iTRAQ4plex), N6(Deamidated), K13(iTRAQ4plex)  | 1740.85405 | 93 | 70  |      | 5.33 | Expt2 |
| TSIDAYDNDFDNISLAQR                          | 23  | 51491845                                            | N-Term(iTRAQ4plex)                                   | 2087.01885 | 93 | 120 | 1.20 | 5.67 | Expt2 |
| ESYPFLPTVIDGVVLPK                           | 14  | 117553604                                           | N-Term(iTRAQ4plex), K17(iTRAQ4plex)                  | 2162.24302 | 93 | 59  |      | 5.68 | Expt2 |
| NSGIENGAFQGLK                               | 53  | 6681143                                             | N-Term(iTRAQ4plex), N6(Deamidated), K13(iTRAQ4plex)  | 1623.86138 | 93 | 89  |      | 5.84 | Expt2 |
| TOAVAGENIFIK                                | 27  | 157057148;127139277                                 | N-Term(iTRAQ4plex), K12(iTRAQ4plex)                  | 1578.91863 | 93 | 98  | 0.99 | 5.78 | Expt2 |
| QTSVPSAMLVLVK                               | 28  | 149261823;164607147                                 | N-Term(iTRAQ4plex), K13(iTRAQ4plex)                  | 1660.99358 | 93 | 80  |      | 5.82 | Expt2 |

|                            |     |                                                                                                                                                                                    |                                                                                                      |            |    |     |      |      |       |
|----------------------------|-----|------------------------------------------------------------------------------------------------------------------------------------------------------------------------------------|------------------------------------------------------------------------------------------------------|------------|----|-----|------|------|-------|
| IITLAGPTNAIFK              | 11  | 157042772;157041229;157057549                                                                                                                                                      | N-Term(iTRAQ4plex), K13(iTRAQ4plex)                                                                  | 1647.01604 | 93 | 87  |      | 4.75 | Expt2 |
| FSSYSQOMENWSR              | 6   | 9790161                                                                                                                                                                            | N-Term(iTRAQ4plex)                                                                                   | 1665.74626 | 93 | 69  |      | 5.12 | Expt2 |
| NTFAEITGLSPGVTYLFLK        | 8   | 46849812                                                                                                                                                                           | N-Term(iTRAQ4plex), K18(iTRAQ4plex)                                                                  | 2246.23899 | 93 | 64  |      | 6.87 | Expt2 |
| LEEDVLPMEGK                | 18  | 148747546                                                                                                                                                                          | N-Term(iTRAQ4plex), K12(iTRAQ4plex)                                                                  | 1660.91265 | 93 | 102 |      | 4.22 | Expt2 |
| IOEEGTGVEETGK              | 7   | 148277039                                                                                                                                                                          | N-Term(iTRAQ4plex), K13(iTRAQ4plex)                                                                  | 1664.86394 | 93 | 88  |      | 5.76 | Expt2 |
| FSMVIDNGIVK                | 30  | 6755114                                                                                                                                                                            | N-Term(iTRAQ4plex), N7(Deamidated), K11(iTRAQ4plex)                                                  | 1511.84258 | 93 | 84  | 0.97 | 5.38 | Expt2 |
| GSMYDGLADNYYNNGVTTSR       | 27  | 9790161                                                                                                                                                                            | N-Term(iTRAQ4plex)                                                                                   | 2242.97539 | 93 | 100 | 1.26 | 7.01 | Expt2 |
| NALESYAFNMK                | 6   | 124339838;124339829;124339826                                                                                                                                                      | N-Term(iTRAQ4plex), K11(iTRAQ4plex)                                                                  | 1575.81462 | 93 | 82  | 0.99 | 5.14 | Expt2 |
| GGFVQPTVFSNVDEMR           | 23  | 7106242;85861182                                                                                                                                                                   | N-Term(iTRAQ4plex)                                                                                   | 2118.05124 | 93 | 84  | 1.17 | 6.25 | Expt2 |
| IAIAALEVLEENLAENADK        | 11  | 8393866                                                                                                                                                                            | N-Term(iTRAQ4plex), K20(iTRAQ4plex)                                                                  | 2443.32730 | 93 | 61  | 1.09 | 7.80 | Expt2 |
| TQGPYDVVVLPGGNLGAQNLSESPMK | 17  | 55741460                                                                                                                                                                           | N-Term(iTRAQ4plex), K27(iTRAQ4plex)                                                                  | 3058.61972 | 92 | 65  |      | 6.71 | Expt2 |
| GLVLIASFQYLOK              | 61  | 163310765                                                                                                                                                                          | N-Term(iTRAQ4plex), K13(iTRAQ4plex)                                                                  | 1768.07158 | 92 | 94  | 1.36 | 6.35 | Expt2 |
| TALAYECFQDDNSTLALPSDQK     | 12  | 9790161                                                                                                                                                                            | N-Term(iTRAQ4plex), C7(Methylthio), K23(iTRAQ4plex)                                                  | 2892.36673 | 92 | 81  | 1.17 | 6.32 | Expt2 |
| IPAFNLVVDIAGLVK            | 16  | 21313144;76677915                                                                                                                                                                  | N-Term(iTRAQ4plex), K15(iTRAQ4plex)                                                                  | 1857.14897 | 92 | 125 |      | 6.36 | Expt2 |
| LFIGGLSFETDDSLR            | 37  | 82801284;94371439;149252089;82918363;82918359;82954743;149266199;82954739;149266543;149266545;82956957;51769129;149266569;82957137;94400765;149268214;149268216;37674277;157277969 | N-Term(iTRAQ4plex)                                                                                   | 1914.99785 | 92 | 94  |      | 5.60 | Expt2 |
| AVTGYDTPYTDQISLFOAMOR      | 10  | 37537522                                                                                                                                                                           | N-Term(iTRAQ4plex)                                                                                   | 2606.27451 | 92 | 112 | 1.83 | 7.42 | Expt2 |
| TVTNAVVTVPAYFNDSOR         | 67  | 31981690                                                                                                                                                                           | N-Term(iTRAQ4plex)                                                                                   | 2126.10454 | 92 | 97  | 1.16 | 5.54 | Expt2 |
| NPDDITNEEYGEFYK            | 11  | 6754254                                                                                                                                                                            | N-Term(iTRAQ4plex), K15(iTRAQ4plex)                                                                  | 2121.97978 | 92 | 83  | 0.99 | 4.79 | Expt2 |
| EGECCAFPEEYVSPNSEDVGVGEGPK | 67  | 34328108                                                                                                                                                                           | N-Term(iTRAQ4plex), C4(Methylthio), C5(Methylthio), C8(Methylthio), N16(Deamidated), K26(iTRAQ4plex) | 3201.28745 | 92 | 62  | 1.10 | 6.61 | Expt2 |
| NAPAIIFIDELDAIPK           | 27  | 225543319;94408011                                                                                                                                                                 | N-Term(iTRAQ4plex), K17(iTRAQ4plex)                                                                  | 2099.20511 | 92 | 87  | 1.47 | 6.65 | Expt2 |
| GLCAIAQAESLR               | 35  | 6755372                                                                                                                                                                            | N-Term(iTRAQ4plex), C3(Methylthio)                                                                   | 1421.73625 | 92 | 76  | 0.99 | 4.66 | Expt2 |
| DAVLNAWAEDVDLR             | 52  | 31981562                                                                                                                                                                           | N-Term(iTRAQ4plex)                                                                                   | 1730.88738 | 92 | 87  |      | 5.60 | Expt2 |
| EAFQEAALAAAGDK             | 5   | 6755911                                                                                                                                                                            | N-Term(iTRAQ4plex), K13(iTRAQ4plex)                                                                  | 1608.85076 | 92 | 77  | 1.03 | 5.87 | Expt2 |
| DICNDVLSLEK                | 34  | 149269348;6756041                                                                                                                                                                  | N-Term(iTRAQ4plex), C3(Methylthio), K12(iTRAQ4plex)                                                  | 1695.88994 | 92 | 100 |      | 5.48 | Expt2 |
| DYAAPVNMFLGYSFSQK          | 3   | 110625833                                                                                                                                                                          | N-Term(iTRAQ4plex), K18(iTRAQ4plex)                                                                  | 2327.16318 | 92 | 62  |      | 4.97 | Expt2 |
| NLSSPNPEGINIYOPAPPTGPTTR   | 32  | 124487435                                                                                                                                                                          | N-Term(iTRAQ4plex)                                                                                   | 2677.41153 | 92 | 64  |      | 7.53 | Expt2 |
| GVDEVTIVNLTNR              | 111 | 149260099;6996913                                                                                                                                                                  | N-Term(iTRAQ4plex), N9(Deamidated)                                                                   | 1687.93205 | 92 | 84  | 0.99 | 6.35 | Expt2 |
| DVVIVQDLMETDLYK            | 13  | 21489933;6754632                                                                                                                                                                   | N-Term(iTRAQ4plex), K15(iTRAQ4plex)                                                                  | 2133.10508 | 91 | 75  | 1.17 | 5.07 | Expt2 |
| ALEESNYELEGG               | 4   | 112983636                                                                                                                                                                          | N-Term(iTRAQ4plex), K12(iTRAQ4plex)                                                                  | 1669.85234 | 91 | 93  |      | 5.32 | Expt2 |
| GOQYDTSFAOVNPLR            | 6   | 21536248                                                                                                                                                                           | N-Term(iTRAQ4plex)                                                                                   | 1867.94182 | 91 | 90  |      | 5.50 | Expt2 |
| LGEIVTTIPTIGFNWETVEYK      | 3   | 6680722;6680718;6680716;6671571;6680720                                                                                                                                            | N-Term(iTRAQ4plex), K21(iTRAQ4plex)                                                                  | 2611.44944 | 91 | 76  |      | 6.91 | Expt2 |
| EVSSNAEMIQTSK              | 3   | 6754480                                                                                                                                                                            | N-Term(iTRAQ4plex), K13(iTRAQ4plex)                                                                  | 1711.87847 | 91 | 107 |      | 5.70 | Expt2 |
| AAAPAPEEMDECEQALAAEPK      | 9   | 82795783;51704904;110625979                                                                                                                                                        | N-Term(iTRAQ4plex), C13(Methylthio), K22(iTRAQ4plex)                                                 | 2634.20084 | 91 | 66  |      | 6.48 | Expt2 |
| CELLYEGPPDDEAAMGK          | 11  | 33859482                                                                                                                                                                           | N-Term(iTRAQ4plex), C1(Methylthio), K18(iTRAQ4plex)                                                  | 2285.07402 | 91 | 113 |      | 5.93 | Expt2 |
| TGAIVDPVVGSELLGR           | 40  | 6680748                                                                                                                                                                            | N-Term(iTRAQ4plex)                                                                                   | 1768.99895 | 91 | 100 | 1.16 | 5.40 | Expt2 |
| IEPGVDPPDDTYNETPYEK        | 8   | 227499103;227499234                                                                                                                                                                | N-Term(iTRAQ4plex), K18(iTRAQ4plex)                                                                  | 2370.12485 | 91 | 60  |      | 5.13 | Expt2 |
| LSFLYLDHNDLESVPPNPELSR     | 42  | 6679166                                                                                                                                                                            | N-Term(iTRAQ4plex)                                                                                   | 2812.47141 | 91 | 60  |      | 6.76 | Expt2 |
| AILVDELPGMTDSYR            | 44  | 33859488;7106439;21746161;12963615                                                                                                                                                 | N-Term(iTRAQ4plex)                                                                                   | 1759.94097 | 91 | 85  | 1.23 | 4.90 | Expt2 |
| YEMGNPNENLVVDSR            | 13  | 169234958;32129201                                                                                                                                                                 | N-Term(iTRAQ4plex)                                                                                   | 1993.98296 | 91 | 115 |      | 5.36 | Expt2 |
| LYTLVLTDPDAPSR             | 24  | 84794552                                                                                                                                                                           | N-Term(iTRAQ4plex)                                                                                   | 1704.93450 | 91 | 88  |      | 4.68 | Expt2 |
| EEFASTCPDDEEIELAYEQVAR     | 22  | 15617203                                                                                                                                                                           | N-Term(iTRAQ4plex), C7(Methylthio)                                                                   | 2734.21067 | 91 | 89  |      | 6.73 | Expt2 |
| YAEYSYFALGNELNSYR          | 50  | 88196773                                                                                                                                                                           | N-Term(iTRAQ4plex)                                                                                   | 2204.04717 | 91 | 98  |      | 6.91 | Expt2 |
| LLEPLVTQVITLWNTNSK         | 3   | 6753294                                                                                                                                                                            | N-Term(iTRAQ4plex), K18(iTRAQ4plex)                                                                  | 2258.33109 | 91 | 70  |      | 7.38 | Expt2 |
| EMEEINFALAAANYQDTIGR       | 12  | 31982755                                                                                                                                                                           | N-Term(iTRAQ4plex)                                                                                   | 2345.08476 | 91 | 103 |      | 6.39 | Expt2 |
| SFYPEEVSSMVLTK             | 37  | 31981690                                                                                                                                                                           | N-Term(iTRAQ4plex), K14(iTRAQ4plex)                                                                  | 1904.99675 | 91 | 89  |      | 6.04 | Expt2 |
| AGLESTLAETECR              | 42  | 6754480                                                                                                                                                                            | N-Term(iTRAQ4plex), C12(Methylthio)                                                                  | 1569.73699 | 91 | 86  |      | 5.55 | Expt2 |
| INWNVNSAAGLLDQFYEK         | 5   | 21703702                                                                                                                                                                           | N-Term(iTRAQ4plex), K18(iTRAQ4plex)                                                                  | 2283.23124 | 91 | 66  |      | 5.63 | Expt2 |
| LVPLDLDGDIIDGGNSEYR        | 21  | 124486895                                                                                                                                                                          | N-Term(iTRAQ4plex)                                                                                   | 2304.22515 | 91 | 99  |      | 6.21 | Expt2 |
| SLEEIYFLSLPIK              | 31  | 82898647;149255335;82902507;94383782;94383784;149259263;149263154;149265803;94401827;94402540;94404463                                                                             | N-Term(iTRAQ4plex), K13(iTRAQ4plex)                                                                  | 1840.07793 | 91 | 85  | 1.82 | 4.73 | Expt2 |

|                               |     |                                                                                                                                                                                                                                                                                                                                                                                                                                                       |                                                     |            |    |     |      |      |       |
|-------------------------------|-----|-------------------------------------------------------------------------------------------------------------------------------------------------------------------------------------------------------------------------------------------------------------------------------------------------------------------------------------------------------------------------------------------------------------------------------------------------------|-----------------------------------------------------|------------|----|-----|------|------|-------|
| LQPQTYDITVLPYK                | 51  | 111074529                                                                                                                                                                                                                                                                                                                                                                                                                                             | N-Term(iTRAQ4plex), K16(iTRAQ4plex)                 | 2199.19902 | 91 | 101 | 1.13 | 6.47 | Expt2 |
| LSLODAVNOGLIDODMATR           | 31  | 82950147;82950149;149264086                                                                                                                                                                                                                                                                                                                                                                                                                           | N-Term(iTRAQ4plex)                                  | 2232.14580 | 91 | 130 |      | 7.06 | Expt2 |
| SIOFVDWCPTGFK                 | 33  | 34740335;6678467;51765047;82930560                                                                                                                                                                                                                                                                                                                                                                                                                    | N-Term(iTRAQ4plex), C8(Methylthio), K13(iTRAQ4plex) | 1861.92681 | 91 | 76  | 1.17 | 4.84 | Expt2 |
| LILPVGSPAGNQMLEQYDK           | 3   | 226530884                                                                                                                                                                                                                                                                                                                                                                                                                                             | N-Term(iTRAQ4plex), K19(iTRAQ4plex)                 | 2331.26859 | 91 | 78  |      | 7.16 | Expt2 |
| AASADSTTEGTPDGFVLSTK          | 11  | 41152517;283945572;283945575;283945579                                                                                                                                                                                                                                                                                                                                                                                                                | N-Term(iTRAQ4plex), K22(iTRAQ4plex)                 | 2445.22344 | 91 | 115 |      | 6.39 | Expt2 |
| DLGTDISOIFISR                 | 32  | 116089273                                                                                                                                                                                                                                                                                                                                                                                                                                             | N-Term(iTRAQ4plex)                                  | 1495.78728 | 91 | 75  |      | 4.95 | Expt2 |
| DFLAGGIAAAVSK                 | 27  | 148747424                                                                                                                                                                                                                                                                                                                                                                                                                                             | N-Term(iTRAQ4plex), K13(iTRAQ4plex)                 | 1507.87407 | 90 | 96  |      | 5.64 | Expt2 |
| DDGVFVQEVMOQNSPAAR            | 31  | 90403607;61743961                                                                                                                                                                                                                                                                                                                                                                                                                                     | N-Term(iTRAQ4plex)                                  | 2006.97763 | 90 | 73  | 1.20 | 6.45 | Expt2 |
| TVTAMDVVYALK                  | 52  | 149263932;94378251                                                                                                                                                                                                                                                                                                                                                                                                                                    | N-Term(iTRAQ4plex), M5(Oxidation), K12(iTRAQ4plex)  | 1614.90447 | 90 | 95  |      | 5.09 | Expt2 |
| VPGVDVSSSLGAGSVEVOAPSLOSQDYGK | 5   | 61743961                                                                                                                                                                                                                                                                                                                                                                                                                                              | N-Term(iTRAQ4plex), K29(iTRAQ4plex)                 | 3028.60562 | 90 | 85  |      | 8.72 | Expt2 |
| IVYTSADGTEINEVEVDPIITFFLK     | 9   | 226423922                                                                                                                                                                                                                                                                                                                                                                                                                                             | N-Term(iTRAQ4plex), K25(iTRAQ4plex)                 | 3039.60422 | 90 | 91  |      | 5.88 | Expt2 |
| DFLAGGVAIAISK                 | 47  | 63475897;82880803;22094075                                                                                                                                                                                                                                                                                                                                                                                                                            | N-Term(iTRAQ4plex), K13(iTRAQ4plex)                 | 1507.87822 | 90 | 99  | 1.16 | 5.15 | Expt2 |
| VVDLMAYMASK                   | 19  | 149248895;149249564;149249566;149251040;149251044;149251140;149251223;149251463;149251509;149251903;149251905;149251911;149251964;149251966;149252413;149253819;149253823;149257623;149258744;149258770;149258772;149258934;149258938;149259607;149259652;149259964;149260709;149260711;94387946;149260748;149263021;149265154;149265922;149266302;149266427;149266431;149268472;149268967;149270469;149270673;149272161;94408118;149273204;149275059 | N-Term(iTRAQ4plex), K11(iTRAQ4plex)                 | 1515.82231 | 90 | 79  | 1.34 | 4.25 | Expt2 |
| STAIISFLYSENDLNFIK            | 3   | 33859482                                                                                                                                                                                                                                                                                                                                                                                                                                              | N-Term(iTRAQ4plex), K19(iTRAQ4plex)                 | 2492.32102 | 90 | 70  |      | 6.32 | Expt2 |
| AGAIAPCEVTPVAQNTGLGPEK        | 23  | 94383772;6671569                                                                                                                                                                                                                                                                                                                                                                                                                                      | N-Term(iTRAQ4plex), C7(Methylthio), K22(iTRAQ4plex) | 2457.27079 | 90 | 81  |      | 6.33 | Expt2 |
| VEADVAPQVQGDLDK               | 15  | 149263538;149263685                                                                                                                                                                                                                                                                                                                                                                                                                                   | N-Term(iTRAQ4plex), K15(iTRAQ4plex)                 | 1854.02434 | 90 | 95  | 1.18 | 4.64 | Expt2 |
| IVEAENEYQTAISENYQTMDSDTFK     | 3   | 6671672                                                                                                                                                                                                                                                                                                                                                                                                                                               | N-Term(iTRAQ4plex), K26(iTRAQ4plex)                 | 3271.56003 | 90 | 110 |      | 7.02 | Expt2 |
| ONLEPFMEQOYISNLR              | 72  | 54607171;113195684                                                                                                                                                                                                                                                                                                                                                                                                                                    | N-Term(iTRAQ4plex)                                  | 2026.02134 | 90 | 82  | 1.60 | 7.00 | Expt2 |
| EGIPALDNFLDKL                 | 24  | 33859482                                                                                                                                                                                                                                                                                                                                                                                                                                              | N-Term(iTRAQ4plex), K12(iTRAQ4plex)                 | 1732.97844 | 90 | 55  |      | 5.71 | Expt2 |
| SWCPDCVEAEPVIR                | 17  | 13386060                                                                                                                                                                                                                                                                                                                                                                                                                                              | N-Term(iTRAQ4plex), C3(Methylthio), C6(Methylthio)  | 1839.80657 | 90 | 68  |      | 4.70 | Expt2 |
| VDIDVDPNIEGPDTK               | 13  | 61743961                                                                                                                                                                                                                                                                                                                                                                                                                                              | N-Term(iTRAQ4plex), K16(iTRAQ4plex)                 | 2014.06072 | 90 | 91  |      | 4.58 | Expt2 |
| GEAGAAGPSGAPGPR               | 108 | 111120329                                                                                                                                                                                                                                                                                                                                                                                                                                             | N-Term(iTRAQ4plex)                                  | 1395.71318 | 90 | 95  | 1.22 | 5.80 | Expt2 |
| DSLLODGEFTMDLR                | 70  | 6755040                                                                                                                                                                                                                                                                                                                                                                                                                                               | N-Term(iTRAQ4plex)                                  | 1783.86637 | 90 | 86  | 1.23 | 5.67 | Expt2 |
| GAAGALLVYDITR                 | 13  | 30525051;10946940                                                                                                                                                                                                                                                                                                                                                                                                                                     | N-Term(iTRAQ4plex)                                  | 1463.83501 | 90 | 81  |      | 4.69 | Expt2 |
| QTIENSQAGYOEAFDISK            | 3   | 149263879;149275178;6756039                                                                                                                                                                                                                                                                                                                                                                                                                           | N-Term(iTRAQ4plex), K18(iTRAQ4plex)                 | 2317.15738 | 89 | 52  |      | 6.34 | Expt2 |
| IEDVTPIPSDSTR                 | 35  | 31981100;63680339;149267017                                                                                                                                                                                                                                                                                                                                                                                                                           | N-Term(iTRAQ4plex)                                  | 1573.82158 | 89 | 82  | 1.22 | 4.62 | Expt2 |
| YGISLCOAILDETK                | 9   | 124517663                                                                                                                                                                                                                                                                                                                                                                                                                                             | N-Term(iTRAQ4plex), C6(Methylthio), K14(iTRAQ4plex) | 1887.98088 | 89 | 87  |      | 6.58 | Expt2 |
| NLEPEWAAAEVTK                 | 6   | 149262992;58037267                                                                                                                                                                                                                                                                                                                                                                                                                                    | N-Term(iTRAQ4plex), K14(iTRAQ4plex)                 | 1816.97600 | 89 | 104 |      | 4.11 | Expt2 |
| VIGLSSLDQOVGASAR              | 8   | 225637531                                                                                                                                                                                                                                                                                                                                                                                                                                             | N-Term(iTRAQ4plex)                                  | 1801.99187 | 89 | 126 |      | 5.46 | Expt2 |
| ALAAAGYDVEK                   | 13  | 13430890;9845257;112807207;254588110                                                                                                                                                                                                                                                                                                                                                                                                                  | N-Term(iTRAQ4plex), K11(iTRAQ4plex)                 | 1395.77458 | 89 | 89  | 1.20 | 4.38 | Expt2 |
| IVEVEFIGPK                    | 85  | 111074529                                                                                                                                                                                                                                                                                                                                                                                                                                             | N-Term(iTRAQ4plex), K10(iTRAQ4plex)                 | 1418.85674 | 89 | 85  | 1.46 | 4.68 | Expt2 |
| AFGENAVVOLISLQK               | 17  | 225543183                                                                                                                                                                                                                                                                                                                                                                                                                                             | N-Term(iTRAQ4plex), K15(iTRAQ4plex)                 | 1905.11075 | 89 | 76  |      | 5.24 | Expt2 |
| MFFDAELSQMOTHVSDTSVVLMDNRR    | 36  | 20911031                                                                                                                                                                                                                                                                                                                                                                                                                                              | N-Term(iTRAQ4plex)                                  | 3246.50241 | 89 | 83  |      | 8.51 | Expt2 |
| GSLVPASNANLQAAQDFVR           | 13  | 124249351                                                                                                                                                                                                                                                                                                                                                                                                                                             | N-Term(iTRAQ4plex)                                  | 2102.11431 | 89 | 101 |      | 5.51 | Expt2 |
| NFINNPLAQADWAAK               | 13  | 114326446                                                                                                                                                                                                                                                                                                                                                                                                                                             | N-Term(iTRAQ4plex), K15(iTRAQ4plex)                 | 1961.04839 | 89 | 103 |      | 5.18 | Expt2 |
| AMGAAQVVVTDLSASR              | 3   | 22128627                                                                                                                                                                                                                                                                                                                                                                                                                                              | N-Term(iTRAQ4plex)                                  | 1719.90581 | 89 | 68  |      | 5.25 | Expt2 |
| TOVTELEDELTAEDAK              | 13  | 29336026                                                                                                                                                                                                                                                                                                                                                                                                                                              | N-Term(iTRAQ4plex), K17(iTRAQ4plex)                 | 2151.09702 | 89 | 74  |      | 5.52 | Expt2 |
| APQVSTPTLVEAAR                | 151 | 163310765                                                                                                                                                                                                                                                                                                                                                                                                                                             | N-Term(iTRAQ4plex)                                  | 1583.89018 | 89 | 75  |      | 6.10 | Expt2 |
| SFQNYPPVVSIEDPFDQDDWGAQK      | 3   | 149253386                                                                                                                                                                                                                                                                                                                                                                                                                                             | N-Term(iTRAQ4plex), K25(iTRAQ4plex)                 | 3258.56362 | 89 | 51  |      | 7.22 | Expt2 |
| VDIEAPDVSIIEGPEGK             | 17  | 61743961                                                                                                                                                                                                                                                                                                                                                                                                                                              | N-Term(iTRAQ4plex), K16(iTRAQ4plex)                 | 1943.02092 | 89 | 113 | 1.26 | 5.37 | Expt2 |
| EVDLLEQWIAER                  | 10  | 117938332;117938334                                                                                                                                                                                                                                                                                                                                                                                                                                   | N-Term(iTRAQ4plex)                                  | 1646.81645 | 89 | 75  |      | 4.66 | Expt2 |
| ETSGNLEQLLAVVK                | 24  | 6753060                                                                                                                                                                                                                                                                                                                                                                                                                                               | N-Term(iTRAQ4plex), K15(iTRAQ4plex)                 | 1902.11748 | 89 | 109 |      | 5.79 | Expt2 |
| ELISNASDALDK                  | 8   | 6755863;40556608                                                                                                                                                                                                                                                                                                                                                                                                                                      | N-Term(iTRAQ4plex), K12(iTRAQ4plex)                 | 1563.85283 | 89 | 94  |      | 5.13 | Expt2 |
| TGTAEMSSILEER                 | 19  | 6680748                                                                                                                                                                                                                                                                                                                                                                                                                                               | N-Term(iTRAQ4plex)                                  | 1567.77617 | 89 | 82  |      | 5.04 | Expt2 |

|                                     |     |                                                             |                                                                      |            |    |     |      |      |       |
|-------------------------------------|-----|-------------------------------------------------------------|----------------------------------------------------------------------|------------|----|-----|------|------|-------|
| SELVANNVTLPAGEQR                    | 9   | 121949767;121949779;121949760;121949763;121949765;121949769 | N-Term(iTRAQ4plex)                                                   | 1841.98332 | 88 | 95  |      | 5.47 | Expt2 |
| FTQAGSEVSALLGR                      | 39  | 31980648                                                    | N-Term(iTRAQ4plex)                                                   | 1579.85771 | 88 | 87  |      | 5.81 | Expt2 |
| GGAGGMGIGMGIACSSGGSLCIFSNGDGLLSGSEK | 40  | 149262636;118130981                                         | N-Term(iTRAQ4plex), M6(Oxidation), C22(Methylthio), K37(iTRAQ4plex)  | 3565.66367 | 88 | 108 | 1.04 | 8.19 | Expt2 |
| YDALEVFAGSGTSGOR                    | 36  | 125490382                                                   | N-Term(iTRAQ4plex)                                                   | 1801.89031 | 88 | 101 | 1.20 | 5.88 | Expt2 |
| STLINSFLTDLYPER                     | 11  | 6754816;228480253                                           | N-Term(iTRAQ4plex)                                                   | 2026.10355 | 88 | 84  |      | 5.65 | Expt2 |
| QTEQTYWQATPFR                       | 33  | 6755781;239915968                                           | N-Term(iTRAQ4plex)                                                   | 1799.88445 | 88 | 70  |      | 5.20 | Expt2 |
| MPAAFMGMLK                          | 10  | 13385466                                                    | N-Term(iTRAQ4plex), K10(iTRAQ4plex)                                  | 1384.74333 | 88 | 68  |      | 3.99 | Expt2 |
| VVLAYEPVWAIGTK                      | 27  | 226958349                                                   | N-Term(iTRAQ4plex), K15(iTRAQ4plex)                                  | 1891.09819 | 88 | 97  | 1.23 | 4.88 | Expt2 |
| DITDTSIGAYWTSAPGMVR                 | 40  | 111074529                                                   | N-Term(iTRAQ4plex), M17(Oxidation)                                   | 2201.07207 | 88 | 86  | 1.01 | 6.04 | Expt2 |
| MYDSVLALPGALOATR                    | 23  | 8393144                                                     | N-Term(iTRAQ4plex)                                                   | 1850.00058 | 88 | 78  |      | 5.01 | Expt2 |
| MLTPPMGTVMVLK                       | 25  | 6678321                                                     | N-Term(iTRAQ4plex), K14(iTRAQ4plex)                                  | 1820.99333 | 88 | 76  |      | 5.54 | Expt2 |
| WNSPAEEGLSDCEVFPK                   | 6   | 112293266                                                   | N-Term(iTRAQ4plex), C12(Methylthio), K17(iTRAQ4plex)                 | 2242.04221 | 88 | 72  |      | 5.68 | Expt2 |
| EYGLDLVNLNAGIAFK                    | 8   | 113680352                                                   | N-Term(iTRAQ4plex), K17(iTRAQ4plex)                                  | 2068.13504 | 88 | 65  |      | 4.60 | Expt2 |
| LGGSLADSVLYDEGFLDK                  | 7   | 126521835                                                   | N-Term(iTRAQ4plex), K18(iTRAQ4plex)                                  | 2201.16153 | 88 | 82  | 1.20 | 5.66 | Expt2 |
| ALEEANTELEVK                        | 8   | 7106335;21489935                                            | N-Term(iTRAQ4plex), K12(iTRAQ4plex)                                  | 1633.89580 | 88 | 76  |      | 4.82 | Expt2 |
| LGEYGFQNAILVR                       | 163 | 163310765                                                   | N-Term(iTRAQ4plex), N8(Deamidated)                                   | 1624.88481 | 88 | 72  | 1.19 | 5.61 | Expt2 |
| LNMEAINYMAADGDFK                    | 34  | 6678682                                                     | N-Term(iTRAQ4plex), K16(iTRAQ4plex)                                  | 2091.02056 | 88 | 101 | 1.19 | 5.48 | Expt2 |
| LILLANGPQGLVQIMR                    | 52  | 28395018                                                    | N-Term(iTRAQ4plex), N6(Deamidated), M16(Oxidation)                   | 1954.13010 | 88 | 94  |      | 6.54 | Expt2 |
| AGAGSATLSMAYAGAR                    | 13  | 31982186                                                    | N-Term(iTRAQ4plex)                                                   | 1598.80962 | 88 | 107 |      | 5.83 | Expt2 |
| LOAALDNEAGGRPAMEPNGSLDLGGDAAGR      | 10  | 160333923                                                   | N-Term(iTRAQ4plex), N19(Deamidated)                                  | 3125.50156 | 88 | 46  |      | 5.84 | Expt2 |
| ADYAQLLEDMONAFR                     | 7   | 31560731                                                    | N-Term(iTRAQ4plex)                                                   | 1928.93047 | 88 | 91  |      | 4.81 | Expt2 |
| LDFTGNLIEDIEDGFSK                   | 6   | 6679166                                                     | N-Term(iTRAQ4plex), K18(iTRAQ4plex)                                  | 2302.17496 | 88 | 67  |      | 5.88 | Expt2 |
| GSYGLDGGPIITQVTIPK                  | 9   | 13384620                                                    | N-Term(iTRAQ4plex), K19(iTRAQ4plex)                                  | 2205.24053 | 88 | 95  | 0.99 | 4.63 | Expt2 |
| ADSLTDDINFLR                        | 84  | 54607171                                                    | N-Term(iTRAQ4plex)                                                   | 1523.78135 | 88 | 90  | 1.16 | 5.55 | Expt2 |
| AEGSDVANVLGDGACIMLSGETAK            | 5   | 31981562                                                    | N-Term(iTRAQ4plex), C16(Methylthio), M18(Oxidation), K25(iTRAQ4plex) | 2787.31729 | 88 | 90  |      | 6.36 | Expt2 |
| SMSDVSIEDVQNLR                      | 3   | 157311641                                                   | N-Term(iTRAQ4plex)                                                   | 1694.81633 | 87 | 88  |      | 5.23 | Expt2 |
| ADSLADEINFLR                        | 72  | 113195684                                                   | N-Term(iTRAQ4plex)                                                   | 1507.79167 | 87 | 82  |      | 5.41 | Expt2 |
| ILLAELEQLK                          | 35  | 31982755                                                    | N-Term(iTRAQ4plex), K10(iTRAQ4plex)                                  | 1457.92375 | 87 | 76  |      | 4.84 | Expt2 |
| IIIEIDDDVEK                         | 9   | 160333881                                                   | N-Term(iTRAQ4plex), K10(iTRAQ4plex)                                  | 1490.81487 | 87 | 72  |      | 4.01 | Expt2 |
| NYTDDAIETDDLTIK                     | 9   | 7106389                                                     | N-Term(iTRAQ4plex), K15(iTRAQ4plex)                                  | 2015.00359 | 87 | 94  |      | 6.30 | Expt2 |
| LAQAELEQEOESR                       | 15  | 29336026                                                    | N-Term(iTRAQ4plex)                                                   | 1674.84282 | 87 | 79  |      | 5.35 | Expt2 |
| TGEAIVDAALSALR                      | 14  | 149262992;58037267                                          | N-Term(iTRAQ4plex)                                                   | 1530.86528 | 87 | 81  |      | 5.14 | Expt2 |
| AVTEOGAELSNR                        | 13  | 149263879;6756039                                           | N-Term(iTRAQ4plex)                                                   | 1676.82268 | 87 | 89  |      | 5.68 | Expt2 |
| SSGTGASVGPQPQDQTLVQR                | 14  | 170650623                                                   | N-Term(iTRAQ4plex)                                                   | 2328.15891 | 87 | 87  |      | 5.99 | Expt2 |
| LSOLEELEEEQNNSSELLK                 | 13  | 29336026                                                    | N-Term(iTRAQ4plex), K19(iTRAQ4plex)                                  | 2562.30960 | 87 | 87  |      | 6.29 | Expt2 |
| AFGPGLOGGNAGSPAR                    | 3   | 125347376                                                   | N-Term(iTRAQ4plex)                                                   | 1600.83525 | 87 | 87  |      | 5.68 | Expt2 |
| VLGANFEEVAFDEK                      | 17  | 42415475                                                    | N-Term(iTRAQ4plex), K15(iTRAQ4plex)                                  | 1955.04436 | 87 | 115 | 0.99 | 6.20 | Expt2 |
| TGOATVASGIPAGWMLDCGTESSK            | 4   | 70778976                                                    | N-Term(iTRAQ4plex), C19(Methylthio), K25(iTRAQ4plex)                 | 2758.31284 | 87 | 87  |      | 6.81 | Expt2 |
| NQLLOEELGALQLR                      | 33  | 112421039                                                   | N-Term(iTRAQ4plex)                                                   | 1769.00736 | 87 | 75  |      | 5.58 | Expt2 |
| STPDPEESQOELDLAQETEVOAENIK          | 3   | 110431378                                                   | N-Term(iTRAQ4plex), K27(iTRAQ4plex)                                  | 3286.60654 | 87 | 84  |      | 6.31 | Expt2 |
| FMODPMEIFVDDETK                     | 5   | 9790069                                                     | N-Term(iTRAQ4plex), K15(iTRAQ4plex)                                  | 2133.01518 | 87 | 84  |      | 4.77 | Expt2 |
| LTELEELQK                           | 68  | 20911031                                                    | N-Term(iTRAQ4plex), K10(iTRAQ4plex)                                  | 1461.84734 | 87 | 64  |      | 5.26 | Expt2 |
| VSVISVEEPPQR                        | 9   | 149257125;149257127;38142460                                | N-Term(iTRAQ4plex)                                                   | 1483.82390 | 87 | 77  |      | 4.53 | Expt2 |
| TLFSNIVLGGSTLFLK                    | 9   | 8392847;22122615                                            | N-Term(iTRAQ4plex), K16(iTRAQ4plex)                                  | 1972.13980 | 87 | 72  |      | 4.67 | Expt2 |
| EAINVEQAFQTIAR                      | 36  | 148747526                                                   | N-Term(iTRAQ4plex)                                                   | 1733.93401 | 87 | 91  | 1.42 | 6.29 | Expt2 |
| ELPPDQAEYCIAR                       | 94  | 61097906;11230802                                           | N-Term(iTRAQ4plex), C10(Methylthio)                                  | 1694.80120 | 87 | 85  |      | 4.44 | Expt2 |
| MFVLDEADEMLSR                       | 22  | 176865892;21450625;176866061;149270417;226823309;176865998  | N-Term(iTRAQ4plex)                                                   | 1699.81865 | 87 | 75  |      | 4.22 | Expt2 |
| GTDVNVFTTILTSR                      | 48  | 124517663                                                   | N-Term(iTRAQ4plex)                                                   | 1667.91460 | 87 | 90  | 0.99 | 5.27 | Expt2 |
| SLGYAYVNFQADPAER                    | 23  | 22507391;34419622;31560656                                  | N-Term(iTRAQ4plex)                                                   | 2073.01836 | 87 | 108 | 1.23 | 5.32 | Expt2 |
| GGGGNF6P6P6SFR                      | 13  | 149274531;32880197;109134362                                | N-Term(iTRAQ4plex)                                                   | 1521.73345 | 87 | 101 |      | 5.20 | Expt2 |
| EAAQMDMVDNGVEDLR                    | 12  | 10092608                                                    | N-Term(iTRAQ4plex), M5(Oxidation)                                    | 1952.87932 | 87 | 79  |      | 4.22 | Expt2 |
| YSDMIVAAIOAEK                       | 16  | 31560697                                                    | N-Term(iTRAQ4plex), K13(iTRAQ4plex)                                  | 1726.93389 | 87 | 96  |      | 4.61 | Expt2 |
| MLTYDPMLLFTGR                       | 28  | 31560625                                                    | N-Term(iTRAQ4plex)                                                   | 1701.88713 | 87 | 79  |      | 4.43 | Expt2 |

|                             |    |                                                          |                                                                     |            |    |     |      |      |       |
|-----------------------------|----|----------------------------------------------------------|---------------------------------------------------------------------|------------|----|-----|------|------|-------|
| NINADEAAAMGAVVQAAALSK       | 3  | 157951706                                                | N-Term(iTRAQ4plex), K21(iTRAQ4plex)                                 | 2367.22922 | 87 | 84  |      | 7.31 | Expt2 |
| GTVLSIDDSLQR                | 11 | 169234958:32129201                                       | N-Term(iTRAQ4plex)                                                  | 1447.78667 | 87 | 90  |      | 4.13 | Expt2 |
| VSLPDVDLDLK                 | 6  | 61743961                                                 | N-Term(iTRAQ4plex), K11(iTRAQ4plex)                                 | 1501.87602 | 87 | 104 |      | 4.36 | Expt2 |
| VQCSDLGLDK                  | 31 | 6681143                                                  | N-Term(iTRAQ4plex), C4(Methylthio), K11(iTRAQ4plex)                 | 1510.78953 | 87 | 89  |      | 4.93 | Expt2 |
| TAANEVFTLK                  | 20 | 54607171                                                 | N-Term(iTRAQ4plex), K11(iTRAQ4plex)                                 | 1510.83953 | 87 | 90  |      | 5.36 | Expt2 |
| QILVGDIGDTEVDPYTSFVK        | 4  | 6671746                                                  | N-Term(iTRAQ4plex), K20(iTRAQ4plex)                                 | 2484.31858 | 86 | 63  |      | 5.78 | Expt2 |
| FTASAGIQVVGDDTLVTNPK        | 24 | 149253386                                                | N-Term(iTRAQ4plex), K20(iTRAQ4plex)                                 | 2321.26737 | 86 | 79  | 0.99 | 5.80 | Expt2 |
| TILSNQTVIPENVEITLK          | 14 | 51767763:149264373:149270496:149270498                   | N-Term(iTRAQ4plex), K19(iTRAQ4plex)                                 | 2415.36455 | 86 | 94  |      | 6.46 | Expt2 |
| FLLDHQGLFPSTDAQGV           | 18 | 225543424:225543420                                      | N-Term(iTRAQ4plex)                                                  | 2118.06681 | 86 | 60  |      | 4.95 | Expt2 |
| YQVDPDACFSAK                | 21 | 6755963                                                  | N-Term(iTRAQ4plex), C8(Methylthio), K12(iTRAQ4plex)                 | 1677.79302 | 86 | 90  |      | 4.46 | Expt2 |
| TQTAIASEMPTNLTEAEK          | 7  | 117938332:117938334                                      | N-Term(iTRAQ4plex), K19(iTRAQ4plex)                                 | 2338.16983 | 86 | 77  |      | 5.69 | Expt2 |
| FYPEDVAEELIQDITQK           | 10 | 149266483                                                | N-Term(iTRAQ4plex), K17(iTRAQ4plex)                                 | 2326.20830 | 86 | 98  |      | 5.65 | Expt2 |
| QLEESVDSLGEELVOLR           | 9  | 61657921                                                 | N-Term(iTRAQ4plex)                                                  | 2088.10306 | 86 | 103 |      | 5.88 | Expt2 |
| YADLTEDQLPSCESLK            | 16 | 114326546                                                | N-Term(iTRAQ4plex), C12(Methylthio), K16(iTRAQ4plex)                | 2146.02934 | 86 | 96  |      | 5.12 | Expt2 |
| DNVYPEVSALDOEIIIEVDPDK      | 8  | 149261626:149261791:6677801                              | N-Term(iTRAQ4plex), K22(iTRAQ4plex)                                 | 2777.40909 | 86 | 58  |      | 5.22 | Expt2 |
| EFFFALVQTLPGTCEDLK          | 14 | 148277039                                                | N-Term(iTRAQ4plex), C15(Methylthio), K19(iTRAQ4plex)                | 2441.27396 | 86 | 68  |      | 5.40 | Expt2 |
| QSEASLAETEGR                | 33 | 112983636                                                | N-Term(iTRAQ4plex)                                                  | 1534.78398 | 86 | 84  |      | 5.12 | Expt2 |
| EILVGDVGATIDPFK             | 46 | 9790219                                                  | N-Term(iTRAQ4plex), K16(iTRAQ4plex)                                 | 1963.09880 | 86 | 99  | 0.99 | 5.93 | Expt2 |
| VIDPATATSVDLR               | 15 | 6753322                                                  | N-Term(iTRAQ4plex)                                                  | 1501.83391 | 86 | 91  |      | 4.57 | Expt2 |
| DMTSEELDDILR                | 12 | 21450277                                                 | N-Term(iTRAQ4plex)                                                  | 1580.76445 | 86 | 94  |      | 4.63 | Expt2 |
| YIAIVSTTVEIK                | 9  | 116089273                                                | N-Term(iTRAQ4plex), K12(iTRAQ4plex)                                 | 1612.94975 | 86 | 92  |      | 4.01 | Expt2 |
| WELLOQVNTSTR                | 57 | 51092233                                                 | N-Term(iTRAQ4plex), N8(Deamidated)                                  | 1619.85503 | 86 | 80  | 1.44 | 4.81 | Expt2 |
| FTDEEVDLYR                  | 45 | 21728376:71037403                                        | N-Term(iTRAQ4plex)                                                  | 1559.74016 | 86 | 70  |      | 4.86 | Expt2 |
| FLTNGSSPPGQER               | 6  | 29336026                                                 | N-Term(iTRAQ4plex), N4(Deamidated)                                  | 1621.79460 | 86 | 67  |      | 4.15 | Expt2 |
| FQELIFEDFAR                 | 15 | 22122641                                                 | N-Term(iTRAQ4plex)                                                  | 1558.80779 | 86 | 61  |      | 3.87 | Expt2 |
| ALMGSPQLVAVVVR              | 25 | 28395018                                                 | N-Term(iTRAQ4plex)                                                  | 1555.91728 | 86 | 83  | 1.35 | 4.78 | Expt2 |
| LTEMETMOSQLMAEK             | 17 | 114326446                                                | N-Term(iTRAQ4plex), K15(iTRAQ4plex)                                 | 2058.02396 | 86 | 73  | 1.41 | 5.75 | Expt2 |
| VELVPPTPAEIPTAQSVK          | 14 | 149253631:149262331                                      | N-Term(iTRAQ4plex), K19(iTRAQ4plex)                                 | 2277.33304 | 86 | 58  |      | 5.08 | Expt2 |
| GPVLNNTSDVAGIAAICDAR        | 4  | 163965368                                                | N-Term(iTRAQ4plex), C18(Methylthio)                                 | 2333.13425 | 86 | 95  |      | 6.44 | Expt2 |
| IIDVVYNASNNELVR             | 40 | 149257598:149250154:82922494:28491531:94387984:149264053 | N-Term(iTRAQ4plex)                                                  | 1863.01006 | 86 | 91  | 1.16 | 4.43 | Expt2 |
| SOEQLAELAETAK               | 10 | 149266483                                                | N-Term(iTRAQ4plex), K15(iTRAQ4plex)                                 | 1940.02915 | 86 | 59  |      | 6.63 | Expt2 |
| EIDPGTQLYTVTSSLEYK          | 9  | 31791059                                                 | N-Term(iTRAQ4plex), K18(iTRAQ4plex)                                 | 2332.22733 | 86 | 83  |      | 6.90 | Expt2 |
| DVIDADAAYYFER               | 48 | 31560359                                                 | N-Term(iTRAQ4plex)                                                  | 1691.80657 | 86 | 74  | 1.14 | 4.94 | Expt2 |
| LTVEDPVTVEYITR              | 36 | 7106389:254692831                                        | N-Term(iTRAQ4plex)                                                  | 1778.97148 | 86 | 86  |      | 4.88 | Expt2 |
| GFSVWADTPELQR               | 33 | 6754508                                                  | N-Term(iTRAQ4plex)                                                  | 1562.82878 | 86 | 69  |      | 4.74 | Expt2 |
| TPPSYVAFTDTER               | 57 | 124339838:50345978:124339829:124339826:31981690          | N-Term(iTRAQ4plex)                                                  | 1631.80766 | 85 | 79  |      | 5.44 | Expt2 |
| TOGPYDVVWLPGLNGLAQNLSSESPMK | 9  | 55741460                                                 | N-Term(iTRAQ4plex), M25(Oxidation), K27(iTRAQ4plex)                 | 3074.60373 | 85 | 61  |      | 6.10 | Expt2 |
| TEEDYPPFHEEY                | 3  | 160415215                                                | N-Term(iTRAQ4plex)                                                  | 1602.67278 | 85 | 29  |      |      | Expt2 |
| IDMYADGTODLMMMIAPFK         | 6  | 160298217                                                | N-Term(iTRAQ4plex), M12(Oxidation), M13(Oxidation), K21(iTRAQ4plex) | 2681.30362 | 85 | 53  |      | 5.47 | Expt2 |
| QGVVADINGLR                 | 24 | 226823220                                                | N-Term(iTRAQ4plex), N8(Deamidated)                                  | 1316.69243 | 85 | 67  |      | 4.11 | Expt2 |
| SQDVGFWGEVEVVR              | 5  | 158518433:165905585                                      | N-Term(iTRAQ4plex)                                                  | 1651.81804 | 85 | 55  |      | 4.86 | Expt2 |
| ITNLTLQLEQASIVK             | 16 | 82950147:149264086                                       | N-Term(iTRAQ4plex), K15(iTRAQ4plex)                                 | 1974.15434 | 85 | 96  |      | 5.83 | Expt2 |
| FLFVQTVQOASK                | 3  | 31980632                                                 | N-Term(iTRAQ4plex), K12(iTRAQ4plex)                                 | 1649.98552 | 85 | 93  |      | 4.78 | Expt2 |
| LPAAGVDMVMATVK              | 18 | 12584986:149255181:149255570:149269218:149272300         | N-Term(iTRAQ4plex), K15(iTRAQ4plex)                                 | 1747.97563 | 85 | 121 |      | 5.42 | Expt2 |
| SDFNGLNNLVLIELGNPLK         | 5  | 6681143                                                  | N-Term(iTRAQ4plex), N4(Deamidated), K20(iTRAQ4plex)                 | 2402.32109 | 85 | 104 |      | 6.36 | Expt2 |
| VGDAPISVEVEFEGPK            | 44 | 6755114                                                  | N-Term(iTRAQ4plex), K17(iTRAQ4plex)                                 | 2018.07456 | 85 | 80  |      | 5.14 | Expt2 |
| FVGEQDVMVFASFIR             | 6  | 31981562                                                 | N-Term(iTRAQ4plex), M9(Oxidation)                                   | 2019.99736 | 85 | 65  |      | 5.81 | Expt2 |
| GPQISAPSMDFNLGPK            | 9  | 61743961                                                 | N-Term(iTRAQ4plex), K17(iTRAQ4plex)                                 | 2076.06670 | 85 | 88  |      | 5.82 | Expt2 |
| SAMPFTASPAPSTR              | 10 | 158635992                                                | N-Term(iTRAQ4plex)                                                  | 1564.79253 | 85 | 66  |      | 4.38 | Expt2 |
| EVLQALEELAVNDQK             | 3  | 45433560:40254635:61657921                               | N-Term(iTRAQ4plex), K16(iTRAQ4plex)                                 | 2150.16172 | 85 | 66  |      | 6.55 | Expt2 |
| GLIDEANQDFTNR               | 6  | 33563252:16755029                                        | N-Term(iTRAQ4plex)                                                  | 1636.80449 | 85 | 77  |      | 4.95 | Expt2 |
| EVVQELQFQEDPQTK             | 22 | 112421039                                                | N-Term(iTRAQ4plex), K16(iTRAQ4plex)                                 | 2219.18698 | 85 | 70  | 0.98 | 6.07 | Expt2 |
| GOVGGDVNEMDAAPGVDLRSR       | 14 | 154090941:21489935                                       | N-Term(iTRAQ4plex), M11(Oxidation)                                  | 2246.08721 | 85 | 122 | 1.22 | 4.78 | Expt2 |



|                          |     |                                       |                                                      |            |    |     |      |      |       |
|--------------------------|-----|---------------------------------------|------------------------------------------------------|------------|----|-----|------|------|-------|
| LLEAQIATGGIIDPK          | 15  | 82950147;82950149;149264086           | N-Term(iTRAQ4plex), K15(iTRAQ4plex)                  | 1827.09061 | 85 | 64  |      | 5.29 | Expt2 |
| ILDVNDNPPHFSQTIK         | 8   | 110625833                             | N-Term(iTRAQ4plex), K17(iTRAQ4plex)                  | 2249.24741 | 84 | 84  |      | 5.69 | Expt2 |
| VVDLDAQDADIVCR           | 5   | 31560737                              | N-Term(iTRAQ4plex), C13(Methylthio)                  | 1719.89397 | 84 | 82  |      | 4.68 | Expt2 |
| FASEIAGVDDLTGTGR         | 8   | 229892318                             | N-Term(iTRAQ4plex)                                   | 1752.89385 | 84 | 100 |      | 5.25 | Expt2 |
| ALIAGGGAPEIELALR         | 25  | 6753322                               | N-Term(iTRAQ4plex)                                   | 1694.99455 | 84 | 93  |      | 4.95 | Expt2 |
| NLDSLEEDLDFLR            | 3   | 124248572                             | N-Term(iTRAQ4plex)                                   | 1722.87248 | 84 | 87  |      | 4.31 | Expt2 |
| TVGIDDLTGEPLIOR          | 14  | 23956104                              | N-Term(iTRAQ4plex)                                   | 1770.97698 | 84 | 85  | 0.99 | 5.04 | Expt2 |
| LLPOVMYLDGYDR            | 26  | 40254600                              | N-Term(iTRAQ4plex)                                   | 1726.90117 | 84 | 78  |      | 3.88 | Expt2 |
| GDWSQFTLWQGR             | 3   | 125628659                             | N-Term(iTRAQ4plex)                                   | 1752.86162 | 84 | 77  |      | 4.53 | Expt2 |
| ELGSPPGISLETIDAAFSCPGSSR | 8   | 160358829                             | N-Term(iTRAQ4plex), C19(Methylthio)                  | 2581.24656 | 84 | 74  |      | 6.71 | Expt2 |
| INPVEFNPEFVAR            | 3   | 82896077                              | N-Term(iTRAQ4plex)                                   | 1675.89348 | 84 | 69  |      | 4.16 | Expt2 |
| TESSTVVTPLPGEVR          | 3   | 110347564;110815853                   | N-Term(iTRAQ4plex)                                   | 1715.93193 | 84 | 65  |      | 4.53 | Expt2 |
| GGVPETTELLK              | 77  | 163310769                             | N-Term(iTRAQ4plex), K11(iTRAQ4plex)                  | 1431.83074 | 84 | 66  | 0.98 | 4.34 | Expt2 |
| DIDITSPEFMK              | 14  | 61743961                              | N-Term(iTRAQ4plex), K12(iTRAQ4plex)                  | 1696.91167 | 84 | 89  |      | 4.34 | Expt2 |
| GDELADSALEIFK            | 27  | 6678321                               | N-Term(iTRAQ4plex), K13(iTRAQ4plex)                  | 1695.90703 | 84 | 118 |      | 5.77 | Expt2 |
| ALTVPELTQVQVDAK          | 71  | 7106439                               | N-Term(iTRAQ4plex), K15(iTRAQ4plex)                  | 1948.10454 | 84 | 110 |      | 5.67 | Expt2 |
| GPILPPESFVLYR            | 37  | 125490382                             | N-Term(iTRAQ4plex)                                   | 1731.00089 | 84 | 64  |      | 4.85 | Expt2 |
| ELSTTLNADAVTR            | 5   | 112293266                             | N-Term(iTRAQ4plex)                                   | 1663.86797 | 84 | 90  |      | 5.30 | Expt2 |
| YEISSVPTFLFFK            | 6   | 31981269                              | N-Term(iTRAQ4plex), K13(iTRAQ4plex)                  | 1866.03557 | 84 | 68  |      | 4.71 | Expt2 |
| TTAENEVMLK               | 61  | 20911031                              | N-Term(iTRAQ4plex), M9(Oxidation), K11(iTRAQ4plex)   | 1586.83953 | 84 | 70  |      | 4.56 | Expt2 |
| NVFDEAILAALPEPEPK        | 17  | 6753364                               | N-Term(iTRAQ4plex), K17(iTRAQ4plex)                  | 2141.17632 | 84 | 81  | 1.18 | 5.94 | Expt2 |
| MLTAQDVSYDEAR            | 6   | 55926127                              | N-Term(iTRAQ4plex)                                   | 1642.78874 | 84 | 80  |      | 4.44 | Expt2 |
| OGIPFVGQVLLDGR           | 142 | 148277039                             | N-Term(iTRAQ4plex)                                   | 1742.01335 | 84 | 89  |      | 6.62 | Expt2 |
| VLEQLTGGTPVFSK           | 22  | 13385408;149251925;38082564;149269674 | N-Term(iTRAQ4plex), K14(iTRAQ4plex)                  | 1835.05937 | 84 | 89  |      | 5.99 | Expt2 |
| YTTDPETEQLOR             | 17  | 112421039                             | N-Term(iTRAQ4plex)                                   | 1753.83879 | 84 | 75  |      | 4.63 | Expt2 |
| GAVSAEQVIAGFNR           | 10  | 31981577                              | N-Term(iTRAQ4plex)                                   | 1562.84136 | 84 | 74  |      | 5.86 | Expt2 |
| HGAVDQIQLTQAQLEER        | 10  | 6679567                               | N-Term(iTRAQ4plex)                                   | 2169.20377 | 84 | 81  |      | 5.66 | Expt2 |
| ACGDSTLTQITAGLDPVGR      | 15  | 13937391                              | N-Term(iTRAQ4plex), C2(Methylthio)                   | 2065.01811 | 84 | 93  |      | 5.29 | Expt2 |
| FFPLEAWQIGK              | 9   | 6753618                               | N-Term(iTRAQ4plex), K11(iTRAQ4plex)                  | 1623.91594 | 84 | 87  |      | 4.69 | Expt2 |
| FLIPNASOPESK             | 36  | 149269348;6756041                     | N-Term(iTRAQ4plex), K12(iTRAQ4plex)                  | 1618.90874 | 84 | 75  | 1.03 | 4.28 | Expt2 |
| VDDIDVDDLIEGPEGK         | 13  | 61743961                              | N-Term(iTRAQ4plex), K16(iTRAQ4plex)                  | 1999.04766 | 84 | 84  |      | 4.89 | Expt2 |
| IAQSDYIPTQQDVLRL         | 18  | 149260278;41054806                    | N-Term(iTRAQ4plex)                                   | 1891.00286 | 84 | 86  |      | 5.03 | Expt2 |
| EEPFPPPEEFVFIHAVPVEER    | 12  | 149270322;124487099                   | N-Term(iTRAQ4plex)                                   | 2785.40494 | 84 | 60  |      | 7.18 | Expt2 |
| VDFPQDQLATLTGR           | 20  | 31982186                              | N-Term(iTRAQ4plex)                                   | 1704.90508 | 84 | 81  |      | 4.50 | Expt2 |
| ISLPLTFSSLNLR            | 34  | 31982755                              | N-Term(iTRAQ4plex)                                   | 1702.00896 | 83 | 61  | 1.23 | 5.17 | Expt2 |
| EVDIGIPDATGR             | 30  | 225543319;94408011                    | N-Term(iTRAQ4plex)                                   | 1386.73711 | 83 | 68  | 0.99 | 3.89 | Expt2 |
| ALMGSPOLVAAVVR           | 41  | 28395018                              | N-Term(iTRAQ4plex), M3(Oxidation)                    | 1571.91094 | 83 | 77  | 1.22 | 4.89 | Expt2 |
| NNVILQLOPDPYK            | 138 | 111074529                             | N-Term(iTRAQ4plex), N2(Deamidated), K15(iTRAQ4plex)  | 2029.12424 | 83 | 69  | 1.14 | 5.63 | Expt2 |
| MLSNENFEYLR              | 10  | 149260240                             | N-Term(iTRAQ4plex)                                   | 1688.80876 | 83 | 75  |      | 5.62 | Expt2 |
| TPSYEPOETDSLQOMETK       | 20  | 112421039                             | N-Term(iTRAQ4plex), K18(iTRAQ4plex)                  | 2329.11016 | 83 | 88  | 1.35 | 6.77 | Expt2 |
| LVOEVTDFAK               | 41  | 163310765                             | N-Term(iTRAQ4plex), K10(iTRAQ4plex)                  | 1437.82695 | 83 | 76  |      | 4.87 | Expt2 |
| QAAPCVLFDELDLSIAK        | 9   | 225543319                             | N-Term(iTRAQ4plex), C5(Methylthio), K17(iTRAQ4plex)  | 2201.12619 | 83 | 71  | 1.23 | 5.34 | Expt2 |
| TVEVPEDEVVR              | 6   | 31982233                              | N-Term(iTRAQ4plex)                                   | 1415.74993 | 83 | 65  |      | 4.18 | Expt2 |
| CATSTPAFFAEK             | 7   | 124517663                             | N-Term(iTRAQ4plex), C1(Methylthio), K12(iTRAQ4plex)  | 1606.78386 | 83 | 89  |      | 5.03 | Expt2 |
| SLLGEVEQNLQVAK           | 21  | 112421039                             | N-Term(iTRAQ4plex), K14(iTRAQ4plex)                  | 1816.05107 | 83 | 111 |      | 5.28 | Expt2 |
| IVDDLINLQNSVK            | 35  | 111074529                             | N-Term(iTRAQ4plex), C10(Methylthio), K14(iTRAQ4plex) | 1881.00945 | 83 | 104 | 1.36 | 5.20 | Expt2 |
| SVSSPLLSTDAVSFLR         | 18  | 21040233                              | N-Term(iTRAQ4plex)                                   | 1823.00859 | 83 | 88  |      | 3.98 | Expt2 |
| WVIGDENYGESSR            | 14  | 18079339                              | N-Term(iTRAQ4plex)                                   | 1811.86907 | 83 | 85  |      | 4.57 | Expt2 |
| ESEITDEDIDGILER          | 3   | 40254124                              | N-Term(iTRAQ4plex)                                   | 1877.91411 | 83 | 82  |      | 5.01 | Expt2 |
| GDVDSVIPNIEGDLK          | 19  | 61743961                              | N-Term(iTRAQ4plex), K15(iTRAQ4plex)                  | 1859.00737 | 83 | 82  |      | 4.09 | Expt2 |
| FSSETWONLGTOR            | 3   | 171460960                             | N-Term(iTRAQ4plex)                                   | 1810.92302 | 83 | 75  |      | 5.74 | Expt2 |
| LDNLVAIFDINR             | 94  | 6678359                               | N-Term(iTRAQ4plex)                                   | 1546.87554 | 83 | 69  | 1.23 | 5.08 | Expt2 |
| APEDVQGVPEWSLK           | 14  | 61743961                              | N-Term(iTRAQ4plex), K14(iTRAQ4plex)                  | 1842.99187 | 83 | 98  |      | 5.05 | Expt2 |
| NAVTFEGPVPDTR            | 10  | 18079339                              | N-Term(iTRAQ4plex)                                   | 1745.89385 | 83 | 96  |      | 5.35 | Expt2 |
| DNTALLTQVOTMTR           | 3   | 28076935                              | N-Term(iTRAQ4plex)                                   | 1735.91350 | 83 | 58  |      | 4.96 | Expt2 |

|                           |     |                                                                                                                |                                                      |            |    |     |      |      |       |
|---------------------------|-----|----------------------------------------------------------------------------------------------------------------|------------------------------------------------------|------------|----|-----|------|------|-------|
| MLPILLEVAEK               | 16  | 86439989                                                                                                       | N-Term(iTRAQ4plex), K10(iTRAQ4plex)                  | 1430.85991 | 83 | 65  |      | 4.07 | Expt2 |
| ALLOALIQTEMDLK            | 10  | 82950147;82950149;149264086                                                                                    | N-Term(iTRAQ4plex), K14(iTRAQ4plex)                  | 1875.09189 | 83 | 71  | 1.37 | 5.55 | Expt2 |
| LLGPDAAINLADPDGALAK       | 8   | 28076935                                                                                                       | N-Term(iTRAQ4plex), K19(iTRAQ4plex)                  | 2123.19951 | 83 | 89  |      | 5.59 | Expt2 |
| APSTYGGMSVTSR             | 12  | 21489935                                                                                                       | N-Term(iTRAQ4plex)                                   | 1544.75237 | 83 | 99  |      | 5.17 | Expt2 |
| SPAASAPSLPPAAVLPK         | 6   | 34610241;34610235;34610233                                                                                     | N-Term(iTRAQ4plex), K19(iTRAQ4plex)                  | 2020.16764 | 83 | 56  |      | 4.62 | Expt2 |
| TELEDTLDSTAAQOELR         | 25  | 114326446                                                                                                      | N-Term(iTRAQ4plex)                                   | 2064.02593 | 83 | 118 |      | 7.05 | Expt2 |
| MTNGFSGADLTEICOR          | 15  | 225543319;94408011                                                                                             | N-Term(iTRAQ4plex), N3(Deamidated), C14(Methylthio)  | 1933.85759 | 83 | 83  |      | 5.08 | Expt2 |
| GSSYFSMDSAEGR             | 14  | 160333881                                                                                                      | N-Term(iTRAQ4plex)                                   | 1537.67302 | 83 | 79  |      | 4.82 | Expt2 |
| VAAPDVVPTLDTVR            | 12  | 134288917                                                                                                      | N-Term(iTRAQ4plex)                                   | 1695.98027 | 83 | 80  |      | 4.88 | Expt2 |
| ESDTGLAPPALWDLAADK        | 10  | 33859604                                                                                                       | N-Term(iTRAQ4plex), K18(iTRAQ4plex)                  | 2158.13340 | 83 | 71  |      | 4.76 | Expt2 |
| QAOQIEVPSASALIK           | 17  | 149233723;149251813;83028352;94390243;94407735;160333553                                                       | N-Term(iTRAQ4plex), K16(iTRAQ4plex)                  | 1955.18351 | 83 | 64  |      | 4.46 | Expt2 |
| LAEMPADSGYPAYLGR          | 3   | 31560731                                                                                                       | N-Term(iTRAQ4plex), M4(Oxidation)                    | 1941.95171 | 83 | 88  |      |      | Expt2 |
| AVYTVDNDPQOQVVTDTPTNDGILK | 14  | 6753374                                                                                                        | N-Term(iTRAQ4plex), K27(iTRAQ4plex)                  | 3236.69272 | 83 | 99  |      | 7.30 | Expt2 |
| GGAEQFMEETER              | 14  | 238814391                                                                                                      | N-Term(iTRAQ4plex)                                   | 1527.68865 | 82 | 75  |      | 4.53 | Expt2 |
| DEILPTTPISEOK             | 25  | 6755372                                                                                                        | N-Term(iTRAQ4plex), K13(iTRAQ4plex)                  | 1758.97881 | 82 | 83  |      | 5.26 | Expt2 |
| GDGPICLVLAPTR             | 22  | 40068493;93587673;40068491;83816893                                                                            | N-Term(iTRAQ4plex), C6(Methylthio)                   | 1501.80278 | 82 | 85  |      | 5.38 | Expt2 |
| AMGIMNSFVNDIFER           | 158 | 68131547;68226433;30061385;149264032;160420312;46049029;28316760;68226431;160420308;30089704;30061387;13386452 | N-Term(iTRAQ4plex), M2(Oxidation), M5(Oxidation)     | 1919.91582 | 82 | 80  |      | 5.76 | Expt2 |
| YDSVSFVNGAVSDSK           | 7   | 125490382                                                                                                      | N-Term(iTRAQ4plex), N8(Deamidated), K16(iTRAQ4plex)  | 1978.94560 | 82 | 106 |      | 4.99 | Expt2 |
| ALTVPELQOQMDAK            | 48  | 31981939;22165384;149253488;149253527;83030206;27754056;12963615                                               | N-Term(iTRAQ4plex), K15(iTRAQ4plex)                  | 1980.07622 | 82 | 105 | 1.56 | 5.57 | Expt2 |
| SVSTPSEAGSQSDGDAVGR       | 7   | 6753658                                                                                                        | N-Term(iTRAQ4plex)                                   | 2094.96660 | 82 | 102 |      | 6.10 | Expt2 |
| LATQLTGPVMPPIR            | 29  | 149251177;149252074;149258092                                                                                  | N-Term(iTRAQ4plex)                                   | 1540.90483 | 82 | 66  |      | 5.45 | Expt2 |
| VAGTGGGLEELVEELNSGK       | 11  | 7304993;226423871;226423873                                                                                    | N-Term(iTRAQ4plex), K20(iTRAQ4plex)                  | 2276.19779 | 82 | 75  |      | 5.72 | Expt2 |
| LFYAPTSGGPEELVPIPGNTNYAIR | 16  | 111074529                                                                                                      | N-Term(iTRAQ4plex)                                   | 2933.55631 | 82 | 60  |      | 6.31 | Expt2 |
| ELAQQVQQAAYEYCR           | 16  | 83816893                                                                                                       | N-Term(iTRAQ4plex), C14(Methylthio)                  | 1925.93498 | 82 | 94  | 1.20 | 5.28 | Expt2 |
| OALODLLSEYMGNAGR          | 13  | 6753294                                                                                                        | N-Term(iTRAQ4plex)                                   | 1909.95049 | 82 | 92  |      | 5.06 | Expt2 |
| MTDQEAIQDLWQWR            | 10  | 149251776;94385641;6679108                                                                                     | N-Term(iTRAQ4plex)                                   | 1963.94719 | 82 | 85  |      | 5.30 | Expt2 |
| AIEOADLLQEEDESPR          | 7   | 6671559                                                                                                        | N-Term(iTRAQ4plex)                                   | 1986.97185 | 82 | 78  |      | 5.40 | Expt2 |
| LAPGTDPIQNFVAVDNGPGLDR    | 9   | 115647999                                                                                                      | N-Term(iTRAQ4plex)                                   | 2458.25699 | 82 | 67  |      | 6.47 | Expt2 |
| IDAENLSSAPLDOALR          | 3   | 165972311                                                                                                      | N-Term(iTRAQ4plex)                                   | 1985.04289 | 82 | 106 |      | 5.76 | Expt2 |
| TOMLDQEELLASTR            | 5   | 61657921                                                                                                       | N-Term(iTRAQ4plex)                                   | 1778.90801 | 82 | 77  |      | 5.27 | Expt2 |
| GFAFVTFESPADAK            | 5   | 6755296;83699420                                                                                               | N-Term(iTRAQ4plex), K14(iTRAQ4plex)                  | 1774.92789 | 82 | 61  |      | 4.82 | Expt2 |
| DISEASVFDAYVLPK           | 31  | 149259343;83030252;83030529;94392702                                                                           | N-Term(iTRAQ4plex), K15(iTRAQ4plex)                  | 1942.04399 | 82 | 116 | 1.09 | 5.84 | Expt2 |
| AGNLGGGVVTIER             | 21  | 149256880                                                                                                      | N-Term(iTRAQ4plex)                                   | 1386.78252 | 82 | 77  |      | 5.24 | Expt2 |
| GISOEQMQEFR               | 45  | 11230802                                                                                                       | N-Term(iTRAQ4plex)                                   | 1496.72905 | 82 | 66  |      | 4.92 | Expt2 |
| SAELGCTVDEVESLIK          | 3   | 55926127                                                                                                       | N-Term(iTRAQ4plex), C6(Methylthio), K16(iTRAQ4plex)  | 2027.03244 | 82 | 67  |      | 4.24 | Expt2 |
| APQVYILPPPAEQLSR          | 42  | 149263750                                                                                                      | N-Term(iTRAQ4plex)                                   | 1923.08623 | 82 | 72  |      | 4.25 | Expt2 |
| GATQQILDEAER              | 15  | 126521835                                                                                                      | N-Term(iTRAQ4plex)                                   | 1474.76091 | 82 | 78  |      | 4.75 | Expt2 |
| OPAIMPQOSYGLDGCSCYK       | 6   | 183980004                                                                                                      | N-Term(iTRAQ4plex), C17(Methylthio), K20(iTRAQ4plex) | 2465.14267 | 82 | 86  |      | 5.14 | Expt2 |
| QNLPEMFEQIYNLNR           | 95  | 54607171;113195684                                                                                             | N-Term(iTRAQ4plex), M6(Oxidation)                    | 2042.01395 | 82 | 72  | 1.45 | 5.80 | Expt2 |
| DAEDAMDAMDGAVALDGR        | 12  | 6755478                                                                                                        | N-Term(iTRAQ4plex), M6(Oxidation), M9(Oxidation)     | 1927.81546 | 82 | 80  |      | 5.74 | Expt2 |
| DLDDFQSWLSR               | 6   | 117938332;117938334                                                                                            | N-Term(iTRAQ4plex)                                   | 1525.74455 | 82 | 64  |      | 4.16 | Expt2 |
| IQPSGGTININEALLR          | 11  | 226874935                                                                                                      | N-Term(iTRAQ4plex)                                   | 1726.96037 | 82 | 86  |      | 4.76 | Expt2 |
| VYDPSTSSLSVR              | 42  | 111074529                                                                                                      | N-Term(iTRAQ4plex)                                   | 1454.76055 | 82 | 66  |      | 4.16 | Expt2 |
| GCDVVVPIAGVPR             | 19  | 31982186                                                                                                       | N-Term(iTRAQ4plex), C2(Methylthio)                   | 1471.78899 | 81 | 53  | 1.38 | 4.49 | Expt2 |
| YTAILNQIPSOSSSIR          | 23  | 226423922                                                                                                      | N-Term(iTRAQ4plex)                                   | 1922.04949 | 81 | 81  | 1.10 | 4.63 | Expt2 |
| VFLLEGEVAGYDYGAYK         | 5   | 18152793                                                                                                       | N-Term(iTRAQ4plex), K16(iTRAQ4plex)                  | 2090.10678 | 81 | 66  |      | 4.62 | Expt2 |
| TLEAVQDLLEQGR             | 15  | 93102409                                                                                                       | N-Term(iTRAQ4plex)                                   | 1615.88054 | 81 | 76  |      | 4.88 | Expt2 |
| ELGEYGLQAYTEVK            | 15  | 6753036                                                                                                        | N-Term(iTRAQ4plex), K14(iTRAQ4plex)                  | 1887.99883 | 81 | 99  |      | 5.39 | Expt2 |
| IIQLDDYPK                 | 22  | 94369748;94383772;6671569                                                                                      | N-Term(iTRAQ4plex), K10(iTRAQ4plex)                  | 1505.88884 | 81 | 76  | 1.68 | 4.60 | Expt2 |
| TADVQIYVNPVTVK            | 3   | 133778947                                                                                                      | N-Term(iTRAQ4plex), K14(iTRAQ4plex)                  | 1835.05937 | 81 | 67  |      | 4.77 | Expt2 |
| SLELQMSNPLDGEVQELCK       | 6   | 31981748;285402638;285402659                                                                                   | N-Term(iTRAQ4plex), C21(Methylthio), K22(iTRAQ4plex) | 2724.35465 | 81 | 86  |      | 7.31 | Expt2 |

|                                  |    |                                                   |                                                                      |            |    |     |      |      |       |
|----------------------------------|----|---------------------------------------------------|----------------------------------------------------------------------|------------|----|-----|------|------|-------|
| NAFINOPTAELHPNGLPPSYTILLFR       | 3  | 111074529                                         | N-Term(iTRAQ4plex)                                                   | 3180.73313 | 81 |     |      | 5.62 | Expt2 |
| YIVQNPEOEPLSPFLR                 | 25 | 31657132                                          | N-Term(iTRAQ4plex)                                                   | 2074.10796 | 81 | 69  |      | 5.04 | Expt2 |
| VCENIPVILCGNK                    | 12 | 149260287;124487358;6677677                       | N-Term(iTRAQ4plex), C2(Methylthio), C10(Methylthio), K13(iTRAQ4plex) | 1781.90000 | 81 | 81  |      | 4.14 | Expt2 |
| GDGGPPGMTGFFGAAGR                | 65 | 111120329                                         | N-Term(iTRAQ4plex), M8(Oxidation)                                    | 1661.78374 | 81 | 72  |      | 4.43 | Expt2 |
| VGLIGSCTNSSYEDMGR                | 6  | 18079339                                          | N-Term(iTRAQ4plex), C7(Methylthio)                                   | 1978.87822 | 81 | 124 |      | 4.76 | Expt2 |
| SGSGTMMNLGSLTR                   | 5  | 6753262;83649737                                  | N-Term(iTRAQ4plex)                                                   | 1481.75224 | 81 | 88  |      | 5.50 | Expt2 |
| YSPNSSCFGEESLAFCEK               | 17 | 148277039                                         | N-Term(iTRAQ4plex), C7(Methylthio), C16(Methylthio), K18(iTRAQ4plex) | 2378.00371 | 81 | 99  | 0.99 | 6.15 | Expt2 |
| DLTTAGAVTQCVR                    | 26 | 149240702;162287138;58037465                      | N-Term(iTRAQ4plex), C11(Methylthio)                                  | 1588.75774 | 81 | 66  |      | 5.27 | Expt2 |
| SFEDTIAQGITFK                    | 5  | 83921612                                          | N-Term(iTRAQ4plex), K14(iTRAQ4plex)                                  | 1844.01285 | 81 | 48  |      | 4.58 | Expt2 |
| TLETPAAQMEGLNR                   | 12 | 117938332                                         | N-Term(iTRAQ4plex)                                                   | 1821.93340 | 81 | 76  | 1.15 | 5.51 | Expt2 |
| YSLPVAALNK                       | 26 | 70778976                                          | N-Term(iTRAQ4plex), K11(iTRAQ4plex)                                  | 1507.86223 | 81 | 83  |      | 4.71 | Expt2 |
| ATGPPVSELITK                     | 12 | 21426893                                          | N-Term(iTRAQ4plex), K12(iTRAQ4plex)                                  | 1500.88542 | 81 | 81  |      | 4.39 | Expt2 |
| TSAAPEICQEYSGTLR                 | 6  | 169234958;32129201;32129205                       | N-Term(iTRAQ4plex), C8(Methylthio)                                   | 1915.90190 | 81 | 92  |      | 5.03 | Expt2 |
| DFFTNNLFLK                       | 22 | 188219537                                         | N-Term(iTRAQ4plex), K10(iTRAQ4plex)                                  | 1533.86296 | 81 | 77  | 1.21 | 4.93 | Expt2 |
| GELEDLTDSTNAQQLR                 | 7  | 29336026                                          | N-Term(iTRAQ4plex)                                                   | 2062.99883 | 81 | 109 |      | 5.13 | Expt2 |
| ATEMVEVGPEDDEVGAER               | 12 | 6679567                                           | N-Term(iTRAQ4plex)                                                   | 2076.95268 | 81 | 81  |      | 4.43 | Expt2 |
| ECNACLNPEGNLCIR                  | 68 | 31560625                                          | N-Term(iTRAQ4plex), C2(Methylthio), C5(Methylthio), C13(Methylthio)  | 1930.78826 | 81 | 68  | 1.23 | 5.08 | Expt2 |
| LOSIGTENTEENR                    | 3  | 6671539                                           | N-Term(iTRAQ4plex)                                                   | 1634.81255 | 81 | 69  |      | 4.94 | Expt2 |
| GMNTMTGDIDYLVK                   | 19 | 111074529                                         | N-Term(iTRAQ4plex), M5(Oxidation), K15(iTRAQ4plex)                   | 1858.94988 | 81 | 91  |      | 4.41 | Expt2 |
| LFVGNLPADITDEFK                  | 3  | 149252953;23956214                                | N-Term(iTRAQ4plex), K16(iTRAQ4plex)                                  | 2096.11979 | 81 | 68  |      | 4.77 | Expt2 |
| GALLOMDAIDLTK                    | 4  | 16537185                                          | N-Term(iTRAQ4plex), K14(iTRAQ4plex)                                  | 1791.98088 | 81 | 102 | 1.39 | 5.50 | Expt2 |
| SFESTVGGSDTSYIFR                 | 9  | 14916479                                          | N-Term(iTRAQ4plex)                                                   | 2188.03470 | 81 | 64  |      | 6.16 | Expt2 |
| SPYLYPLVGLGELPOGFAR              | 17 | 116089273;33859560                                | N-Term(iTRAQ4plex)                                                   | 2285.21372 | 81 | 71  |      | 6.76 | Expt2 |
| EMSGDLEQGLMAVVK                  | 8  | 149265356;149265358;160707921                     | N-Term(iTRAQ4plex), K15(iTRAQ4plex)                                  | 1894.98662 | 81 | 97  | 0.99 | 4.85 | Expt2 |
| AOSLESLYMINTQDR                  | 4  | 70909345                                          | N-Term(iTRAQ4plex)                                                   | 2013.99944 | 81 | 78  | 1.18 | 5.29 | Expt2 |
| GSGSSAMCGGAGFGSR                 | 25 | 54607171;113195684                                | N-Term(iTRAQ4plex), C9(Methylthio)                                   | 1635.68340 | 81 | 101 |      | 6.93 | Expt2 |
| IIGLDQVAGMSETALPGAFK             | 15 | 114326446                                         | N-Term(iTRAQ4plex), K20(iTRAQ4plex)                                  | 2306.27799 | 81 | 89  |      | 7.16 | Expt2 |
| NPELONLLDDFFK                    | 10 | 124486895                                         | N-Term(iTRAQ4plex), K14(iTRAQ4plex)                                  | 1994.08316 | 81 | 79  |      | 4.92 | Expt2 |
| SLDLFNCEVNLNAYR                  | 17 | 40254600                                          | N-Term(iTRAQ4plex), C7(Methylthio)                                   | 2061.99126 | 81 | 82  |      | 5.58 | Expt2 |
| YDMVTDCSYTVAQVR                  | 10 | 86439989                                          | N-Term(iTRAQ4plex), C7(Methylthio)                                   | 1940.86594 | 80 | 76  | 1.15 | 5.23 | Expt2 |
| GVGOADWTPDLGLR                   | 6  | 124486923                                         | N-Term(iTRAQ4plex)                                                   | 1628.85454 | 80 | 63  |      | 5.03 | Expt2 |
| LVLQVESLTTLSAER                  | 10 | 29336026                                          | N-Term(iTRAQ4plex)                                                   | 1932.08091 | 80 | 83  |      | 5.53 | Expt2 |
| EPVAETDIMITNGVVYAINTVLQPPANRPOER | 12 | 6678321                                           | N-Term(iTRAQ4plex), M9(Oxidation)                                    | 3653.88296 | 80 | 82  |      | 5.30 | Expt2 |
| VVLDPNETNEIANANSR                | 23 | 149258488;226958653;226958657;149234142;149258392 | N-Term(iTRAQ4plex)                                                   | 2087.02666 | 80 | 102 |      | 6.43 | Expt2 |
| VOYPTLTGLGQPLPSER                | 17 | 115647999                                         | N-Term(iTRAQ4plex)                                                   | 2000.09538 | 80 | 82  |      | 5.72 | Expt2 |
| AVAEPGIQLK                       | 6  | 162287140;6755781                                 | N-Term(iTRAQ4plex), K10(iTRAQ4plex)                                  | 1313.81426 | 80 | 65  |      | 3.97 | Expt2 |
| GVVPLAGTDGETTQGLDGLLER           | 16 | 60687506                                          | N-Term(iTRAQ4plex)                                                   | 2443.28940 | 80 | 106 | 1.40 | 5.82 | Expt2 |
| GYFNELSEILSDPSDDTK               | 17 | 82950147;82950149;149264086                       | N-Term(iTRAQ4plex), K19(iTRAQ4plex)                                  | 2447.17558 | 80 | 100 | 0.98 | 5.91 | Expt2 |
| NGYELSPTAANFTR                   | 18 | 227116345                                         | N-Term(iTRAQ4plex), N1(Deamidated)                                   | 1756.86736 | 80 | 82  |      | 4.83 | Expt2 |
| SGASTATAVTDVPSGNLAGAGEAGK        | 8  | 6753494                                           | N-Term(iTRAQ4plex), K25(iTRAQ4plex)                                  | 2477.27854 | 80 | 83  |      | 5.93 | Expt2 |
| ELETQISELOEDLESER                | 25 | 114326446                                         | N-Term(iTRAQ4plex)                                                   | 2192.07419 | 80 | 78  |      | 6.18 | Expt2 |
| SOAVTQLEAAILOEK                  | 22 | 111185907                                         | N-Term(iTRAQ4plex), K15(iTRAQ4plex)                                  | 1917.09848 | 80 | 64  | 0.97 | 6.64 | Expt2 |
| EEPEAVLPGAQPTLISAISK             | 6  | 93102409                                          | N-Term(iTRAQ4plex), K21(iTRAQ4plex)                                  | 2467.35697 | 80 | 68  |      | 5.71 | Expt2 |
| GFGTDEQAIVDVVSNR                 | 24 | 160707958                                         | N-Term(iTRAQ4plex)                                                   | 1850.94182 | 80 | 100 |      | 6.94 | Expt2 |
| VDQLTAQLADLAAR                   | 16 | 31543942                                          | N-Term(iTRAQ4plex)                                                   | 1628.91179 | 80 | 82  |      | 4.96 | Expt2 |
| FOILEGPPEMGR                     | 10 | 33859560                                          | N-Term(iTRAQ4plex)                                                   | 1604.82524 | 80 | 57  |      | 3.95 | Expt2 |
| GTGVVTSVPSDDLAALR                | 4  | 120537241                                         | N-Term(iTRAQ4plex)                                                   | 2101.09599 | 80 | 78  |      | 4.30 | Expt2 |
| SSEPVQLTEAETEFVFR                | 3  | 8567340                                           | N-Term(iTRAQ4plex)                                                   | 2129.05405 | 80 | 57  |      | 5.28 | Expt2 |
| DTNGSOFFITVK                     | 4  | 71774133                                          | N-Term(iTRAQ4plex), N3(Deamidated), K13(iTRAQ4plex)                  | 1746.92485 | 80 | 74  |      | 5.02 | Expt2 |
| VFIGNLTLVVK                      | 9  | 8393544;283436180;283436176;283436182             | N-Term(iTRAQ4plex), K12(iTRAQ4plex)                                  | 1605.00542 | 80 | 82  |      | 5.18 | Expt2 |
| GFGDGYNGYGGGPGGGNGGSPGYGGGR      | 4  | 149274531;109134362                               | N-Term(iTRAQ4plex), N7(Deamidated)                                   | 2640.13401 | 80 | 104 |      | 5.28 | Expt2 |
| GLLPEELTPILLETOK                 | 16 | 227500281                                         | N-Term(iTRAQ4plex), K16(iTRAQ4plex)                                  | 2082.23516 | 80 | 65  |      | 5.97 | Expt2 |
| AVFOYIDENODR                     | 12 | 31981273                                          | N-Term(iTRAQ4plex)                                                   | 1641.79802 | 80 | 59  |      | 4.84 | Expt2 |

|                            |     |                                                          |                                                                     |            |    |     |      |      |       |
|----------------------------|-----|----------------------------------------------------------|---------------------------------------------------------------------|------------|----|-----|------|------|-------|
| NMQDLVEDYK                 | 48  | 20911031                                                 | N-Term(iTRAQ4plex), K10(iTRAQ4plex)                                 | 1542.77385 | 80 | 77  | 1.18 | 4.81 | Expt2 |
| SNLAYDIVOLPTGLTIK          | 9   | 112293266                                                | N-Term(iTRAQ4plex), K18(iTRAQ4plex)                                 | 2191.25981 | 80 | 93  |      | 5.21 | Expt2 |
| NEGATYAAAVLFR              | 25  | 28395018                                                 | N-Term(iTRAQ4plex)                                                  | 1627.85869 | 80 | 87  |      | 5.99 | Expt2 |
| VDPVPAADLSDOVPDTSETR       | 21  | 126518317                                                | N-Term(iTRAQ4plex)                                                  | 2274.08867 | 80 | 134 |      | 5.95 | Expt2 |
| QPDGIAVVGIFLK              | 33  | 31982861                                                 | N-Term(iTRAQ4plex), K13(iTRAQ4plex)                                 | 1644.99858 | 80 | 93  |      | 4.93 | Expt2 |
| VIESTOGLGNDLAGVLALQR       | 9   | 55926127                                                 | N-Term(iTRAQ4plex)                                                  | 2198.23111 | 80 | 94  | 1.03 | 6.29 | Expt2 |
| NATNVEQAFMTMAAEIK          | 3   | 21313162                                                 | N-Term(iTRAQ4plex), K17(iTRAQ4plex)                                 | 2157.09867 | 80 | 61  |      | 6.73 | Expt2 |
| ALAVGATECISPK              | 25  | 31560625                                                 | N-Term(iTRAQ4plex), C9(Methylthio), K13(iTRAQ4plex)                 | 1593.86394 | 80 | 90  | 1.45 | 5.62 | Expt2 |
| AGGIETIANEYSDR             | 5   | 112293266                                                | N-Term(iTRAQ4plex)                                                  | 1639.80620 | 80 | 75  |      | 4.25 | Expt2 |
| ELAPYDENWFYTR              | 13  | 149249753;94397093;82996042;82996939;12963511            | N-Term(iTRAQ4plex)                                                  | 1847.87432 | 79 | 76  |      | 4.76 | Expt2 |
| DTGVISVLTSGLDR             | 28  | 6753374                                                  | N-Term(iTRAQ4plex)                                                  | 1576.87163 | 79 | 74  |      | 4.31 | Expt2 |
| LTPREEEILNK                | 4   | 149257598;149250154;82922494;28491531;94387984;149264053 | N-Term(iTRAQ4plex), K11(iTRAQ4plex)                                 | 1602.88823 | 79 | 55  |      | 4.27 | Expt2 |
| QQLSAEELDAQLDAYNAR         | 9   | 6755763                                                  | N-Term(iTRAQ4plex)                                                  | 2179.07224 | 79 | 78  |      | 5.70 | Expt2 |
| AILVDLEPGTMSVSR            | 43  | 33859488;7106439;21746161;12963615                       | N-Term(iTRAQ4plex), M11(Oxidation)                                  | 1775.93730 | 79 | 70  |      | 3.98 | Expt2 |
| DGLLPEDTFIVGYAR            | 23  | 6996917                                                  | N-Term(iTRAQ4plex)                                                  | 1809.95769 | 79 | 82  |      | 4.73 | Expt2 |
| LCYVALDFEQEMATAASSSLEK     | 7   | 6671509;6752954                                          | N-Term(iTRAQ4plex), C2(Methylthio), M12(Oxidation), K23(iTRAQ4plex) | 2843.34098 | 79 | 63  | 1.66 | 6.02 | Expt2 |
| ECYCPDPFSAALYCDNR          | 23  | 229608920                                                | N-Term(iTRAQ4plex), C2(Methylthio), C4(Methylthio), C14(Methylthio) | 2247.85343 | 79 | 60  |      | 4.40 | Expt2 |
| LDOEDALLGSYPVDDGCR         | 3   | 170650659                                                | N-Term(iTRAQ4plex), C17(Methylthio)                                 | 2155.97685 | 79 | 63  |      | 4.45 | Expt2 |
| QTVEADINGLR                | 107 | 118130981                                                | N-Term(iTRAQ4plex), N8(Deamidated)                                  | 1360.72209 | 79 | 78  |      | 4.39 | Expt2 |
| ISWAMEDSDLER               | 5   | 22122427                                                 | N-Term(iTRAQ4plex)                                                  | 1595.74907 | 79 | 50  |      | 4.12 | Expt2 |
| EIVDTWDESSGFLPVPER         | 6   | 115647999                                                | N-Term(iTRAQ4plex)                                                  | 2307.12895 | 79 | 112 |      | 5.74 | Expt2 |
| SPDFTINPLETR               | 23  | 21450277                                                 | N-Term(iTRAQ4plex)                                                  | 1663.80864 | 79 | 83  |      | 4.97 | Expt2 |
| GLPSPYMSAPGSR              | 7   | 82950147;82950149;149264086                              | N-Term(iTRAQ4plex)                                                  | 1577.78777 | 79 | 78  |      | 3.78 | Expt2 |
| AATQELALLISR               | 29  | 111185907                                                | N-Term(iTRAQ4plex)                                                  | 1429.85454 | 79 | 87  |      | 5.14 | Expt2 |
| VNQGVSITESIQACK            | 28  | 149253386;6679651                                        | N-Term(iTRAQ4plex), C14(Methylthio), K15(iTRAQ4plex)                | 1910.99578 | 79 | 88  | 1.01 | 6.32 | Expt2 |
| LNTQEIFDDWAR               | 3   | 134288917                                                | N-Term(iTRAQ4plex)                                                  | 1651.82182 | 79 | 69  |      | 4.59 | Expt2 |
| VSGISMDVAVPENTGQDSAR       | 8   | 183979966                                                | N-Term(iTRAQ4plex)                                                  | 2177.05986 | 79 | 114 |      | 5.52 | Expt2 |
| SLLQAVANLPYK               | 48  | 111074529                                                | N-Term(iTRAQ4plex), K12(iTRAQ4plex)                                 | 1604.96037 | 79 | 81  | 1.40 | 5.72 | Expt2 |
| QEDFELCPDGTR               | 18  | 20330802                                                 | N-Term(iTRAQ4plex), C8(Methylthio)                                  | 1712.78008 | 79 | 85  |      | 4.81 | Expt2 |
| GYSGLQGLPGLAGHDQAGPVPVAGPR | 6   | 111120329                                                | N-Term(iTRAQ4plex)                                                  | 2897.51364 | 79 | 48  |      | 5.82 | Expt2 |
| MTLSDPSEMDELMSSEAYEK       | 3   | 13386066                                                 | N-Term(iTRAQ4plex), K20(iTRAQ4plex)                                 | 2623.17899 | 79 | 51  |      | 6.10 | Expt2 |
| GILFVGSVGGEEGAR            | 33  | 124486895                                                | N-Term(iTRAQ4plex)                                                  | 1735.91094 | 79 | 96  | 1.15 | 5.46 | Expt2 |
| EDYIEFASLDGNSR             | 3   | 124494256                                                | N-Term(iTRAQ4plex)                                                  | 1759.82195 | 79 | 70  |      | 4.46 | Expt2 |
| TLEQLGLINDLQR              | 24  | 82950147;149264086                                       | N-Term(iTRAQ4plex)                                                  | 1656.94267 | 79 | 83  |      | 5.68 | Expt2 |
| GALPLDTVTFYK               | 6   | 19526463                                                 | N-Term(iTRAQ4plex), K12(iTRAQ4plex)                                 | 1612.92424 | 79 | 70  |      | 3.85 | Expt2 |
| FEDGDLTYQSNAILR            | 12  | 149246605;32401425;10092608                              | N-Term(iTRAQ4plex)                                                  | 1999.02939 | 79 | 69  |      | 5.19 | Expt2 |
| EFADSLGVPFLETSK            | 15  | 21313162                                                 | N-Term(iTRAQ4plex), K16(iTRAQ4plex)                                 | 1999.06584 | 79 | 95  |      | 4.83 | Expt2 |
| DIELVMSQANVSR              | 20  | 41350312;163965357                                       | N-Term(iTRAQ4plex)                                                  | 1605.83750 | 79 | 74  | 1.01 | 4.87 | Expt2 |
| ECFCPPSPFTALYCENR          | 46  | 6680554                                                  | N-Term(iTRAQ4plex), C2(Methylthio), C4(Methylthio), C14(Methylthio) | 2258.90019 | 79 | 78  |      | 6.90 | Expt2 |
| LIGNMALLPLR                | 3   | 9790141                                                  | N-Term(iTRAQ4plex)                                                  | 1354.83904 | 79 | 47  |      | 4.51 | Expt2 |
| ETGEAVDLGAAGADR            | 6   | 27734136                                                 | N-Term(iTRAQ4plex)                                                  | 1632.79656 | 79 | 96  |      | 5.27 | Expt2 |
| FAAATGATPIAGR              | 24  | 149251929;82905443;51766344;51770420;149270876           | N-Term(iTRAQ4plex)                                                  | 1347.75090 | 79 | 77  |      | 4.46 | Expt2 |
| TLVLSNLSYSATK              | 11  | 84875537                                                 | N-Term(iTRAQ4plex), K13(iTRAQ4plex)                                 | 1684.97624 | 79 | 98  |      | 4.71 | Expt2 |
| IINEPTAAAIYGLDK            | 29  | 124339838;50345978;31981690;254540166                    | N-Term(iTRAQ4plex), K16(iTRAQ4plex)                                 | 1948.10600 | 79 | 117 |      | 6.24 | Expt2 |
| VLFAEQEIPASFR              | 4   | 145966915                                                | N-Term(iTRAQ4plex)                                                  | 1705.94402 | 78 | 67  |      | 4.98 | Expt2 |
| DTTINEIEDTFR               | 6   | 21314824                                                 | N-Term(iTRAQ4plex)                                                  | 1597.78118 | 78 | 74  |      | 4.97 | Expt2 |
| FEELNADLFR                 | 30  | 50345978;31981690                                        | N-Term(iTRAQ4plex)                                                  | 1397.72014 | 78 | 61  |      | 4.01 | Expt2 |
| GFPTIYFSPANR               | 10  | 112293264                                                | N-Term(iTRAQ4plex), K12(iTRAQ4plex)                                 | 1629.89470 | 78 | 70  |      | 4.37 | Expt2 |
| EVIELPLTNPELFOR            | 27  | 27754103                                                 | N-Term(iTRAQ4plex)                                                  | 1942.08257 | 78 | 86  |      | 4.97 | Expt2 |
| EALTYDGLLGR                | 30  | 15808988                                                 | N-Term(iTRAQ4plex)                                                  | 1537.79790 | 78 | 79  |      | 4.81 | Expt2 |
| ATSNVAMFDQSQIQEFK          | 11  | 21728376;71037403;198278553                              | N-Term(iTRAQ4plex), M8(Oxidation), K18(iTRAQ4plex)                  | 2395.19455 | 78 | 88  | 1.20 | 5.45 | Expt2 |
| IVODASLTYYQLR              | 19  | 111185907                                                | N-Term(iTRAQ4plex)                                                  | 1678.92546 | 78 | 65  |      | 5.20 | Expt2 |

|                        |     |                                                                                      |                                                                    |            |    |    |      |      |       |
|------------------------|-----|--------------------------------------------------------------------------------------|--------------------------------------------------------------------|------------|----|----|------|------|-------|
| GLGPLAEAAAAGDGAAGAAR   | 5   | 61098078                                                                             | N-Term(iTRAQ4plex)                                                 | 1953.02226 | 78 | 93 |      | 5.44 | Expt2 |
| YVIPTTFEPHGTEFLLR      | 9   | 6680846                                                                              | N-Term(iTRAQ4plex)                                                 | 2334.26822 | 78 | 44 |      | 5.02 | Expt2 |
| CPAPNLEGGSPVFIFFPNIK   | 24  | 149263750                                                                            | N-Term(iTRAQ4plex), C1(Methylthio), K20(iTRAQ4plex)                | 2431.27384 | 78 | 67 |      | 5.94 | Expt2 |
| IFNSGADLSGI TEENAPLK   | 9   | 6678087                                                                              | N-Term(iTRAQ4plex), K19(iTRAQ4plex)                                | 2264.20493 | 78 | 54 | 1.11 | 6.93 | Expt2 |
| AFMTADLPNELIELLEK      | 4   | 51491845                                                                             | N-Term(iTRAQ4plex), M3(Oxidation), K17(iTRAQ4plex)                 | 2251.21762 | 78 | 42 |      | 5.01 | Expt2 |
| OLYAVDDGQYIVYK         | 6   | 86439989                                                                             | N-Term(iTRAQ4plex), K14(iTRAQ4plex)                                | 2050.05136 | 78 | 60 |      | 4.47 | Expt2 |
| IIPGFMCOGGDFTR         | 16  | 149257773:6679439                                                                    | N-Term(iTRAQ4plex), M6(Oxidation), C7(Methylthio)                  | 1747.81133 | 78 | 73 |      |      | Expt2 |
| TIPIDGDFSYTR           | 13  | 6753036                                                                              | N-Term(iTRAQ4plex)                                                 | 1675.84966 | 78 | 62 |      | 3.93 | Expt2 |
| QLEEEEEEQR             | 12  | 114326446                                                                            | N-Term(iTRAQ4plex)                                                 | 1475.71160 | 78 | 61 |      | 4.27 | Expt2 |
| FPLTTESAMK             | 9   | 149265809;149233872;82915863;82905418;94388464;94388502;94388507;149265307;149266479 | N-Term(iTRAQ4plex), K10(iTRAQ4plex)                                | 1412.77861 | 78 | 68 |      |      | Expt2 |
| AAGVSVEFPWPGLFAK       | 40  | 94371594;149252277;94381084;149259080;9256519                                        | N-Term(iTRAQ4plex), K16(iTRAQ4plex)                                | 1964.08965 | 78 | 94 |      | 6.03 | Expt2 |
| SVPADIFOMQATTR         | 38  | 6753824                                                                              | N-Term(iTRAQ4plex)                                                 | 1708.88078 | 78 | 87 |      | 4.80 | Expt2 |
| VDALMDEINFMK           | 72  | 20911031                                                                             | N-Term(iTRAQ4plex), M5(Oxidation), M11(Oxidation), K12(iTRAQ4plex) | 1745.87400 | 78 | 71 |      | 5.61 | Expt2 |
| CGEDEDTPAEYR           | 3   | 33563246                                                                             | N-Term(iTRAQ4plex), C1(Methylthio)                                 | 1673.69170 | 78 | 60 |      | 5.03 | Expt2 |
| ASLEAAIADAEOR          | 22  | 114145561                                                                            | N-Term(iTRAQ4plex)                                                 | 1488.78240 | 78 | 74 |      | 5.03 | Expt2 |
| AVTGYTDPYTDQISLFOAMOR  | 11  | 37537522                                                                             | N-Term(iTRAQ4plex), M20(Oxidation)                                 | 2622.27134 | 78 | 83 | 1.53 | 7.45 | Expt2 |
| ALPFWNEIVPOIK          | 39  | 114326546                                                                            | N-Term(iTRAQ4plex), K14(iTRAQ4plex)                                | 1972.12259 | 78 | 67 |      | 5.13 | Expt2 |
| LGLPPLTEQOEALQK        | 3   | 76677895;257196186;257196183                                                         | N-Term(iTRAQ4plex), K16(iTRAQ4plex)                                | 2050.18302 | 78 | 50 |      | 5.01 | Expt2 |
| TIGVSNFNPLQIER         | 39  | 160707894                                                                            | N-Term(iTRAQ4plex)                                                 | 1731.95195 | 78 | 88 |      | 5.20 | Expt2 |
| GDLGIEIPA EK           | 11  | 153792772;153792131;31981562                                                         | N-Term(iTRAQ4plex), K11(iTRAQ4plex)                                | 1429.82085 | 78 | 58 |      | 3.95 | Expt2 |
| LSEEEIENQDLFLTSEATDYGR | 5   | 114205428                                                                            | N-Term(iTRAQ4plex)                                                 | 2816.36917 | 78 | 77 |      | 5.57 | Expt2 |
| GTGGVDTAATGSVFDISNLDR  | 5   | 6753428                                                                              | N-Term(iTRAQ4plex)                                                 | 2197.09000 | 78 | 62 |      | 5.83 | Expt2 |
| VTWDSSFCVAVNPR         | 15  | 31542413                                                                             | N-Term(iTRAQ4plex), C8(Methylthio)                                 | 1671.77519 | 78 | 72 |      | 4.99 | Expt2 |
| YGVDMYIEQSGPPSK        | 13  | 86198316                                                                             | N-Term(iTRAQ4plex), K16(iTRAQ4plex)                                | 2072.06328 | 78 | 82 | 1.23 | 5.32 | Expt2 |
| ALDIAENEMPLGMR         | 9   | 149267883;262263372                                                                  | N-Term(iTRAQ4plex)                                                 | 1703.86174 | 78 | 70 |      | 4.92 | Expt2 |
| YGINTTDIFQTVDLWEGK     | 3   | 30519911                                                                             | N-Term(iTRAQ4plex), K18(iTRAQ4plex)                                | 2388.23984 | 78 | 51 |      | 6.88 | Expt2 |
| VEEEIOTLSQVLA AK       | 17  | 70608194;70608205;70608198;6678407;70608214                                          | N-Term(iTRAQ4plex), K15(iTRAQ4plex)                                | 1946.11319 | 78 | 66 |      | 5.54 | Expt2 |
| DAVIYPILVEFTR          | 11  | 157951706                                                                            | N-Term(iTRAQ4plex)                                                 | 1679.95403 | 78 | 73 |      | 4.73 | Expt2 |
| TTIPEEEEEEEPIGVAVEEER  | 25  | 188219589                                                                            | N-Term(iTRAQ4plex)                                                 | 2816.30327 | 78 | 93 |      | 5.83 | Expt2 |
| ACLISLGYDVENDR         | 25  | 11230802                                                                             | N-Term(iTRAQ4plex), C2(Methylthio)                                 | 1757.83452 | 78 | 90 |      | 5.16 | Expt2 |
| VIPLFSQQCGECR          | 28  | 6724311                                                                              | N-Term(iTRAQ4plex), C9(Methylthio), C12(Methylthio)                | 1684.78093 | 77 | 66 |      | 4.79 | Expt2 |
| MVVLTSPOVSDSMR         | 29  | 7305121                                                                              | N-Term(iTRAQ4plex)                                                 | 1693.87505 | 77 | 70 | 1.21 | 4.71 | Expt2 |
| TPAAVLPTPVAVSOPIR      | 16  | 145587092                                                                            | N-Term(iTRAQ4plex)                                                 | 1861.11174 | 77 | 82 |      | 4.27 | Expt2 |
| GAFSNPETLDLYR          | 5   | 21313520                                                                             | N-Term(iTRAQ4plex)                                                 | 1626.82402 | 77 | 73 |      | 4.24 | Expt2 |
| IQAIELEDLLR            | 170 | 20137008                                                                             | N-Term(iTRAQ4plex), O2(Deamidated)                                 | 1457.83452 | 77 | 71 | 1.20 | 4.89 | Expt2 |
| DPEGOPGGELMLGGTDSK     | 6   | 6753556                                                                              | N-Term(iTRAQ4plex), K18(iTRAQ4plex)                                | 2076.01738 | 77 | 89 |      | 4.90 | Expt2 |
| ELEVAESDGOVELER        | 8   | 7949018                                                                              | N-Term(iTRAQ4plex)                                                 | 1846.91423 | 77 | 83 |      | 4.30 | Expt2 |
| ITLDNAVMEK             | 5   | 31981562                                                                             | N-Term(iTRAQ4plex), K10(iTRAQ4plex)                                | 1485.79119 | 77 | 75 |      | 4.82 | Expt2 |
| ALEAANADLEVK           | 5   | 6754480                                                                              | N-Term(iTRAQ4plex), K12(iTRAQ4plex)                                | 1531.86479 | 77 | 84 |      | 5.39 | Expt2 |
| SDNVPPPTDLQFVELTDVK    | 20  | 46849812                                                                             | N-Term(iTRAQ4plex), K19(iTRAQ4plex)                                | 2402.27524 | 77 | 64 | 0.97 | 5.47 | Expt2 |
| FVFGTTPEDILR           | 4   | 149249577;47059073                                                                   | N-Term(iTRAQ4plex)                                                 | 1538.83818 | 77 | 55 |      | 4.55 | Expt2 |
| AFYPEEISSMVLTK         | 23  | 124339838                                                                            | N-Term(iTRAQ4plex), K14(iTRAQ4plex)                                | 1903.01548 | 77 | 62 |      | 3.94 | Expt2 |
| YTLNVLLEDLGGQK         | 5   | 21704120;262050551                                                                   | N-Term(iTRAQ4plex), K14(iTRAQ4plex)                                | 1867.01116 | 77 | 99 |      | 5.17 | Expt2 |
| LNDSILOATEOR           | 37  | 82950147;149264086                                                                   | N-Term(iTRAQ4plex)                                                 | 1531.82158 | 77 | 67 |      | 4.82 | Expt2 |
| QTQVSLVPEGGETPLFK      | 17  | 28916693                                                                             | N-Term(iTRAQ4plex), K17(iTRAQ4plex)                                | 2118.17095 | 77 | 77 |      | 5.09 | Expt2 |
| VPPLIASFVR             | 267 | 6754090                                                                              | N-Term(iTRAQ4plex)                                                 | 1242.77300 | 77 | 57 |      |      | Expt2 |
| QVCEQLISGQMSR          | 31  | 111074529                                                                            | N-Term(iTRAQ4plex), C3(Methylthio)                                 | 1668.80107 | 77 | 64 |      | 4.68 | Expt2 |
| QSFTMVADTPENLR         | 9   | 6754508                                                                              | N-Term(iTRAQ4plex)                                                 | 1752.87712 | 77 | 86 |      | 5.64 | Expt2 |
| VTPPEGYDVTVFRE         | 27  | 158635992                                                                            | N-Term(iTRAQ4plex)                                                 | 1851.96697 | 77 | 69 |      | 5.44 | Expt2 |
| DSLLODGEFTMDLR         | 32  | 6755040                                                                              | N-Term(iTRAQ4plex), M11(Oxidation)                                 | 1799.86228 | 77 | 69 |      | 5.18 | Expt2 |
| DLMVGEASELR            | 21  | 22122825                                                                             | N-Term(iTRAQ4plex)                                                 | 1478.73137 | 77 | 66 |      | 4.24 | Expt2 |
| EEAESTLQSFRR           | 31  | 31982755                                                                             | N-Term(iTRAQ4plex)                                                 | 1440.70879 | 77 | 74 |      | 4.24 | Expt2 |
| GTITAAAGFDPLR          | 5   | 160707921                                                                            | N-Term(iTRAQ4plex)                                                 | 1449.78203 | 77 | 62 |      | 4.93 | Expt2 |

|                             |     |                                                                                                                         |                                                                                   |            |    |     |      |      |       |
|-----------------------------|-----|-------------------------------------------------------------------------------------------------------------------------|-----------------------------------------------------------------------------------|------------|----|-----|------|------|-------|
| GIMDEDDACGR                 | 20  | 28395018                                                                                                                | N-Term(iTRAQ4plex), C9(Methylthio)                                                | 1371.54546 | 77 | 66  |      | 3.95 | Expt2 |
| ASEWLDQPSWSGR               | 6   | 13384758                                                                                                                | N-Term(iTRAQ4plex)                                                                | 1790.85845 | 77 | 66  | 1.09 | 4.51 | Expt2 |
| LPGGGLDPEVVEVYSLPEELQK      | 8   | 7949018                                                                                                                 | N-Term(iTRAQ4plex), K21(iTRAQ4plex)                                               | 2557.36626 | 77 | 92  |      | 5.01 | Expt2 |
| LLLPGLAK                    | 50  | 68131547;68226433;30061385;149264032;160420312;46049029;28316750;28316760;68226431;160420308;30089704;30061387;13386452 | N-Term(iTRAQ4plex), K9(iTRAQ4plex)                                                | 1241.81206 | 77 | 67  |      | 3.57 | Expt2 |
| LLVLEADSAIAK                | 14  | 112421039                                                                                                               | N-Term(iTRAQ4plex), K13(iTRAQ4plex)                                               | 1694.00505 | 77 | 95  |      | 4.46 | Expt2 |
| LPOVSPADSGDYVCR             | 5   | 149253040;183979966                                                                                                     | N-Term(iTRAQ4plex), C14(Methylthio)                                               | 1796.84465 | 77 | 84  |      | 4.06 | Expt2 |
| EELSNVLAAMR                 | 15  | 149262233;149249185;149255394;82922589;94385943;51827816;149262863                                                      | N-Term(iTRAQ4plex)                                                                | 1376.73491 | 77 | 70  |      | 4.50 | Expt2 |
| ATGVFTTLOPLR                | 12  | 46849812                                                                                                                | N-Term(iTRAQ4plex)                                                                | 1447.83891 | 77 | 64  |      | 4.52 | Expt2 |
| EEILDNWMNVFVGSQATNYGEDLTK   | 3   | 6677691                                                                                                                 | N-Term(iTRAQ4plex), K24(iTRAQ4plex)                                               | 3062.46695 | 77 | 101 |      | 6.11 | Expt2 |
| SVNESLNNLFIITEEDYOALR       | 15  | 51491845                                                                                                                | N-Term(iTRAQ4plex)                                                                | 2499.25321 | 77 | 74  |      | 6.03 | Expt2 |
| ELILSSESPAVTPVPTPTLLIAPR    | 17  | 13385878                                                                                                                | N-Term(iTRAQ4plex)                                                                | 2633.50028 | 77 | 63  |      | 6.27 | Expt2 |
| VOANLDTDPINIEGPEAK          | 13  | 61743961                                                                                                                | N-Term(iTRAQ4plex), K18(iTRAQ4plex)                                               | 2212.16826 | 77 | 95  |      | 6.48 | Expt2 |
| ILGPLSYSK                   | 6   | 160333372                                                                                                               | N-Term(iTRAQ4plex), K9(iTRAQ4plex)                                                | 1265.77910 | 77 | 59  |      | 3.62 | Expt2 |
| FGGNPGGFGNGQGGFNSR          | 12  | 21704096                                                                                                                | N-Term(iTRAQ4plex)                                                                | 1870.87346 | 77 | 99  |      | 5.77 | Expt2 |
| MLTYDPMMLFTGR               | 59  | 31560625                                                                                                                | N-Term(iTRAQ4plex), M1(Oxidation)                                                 | 1717.88030 | 77 | 72  |      | 4.46 | Expt2 |
| LPCVEDYLSAILNR              | 21  | 163310765                                                                                                               | N-Term(iTRAQ4plex), C3(Methylthio)                                                | 1795.92937 | 76 | 68  | 1.04 | 5.61 | Expt2 |
| SYQDPSNAOFLESIR             | 3   | 38198665                                                                                                                | N-Term(iTRAQ4plex)                                                                | 1898.93682 | 76 | 92  |      | 4.76 | Expt2 |
| FAMPEEFDSOTLR               | 15  | 86198316                                                                                                                | N-Term(iTRAQ4plex), M3(Oxidation)                                                 | 1846.83452 | 76 | 83  |      | 3.85 | Expt2 |
| AISYLAAK                    | 26  | 160298217                                                                                                               | N-Term(iTRAQ4plex), K9(iTRAQ4plex)                                                | 1237.78337 | 76 | 74  |      | 4.15 | Expt2 |
| LTVADALEPVQFEDGOK           | 7   | 30794476                                                                                                                | N-Term(iTRAQ4plex), K17(iTRAQ4plex)                                               | 2148.14920 | 76 | 63  |      | 4.78 | Expt2 |
| GPLPAAPTAPER                | 9   | 34610241;34610235;34610233                                                                                              | N-Term(iTRAQ4plex)                                                                | 1417.79241 | 76 | 61  |      | 3.90 | Expt2 |
| GAQAAIVVYDITNTDTFAR         | 12  | 113866024                                                                                                               | N-Term(iTRAQ4plex)                                                                | 2170.13138 | 76 | 79  | 1.09 | 5.33 | Expt2 |
| YEDMAAFMK                   | 10  | 134023662                                                                                                               | N-Term(iTRAQ4plex), K9(iTRAQ4plex)                                                | 1393.68083 | 76 | 61  |      | 4.06 | Expt2 |
| GDOPGASGDNDDEPPPLPR         | 8   | 31980806                                                                                                                | N-Term(iTRAQ4plex)                                                                | 2192.97832 | 76 | 121 |      | 6.21 | Expt2 |
| EVVNVNLDQAQEMK              | 3   | 94364712;82617575                                                                                                       | N-Term(iTRAQ4plex), K15(iTRAQ4plex)                                               | 1988.06760 | 76 | 39  |      | 4.07 | Expt2 |
| SFLGGDPSMVDYLTWPWFOR        | 5   | 6754090                                                                                                                 | N-Term(iTRAQ4plex)                                                                | 2633.27250 | 76 | 69  |      | 7.44 | Expt2 |
| AMGSOVLDCSTLTSK             | 7   | 31560359                                                                                                                | N-Term(iTRAQ4plex), C10(Methylthio), K16(iTRAQ4plex)                              | 1974.00089 | 76 | 49  |      | 4.23 | Expt2 |
| GLTSEPTSVMEK                | 5   | 111074529                                                                                                               | N-Term(iTRAQ4plex), M11(Oxidation), K13(iTRAQ4plex)                               | 1669.85820 | 76 | 57  |      | 4.85 | Expt2 |
| GYADIVOLLAK                 | 3   | 22267440                                                                                                                | N-Term(iTRAQ4plex), K12(iTRAQ4plex)                                               | 1591.97234 | 76 | 96  |      | 5.36 | Expt2 |
| CVLTTVPDPTGIHDR             | 8   | 19526848                                                                                                                | N-Term(iTRAQ4plex), C1(Methylthio)                                                | 1807.90959 | 76 | 89  |      | 4.26 | Expt2 |
| LGFAGVQVEISFGTK             | 12  | 6671702                                                                                                                 | N-Term(iTRAQ4plex), K16(iTRAQ4plex)                                               | 1942.09897 | 76 | 74  |      | 5.19 | Expt2 |
| AALDEAQQVGLDSTGYDQEIYGGSDSR | 5   | 153791358                                                                                                               | N-Term(iTRAQ4plex)                                                                | 3081.40427 | 76 | 116 |      | 5.67 | Expt2 |
| ATENDIYNFSPLNPMR            | 7   | 9845253                                                                                                                 | N-Term(iTRAQ4plex)                                                                | 2173.05246 | 76 | 50  | 1.23 | 5.25 | Expt2 |
| MNVSPDVNYEELAR              | 3   | 228008337                                                                                                               | N-Term(iTRAQ4plex)                                                                | 1780.86809 | 76 | 80  |      | 4.25 | Expt2 |
| LTESPCALVASQYWSGNMER        | 9   | 6755863                                                                                                                 | N-Term(iTRAQ4plex), C6(Methylthio)                                                | 2489.14908 | 76 | 69  |      | 5.94 | Expt2 |
| C5LEPALAVSAPK               | 8   | 111185907                                                                                                               | N-Term(iTRAQ4plex), C1(Methylthio), K13(iTRAQ4plex)                               | 1619.87175 | 76 | 97  |      | 5.00 | Expt2 |
| VODDEVGDGTTSVTVLAAELLR      | 3   | 126521835                                                                                                               | N-Term(iTRAQ4plex)                                                                | 2432.26810 | 76 | 72  |      | 7.15 | Expt2 |
| EVYQQQYQSGGGR               | 5   | 146260280;6754222                                                                                                       | N-Term(iTRAQ4plex)                                                                | 1643.79399 | 76 | 59  |      | 4.70 | Expt2 |
| NIQETCMSQTGWNR              | 3   | 6996917                                                                                                                 | N-Term(iTRAQ4plex), C6(Methylthio)                                                | 1857.81706 | 76 | 64  |      | 5.45 | Expt2 |
| TQQAETALGSATADTOR           | 3   | 110624798                                                                                                               | N-Term(iTRAQ4plex)                                                                | 1892.94267 | 76 | 102 |      | 5.34 | Expt2 |
| NSSYFVVEIWNVVK              | 22  | 33859488;31981939;7106439;22165384;21746161;149253488;149253527;27754056;12963615                                       | N-Term(iTRAQ4plex), K14(iTRAQ4plex)                                               | 1985.04326 | 76 | 77  |      | 4.48 | Expt2 |
| NVTLPAVFK                   | 3   | 30794450                                                                                                                | N-Term(iTRAQ4plex), K9(iTRAQ4plex)                                                | 1276.79839 | 76 | 57  |      | 3.73 | Expt2 |
| TLSSMIMADTSGYYK             | 13  | 22165408                                                                                                                | N-Term(iTRAQ4plex), K15(iTRAQ4plex)                                               | 1955.97148 | 76 | 80  | 0.98 | 5.58 | Expt2 |
| GEPGSPGENGAPGQMGPR          | 31  | 34328108                                                                                                                | N-Term(iTRAQ4plex), N9(Deamidated), M15(Oxidation)                                | 1855.83867 | 76 | 73  |      | 4.51 | Expt2 |
| IYDDDFQNLGVDVANALDNIDAR     | 3   | 6678483                                                                                                                 | N-Term(iTRAQ4plex)                                                                | 2758.31870 | 76 | 104 |      | 5.76 | Expt2 |
| TPQISMSDIDLNVK              | 5   | 61743961                                                                                                                | N-Term(iTRAQ4plex), K14(iTRAQ4plex)                                               | 1849.00449 | 76 | 61  |      | 5.59 | Expt2 |
| SEAIASVDDAIR                | 10  | 21040233                                                                                                                | N-Term(iTRAQ4plex)                                                                | 1390.73088 | 76 | 83  |      | 4.38 | Expt2 |
| NMNCIEMGNPLENSGFEPGAFDGLK   | 30  | 20137008                                                                                                                | N-Term(iTRAQ4plex), M2(Oxidation), C4(Methylthio), M7(Oxidation), K26(iTRAQ4plex) | 3107.38144 | 76 | 66  |      | 5.73 | Expt2 |
| YYPLIEDLK                   | 337 | 149262636;118130981                                                                                                     | N-Term(iTRAQ4plex), K9(iTRAQ4plex)                                                | 1441.82231 | 76 | 79  |      | 4.46 | Expt2 |
| AAPGGASPTIFSR               | 3   | 110625719                                                                                                               | N-Term(iTRAQ4plex)                                                                | 1375.74614 | 76 | 78  |      | 4.16 | Expt2 |

|                               |     |                                                                                      |                                                                                        |            |    |     |      |      |       |
|-------------------------------|-----|--------------------------------------------------------------------------------------|----------------------------------------------------------------------------------------|------------|----|-----|------|------|-------|
| GVLDQESNPASR                  | 6   | 113866024                                                                            | N-Term(iTRAQ4plex)                                                                     | 1416.71965 | 76 | 76  |      | 4.46 | Expt2 |
| AFLTLAEDILR                   | 16  | 7710086                                                                              | N-Term(iTRAQ4plex)                                                                     | 1405.82170 | 76 | 70  |      | 4.58 | Expt2 |
| ANDDIIVNWNRR                  | 7   | 21704120;262050551                                                                   | N-Term(iTRAQ4plex)                                                                     | 1572.82585 | 76 | 59  |      | 4.38 | Expt2 |
| DVEAWFFSK                     | 11  | 226823220                                                                            | N-Term(iTRAQ4plex), K9(iTRAQ4plex)                                                     | 1416.74870 | 76 | 58  |      | 4.03 | Expt2 |
| YIIIGDTGVGK                   | 8   | 30525051;10946940                                                                    | N-Term(iTRAQ4plex), K11(iTRAQ4plex)                                                    | 1423.84905 | 76 | 68  | 0.99 |      | Expt2 |
| EVWEELDGLDPNR                 | 3   | 6679158;254750698                                                                    | N-Term(iTRAQ4plex)                                                                     | 1715.83940 | 76 | 55  |      | 4.65 | Expt2 |
| DTDTGALLFIGR                  | 31  | 117606335                                                                            | N-Term(iTRAQ4plex)                                                                     | 1422.77544 | 76 | 89  |      | 5.09 | Expt2 |
| LPSDVVEESAR                   | 70  | 148277039                                                                            | N-Term(iTRAQ4plex)                                                                     | 1345.70854 | 76 | 66  | 0.99 | 4.17 | Expt2 |
| WGDIEFPPFGR                   | 11  | 29293809                                                                             | N-Term(iTRAQ4plex)                                                                     | 1561.79289 | 76 | 58  |      | 3.71 | Expt2 |
| GVLVTQDELQTLLEFK              | 3   | 124249077                                                                            | N-Term(iTRAQ4plex), K17(iTRAQ4plex)                                                    | 2316.19187 | 75 | 72  |      | 4.76 | Expt2 |
| LALDVEIATYR                   | 218 | 29789317;85701680;20911031;133778<br>953;54607171;113195684                          | N-Term(iTRAQ4plex)                                                                     | 1407.80120 | 75 | 73  |      | 4.47 | Expt2 |
| DGGSITTOELQTVMR               | 4   | 13386230                                                                             | N-Term(iTRAQ4plex), M15(Oxidation)                                                     | 1839.88713 | 75 | 76  |      | 3.55 | Expt2 |
| EGMNIIVEAMER                  | 68  | 6679439                                                                              | N-Term(iTRAQ4plex)                                                                     | 1422.68535 | 75 | 66  |      | 4.85 | Expt2 |
| DQGTIEDYVEGLR                 | 15  | 33620739;94363353;94383790;149265<br>610;149266035                                   | N-Term(iTRAQ4plex)                                                                     | 1688.78984 | 75 | 80  |      | 5.03 | Expt2 |
| NLGSINTELQDVQR                | 3   | 6755448                                                                              | N-Term(iTRAQ4plex)                                                                     | 1730.91753 | 75 | 75  |      | 5.00 | Expt2 |
| EYOELMNVK                     | 12  | 29789317;149266993;85701680;54607<br>171;113195684;114145561;225903444;<br>269914154 | N-Term(iTRAQ4plex), K9(iTRAQ4plex)                                                     | 1441.76384 | 75 | 63  |      | 4.71 | Expt2 |
| LALFNPVDSWDR                  | 12  | 33563266                                                                             | N-Term(iTRAQ4plex)                                                                     | 1576.82561 | 75 | 61  |      | 4.34 | Expt2 |
| TIFAYFSGSK                    | 7   | 13386060                                                                             | N-Term(iTRAQ4plex), K10(iTRAQ4plex)                                                    | 1408.78118 | 75 | 79  |      | 3.91 | Expt2 |
| GVTFNVTIVDTK                  | 4   | 15617203                                                                             | N-Term(iTRAQ4plex), K12(iTRAQ4plex)                                                    | 1569.87383 | 75 | 68  |      | 4.14 | Expt2 |
| DLPSVQLLMK                    | 3   | 55926127                                                                             | N-Term(iTRAQ4plex), K10(iTRAQ4plex)                                                    | 1431.85344 | 75 | 68  |      | 3.95 | Expt2 |
| VIDIVPVDVVEGPMK               | 6   | 61743961                                                                             | N-Term(iTRAQ4plex), K16(iTRAQ4plex)                                                    | 2030.04485 | 75 | 91  |      | 4.42 | Expt2 |
| VSFELFADK                     | 13  | 14925773;6679439                                                                     | N-Term(iTRAQ4plex), K9(iTRAQ4plex)                                                     | 1343.75176 | 75 | 78  |      | 3.69 | Expt2 |
| OSVEADINGLR                   | 32  | 6754480;112983636                                                                    | N-Term(iTRAQ4plex), N8(Deamidated)                                                     | 1346.70574 | 75 | 67  |      | 4.02 | Expt2 |
| VDIETPNLEGLTGPK               | 26  | 61743961                                                                             | N-Term(iTRAQ4plex), K16(iTRAQ4plex)                                                    | 1972.08525 | 75 | 92  |      | 4.81 | Expt2 |
| TAEDGPDLEMLSGOER              | 3   | 161484656;161484658                                                                  | N-Term(iTRAQ4plex)                                                                     | 1891.88152 | 75 | 66  |      | 3.89 | Expt2 |
| SGQPGVPGPAGVR                 | 203 | 111120329                                                                            | N-Term(iTRAQ4plex), Q3(Deamidated)                                                     | 1323.71318 | 75 | 69  | 1.24 | 5.24 | Expt2 |
| AOMQEAHTQEVSDVSDTTPIK         | 3   | 31543942                                                                             | N-Term(iTRAQ4plex), K23(iTRAQ4plex)                                                    | 2845.38352 | 75 | 56  |      | 4.82 | Expt2 |
| TTPSVVAFTADGER                | 5   | 162461907                                                                            | N-Term(iTRAQ4plex)                                                                     | 1594.82219 | 75 | 69  |      | 4.95 | Expt2 |
| TLOGLEIELOSQSMK               | 9   | 6754480;6680606;226823220                                                            | N-Term(iTRAQ4plex), K16(iTRAQ4plex)                                                    | 2106.17412 | 75 | 90  |      | 5.02 | Expt2 |
| TPAQFDADLR                    | 44  | 124517663                                                                            | N-Term(iTRAQ4plex)                                                                     | 1406.70207 | 75 | 62  |      | 3.98 | Expt2 |
| IAIYELLFK                     | 11  | 94369782;13399310                                                                    | N-Term(iTRAQ4plex), K9(iTRAQ4plex)                                                     | 1397.86980 | 75 | 65  |      | 4.38 | Expt2 |
| YMTISGFQIETIDR                | 9   | 6753060                                                                              | N-Term(iTRAQ4plex)                                                                     | 1946.96831 | 75 | 104 |      | 5.02 | Expt2 |
| DNLTLWTSDMQGDGEEQNKALQDVEDENQ | 3   | 226874906                                                                            | N-Term(iTRAQ4plex), K19(iTRAQ4plex)                                                    | 3739.67812 | 75 | 45  |      | 8.16 | Expt2 |
| LGYAGNTEPQFIHPSIAIK           | 3   | 23956222                                                                             | N-Term(iTRAQ4plex), C16(Methylthio), K20(iTRAQ4plex)                                   | 2469.31839 | 75 | 38  |      | 5.86 | Expt2 |
| AGYTDQVIGMDVAASEFYR           | 7   | 149253386                                                                            | N-Term(iTRAQ4plex)                                                                     | 2336.13457 | 75 | 91  | 0.98 | 6.25 | Expt2 |
| LLIVSTSPYSEK                  | 4   | 6755382                                                                              | N-Term(iTRAQ4plex), K12(iTRAQ4plex)                                                    | 1624.94499 | 75 | 102 | 0.99 | 4.30 | Expt2 |
| GLCSGPGAGEESPAATLPR           | 6   | 226442772                                                                            | N-Term(iTRAQ4plex), C3(Methylthio)                                                     | 1959.93999 | 75 | 99  |      | 5.86 | Expt2 |
| SVGMIAGGTITPMLQVIR            | 18  | 19745150                                                                             | N-Term(iTRAQ4plex)                                                                     | 2045.13652 | 75 | 98  | 0.98 | 5.80 | Expt2 |
| LQOTQNOQDEVDIMR               | 9   | 6678553                                                                              | N-Term(iTRAQ4plex)                                                                     | 2060.05644 | 75 | 119 |      | 5.70 | Expt2 |
| IDMYADGTQDLMMMIAPVFK          | 5   | 160298217                                                                            | N-Term(iTRAQ4plex), M12(Oxidation), K21(iTRAQ4plex)                                    | 2665.30552 | 75 | 58  |      | 5.52 | Expt2 |
| LOPQTYDITVLPAMYK              | 23  | 111074529                                                                            | N-Term(iTRAQ4plex), M14(Oxidation), K16(iTRAQ4plex)                                    | 2215.19365 | 75 | 69  |      | 6.67 | Expt2 |
| TLDAEGDVFWR                   | 3   | 19527258                                                                             | N-Term(iTRAQ4plex)                                                                     | 1337.68205 | 75 | 39  |      | 4.35 | Expt2 |
| FQSSMSYGGGFGAGSCQLGGGR        | 9   | 6754480                                                                              | N-Term(iTRAQ4plex), M6(Oxidation), C17(Methylthio)                                     | 2404.02349 | 75 | 137 |      | 8.21 | Expt2 |
| YMCENQATISSK                  | 10  | 163310765                                                                            | N-Term(iTRAQ4plex), C3(Methylthio), K12(iTRAQ4plex)                                    | 1708.79949 | 75 | 74  |      | 5.56 | Expt2 |
| IPDQLVILDMK                   | 14  | 21312062                                                                             | N-Term(iTRAQ4plex), K11(iTRAQ4plex)                                                    | 1572.93132 | 74 | 77  |      | 4.02 | Expt2 |
| LLEPVLGLK                     | 35  | 149254484;149262347                                                                  | N-Term(iTRAQ4plex), K10(iTRAQ4plex)                                                    | 1382.92656 | 74 | 75  |      | 4.29 | Expt2 |
| MLVDDIGDVTINDGATILK           | 3   | 110625624                                                                            | N-Term(iTRAQ4plex), M1(Oxidation), K20(iTRAQ4plex)                                     | 2408.29172 | 74 | 85  |      | 5.01 | Expt2 |
| TVLIMELINNVAK                 | 6   | 31980648                                                                             | N-Term(iTRAQ4plex), M5(Oxidation), K13(iTRAQ4plex)                                     | 1762.04642 | 74 | 67  |      | 4.48 | Expt2 |
| ELNDFISYLQR                   | 20  | 112293264                                                                            | N-Term(iTRAQ4plex)                                                                     | 1541.81206 | 74 | 64  |      | 4.58 | Expt2 |
| DCPOECDPPNFTAMYCDNR           | 28  | 10946680                                                                             | N-Term(iTRAQ4plex), C2(Methylthio), C6(Methylthio), C8(Methylthio),<br>C18(Methylthio) | 2746.95041 | 74 | 70  |      | 5.43 | Expt2 |
| IITLTGPTNAIFK                 | 22  | 6754994                                                                              | N-Term(iTRAQ4plex), K13(iTRAQ4plex)                                                    | 1677.02056 | 74 | 100 | 1.24 | 4.92 | Expt2 |
| DIPNMFMDSAGGLGK               | 4   | 23956396                                                                             | N-Term(iTRAQ4plex), K15(iTRAQ4plex)                                                    | 1840.91635 | 74 | 70  |      | 4.81 | Expt2 |
| TENPGDASDLQGR                 | 15  | 112421039                                                                            | N-Term(iTRAQ4plex)                                                                     | 1503.72124 | 74 | 88  |      | 5.35 | Expt2 |

|                       |     |                                                                      |                                                                                                     |            |    |     |      |      |       |
|-----------------------|-----|----------------------------------------------------------------------|-----------------------------------------------------------------------------------------------------|------------|----|-----|------|------|-------|
| ALIAAQYSGAQVR         | 18  | 82795783;51704904;110625979                                          | N-Term(iTRAQ4plex)                                                                                  | 1491.84075 | 74 | 68  |      | 4.72 | Expt2 |
| GLTEIPPIPSR           | 216 | 6680554                                                              | N-Term(iTRAQ4plex)                                                                                  | 1323.77837 | 74 | 65  |      | 4.20 | Expt2 |
| FGEVDCITK             | 26  | 116256518;116256514;116256516;146260280;148664250;6754222;116256512  | N-Term(iTRAQ4plex), C7(Methylthio), K10(iTRAQ4plex)                                                 | 1444.74346 | 74 | 63  |      | 4.22 | Expt2 |
| VELEDWEGNAR           | 23  | 88196773                                                             | N-Term(iTRAQ4plex)                                                                                  | 1461.71245 | 74 | 59  |      | 4.83 | Expt2 |
| VILPVSDEYVQGLYSVAEASK | 3   | 6679337                                                              | N-Term(iTRAQ4plex), K23(iTRAQ4plex)                                                                 | 2782.52268 | 74 | 80  |      | 5.94 | Expt2 |
| ACSELSGADEAAR         | 21  | 166851828                                                            | N-Term(iTRAQ4plex)                                                                                  | 1519.74907 | 74 | 97  |      | 5.13 | Expt2 |
| GNSIIMLEALER          | 5   | 94401818                                                             | N-Term(iTRAQ4plex)                                                                                  | 1489.81645 | 74 | 49  |      | 4.15 | Expt2 |
| SLDEAIEFINR           | 10  | 38084778;94405733                                                    | N-Term(iTRAQ4plex)                                                                                  | 1450.76628 | 74 | 58  |      | 4.81 | Expt2 |
| GIDPFSLDALAK          | 8   | 6753324                                                              | N-Term(iTRAQ4plex), K12(iTRAQ4plex)                                                                 | 1534.87883 | 74 | 91  |      | 3.90 | Expt2 |
| DMILPEMVGSMGVYNGK     | 6   | 6677799;94377390                                                     | N-Term(iTRAQ4plex), N17(Deamidated), K19(iTRAQ4plex)                                                | 2342.21024 | 74 | 71  |      | 4.55 | Expt2 |
| CPGFYITSPDGTTR        | 7   | 118197277                                                            | N-Term(iTRAQ4plex), C1(Methylthio)                                                                  | 1587.70525 | 74 | 40  |      |      | Expt2 |
| AQYEAMAEQNR           | 136 | 122425580;118130981                                                  | N-Term(iTRAQ4plex)                                                                                  | 1454.68498 | 74 | 76  | 1.06 | 4.84 | Expt2 |
| YVOELPLETDGALR        | 21  | 225543183                                                            | N-Term(iTRAQ4plex)                                                                                  | 1747.94145 | 74 | 61  |      | 4.12 | Expt2 |
| EQISDIDDAVR           | 30  | 6755364                                                              | N-Term(iTRAQ4plex)                                                                                  | 1404.71037 | 74 | 68  |      | 4.36 | Expt2 |
| LPSLAFLYMEK           | 17  | 229608920                                                            | N-Term(iTRAQ4plex), M9(Oxidation), K11(iTRAQ4plex)                                                  | 1615.90691 | 74 | 70  |      | 3.92 | Expt2 |
| DYETATLSDIK           | 20  | 11230802                                                             | N-Term(iTRAQ4plex), K11(iTRAQ4plex)                                                                 | 1543.81352 | 74 | 72  |      | 4.60 | Expt2 |
| TVLIMELINNVAK         | 12  | 31980648                                                             | N-Term(iTRAQ4plex), K13(iTRAQ4plex)                                                                 | 1746.04924 | 74 | 88  |      | 5.11 | Expt2 |
| TPAGLOVLNDYLDK        | 36  | 31980922                                                             | N-Term(iTRAQ4plex), K15(iTRAQ4plex)                                                                 | 1906.05754 | 74 | 117 |      | 5.63 | Expt2 |
| TFITQETITNAETAK       | 6   | 94380203;254553458                                                   | N-Term(iTRAQ4plex), K15(iTRAQ4plex)                                                                 | 1944.01494 | 74 | 92  |      | 5.84 | Expt2 |
| IEEVPELPLVVEVK        | 32  | 30794450                                                             | N-Term(iTRAQ4plex), K14(iTRAQ4plex)                                                                 | 1897.07634 | 74 | 94  | 1.19 | 4.84 | Expt2 |
| YYTLEEIOK             | 3   | 13385268                                                             | N-Term(iTRAQ4plex), K9(iTRAQ4plex)                                                                  | 1474.80388 | 74 | 75  |      | 4.16 | Expt2 |
| LAYINPDLALEEK         | 18  | 14389431                                                             | N-Term(iTRAQ4plex), K13(iTRAQ4plex)                                                                 | 1777.00676 | 74 | 87  |      | 4.69 | Expt2 |
| SYSYDMLSEIK           | 14  | 149260099;6996913                                                    | N-Term(iTRAQ4plex), M7(Oxidation), K12(iTRAQ4plex)                                                  | 1736.87529 | 74 | 107 |      | 3.43 | Expt2 |
| SAMPVDAPLCLR          | 31  | 10946680                                                             | N-Term(iTRAQ4plex), C10(Methylthio)                                                                 | 1462.73381 | 73 | 61  |      | 4.14 | Expt2 |
| EVAEQLAEIYGPDR        | 6   | 6753670                                                              | N-Term(iTRAQ4plex)                                                                                  | 1733.88786 | 73 | 76  |      | 4.77 | Expt2 |
| AIETYQEAADLPDAPTDLVK  | 10  | 125628659                                                            | N-Term(iTRAQ4plex), K20(iTRAQ4plex)                                                                 | 2448.27153 | 73 | 75  |      | 5.63 | Expt2 |
| SGLGSOVGLMPGSGVPGPR   | 45  | 86613790                                                             | N-Term(iTRAQ4plex), M10(Oxidation)                                                                  | 2012.07439 | 73 | 106 |      | 6.21 | Expt2 |
| FIOSPEDLEK            | 4   | 149259801;149260087;169808401;50263046;154350202                     | N-Term(iTRAQ4plex), K10(iTRAQ4plex)                                                                 | 1493.81279 | 73 | 64  |      | 3.65 | Expt2 |
| QNLDPLFEQYINNLK       | 214 | 20911031                                                             | N-Term(iTRAQ4plex), N12(Deamidated)                                                                 | 2022.03996 | 73 | 109 | 1.18 | 6.20 | Expt2 |
| VMSGVSSNGVVDPR        | 4   | 149251440;42741690                                                   | N-Term(iTRAQ4plex), N10(Deamidated)                                                                 | 1749.85735 | 73 | 95  | 0.99 | 6.03 | Expt2 |
| GIFVQSVMPYLVA TK      | 5   | 9789991                                                              | N-Term(iTRAQ4plex), K15(iTRAQ4plex)                                                                 | 1941.11504 | 73 | 90  |      | 5.36 | Expt2 |
| AVNTOALSAGILR         | 8   | 13385878                                                             | N-Term(iTRAQ4plex)                                                                                  | 1514.87712 | 73 | 62  |      | 4.63 | Expt2 |
| NIYSLTPLGQR           | 12  | 6753762                                                              | N-Term(iTRAQ4plex)                                                                                  | 1518.87688 | 73 | 64  |      | 4.35 | Expt2 |
| NLPYSEIIVEMYK         | 10  | 114326446                                                            | N-Term(iTRAQ4plex), K14(iTRAQ4plex)                                                                 | 2016.06267 | 73 | 99  |      | 5.80 | Expt2 |
| FEELCSDLFR            | 26  | 124339829;124339826                                                  | N-Term(iTRAQ4plex), C5(Methylthio)                                                                  | 1448.67217 | 73 | 57  |      | 4.21 | Expt2 |
| GDEGPPGPEGLR          | 26  | 6753484                                                              | N-Term(iTRAQ4plex)                                                                                  | 1324.66179 | 73 | 66  |      | 4.22 | Expt2 |
| GDVPSVGLGPNIDLOGPEK   | 7   | 61743961                                                             | N-Term(iTRAQ4plex), K21(iTRAQ4plex)                                                                 | 2366.25510 | 73 | 84  | 1.09 | 5.91 | Expt2 |
| EPDAPDSAGAESGPR       | 3   | 169646258                                                            | N-Term(iTRAQ4plex)                                                                                  | 1753.81437 | 73 | 88  |      | 5.37 | Expt2 |
| ASGHDTLFDQR           | 12  | 149266012;214010170                                                  | N-Term(iTRAQ4plex)                                                                                  | 1479.79753 | 73 | 77  |      | 4.81 | Expt2 |
| VEFMDDTSR             | 12  | 149255324;149248869;149251798;149253028;82895184;149254364;149257368 | N-Term(iTRAQ4plex)                                                                                  | 1243.57488 | 73 | 44  |      | 3.48 | Expt2 |
| VLLEEGLAAGAGGQPEPSR   | 6   | 124486923                                                            | N-Term(iTRAQ4plex)                                                                                  | 2381.21610 | 73 | 81  |      | 6.39 | Expt2 |
| QVPNESFFNFFSPLK       | 6   | 6679012                                                              | N-Term(iTRAQ4plex), K15(iTRAQ4plex)                                                                 | 2089.10117 | 73 | 47  | 0.99 | 5.35 | Expt2 |
| TAAALDOFYEK           | 11  | 8394362                                                              | N-Term(iTRAQ4plex), K12(iTRAQ4plex)                                                                 | 1657.90923 | 73 | 93  | 1.21 | 4.90 | Expt2 |
| VEILAPPNGSVPGDR       | 9   | 126012517                                                            | N-Term(iTRAQ4plex), N8(Deamidated)                                                                  | 1665.89275 | 73 | 77  | 1.47 | 3.77 | Expt2 |
| EAEYFELPELVR          | 11  | 123701966                                                            | N-Term(iTRAQ4plex)                                                                                  | 1638.85564 | 73 | 75  |      | 4.71 | Expt2 |
| LIVALMYPYSYEA K       | 22  | 149265291;22165408                                                   | N-Term(iTRAQ4plex), K15(iTRAQ4plex)                                                                 | 2046.11870 | 73 | 75  |      | 4.13 | Expt2 |
| ETGCCDCEK             | 15  | 22203747                                                             | N-Term(iTRAQ4plex), C3(Methylthio), C5(Methylthio), C6(Methylthio), C8(Methylthio), K10(iTRAQ4plex) | 1562.48674 | 73 | 74  |      | 3.93 | Expt2 |
| ILVNAAYFVGK           | 10  | 6678103                                                              | N-Term(iTRAQ4plex), K12(iTRAQ4plex)                                                                 | 1581.96880 | 73 | 97  |      | 4.89 | Expt2 |
| SLAELGDCNDLEQAEK      | 6   | 21704174                                                             | N-Term(iTRAQ4plex), C8(Methylthio), K17(iTRAQ4plex)                                                 | 2198.02530 | 73 | 68  |      | 5.16 | Expt2 |
| LVAGEMQNEPDQGGQR      | 3   | 61888838                                                             | N-Term(iTRAQ4plex)                                                                                  | 1929.92246 | 73 | 48  |      | 4.85 | Expt2 |
| TLLPGSQITFDLDDVR      | 10  | 115647999                                                            | N-Term(iTRAQ4plex)                                                                                  | 2035.08586 | 73 | 83  | 0.97 | 3.86 | Expt2 |
| AADAEAVASLNR          | 11  | 40254525                                                             | N-Term(iTRAQ4plex)                                                                                  | 1460.74639 | 73 | 55  |      | 3.92 | Expt2 |



|                         |    |                                                  |                                                                     |            |    |     |      |      |       |
|-------------------------|----|--------------------------------------------------|---------------------------------------------------------------------|------------|----|-----|------|------|-------|
| YGALALQEIFDGIQPK        | 3  | 12963737                                         | N-Term(iTRAQ4plex), K16(iTRAQ4plex)                                 | 2051.14450 | 73 | 71  |      | 4.91 | Expt2 |
| YDPPLEDGAMPSAR          | 10 | 6753262:83649737                                 | N-Term(iTRAQ4plex)                                                  | 1662.79363 | 73 | 64  |      |      | Expt2 |
| DMLEASILDTVLQK          | 11 | 126723461                                        | N-Term(iTRAQ4plex), K14(iTRAQ4plex)                                 | 1856.99553 | 73 | 95  | 1.49 | 5.15 | Expt2 |
| YVASYLLAALGGNSSPSAK     | 10 | 149263166:83745120                               | N-Term(iTRAQ4plex), K19(iTRAQ4plex)                                 | 2157.18193 | 73 | 99  | 0.97 | 6.47 | Expt2 |
| SGLVSFYQDWR             | 23 | 88196773                                         | N-Term(iTRAQ4plex)                                                  | 1501.75664 | 73 | 64  |      | 4.50 | Expt2 |
| ACLNLVNTNGR             | 37 | 111185907                                        | N-Term(iTRAQ4plex), N10(Deamidated)                                 | 1473.77910 | 73 | 72  |      | 4.72 | Expt2 |
| EFNGLGDCLTK             | 6  | 148747424                                        | N-Term(iTRAQ4plex), N3(Deamidated), C8(Methylthio), K11(iTRAQ4plex) | 1531.73467 | 73 | 64  |      | 4.44 | Expt2 |
| NLVVDEDETATSLR          | 6  | 226423922                                        | N-Term(iTRAQ4plex)                                                  | 1576.82695 | 73 | 55  |      | 3.86 | Expt2 |
| LVQSPNSYFMDVK           | 7  | 13385958:149260404:149261975                     | N-Term(iTRAQ4plex), K13(iTRAQ4plex)                                 | 1815.96257 | 73 | 94  |      | 4.31 | Expt2 |
| TAMNVNEIFMAIAK          | 8  | 113866024                                        | N-Term(iTRAQ4plex), K14(iTRAQ4plex)                                 | 1840.99773 | 73 | 89  |      | 4.64 | Expt2 |
| SLADLTAVDVPTR           | 5  | 82934613:149262115:58037117                      | N-Term(iTRAQ4plex)                                                  | 1501.83525 | 73 | 77  |      | 4.68 | Expt2 |
| AFLSVMASPQSLCGLR        | 50 | 148277039                                        | N-Term(iTRAQ4plex), M6(Oxidation), C13(Methylthio)                  | 1885.95049 | 73 | 71  |      | 5.03 | Expt2 |
| VALIGSPVLTYSR           | 5  | 229892318                                        | N-Term(iTRAQ4plex)                                                  | 1547.89324 | 73 | 59  |      | 4.74 | Expt2 |
| QEPSDSPMFIINR           | 7  | 169234958:32129201                               | N-Term(iTRAQ4plex)                                                  | 1677.84209 | 73 | 69  |      | 4.50 | Expt2 |
| OGAIVAVTGDGVNDSPALK     | 14 | 21450277:30409956:21450321                       | N-Term(iTRAQ4plex), K19(iTRAQ4plex)                                 | 2100.15854 | 73 | 88  | 1.37 | 5.65 | Expt2 |
| LLSLVDDEAFIR            | 9  | 24418919                                         | N-Term(iTRAQ4plex)                                                  | 1534.86528 | 73 | 77  |      | 4.35 | Expt2 |
| ELEEOLGPVAEETR          | 11 | 163644329                                        | N-Term(iTRAQ4plex)                                                  | 1743.89446 | 73 | 78  |      | 5.06 | Expt2 |
| CEMEAQNOEYNMLLDIK       | 13 | 226823220                                        | N-Term(iTRAQ4plex), C1(Methylthio), K17(iTRAQ4plex)                 | 2406.11528 | 73 | 91  | 0.99 | 6.41 | Expt2 |
| SEAVVEVVFSGSR           | 6  | 77404392                                         | N-Term(iTRAQ4plex)                                                  | 1573.79924 | 72 | 56  |      | 4.55 | Expt2 |
| FPQLDDTSFANSR           | 10 | 93102409                                         | N-Term(iTRAQ4plex)                                                  | 1641.80156 | 72 | 71  |      | 4.00 | Expt2 |
| FOMPDQGMTSADDFQGTK      | 4  | 40254595                                         | N-Term(iTRAQ4plex), K19(iTRAQ4plex)                                 | 2439.12320 | 72 | 52  | 1.59 | 5.63 | Expt2 |
| GDYQTSPLLETR            | 17 | 226246550                                        | N-Term(iTRAQ4plex)                                                  | 1523.78411 | 72 | 70  |      | 4.34 | Expt2 |
| TIOFVDWCPTGFK           | 23 | 6755901:6678465:8394493:6678469                  | N-Term(iTRAQ4plex), C8(Methylthio), K13(iTRAQ4plex)                 | 1875.94267 | 72 | 68  |      | 4.66 | Expt2 |
| SAGVSVPGMPGSGPR         | 74 | 34328108                                         | N-Term(iTRAQ4plex)                                                  | 1596.83306 | 72 | 83  |      | 4.79 | Expt2 |
| YQLDPTASISAK            | 5  | 6755965                                          | N-Term(iTRAQ4plex), K12(iTRAQ4plex)                                 | 1581.87737 | 72 | 92  |      | 4.26 | Expt2 |
| VLGATLSPELIQK           | 10 | 68226731                                         | N-Term(iTRAQ4plex), K13(iTRAQ4plex)                                 | 1657.02068 | 72 | 88  | 1.13 | 4.88 | Expt2 |
| VVIEDGVGDAVLTNR         | 9  | 126518317                                        | N-Term(iTRAQ4plex)                                                  | 1586.89177 | 72 | 64  | 0.99 | 4.75 | Expt2 |
| DDPVTNLNNAFEVAEK        | 17 | 11230802                                         | N-Term(iTRAQ4plex), K16(iTRAQ4plex)                                 | 2064.05229 | 72 | 110 |      | 5.89 | Expt2 |
| INNVEIFDLVR             | 14 | 21704066:149261508                               | N-Term(iTRAQ4plex)                                                  | 1638.89946 | 72 | 75  |      | 5.13 | Expt2 |
| FVDGLMHSGDPVNYVDTAVR    | 6  | 6755372                                          | N-Term(iTRAQ4plex), M6(Oxidation)                                   | 2628.29331 | 72 | 55  |      | 6.29 | Expt2 |
| SLYSSPGGAYVTR           | 14 | 31982755                                         | N-Term(iTRAQ4plex)                                                  | 1588.81108 | 72 | 76  |      | 4.92 | Expt2 |
| FVTVQITISGTGALR         | 26 | 6754036                                          | N-Term(iTRAQ4plex)                                                  | 1593.91081 | 72 | 63  |      | 4.36 | Expt2 |
| NOEQLAELAEFTAK          | 7  | 157277948                                        | N-Term(iTRAQ4plex), K15(iTRAQ4plex)                                 | 1951.04422 | 72 | 66  |      | 5.82 | Expt2 |
| SEGTGCCPVSVR            | 10 | 6678329                                          | N-Term(iTRAQ4plex), C6(Methylthio), C7(Methylthio)                  | 1593.66301 | 72 | 75  |      | 5.06 | Expt2 |
| NSTFSELFK               | 17 | 6678359                                          | N-Term(iTRAQ4plex), K9(iTRAQ4plex)                                  | 1360.74260 | 72 | 77  |      | 4.16 | Expt2 |
| LSVEEVAAGVVGGEIOEK      | 7  | 37537522                                         | N-Term(iTRAQ4plex), K19(iTRAQ4plex)                                 | 2173.20298 | 72 | 63  | 1.07 | 5.34 | Expt2 |
| GEFFNELVGQQR            | 9  | 45504394                                         | N-Term(iTRAQ4plex)                                                  | 1567.79997 | 72 | 62  |      | 4.92 | Expt2 |
| GIQVSNNGPCLGSR          | 6  | 31560705                                         | N-Term(iTRAQ4plex), N7(Deamidated), C10(Methylthio)                 | 1592.76592 | 72 | 89  |      | 4.83 | Expt2 |
| VOIALAQYSGDPR           | 73 | 111074529                                        | N-Term(iTRAQ4plex)                                                  | 1561.84575 | 72 | 67  | 0.98 | 4.27 | Expt2 |
| DIVEVLFTQPNVELNQONK     | 8  | 22267440                                         | N-Term(iTRAQ4plex), K19(iTRAQ4plex)                                 | 2516.37009 | 72 | 62  |      | 5.35 | Expt2 |
| SGEEDFSLASQFSDCCSAK     | 6  | 85702071:12963653                                | N-Term(iTRAQ4plex), C16(Methylthio), K20(iTRAQ4plex)                | 2458.07370 | 72 | 62  |      | 5.27 | Expt2 |
| YFGFTGDSSGSPTELLLOALEEK | 5  | 111185907                                        | N-Term(iTRAQ4plex), K24(iTRAQ4plex)                                 | 2816.41623 | 72 | 73  |      | 6.35 | Expt2 |
| IVSGAAETDQEYFQWVR       | 11 | 109627652                                        | N-Term(iTRAQ4plex)                                                  | 2276.13213 | 72 | 107 |      | 5.02 | Expt2 |
| YNNLGAETVLTQMR          | 8  | 149270322:124487099                              | N-Term(iTRAQ4plex)                                                  | 1738.93437 | 72 | 76  | 1.03 | 5.60 | Expt2 |
| GLDGFQGPSGPR            | 11 | 226437587                                        | N-Term(iTRAQ4plex)                                                  | 1331.68364 | 72 | 77  |      | 3.87 | Expt2 |
| SLTSEDSAVYYCAR          | 3  | 83008262:149274201:149274205                     | N-Term(iTRAQ4plex), C12(Methylthio)                                 | 1754.78630 | 72 | 92  |      | 5.31 | Expt2 |
| TIPAWATLSASQALR         | 5  | 171543869:171543871                              | N-Term(iTRAQ4plex)                                                  | 1729.97673 | 72 | 91  |      | 3.44 | Expt2 |
| QLLVEEVGPLSGK           | 9  | 124487435                                        | N-Term(iTRAQ4plex), K13(iTRAQ4plex)                                 | 1743.99285 | 72 | 89  |      | 4.45 | Expt2 |
| ADVDSLPEVEGGVK          | 6  | 61743961                                         | N-Term(iTRAQ4plex), K15(iTRAQ4plex)                                 | 1773.95354 | 72 | 89  |      | 4.37 | Expt2 |
| GLMSNGMSQLIGIK          | 15 | 9790161                                          | N-Term(iTRAQ4plex), N5(Deamidated), K14(iTRAQ4plex)                 | 1737.95659 | 72 | 86  |      | 5.08 | Expt2 |
| LAAAVSNFYDLYR           | 17 | 117606335                                        | N-Term(iTRAQ4plex)                                                  | 1703.89226 | 72 | 86  |      | 5.64 | Expt2 |
| FYGDNPQTSPLNGR          | 8  | 82997826:38084778:94405733:830195<br>64:34328288 | N-Term(iTRAQ4plex)                                                  | 1709.84575 | 72 | 85  |      | 4.53 | Expt2 |
| VAAAESMPLLECAR          | 5  | 29789199                                         | N-Term(iTRAQ4plex), C13(Methylthio)                                 | 1763.90190 | 72 | 84  |      | 4.97 | Expt2 |
| QLLVEAIDVPVGTATLGR      | 8  | 110735428:110735426                              | N-Term(iTRAQ4plex)                                                  | 1996.15738 | 72 | 82  |      | 4.73 | Expt2 |

|                       |    |                                                                                                                  |                                                     |            |    |     |      |      |       |
|-----------------------|----|------------------------------------------------------------------------------------------------------------------|-----------------------------------------------------|------------|----|-----|------|------|-------|
| WGTEAOQFIYILGNR       | 14 | 31981302;158966670                                                                                               | N-Term(iTRAQ4plex)                                  | 1926.99028 | 72 | 82  |      | 5.75 | Expt2 |
| AGDTAELFFEDVR         | 8  | 31982520                                                                                                         | N-Term(iTRAQ4plex)                                  | 1684.83257 | 72 | 80  |      | 4.33 | Expt2 |
| VPPAINQFTQALDR        | 24 | 149250878;82801057;82904025;149257810;149258982;149260113;94386298;82930638;82953577;63663484;82956648;149268884 | N-Term(iTRAQ4plex)                                  | 1713.94451 | 72 | 77  |      | 4.50 | Expt2 |
| NAGTCLSPAVIVGLLR      | 9  | 52353955                                                                                                         | N-Term(iTRAQ4plex), C5(Methylthio)                  | 1773.98870 | 72 | 72  |      | 5.67 | Expt2 |
| EEEAQPALALSLIER       | 7  | 9790167                                                                                                          | N-Term(iTRAQ4plex)                                  | 1741.95183 | 72 | 70  |      | 4.32 | Expt2 |
| WSTLVEDYGVVELR        | 6  | 13385384                                                                                                         | N-Term(iTRAQ4plex)                                  | 1710.88738 | 72 | 66  |      | 3.96 | Expt2 |
| MIQALELDPNLYR         | 12 | 29336026                                                                                                         | N-Term(iTRAQ4plex)                                  | 1719.92461 | 72 | 55  |      | 4.53 | Expt2 |
| LDGNPLTQSSLPDPMYECLR  | 35 | 160333372                                                                                                        | N-Term(iTRAQ4plex), M15(Oxidation), C18(Methylthio) | 2455.14458 | 72 | 95  |      | 5.01 | Expt2 |
| EMNDAAMFYTNR          | 12 | 157951604                                                                                                        | N-Term(iTRAQ4plex)                                  | 1606.71257 | 72 | 69  |      | 5.05 | Expt2 |
| VEGVEQQLVPAER         | 9  | 113865981                                                                                                        | N-Term(iTRAQ4plex)                                  | 1567.89275 | 72 | 62  |      | 5.41 | Expt2 |
| INVTGIPDELSEQTR       | 3  | 33469125                                                                                                         | N-Term(iTRAQ4plex)                                  | 1944.99980 | 72 | 90  |      | 4.42 | Expt2 |
| ATVLNLYQTCIR          | 75 | 148277039                                                                                                        | N-Term(iTRAQ4plex), C10(Methylthio)                 | 1584.84062 | 72 | 62  |      | 5.44 | Expt2 |
| FAPPEAPEWSSGVR        | 11 | 27370126;37718991;120474987;21704206;268839831                                                                   | N-Term(iTRAQ4plex)                                  | 1683.86687 | 72 | 54  |      | 3.84 | Expt2 |
| SDFDMVDYLNELR         | 5  | 88014720                                                                                                         | N-Term(iTRAQ4plex)                                  | 1760.83000 | 72 | 75  |      | 4.47 | Expt2 |
| LVPASQCGSLIGK         | 6  | 157042772;157041229;157057549;171906586                                                                          | N-Term(iTRAQ4plex), C8(Methylthio), K14(iTRAQ4plex) | 1705.96086 | 72 | 97  |      | 4.43 | Expt2 |
| NCIVLIDSTPYR          | 14 | 149257598;149250154;82922494;94387984;149264053                                                                  | N-Term(iTRAQ4plex), C2(Methylthio)                  | 1583.80742 | 72 | 59  |      | 4.32 | Expt2 |
| YFILPDSLPLDLLVDVEPK   | 3  | 6678055;149250230                                                                                                | N-Term(iTRAQ4plex), K20(iTRAQ4plex)                 | 2575.46152 | 72 | 49  |      | 4.76 | Expt2 |
| YGIADVSIVYDQOSR       | 21 | 6677975                                                                                                          | N-Term(iTRAQ4plex)                                  | 1955.00029 | 72 | 109 |      | 5.56 | Expt2 |
| WVNDVEDSYGQOWTYEQR    | 7  | 21450277                                                                                                         | N-Term(iTRAQ4plex)                                  | 2447.10600 | 72 | 88  |      | 6.63 | Expt2 |
| LFYALPPTVVEAVTK       | 13 | 6996917                                                                                                          | N-Term(iTRAQ4plex), K16(iTRAQ4plex)                 | 2113.22348 | 72 | 68  |      | 4.88 | Expt2 |
| EEAQAEIEQYR           | 8  | 149249305;15617197                                                                                               | N-Term(iTRAQ4plex)                                  | 1509.73259 | 72 | 61  |      | 4.76 | Expt2 |
| GQIHYTWGGANATR        | 16 | 226246550;226246552                                                                                              | N-Term(iTRAQ4plex)                                  | 1722.90190 | 71 | 66  |      | 4.37 | Expt2 |
| DNPGVYTCLEEAR         | 20 | 6678483                                                                                                          | N-Term(iTRAQ4plex), C8(Methylthio)                  | 1578.73784 | 71 | 79  |      | 4.91 | Expt2 |
| IEDLSQAQALAAEK        | 10 | 41350312;163965357                                                                                               | N-Term(iTRAQ4plex), K15(iTRAQ4plex)                 | 1903.03862 | 71 | 115 | 1.41 | 6.61 | Expt2 |
| TCLLNETGDEPFQYKN      | 3  | 149269782;31982332                                                                                               | N-Term(iTRAQ4plex), C2(Methylthio), K15(iTRAQ4plex) | 2206.04129 | 71 | 50  |      | 4.82 | Expt2 |
| SLNSEMDNILANLR        | 8  | 33859811                                                                                                         | N-Term(iTRAQ4plex)                                  | 1733.89922 | 71 | 85  |      | 5.53 | Expt2 |
| SFLGGDSSPMVDYLTWPWFQR | 9  | 6754090                                                                                                          | N-Term(iTRAQ4plex), M10(Oxidation)                  | 2649.26250 | 71 | 107 |      | 7.48 | Expt2 |
| LFYINPSSGEFLGR        | 25 | 6680744                                                                                                          | N-Term(iTRAQ4plex)                                  | 1743.92522 | 71 | 63  |      | 4.49 | Expt2 |
| GELVPLDTVLDMLR        | 5  | 10946936                                                                                                         | N-Term(iTRAQ4plex)                                  | 1714.95745 | 71 | 76  |      | 3.78 | Expt2 |
| DTFGEMSDGDMQEQLR      | 6  | 58037101                                                                                                         | N-Term(iTRAQ4plex)                                  | 2002.85845 | 71 | 113 |      | 4.55 | Expt2 |
| ASIPFVVGSNQLIEAK      | 8  | 6754816;228480253                                                                                                | N-Term(iTRAQ4plex), K17(iTRAQ4plex)                 | 2048.16153 | 71 | 67  |      | 5.14 | Expt2 |
| EIQEEEDLAEIVQLVGK     | 5  | 31560731                                                                                                         | N-Term(iTRAQ4plex), K18(iTRAQ4plex)                 | 2343.29277 | 71 | 116 |      | 6.15 | Expt2 |
| MINLSVPDTIDER         | 6  | 21704120;262050551;31543113                                                                                      | N-Term(iTRAQ4plex)                                  | 1646.85686 | 71 | 62  |      | 4.23 | Expt2 |
| ELEDVTSAESMNR         | 13 | 29336026                                                                                                         | N-Term(iTRAQ4plex)                                  | 1753.80193 | 71 | 59  |      | 4.90 | Expt2 |
| VFLDPNTLSDDGTVALR     | 11 | 6755152                                                                                                          | N-Term(iTRAQ4plex)                                  | 1977.04021 | 71 | 92  |      | 4.45 | Expt2 |
| SPASDTYIVFGEAK        | 8  | 41350312;163965357                                                                                               | N-Term(iTRAQ4plex), K14(iTRAQ4plex)                 | 1772.93559 | 71 | 113 |      | 5.46 | Expt2 |
| ELVFYLLMMAK           | 7  | 148277039                                                                                                        | N-Term(iTRAQ4plex), K11(iTRAQ4plex)                 | 1695.91301 | 71 | 71  | 0.98 | 5.13 | Expt2 |
| AVLVDLEPGTMDSVR       | 22 | 31981939;22165384                                                                                                | N-Term(iTRAQ4plex), M11(Oxidation)                  | 1761.92119 | 71 | 72  |      | 4.07 | Expt2 |
| TGLLSGLDIMEVNPTLTK    | 3  | 7106255                                                                                                          | N-Term(iTRAQ4plex), K18(iTRAQ4plex)                 | 2146.19895 | 71 | 62  |      | 5.08 | Expt2 |
| MQOQLDEYQELLDIK       | 18 | 9506843;162287370;161760667                                                                                      | N-Term(iTRAQ4plex), K15(iTRAQ4plex)                 | 2182.13779 | 71 | 65  |      | 5.72 | Expt2 |
| TNLIIVNYPQNMTEELR     | 11 | 31542602                                                                                                         | N-Term(iTRAQ4plex)                                  | 2320.21524 | 71 | 68  |      | 5.34 | Expt2 |
| FYPDPQAQLTEDITR       | 8  | 190684669;190684673;7305029;190881478;54873604                                                                   | N-Term(iTRAQ4plex)                                  | 1906.97014 | 71 | 60  |      | 3.74 | Expt2 |
| DVNAAIATIK            | 15 | 6755901;34740335;6678465;51765047;82930560;6678469                                                               | N-Term(iTRAQ4plex), K10(iTRAQ4plex)                 | 1303.77861 | 71 | 81  |      | 4.95 | Expt2 |
| VLVDINNPEPLIQTAKE     | 15 | 6671702                                                                                                          | N-Term(iTRAQ4plex), K16(iTRAQ4plex)                 | 2052.19956 | 71 | 75  |      | 4.88 | Expt2 |
| NQOEGVCPGEGSIDNSPVK   | 13 | 20330802                                                                                                         | N-Term(iTRAQ4plex), C7(Methylthio), K18(iTRAQ4plex) | 2235.06882 | 71 | 67  | 1.22 | 5.48 | Expt2 |
| FGEGMQLAWNR           | 17 | 82950147;82950149;149264086                                                                                      | N-Term(iTRAQ4plex)                                  | 1452.71880 | 71 | 61  |      | 4.58 | Expt2 |
| EVQGFSSFTSGYFK        | 10 | 28916693                                                                                                         | N-Term(iTRAQ4plex), K15(iTRAQ4plex)                 | 2000.99247 | 71 | 72  |      | 4.00 | Expt2 |
| LLMMAGIDDCYSAR        | 5  | 149253083;82898647;149255335;82902507;94383782;94383784;149259263;63594466;149265803;94404463                    | N-Term(iTRAQ4plex), C10(Methylthio)                 | 1849.84880 | 71 | 102 | 1.16 | 4.47 | Expt2 |
| LGTDESCFNMLIATR       | 6  | 160707958                                                                                                        | N-Term(iTRAQ4plex), C7(Methylthio)                  | 1860.88420 | 71 | 84  |      | 5.65 | Expt2 |
| LMTDTINEPILLCR        | 8  | 219276601;219275596                                                                                              | N-Term(iTRAQ4plex), C13(Methylthio)                 | 1821.94426 | 71 | 81  |      | 4.52 | Expt2 |

|                        |    |                                                                   |                                                      |            |    |     |      |       |       |
|------------------------|----|-------------------------------------------------------------------|------------------------------------------------------|------------|----|-----|------|-------|-------|
| LPAIEPSDOGOYLGR        | 13 | 149253040:183979966                                               | N-Term(iTRAQ4plex), C14(Methylthio)                  | 1879.91753 | 71 | 76  |      | 4.12  | Expt2 |
| SLEQNVLPAAALLSR        | 4  | 10242373                                                          | N-Term(iTRAQ4plex)                                   | 1783.02190 | 71 | 76  |      | 5.07  | Expt2 |
| FGFPEGSVELYAEK         | 20 | 6755372                                                           | N-Term(iTRAQ4plex), K14(iTRAQ4plex)                  | 1860.96904 | 71 | 81  |      | 4.82  | Expt2 |
| SLYYYIQODTK            | 30 | 6996913                                                           | N-Term(iTRAQ4plex), K11(iTRAQ4plex)                  | 1709.90508 | 71 | 75  | 1.35 | 4.83  | Expt2 |
| GPSFNVASPESDFGVSLK     | 9  | 61743961                                                          | N-Term(iTRAQ4plex), K18(iTRAQ4plex)                  | 2126.10550 | 71 | 61  |      | 4.93  | Expt2 |
| EIVLADVIDNSWR          | 8  | 13385434                                                          | N-Term(iTRAQ4plex)                                   | 1788.93144 | 71 | 66  |      | 4.66  | Expt2 |
| YIQVVYLHNNNISAVGQNDFCR | 5  | 6681143                                                           | N-Term(iTRAQ4plex), C21(Methylthio)                  | 2757.34439 | 71 | 55  |      | 5.60  | Expt2 |
| TPMGIIIDALEQOEDNINK    | 3  | 14149750                                                          | N-Term(iTRAQ4plex), K19(iTRAQ4plex)                  | 2430.28012 | 71 | 82  |      | 5.61  | Expt2 |
| SYIEQLTPTNTNR          | 4  | 149269540:29568084                                                | N-Term(iTRAQ4plex)                                   | 1843.93022 | 70 | 67  | 1.20 | 4.40  | Expt2 |
| SAGWVVIPIGLLCK         | 12 | 20330802                                                          | N-Term(iTRAQ4plex), C13(Methylthio), K14(iTRAQ4plex) | 1838.03519 | 70 | 61  |      | 4.63  | Expt2 |
| TLGDVVPVADPTVNPVTVTR   | 7  | 33563236                                                          | N-Term(iTRAQ4plex)                                   | 2307.31272 | 70 | 64  |      | 5.18  | Expt2 |
| YVLGNLTPGINOGPQIDK     | 6  | 85861182                                                          | N-Term(iTRAQ4plex), K19(iTRAQ4plex)                  | 2312.28861 | 70 | 81  |      | 6.20  | Expt2 |
| FSSCIDMGQELLAR         | 3  | 55926127                                                          | N-Term(iTRAQ4plex), C4(Methylthio)                   | 1759.83342 | 70 | 47  |      | 4.35  | Expt2 |
| AYTEVAAEQQLR           | 7  | 111185907                                                         | N-Term(iTRAQ4plex)                                   | 1721.89202 | 70 | 68  |      | 5.22  | Expt2 |
| GGYFDFEIGIR            | 9  | 227330582:6996917                                                 | N-Term(iTRAQ4plex)                                   | 1417.72588 | 70 | 56  |      | 4.85  | Expt2 |
| LFIGGLNVQTSSEGLR       | 14 | 226443091                                                         | N-Term(iTRAQ4plex)                                   | 1835.02104 | 70 | 95  |      | 4.38  | Expt2 |
| VGWVQYSSDTR            | 33 | 111074529                                                         | N-Term(iTRAQ4plex)                                   | 1354.71013 | 70 | 60  |      | 4.50  | Expt2 |
| IMEGPAFNFLDAPAVR       | 11 | 18152793                                                          | N-Term(iTRAQ4plex)                                   | 1891.99175 | 70 | 91  |      | 4.63  | Expt2 |
| DFDSLAAQPSFFDR         | 23 | 22203747                                                          | N-Term(iTRAQ4plex)                                   | 1688.80742 | 70 | 60  | 0.99 | 4.97  | Expt2 |
| ALSAGNIDDAQCYSSEAIK    | 13 | 14389431                                                          | N-Term(iTRAQ4plex), C13(Methylthio), K19(iTRAQ4plex) | 2316.14433 | 70 | 95  |      | 6.08  | Expt2 |
| STESLOANVQR            | 15 | 149251177:149252074:149258092:94397192                            | N-Term(iTRAQ4plex)                                   | 1376.72710 | 70 | 68  |      | 4.86  | Expt2 |
| EGDLITLLVPEAR          | 10 | 83649713:83642836:262231776                                       | N-Term(iTRAQ4plex)                                   | 1569.90251 | 70 | 90  |      | 4.30  | Expt2 |
| TEGLSLVNOAMAVIK        | 4  | 13385624                                                          | N-Term(iTRAQ4plex), K15(iTRAQ4plex)                  | 1862.07602 | 70 | 43  |      | 4.35  | Expt2 |
| AVPLALALISVSNPR        | 4  | 19882201                                                          | N-Term(iTRAQ4plex)                                   | 1665.02250 | 70 | 65  |      | 5.14  | Expt2 |
| CSGIFDESTPVQTR         | 3  | 39573709                                                          | N-Term(iTRAQ4plex)                                   | 1637.82585 | 70 | 68  |      | 4.98  | Expt2 |
| QITLNDLPVGR            | 86 | 7948999:6754976                                                   | N-Term(iTRAQ4plex)                                   | 1369.79436 | 70 | 57  |      | 4.39  | Expt2 |
| NDSPCGTIIIGPILASR      | 3  | 161016822:161016820                                               | N-Term(iTRAQ4plex), C5(Methylthio)                   | 1791.89287 | 70 | 72  |      | 4.30  | Expt2 |
| AQYYLPDGSITIEIGPSR     | 13 | 8392847                                                           | N-Term(iTRAQ4plex)                                   | 2011.02397 | 70 | 89  |      | 4.02  | Expt2 |
| EIEELSOQAALSOEGK       | 6  | 117938332:117938334                                               | N-Term(iTRAQ4plex), K17(iTRAQ4plex)                  | 2176.13449 | 70 | 76  |      | 5.43  | Expt2 |
| NLPLPPPPPPR            | 20 | 13384620                                                          | N-Term(iTRAQ4plex)                                   | 1338.80107 | 70 | 54  |      | 3.69  | Expt2 |
| FTITPPSAQVVGVLK        | 5  | 149234244:161086971                                               | N-Term(iTRAQ4plex), K15(iTRAQ4plex)                  | 1845.11808 | 70 | 53  |      | 5.41  | Expt2 |
| GEFQILDALDK            | 11 | 31982861                                                          | N-Term(iTRAQ4plex), K12(iTRAQ4plex)                  | 1649.94377 | 70 | 76  |      | 4.06  | Expt2 |
| IIGTQELNQR             | 7  | 55926127                                                          | N-Term(iTRAQ4plex)                                   | 1443.80608 | 70 | 64  |      | 4.73  | Expt2 |
| LSGCEAMDSEALVR         | 6  | 37718991:268839831                                                | N-Term(iTRAQ4plex), C4(Methylthio)                   | 1670.76848 | 70 | 61  |      | 4.68  | Expt2 |
| LSGCEAMDSQALVR         | 6  | 21704206                                                          | N-Term(iTRAQ4plex), C4(Methylthio), Q10(Deamidated)  | 1670.76848 | 70 | 61  |      | 4.68  | Expt2 |
| TIAMDGTEGLVR           | 21 | 31980648                                                          | N-Term(iTRAQ4plex)                                   | 1406.74455 | 70 | 64  |      | 4.50  | Expt2 |
| FEDENFILK              | 22 | 149257773:149268842:149269448:6679439                             | N-Term(iTRAQ4plex), K9(iTRAQ4plex)                   | 1442.77776 | 70 | 61  |      | 3.82  | Expt2 |
| SEODQAEENGEDSAVLMER    | 4  | 149258001:22203755                                                | N-Term(iTRAQ4plex)                                   | 2280.99761 | 70 | 101 |      | 5.58  | Expt2 |
| IPGGIIEDSCVLR          | 8  | 6753320                                                           | N-Term(iTRAQ4plex), C10(Methylthio)                  | 1561.82146 | 70 | 42  |      | Expt2 |       |
| TLAQDYGVLK             | 10 | 94400195:149267887:6754976                                        | N-Term(iTRAQ4plex), K10(iTRAQ4plex)                  | 1395.81658 | 70 | 78  |      | 4.43  | Expt2 |
| ESALSPGEDVQR           | 11 | 125490382                                                         | N-Term(iTRAQ4plex)                                   | 1431.72161 | 70 | 69  |      | 4.22  | Expt2 |
| LSLDVEALR              | 19 | 82950147:149264086                                                | N-Term(iTRAQ4plex)                                   | 1159.68254 | 70 | 55  |      | 3.92  | Expt2 |
| EVYELDTPGR             | 6  | 13385434                                                          | N-Term(iTRAQ4plex)                                   | 1435.75517 | 70 | 64  |      | 4.38  | Expt2 |
| DNOSGSLFIGR            | 14 | 161353502                                                         | N-Term(iTRAQ4plex)                                   | 1450.77825 | 70 | 60  |      | 5.42  | Expt2 |
| LLADPTGAFGK            | 9  | 6755114                                                           | N-Term(iTRAQ4plex), K11(iTRAQ4plex)                  | 1377.79631 | 70 | 79  |      | 4.24  | Expt2 |
| LOELEGPSVSIMOK         | 5  | 226423922                                                         | N-Term(iTRAQ4plex), K14(iTRAQ4plex)                  | 1847.01908 | 70 | 48  |      | 4.21  | Expt2 |
| AGELTEDEVER            | 5  | 6755368:149252587:149263957:94395028:94395371:149264584:149264635 | N-Term(iTRAQ4plex)                                   | 1391.67803 | 70 | 63  |      | 4.19  | Expt2 |
| AGELTQDEVER            | 5  | 149259085                                                         | N-Term(iTRAQ4plex), Q6(Deamidated)                   | 1391.67803 | 70 | 63  |      | 4.19  | Expt2 |
| TTYLVLEADR             | 11 | 83816893                                                          | N-Term(iTRAQ4plex)                                   | 1439.75200 | 70 | 61  |      | 4.43  | Expt2 |
| SONIITDSSSLNAEAIK      | 5  | 117938332:117938334                                               | N-Term(iTRAQ4plex)                                   | 1963.01653 | 70 | 99  |      | 4.63  | Expt2 |
| EALLETDTGLSGSEER       | 16 | 134288917                                                         | N-Term(iTRAQ4plex)                                   | 1963.99870 | 70 | 97  |      | 4.80  | Expt2 |
| VOSLOATFGTFESLLR       | 7  | 62526118                                                          | N-Term(iTRAQ4plex)                                   | 1941.05705 | 70 | 92  | 0.99 | 5.57  | Expt2 |
| DLADELALVDMDEK         | 15 | 6754524:257743039                                                 | N-Term(iTRAQ4plex), M12(Oxidation), K15(iTRAQ4plex)  | 1980.00957 | 70 | 85  |      | 5.56  | Expt2 |
| FNISNGGPAPEAITDK       | 3  | 227330633                                                         | N-Term(iTRAQ4plex), N5(Deamidated), K16(iTRAQ4plex)  | 1919.99419 | 70 | 76  |      | 4.03  | Expt2 |

|                                   |    |                                                     |                                                                      |            |    |     |      |      |       |
|-----------------------------------|----|-----------------------------------------------------|----------------------------------------------------------------------|------------|----|-----|------|------|-------|
| YDPTIEDSYR                        | 9  | 21704066:149261508                                  | N-Term(iTRAQ4plex)                                                   | 1402.66167 | 70 | 54  |      | 3.82 | Expt2 |
| DOLVNLK                           | 19 | 149271040:149271078:6754524:257743039               | N-Term(iTRAQ4plex), K9(iTRAQ4plex)                                   | 1343.85198 | 70 | 64  |      | 3.87 | Expt2 |
| YLGQDYETLR                        | 11 | 160333229                                           | N-Term(iTRAQ4plex)                                                   | 1401.71526 | 70 | 47  |      | 3.97 | Expt2 |
| NVTELNEPLSNEER                    | 24 | 31543976                                            | N-Term(iTRAQ4plex)                                                   | 1787.89141 | 70 | 76  |      | 4.50 | Expt2 |
| LVADFMK                           | 4  | 6724311                                             | N-Term(iTRAQ4plex), K8(iTRAQ4plex)                                   | 1182.68938 | 70 | 68  |      |      | Expt2 |
| GTGGVDTAAVGGVFDVSNADR             | 3  | 10946574                                            | N-Term(iTRAQ4plex)                                                   | 2109.03520 | 70 | 63  |      | 4.99 | Expt2 |
| DAEAFLEK                          | 41 | 118130981                                           | N-Term(iTRAQ4plex), K9(iTRAQ4plex)                                   | 1396.74114 | 70 | 62  |      | 4.42 | Expt2 |
| YSVDIPLDK                         | 9  | 149262383:82881899:82907223:82913824:20344851       | N-Term(iTRAQ4plex), K9(iTRAQ4plex)                                   | 1337.76079 | 70 | 78  |      | 3.84 | Expt2 |
| GDMMCVNQNNGYLCIPR                 | 11 | 6753824                                             | N-Term(iTRAQ4plex), C5(Methylthio), N9(Deamidated), C14(Methylthio)  | 2107.86870 | 70 | 72  |      | 4.84 | Expt2 |
| SELISYLTPDVR                      | 11 | 226423931                                           | N-Term(iTRAQ4plex)                                                   | 1623.87517 | 70 | 61  |      | 3.96 | Expt2 |
| GSTDNLMDIER                       | 11 | 126723461                                           | N-Term(iTRAQ4plex)                                                   | 1509.69756 | 70 | 69  |      | 5.31 | Expt2 |
| IGGIGTVPVGR                       | 56 | 126032329:6681273                                   | N-Term(iTRAQ4plex)                                                   | 1169.71489 | 70 | 68  |      | 3.97 | Expt2 |
| ESTGAOVQAGDMLPNSTER               | 19 | 157042772:6754994:157041229:157057549:171906586     | N-Term(iTRAQ4plex)                                                   | 2234.08599 | 70 | 100 |      | 6.42 | Expt2 |
| AEYEFLTPMEEAPK                    | 5  | 31982030                                            | N-Term(iTRAQ4plex), M10(Oxidation), K15(iTRAQ4plex)                  | 2088.01279 | 70 | 49  |      | 4.06 | Expt2 |
| VVDLLAPYAK                        | 6  | 31980648                                            | N-Term(iTRAQ4plex), K10(iTRAQ4plex)                                  | 1376.83550 | 69 | 66  |      | 3.60 | Expt2 |
| DTANWLEINPETGAIFTR                | 17 | 6753374                                             | N-Term(iTRAQ4plex)                                                   | 2192.12187 | 69 | 76  |      | 5.54 | Expt2 |
| ICILEPTEGNDMSPYEAYK               | 11 | 111185907                                           | N-Term(iTRAQ4plex), C2(Methylthio), K19(iTRAQ4plex)                  | 2507.17875 | 69 | 58  |      | 5.62 | Expt2 |
| SVSAPFCNPNVLCSWGK                 | 6  | 13937355                                            | N-Term(iTRAQ4plex), C9(Methylthio), C14(Methylthio), K18(iTRAQ4plex) | 2259.10063 | 69 | 98  |      | 5.54 | Expt2 |
| DLTADTEYQISVFAMK                  | 14 | 111074529                                           | N-Term(iTRAQ4plex), M15(Oxidation), K16(iTRAQ4plex)                  | 2136.08452 | 69 | 84  |      | 5.09 | Expt2 |
| YSTNTQIQVLPEGETPIFK               | 13 | 226246550:226246552                                 | N-Term(iTRAQ4plex), K20(iTRAQ4plex)                                  | 2510.34355 | 69 | 79  |      | 5.46 | Expt2 |
| DMGEMVTOGOTDAQYMLR                | 4  | 117938332:117938334                                 | N-Term(iTRAQ4plex)                                                   | 2365.08304 | 69 | 69  |      | 4.50 | Expt2 |
| GDIASQNMNR                        | 21 | 111074529                                           | N-Term(iTRAQ4plex)                                                   | 1266.60698 | 69 | 63  |      | 3.77 | Expt2 |
| EOSILELGSLLAK                     | 9  | 134053905                                           | N-Term(iTRAQ4plex), K13(iTRAQ4plex)                                  | 1689.00945 | 69 | 73  |      | 4.46 | Expt2 |
| TLASLSPETSLFHASK                  | 5  | 94380203:254553458                                  | N-Term(iTRAQ4plex), K17(iTRAQ4plex)                                  | 2066.20200 | 69 | 44  |      | 4.50 | Expt2 |
| GPYSNPYSTSYSGPYAAAPPVSNPTISRPLVCR | 3  | 6753824                                             | N-Term(iTRAQ4plex), C36(Methylthio)                                  | 4087.98379 | 69 | 40  |      | 3.61 | Expt2 |
| NFLDQTNVSAAAOR                    | 34 | 160333923                                           | N-Term(iTRAQ4plex)                                                   | 1791.95232 | 69 | 98  |      | 6.49 | Expt2 |
| APSIIFIDELDAIGTK                  | 4  | 228008337                                           | N-Term(iTRAQ4plex), K16(iTRAQ4plex)                                  | 1991.13205 | 69 | 57  | 0.99 | 4.64 | Expt2 |
| DAGVIAGLNVLR                      | 82 | 124339838:124339829:124339826                       | N-Term(iTRAQ4plex)                                                   | 1341.79456 | 69 | 80  |      | 4.89 | Expt2 |
| EYVLTQQGFYIGOSVK                  | 6  | 6678329                                             | N-Term(iTRAQ4plex), K16(iTRAQ4plex)                                  | 2148.16404 | 69 | 66  |      | 5.25 | Expt2 |
| TVAGGAWYNTTSAVTVK                 | 9  | 94367375                                            | N-Term(iTRAQ4plex), K18(iTRAQ4plex)                                  | 2115.13384 | 69 | 80  |      | 5.11 | Expt2 |
| ILTFDQLALESPK                     | 33 | 83699424                                            | N-Term(iTRAQ4plex), K13(iTRAQ4plex)                                  | 1763.02800 | 69 | 98  | 1.16 | 5.04 | Expt2 |
| LYLTVVYVPVTFK                     | 21 | 149234297:82895052:82898755:149267404               | N-Term(iTRAQ4plex), K14(iTRAQ4plex)                                  | 1933.13481 | 69 | 77  |      | 4.69 | Expt2 |
| AEYEFLTPMEEAPK                    | 34 | 31982030                                            | N-Term(iTRAQ4plex), K15(iTRAQ4plex)                                  | 2072.01396 | 69 | 71  | 1.56 | 5.11 | Expt2 |
| EIFLSOPILLELEAPLK                 | 6  | 161484668:31980772:13994195                         | N-Term(iTRAQ4plex), K17(iTRAQ4plex)                                  | 2241.34293 | 69 | 47  |      | 6.60 | Expt2 |
| SSPVIIDASTAIDAPSNLR               | 17 | 46849812                                            | N-Term(iTRAQ4plex)                                                   | 2071.11797 | 69 | 114 | 1.17 | 5.75 | Expt2 |
| GOETSNPIASIFAWSR                  | 11 | 162417975                                           | N-Term(iTRAQ4plex)                                                   | 2009.02349 | 69 | 111 |      | 5.03 | Expt2 |
| VFGSTTEDYNLIVIER                  | 11 | 170295840                                           | N-Term(iTRAQ4plex)                                                   | 2097.09795 | 69 | 101 |      | 4.47 | Expt2 |
| SFITTDVNPYYDSFVR                  | 7  | 120537241                                           | N-Term(iTRAQ4plex)                                                   | 2068.02031 | 69 | 50  | 0.99 | 3.86 | Expt2 |
| AIGVLTSGDQAGMNAAVR                | 8  | 9790051:31560653                                    | N-Term(iTRAQ4plex)                                                   | 1932.00408 | 69 | 135 |      | 4.71 | Expt2 |
| LDYDEDASMLR                       | 7  | 19526912                                            | N-Term(iTRAQ4plex)                                                   | 1542.72515 | 69 | 69  |      | 4.74 | Expt2 |
| AGFAGDDAPR                        | 31 | 6671509:6752954:6671507:157823889:14192922:33563240 | N-Term(iTRAQ4plex)                                                   | 1120.55425 | 69 | 68  |      | 3.80 | Expt2 |
| VDILDALLR                         | 11 | 228008337                                           | N-Term(iTRAQ4plex)                                                   | 1268.77068 | 69 | 46  |      | 3.42 | Expt2 |
| LDISAPDLNLEGPEGK                  | 11 | 61743961                                            | N-Term(iTRAQ4plex), K16(iTRAQ4plex)                                  | 1956.05376 | 69 | 95  |      | 6.28 | Expt2 |
| DCEOENWMAAR                       | 9  | 115496850                                           | N-Term(iTRAQ4plex), C2(Methylthio)                                   | 1613.66106 | 69 | 80  |      | 5.21 | Expt2 |
| YSYVCPDLVK                        | 10 | 23956222                                            | N-Term(iTRAQ4plex), C5(Methylthio), K10(iTRAQ4plex)                  | 1520.77654 | 69 | 76  |      | 4.08 | Expt2 |
| GGNTLTGMALNFR                     | 36 | 111074529                                           | N-Term(iTRAQ4plex), M8(Oxidation)                                    | 1624.86553 | 69 | 83  |      | 5.22 | Expt2 |
| NLALCPANHAPLQEAIVPR               | 8  | 28395018                                            | N-Term(iTRAQ4plex), C5(Methylthio)                                   | 2288.21555 | 69 | 53  |      | 5.65 | Expt2 |
| DTNLGQPVVQDFEODGR                 | 22 | 170172540                                           | N-Term(iTRAQ4plex)                                                   | 2089.04839 | 69 | 86  | 0.99 | 5.64 | Expt2 |
| SLSSPNCFGPOPGGPEMR                | 3  | 161484644                                           | N-Term(iTRAQ4plex), C7(Methylthio)                                   | 2050.92436 | 69 | 111 |      | 5.13 | Expt2 |
| WALLOEOGTK                        | 49 | 51092301:20911031:54607171:113195684                | N-Term(iTRAQ4plex), K10(iTRAQ4plex)                                  | 1461.83220 | 69 | 74  |      | 4.71 | Expt2 |
| TLLGSSDNVATVSNIEK                 | 16 | 225690566                                           | N-Term(iTRAQ4plex), K17(iTRAQ4plex)                                  | 2036.11162 | 69 | 120 |      | 5.53 | Expt2 |
| SLAENYFDSTGR                      | 16 | 21489937                                            | N-Term(iTRAQ4plex)                                                   | 1503.71990 | 69 | 65  |      | 4.36 | Expt2 |

|                                     |     |                                                                    |                                                                                     |            |    |     |      |       |       |
|-------------------------------------|-----|--------------------------------------------------------------------|-------------------------------------------------------------------------------------|------------|----|-----|------|-------|-------|
| AASGFNATEDAQTLR                     | 10  | 161016799                                                          | N-Term(iTRAQ4plex)                                                                  | 1695.84526 | 69 | 105 |      | 5.10  | Expt2 |
| VGINYQPPTVVPGLAK                    | 60  | 6755901;34740335;6678465;6678467;51765047;82930560;8394493;6678469 | N-Term(iTRAQ4plex), K18(iTRAQ4plex)                                                 | 2113.18926 | 69 | 73  |      | 6.36  | Expt2 |
| ISGVGIDOPPYGFIINQK                  | 14  | 169234958;32129201;32129205                                        | N-Term(iTRAQ4plex), K19(iTRAQ4plex)                                                 | 2347.32969 | 69 | 73  |      | 5.10  | Expt2 |
| VGWEQLLTTIAR                        | 38  | 61097906;11230802                                                  | N-Term(iTRAQ4plex)                                                                  | 1530.88249 | 69 | 67  | 0.99 | 5.18  | Expt2 |
| LVQAFQFTDK                          | 8   | 94400195;149267887;6754976                                         | N-Term(iTRAQ4plex), K10(iTRAQ4plex)                                                 | 1484.84636 | 69 | 69  | 1.48 | 4.17  | Expt2 |
| GNPSGIQPDLLISLTAPK                  | 11  | 21553309                                                           | N-Term(iTRAQ4plex), K18(iTRAQ4plex)                                                 | 2109.22336 | 69 | 64  |      | 4.55  | Expt2 |
| GFIGPGIDVPAPDMSTGER                 | 16  | 6680027                                                            | N-Term(iTRAQ4plex)                                                                  | 2060.02129 | 69 | 97  |      | 4.70  | Expt2 |
| ALYEAELSQMOTHISDTSVLLSMDNRR         | 10  | 54607171                                                           | N-Term(iTRAQ4plex)                                                                  | 3196.53916 | 69 | 82  |      | 7.07  | Expt2 |
| SMVEDITGLR                          | 22  | 82950147;82950149;149264086                                        | N-Term(iTRAQ4plex)                                                                  | 1264.67095 | 69 | 58  |      | 4.17  | Expt2 |
| GGAGGMIGMGIAGSSGGSLCISFGNDGGLLSGSEK | 20  | 149262636;118130981                                                | N-Term(iTRAQ4plex), M6(Oxidation), M10(Oxidation), C22(Methylthio), K37(iTRAQ4plex) | 3581.64658 | 68 | 111 |      | 6.95  | Expt2 |
| SQIVVEEGSEPSLMK                     | 8   | 226246550;226246552                                                | N-Term(iTRAQ4plex), K17(iTRAQ4plex)                                                 | 2163.14238 | 68 | 104 |      | 5.28  | Expt2 |
| NIEDVIAGVGK                         | 12  | 149263166;83745120                                                 | N-Term(iTRAQ4plex), K12(iTRAQ4plex)                                                 | 1530.88164 | 68 | 81  |      | 4.21  | Expt2 |
| TAMNVNDFLAIK                        | 5   | 28916687;149249575                                                 | N-Term(iTRAQ4plex), K14(iTRAQ4plex)                                                 | 1809.02890 | 68 | 50  |      | 3.77  | Expt2 |
| LPFFIIDDK                           | 17  | 28916703;6671549                                                   | N-Term(iTRAQ4plex), K9(iTRAQ4plex)                                                  | 1345.80181 | 68 | 78  |      | 3.47  | Expt2 |
| DVDETIKGIK                          | 3   | 115496850                                                          | N-Term(iTRAQ4plex), K10(iTRAQ4plex)                                                 | 1463.80498 | 68 | 59  |      | 3.66  | Expt2 |
| ATPFIKNGGR                          | 9   | 226437587                                                          | N-Term(iTRAQ4plex), C7(Methylthio), N8(Deamidated)                                  | 1355.62004 | 68 | 73  |      | 4.08  | Expt2 |
| SINLEDDADR                          | 12  | 111185907                                                          | N-Term(iTRAQ4plex)                                                                  | 1419.68413 | 68 | 60  |      | 4.17  | Expt2 |
| SAGVSVPGMGPSPGR                     | 45  | 34328108                                                           | N-Term(iTRAQ4plex), M10(Oxidation)                                                  | 1612.82341 | 68 | 60  |      | 4.85  | Expt2 |
| FMTEDTTDAPFR                        | 6   | 114158675                                                          | N-Term(iTRAQ4plex)                                                                  | 1574.72869 | 68 | 46  |      | 4.51  | Expt2 |
| GMTLVYIQLLLLFASK                    | 3   | 150456419                                                          | N-Term(iTRAQ4plex), M2(Oxidation), K16(iTRAQ4plex)                                  | 2036.21335 | 68 | 53  |      | 4.44  | Expt2 |
| TEPTAQONLALQAEK                     | 3   | 149258001;22203755                                                 | N-Term(iTRAQ4plex), K16(iTRAQ4plex)                                                 | 2043.13749 | 68 | 44  |      | 4.99  | Expt2 |
| DLYLENPEIK                          | 11  | 6678329                                                            | N-Term(iTRAQ4plex), K10(iTRAQ4plex)                                                 | 1521.84245 | 68 | 56  |      | 4.96  | Expt2 |
| NIVEEIEDLVAR                        | 9   | 34996495                                                           | N-Term(iTRAQ4plex)                                                                  | 1543.84966 | 68 | 73  |      | 4.27  | Expt2 |
| GCTFLVGLIQK                         | 15  | 157951598                                                          | N-Term(iTRAQ4plex), C2(Methylthio), K11(iTRAQ4plex)                                 | 1512.85893 | 68 | 55  | 1.04 | 4.58  | Expt2 |
| YGGDEIPSPYR                         | 7   | 125347376                                                          | N-Term(iTRAQ4plex)                                                                  | 1544.75224 | 68 | 58  |      | 3.92  | Expt2 |
| FNADEFEDMVAEK                       | 15  | 149249582;149249685;149259021                                      | N-Term(iTRAQ4plex), K13(iTRAQ4plex)                                                 | 1832.86064 | 68 | 86  |      | 5.09  | Expt2 |
| ASGPNLNTTGVPSLPEVFTIDAK             | 6   | 125347376                                                          | N-Term(iTRAQ4plex), K24(iTRAQ4plex)                                                 | 2630.43546 | 68 | 68  |      | 6.16  | Expt2 |
| AFLGGQEAETDIALLLR                   | 5   | 118601017                                                          | N-Term(iTRAQ4plex)                                                                  | 1960.10227 | 68 | 83  |      | 6.80  | Expt2 |
| DISSAVQANPALTSLR                    | 19  | 31981748;285402638;285402659                                       | N-Term(iTRAQ4plex)                                                                  | 2029.10831 | 68 | 66  |      | 6.07  | Expt2 |
| GSCATPGAGSDICFMOK                   | 7   | 9790161                                                            | N-Term(iTRAQ4plex), C3(Methylthio), C13(Methylthio), K17(iTRAQ4plex)                | 2052.89078 | 68 | 61  |      | 4.98  | Expt2 |
| GSPCQDCDGTGYR                       | 4   | 183979966                                                          | N-Term(iTRAQ4plex), C4(Methylthio), C7(Methylthio)                                  | 1638.61308 | 68 | 62  |      | 4.94  | Expt2 |
| IDFYFDENPYFENK                      | 18  | 56606037;149256951;149260101;149260103                             | N-Term(iTRAQ4plex), K14(iTRAQ4plex)                                                 | 2129.01689 | 68 | 76  |      | 4.38  | Expt2 |
| VSVATPDVLSLEASEGAVK                 | 18  | 61743961                                                           | N-Term(iTRAQ4plex), K18(iTRAQ4plex)                                                 | 2047.12065 | 68 | 103 | 1.48 | 5.43  | Expt2 |
| SGSGTMNLGGSLTR                      | 3   | 6753262;83649737                                                   | N-Term(iTRAQ4plex), M6(Oxidation)                                                   | 1497.74712 | 68 | 67  |      | 4.20  | Expt2 |
| GYELLFQPEVVR                        | 14  | 146219835;146219830;146219849;146231979                            | N-Term(iTRAQ4plex)                                                                  | 1593.87920 | 68 | 57  |      | 4.51  | Expt2 |
| TVEEGAETPYVLLPPDATEPHGQLVR          | 6   | 27413160                                                           | N-Term(iTRAQ4plex)                                                                  | 3146.65464 | 68 | 57  |      | 4.93  | Expt2 |
| IILEIDNAR                           | 40  | 6754480                                                            | N-Term(iTRAQ4plex)                                                                  | 1200.70659 | 68 | 56  |      | 3.61  | Expt2 |
| ODLPNANMAEITDK                      | 8   | 6680718;6680716;6671571                                            | N-Term(iTRAQ4plex), K15(iTRAQ4plex)                                                 | 1918.97893 | 68 | 83  |      | 5.34  | Expt2 |
| QASGGPVDIGPEYQDLDLR                 | 7   | 94397536                                                           | N-Term(iTRAQ4plex)                                                                  | 2189.05936 | 68 | 80  |      | 5.46  | Expt2 |
| CMPTFOFYK                           | 11  | 6755911                                                            | N-Term(iTRAQ4plex), C1(Methylthio), K9(iTRAQ4plex)                                  | 1498.71282 | 68 | 51  |      | 3.48  | Expt2 |
| EQFLDGDAWTNR                        | 27  | 6680836                                                            | N-Term(iTRAQ4plex)                                                                  | 1595.75791 | 68 | 58  |      | 4.96  | Expt2 |
| ETFLTSPEELYR                        | 9   | 22122515                                                           | N-Term(iTRAQ4plex)                                                                  | 1628.83061 | 68 | 48  |      | 4.64  | Expt2 |
| GFFVQPTVFSNVTDEMR                   | 24  | 7106242;85861182                                                   | N-Term(iTRAQ4plex), M16(Oxidation)                                                  | 2134.04514 | 68 | 68  |      | 4.86  | Expt2 |
| LVYQITPPGSVSDPSQLNLVYR              | 8   | 33469047                                                           | N-Term(iTRAQ4plex)                                                                  | 2691.45792 | 68 | 77  |      | 5.24  | Expt2 |
| VIFFLPWEK                           | 7   | 224922803                                                          | N-Term(iTRAQ4plex), K9(iTRAQ4plex)                                                  | 1466.86711 | 68 | 55  | 0.99 | 3.76  | Expt2 |
| ALALGALQNIIR                        | 107 | 111074529                                                          | N-Term(iTRAQ4plex)                                                                  | 1283.79187 | 68 | 92  |      | 4.44  | Expt2 |
| DIISDTSGDFR                         | 48  | 149260099;6996913                                                  | N-Term(iTRAQ4plex)                                                                  | 1369.67290 | 68 | 67  |      | 4.27  | Expt2 |
| YSAPCSAGYNA                         | 11  | 148277039                                                          | N-Term(iTRAQ4plex), C5(Methylthio)                                                  | 1350.55913 | 68 | 84  |      | Expt2 |       |
| NOAPGQPGASQWGSR                     | 3   | 169790818;169790823;169790820                                      | N-Term(iTRAQ4plex)                                                                  | 1684.83171 | 68 | 63  |      | 4.21  | Expt2 |
| VGAEATETALCLVEK                     | 9   | 6806903;158635979;31542159;254039660;254039658                     | N-Term(iTRAQ4plex), C11(Methylthio), K15(iTRAQ4plex)                                | 1897.99468 | 68 | 84  |      | 5.24  | Expt2 |
| FLVPGDGPVVR                         | 13  | 84871986                                                           | N-Term(iTRAQ4plex)                                                                  | 1299.75432 | 68 | 52  |      | 3.50  | Expt2 |
| LAATNALLNSLEFTK                     | 8   | 88014720                                                           | N-Term(iTRAQ4plex), K15(iTRAQ4plex)                                                 | 1894.09795 | 68 | 83  |      | 4.72  | Expt2 |

|                                         |     |                                                                                                                                                           |                                                                                                    |            |    |     |      |      |       |
|-----------------------------------------|-----|-----------------------------------------------------------------------------------------------------------------------------------------------------------|----------------------------------------------------------------------------------------------------|------------|----|-----|------|------|-------|
| ITWAPVGNPK                              | 11  | 111074529                                                                                                                                                 | N-Term(iTRAQ4plex), K11(iTRAQ4plex)                                                                | 1485.83086 | 68 | 72  |      | 4.12 | Expt2 |
| GLSOSALPYR                              | 18  | 149257465;149257815;82918395;94390143                                                                                                                     | N-Term(iTRAQ4plex)                                                                                 | 1235.68950 | 68 | 47  |      | 4.35 | Expt2 |
| NHPFDQMTIDDLNEIFPETK                    | 3   | 149266312;21313679                                                                                                                                        | N-Term(iTRAQ4plex), K21(iTRAQ4plex)                                                                | 2781.43375 | 68 | 71  |      | 6.47 | Expt2 |
| SVIEPLPVTPT                             | 7   | 112181194                                                                                                                                                 | N-Term(iTRAQ4plex)                                                                                 | 1452.85735 | 68 | 65  |      |      | Expt2 |
| LGDLYEEEMR                              | 12  | 31982755                                                                                                                                                  | N-Term(iTRAQ4plex)                                                                                 | 1398.66789 | 67 | 56  |      | 4.22 | Expt2 |
| TNGKEPPELPIPIEYFMA                      | 5   | 149249111;82885114;149251901;149251962;149255371;149257782;149259532;149262565;82949522;38075571;51770297;149269802;149270175;83013315;94410221;162417994 | N-Term(iTRAQ4plex), N2(Deamidated), K4(iTRAQ4plex)                                                 | 2367.21274 | 67 | 41  |      | 3.43 | Expt2 |
| LVPGGATEIELAK                           | 3   | 126723461                                                                                                                                                 | N-Term(iTRAQ4plex), K14(iTRAQ4plex)                                                                | 1642.96379 | 67 | 92  |      | 3.79 | Expt2 |
| NIVLSGGSTMFR                            | 13  | 23956222                                                                                                                                                  | N-Term(iTRAQ4plex)                                                                                 | 1425.76421 | 67 | 62  |      | 3.92 | Expt2 |
| WDPAPGPVQQYR                            | 77  | 111074529                                                                                                                                                 | N-Term(iTRAQ4plex)                                                                                 | 1557.79241 | 67 | 59  |      | 5.06 | Expt2 |
| VNIHGEVVDGSDTLK                         | 8   | 31542111;255759888;255759890                                                                                                                              | N-Term(iTRAQ4plex), K16(iTRAQ4plex)                                                                | 1975.10369 | 67 | 85  |      | 4.58 | Expt2 |
| EDIYAVEIVGGATR                          | 14  | 112293266                                                                                                                                                 | N-Term(iTRAQ4plex)                                                                                 | 1636.87139 | 67 | 73  |      | 4.60 | Expt2 |
| ILYSQCGDVMR                             | 14  | 33620739;94363353                                                                                                                                         | N-Term(iTRAQ4plex), C6(Methylthio)                                                                 | 1474.69719 | 67 | 51  |      | 4.24 | Expt2 |
| VADGLPLAASMOEDEQSGR                     | 4   | 6755448                                                                                                                                                   | N-Term(iTRAQ4plex)                                                                                 | 2118.02781 | 67 | 52  | 0.97 | 5.26 | Expt2 |
| AQFGOPELLLGTIPGAGGTOR                   | 23  | 29789289                                                                                                                                                  | N-Term(iTRAQ4plex)                                                                                 | 2255.23174 | 67 | 84  | 1.07 | 5.04 | Expt2 |
| VISGVLQGNIAFK                           | 15  | 114326446                                                                                                                                                 | N-Term(iTRAQ4plex), K14(iTRAQ4plex)                                                                | 1747.08049 | 67 | 80  |      | 4.47 | Expt2 |
| ALGONPTNAEVLK                           | 9   | 33620739;94363353;94383790;26986555                                                                                                                       | N-Term(iTRAQ4plex), K13(iTRAQ4plex)                                                                | 1642.93682 | 67 | 69  |      | 5.02 | Expt2 |
| DAEEVISQTIIDIVMIK                       | 3   | 6753484                                                                                                                                                   | N-Term(iTRAQ4plex), K18(iTRAQ4plex)                                                                | 2308.22806 | 67 | 89  |      | 5.65 | Expt2 |
| EOASGVVSEFOPEYSVSR                      | 6   | 110735428;110735426                                                                                                                                       | N-Term(iTRAQ4plex)                                                                                 | 2143.03740 | 67 | 100 |      | 5.42 | Expt2 |
| QWIOISDAVYR                             | 5   | 22122641                                                                                                                                                  | N-Term(iTRAQ4plex)                                                                                 | 1522.81609 | 67 | 48  |      | 4.01 | Expt2 |
| VVPLMELPIR                              | 10  | 34538601;167716840                                                                                                                                        | N-Term(iTRAQ4plex)                                                                                 | 1310.80120 | 67 | 50  |      | 3.71 | Expt2 |
| SGSGSSAMCGGAGFGSR                       | 3   | 54607171;113195684                                                                                                                                        | N-Term(iTRAQ4plex), M8(Oxidation), C9(Methylthio)                                                  | 1651.67412 | 67 | 67  |      | 5.18 | Expt2 |
| MMADEALDSGLVSR                          | 3   | 7949037                                                                                                                                                   | N-Term(iTRAQ4plex)                                                                                 | 1638.80071 | 67 | 57  |      | 4.48 | Expt2 |
| DITLECISSGEP                            | 10  | 149253040;183979966                                                                                                                                       | N-Term(iTRAQ4plex), C6(Methylthio)                                                                 | 1609.76970 | 67 | 53  |      | 4.05 | Expt2 |
| VLNMEIGTSLYDEEGAK                       | 5   | 70778976                                                                                                                                                  | N-Term(iTRAQ4plex), M5(Oxidation), K18(iTRAQ4plex)                                                 | 2287.13779 | 67 | 76  |      | 5.63 | Expt2 |
| LEMEIETVR                               | 151 | 118130981                                                                                                                                                 | N-Term(iTRAQ4plex)                                                                                 | 1327.67046 | 67 | 55  |      | 4.21 | Expt2 |
| YDDEECTLIPIAGR                          | 5   | 118197277                                                                                                                                                 | N-Term(iTRAQ4plex), C6(Methylthio)                                                                 | 1671.75408 | 67 | 85  |      | 5.17 | Expt2 |
| QAALQVADGFISR                           | 13  | 110227377                                                                                                                                                 | N-Term(iTRAQ4plex)                                                                                 | 1519.83550 | 67 | 59  |      | 4.84 | Expt2 |
| AFGANPVVEIDQYLSK                        | 5   | 41054974                                                                                                                                                  | N-Term(iTRAQ4plex), K18(iTRAQ4plex)                                                                | 2283.17905 | 67 | 61  |      | 4.91 | Expt2 |
| AAESLADPTEYENLPLGLK                     | 8   | 29789808                                                                                                                                                  | N-Term(iTRAQ4plex), K19(iTRAQ4plex)                                                                | 2353.21872 | 67 | 60  |      | 4.65 | Expt2 |
| QTALAEVLK                               | 7   | 163310765                                                                                                                                                 | N-Term(iTRAQ4plex), K9(iTRAQ4plex)                                                                 | 1260.78801 | 67 | 52  |      | 4.13 | Expt2 |
| QAIPLDQNEGIYQDVK                        | 3   | 239052674                                                                                                                                                 | N-Term(iTRAQ4plex), K17(iTRAQ4plex)                                                                | 2218.20261 | 67 | 54  |      | 5.00 | Expt2 |
| ITAVPTLLK                               | 9   | 13386060                                                                                                                                                  | N-Term(iTRAQ4plex), K9(iTRAQ4plex)                                                                 | 1243.82561 | 67 | 65  |      | 3.51 | Expt2 |
| IDMYADGTQDLMMMIAVAPFK                   | 7   | 160298217                                                                                                                                                 | N-Term(iTRAQ4plex), M3(Oxidation), M12(Oxidation), M13(Oxidation), M14(Oxidation), K21(iTRAQ4plex) | 2713.29306 | 67 | 70  |      | 5.17 | Expt2 |
| MAPYQGPDAAPGALDYK                       | 8   | 11230802                                                                                                                                                  | N-Term(iTRAQ4plex), M1(Oxidation), K17(iTRAQ4plex)                                                 | 2069.02861 | 67 | 79  |      | 4.94 | Expt2 |
| ITSLIVENQNLK                            | 8   | 56699438;54287684                                                                                                                                         | N-Term(iTRAQ4plex)                                                                                 | 1559.85088 | 67 | 61  |      | 5.24 | Expt2 |
| LMIEMDGTENK                             | 5   | 149249466;149253386;149259350                                                                                                                             | N-Term(iTRAQ4plex), K11(iTRAQ4plex)                                                                | 1568.79497 | 67 | 64  |      | 3.81 | Expt2 |
| TLTPIHQEYFEHGDITNEVAEMLR                | 3   | 110625656;270309161                                                                                                                                       | N-Term(iTRAQ4plex)                                                                                 | 2850.40976 | 67 | 40  |      | 6.09 | Expt2 |
| TLMLNGLGLAVAR                           | 11  | 30519911                                                                                                                                                  | N-Term(iTRAQ4plex)                                                                                 | 1359.79033 | 67 | 74  |      | 4.14 | Expt2 |
| LPPPPGECTFDDECAFTQEK                    | 16  | 33469047                                                                                                                                                  | N-Term(iTRAQ4plex), C8(Methylthio), C15(Methylthio), K21(iTRAQ4plex)                               | 2732.20090 | 67 | 89  |      | 6.93 | Expt2 |
| TINEVENQILTR                            | 65  | 61097906;11230802                                                                                                                                         | N-Term(iTRAQ4plex)                                                                                 | 1573.86809 | 67 | 67  |      | 5.15 | Expt2 |
| DLEFTIYDDDDVSPFLDGLLEERPOR              | 3   | 33563282                                                                                                                                                  | N-Term(iTRAQ4plex)                                                                                 | 3128.48618 | 67 | 53  |      | 3.85 | Expt2 |
| ELGVGLALR                               | 6   | 82995623;6754450                                                                                                                                          | N-Term(iTRAQ4plex)                                                                                 | 1071.66655 | 67 | 53  |      |      | Expt2 |
| DLTDYLMK                                | 23  | 6671509;6752954;6671507;157823889;14192922;33563240;30425250                                                                                              | N-Term(iTRAQ4plex), K8(iTRAQ4plex)                                                                 | 1286.69634 | 67 | 49  |      | 4.01 | Expt2 |
| VPAPASTASDEAPGAPAPPEPPESCAPEPAPEGPSQSER | 6   | 58037101                                                                                                                                                  | N-Term(iTRAQ4plex), C25(Methylthio)                                                                | 4025.83022 | 67 | 33  |      | 6.95 | Expt2 |
| AAPSAEFSVDR                             | 6   | 21704174                                                                                                                                                  | N-Term(iTRAQ4plex)                                                                                 | 1293.65581 | 67 | 58  |      | 4.17 | Expt2 |
| GIVDSITGQR                              | 19  | 82950147;82950149;149264086                                                                                                                               | N-Term(iTRAQ4plex)                                                                                 | 1189.66533 | 67 | 53  |      | 3.57 | Expt2 |
| EISLWFOPEELVEYK                         | 3   | 149262292;149274354                                                                                                                                       | N-Term(iTRAQ4plex), K15(iTRAQ4plex)                                                                | 2198.16483 | 67 | 45  |      | 4.70 | Expt2 |
| IPSAVGYOPLATDMGTMQER                    | 26  | 31980648                                                                                                                                                  | N-Term(iTRAQ4plex), M15(Oxidation)                                                                 | 2426.19010 | 67 | 73  |      | 6.08 | Expt2 |
| GPTISAAEQAAQAALQOAR                     | 11  | 124487346                                                                                                                                                 | N-Term(iTRAQ4plex)                                                                                 | 2125.14897 | 66 | 131 |      | 7.07 | Expt2 |
| GVTQYYAVYTER                            | 3   | 6681159                                                                                                                                                   | N-Term(iTRAQ4plex)                                                                                 | 1593.80022 | 66 | 40  |      | 4.60 | Expt2 |

|                                  |     |                                                                                                                      |                                                                                     |            |    |     |      |      |       |
|----------------------------------|-----|----------------------------------------------------------------------------------------------------------------------|-------------------------------------------------------------------------------------|------------|----|-----|------|------|-------|
| IANLQTLDSGLR                     | 5   | 125347376                                                                                                            | N-Term(iTRAQ4plex)                                                                  | 1559.85198 | 66 | 58  |      | 3.87 | Expt2 |
| ISNPDEYFK                        | 21  | 160333372                                                                                                            | N-Term(iTRAQ4plex), K10(iTRAQ4plex)                                                 | 1513.82439 | 66 | 59  |      | 3.96 | Expt2 |
| LTPITYPQGLAMAK                   | 6   | 45592934                                                                                                             | N-Term(iTRAQ4plex), K14(iTRAQ4plex)                                                 | 1792.03569 | 66 | 98  |      | 4.41 | Expt2 |
| SFPDFPIPVLFRR                    | 5   | 118601013                                                                                                            | N-Term(iTRAQ4plex)                                                                  | 1635.90544 | 66 | 63  |      | 4.14 | Expt2 |
| LFYAPTSGGPEELVPIPGNTNYAILR       | 12  | 111074529                                                                                                            | N-Term(iTRAQ4plex), Y22(iTRAQ4plex)                                                 | 3077.66233 | 66 | 47  |      | 5.58 | Expt2 |
| GNWGLDQVAALR                     | 6   | 37718991:268839831                                                                                                   | N-Term(iTRAQ4plex)                                                                  | 1590.85356 | 66 | 69  |      | 4.46 | Expt2 |
| DIDECDIVPDACK                    | 18  | 164607147                                                                                                            | N-Term(iTRAQ4plex), C5(Methylthio), C12(Methylthio), K13(iTRAQ4plex)                | 1815.78874 | 66 | 82  |      | 3.94 | Expt2 |
| TAEYDVAFGER                      | 126 | 6753484                                                                                                              | N-Term(iTRAQ4plex)                                                                  | 1401.67522 | 66 | 65  |      | 5.05 | Expt2 |
| VENNDADYPWPR                     | 25  | 188219537                                                                                                            | N-Term(iTRAQ4plex)                                                                  | 1619.75859 | 66 | 61  |      | 4.87 | Expt2 |
| IYGGSVTGATCK                     | 3   | 226958349                                                                                                            | N-Term(iTRAQ4plex), C12(Methylthio), K13(iTRAQ4plex)                                | 1603.84258 | 66 | 57  |      | 4.20 | Expt2 |
| LOSEIEMAETET                     | 9   | 112421039                                                                                                            | N-Term(iTRAQ4plex)                                                                  | 1622.82158 | 66 | 74  |      | 5.39 | Expt2 |
| AEVGVPAEFGIWTR                   | 3   | 125347376                                                                                                            | N-Term(iTRAQ4plex)                                                                  | 1675.89495 | 66 | 58  |      | 3.80 | Expt2 |
| GDVTTQVALOPALK                   | 4   | 31980762                                                                                                             | N-Term(iTRAQ4plex), K14(iTRAQ4plex)                                                 | 1729.01274 | 66 | 68  |      | 4.77 | Expt2 |
| AANEAGYFNEMAPIEVK                | 4   | 29126205                                                                                                             | N-Term(iTRAQ4plex), K18(iTRAQ4plex)                                                 | 2271.12261 | 66 | 92  |      | 5.19 | Expt2 |
| VAVSADPNVPIVTR                   | 14  | 31982030                                                                                                             | N-Term(iTRAQ4plex)                                                                  | 1795.02170 | 66 | 66  |      | 4.86 | Expt2 |
| FYEAELEELDFQGATEESR              | 15  | 6678097:255759941                                                                                                    | N-Term(iTRAQ4plex)                                                                  | 2407.10796 | 66 | 114 |      | 6.42 | Expt2 |
| GPVYIGELPQDFLR                   | 6   | 13591860                                                                                                             | N-Term(iTRAQ4plex)                                                                  | 1747.95622 | 66 | 54  |      | 4.10 | Expt2 |
| CTGGVEGATSALPK                   | 8   | 94390243:82995066:82994754:160333553                                                                                 | N-Term(iTRAQ4plex), C1(Methylthio), K15(iTRAQ4plex)                                 | 1695.86528 | 66 | 95  | 1.24 | 4.64 | Expt2 |
| TNQEQEIMR                        | 18  | 149260099:6996913                                                                                                    | N-Term(iTRAQ4plex)                                                                  | 1388.72563 | 66 | 59  |      | 4.27 | Expt2 |
| EEDSEELLWR                       | 14  | 33469047                                                                                                             | N-Term(iTRAQ4plex)                                                                  | 1536.73015 | 66 | 48  |      | 4.48 | Expt2 |
| AIGAVPLIQGEYMIPECK               | 8   | 6753556                                                                                                              | N-Term(iTRAQ4plex), C16(Methylthio), K18(iTRAQ4plex)                                | 2266.19071 | 66 | 55  | 1.49 | 5.53 | Expt2 |
| DSTLIMOLLR                       | 83  | 226874906:31543976:149251472:149263879:134023662:6756037:6756041:6756039:31543974                                    | N-Term(iTRAQ4plex)                                                                  | 1333.76457 | 66 | 65  |      | 4.03 | Expt2 |
| LLAVAATAPPDAPNREEVFDER           | 2   | 31543942                                                                                                             | N-Term(iTRAQ4plex)                                                                  | 2525.31736 | 66 | 36  |      |      | Expt2 |
| LLILADMADVYK                     | 6   | 6753294                                                                                                              | N-Term(iTRAQ4plex), K12(iTRAQ4plex)                                                 | 1652.95891 | 66 | 102 |      | 4.83 | Expt2 |
| DASSYLMMEHVSGLSDLSFGAAPAOPMSSEER | 2   | 7305121                                                                                                              | N-Term(iTRAQ4plex), M31(Oxidation)                                                  | 3944.76186 | 66 |     |      | 4.55 | Expt2 |
| FSCMCPQGEVVR                     | 13  | 149261823:164607147                                                                                                  | N-Term(iTRAQ4plex), C3(Methylthio), C5(Methylthio)                                  | 1754.73601 | 66 | 50  |      | 4.44 | Expt2 |
| ALOTILSOPVTYEAYR                 | 13  | 23943828                                                                                                             | N-Term(iTRAQ4plex)                                                                  | 1997.08609 | 66 | 74  |      | 4.79 | Expt2 |
| AVEYLLMGIPIGDR                   | 6   | 171906578                                                                                                            | N-Term(iTRAQ4plex)                                                                  | 1577.85076 | 66 | 67  |      | 4.38 | Expt2 |
| DOVLQNLGVSSEYSEEK                | 3   | 157823695:157823731:157823795:157823761                                                                              | N-Term(iTRAQ4plex), K17(iTRAQ4plex)                                                 | 2213.12015 | 66 | 63  |      | 5.12 | Expt2 |
| EVNEVIQNPATITR                   | 3   | 163954953                                                                                                            | N-Term(iTRAQ4plex)                                                                  | 1727.94072 | 66 | 91  |      | 3.89 | Expt2 |
| LAGFLDLTEQEFR                    | 6   | 51093840                                                                                                             | N-Term(iTRAQ4plex)                                                                  | 1682.89092 | 66 | 69  |      | 4.82 | Expt2 |
| EADIDGGQVNVYEEFVQMMTAK           | 4   | 6753244                                                                                                              | N-Term(iTRAQ4plex), M18(Oxidation), M19(Oxidation), K22(iTRAQ4plex)                 | 2810.28440 | 66 | 95  |      | 7.34 | Expt2 |
| EANIDGGQVNVYEEFVQMMTAK           | 5   | 149255253:149255689                                                                                                  | N-Term(iTRAQ4plex), N3(Deamidated), M18(Oxidation), M19(Oxidation), K22(iTRAQ4plex) | 2810.28440 | 66 | 95  |      | 7.34 | Expt2 |
| GADQEPLNWFIFER                   | 13  | 133778947                                                                                                            | N-Term(iTRAQ4plex)                                                                  | 1865.93205 | 66 | 81  |      | 5.22 | Expt2 |
| ITSPLMPESSIEK                    | 11  | 7106387:94388526:94388799                                                                                            | N-Term(iTRAQ4plex), K13(iTRAQ4plex)                                                 | 1719.95366 | 66 | 95  |      | 3.97 | Expt2 |
| LQLQQLGLVPR                      | 3   | 169646258                                                                                                            | N-Term(iTRAQ4plex)                                                                  | 1408.87712 | 66 | 65  |      | 4.50 | Expt2 |
| LASQANIAQVLAELK                  | 9   | 78711838:21313640:88853578                                                                                           | N-Term(iTRAQ4plex), K15(iTRAQ4plex)                                                 | 1857.11313 | 66 | 58  |      | 5.26 | Expt2 |
| EYATEVDVDFVR                     | 9   | 78711838:21313640:88853578                                                                                           | N-Term(iTRAQ4plex)                                                                  | 1586.78691 | 66 | 70  |      | 5.00 | Expt2 |
| IQLVEEELDR                       | 22  | 40254525:31560030:11875203:256000780:256000786:256000790:256000792:256000796:256000782:256000788:256000794:256000784 | N-Term(iTRAQ4plex)                                                                  | 1387.75554 | 66 | 59  |      | 4.27 | Expt2 |
| ATEIGGILVNTPEDPNLSK              | 5   | 31982393                                                                                                             | N-Term(iTRAQ4plex), K19(iTRAQ4plex)                                                 | 2256.23618 | 66 | 73  |      | 5.26 | Expt2 |
| DLLTAYYDVEDYK                    | 20  | 112293264                                                                                                            | N-Term(iTRAQ4plex), K13(iTRAQ4plex)                                                 | 1895.95574 | 66 | 68  | 1.23 | 4.30 | Expt2 |
| DITSDTSGDFR                      | 34  | 124517663                                                                                                            | N-Term(iTRAQ4plex)                                                                  | 1357.63555 | 66 | 67  |      | 4.57 | Expt2 |
| TPCQOELDQVLER                    | 8   | 31982260                                                                                                             | N-Term(iTRAQ4plex), C3(Methylthio)                                                  | 1748.84636 | 65 | 80  |      | 4.51 | Expt2 |
| ALTVPELQOQMDAK                   | 13  | 31981939:22165384:149253488:149253527:83030206:27754056:12963615                                                     | N-Term(iTRAQ4plex), M11(Oxidation), K15(iTRAQ4plex)                                 | 1996.07114 | 65 | 65  | 1.15 | 5.38 | Expt2 |
| LTWHSCEPEAQ                      | 2   | 108860695:82913885:82950935:82950919:38074891:82951729:83014973                                                      | N-Term(iTRAQ4plex), C6(Methylthio)                                                  | 1605.67912 | 65 | 38  |      |      | Expt2 |

|                        |    |                                                                                                                                                                                    |                                                                    |            |    |     |      |      |       |
|------------------------|----|------------------------------------------------------------------------------------------------------------------------------------------------------------------------------------|--------------------------------------------------------------------|------------|----|-----|------|------|-------|
| WGTLTDCVVMR            | 19 | 82801284;94371439;149252089;82918363;82918359;82954743;149266199;82954739;149266543;149266545;82956957;51769129;149266569;82957137;94400765;149268214;149268216;37674277;157277969 | N-Term(iTRAQ4plex), C7(Methylthio)                                 | 1470.70378 | 65 | 59  |      | 4.71 | Expt2 |
| ALSNLESIPGGYNLR        | 7  | 22726191                                                                                                                                                                           | N-Term(iTRAQ4plex)                                                 | 1818.98625 | 65 | 75  |      | 4.83 | Expt2 |
| TALINSTGEEVAMR         | 9  | 9506843;162287370;161760667                                                                                                                                                        | N-Term(iTRAQ4plex)                                                 | 1635.84746 | 65 | 71  |      | 5.04 | Expt2 |
| VVYWTIDSEISIGR         | 6  | 171543883                                                                                                                                                                          | N-Term(iTRAQ4plex)                                                 | 1765.93096 | 65 | 70  |      | 4.20 | Expt2 |
| VGINDFCPMGFVK          | 25 | 20137008                                                                                                                                                                           | N-Term(iTRAQ4plex), C7(Methylthio), M9(Oxidation), K14(iTRAQ4plex) | 1833.90141 | 65 | 91  |      | 4.67 | Expt2 |
| ALLOAILQTEDMLK         | 5  | 82950147;82950149;149264086                                                                                                                                                        | N-Term(iTRAQ4plex), M12(Oxidation), K14(iTRAQ4plex)                | 1891.08414 | 65 | 69  |      | 5.12 | Expt2 |
| VFSGVSTGLK             | 3  | 149253258;33859482                                                                                                                                                                 | N-Term(iTRAQ4plex), K11(iTRAQ4plex)                                | 1381.83489 | 65 | 72  |      | 4.17 | Expt2 |
| EVLVQVDEER             | 9  | 29336026                                                                                                                                                                           | N-Term(iTRAQ4plex)                                                 | 1359.72392 | 65 | 59  |      | 3.86 | Expt2 |
| TEQGPSSEYIFER          | 3  | 8393866                                                                                                                                                                            | N-Term(iTRAQ4plex)                                                 | 1783.86357 | 65 | 71  |      | 4.67 | Expt2 |
| FIPLSEPAVPVPIPIPEOQLAR | 10 | 114158691                                                                                                                                                                          | N-Term(iTRAQ4plex)                                                 | 2457.36948 | 65 | 53  |      | 4.65 | Expt2 |
| TALVANTSMPVAAR         | 2  | 31560731                                                                                                                                                                           | N-Term(iTRAQ4plex), M10(Oxidation)                                 | 1675.89714 | 65 | 78  |      |      | Expt2 |
| SFGPAVVMNR             | 44 | 149267092;6857757                                                                                                                                                                  | N-Term(iTRAQ4plex)                                                 | 1221.65398 | 65 | 64  |      | 4.15 | Expt2 |
| VVLEIDNAR              | 23 | 226823220                                                                                                                                                                          | N-Term(iTRAQ4plex)                                                 | 1172.67632 | 65 | 46  |      | 3.45 | Expt2 |
| MYDSVLALPQALQATR       | 10 | 8393144                                                                                                                                                                            | N-Term(iTRAQ4plex), M1(Oxidation)                                  | 1865.99687 | 65 | 71  |      | 4.08 | Expt2 |
| NLTNPNTVILIGNK         | 6  | 18390323                                                                                                                                                                           | N-Term(iTRAQ4plex), K15(iTRAQ4plex)                                | 1912.15226 | 65 | 48  |      | 5.20 | Expt2 |
| EFGSLPTTPEOR           | 3  | 31560462                                                                                                                                                                           | N-Term(iTRAQ4plex)                                                 | 1592.80315 | 65 | 54  |      | 4.87 | Expt2 |
| LAQQTATGVVNIIDEVPEGR   | 3  | 113195686                                                                                                                                                                          | N-Term(iTRAQ4plex)                                                 | 2355.23728 | 65 | 70  |      | 4.98 | Expt2 |
| LFPDTPLALEANK          | 4  | 111607430;111607434;111607432;111607436                                                                                                                                            | N-Term(iTRAQ4plex), K13(iTRAQ4plex)                                | 1716.98125 | 65 | 69  |      | 3.42 | Expt2 |
| AVGVVAGGGR             | 12 | 6755358                                                                                                                                                                            | N-Term(iTRAQ4plex)                                                 | 1085.65495 | 65 | 63  |      | 3.80 | Expt2 |
| DAVLLVFANK             | 30 | 6680722;6680718;6680716;149254976                                                                                                                                                  | N-Term(iTRAQ4plex), K10(iTRAQ4plex)                                | 1377.84062 | 65 | 77  | 1.41 | 4.08 | Expt2 |
| GFGVTFENIDDAK          | 6  | 6680946                                                                                                                                                                            | N-Term(iTRAQ4plex), K14(iTRAQ4plex)                                | 1847.94651 | 65 | 56  | 1.01 | 3.86 | Expt2 |
| EQWSNCPITIGQIR         | 12 | 6681079                                                                                                                                                                            | N-Term(iTRAQ4plex), C6(Methylthio)                                 | 1721.82182 | 65 | 63  |      | 4.53 | Expt2 |
| TGGLDLPSPSGTSLK        | 12 | 125490382                                                                                                                                                                          | N-Term(iTRAQ4plex), K16(iTRAQ4plex)                                | 1815.01689 | 65 | 85  |      | 4.27 | Expt2 |
| IAQDLEMYGINYFEIK       | 3  | 149266483                                                                                                                                                                          | N-Term(iTRAQ4plex), M7(Oxidation), K16(iTRAQ4plex)                 | 2251.16251 | 65 | 59  |      | 4.35 | Expt2 |
| VLOPVEGEVILFK          | 6  | 31791059                                                                                                                                                                           | N-Term(iTRAQ4plex), K14(iTRAQ4plex)                                | 1830.10178 | 65 | 53  |      | 4.66 | Expt2 |
| LVLANNCPALR            | 32 | 149263482;82890078;149251558;94408110                                                                                                                                              | N-Term(iTRAQ4plex), C8(Methylthio)                                 | 1486.83588 | 65 | 64  | 1.83 | 4.91 | Expt2 |
| DFAPGSQLPILLYDGDVK     | 6  | 27229085                                                                                                                                                                           | N-Term(iTRAQ4plex), K18(iTRAQ4plex)                                | 2236.21689 | 65 | 53  |      | 5.17 | Expt2 |
| SLPVNDSVLDFER          | 4  | 58037159                                                                                                                                                                           | N-Term(iTRAQ4plex)                                                 | 1733.92815 | 65 | 69  |      | 3.77 | Expt2 |
| ISMPTDIDLNLK           | 10 | 61743961                                                                                                                                                                           | N-Term(iTRAQ4plex), M3(Oxidation), K11(iTRAQ4plex)                 | 1562.87688 | 65 | 57  |      | 3.61 | Expt2 |
| ISMPTDLNINLNLK         | 11 | 61743961                                                                                                                                                                           | N-Term(iTRAQ4plex), M3(Oxidation), N7(Deamidated), K11(iTRAQ4plex) | 1562.87688 | 65 | 57  |      | 3.61 | Expt2 |
| LAAGDQLLSVDGR          | 5  | 145587092                                                                                                                                                                          | N-Term(iTRAQ4plex)                                                 | 1458.80290 | 65 | 75  |      | 4.79 | Expt2 |
| YPVNSVNILK             | 3  | 110625624                                                                                                                                                                          | N-Term(iTRAQ4plex), K10(iTRAQ4plex)                                | 1434.86333 | 65 | 67  |      | 3.66 | Expt2 |
| EDLTAAMLIVK            | 32 | 148277039                                                                                                                                                                          | N-Term(iTRAQ4plex), M7(Oxidation), K11(iTRAQ4plex)                 | 1507.86748 | 65 | 63  |      | 4.12 | Expt2 |
| APSFVSAPQVSIPIVNVNLIK  | 8  | 61743961                                                                                                                                                                           | N-Term(iTRAQ4plex), K21(iTRAQ4plex)                                | 2457.35625 | 65 | 77  |      | 6.42 | Expt2 |
| EELLEEIKDI             | 3  | 7106387;94388526;94388799                                                                                                                                                          | N-Term(iTRAQ4plex), K8(iTRAQ4plex)                                 | 1504.84526 | 65 | 34  |      | 3.73 | Expt2 |
| GFGVFLFK               | 5  | 51776221;116256518;116256514;116256516;148664250;116256512                                                                                                                         | N-Term(iTRAQ4plex), K8(iTRAQ4plex)                                 | 1202.71794 | 65 | 54  |      | 3.46 | Expt2 |
| OSGQCLDIDECR           | 18 | 6753824                                                                                                                                                                            | N-Term(iTRAQ4plex), C5(Methylthio), C11(Methylthio)                | 1602.65203 | 65 | 68  |      | 5.08 | Expt2 |
| STPEDQILYQTER          | 5  | 188497650                                                                                                                                                                          | N-Term(iTRAQ4plex)                                                 | 1723.86199 | 65 | 68  |      | 4.70 | Expt2 |
| YGFIEGNVVIPIR          | 19 | 85540471;85540466;85540468                                                                                                                                                         | N-Term(iTRAQ4plex)                                                 | 1507.84046 | 65 | 73  |      | 4.49 | Expt2 |
| LOVSNVLSQPLAQAVK       | 6  | 34996495                                                                                                                                                                           | N-Term(iTRAQ4plex), K17(iTRAQ4plex)                                | 2054.23130 | 65 | 64  |      | 5.22 | Expt2 |
| GYLQPEQLPDCLK          | 18 | 31982186                                                                                                                                                                           | N-Term(iTRAQ4plex), C11(Methylthio), K13(iTRAQ4plex)               | 1766.90630 | 65 | 69  |      | 4.31 | Expt2 |
| AIWNVINWENVTER         | 5  | 31980762                                                                                                                                                                           | N-Term(iTRAQ4plex)                                                 | 1887.98296 | 65 | 69  |      | 5.19 | Expt2 |
| DYTYEELLNR             | 7  | 149258752;14149756                                                                                                                                                                 | N-Term(iTRAQ4plex)                                                 | 1459.71868 | 65 | 46  |      | 4.42 | Expt2 |
| VNVEAPNVNMEGLGK        | 3  | 61743961                                                                                                                                                                           | N-Term(iTRAQ4plex), K16(iTRAQ4plex)                                | 1916.01706 | 65 | 64  |      | 4.78 | Expt2 |
| CSNNGLVAGFQSR          | 37 | 9789943                                                                                                                                                                            | N-Term(iTRAQ4plex), C1(Methylthio), N4(Deamidated)                 | 1543.71111 | 65 | 77  |      | 4.82 | Expt2 |
| ISMQDVLDSLGSCK         | 9  | 61743961                                                                                                                                                                           | N-Term(iTRAQ4plex), C13(Methylthio), K14(iTRAQ4plex)               | 1829.90813 | 65 | 102 |      | 5.10 | Expt2 |
| WEOGQADYMGADSFDNK      | 5  | 7305121                                                                                                                                                                            | N-Term(iTRAQ4plex), M9(Oxidation), K18(iTRAQ4plex)                 | 2379.08127 | 65 | 43  |      | 5.43 | Expt2 |
| FDEILEASDGMIMVAR       | 8  | 31981562                                                                                                                                                                           | N-Term(iTRAQ4plex)                                                 | 1809.92099 | 65 | 75  | 1.22 | 3.94 | Expt2 |
| TVIDYNGER              | 3  | 42415475                                                                                                                                                                           | N-Term(iTRAQ4plex), N6(Deamidated)                                 | 1211.60356 | 65 | 43  |      | 3.92 | Expt2 |



|                            |    |                                                                                               |                                                                      |            |    |     |      |       |       |
|----------------------------|----|-----------------------------------------------------------------------------------------------|----------------------------------------------------------------------|------------|----|-----|------|-------|-------|
| GTQGVVTFEIFR               | 8  | 29789343                                                                                      | N-Term(ITRAQ4plex)                                                   | 1611.86260 | 65 | 70  | 5.10 | Expt2 |       |
| LEICNLTPDILTCDSEYK         | 3  | 157951598                                                                                     | N-Term(ITRAQ4plex), C4(Methylthio), C13(Methylthio), K17(ITRAQ4plex) | 2309.08170 | 65 | 66  | 5.11 | Expt2 |       |
| LTITSNPEMTFPGER            | 3  | 227908790                                                                                     | N-Term(ITRAQ4plex)                                                   | 1836.93413 | 65 | 70  | 4.47 | Expt2 |       |
| FEIWDTAGOER                | 15 | 28916687;149249575;113866024;13385374                                                         | N-Term(ITRAQ4plex)                                                   | 1495.72820 | 65 | 43  | 3.95 | Expt2 |       |
| MLSPQLTIFR                 | 9  | 225543183                                                                                     | N-Term(ITRAQ4plex)                                                   | 1478.81621 | 64 | 47  | 4.26 | Expt2 |       |
| TPLSEAFEEIMNR              | 4  | 62909983                                                                                      | N-Term(ITRAQ4plex)                                                   | 1809.88579 | 64 | 87  | 4.01 | Expt2 |       |
| TDDYLDQPCCEITNR            | 9  | 116089273                                                                                     | N-Term(ITRAQ4plex), C9(Methylthio), C10(Methylthio)                  | 2021.81658 | 64 | 77  | 4.59 | Expt2 |       |
| SETITEELVGLMKNK            | 9  | 51830180;82975294;113680352                                                                   | N-Term(ITRAQ4plex), K15(ITRAQ4plex)                                  | 1981.04436 | 64 | 78  | 4.47 | Expt2 |       |
| IPTQPNAPFPNFMQTIQTVDVR     | 6  | 226423935                                                                                     | N-Term(ITRAQ4plex)                                                   | 2660.37082 | 64 | 68  | 6.47 | Expt2 |       |
| VGFEVATDLDTGR              | 18 | 169234958;32129201                                                                            | N-Term(ITRAQ4plex)                                                   | 1523.78569 | 64 | 76  | 0.98 | 4.72  | Expt2 |
| FVIGPGQDAGLTGR             | 7  | 21704144                                                                                      | N-Term(ITRAQ4plex)                                                   | 1588.85857 | 64 | 79  | 4.60 | Expt2 |       |
| NITNELQIEPEK               | 12 | 112421039                                                                                     | N-Term(ITRAQ4plex), K13(ITRAQ4plex)                                  | 1829.03191 | 64 | 73  | 5.03 | Expt2 |       |
| GLVAVVTGGASGLGLATAK        | 4  | 61888838                                                                                      | N-Term(ITRAQ4plex), K19(ITRAQ4plex)                                  | 1930.16581 | 64 | 84  | 5.47 | Expt2 |       |
| TAVVVGTVTDDVDR             | 47 | 83699424                                                                                      | N-Term(ITRAQ4plex)                                                   | 1475.81963 | 64 | 85  | 4.66 | Expt2 |       |
| ISYSSGGGSFR                | 54 | 20911031                                                                                      | N-Term(ITRAQ4plex)                                                   | 1261.62915 | 64 | 75  | 4.49 | Expt2 |       |
| YDGOVAVFGSDFQEK            | 8  | 6678483                                                                                       | N-Term(ITRAQ4plex), K15(ITRAQ4plex)                                  | 1977.98247 | 64 | 70  | 5.25 | Expt2 |       |
| VAPGYTYVTAEQDAR            | 5  | 110735428;110735426                                                                           | N-Term(ITRAQ4plex)                                                   | 1784.89531 | 64 | 91  | 4.04 | Expt2 |       |
| AFFNSLVELIR                | 8  | 167736365                                                                                     | N-Term(ITRAQ4plex)                                                   | 1539.86614 | 64 | 77  | 4.81 | Expt2 |       |
| DGGIPADPNINFLSTGASDAIVTMLK | 3  | 33413404                                                                                      | N-Term(ITRAQ4plex), K26(ITRAQ4plex)                                  | 2905.53128 | 64 | 72  | 5.71 | Expt2 |       |
| LDIDSAPITAR                | 49 | 31981562                                                                                      | N-Term(ITRAQ4plex)                                                   | 1315.73747 | 64 | 65  | 4.11 | Expt2 |       |
| ALELEQELR                  | 5  | 33413404                                                                                      | N-Term(ITRAQ4plex)                                                   | 1244.69280 | 64 | 54  | 3.41 | Expt2 |       |
| GFEVVMTEPIDEYCVQQLK        | 4  | 40556608                                                                                      | N-Term(ITRAQ4plex), M7(Oxidation), C15(Methylthio), K20(ITRAQ4plex)  | 2741.31845 | 64 | 64  | 4.93 | Expt2 |       |
| LDLDTSDSOPPVFK             | 10 | 170295840                                                                                     | N-Term(ITRAQ4plex), K15(ITRAQ4plex)                                  | 1963.06821 | 64 | 57  | 4.29 | Expt2 |       |
| QVCEQLISQGMSR              | 26 | 111074529                                                                                     | N-Term(ITRAQ4plex), C3(Methylthio), M11(Oxidation)                   | 1684.79350 | 64 | 57  | 4.78 | Expt2 |       |
| AEQDAFIHGPOLSYLR           | 7  | 6680554                                                                                       | N-Term(ITRAQ4plex)                                                   | 1989.03257 | 64 | 40  | 4.47 | Expt2 |       |
| DLELLASGVDR                | 8  | 126518317                                                                                     | N-Term(ITRAQ4plex)                                                   | 1331.73015 | 64 | 49  | 4.25 | Expt2 |       |
| GLQGSFEELCR                | 4  | 31560705                                                                                      | N-Term(ITRAQ4plex), C10(Methylthio)                                  | 1428.67473 | 64 | 58  | 4.53 | Expt2 |       |
| VMGNQVFPEVTR               | 20 | 9790161                                                                                       | N-Term(ITRAQ4plex)                                                   | 1520.80193 | 64 | 59  | 4.83 | Expt2 |       |
| MATEVAADALGEEWK            | 8  | 94367038;82885362;149258986;149265796;149271678                                               | N-Term(ITRAQ4plex), K15(ITRAQ4plex)                                  | 1908.96732 | 64 | 51  | 5.48 | Expt2 |       |
| TAGWNIPMGMLYNR             | 15 | 20330802                                                                                      | N-Term(ITRAQ4plex)                                                   | 1767.88274 | 64 | 48  | 4.53 | Expt2 |       |
| SPVISIEPPSSTVQQGDASF       | 6  | 149253040;183979966                                                                           | N-Term(ITRAQ4plex), K22(ITRAQ4plex)                                  | 2590.35454 | 64 | 88  | 5.34 | Expt2 |       |
| EIEFEDGLEALR               | 6  | 226062635                                                                                     | N-Term(ITRAQ4plex)                                                   | 1564.79985 | 64 | 75  | 4.01 | Expt2 |       |
| EFEEDLTGIDDR               | 10 | 149260240                                                                                     | N-Term(ITRAQ4plex)                                                   | 1582.73918 | 64 | 65  | 5.17 | Expt2 |       |
| MGPSGGEGVEPER              | 3  | 6754508                                                                                       | N-Term(ITRAQ4plex)                                                   | 1445.68193 | 64 | 48  | 4.47 | Expt2 |       |
| SPDTNYLFGMDYVDR            | 6  | 8394024;149258657;9506983                                                                     | N-Term(ITRAQ4plex), M9(Oxidation)                                    | 1952.87883 | 64 | 62  |      | Expt2 |       |
| FLVGPDPGIPVMR              | 6  | 171543846;145275179;15011841                                                                  | N-Term(ITRAQ4plex)                                                   | 1444.81291 | 64 | 68  | 3.68 | Expt2 |       |
| VVGAMQLYSVDR               | 9  | 51491845                                                                                      | N-Term(ITRAQ4plex)                                                   | 1481.79143 | 64 | 46  | 4.64 | Expt2 |       |
| DVDAAYMKN                  | 15 | 20911031;54607171;47523977;269914154                                                          | N-Term(ITRAQ4plex), K9(ITRAQ4plex)                                   | 1314.66521 | 64 | 63  | 4.21 | Expt2 |       |
| VPYFIDLK                   | 2  | 159110817                                                                                     | N-Term(ITRAQ4plex), K8(ITRAQ4plex)                                   | 1282.76982 | 64 | 61  |      | Expt2 |       |
| EIAEAYLGK                  | 4  | 31981690                                                                                      | N-Term(ITRAQ4plex), K9(ITRAQ4plex)                                   | 1281.73833 | 64 | 56  |      | Expt2 |       |
| AVPQLQGYLR                 | 20 | 82880886;149261044;94405982;149270558;149270560;84662736                                      | N-Term(ITRAQ4plex)                                                   | 1288.74993 | 64 | 55  | 3.89 | Expt2 |       |
| LVLCEVFK                   | 8  | 149269782;31982332                                                                            | N-Term(ITRAQ4plex), C4(Methylthio), K8(ITRAQ4plex)                   | 1284.73284 | 64 | 54  | 3.53 | Expt2 |       |
| VVFMISLCK                  | 2  | 33469047                                                                                      | N-Term(ITRAQ4plex), C7(Methylthio), K8(ITRAQ4plex)                   | 1260.68974 | 64 | 53  |      | Expt2 |       |
| VVFDITYDR                  | 31 | 31982861                                                                                      | N-Term(ITRAQ4plex)                                                   | 1273.61785 | 64 | 51  | 3.82 | Expt2 |       |
| VTLPAGPDILR                | 16 | 30725780                                                                                      | N-Term(ITRAQ4plex)                                                   | 1295.78288 | 64 | 50  | 4.39 | Expt2 |       |
| VVFIKPPDK                  | 2  | 6671549                                                                                       | N-Term(ITRAQ4plex), K9(ITRAQ4plex)                                   | 1309.78179 | 64 | 47  |      | Expt2 |       |
| QLSALADQOGR                | 3  | 111185907                                                                                     | N-Term(ITRAQ4plex)                                                   | 1330.72234 | 64 | 59  | 4.15 | Expt2 |       |
| GGSVQVLEDQELTCQPELVK       | 3  | 149251616;9507079                                                                             | N-Term(ITRAQ4plex), C14(Methylthio), K22(ITRAQ4plex)                 | 2702.40451 | 64 | 58  | 5.62 | Expt2 |       |
| YPMVAVGLNK                 | 2  | 149262233;149249185;82894566;82898629;149255394;82922589;94385943;149262863;94398900;82958658 | N-Term(ITRAQ4plex), K9(ITRAQ4plex)                                   | 1280.73528 | 64 | 61  |      | Expt2 |       |
| FLMANGOLVK                 | 9  | 116089273;33859560                                                                            | N-Term(ITRAQ4plex), N5(Deamidated), K10(ITRAQ4plex)                  | 1409.81316 | 64 | 64  | 4.22 | Expt2 |       |
| DDTESLEIFONEVAR            | 13 | 19072792                                                                                      | N-Term(ITRAQ4plex)                                                   | 1909.92851 | 64 | 106 | 1.14 | 4.88  | Expt2 |

|                       |    |                                                                                   |                                                     |            |    |     |      |       |       |
|-----------------------|----|-----------------------------------------------------------------------------------|-----------------------------------------------------|------------|----|-----|------|-------|-------|
| AYDLVVDWVPTLVR        | 3  | 58037109                                                                          | N-Term(ITRAQ4plex)                                  | 1790.00383 | 64 | 54  | 4.80 | Expt2 |       |
| IGPYOPNVVPGIDYVIPK    | 4  | 25141233                                                                          | N-Term(ITRAQ4plex), K18(ITRAQ4plex)                 | 2257.28958 | 64 | 49  | 4.35 | Expt2 |       |
| DDGSWEVIEGYR          | 3  | 6680027                                                                           | N-Term(ITRAQ4plex)                                  | 1569.72759 | 64 | 47  | 4.21 | Expt2 |       |
| TVLDPVTGDLSLDR        | 3  | 19527174                                                                          | N-Term(ITRAQ4plex)                                  | 1632.85698 | 64 | 62  | 3.82 | Expt2 |       |
| TIEVLQPNPASR          | 9  | 31560792:7305485                                                                  | N-Term(ITRAQ4plex)                                  | 1532.81902 | 64 | 48  | 4.43 | Expt2 |       |
| AVAQALEVIPR           | 22 | 6753320                                                                           | N-Term(ITRAQ4plex)                                  | 1310.79265 | 64 | 70  | 4.54 | Expt2 |       |
| EVSDGIVAPGYEEALK      | 6  | 149234067                                                                         | N-Term(ITRAQ4plex), K17(ITRAQ4plex)                 | 2094.09136 | 64 | 69  | 4.93 | Expt2 |       |
| SYSSGGEDGYVR          | 3  | 9055370                                                                           | N-Term(ITRAQ4plex)                                  | 1420.64714 | 64 | 57  | 4.64 | Expt2 |       |
| AAPFVECOGR            | 8  | 34328045                                                                          | N-Term(ITRAQ4plex), C7(Methylthio)                  | 1267.60527 | 64 | 45  | 3.44 | Expt2 |       |
| GMNTLVGVDLVPEPK       | 13 | 112181182                                                                         | N-Term(ITRAQ4plex), K15(ITRAQ4plex)                 | 1921.03667 | 64 | 73  | 0.99 | 3.82  | Expt2 |
| LFDQAFGVPR            | 43 | 158937312                                                                         | N-Term(ITRAQ4plex)                                  | 1293.70947 | 64 | 67  | 3.90 | Expt2 |       |
| SLSQOINER             | 8  | 34328108                                                                          | N-Term(ITRAQ4plex)                                  | 1331.74175 | 64 | 60  | 4.20 | Expt2 |       |
| DSYVGDEAOSK           | 3  | 6671509:6752954:6671507:157823889:14192922:33563240                               | N-Term(ITRAQ4plex), K11(ITRAQ4plex)                 | 1486.73039 | 64 | 72  | 4.49 | Expt2 |       |
| YLAEFATGDR            | 37 | 226874906                                                                         | N-Term(ITRAQ4plex)                                  | 1400.69219 | 63 | 55  | 4.03 | Expt2 |       |
| VLITTDLLAR            | 24 | 176865892:21450625:176866061:226823309:176865998                                  | N-Term(ITRAQ4plex)                                  | 1258.78496 | 63 | 54  | 3.51 | Expt2 |       |
| VGVPTETGALTLNR        | 18 | 29126205                                                                          | N-Term(ITRAQ4plex)                                  | 1571.88799 | 63 | 77  | 5.08 | Expt2 |       |
| GTCWQTVIDGR           | 8  | 118197277                                                                         | N-Term(ITRAQ4plex), C3(Methylthio)                  | 1425.67595 | 63 | 69  | 4.19 | Expt2 |       |
| ADDTFEALR             | 3  | 13385800                                                                          | N-Term(ITRAQ4plex)                                  | 1181.59258 | 63 | 49  | 3.87 | Expt2 |       |
| DGLGGLPDIVR           | 12 | 7305619                                                                           | N-Term(ITRAQ4plex)                                  | 1255.71306 | 63 | 57  | 4.13 | Expt2 |       |
| LFCVGF TK             | 5  | 149265827                                                                         | N-Term(ITRAQ4plex), C3(Methylthio), K8(ITRAQ4plex)  | 1248.67204 | 63 | 44  | 4.20 | Expt2 |       |
| GLFIDDK               | 4  | 94400195:149267887:7948999:6754976                                                | N-Term(ITRAQ4plex), K8(ITRAQ4plex)                  | 1208.71758 | 63 | 46  | 3.72 | Expt2 |       |
| DLNCVPEADTLGAVAK      | 3  | 188528624                                                                         | N-Term(ITRAQ4plex), C4(Methylthio), K17(ITRAQ4plex) | 2063.07932 | 63 | 51  | 4.10 | Expt2 |       |
| ESIIVDEGVVR           | 8  | 211065507                                                                         | N-Term(ITRAQ4plex)                                  | 1359.76482 | 63 | 60  | 4.19 | Expt2 |       |
| VPNNLPIPER            | 23 | 160707889                                                                         | N-Term(ITRAQ4plex)                                  | 1406.78789 | 63 | 56  | 3.78 | Expt2 |       |
| NLLSVAYK              | 16 | 226874906:31543976:149263879:149269348:134023662:6756037:6756041:6756039:31543974 | N-Term(ITRAQ4plex), K8(ITRAQ4plex)                  | 1195.73943 | 63 | 67  | 3.58 | Expt2 |       |
| VCTLAIIDPGSDIIR       | 16 | 149263482:82890078:149251558:149260929:82952096:94408110                          | N-Term(ITRAQ4plex), C2(Methylthio)                  | 1890.98381 | 63 | 86  | 4.73 | Expt2 |       |
| LDANIPEVAVEGPEGK      | 9  | 61743961                                                                          | N-Term(ITRAQ4plex), K16(ITRAQ4plex)                 | 1926.04685 | 63 | 54  | 5.90 | Expt2 |       |
| IOEYNLLDLSR           | 5  | 63999380                                                                          | N-Term(ITRAQ4plex)                                  | 1707.94609 | 63 | 59  | 4.89 | Expt2 |       |
| VNADEVGGEALGR         | 7  | 31982300                                                                          | N-Term(ITRAQ4plex)                                  | 1430.73747 | 63 | 79  | 4.35 | Expt2 |       |
| SSEIEAVOSLDR          | 7  | 21312654                                                                          | N-Term(ITRAQ4plex)                                  | 1605.81963 | 63 | 57  | 4.46 | Expt2 |       |
| YELGGLAVLR            | 8  | 149253040:183979966                                                               | N-Term(ITRAQ4plex)                                  | 1321.76067 | 63 | 71  | 3.61 | Expt2 |       |
| TLPVVDFSPR            | 7  | 156938252:156938255                                                               | N-Term(ITRAQ4plex)                                  | 1274.72661 | 63 | 67  | 4.20 | Expt2 |       |
| FQSSMSYGGFGAGSCQLGGGR | 7  | 6754480                                                                           | N-Term(ITRAQ4plex), C17(Methylthio)                 | 2388.03203 | 63 | 114 | 7.73 | Expt2 |       |
| IEVIEIMTDR            | 23 | 6754220:63652391:82951294:85060507:260304980                                      | N-Term(ITRAQ4plex)                                  | 1362.74492 | 63 | 53  | 4.09 | Expt2 |       |
| CIESLIAVFOK           | 15 | 94404308:21886811                                                                 | N-Term(ITRAQ4plex), C1(Methylthio), K11(ITRAQ4plex) | 1584.87082 | 63 | 47  | 4.07 | Expt2 |       |
| QEVVQYDEPDLR          | 12 | 112421039                                                                         | N-Term(ITRAQ4plex)                                  | 1763.86125 | 63 | 87  | 4.71 | Expt2 |       |
| DVTGAEALLER           | 13 | 115496850                                                                         | N-Term(ITRAQ4plex)                                  | 1317.71282 | 63 | 72  | 4.53 | Expt2 |       |
| FDVEPDTYCR            | 20 | 125490382                                                                         | N-Term(ITRAQ4plex), C9(Methylthio)                  | 1434.61443 | 63 | 46  | 3.63 | Expt2 |       |
| SMAEAMIQLOEELAAAER    | 5  | 114326446                                                                         | N-Term(ITRAQ4plex), M2(Oxidation)                   | 2209.06675 | 63 | 47  | 1.14 | 4.97  | Expt2 |
| MLDYLOGSGETPQTDIR     | 9  | 6679891                                                                           | N-Term(ITRAQ4plex)                                  | 2068.01348 | 63 | 115 | 4.99 | Expt2 |       |
| VESVFETLVDSPEESTLTK   | 3  | 157951706                                                                         | N-Term(ITRAQ4plex), K21(ITRAQ4plex)                 | 2656.34635 | 63 | 60  | 5.85 | Expt2 |       |
| NVSSFDDATSPLOENR      | 4  | 149250822:149250824:149269443                                                     | N-Term(ITRAQ4plex)                                  | 2020.96623 | 63 | 89  | 4.21 | Expt2 |       |
| YYPTEDVPR             | 8  | 82880886:149261044:149270558:84662736                                             | N-Term(ITRAQ4plex)                                  | 1283.63848 | 63 | 44  | 4.20 | Expt2 |       |
| GCADNMTLTVSR          | 6  | 158635992                                                                         | N-Term(ITRAQ4plex), C2(Methylthio)                  | 1457.66655 | 63 | 76  | 4.59 | Expt2 |       |
| ADVOSIIGLQR           | 4  | 170295840                                                                         | N-Term(ITRAQ4plex)                                  | 1343.77690 | 63 | 55  | 4.10 | Expt2 |       |
| LHILASGGPOALVNIMR     | 7  | 6671684                                                                           | N-Term(ITRAQ4plex), M16(Oxidation)                  | 1926.13968 | 63 | 66  | 4.12 | Expt2 |       |
| SGNTPLDMNQFR          | 6  | 17157983                                                                          | N-Term(ITRAQ4plex)                                  | 1523.74004 | 63 | 58  | 4.04 | Expt2 |       |
| TIGTGLVTDVPMTEEDK     | 3  | 149258822:27370092                                                                | N-Term(ITRAQ4plex), K18(ITRAQ4plex)                 | 2165.12656 | 63 | 53  | 4.60 | Expt2 |       |
| GVDSIPGFEDR           | 8  | 227499103:227499234                                                               | N-Term(ITRAQ4plex)                                  | 1482.73479 | 63 | 48  | 3.80 | Expt2 |       |
| TGETGASGPPGVGEK       | 3  | 111120329                                                                         | N-Term(ITRAQ4plex), K16(ITRAQ4plex)                 | 1778.90805 | 63 | 48  | 4.46 | Expt2 |       |
| VFASLPQVER            | 11 | 6755995                                                                           | N-Term(ITRAQ4plex)                                  | 1289.73479 | 63 | 47  | 3.98 | Expt2 |       |
| GGIVDEGALLR           | 12 | 52353955                                                                          | N-Term(ITRAQ4plex)                                  | 1243.71404 | 63 | 57  | 4.28 | Expt2 |       |

|                          |    |                                                           |                                                                       |            |    |     |      |       |
|--------------------------|----|-----------------------------------------------------------|-----------------------------------------------------------------------|------------|----|-----|------|-------|
| AITYLNTGYQR              | 87 | 148277039                                                 | N-Term(iTRAQ4plex)                                                    | 1443.77019 | 63 | 61  | 4.34 | Expt2 |
| AYLPVNESFGFTADLR         | 13 | 33859482                                                  | N-Term(iTRAQ4plex)                                                    | 1944.00005 | 63 | 73  | 4.42 | Expt2 |
| TAVETAALLLR              | 9  | 6753320                                                   | N-Term(iTRAQ4plex)                                                    | 1329.82549 | 63 | 58  | 3.90 | Expt2 |
| MGESDDSLR                | 7  | 94400159;21536222                                         | N-Term(iTRAQ4plex)                                                    | 1266.61284 | 63 | 58  | 3.65 | Expt2 |
| EVYMGNVIOGGEGQAPTR       | 5  | 21450129                                                  | N-Term(iTRAQ4plex), M4(Oxidation)                                     | 2066.01225 | 63 | 86  | 3.86 | Expt2 |
| DFNMPLTISSLK             | 6  | 170650623;170650625;170650627                             | N-Term(iTRAQ4plex), K12(iTRAQ4plex)                                   | 1653.91692 | 63 | 74  | 4.15 | Expt2 |
| DNLAEDIMR                | 6  | 31982755                                                  | N-Term(iTRAQ4plex)                                                    | 1220.60625 | 63 | 46  | 3.75 | Expt2 |
| GTVDFPFGDGR              | 56 | 6753060                                                   | N-Term(iTRAQ4plex)                                                    | 1412.69341 | 63 | 70  | 4.28 | Expt2 |
| ISGLIYEETR               | 39 | 149263932;94378251                                        | N-Term(iTRAQ4plex)                                                    | 1324.72698 | 63 | 61  | 3.99 | Expt2 |
| LNGTDPEDVIR              | 11 | 21728376;71037403;198278553                               | N-Term(iTRAQ4plex), N2(Deamidated)                                    | 1373.70366 | 63 | 54  | 3.48 | Expt2 |
| TLVLLDNLNVR              | 2  | 46195798                                                  | N-Term(iTRAQ4plex)                                                    | 1413.85918 | 63 | 54  |      | Expt2 |
| QDVYGPQPQVR              | 2  | 146219835;146219830;146219849;146231979                   | N-Term(iTRAQ4plex)                                                    | 1430.75322 | 63 | 44  |      | Expt2 |
| DSAFGLLR                 | 18 | 20330802                                                  | N-Term(iTRAQ4plex)                                                    | 1022.57726 | 63 | 44  | 3.43 | Expt2 |
| TYQLVYFLDK               | 5  | 227499103;227499234                                       | N-Term(iTRAQ4plex), K10(iTRAQ4plex)                                   | 1577.88774 | 63 | 65  | 1.17 | Expt2 |
| YLAEVAAGDDK              | 3  | 149269348;6756041                                         | N-Term(iTRAQ4plex), K11(iTRAQ4plex)                                   | 1439.77080 | 63 | 63  | 3.93 | Expt2 |
| IIEFPFQNK                | 2  | 6678103                                                   | N-Term(iTRAQ4plex), K9(iTRAQ4plex)                                    | 1389.84026 | 63 | 58  |      | Expt2 |
| GFFELFPSVSR              | 15 | 161016822;161016820                                       | N-Term(iTRAQ4plex)                                                    | 1429.76409 | 63 | 56  | 4.20 | Expt2 |
| DPEAPLVVPGLR             | 8  | 115647999                                                 | N-Term(iTRAQ4plex)                                                    | 1406.81267 | 63 | 52  | 3.48 | Expt2 |
| EYSGVIEEFLATGEK          | 7  | 227499103                                                 | N-Term(iTRAQ4plex), K16(iTRAQ4plex)                                   | 2089.06437 | 63 | 52  | 4.20 | Expt2 |
| EGGLGPLNIPLADVTK         | 9  | 148747558                                                 | N-Term(iTRAQ4plex), K17(iTRAQ4plex)                                   | 1995.17558 | 63 | 86  | 5.60 | Expt2 |
| AVELAAATK                | 3  | 6678359                                                   | N-Term(iTRAQ4plex), K9(iTRAQ4plex)                                    | 1204.72515 | 63 | 66  | 3.87 | Expt2 |
| DPENFPFVVLGNK            | 8  | 148747526                                                 | N-Term(iTRAQ4plex), K13(iTRAQ4plex)                                   | 1763.96550 | 63 | 77  | 4.40 | Expt2 |
| DLPELALDTPR              | 12 | 110625656;270309161                                       | N-Term(iTRAQ4plex)                                                    | 1383.75896 | 63 | 57  | 3.92 | Expt2 |
| ALVDELEWEIAR             | 3  | 9903607                                                   | N-Term(iTRAQ4plex)                                                    | 1587.84990 | 63 | 62  | 4.35 | Expt2 |
| EMVQNLMLR                | 9  | 227330582;6996917                                         | N-Term(iTRAQ4plex)                                                    | 1376.75273 | 63 | 50  | 4.03 | Expt2 |
| NFITAEELR                | 16 | 11230802                                                  | N-Term(iTRAQ4plex)                                                    | 1236.67168 | 62 | 54  | 3.45 | Expt2 |
| TYODALESLVAR             | 3  | 6678493                                                   | N-Term(iTRAQ4plex)                                                    | 1445.81096 | 62 | 70  | 4.04 | Expt2 |
| EYQLNDSAAYYLNDLER        | 13 | 41054806                                                  | N-Term(iTRAQ4plex)                                                    | 2221.05718 | 62 | 88  | 5.34 | Expt2 |
| NLEGVYGFANLPNOVYR        | 11 | 28173550                                                  | N-Term(iTRAQ4plex)                                                    | 2098.08867 | 62 | 72  | 5.02 | Expt2 |
| YIATPIFSK                | 2  | 6754084                                                   | N-Term(iTRAQ4plex), K9(iTRAQ4plex)                                    | 1327.78850 | 62 | 62  |      | Expt2 |
| GDFILVGDLMR              | 3  | 7657011                                                   | N-Term(iTRAQ4plex)                                                    | 1379.75139 | 62 | 45  | 3.88 | Expt2 |
| EAFNMIDQNR               | 25 | 21728376;71037403;198278553                               | N-Term(iTRAQ4plex)                                                    | 1381.66496 | 62 | 55  | 4.05 | Expt2 |
| TYADYESVNECEGVCK         | 6  | 149258586                                                 | N-Term(iTRAQ4plex), C11(Methylthio), C16(Methylthio), K17(iTRAQ4plex) | 2320.95188 | 62 | 55  | 4.82 | Expt2 |
| ALAGCDFLTIISPK           | 17 | 33859640                                                  | N-Term(iTRAQ4plex), C5(Methylthio), K13(iTRAQ4plex)                   | 1669.89629 | 62 | 74  | 4.96 | Expt2 |
| FYEGSELVADSGVTIDTTMR     | 9  | 6755781                                                   | N-Term(iTRAQ4plex)                                                    | 2335.13303 | 62 | 71  | 1.26 | Expt2 |
| DSPLLLQOISAMR            | 3  | 118601017                                                 | N-Term(iTRAQ4plex)                                                    | 1615.89739 | 62 | 75  | 4.26 | Expt2 |
| YMNSGPVVAMWVGLNVVK       | 3  | 94375800;6679078                                          | N-Term(iTRAQ4plex), K19(iTRAQ4plex)                                   | 2381.26444 | 62 | 61  | 5.81 | Expt2 |
| LADIQIEQLNR              | 4  | 13385532                                                  | N-Term(iTRAQ4plex)                                                    | 1456.82512 | 62 | 45  | 4.33 | Expt2 |
| AQIWDTAGOER              | 7  | 31980840;6679583                                          | N-Term(iTRAQ4plex)                                                    | 1418.71636 | 62 | 53  | 3.57 | Expt2 |
| MDLPSATVSVTVK            | 3  | 124249090                                                 | N-Term(iTRAQ4plex), K13(iTRAQ4plex)                                   | 1635.92290 | 62 | 81  | 4.00 | Expt2 |
| SVFQVSQMVAR              | 21 | 6671688                                                   | N-Term(iTRAQ4plex)                                                    | 1395.75713 | 62 | 62  | 4.48 | Expt2 |
| TDPSIMGGMIVR             | 9  | 149251053                                                 | N-Term(iTRAQ4plex)                                                    | 1420.74101 | 62 | 59  | 4.36 | Expt2 |
| LVTFELEK                 | 12 | 31560625                                                  | N-Term(iTRAQ4plex), K8(iTRAQ4plex)                                    | 1266.76482 | 62 | 66  | 3.70 | Expt2 |
| VEIANDOGNR               | 62 | 124339838;50345978;124339829;124339826;31981690;254540166 | N-Term(iTRAQ4plex), N6(Deamidated)                                    | 1373.71819 | 62 | 65  | 1.22 | Expt2 |
| IVFADGNFWGR              | 8  | 8393866                                                   | N-Term(iTRAQ4plex)                                                    | 1425.74162 | 62 | 60  | 4.02 | Expt2 |
| SDIGEVLVGGMTR            | 5  | 162461907                                                 | N-Term(iTRAQ4plex)                                                    | 1590.86614 | 62 | 60  | 4.61 | Expt2 |
| CDENIWLWDYK              | 18 | 31981562                                                  | N-Term(iTRAQ4plex), C1(Methylthio), K11(iTRAQ4plex)                   | 1745.85356 | 62 | 76  | 0.99 | Expt2 |
| VSSTATTQDVIELAEK         | 3  | 145587092                                                 | N-Term(iTRAQ4plex), K17(iTRAQ4plex)                                   | 2081.12748 | 62 | 43  | 4.15 | Expt2 |
| LVVPATQCGSLIGK           | 16 | 6754994                                                   | N-Term(iTRAQ4plex), C8(Methylthio), K14(iTRAQ4plex)                   | 1719.98271 | 62 | 110 | 4.75 | Expt2 |
| EYQELMNTK                | 12 | 20911031                                                  | N-Term(iTRAQ4plex), K9(iTRAQ4plex)                                    | 1443.74797 | 62 | 58  | 4.33 | Expt2 |
| ILFEVFDENR               | 14 | 56699423;167466245                                        | N-Term(iTRAQ4plex)                                                    | 1425.75286 | 62 | 67  | 4.09 | Expt2 |
| VPDVLVADPPTAR            | 4  | 6679891                                                   | N-Term(iTRAQ4plex)                                                    | 1493.84404 | 62 | 59  | 3.98 | Expt2 |
| GTGLOPGEELPDIAIPLVTPDEPK | 3  | 7305619                                                   | N-Term(iTRAQ4plex), K25(iTRAQ4plex)                                   | 2887.52176 | 62 | 48  | 4.36 | Expt2 |
| DFMIQGGDFTR              | 24 | 71774133                                                  | N-Term(iTRAQ4plex)                                                    | 1430.68559 | 62 | 59  | 4.38 | Expt2 |

|                           |     |                                                                                                                         |                                                      |            |    |     |      |      |       |
|---------------------------|-----|-------------------------------------------------------------------------------------------------------------------------|------------------------------------------------------|------------|----|-----|------|------|-------|
| SAMPVDAPLCR               | 16  | 10946680                                                                                                                | N-Term(iTRAQ4plex), M3(Oxidation), C10(Methylthio)   | 1478.72893 | 62 | 47  |      | 3.59 | Expt2 |
| IAVQPGTLGPOGR             | 9   | 226437587                                                                                                               | N-Term(iTRAQ4plex)                                   | 1437.82829 | 62 | 61  |      |      | Expt2 |
| ITSGPFEPDLYK              | 3   | 6755100                                                                                                                 | N-Term(iTRAQ4plex), K12(iTRAQ4plex)                  | 1654.90056 | 62 | 59  |      | 4.37 | Expt2 |
| DIPLDTTTPR                | 31  | 94367038;82885362;149258986;82922450;149265796;82955311;149271678                                                       | N-Term(iTRAQ4plex)                                   | 1428.78496 | 62 | 69  |      | 4.28 | Expt2 |
| TTGFGMIYDSLDAK            | 9   | 46519156;46519160;149267855;149271781                                                                                   | N-Term(iTRAQ4plex), K15(iTRAQ4plex)                  | 1969.98393 | 62 | 110 |      | 4.80 | Expt2 |
| SPNQNVQAAAGALR            | 19  | 9790161                                                                                                                 | N-Term(iTRAQ4plex)                                   | 1668.89092 | 62 | 87  |      | 5.29 | Expt2 |
| GEISSTQDAMMEEIFR          | 3   | 30519997                                                                                                                | N-Term(iTRAQ4plex), M11(Oxidation)                   | 2003.92095 | 62 | 83  |      |      | Expt2 |
| GACYPPVGDLLIGR            | 3   | 113865981                                                                                                               | N-Term(iTRAQ4plex), C3(Methylthio)                   | 1620.83977 | 62 | 72  |      | 3.64 | Expt2 |
| FEQINAESEIIR              | 6   | 6680139;46909579                                                                                                        | N-Term(iTRAQ4plex)                                   | 1705.84953 | 62 | 68  |      | 4.72 | Expt2 |
| VFVYGLPAEGR               | 8   | 17933768                                                                                                                | N-Term(iTRAQ4plex)                                   | 1386.78630 | 62 | 54  |      | 4.12 | Expt2 |
| VDINAPDQVDR               | 18  | 61743961                                                                                                                | N-Term(iTRAQ4plex)                                   | 1356.72429 | 62 | 60  |      | 4.54 | Expt2 |
| EMEALEEDER                | 8   | 114326446                                                                                                               | N-Term(iTRAQ4plex)                                   | 1394.62407 | 62 | 48  |      | 4.12 | Expt2 |
| VLPSTTEILK                | 3   | 6679299                                                                                                                 | N-Term(iTRAQ4plex), K11(iTRAQ4plex)                  | 1501.95378 | 62 | 64  |      |      | Expt2 |
| CNGVLEGIR                 | 4   | 82935925;94397543;124486959;205830428;145864471;6754774;82524274;18859641;29336026;67189167;33598964;114326446;71143152 | N-Term(iTRAQ4plex), C1(Methylthio), N2(Deamidated)   | 1151.56597 | 62 | 32  |      |      | Expt2 |
| QLLTLSNELSQAR             | 32  | 149266483                                                                                                               | N-Term(iTRAQ4plex)                                   | 1616.90740 | 62 | 73  | 1.20 | 4.99 | Expt2 |
| VEGSEPTTPFNLFIGNLNPKN     | 6   | 84875537                                                                                                                | N-Term(iTRAQ4plex), K21(iTRAQ4plex)                  | 2576.36386 | 62 | 62  |      | 5.78 | Expt2 |
| SLEQLQIAR                 | 149 | 6680554                                                                                                                 | N-Term(iTRAQ4plex)                                   | 1201.70239 | 62 | 78  |      | 4.10 | Expt2 |
| MMNNYDCLPPEETNPK          | 6   | 9790161                                                                                                                 | N-Term(iTRAQ4plex), C8(Methylthio), K18(iTRAQ4plex)  | 2473.07737 | 62 | 50  |      | 4.76 | Expt2 |
| GLAGAVSELLR               | 4   | 227116327                                                                                                               | N-Term(iTRAQ4plex)                                   | 1229.73393 | 62 | 53  |      | 3.70 | Expt2 |
| EGVIEIILASR               | 13  | 149265291;22165408                                                                                                      | N-Term(iTRAQ4plex)                                   | 1343.80339 | 62 | 56  |      | 4.34 | Expt2 |
| DWGNQVATILSR              | 9   | 23510313                                                                                                                | N-Term(iTRAQ4plex)                                   | 1502.83122 | 62 | 93  |      | 4.38 | Expt2 |
| NMMGNIAGANNLR             | 5   | 9790161                                                                                                                 | N-Term(iTRAQ4plex)                                   | 1519.75981 | 62 | 83  |      | 4.40 | Expt2 |
| VAPLGAELQESAR             | 12  | 160333304                                                                                                               | N-Term(iTRAQ4plex)                                   | 1484.82146 | 62 | 77  |      | 4.32 | Expt2 |
| FVSIIDLVPK                | 17  | 116089273                                                                                                               | N-Term(iTRAQ4plex), K11(iTRAQ4plex)                  | 1539.90618 | 62 | 74  |      | 3.74 | Expt2 |
| FLAVGLVDNTR               | 7   | 19527174                                                                                                                | N-Term(iTRAQ4plex)                                   | 1447.84270 | 62 | 69  |      | 4.29 | Expt2 |
| YVECSALTQK                | 6   | 6753364                                                                                                                 | N-Term(iTRAQ4plex), C4(Methylthio), K10(iTRAQ4plex)  | 1475.74565 | 62 | 68  |      | 4.06 | Expt2 |
| EFVAVTGTEEDR              | 9   | 38198665                                                                                                                | N-Term(iTRAQ4plex)                                   | 1496.73906 | 62 | 56  |      | 4.07 | Expt2 |
| YWEIFPNTFR                | 174 | 6681143                                                                                                                 | N-Term(iTRAQ4plex), N7(Deamidated)                   | 1517.75871 | 62 | 51  |      | 4.16 | Expt2 |
| ELLTGPGLLEER              | 6   | 149253441;41152116                                                                                                      | N-Term(iTRAQ4plex)                                   | 1470.83074 | 62 | 49  |      | 3.65 | Expt2 |
| VLATAFDITLGGGR            | 4   | 112293266                                                                                                               | N-Term(iTRAQ4plex)                                   | 1465.81841 | 62 | 48  |      | 4.17 | Expt2 |
| DITYFIQQLLR               | 9   | 52345394;23956222                                                                                                       | N-Term(iTRAQ4plex)                                   | 1553.88689 | 62 | 65  |      | 4.17 | Expt2 |
| VTLSAAPPYFR               | 3   | 21704174                                                                                                                | N-Term(iTRAQ4plex)                                   | 1452.79827 | 62 | 44  |      | 4.50 | Expt2 |
| CLYASVLTQPR               | 17  | 33859482                                                                                                                | N-Term(iTRAQ4plex), C1(Methylthio)                   | 1511.78667 | 62 | 67  |      | 4.37 | Expt2 |
| LVINGNGTVEDR              | 9   | 85540471;85540466;85540468                                                                                              | N-Term(iTRAQ4plex), N4(Deamidated), N7(Deamidated)   | 1489.76238 | 62 | 89  |      | 3.60 | Expt2 |
| SLEDOVETLR                | 6   | 6679465                                                                                                                 | N-Term(iTRAQ4plex)                                   | 1333.71233 | 62 | 62  |      | 3.91 | Expt2 |
| QTTVNSQOAYQEAFAEISK       | 16  | 31543974                                                                                                                | N-Term(iTRAQ4plex), K19(iTRAQ4plex)                  | 2447.23174 | 62 | 133 |      | 5.84 | Expt2 |
| FSNEEIAMATVTALR           | 27  | 6671539                                                                                                                 | N-Term(iTRAQ4plex), M8(Oxidation)                    | 1812.93401 | 62 | 87  |      | 5.41 | Expt2 |
| IMNVIGEPIER               | 24  | 31980648                                                                                                                | N-Term(iTRAQ4plex)                                   | 1529.81316 | 61 | 60  |      | 3.98 | Expt2 |
| AIIHFVPVQLK               | 19  | 6755376;149270446;83004243                                                                                              | N-Term(iTRAQ4plex), K12(iTRAQ4plex)                  | 1626.06406 | 61 | 57  |      | 4.20 | Expt2 |
| ALTYPELTOQMFDSK           | 12  | 33859488;21746161                                                                                                       | N-Term(iTRAQ4plex), K15(iTRAQ4plex)                  | 1996.07572 | 61 | 58  | 1.15 | 4.64 | Expt2 |
| MSSYAFFVQTCR              | 4   | 149261847;82952271;149266674;149266934;83014391;6680229                                                                 | N-Term(iTRAQ4plex), M1(Oxidation), C11(Methylthio)   | 1645.72698 | 61 | 47  |      | 3.98 | Expt2 |
| SGEYWDPNQGCNLDIAK         | 4   | 34328108                                                                                                                | N-Term(iTRAQ4plex), C12(Methylthio), K18(iTRAQ4plex) | 2357.11960 | 61 | 46  |      | 4.55 | Expt2 |
| WLPSTSPVTGYR              | 9   | 46849812                                                                                                                | N-Term(iTRAQ4plex)                                   | 1507.80620 | 61 | 42  |      |      | Expt2 |
| GISCMNTVSESPFK            | 5   | 27754065                                                                                                                | N-Term(iTRAQ4plex), C4(Methylthio), K15(iTRAQ4plex)  | 1934.93083 | 61 | 91  |      | 5.05 | Expt2 |
| DINDNAPVFNPSYQGVQVPEVFNAR | 14  | 6753374                                                                                                                 | N-Term(iTRAQ4plex)                                   | 3032.45304 | 61 | 88  |      | 6.53 | Expt2 |
| ATTLNNAVSSLASTGLSLTK      | 4   | 32567788                                                                                                                | N-Term(iTRAQ4plex), K20(iTRAQ4plex)                  | 2210.25418 | 61 | 77  | 0.99 | 4.99 | Expt2 |
| ATLYVTAEIDR               | 6   | 9790109                                                                                                                 | N-Term(iTRAQ4plex)                                   | 1395.75932 | 61 | 64  |      | 4.04 | Expt2 |
| SFFPEEISSMVLTK            | 17  | 124339829;124339826                                                                                                     | N-Term(iTRAQ4plex), M10(Oxidation), K14(iTRAQ4plex)  | 1919.01238 | 61 | 72  |      | 5.21 | Expt2 |
| AFYPEEISSMVLTK            | 12  | 124339838                                                                                                               | N-Term(iTRAQ4plex), M10(Oxidation), K14(iTRAQ4plex)  | 1919.01487 | 61 | 50  |      | 4.10 | Expt2 |
| EDQTEYLEER                | 21  | 40556608;6754254                                                                                                        | N-Term(iTRAQ4plex)                                   | 1455.67558 | 61 | 60  |      | 4.84 | Expt2 |
| GDEELDSLK                 | 6   | 7949045;94378041;256773209                                                                                              | N-Term(iTRAQ4plex), K10(iTRAQ4plex)                  | 1406.76299 | 61 | 61  |      | 4.65 | Expt2 |

|                              |    |                                                                                                                                                                                                                                                                                                |                                                      |            |    |     |      |      |       |
|------------------------------|----|------------------------------------------------------------------------------------------------------------------------------------------------------------------------------------------------------------------------------------------------------------------------------------------------|------------------------------------------------------|------------|----|-----|------|------|-------|
| MIAGQVLDINLAAEPK             | 6  | 8393544;283436180;283436176;283436182                                                                                                                                                                                                                                                          | N-Term(iTRAQ4plex), K16(iTRAQ4plex)                  | 1971.12517 | 61 | 78  |      | 4.73 | Expt2 |
| AVFQANQENPILK                | 13 | 21450277                                                                                                                                                                                                                                                                                       | N-Term(iTRAQ4plex), K14(iTRAQ4plex)                  | 1873.08513 | 61 | 68  |      | 5.08 | Expt2 |
| EDMAALEKDYEEVGVDSVEGEGEEGEEY | 6  | 6755901;34740335;51765047;82930560                                                                                                                                                                                                                                                             | N-Term(iTRAQ4plex), K8(iTRAQ4plex)                   | 3524.52024 | 61 | 65  |      | 4.45 | Expt2 |
| VLOPTIFFVVR                  | 15 | 31560705                                                                                                                                                                                                                                                                                       | N-Term(iTRAQ4plex)                                   | 1509.92876 | 61 | 64  |      | 4.10 | Expt2 |
| QLQNIQATSR                   | 17 | 82950147;82950149;149264086                                                                                                                                                                                                                                                                    | N-Term(iTRAQ4plex)                                   | 1415.81279 | 61 | 62  |      | 4.57 | Expt2 |
| EVLAEALEGR                   | 3  | 28077029                                                                                                                                                                                                                                                                                       | N-Term(iTRAQ4plex)                                   | 1472.80876 | 61 | 53  |      | 4.60 | Expt2 |
| GVVPEDAVETLAGSLGTR           | 25 | 33563246                                                                                                                                                                                                                                                                                       | N-Term(iTRAQ4plex)                                   | 1915.02849 | 61 | 100 |      | 5.54 | Expt2 |
| LDVGNFSWGSECCTR              | 16 | 149257598;149250154;94387984;149264053                                                                                                                                                                                                                                                         | N-Term(iTRAQ4plex), C12(Methylthio), C13(Methylthio) | 1909.77776 | 61 | 79  |      | 4.88 | Expt2 |
| TQTAVASEEGPATLPEAEALQAHAALR  | 5  | 55926127                                                                                                                                                                                                                                                                                       | N-Term(iTRAQ4plex)                                   | 2989.57523 | 61 | 87  |      | 5.44 | Expt2 |
| DYLDFLDDEEDOGIYONK           | 3  | 33859484                                                                                                                                                                                                                                                                                       | N-Term(iTRAQ4plex), K18(iTRAQ4plex)                  | 2508.17044 | 61 | 58  |      | 5.31 | Expt2 |
| SEIDLLNIR                    | 15 | 31981302;158966670                                                                                                                                                                                                                                                                             | N-Term(iTRAQ4plex)                                   | 1216.70146 | 61 | 51  |      | 3.73 | Expt2 |
| DYIPVDQELR                   | 5  | 134288917                                                                                                                                                                                                                                                                                      | N-Term(iTRAQ4plex)                                   | 1520.77324 | 61 | 49  |      |      | Expt2 |
| MLOTSSVLVSGLR                | 12 | 6678483                                                                                                                                                                                                                                                                                        | N-Term(iTRAQ4plex)                                   | 1534.87700 | 61 | 68  |      | 4.43 | Expt2 |
| TALINSTGEEVAMR               | 6  | 9506843;162287370;161760667                                                                                                                                                                                                                                                                    | N-Term(iTRAQ4plex), M13(Oxidation)                   | 1651.84659 | 61 | 67  |      | 5.54 | Expt2 |
| VEQIAIAQELNELDYDSSHVNTR      | 2  | 11230802                                                                                                                                                                                                                                                                                       | N-Term(iTRAQ4plex)                                   | 3049.50893 | 61 | 37  |      |      | Expt2 |
| GANDFCDEMER                  | 3  | 110625624                                                                                                                                                                                                                                                                                      | N-Term(iTRAQ4plex), C7(Methylthio)                   | 1607.60942 | 61 | 42  |      | 4.95 | Expt2 |
| GYSFTTIAER                   | 66 | 6671509;6752954                                                                                                                                                                                                                                                                                | N-Term(iTRAQ4plex)                                   | 1276.62895 | 61 | 57  |      | 3.76 | Expt2 |
| LGLQNDLFLSLAR                | 5  | 68226731                                                                                                                                                                                                                                                                                       | N-Term(iTRAQ4plex)                                   | 1490.85137 | 61 | 65  |      | 5.04 | Expt2 |
| VTSEPOGFLER                  | 5  | 21311891                                                                                                                                                                                                                                                                                       | N-Term(iTRAQ4plex)                                   | 1503.79302 | 61 | 52  |      | 4.14 | Expt2 |
| QDVEVEIPAR                   | 35 | 111074529                                                                                                                                                                                                                                                                                      | N-Term(iTRAQ4plex)                                   | 1287.66924 | 61 | 72  |      | 3.69 | Expt2 |
| IVMAAAK                      | 5  | 163310769;34328288                                                                                                                                                                                                                                                                             | N-Term(iTRAQ4plex), K8(iTRAQ4plex)                   | 1062.66728 | 61 | 55  | 1.21 |      | Expt2 |
| TLTLVDTGIGMTK                | 16 | 40556608;6754254                                                                                                                                                                                                                                                                               | N-Term(iTRAQ4plex), M11(Oxidation), K13(iTRAQ4plex)  | 1653.93926 | 61 | 82  |      | 4.04 | Expt2 |
| QLAQIDGLSTIEFOR              | 10 | 149250318;28077049                                                                                                                                                                                                                                                                             | N-Term(iTRAQ4plex)                                   | 1964.06009 | 61 | 83  |      | 5.50 | Expt2 |
| NTGHICTGPASR                 | 32 | 31981562                                                                                                                                                                                                                                                                                       | N-Term(iTRAQ4plex), C6(Methylthio)                   | 1492.77509 | 61 | 67  |      | 4.74 | Expt2 |
| GMVSLSEIEALAK                | 5  | 148747189                                                                                                                                                                                                                                                                                      | N-Term(iTRAQ4plex), K14(iTRAQ4plex)                  | 1764.97043 | 61 | 65  |      | 4.87 | Expt2 |
| MLAEDEL                      | 14 | 6680718;6680716;6671571                                                                                                                                                                                                                                                                        | N-Term(iTRAQ4plex)                                   | 1120.57805 | 61 | 54  |      | 3.51 | Expt2 |
| ESTSFQDVGPOAPGVSVYQK         | 13 | 7304993;226423871;226423873                                                                                                                                                                                                                                                                    | N-Term(iTRAQ4plex), K20(iTRAQ4plex)                  | 2412.23691 | 61 | 70  |      | 6.21 | Expt2 |
| MDELQFLR                     | 7  | 225543319;94408011                                                                                                                                                                                                                                                                             | N-Term(iTRAQ4plex)                                   | 1195.62761 | 61 | 42  |      |      | Expt2 |
| MIAGQVLDINLAAEPK             | 3  | 8393544;283436180;283436176;283436182                                                                                                                                                                                                                                                          | N-Term(iTRAQ4plex), M1(Oxidation), K16(iTRAQ4plex)   | 1987.11838 | 61 | 50  |      | 4.80 | Expt2 |
| LOIWDTAGQER                  | 60 | 6679587;30424655;37718983;31560778;18390323;7710086;149253245;149264760;149264762;149269408;8394133;12963723;171184402;27734154;6679593;261862303;30425356;86476069;13195674;38372905;21313162;13470090;165377074;15042957;30424726;106507168;21313012;254939625;254939635;254939698;254750706 | N-Term(iTRAQ4plex)                                   | 1460.76225 | 61 | 48  |      | 3.83 | Expt2 |
| AEDNADTLALVFEAPNQEK          | 4  | 149270621;149270623;7242171                                                                                                                                                                                                                                                                    | N-Term(iTRAQ4plex), K19(iTRAQ4plex)                  | 2363.20292 | 61 | 48  |      | 4.51 | Expt2 |
| TLPGWNTDISNAR                | 7  | 31560737                                                                                                                                                                                                                                                                                       | N-Term(iTRAQ4plex)                                   | 1588.82121 | 61 | 64  |      | 4.09 | Expt2 |
| FANSLVGVQQQLQAFNTYR          | 11 | 117938332;117938334                                                                                                                                                                                                                                                                            | N-Term(iTRAQ4plex)                                   | 2328.23087 | 61 | 66  | 1.22 | 5.29 | Expt2 |
| APAAIGPYSOAVQVDR             | 7  | 40807498                                                                                                                                                                                                                                                                                       | N-Term(iTRAQ4plex)                                   | 1786.95806 | 61 | 82  |      | 4.12 | Expt2 |
| AQIQALQNSVR                  | 3  | 33563252;167555029                                                                                                                                                                                                                                                                             | N-Term(iTRAQ4plex)                                   | 1499.84294 | 61 | 49  |      | 3.70 | Expt2 |
| GSIFAVFDSIQSAK               | 10 | 6678143                                                                                                                                                                                                                                                                                        | N-Term(iTRAQ4plex), K14(iTRAQ4plex)                  | 1757.97673 | 61 | 86  |      | 4.16 | Expt2 |
| TFSFPAVVAPEK                 | 3  | 93102417                                                                                                                                                                                                                                                                                       | N-Term(iTRAQ4plex), K13(iTRAQ4plex)                  | 1745.99320 | 61 | 63  |      | 4.43 | Expt2 |
| LANSAFVADLFK                 | 4  | 6678103                                                                                                                                                                                                                                                                                        | N-Term(iTRAQ4plex), K12(iTRAQ4plex)                  | 1583.91045 | 61 | 95  |      | 4.52 | Expt2 |
| IVLLDSSLEYK                  | 6  | 6753320                                                                                                                                                                                                                                                                                        | N-Term(iTRAQ4plex), K11(iTRAQ4plex)                  | 1567.91863 | 61 | 88  | 1.45 | 4.21 | Expt2 |
| AVAEQIPLLVGGVR               | 7  | 227116327                                                                                                                                                                                                                                                                                      | N-Term(iTRAQ4plex)                                   | 1636.98638 | 61 | 75  |      | 4.13 | Expt2 |
| GAVGALLVYDIAK                | 8  | 31980840;6679583                                                                                                                                                                                                                                                                               | N-Term(iTRAQ4plex), K13(iTRAQ4plex)                  | 1577.95391 | 61 | 74  | 1.23 | 4.66 | Expt2 |
| DLVLSPESSQLR                 | 17 | 115647999                                                                                                                                                                                                                                                                                      | N-Term(iTRAQ4plex)                                   | 1574.85002 | 61 | 67  |      | 3.80 | Expt2 |
| LLELQEVDSLLR                 | 9  | 110735428;110735426                                                                                                                                                                                                                                                                            | N-Term(iTRAQ4plex)                                   | 1571.91777 | 61 | 63  |      | 4.19 | Expt2 |
| LOALSPELLAPVPR               | 7  | 16418335                                                                                                                                                                                                                                                                                       | N-Term(iTRAQ4plex)                                   | 1647.99712 | 61 | 62  |      | 3.96 | Expt2 |
| FLESLPEEQQR                  | 3  | 113205057;113205053                                                                                                                                                                                                                                                                            | N-Term(iTRAQ4plex)                                   | 1648.83196 | 61 | 51  |      | 3.92 | Expt2 |
| LATQLTGPVMPPIR               | 16 | 149251177;149252074;149258092                                                                                                                                                                                                                                                                  | N-Term(iTRAQ4plex), M10(Oxidation)                   | 1556.90068 | 61 | 49  |      | 3.66 | Expt2 |
| AFPWADWTSILSR                | 3  | 19527258                                                                                                                                                                                                                                                                                       | N-Term(iTRAQ4plex)                                   | 1578.84380 | 61 | 43  |      | 3.78 | Expt2 |

|                                    |     |                                                                |                                                                       |            |    |     |      |      |       |
|------------------------------------|-----|----------------------------------------------------------------|-----------------------------------------------------------------------|------------|----|-----|------|------|-------|
| TGVAPIIDVVR                        | 29  | 82885877:94369475:63572172:829519<br>93                        | N-Term(iTRAQ4plex)                                                    | 1283.78130 | 61 | 57  |      | 4.67 | Expt2 |
| GYAYVEFENPDEAEK                    | 4   | 121674790:121674799:149254861                                  | N-Term(iTRAQ4plex), K15(iTRAQ4plex)                                   | 2048.97270 | 60 | 84  | 1.58 | 4.92 | Expt2 |
| YAPSGFYIASGDISGK                   | 12  | 6755995                                                        | N-Term(iTRAQ4plex), K16(iTRAQ4plex)                                   | 1921.00321 | 60 | 50  |      | 4.92 | Expt2 |
| EAGDVCYADVYR                       | 9   | 149262253:118582271                                            | N-Term(iTRAQ4plex), C6(Methylthio)                                    | 1550.67644 | 60 | 71  |      | 4.63 | Expt2 |
| VMVQPNLIFR                         | 10  | 27883844                                                       | N-Term(iTRAQ4plex)                                                    | 1473.87309 | 60 | 44  |      | 4.03 | Expt2 |
| DFMIQGGFTAR                        | 5   | 6679441                                                        | N-Term(iTRAQ4plex)                                                    | 1501.72441 | 60 | 48  |      | 3.72 | Expt2 |
| NFILDOCNVNSGQR                     | 7   | 149270322:124487099                                            | N-Term(iTRAQ4plex), C7(Methylthio)                                    | 1960.90886 | 60 | 75  |      | 4.76 | Expt2 |
| TIISYIDEQFER                       | 11  | 6754816:228480253                                              | N-Term(iTRAQ4plex)                                                    | 1657.86003 | 60 | 76  |      | 4.02 | Expt2 |
| GESVMVPTLSEEEAK                    | 10  | 6671549                                                        | N-Term(iTRAQ4plex), K16(iTRAQ4plex)                                   | 1993.02825 | 60 | 62  |      | 5.11 | Expt2 |
| AVDSLVPIGR                         | 18  | 6680748                                                        | N-Term(iTRAQ4plex)                                                    | 1170.69829 | 60 | 62  |      | 3.64 | Expt2 |
| VOSTPVTIOVIDVR                     | 14  | 110625833                                                      | N-Term(iTRAQ4plex)                                                    | 1698.98833 | 60 | 82  |      | 4.30 | Expt2 |
| GGAGMGIGMGIAGSSGGSLCIFSNGDGLLSGSEK | 7   | 149262636:118130981                                            | N-Term(iTRAQ4plex), C22(Methylthio), K37(iTRAQ4plex)                  | 3549.66574 | 60 | 106 |      | 5.96 | Expt2 |
| ELLLOPVTISR                        | 36  | 13386054                                                       | N-Term(iTRAQ4plex)                                                    | 1412.86333 | 60 | 70  |      | 3.88 | Expt2 |
| WMDEAQLDTADR                       | 3   | 225543482                                                      | N-Term(iTRAQ4plex)                                                    | 1665.76543 | 60 | 65  |      |      | Expt2 |
| VSWTTPPSDSVDR                      | 45  | 111074529                                                      | N-Term(iTRAQ4plex)                                                    | 1489.73943 | 60 | 62  |      | 3.81 | Expt2 |
| YALYDATYETK                        | 10  | 149255823:6680924:6671746                                      | N-Term(iTRAQ4plex), K11(iTRAQ4plex)                                   | 1625.83745 | 60 | 82  |      | 4.08 | Expt2 |
| EVAGQVGVPLQDLMVR                   | 11  | 161016822:161016820                                            | N-Term(iTRAQ4plex)                                                    | 1855.02812 | 60 | 89  |      | 4.55 | Expt2 |
| QLDGLVGER                          | 69  | 20911031                                                       | N-Term(iTRAQ4plex)                                                    | 1130.62817 | 60 | 70  |      | 3.79 | Expt2 |
| VLSIGDGIAR                         | 14  | 6680748                                                        | N-Term(iTRAQ4plex)                                                    | 1144.68096 | 60 | 39  |      |      | Expt2 |
| LGYILTCPSNLGTGLR                   | 14  | 6753428:38259206                                               | N-Term(iTRAQ4plex), C7(Methylthio)                                    | 1867.99651 | 60 | 78  |      | 4.36 | Expt2 |
| YWLCATGPSIK                        | 6   | 6680047                                                        | N-Term(iTRAQ4plex), C4(Methylthio), K12(iTRAQ4plex)                   | 1643.86223 | 60 | 87  |      | 4.12 | Expt2 |
| FYGPGEPPYGVFAGR                    | 13  | 31980806                                                       | N-Term(iTRAQ4plex)                                                    | 1660.82561 | 60 | 79  |      | 4.86 | Expt2 |
| LGLPQDDDDPSLLVKNK                  | 6   | 162417980                                                      | N-Term(iTRAQ4plex), K16(iTRAQ4plex)                                   | 2040.12064 | 60 | 51  |      | 4.62 | Expt2 |
| LEEGPVTTLVTR                       | 14  | 6679261                                                        | N-Term(iTRAQ4plex)                                                    | 1555.88127 | 60 | 70  |      | 4.53 | Expt2 |
| DTDSEEIER                          | 5   | 6753244:149255339:13386230                                     | N-Term(iTRAQ4plex)                                                    | 1237.57219 | 60 | 51  |      | 3.60 | Expt2 |
| YSGCLTESNLIK                       | 23  | 6678329                                                        | N-Term(iTRAQ4plex), C4(Methylthio), K12(iTRAQ4plex)                   | 1661.84746 | 60 | 91  |      | 5.07 | Expt2 |
| LEPSGPSTINPCPCK                    | 5   | 149263750                                                      | N-Term(iTRAQ4plex), C13(Methylthio), C16(Methylthio), K17(iTRAQ4plex) | 2133.04685 | 60 | 54  |      | 5.05 | Expt2 |
| ITYGETGGNSPVOEFTVPGSK              | 11  | 46849812                                                       | N-Term(iTRAQ4plex), K21(iTRAQ4plex)                                   | 2456.25876 | 60 | 56  |      | 5.76 | Expt2 |
| SLQDLQLTNNK                        | 7   | 160333372                                                      | N-Term(iTRAQ4plex), K11(iTRAQ4plex)                                   | 1561.88945 | 60 | 77  |      | 4.87 | Expt2 |
| VEQLEALOR                          | 317 | 163310769                                                      | N-Term(iTRAQ4plex)                                                    | 1229.69690 | 60 | 66  |      | 4.47 | Expt2 |
| LLSPGSVMLVSAR                      | 3   | 160333789                                                      | N-Term(iTRAQ4plex)                                                    | 1473.85979 | 60 | 61  |      | 4.31 | Expt2 |
| FTVTPSTIQVVGILK                    | 8   | 6671672                                                        | N-Term(iTRAQ4plex), K15(iTRAQ4plex)                                   | 1879.11589 | 60 | 104 |      | 6.03 | Expt2 |
| ILGDPEARL                          | 28  | 6678321                                                        | N-Term(iTRAQ4plex)                                                    | 1127.65483 | 60 | 44  |      | 3.51 | Expt2 |
| LDDCGLTEVR                         | 14  | 31981748:285402638:285402659                                   | N-Term(iTRAQ4plex), C4(Methylthio)                                    | 1310.62029 | 60 | 54  |      | 3.64 | Expt2 |
| IVLQIDNAR                          | 8   | 6680606                                                        | N-Term(iTRAQ4plex)                                                    | 1185.71208 | 60 | 47  |      |      | Expt2 |
| ALEQFLQEYFDGNLK                    | 11  | 112293264                                                      | N-Term(iTRAQ4plex), K15(iTRAQ4plex)                                   | 2103.10552 | 60 | 80  | 1.46 | 5.26 | Expt2 |
| NIGDINQDGYPIAVGAPYDDLK             | 6   | 31982236                                                       | N-Term(iTRAQ4plex), K24(iTRAQ4plex)                                   | 2808.40152 | 60 | 82  |      | 5.74 | Expt2 |
| GGOMSFNLVDVPSLDR                   | 3   | 226423935                                                      | N-Term(iTRAQ4plex)                                                    | 1880.92583 | 60 | 70  |      | 4.89 | Expt2 |
| EMMLSHINSSITTK                     | 5   | 6753320                                                        | N-Term(iTRAQ4plex), K14(iTRAQ4plex)                                   | 1856.02080 | 60 | 67  |      | 3.68 | Expt2 |
| LGDVISIQPCPDVK                     | 17  | 225543319:94408011                                             | N-Term(iTRAQ4plex), C10(Methylthio), K14(iTRAQ4plex)                  | 1817.97954 | 60 | 64  |      | 3.82 | Expt2 |
| SDYLNTFEFMDK                       | 3   | 162417975                                                      | N-Term(iTRAQ4plex), K12(iTRAQ4plex)                                   | 1797.87046 | 60 | 50  |      | 3.71 | Expt2 |
| NEVPVPPER                          | 21  | 148277039                                                      | N-Term(iTRAQ4plex)                                                    | 1182.66098 | 60 | 68  |      | 3.91 | Expt2 |
| DLIDFDDR                           | 27  | 82950147:82950149:149264086                                    | N-Term(iTRAQ4plex)                                                    | 1152.56584 | 60 | 50  |      | 3.66 | Expt2 |
| MEDGEFWSFR                         | 3   | 160333229                                                      | N-Term(iTRAQ4plex)                                                    | 1578.68669 | 60 | 47  |      | 4.44 | Expt2 |
| LPOFGISTPGSDLDINIK                 | 13  | 61743961                                                       | N-Term(iTRAQ4plex), K18(iTRAQ4plex)                                   | 2203.23099 | 60 | 74  |      | 4.80 | Expt2 |
| IQLVAVNYIPEVR                      | 3   | 13385798                                                       | N-Term(iTRAQ4plex)                                                    | 1657.98076 | 60 | 65  |      | 3.70 | Expt2 |
| SCAEFVSGSLQR                       | 16  | 149266312:21313679                                             | N-Term(iTRAQ4plex), C2(Methylthio)                                    | 1473.69475 | 60 | 54  |      | 4.17 | Expt2 |
| EAVVQAEFAAAEITR                    | 6   | 126090932                                                      | N-Term(iTRAQ4plex)                                                    | 1730.90715 | 60 | 98  |      | 4.74 | Expt2 |
| MFVLDEADEMSLR                      | 24  | 176865892:21450625:176866061:1492<br>70417:226823309:176865998 | N-Term(iTRAQ4plex), M1(Oxidation)                                     | 1715.81499 | 60 | 82  |      | 3.52 | Expt2 |
| VTSSSGITFSSVTR                     | 5   | 27734847                                                       | N-Term(iTRAQ4plex)                                                    | 1719.90935 | 60 | 82  |      | 4.28 | Expt2 |
| LDLIAQOMMPEVR                      | 11  | 45504359                                                       | N-Term(iTRAQ4plex)                                                    | 1687.90618 | 60 | 77  |      | 4.58 | Expt2 |
| IYIDCYEIEK                         | 27  | 111074529                                                      | N-Term(iTRAQ4plex), C5(Methylthio), K11(iTRAQ4plex)                   | 1735.89104 | 60 | 75  | 1.21 | 4.47 | Expt2 |
| DOPPNVVEGLLNALR                    | 3   | 21450053                                                       | N-Term(iTRAQ4plex)                                                    | 1766.95366 | 60 | 58  |      | 3.84 | Expt2 |
| WSPVASTLPELVQR                     | 2   | 28076935                                                       | N-Term(iTRAQ4plex)                                                    | 1726.96269 | 60 | 53  |      |      | Expt2 |

|                         |    |                                                                                                |                                                                     |            |    |    |      |      |       |
|-------------------------|----|------------------------------------------------------------------------------------------------|---------------------------------------------------------------------|------------|----|----|------|------|-------|
| TFEGVDPQNTSMR           | 4  | 33859560                                                                                       | N-Term(iTRAQ4plex)                                                  | 1625.77214 | 60 | 59 |      | 3.85 | Expt2 |
| NVGLDIEAEVPAVK          | 4  | 126723461                                                                                      | N-Term(iTRAQ4plex), K14(iTRAQ4plex)                                 | 1742.00151 | 60 | 63 |      | 3.81 | Expt2 |
| LEICNLTPDALK            | 7  | 160333229                                                                                      | N-Term(iTRAQ4plex), C4(Methylthio), K12(iTRAQ4plex)                 | 1663.90618 | 60 | 82 |      | 4.12 | Expt2 |
| AMEIAEALGR              | 6  | 145699137;145864477;145699099;33186906;145864463;32526871;47059123;284413688                   | N-Term(iTRAQ4plex)                                                  | 1204.64604 | 60 | 58 |      | 3.63 | Expt2 |
| AGGSASAMLOPLLDNOVGFK    | 5  | 7242197                                                                                        | N-Term(iTRAQ4plex), K20(iTRAQ4plex)                                 | 2292.22867 | 60 | 54 |      | 5.03 | Expt2 |
| EODAFIAEALGK            | 6  | 29336026;114326446;241982716;241982718                                                         | N-Term(iTRAQ4plex), K12(iTRAQ4plex)                                 | 1593.87705 | 60 | 44 |      | 3.60 | Expt2 |
| SLNPSTEFISSTK           | 7  | 6678103                                                                                        | N-Term(iTRAQ4plex), K13(iTRAQ4plex)                                 | 1698.92436 | 60 | 98 |      | 4.03 | Expt2 |
| LGPALATGNVVMK           | 7  | 6753036                                                                                        | N-Term(iTRAQ4plex), K14(iTRAQ4plex)                                 | 1657.99785 | 60 | 67 |      | 5.11 | Expt2 |
| VGNLGLATSFNFR           | 8  | 25141235;6753620;14861844                                                                      | N-Term(iTRAQ4plex)                                                  | 1668.88652 | 60 | 79 |      | 4.69 | Expt2 |
| VTWEPAPGEVK             | 13 | 111074529                                                                                      | N-Term(iTRAQ4plex), K11(iTRAQ4plex)                                 | 1500.83428 | 60 | 64 |      | 4.10 | Expt2 |
| SQFTITPGSEQIR           | 6  | 18079339                                                                                       | N-Term(iTRAQ4plex)                                                  | 1607.85076 | 59 | 53 |      | 4.25 | Expt2 |
| ITGTNAEVMAPQWFQIGPCEGIR | 3  | 31982332                                                                                       | N-Term(iTRAQ4plex), C20(Methylthio)                                 | 2837.35984 | 59 | 44 |      | 4.75 | Expt2 |
| IEENTLNAELLR            | 11 | 110625833                                                                                      | N-Term(iTRAQ4plex)                                                  | 1558.86186 | 59 | 72 |      | 4.24 | Expt2 |
| GFGFILFK                | 5  | 146260280;6754222                                                                              | N-Term(iTRAQ4plex), K8(iTRAQ4plex)                                  | 1216.73125 | 59 | 41 |      | 4.24 | Expt2 |
| LEAPCQWMLER             | 12 | 110626070                                                                                      | N-Term(iTRAQ4plex), C5(Methylthio)                                  | 1693.80242 | 59 | 63 |      | 4.66 | Expt2 |
| GIFVLCK                 | 14 | 31981562                                                                                       | N-Term(iTRAQ4plex), C7(Methylthio), K8(iTRAQ4plex)                  | 1210.69109 | 59 | 51 |      | 4.66 | Expt2 |
| VYEEIAPVWR              | 7  | 94364712;82617575                                                                              | N-Term(iTRAQ4plex)                                                  | 1544.92107 | 59 | 45 |      | 4.20 | Expt2 |
| VYSYNLEESCIR            | 6  | 126518317                                                                                      | N-Term(iTRAQ4plex), C11(Methylthio)                                 | 1816.80229 | 59 | 72 |      | 4.49 | Expt2 |
| EGVLSFWR                | 23 | 22094075                                                                                       | N-Term(iTRAQ4plex)                                                  | 1265.67742 | 59 | 51 |      | 3.80 | Expt2 |
| QADYVPSDQDLR            | 3  | 47271396;117959921;117959928;117959930                                                         | N-Term(iTRAQ4plex)                                                  | 1663.83928 | 59 | 49 |      | 3.82 | Expt2 |
| NTNDANSQIIPONQVNR       | 12 | 116089273;33859560                                                                             | N-Term(iTRAQ4plex), C8(Methylthio)                                  | 2332.12773 | 59 | 99 |      | 5.58 | Expt2 |
| TYSYLPDLWK              | 12 | 82898647;149255335;94383782;94383784;149259263;63594466;149263154;149265803;149269495;94404463 | N-Term(iTRAQ4plex), K11(iTRAQ4plex)                                 | 1674.90386 | 59 | 87 |      | 4.26 | Expt2 |
| TYSYLPNLWK              | 12 | 82890069;149251540;82902507                                                                    | N-Term(iTRAQ4plex), N8(Deamidated), K11(iTRAQ4plex)                 | 1674.90386 | 59 | 87 |      | 4.26 | Expt2 |
| VTNGAFTGEISPGMIK        | 7  | 226958349                                                                                      | N-Term(iTRAQ4plex), N3(Deamidated), M14(Oxidation), K16(iTRAQ4plex) | 1927.01421 | 59 | 62 |      | 4.81 | Expt2 |
| GNFNIEFTR               | 26 | 21728376;71037403                                                                              | N-Term(iTRAQ4plex)                                                  | 1404.70586 | 59 | 52 |      | 4.49 | Expt2 |
| GVSSGPGPMGLMGPR         | 49 | 111120329                                                                                      | N-Term(iTRAQ4plex), M12(Oxidation)                                  | 1559.77751 | 59 | 82 |      | 4.35 | Expt2 |
| CPDNTLGVDCIER           | 3  | 94394792;171543883                                                                             | N-Term(iTRAQ4plex), C1(Methylthio), C10(Methylthio)                 | 1670.71343 | 59 | 40 |      | 4.47 | Expt2 |
| FLEQNOVQLTK             | 16 | 47059013;51092295;51092293;9910294;126116585                                                   | N-Term(iTRAQ4plex), K12(iTRAQ4plex)                                 | 1763.99126 | 59 | 90 |      | 5.37 | Expt2 |
| LVTLEEFVASTQR           | 12 | 6679158;254750698                                                                              | N-Term(iTRAQ4plex)                                                  | 1650.92264 | 59 | 57 |      | 4.02 | Expt2 |
| QIIVDPLSFSEER           | 13 | 6753294                                                                                        | N-Term(iTRAQ4plex)                                                  | 1676.89946 | 59 | 62 |      | 4.01 | Expt2 |
| GNLEVLFTIQSK            | 7  | 55926127;117938332;117938334                                                                   | N-Term(iTRAQ4plex), K13(iTRAQ4plex)                                 | 1750.04459 | 59 | 54 |      | 4.45 | Expt2 |
| ASGQAFELISPR            | 7  | 149252580;9789995                                                                              | N-Term(iTRAQ4plex)                                                  | 1532.85698 | 59 | 76 |      | 5.69 | Expt2 |
| AENILLTVLER             | 3  | 229576965                                                                                      | N-Term(iTRAQ4plex)                                                  | 1414.84319 | 59 | 42 |      | 3.84 | Expt2 |
| VLCVINPGNPTGVQVTR       | 12 | 33413404                                                                                       | N-Term(iTRAQ4plex), C3(Methylthio)                                  | 1986.04534 | 59 | 85 |      | 4.53 | Expt2 |
| DFEOPLAISR              | 14 | 158635992                                                                                      | N-Term(iTRAQ4plex)                                                  | 1319.70720 | 59 | 50 |      | 3.96 | Expt2 |
| DGNGFVSAELR             | 25 | 13386230                                                                                       | N-Term(iTRAQ4plex), N3(Deamidated)                                  | 1380.68718 | 59 | 75 |      | 3.91 | Expt2 |
| MFVLDEADEMLSR           | 14 | 176865892;21450625;176866061;149270417;226823309;176865998                                     | N-Term(iTRAQ4plex), M1(Oxidation), M10(Oxidation)                   | 1731.80783 | 59 | 82 |      | 4.07 | Expt2 |
| AGVATPGLTEDQLWR         | 7  | 16716499                                                                                       | N-Term(iTRAQ4plex)                                                  | 1757.93279 | 59 | 74 |      | 4.60 | Expt2 |
| VEGPAFTDAIR             | 6  | 22122641                                                                                       | N-Term(iTRAQ4plex)                                                  | 1319.70867 | 59 | 58 |      | 4.11 | Expt2 |
| ASDLDDGLTATR            | 5  | 6677691                                                                                        | N-Term(iTRAQ4plex)                                                  | 1378.69390 | 59 | 53 |      | 4.27 | Expt2 |
| GATTTFSAYER             | 20 | 9789943                                                                                        | N-Term(iTRAQ4plex)                                                  | 1283.67119 | 59 | 62 |      | 4.95 | Expt2 |
| LITPAVVSER              | 11 | 28372479;20846986;149255974;149258948;149259193;94393570;82959262                              | N-Term(iTRAQ4plex)                                                  | 1228.73882 | 59 | 44 |      |      | Expt2 |
| LITPAVVSOR              | 11 | 82943174                                                                                       | N-Term(iTRAQ4plex), O9(Deamidated)                                  | 1228.73882 | 59 | 44 |      |      | Expt2 |
| VIFLEDDVAAVVDGR         | 6  | 7305085                                                                                        | N-Term(iTRAQ4plex)                                                  | 1876.98625 | 59 | 97 |      | 5.04 | Expt2 |
| FVLINWGTGEGVNDVRR       | 11 | 7304993;226423871;226423873                                                                    | N-Term(iTRAQ4plex)                                                  | 1862.99553 | 59 | 81 | 1.14 | 4.61 | Expt2 |
| NLVALDEDDGSPAAAR        | 3  | 187173282                                                                                      | N-Term(iTRAQ4plex)                                                  | 1858.88970 | 59 | 81 |      | 4.42 | Expt2 |
| GDLDAAGPNLEGDFK         | 6  | 61743961                                                                                       | N-Term(iTRAQ4plex), K15(iTRAQ4plex)                                 | 1806.91936 | 59 | 73 |      | 4.70 | Expt2 |
| MCDLVSDFDGFSER          | 11 | 31560737                                                                                       | N-Term(iTRAQ4plex), C2(Methylthio)                                  | 1810.76421 | 59 | 55 | 1.19 | 4.16 | Expt2 |
| YSYDESQGEIYR            | 3  | 149269417;19526994                                                                             | N-Term(iTRAQ4plex)                                                  | 1816.81401 | 59 | 48 |      | 3.81 | Expt2 |

|                           |     |                                       |                                                      |            |    |    |       |       |       |
|---------------------------|-----|---------------------------------------|------------------------------------------------------|------------|----|----|-------|-------|-------|
| EEIFGPMQILK               | 6   | 6753036                               | N-Term(iTRAQ4plex), K12(iTRAQ4plex)                  | 1691.97099 | 59 | 71 | 3.84  | Expt2 |       |
| WFLTCINPOFR               | 14  | 110625979                             | N-Term(iTRAQ4plex), C5(Methylthio)                   | 1742.86814 | 59 | 62 | 4.25  | Expt2 |       |
| MLEELEAMR                 | 7   | 82950147;149264086                    | N-Term(iTRAQ4plex)                                   | 1394.67766 | 59 | 45 | 4.13  | Expt2 |       |
| VGLPLVPVFPSEGYR           | 8   | 21040233                              | N-Term(iTRAQ4plex)                                   | 1771.99114 | 59 | 48 | 4.06  | Expt2 |       |
| EYVEGEVTELTPCETENPMGGYVK  | 3   | 9790083                               | N-Term(iTRAQ4plex), C13(Methylthio), K24(iTRAQ4plex) | 2966.33933 | 59 | 78 | 5.66  | Expt2 |       |
| EIPVLNLELPVMVAR           | 4   | 229092758                             | N-Term(iTRAQ4plex)                                   | 1821.05022 | 59 | 66 | 3.75  | Expt2 |       |
| DPETGFVMLQLAGK            | 10  | 37537522                              | N-Term(iTRAQ4plex), K14(iTRAQ4plex)                  | 1857.97527 | 59 | 85 | 4.24  | Expt2 |       |
| TDITYPAGFMDVISDK          | 3   | 6677805                               | N-Term(iTRAQ4plex), K17(iTRAQ4plex)                  | 2174.13262 | 59 | 74 | 5.15  | Expt2 |       |
| GASYLLMGQVEENR            | 13  | 125490382                             | N-Term(iTRAQ4plex)                                   | 1710.86333 | 59 | 90 | 5.34  | Expt2 |       |
| AEEALNLLMOR               | 3   | 23346525                              | N-Term(iTRAQ4plex)                                   | 1431.77605 | 59 | 62 | 4.30  | Expt2 |       |
| ALAAGGVGSIVR              | 9   | 224809382                             | N-Term(iTRAQ4plex)                                   | 1214.73467 | 59 | 48 | 3.64  | Expt2 |       |
| SDGSLMFQQVPMVEIDGMK       | 5   | 31981724                              | N-Term(iTRAQ4plex), K19(iTRAQ4plex)                  | 2400.18784 | 59 | 41 | 6.02  | Expt2 |       |
| FVNVVPTFGK                | 2   | 149268015;149268096                   | N-Term(iTRAQ4plex), K10(iTRAQ4plex)                  | 1395.82536 | 59 | 60 | Expt2 |       |       |
| LAAIOESGVER               | 3   | 238231384                             | N-Term(iTRAQ4plex)                                   | 1316.73088 | 59 | 50 | 4.08  | Expt2 |       |
| SGASLLSNMSR               | 5   | 9790161                               | N-Term(iTRAQ4plex)                                   | 1266.66191 | 59 | 68 | 4.02  | Expt2 |       |
| AQYEDIANR                 | 48  | 29789317;20911031;114145561;269914154 | N-Term(iTRAQ4plex)                                   | 1223.61870 | 59 | 57 | 3.70  | Expt2 |       |
| LNLYDILLR                 | 8   | 31982236                              | N-Term(iTRAQ4plex)                                   | 1276.77532 | 59 | 38 | 3.79  | Expt2 |       |
| AAYEAELGDAR               | 25  | 162287370;161760667                   | N-Term(iTRAQ4plex)                                   | 1309.65300 | 59 | 66 | 4.35  | Expt2 |       |
| IEVLEELER                 | 24  | 82950147;82950149;149264086           | N-Term(iTRAQ4plex)                                   | 1273.71587 | 59 | 54 | 3.70  | Expt2 |       |
| IOVLEEQLR                 | 22  | 94379744                              | N-Term(iTRAQ4plex), Q2(Deamidated), Q7(Deamidated)   | 1273.71587 | 59 | 54 | 3.70  | Expt2 |       |
| GEVITTYCPANNEPIAR         | 5   | 188219757;188035915                   | N-Term(iTRAQ4plex), C8(Methylthio)                   | 2037.98699 | 58 | 87 | 3.94  | Expt2 |       |
| DVDEVSSLLR                | 11  | 126723461                             | N-Term(iTRAQ4plex)                                   | 1276.69060 | 58 | 59 | 3.56  | Expt2 |       |
| ALSQPDTVLR                | 6   | 31981748;285402638;285402659          | N-Term(iTRAQ4plex)                                   | 1243.71343 | 58 | 45 | 3.93  | Expt2 |       |
| ISGETIFVTAPHEATAGIIGVNR   | 6   | 51491845                              | N-Term(iTRAQ4plex)                                   | 2497.35532 | 58 | 61 | 6.16  | Expt2 |       |
| IDPVYFDDNWLNR             | 3   | 46559745                              | N-Term(iTRAQ4plex)                                   | 1810.89250 | 58 | 45 | 3.90  | Expt2 |       |
| IVYSPVAGTRPSEIVVPGNTR     | 11  | 111074529                             | N-Term(iTRAQ4plex)                                   | 2443.34269 | 58 | 38 | 4.00  | Expt2 |       |
| ELISQFLNLR                | 13  | 6678085                               | N-Term(iTRAQ4plex)                                   | 1376.80290 | 58 | 56 | 4.30  | Expt2 |       |
| MSINAEDVVVGDLEVEK         | 7   | 21450277                              | N-Term(iTRAQ4plex), K17(iTRAQ4plex)                  | 2105.14853 | 58 | 58 | 5.03  | Expt2 |       |
| ETMONLNDLR                | 41  | 149262636;154090941;118130981         | N-Term(iTRAQ4plex)                                   | 1264.61040 | 58 | 54 | 4.47  | Expt2 |       |
| GFGGIGGILR                | 6   | 124286826                             | N-Term(iTRAQ4plex)                                   | 1090.65325 | 58 | 49 | 3.57  | Expt2 |       |
| GEGWGDPCLECLPTPEAFR       | 9   | 118197277                             | N-Term(iTRAQ4plex), C8(Methylthio), C11(Methylthio)  | 2443.98076 | 58 | 87 | 5.53  | Expt2 |       |
| FIIPNIVK                  | 12  | 6754524                               | N-Term(iTRAQ4plex), K8(iTRAQ4plex)                   | 1231.80730 | 58 | 38 | Expt2 |       |       |
| ALESSIAPVIFASNR           | 8   | 9790083                               | N-Term(iTRAQ4plex)                                   | 1832.04197 | 58 | 63 | 4.82  | Expt2 |       |
| MEGGSTEIGAQMPSLEGGLSTSDMK | 5   | 61743961                              | N-Term(iTRAQ4plex), K25(iTRAQ4plex)                  | 2801.33127 | 58 | 61 | 5.26  | Expt2 |       |
| TLGDQLSLLGAR              | 3   | 113930720                             | N-Term(iTRAQ4plex)                                   | 1500.88664 | 58 | 93 | 4.33  | Expt2 |       |
| LAEMPADSGYPAYLGAR         | 7   | 31560731                              | N-Term(iTRAQ4plex)                                   | 1925.95806 | 58 | 73 | 4.29  | Expt2 |       |
| DOVDSAVOELLQLK            | 10  | 94364712;82617575                     | N-Term(iTRAQ4plex), K14(iTRAQ4plex)                  | 1874.05442 | 58 | 58 | 5.15  | Expt2 |       |
| DCDLDVACR                 | 104 | 163310769;75677435                    | N-Term(iTRAQ4plex), C2(Methylthio), C8(Methylthio)   | 1245.48284 | 58 | 56 | 4.04  | Expt2 |       |
| GPSGPOGIR                 | 7   | 111120329                             | N-Term(iTRAQ4plex)                                   | 1012.56822 | 58 | 42 | 3.49  | Expt2 |       |
| LTEQVFNEAPGIR             | 6   | 33413404                              | N-Term(iTRAQ4plex)                                   | 1617.87187 | 58 | 60 | 5.17  | Expt2 |       |
| LLOVTPDTSGEVYVCR          | 12  | 149253040;183979966                   | N-Term(iTRAQ4plex), C14(Methylthio)                  | 1870.92021 | 58 | 77 | 1.42  | 4.23  | Expt2 |
| SEIDLFNIR                 | 32  | 6753060                               | N-Term(iTRAQ4plex)                                   | 1250.68840 | 58 | 49 | 4.33  | Expt2 |       |
| IDEPLEGSEDR               | 16  | 13384620                              | N-Term(iTRAQ4plex)                                   | 1403.68291 | 58 | 66 | 3.87  | Expt2 |       |
| GTHIELSDVQLIK             | 11  | 94369748;6671569                      | N-Term(iTRAQ4plex), K13(iTRAQ4plex)                  | 1717.04277 | 58 | 91 | 4.93  | Expt2 |       |
| ASEQIYGSPPSSPYECLR        | 5   | 118601017                             | N-Term(iTRAQ4plex), C16(Methylthio)                  | 2163.98125 | 58 | 66 | 5.19  | Expt2 |       |
| TSATWFFALSR               | 4   | 21450277                              | N-Term(iTRAQ4plex)                                   | 1283.68682 | 58 | 52 | 4.03  | Expt2 |       |
| LDVTIILSPSR               | 5   | 145966915                             | N-Term(iTRAQ4plex)                                   | 1244.73674 | 58 | 43 | Expt2 |       |       |
| SMLEVNYPMEINGIVR          | 8   | 22122825                              | N-Term(iTRAQ4plex), N11(Deamidated)                  | 1896.93425 | 58 | 73 | 4.80  | Expt2 |       |
| DFADMPNLR                 | 27  | 6679166                               | N-Term(iTRAQ4plex)                                   | 1222.60059 | 58 | 43 | 3.66  | Expt2 |       |
| NLDLDGIIAEVR              | 4   | 133778953                             | N-Term(iTRAQ4plex)                                   | 1471.82535 | 58 | 62 | 3.54  | Expt2 |       |
| DLGEELEALR                | 9   | 29336026                              | N-Term(iTRAQ4plex)                                   | 1288.68620 | 58 | 53 | 3.76  | Expt2 |       |
| LLDAVDTYIIPVPTR           | 7   | 149258822;27370092;254911131          | N-Term(iTRAQ4plex)                                   | 1716.97038 | 58 | 86 | 0.99  | 4.44  | Expt2 |
| FTOVITANSFK               | 10  | 111074529                             | N-Term(iTRAQ4plex), N7(Deamidated), K10(iTRAQ4plex)  | 1431.77056 | 58 | 78 | 3.56  | Expt2 |       |
| VGEOAQVVIIDMNDPSNPIR      | 7   | 51491845                              | N-Term(iTRAQ4plex), M12(Oxidation)                   | 2355.21347 | 58 | 43 | 1.21  | 4.80  | Expt2 |
| FDEFFSQGCAPGYEK           | 17  | 20330802                              | N-Term(iTRAQ4plex), C9(Methylthio), K15(iTRAQ4plex)  | 2058.92685 | 58 | 55 | 5.72  | Expt2 |       |



|                          |    |                                                  |                                                                    |            |    |     |      |      |       |
|--------------------------|----|--------------------------------------------------|--------------------------------------------------------------------|------------|----|-----|------|------|-------|
| YQTLPSLEVTOTGSK          | 9  | 110625833                                        | N-Term(iTRAQ4plex), K16(iTRAQ4plex)                                | 1997.08440 | 58 | 96  |      | 4.83 | Expt2 |
| EVDVYSLR                 | 2  | 28202071;197313683;28461294                      | N-Term(iTRAQ4plex)                                                 | 1082.56194 | 58 | 34  |      |      | Expt2 |
| SNMNDMFEYINLNR           | 9  | 114145561                                        | N-Term(iTRAQ4plex)                                                 | 1991.90886 | 58 | 115 |      | 4.95 | Expt2 |
| GLLSQGSPLSWEETQR         | 2  | 33468897                                         | N-Term(iTRAQ4plex)                                                 | 1931.99736 | 58 | 82  |      |      | Expt2 |
| OPEGTGMIDEFTVAR          | 3  | 61657921                                         | N-Term(iTRAQ4plex)                                                 | 1923.92461 | 58 | 82  |      | 4.07 | Expt2 |
| DLGAOGVAEAEAEAOOR        | 9  | 124487155                                        | N-Term(iTRAQ4plex)                                                 | 1942.99472 | 58 | 81  |      | 5.93 | Expt2 |
| TPYLPQDPTYSSLDR          | 2  | 94379918;58082069                                | N-Term(iTRAQ4plex)                                                 | 1912.97893 | 58 | 63  |      |      | Expt2 |
| GVSLAPPGTPAPLDSPAR       | 6  | 153791477                                        | N-Term(iTRAQ4plex)                                                 | 1847.01921 | 58 | 57  |      | 3.80 | Expt2 |
| ISOTNVIPTQDDVLR          | 5  | 33563256                                         | N-Term(iTRAQ4plex)                                                 | 1920.03020 | 58 | 39  |      | 3.90 | Expt2 |
| AGCCVWVAPSDMDGR          | 3  | 34328485                                         | N-Term(iTRAQ4plex), C3(Methylthio)                                 | 1726.74895 | 58 | 61  |      | 4.39 | Expt2 |
| GSPLAEGPOAFFPER          | 10 | 94379918;58082069                                | N-Term(iTRAQ4plex)                                                 | 1746.89433 | 58 | 76  |      | 4.62 | Expt2 |
| ENENVINEYSSILEDQR        | 3  | 33859809                                         | N-Term(iTRAQ4plex)                                                 | 2196.05669 | 58 | 55  |      | 4.48 | Expt2 |
| LSSFIGAIAIGDLVK          | 3  | 126521835                                        | N-Term(iTRAQ4plex), K15(iTRAQ4plex)                                | 1792.08725 | 58 | 59  |      | 4.20 | Expt2 |
| GYAFIEFASFEDAK           | 5  | 84875537                                         | N-Term(iTRAQ4plex), K14(iTRAQ4plex)                                | 1882.95426 | 58 | 64  |      | 4.17 | Expt2 |
| YGAFVKPSAVTVGDPEEDYGLDEM | 2  | 170650659                                        | N-Term(iTRAQ4plex), K6(iTRAQ4plex)                                 | 3024.45462 | 58 | 43  |      |      | Expt2 |
| LIATFPDILTYSAIR          | 13 | 31982236                                         | N-Term(iTRAQ4plex)                                                 | 1876.00224 | 58 | 71  |      | 4.09 | Expt2 |
| LATGSDDNCAAFFGPPFK       | 12 | 6755995                                          | N-Term(iTRAQ4plex), C9(Methylthio), K19(iTRAQ4plex)                | 2321.08939 | 58 | 47  |      | 5.40 | Expt2 |
| VFSVAGLSSDDPLGPAHVTVIAR  | 5  | 21311891                                         | N-Term(iTRAQ4plex)                                                 | 2817.45481 | 58 | 64  |      | 5.06 | Expt2 |
| VTAYTVDVTGR              | 4  | 61743961                                         | N-Term(iTRAQ4plex)                                                 | 1325.72173 | 58 | 57  |      | 3.87 | Expt2 |
| EEIFPVQQIMK              | 19 | 7106242;85861182                                 | N-Term(iTRAQ4plex), K12(iTRAQ4plex)                                | 1706.94707 | 58 | 70  |      | 4.32 | Expt2 |
| LPLQDVYK                 | 7  | 126032329;6681273                                | N-Term(iTRAQ4plex), K8(iTRAQ4plex)                                 | 1263.75969 | 58 | 66  |      |      | Expt2 |
| YLLEQDFPGMR              | 6  | 215983062;31981592                               | N-Term(iTRAQ4plex)                                                 | 1512.76494 | 58 | 44  |      | 3.84 | Expt2 |
| LPEGQLPEAELPAK           | 8  | 149263538                                        | N-Term(iTRAQ4plex), K15(iTRAQ4plex)                                | 1851.04648 | 58 | 46  |      | 4.73 | Expt2 |
| DWVIPPISCENЕК            | 7  | 6753374                                          | N-Term(iTRAQ4plex), C9(Methylthio), K14(iTRAQ4plex)                | 1960.97293 | 58 | 57  |      | 4.36 | Expt2 |
| VTIMWTPPDSVVGYSR         | 8  | 46849812                                         | N-Term(iTRAQ4plex)                                                 | 1952.01018 | 58 | 58  | 0.98 | 4.01 | Expt2 |
| IDIHNPQER                | 20 | 40556608                                         | N-Term(iTRAQ4plex)                                                 | 1338.75029 | 58 | 38  |      |      | Expt2 |
| AVASLNTPFMPDPDVPMPK      | 3  | 31982393                                         | N-Term(iTRAQ4plex), K20(iTRAQ4plex)                                | 2402.23642 | 58 | 63  |      | 5.32 | Expt2 |
| VINLIDSK                 | 17 | 163310769                                        | N-Term(iTRAQ4plex), K8(iTRAQ4plex)                                 | 1189.74480 | 58 | 56  | 1.14 | 3.42 | Expt2 |
| EGMNIVEAMER              | 26 | 6679439                                          | N-Term(iTRAQ4plex), M3(Oxidation)                                  | 1438.67888 | 58 | 54  |      | 3.67 | Expt2 |
| ELLIFNQOQVPSGESALDR      | 8  | 20806109                                         | N-Term(iTRAQ4plex)                                                 | 2401.29563 | 58 | 50  |      | 5.57 | Expt2 |
| TIAMDGTGLVLR             | 5  | 31980648                                         | N-Term(iTRAQ4plex), M4(Oxidation)                                  | 1422.73857 | 58 | 55  |      | 3.67 | Expt2 |
| IGIIGGTGLDDPEILEGR       | 12 | 45544618                                         | N-Term(iTRAQ4plex)                                                 | 1969.07768 | 58 | 95  |      | 4.39 | Expt2 |
| EGALCEENMR               | 6  | 149253258;33859482                               | N-Term(iTRAQ4plex), C5(Methylthio)                                 | 1341.57207 | 57 | 54  |      | 3.85 | Expt2 |
| DGNLMFDOVPMVEIDGMK       | 14 | 149259801;149260087;169808401;50263046;154350202 | N-Term(iTRAQ4plex), K18(iTRAQ4plex)                                | 2327.13425 | 57 | 51  |      | 5.19 | Expt2 |
| LQDAEIAR                 | 29 | 6755392                                          | N-Term(iTRAQ4plex)                                                 | 1059.59265 | 57 | 46  |      | 3.88 | Expt2 |
| YDEMVESMK                | 3  | 226874906                                        | N-Term(iTRAQ4plex), K9(iTRAQ4plex)                                 | 1419.67815 | 57 | 59  |      | 3.96 | Expt2 |
| TNEAQAIETAR              | 7  | 18017605;149262987;83003306                      | N-Term(iTRAQ4plex)                                                 | 1347.69682 | 57 | 69  |      | 4.52 | Expt2 |
| DLLVQASQCLSK             | 7  | 149270322;124487099                              | N-Term(iTRAQ4plex), C10(Methylthio), K13(iTRAQ4plex)               | 1766.94120 | 57 | 53  |      | 5.41 | Expt2 |
| FSSEFELQOLEQFK           | 4  | 225637487                                        | N-Term(iTRAQ4plex), K14(iTRAQ4plex)                                | 2048.06522 | 57 | 49  |      | 4.08 | Expt2 |
| AQLGVOAFADALLIIPK        | 3  | 6753324                                          | N-Term(iTRAQ4plex), K17(iTRAQ4plex)                                | 2056.24051 | 57 | 48  |      | 3.99 | Expt2 |
| TPDQIMELFDSITYSK         | 3  | 225637487                                        | N-Term(iTRAQ4plex), K16(iTRAQ4plex)                                | 2176.11161 | 57 | 42  |      | 5.39 | Expt2 |
| ETLLDAIR                 | 4  | 226423922                                        | N-Term(iTRAQ4plex)                                                 | 1074.62700 | 57 | 40  |      |      | Expt2 |
| TIPTDDNVCFTR             | 3  | 170650621                                        | N-Term(iTRAQ4plex), C10(Methylthio)                                | 1670.80083 | 57 | 48  |      | 3.92 | Expt2 |
| FLILPDMLK                | 7  | 13385598                                         | N-Term(iTRAQ4plex), K9(iTRAQ4plex)                                 | 1377.84734 | 57 | 61  |      |      | Expt2 |
| DVEDESTGLEK              | 3  | 6678103                                          | N-Term(iTRAQ4plex), K11(iTRAQ4plex)                                | 1509.76152 | 57 | 49  |      | 4.06 | Expt2 |
| VIPLFPQCR                | 46 | 31560625                                         | N-Term(iTRAQ4plex), C9(Methylthio)                                 | 1375.77214 | 57 | 43  |      | 3.77 | Expt2 |
| FGPYTTEPVIAGLDPK         | 6  | 6755202                                          | N-Term(iTRAQ4plex), K16(iTRAQ4plex)                                | 2055.10820 | 57 | 66  |      | 4.88 | Expt2 |
| GVAGAPPTVTLR             | 13 | 124494256                                        | N-Term(iTRAQ4plex)                                                 | 1395.84502 | 57 | 44  |      | 4.02 | Expt2 |
| GSEGOQVGR                | 8  | 34328108                                         | N-Term(iTRAQ4plex)                                                 | 1030.54241 | 57 | 50  |      |      | Expt2 |
| SIPMTVDFIR               | 2  | 96975138                                         | N-Term(iTRAQ4plex)                                                 | 1322.72624 | 57 | 50  |      |      | Expt2 |
| APDFVFYAPR               | 19 | 149266483;157277952;70778915;157277948           | N-Term(iTRAQ4plex)                                                 | 1326.69597 | 57 | 49  |      | 4.27 | Expt2 |
| DVMICPDTSLLEDAK          | 8  | 55741460                                         | N-Term(iTRAQ4plex), M3(Oxidation), C5(Methylthio), K14(iTRAQ4plex) | 1886.88164 | 57 | 74  |      | 4.23 | Expt2 |
| GWLADGTR                 | 3  | 31560625                                         | N-Term(iTRAQ4plex)                                                 | 1033.57842 | 57 | 47  |      |      | Expt2 |
| SLLVTELSSSR              | 5  | 31980942                                         | N-Term(iTRAQ4plex)                                                 | 1305.74809 | 57 | 54  |      | 3.60 | Expt2 |

|                               |    |                                         |                                                                     |            |    |     |      |       |
|-------------------------------|----|-----------------------------------------|---------------------------------------------------------------------|------------|----|-----|------|-------|
| AGGSASAMLOPLLDNQVGFK          | 3  | 7242197                                 | N-Term(iTRAQ4plex), M8(Oxidation), K20(iTRAQ4plex)                  | 2308.22898 | 57 | 61  | 5.25 | Expt2 |
| QITVNDLPVGR                   | 26 | 148747558                               | N-Term(iTRAQ4plex)                                                  | 1355.78166 | 57 | 58  | 4.18 | Expt2 |
| GYFIQPTVFGDVK                 | 16 | 6753036                                 | N-Term(iTRAQ4plex), K13(iTRAQ4plex)                                 | 1758.96770 | 57 | 71  | 4.64 | Expt2 |
| YLGAEYMQSVGNMR                | 12 | 20330802                                | N-Term(iTRAQ4plex)                                                  | 1762.83940 | 57 | 61  | 4.73 | Expt2 |
| SPGODPIPIVLR                  | 9  | 225543424;225543420                     | N-Term(iTRAQ4plex)                                                  | 1435.84172 | 57 | 60  | 3.67 | Expt2 |
| ALDVNVALR                     | 3  | 149260240                               | N-Term(iTRAQ4plex)                                                  | 1114.67327 | 57 | 51  |      | Expt2 |
| AEILSNWNMFVGSQATNYGEDLTR      | 3  | 188035858                               | N-Term(iTRAQ4plex)                                                  | 2860.37418 | 57 | 100 | 5.83 | Expt2 |
| LAVSQVPR                      | 83 | 6678359                                 | N-Term(iTRAQ4plex)                                                  | 1013.62438 | 57 | 45  |      | Expt2 |
| YTMGDAPDFDR                   | 4  | 6754084                                 | N-Term(iTRAQ4plex), M3(Oxidation)                                   | 1447.62749 | 57 | 37  |      | Expt2 |
| TCQDINECETTNECR               | 7  | 149261823;164607147                     | N-Term(iTRAQ4plex), C2(Methylthio), C8(Methylthio), C14(Methylthio) | 2040.73577 | 57 | 86  | 5.19 | Expt2 |
| OQGLGPMNLIPLSDPK              | 9  | 94400195;149267887;6754976              | N-Term(iTRAQ4plex), K16(iTRAQ4plex)                                 | 1925.08354 | 57 | 62  | 4.71 | Expt2 |
| YLSPDATVSTEV                  | 16 | 160707889                               | N-Term(iTRAQ4plex)                                                  | 1581.82878 | 57 | 59  | 4.50 | Expt2 |
| GIYMWVDEGR                    | 8  | 8393866                                 | N-Term(iTRAQ4plex)                                                  | 1369.66948 | 57 | 65  | 4.01 | Expt2 |
| TEFNLNQYR                     | 64 | 111074529                               | N-Term(iTRAQ4plex)                                                  | 1491.73747 | 57 | 53  | 4.60 | Expt2 |
| VVTDDETELAR                   | 5  | 13385624                                | N-Term(iTRAQ4plex)                                                  | 1492.76286 | 57 | 66  | 4.13 | Expt2 |
| GGGGFGGPGGGLQSGQTIALPAQGLIEFR | 8  | 6755252                                 | N-Term(iTRAQ4plex)                                                  | 2997.57383 | 57 | 87  | 5.60 | Expt2 |
| ELLVNLNPIAQLASR               | 7  | 13386120                                | N-Term(iTRAQ4plex)                                                  | 1892.11374 | 57 | 54  | 4.65 | Expt2 |
| EDLTAAMLIVK                   | 32 | 148277039                               | N-Term(iTRAQ4plex), K11(iTRAQ4plex)                                 | 1491.87444 | 57 | 91  | 4.88 | Expt2 |
| EMFPYEASTPTGISASCR            | 13 | 121949767;121949763;121949765;121949769 | N-Term(iTRAQ4plex), C17(Methylthio)                                 | 2136.95488 | 57 | 95  | 4.90 | Expt2 |
| ASAPATPLSPTR                  | 13 | 188219589                               | N-Term(iTRAQ4plex)                                                  | 1312.73577 | 57 | 66  | 4.16 | Expt2 |
| AQEAAAEEPPPAVTPAASVSALDLGEQR  | 3  | 225703070                               | N-Term(iTRAQ4plex)                                                  | 2919.48667 | 57 | 76  | 4.77 | Expt2 |
| IDTIEIITDR                    | 35 | 149274531;32880197;109134362            | N-Term(iTRAQ4plex)                                                  | 1332.75151 | 57 | 54  | 4.35 | Expt2 |
| GLLADNLIR                     | 14 | 161016833                               | N-Term(iTRAQ4plex)                                                  | 1128.68926 | 57 | 54  | 3.80 | Expt2 |
| DSYLILELTPTEYDSR              | 5  | 228008337                               | N-Term(iTRAQ4plex)                                                  | 2059.04082 | 57 | 64  | 4.13 | Expt2 |
| FSVEEIIQK                     | 3  | 31980632                                | N-Term(iTRAQ4plex), K9(iTRAQ4plex)                                  | 1380.80571 | 57 | 51  | 3.96 | Expt2 |
| AFGYYGPLR                     | 10 | 8567402;149251459;149266618             | N-Term(iTRAQ4plex)                                                  | 1187.63310 | 57 | 48  |      | Expt2 |
| LAMQEFMLPVGASSFR              | 7  | 149249466;149253386                     | N-Term(iTRAQ4plex), M3(Oxidation), M7(Oxidation)                    | 2073.06987 | 57 | 64  | 3.87 | Expt2 |
| FSPMLTAELGTR                  | 3  | 88758582;88758584                       | N-Term(iTRAQ4plex)                                                  | 1523.80388 | 57 | 64  | 3.69 | Expt2 |
| IMPPALALQLR                   | 7  | 8394362                                 | N-Term(iTRAQ4plex)                                                  | 1366.83611 | 57 | 54  | 3.47 | Expt2 |
| ADMVETQQLMR                   | 3  | 55742711                                | N-Term(iTRAQ4plex)                                                  | 1465.72576 | 57 | 46  | 3.66 | Expt2 |
| GISQEQMNEFR                   | 4  | 61097906                                | N-Term(iTRAQ4plex)                                                  | 1482.71257 | 56 | 56  | 4.30 | Expt2 |
| SIPAYLAETLYAMK                | 8  | 6753060                                 | N-Term(iTRAQ4plex), M14(Oxidation), K15(iTRAQ4plex)                 | 2038.08286 | 56 | 67  | 6.89 | Expt2 |
| APILIATDVASR                  | 15 | 40068493;93587673;40068491;83816893     | N-Term(iTRAQ4plex)                                                  | 1370.81694 | 56 | 63  | 3.84 | Expt2 |
| AITGASLADIMAK                 | 6  | 18250296;94386657                       | N-Term(iTRAQ4plex), K13(iTRAQ4plex)                                 | 1549.89104 | 56 | 104 | 4.24 | Expt2 |
| IFGVTITLDIR                   | 11 | 31982186                                | N-Term(iTRAQ4plex)                                                  | 1377.82610 | 56 | 65  | 3.94 | Expt2 |
| ELPDSVPQECTVR                 | 4  | 149270772;149270774;153791796           | N-Term(iTRAQ4plex), C10(Methylthio)                                 | 1662.79436 | 56 | 59  | 3.94 | Expt2 |
| LGESVQDLSSFDYSSSELK           | 3  | 31981588                                | N-Term(iTRAQ4plex), K19(iTRAQ4plex)                                 | 2421.19846 | 56 | 71  | 4.95 | Expt2 |
| EVGIPPEOSLETAK                | 3  | 52345394;23956222                       | N-Term(iTRAQ4plex), K14(iTRAQ4plex)                                 | 1785.98320 | 56 | 51  |      | Expt2 |
| SVPADIFMQAATTR                | 18 | 6753824                                 | N-Term(iTRAQ4plex), M9(Oxidation)                                   | 1724.87724 | 56 | 65  | 4.55 | Expt2 |
| ADLNNLGTIAK                   | 13 | 40556608;6754254                        | N-Term(iTRAQ4plex), K12(iTRAQ4plex)                                 | 1530.90996 | 56 | 108 | 4.57 | Expt2 |
| STNGDTFLGGEDFDQALLR           | 12 | 162461907                               | N-Term(iTRAQ4plex), N3(Deamidated)                                  | 2201.05295 | 56 | 105 | 5.62 | Expt2 |
| VLDLDFR                       | 6  | 33468931                                | N-Term(iTRAQ4plex)                                                  | 1134.66570 | 56 | 42  |      | Expt2 |
| FNVSATPEQVVPYSTTR             | 3  | 27228985                                | N-Term(iTRAQ4plex)                                                  | 2104.05083 | 56 | 59  | 4.25 | Expt2 |
| LEAALADVPELAR                 | 3  | 17975508                                | N-Term(iTRAQ4plex)                                                  | 1511.85893 | 56 | 64  | 4.61 | Expt2 |
| VFLENVIR                      | 44 | 149263932;94378251                      | N-Term(iTRAQ4plex)                                                  | 1133.68030 | 56 | 59  |      | Expt2 |
| QEOSLPIDENQLSLEMNK            | 3  | 31543255                                | N-Term(iTRAQ4plex), K18(iTRAQ4plex)                                 | 2404.23410 | 56 | 64  | 4.39 | Expt2 |
| ESYPVYFLFR                    | 7  | 19526463                                | N-Term(iTRAQ4plex)                                                  | 1464.76299 | 56 | 47  | 4.38 | Expt2 |
| MIDLSGNPVL                    | 3  | 21362277                                | N-Term(iTRAQ4plex)                                                  | 1358.75847 | 56 | 48  | 3.72 | Expt2 |
| MEDGVGLCLETAEAK               | 3  | 114326446                               | N-Term(iTRAQ4plex), C7(Methylthio), K15(iTRAQ4plex)                 | 1915.87333 | 56 | 43  | 4.13 | Expt2 |
| DLMVGEASELR                   | 6  | 22122825                                | N-Term(iTRAQ4plex), M3(Oxidation)                                   | 1494.72283 | 56 | 57  | 3.56 | Expt2 |
| ELVFYLLMMAK                   | 16 | 148277039                               | N-Term(iTRAQ4plex), M8(Oxidation), K11(iTRAQ4plex)                  | 1711.90947 | 56 | 75  | 3.96 | Expt2 |
| QGVDEFAYTLVR                  | 3  | 194440734;149251704;111154109           | N-Term(iTRAQ4plex)                                                  | 1541.80693 | 56 | 64  | 4.36 | Expt2 |
| LTDGFCQAITPEQSK               | 5  | 117606272;112181194;46559406            | N-Term(iTRAQ4plex), C7(Methylthio), K16(iTRAQ4plex)                 | 2119.04660 | 56 | 65  | 5.39 | Expt2 |
| NMODLVEDYK                    | 3  | 20911031                                | N-Term(iTRAQ4plex), M2(Oxidation), K10(iTRAQ4plex)                  | 1558.77397 | 56 | 50  |      | Expt2 |

|                                  |     |                                                                                            |                                                                     |            |    |     |      |      |       |
|----------------------------------|-----|--------------------------------------------------------------------------------------------|---------------------------------------------------------------------|------------|----|-----|------|------|-------|
| LLSDMWASK                        | 4   | 9790161                                                                                    | N-Term(iTRAQ4plex), K10(iTRAQ4plex)                                 | 1451.82561 | 56 | 70  | 0.99 | 3.87 | Expt2 |
| VAIITDQK                         | 9   | 111074529                                                                                  | N-Term(iTRAQ4plex), K9(iTRAQ4plex)                                  | 1217.77287 | 56 | 70  | 0.99 | 3.82 | Expt2 |
| DLAVAGPEMQVK                     | 5   | 239052674                                                                                  | N-Term(iTRAQ4plex), K12(iTRAQ4plex)                                 | 1545.85198 | 56 | 76  |      | 4.42 | Expt2 |
| EVMOEVAQLSDFDEELYK               | 3   | 33468931                                                                                   | N-Term(iTRAQ4plex), K18(iTRAQ4plex)                                 | 2474.24320 | 56 | 76  |      | 5.57 | Expt2 |
| GIFNGFSITLK                      | 10  | 149258501;19526818                                                                         | N-Term(iTRAQ4plex), N4(Deamidated), K11(iTRAQ4plex)                 | 1485.86138 | 56 | 66  |      | 4.07 | Expt2 |
| IILDLISESPK                      | 6   | 13384620                                                                                   | N-Term(iTRAQ4plex), K12(iTRAQ4plex)                                 | 1629.01389 | 56 | 52  |      | 3.90 | Expt2 |
| VGEGPGVWLAPEQTAGK                | 4   | 227499103;227499234                                                                        | N-Term(iTRAQ4plex), C8(Methylthio), K18(iTRAQ4plex)                 | 2133.07280 | 56 | 73  |      | 4.69 | Expt2 |
| AVNECPTTIR                       | 13  | 160707889                                                                                  | N-Term(iTRAQ4plex), C6(Methylthio)                                  | 1422.68437 | 56 | 53  |      | 3.95 | Expt2 |
| FOVNDNDQLLQR                     | 115 | 148277039                                                                                  | N-Term(iTRAQ4plex), N4(Deamidated)                                  | 1746.93047 | 56 | 84  |      | 6.07 | Expt2 |
| LLDNAFQR                         | 47  | 6680554                                                                                    | N-Term(iTRAQ4plex)                                                  | 1120.62627 | 56 | 54  |      | 3.54 | Expt2 |
| LPNFGFVFDDESEPVQR                | 3   | 31982757;124248575                                                                         | N-Term(iTRAQ4plex)                                                  | 2110.07700 | 56 | 44  |      | 3.79 | Expt2 |
| ISIAEGIER                        | 16  | 82950147;82950149;149264086                                                                | N-Term(iTRAQ4plex)                                                  | 1131.64983 | 56 | 54  |      | 3.50 | Expt2 |
| SEIIPMFNSLASDEQSVR               | 6   | 8394027                                                                                    | N-Term(iTRAQ4plex)                                                  | 2282.11186 | 56 | 102 |      | 4.44 | Expt2 |
| SDVLVEYOGEGR                     | 3   | 29789239                                                                                   | N-Term(iTRAQ4plex)                                                  | 1495.75261 | 56 | 60  |      | 3.67 | Expt2 |
| VVOCSDLGLK                       | 19  | 20137008                                                                                   | N-Term(iTRAQ4plex), C4(Methylthio), K10(iTRAQ4plex)                 | 1395.75676 | 56 | 78  |      | 4.53 | Expt2 |
| GLLNAIVIR                        | 18  | 8393866                                                                                    | N-Term(iTRAQ4plex)                                                  | 1112.72710 | 56 | 55  |      | 3.64 | Expt2 |
| YLNQDYETLR                       | 6   | 157951598                                                                                  | N-Term(iTRAQ4plex)                                                  | 1458.73674 | 56 | 42  |      | 3.76 | Expt2 |
| EVVEEAENGR                       | 9   | 149251474;7110705                                                                          | N-Term(iTRAQ4plex)                                                  | 1275.63262 | 56 | 54  |      | 3.61 | Expt2 |
| DIVQVFFR                         | 24  | 149269167;25141335;6753510;226052679;28416905;58037333;23346611;25470894;21630253;23943807 | N-Term(iTRAQ4plex)                                                  | 1264.72246 | 56 | 42  |      | 3.72 | Expt2 |
| SELDMLDIR                        | 5   | 31981302;158966670                                                                         | N-Term(iTRAQ4plex)                                                  | 1235.64458 | 56 | 39  |      |      | Expt2 |
| MALDDMSTLK                       | 3   | 6753320                                                                                    | N-Term(iTRAQ4plex), K11(iTRAQ4plex)                                 | 1525.82768 | 56 | 76  |      | 4.08 | Expt2 |
| WALSQSNPSALR                     | 21  | 225543319;94408011                                                                         | N-Term(iTRAQ4plex)                                                  | 1473.79241 | 55 | 55  |      | 4.01 | Expt2 |
| LGOSPVLGEQGNR                    | 3   | 113865981                                                                                  | N-Term(iTRAQ4plex)                                                  | 1498.81133 | 55 | 45  |      | 4.19 | Expt2 |
| DVAPMEEIIVPGNDTTSK               | 6   | 148747189                                                                                  | N-Term(iTRAQ4plex), K20(iTRAQ4plex)                                 | 2414.19724 | 55 | 47  |      | 5.00 | Expt2 |
| NODLAPNSAEQASISLVTK              | 6   | 13385872                                                                                   | N-Term(iTRAQ4plex), K20(iTRAQ4plex)                                 | 2387.31003 | 55 | 74  | 0.99 | 4.89 | Expt2 |
| FVFLVDAMNGK                      | 3   | 31982186                                                                                   | N-Term(iTRAQ4plex), M9(Oxidation), N10(Deamidated), K12(iTRAQ4plex) | 1632.85782 | 55 | 51  |      | 3.64 | Expt2 |
| DAALMVTNDGATILK                  | 6   | 126521835                                                                                  | N-Term(iTRAQ4plex), K15(iTRAQ4plex)                                 | 1821.00151 | 55 | 104 | 0.98 | 4.12 | Expt2 |
| GLPWSCSADEVQR                    | 9   | 10946928                                                                                   | N-Term(iTRAQ4plex), C6(Methylthio)                                  | 1637.75420 | 55 | 51  |      | 4.52 | Expt2 |
| YEELVOTAGR                       | 27  | 29789317;51092301;54607171;113195684                                                       | N-Term(iTRAQ4plex)                                                  | 1309.68933 | 55 | 72  |      | 3.92 | Expt2 |
| EQSQYSLVVR                       | 4   | 169234958;32129201;32129205                                                                | N-Term(iTRAQ4plex)                                                  | 1515.79387 | 55 | 42  |      | 4.36 | Expt2 |
| EAFQPEQPDFPPPPDLEQLR             | 10  | 31543942                                                                                   | N-Term(iTRAQ4plex)                                                  | 2591.29886 | 55 | 40  |      | 3.45 | Expt2 |
| IPSAVGYQPTLATDMGTMQER            | 9   | 31980648                                                                                   | N-Term(iTRAQ4plex), M15(Oxidation), M18(Oxidation)                  | 2442.18161 | 55 | 72  | 0.99 | 6.98 | Expt2 |
| LSILYPATTGR                      | 50  | 6671549                                                                                    | N-Term(iTRAQ4plex)                                                  | 1335.77373 | 55 | 48  |      | 3.71 | Expt2 |
| FNEEHIPDSPFVVPVSPSGDAR           | 4   | 125347376                                                                                  | N-Term(iTRAQ4plex)                                                  | 2611.29837 | 55 | 57  |      | 4.07 | Expt2 |
| GDYPLEAVR                        | 12  | 31981562                                                                                   | N-Term(iTRAQ4plex)                                                  | 1163.62065 | 55 | 48  |      |      | Expt2 |
| ALYETELADAR                      | 19  | 188219589                                                                                  | N-Term(iTRAQ4plex)                                                  | 1395.72490 | 55 | 59  |      | 4.08 | Expt2 |
| TDDYLDOPCLETINR                  | 6   | 33859560                                                                                   | N-Term(iTRAQ4plex), C9(Methylthio)                                  | 1985.90959 | 55 | 89  |      | 4.42 | Expt2 |
| ILEATTDNRR                       | 10  | 6754480                                                                                    | N-Term(iTRAQ4plex)                                                  | 1290.67925 | 55 | 53  |      |      | Expt2 |
| SSEMNVLIPIEGGDFNEFPVPEQFK        | 17  | 157951604                                                                                  | N-Term(iTRAQ4plex), K25(iTRAQ4plex)                                 | 3099.52182 | 55 | 50  |      | 6.01 | Expt2 |
| GEGPEVDVSLPK                     | 8   | 61743961                                                                                   | N-Term(iTRAQ4plex), K12(iTRAQ4plex)                                 | 1514.83415 | 55 | 51  |      | 3.92 | Expt2 |
| IGYNPDTVAFVPIGSGWNGDMLEPSANMPWFK | 3   | 126032329                                                                                  | N-Term(iTRAQ4plex), K32(iTRAQ4plex)                                 | 3855.88051 | 55 | 39  |      | 7.01 | Expt2 |
| ETVWTSTEPSR                      | 6   | 6679465                                                                                    | N-Term(iTRAQ4plex)                                                  | 1450.75591 | 55 | 69  |      |      | Expt2 |
| TPYTDNVIVTIR                     | 7   | 18250284                                                                                   | N-Term(iTRAQ4plex)                                                  | 1535.85869 | 55 | 50  |      | 3.94 | Expt2 |
| CPNPTECNMNFVSR                   | 3   | 20982845                                                                                   | N-Term(iTRAQ4plex), C1(Methylthio), C6(Methylthio)                  | 1934.75871 | 55 | 85  |      | 3.81 | Expt2 |
| MSATFIGNSTAIQELFK                | 9   | 33859488;22165384;21746161                                                                 | N-Term(iTRAQ4plex), K17(iTRAQ4plex)                                 | 2146.14995 | 55 | 79  | 1.03 | 5.31 | Expt2 |
| MASTFIGNSTAIQELFK                | 9   | 27754056                                                                                   | N-Term(iTRAQ4plex), K17(iTRAQ4plex)                                 | 2146.14995 | 55 | 79  | 1.03 | 5.31 | Expt2 |
| MAATFIGNSTAIQELFK                | 6   | 31981939                                                                                   | N-Term(iTRAQ4plex), M1(Oxidation), K17(iTRAQ4plex)                  | 2146.15335 | 55 | 74  | 1.03 |      | Expt2 |
| NICFTVVDVGGQDK                   | 11  | 6680722;149254976;6680720                                                                  | N-Term(iTRAQ4plex), C3(Methylthio), K14(iTRAQ4plex)                 | 1915.92485 | 55 | 88  |      | 4.70 | Expt2 |
| FLGSNDEEMSYDNNPYIR               | 8   | 164565411                                                                                  | N-Term(iTRAQ4plex)                                                  | 2308.03818 | 55 | 83  |      | 5.57 | Expt2 |
| ISEIEDAAFLAR                     | 6   | 23956396;256355015                                                                         | N-Term(iTRAQ4plex)                                                  | 1478.79778 | 55 | 60  |      | 4.50 | Expt2 |
| VEEAYDLAR                        | 9   | 6755204                                                                                    | N-Term(iTRAQ4plex)                                                  | 1209.62346 | 55 | 51  |      | 3.41 | Expt2 |
| LOVTASPOSCLGLR                   | 4   | 149255293;149255746;153945747;31982171                                                     | N-Term(iTRAQ4plex), C11(Methylthio)                                 | 1662.88213 | 55 | 43  |      | 4.02 | Expt2 |

|                            |    |                                                                                                                                                        |                                                                     |            |    |     |      |      |       |
|----------------------------|----|--------------------------------------------------------------------------------------------------------------------------------------------------------|---------------------------------------------------------------------|------------|----|-----|------|------|-------|
| PPYTIYVFPVR                | 6  | 10092608                                                                                                                                               | N-Term(iTRAQ4plex)                                                  | 1495.84343 | 55 | 50  |      |      | Expt2 |
| DOPFTILYR                  | 25 | 6753824                                                                                                                                                | N-Term(iTRAQ4plex)                                                  | 1296.70830 | 55 | 54  |      | 3.73 | Expt2 |
| LQLLEDLER                  | 3  | 114326497                                                                                                                                              | N-Term(iTRAQ4plex)                                                  | 1272.72795 | 55 | 53  |      | 3.49 | Expt2 |
| VEEEIVTLR                  | 5  | 31560247                                                                                                                                               | N-Term(iTRAQ4plex)                                                  | 1231.70122 | 55 | 44  |      | 3.96 | Expt2 |
| ILMVGLDAAGK                | 5  | 6680722:6680718:6680716:6671571:6680720                                                                                                                | N-Term(iTRAQ4plex), K11(iTRAQ4plex)                                 | 1375.82646 | 55 | 71  |      | 4.27 | Expt2 |
| AAAYDEYCSGVNR              | 9  | 112421039                                                                                                                                              | N-Term(iTRAQ4plex), C7(Methylthio)                                  | 1601.64922 | 55 | 42  |      | 4.03 | Expt2 |
| LAVNMVFPFR                 | 32 | 33859488:31981939:7106439:22165384:21746161:149253488:149253527:83030206:124430500:27754056:12963615                                                   | N-Term(iTRAQ4plex)                                                  | 1287.73747 | 55 | 42  |      | 3.94 | Expt2 |
| QAFDDAIAELDTLNEDSYK        | 5  | 6756037                                                                                                                                                | N-Term(iTRAQ4plex), K19(iTRAQ4plex)                                 | 2446.18943 | 55 | 54  |      | 6.09 | Expt2 |
| EDTEEYNLR                  | 3  | 82801284:94371439:149252089:82918363:82918359:149266543:149266545:82956957:51769129:149266569:82957137:94400765:149268214:149268216:37674277:157277969 | N-Term(iTRAQ4plex)                                                  | 1312.61394 | 55 | 46  |      | 3.67 | Expt2 |
| ELVNNLAEIYGR               | 3  | 215983062                                                                                                                                              | N-Term(iTRAQ4plex)                                                  | 1534.83269 | 55 | 51  |      | 4.14 | Expt2 |
| AAFVLPFTR                  | 4  | 6678131                                                                                                                                                | N-Term(iTRAQ4plex)                                                  | 1294.72783 | 55 |     |      | 3.65 | Expt2 |
| IMGIPEDQMGLLR              | 5  | 114326446                                                                                                                                              | N-Term(iTRAQ4plex)                                                  | 1745.90581 | 55 | 64  |      | 4.12 | Expt2 |
| LMTEQENGMLR                | 4  | 226423931                                                                                                                                              | N-Term(iTRAQ4plex), N7(Deamidated)                                  | 1449.71294 | 55 | 59  |      | 3.43 | Expt2 |
| ELEEEIER                   | 3  | 112421039                                                                                                                                              | N-Term(iTRAQ4plex)                                                  | 1190.60259 | 55 | 35  |      |      | Expt2 |
| LLQDFNNGR                  | 67 | 124339829:124339826                                                                                                                                    | N-Term(iTRAQ4plex), N7(Deamidated)                                  | 1254.66326 | 55 | 58  |      | 4.26 | Expt2 |
| TLMSPLGITR                 | 10 | 6678085:6678083:76881807:6678079                                                                                                                       | N-Term(iTRAQ4plex)                                                  | 1232.71465 | 55 | 37  |      | 3.41 | Expt2 |
| FSIEDALOSGR                | 18 | 112421039                                                                                                                                              | N-Term(iTRAQ4plex)                                                  | 1366.71221 | 55 | 65  |      | 4.40 | Expt2 |
| AOYEDIAQR                  | 16 | 54607171:113195684                                                                                                                                     | N-Term(iTRAQ4plex)                                                  | 1237.63037 | 55 | 80  |      |      | Expt2 |
| ESLQQLAEVTR                | 7  | 6679465                                                                                                                                                | N-Term(iTRAQ4plex)                                                  | 1417.77727 | 55 | 57  |      | 4.35 | Expt2 |
| AAFLSEQLQLSR               | 4  | 7305189                                                                                                                                                | N-Term(iTRAQ4plex)                                                  | 1603.89604 | 55 | 53  |      | 4.38 | Expt2 |
| SFGSAVLTR                  | 18 | 6680710                                                                                                                                                | N-Term(iTRAQ4plex)                                                  | 1081.61138 | 55 | 61  |      | 3.47 | Expt2 |
| CVCPVNTMCR                 | 9  | 149261823:164607147                                                                                                                                    | N-Term(iTRAQ4plex), C1(Methylthio), C3(Methylthio), C10(Methylthio) | 1494.56243 | 55 | 47  |      | 3.75 | Expt2 |
| ELOSQISDTSVLSMNSR          | 11 | 114145561                                                                                                                                              | N-Term(iTRAQ4plex)                                                  | 2253.12467 | 55 | 104 |      | 5.66 | Expt2 |
| DIVQFVPPYR                 | 3  | 25141330                                                                                                                                               | N-Term(iTRAQ4plex)                                                  | 1280.71245 | 55 | 34  |      | 3.59 | Expt2 |
| LVLEQVTSIASVADTAEK         | 11 | 29789199                                                                                                                                               | N-Term(iTRAQ4plex), K20(iTRAQ4plex)                                 | 2390.32706 | 55 | 87  |      | 5.92 | Expt2 |
| EAINLLEPMTNDPVNYVR         | 10 | 74315975                                                                                                                                               | N-Term(iTRAQ4plex)                                                  | 2232.14556 | 55 | 64  |      | 5.24 | Expt2 |
| YGYEIPVDMCLK               | 10 | 6755198                                                                                                                                                | N-Term(iTRAQ4plex), C11(Methylthio), K12(iTRAQ4plex)                | 1764.86601 | 55 | 85  |      | 3.90 | Expt2 |
| EGGSIPVTLTFOEATGK          | 6  | 31981273                                                                                                                                               | N-Term(iTRAQ4plex), K17(iTRAQ4plex)                                 | 2023.10263 | 55 | 71  | 1.49 | 4.79 | Expt2 |
| AVLENNLGAVALR              | 3  | 19527234                                                                                                                                               | N-Term(iTRAQ4plex)                                                  | 1483.87224 | 55 | 59  |      | 4.56 | Expt2 |
| DYPGFSPSVAEAIK             | 10 | 149254235:160707925                                                                                                                                    | N-Term(iTRAQ4plex)                                                  | 1767.86899 | 55 | 59  |      | 3.87 | Expt2 |
| VIGSGCNLDSAR               | 20 | 82998325:6678674:6754524:7305229:257743039                                                                                                             | N-Term(iTRAQ4plex), C6(Methylthio)                                  | 1381.66887 | 55 | 75  |      | 4.80 | Expt2 |
| YEVWDVAEAR                 | 12 | 149253258:33859482                                                                                                                                     | N-Term(iTRAQ4plex)                                                  | 1282.61882 | 55 | 46  |      | 3.58 | Expt2 |
| VLDNYLTSPLPEEVDTSAEDEGISQR | 17 | 15617203                                                                                                                                               | N-Term(iTRAQ4plex)                                                  | 3150.51560 | 54 | 88  |      | 6.45 | Expt2 |
| ELGSLPLPSASEQR             | 7  | 19527102                                                                                                                                               | N-Term(iTRAQ4plex)                                                  | 1740.96477 | 54 | 60  |      | 4.22 | Expt2 |
| GMVFGIPDGVLVLPOR           | 10 | 149253040:183979966                                                                                                                                    | N-Term(iTRAQ4plex), M2(Oxidation)                                   | 1987.08377 | 54 | 55  |      | 4.20 | Expt2 |
| MSSYAFVQTCR                | 8  | 149261847:82952271:149266674:149266934:83014391:6680229                                                                                                | N-Term(iTRAQ4plex), C11(Methylthio)                                 | 1629.73821 | 54 | 50  |      | 5.23 | Expt2 |
| AGFYFDGISR                 | 9  | 168693628                                                                                                                                              | N-Term(iTRAQ4plex)                                                  | 1276.64556 | 54 | 40  |      | 3.79 | Expt2 |
| DGALTQLNVAFSR              | 5  | 6679421                                                                                                                                                | N-Term(iTRAQ4plex)                                                  | 1535.83623 | 54 | 67  |      | 4.28 | Expt2 |
| YGLFPANYVELR               | 8  | 75677414                                                                                                                                               | N-Term(iTRAQ4plex)                                                  | 1585.85190 | 54 | 59  |      | 4.06 | Expt2 |
| FAQDVSQDDLIR               | 3  | 15809002                                                                                                                                               | N-Term(iTRAQ4plex)                                                  | 1550.79155 | 54 | 39  |      | 3.42 | Expt2 |
| DAGTIAGLNVLIR              | 32 | 31981690                                                                                                                                               | N-Term(iTRAQ4plex)                                                  | 1343.77966 | 54 | 79  |      | 4.86 | Expt2 |
| DFLLGAYQTEFPEGPTQLMK       | 3  | 31982393                                                                                                                                               | N-Term(iTRAQ4plex), Q18(Deamidated), K21(iTRAQ4plex)                | 2703.37534 | 54 | 35  |      | 4.40 | Expt2 |
| ESTGAQVOVAGDMLPNSTER       | 8  | 157042772:6754994:157041229:157057549:171906586                                                                                                        | N-Term(iTRAQ4plex), M13(Oxidation)                                  | 2250.07573 | 54 | 80  |      | 4.27 | Expt2 |
| NLATTVEIELEK               | 9  | 33859724                                                                                                                                               | N-Term(iTRAQ4plex), K13(iTRAQ4plex)                                 | 1748.99748 | 54 | 73  |      | 4.86 | Expt2 |
| MDATANDVPSPEYVK            | 9  | 112293264                                                                                                                                              | N-Term(iTRAQ4plex), K15(iTRAQ4plex)                                 | 1924.96001 | 54 | 64  |      | 4.11 | Expt2 |
| ADIVENQVMDTR               | 8  | 6754084                                                                                                                                                | N-Term(iTRAQ4plex), M9(Oxidation)                                   | 1550.76421 | 54 | 55  |      |      | Expt2 |
| GLGLDDALEPR                | 4  | 6755382                                                                                                                                                | N-Term(iTRAQ4plex)                                                  | 1299.70366 | 54 | 56  |      | 3.88 | Expt2 |
| FVEDVSR                    | 18 | 22203747                                                                                                                                               | N-Term(iTRAQ4plex)                                                  | 995.52892  | 54 | 43  |      |      | Expt2 |

|                        |     |                                                                                                                                                                                    |                                                      |            |    |    |      |       |       |
|------------------------|-----|------------------------------------------------------------------------------------------------------------------------------------------------------------------------------------|------------------------------------------------------|------------|----|----|------|-------|-------|
| SNEDQSMGNWQIR          | 11  | 9506843;162287370;161760667                                                                                                                                                        | N-Term(iTRAQ4plex)                                   | 1708.78301 | 54 | 72 | 4.33 | Expt2 |       |
| YEATISDMEDR            | 7   | 29336026                                                                                                                                                                           | N-Term(iTRAQ4plex)                                   | 1473.66557 | 54 | 58 | 4.51 | Expt2 |       |
| VELOELNDR              | 13  | 33563250;31982755                                                                                                                                                                  | N-Term(iTRAQ4plex)                                   | 1259.67449 | 54 | 53 | 3.41 | Expt2 |       |
| DPNASPGDAGEQAIR        | 3   | 31543942                                                                                                                                                                           | N-Term(iTRAQ4plex)                                   | 1641.79704 | 54 | 58 | 4.03 | Expt2 |       |
| SPTSPVTPPELPOPNAPEVEAR | 5   | 124487435                                                                                                                                                                          | N-Term(iTRAQ4plex)                                   | 2461.27292 | 54 | 49 | 4.00 | Expt2 |       |
| VNFTVDQIR              | 11  | 33859482                                                                                                                                                                           | N-Term(iTRAQ4plex)                                   | 1235.68791 | 54 | 40 |      | Expt2 |       |
| LLOSGNSDVVR            | 11  | 9790161                                                                                                                                                                            | N-Term(iTRAQ4plex)                                   | 1331.74211 | 54 | 67 | 3.63 | Expt2 |       |
| MGPAMPALGAGIER         | 17  | 21313308;158186704                                                                                                                                                                 | N-Term(iTRAQ4plex)                                   | 1571.81670 | 54 | 62 | 5.13 | Expt2 |       |
| YASQSIGIPSR            | 3   | 83029092;149255605                                                                                                                                                                 | N-Term(iTRAQ4plex), Q4(Deamidated)                   | 1410.73686 | 54 | 53 | 4.12 | Expt2 |       |
| LVSQDNFGFDLPAVEAATK    | 4   | 117938332;117938334                                                                                                                                                                | N-Term(iTRAQ4plex), K19(iTRAQ4plex)                  | 2310.22483 | 54 | 52 | 5.32 | Expt2 |       |
| TYEALETIQNSK           | 5   | 134053905                                                                                                                                                                          | N-Term(iTRAQ4plex), K14(iTRAQ4plex)                  | 1886.98185 | 54 | 45 | 4.09 | Expt2 |       |
| ALYLIATNGTPELQNEK      | 4   | 112181194;46659406                                                                                                                                                                 | N-Term(iTRAQ4plex), N8(Deamidated), K18(iTRAQ4plex)  | 2261.22873 | 54 | 42 | 1.04 | 3.46  | Expt2 |
| SLDNNYSTLNER           | 6   | 146219830;146219849                                                                                                                                                                | N-Term(iTRAQ4plex)                                   | 1569.76592 | 54 | 79 | 4.62 | Expt2 |       |
| IIMEVVK                | 3   | 111185907                                                                                                                                                                          | N-Term(iTRAQ4plex), K8(iTRAQ4plex)                   | 1248.75859 | 54 | 45 | 3.67 | Expt2 |       |
| VGAEDADGIDMAYR         | 3   | 34610207                                                                                                                                                                           | N-Term(iTRAQ4plex)                                   | 1626.75469 | 54 | 53 | 4.47 | Expt2 |       |
| SEDYAFPTYADR           | 7   | 6753498                                                                                                                                                                            | N-Term(iTRAQ4plex)                                   | 1578.72539 | 54 | 58 | 4.13 | Expt2 |       |
| VSNOMLTLFFMVQODIPVR    | 3   | 148277039                                                                                                                                                                          | N-Term(iTRAQ4plex), M5(Oxidation), M11(Oxidation)    | 2442.27042 | 54 | 66 | 6.45 | Expt2 |       |
| EVAELAEICGSLIOK        | 6   | 31560705                                                                                                                                                                           | N-Term(iTRAQ4plex), C8(Methylthio), K16(iTRAQ4plex)  | 1994.05643 | 54 | 62 | 5.63 | Expt2 |       |
| YEELQQTAGR             | 95  | 20911031                                                                                                                                                                           | N-Term(iTRAQ4plex)                                   | 1338.68157 | 54 | 60 | 3.93 | Expt2 |       |
| IAPQYDMSNFPQCEAK       | 3   | 110835723                                                                                                                                                                          | N-Term(iTRAQ4plex), C14(Methylthio), K17(iTRAQ4plex) | 2339.07932 | 54 | 57 | 4.75 | Expt2 |       |
| IEQELAAIK              | 4   | 111074529                                                                                                                                                                          | N-Term(iTRAQ4plex), K9(iTRAQ4plex)                   | 1302.78850 | 54 | 67 | 4.18 | Expt2 |       |
| EELVVAVEDVR            | 5   | 6753294                                                                                                                                                                            | N-Term(iTRAQ4plex)                                   | 1401.77117 | 54 | 46 | 3.79 | Expt2 |       |
| DLGVFIPAPMAQGR         | 3   | 110630015;34486094                                                                                                                                                                 | N-Term(iTRAQ4plex)                                   | 1615.87834 | 54 | 35 | 3.71 | Expt2 |       |
| FGYVDFESAEDLEK         | 3   | 84875537                                                                                                                                                                           | N-Term(iTRAQ4plex), K14(iTRAQ4plex)                  | 1936.94455 | 54 | 62 | 5.10 | Expt2 |       |
| ETIEVMEDR              | 32  | 82801284;94371439;149252089;82918363;82918359;82954743;149266199;82954739;149266543;149266545;82956957;51769129;149266569;82957137;94400765;149268214;149268216;37674277;157277969 | N-Term(iTRAQ4plex)                                   | 1378.70061 | 54 | 60 | 4.22 | Expt2 |       |
| LWDLTTGTTR             | 12  | 6680047                                                                                                                                                                            | N-Term(iTRAQ4plex)                                   | 1408.75664 | 54 | 55 | 3.79 | Expt2 |       |
| VNSVNPVTTLDMGK         | 8   | 6671688                                                                                                                                                                            | N-Term(iTRAQ4plex), K15(iTRAQ4plex)                  | 1862.03867 | 54 | 48 | 4.38 | Expt2 |       |
| EAEVLLQQR              | 18  | 112421039                                                                                                                                                                          | N-Term(iTRAQ4plex)                                   | 1342.78049 | 54 | 61 | 4.05 | Expt2 |       |
| VEADVVPPOVQGDLEK       | 5   | 149263538                                                                                                                                                                          | N-Term(iTRAQ4plex), K15(iTRAQ4plex)                  | 1882.05498 | 54 | 62 | 3.84 | Expt2 |       |
| QLLEGELEPLR            | 12  | 112421039                                                                                                                                                                          | N-Term(iTRAQ4plex)                                   | 1440.82097 | 54 | 61 | 4.08 | Expt2 |       |
| AQALAIETEALER          | 3   | 239052674                                                                                                                                                                          | N-Term(iTRAQ4plex)                                   | 1687.90337 | 54 | 57 | 4.02 | Expt2 |       |
| ILLTPMAAGSR            | 32  | 111074529                                                                                                                                                                          | N-Term(iTRAQ4plex)                                   | 1273.74333 | 54 | 49 | 3.54 | Expt2 |       |
| IIITGDEDVDQDOALALAIK   | 3   | 7305029;54873604                                                                                                                                                                   | N-Term(iTRAQ4plex), K20(iTRAQ4plex)                  | 2429.34281 | 54 | 75 | 4.35 | Expt2 |       |
| MLLFEVTR               | 9   | 116089273                                                                                                                                                                          | N-Term(iTRAQ4plex)                                   | 1253.70696 | 54 | 46 |      | Expt2 |       |
| GPOITGPSLEGDLGK        | 7   | 61743961                                                                                                                                                                           | N-Term(iTRAQ4plex), K16(iTRAQ4plex)                  | 1870.05722 | 54 | 55 | 4.19 | Expt2 |       |
| TALLELWELR             | 10  | 115496850                                                                                                                                                                          | N-Term(iTRAQ4plex)                                   | 1387.80962 | 54 | 53 | 4.34 | Expt2 |       |
| LDOLIYIPLDEK           | 11  | 225543319;94408011                                                                                                                                                                 | N-Term(iTRAQ4plex), K13(iTRAQ4plex)                  | 1845.07121 | 54 | 55 | 3.68 | Expt2 |       |
| CTVNDQNSDGYCQTGMTSR    | 9   | 82950147;82950149;149264086                                                                                                                                                        | N-Term(iTRAQ4plex), C1(Methylthio), C12(Methylthio)  | 2315.88970 | 54 | 85 | 4.70 | Expt2 |       |
| GPQVDPVPSVLSMPK        | 8   | 61743961                                                                                                                                                                           | N-Term(iTRAQ4plex), K15(iTRAQ4plex)                  | 1799.98479 | 54 | 69 | 4.58 | Expt2 |       |
| VLVVVTDGR              | 73  | 111074529                                                                                                                                                                          | N-Term(iTRAQ4plex)                                   | 1101.67668 | 54 | 66 |      | Expt2 |       |
| AGLOFPVGR              | 127 | 30061399;94394730;30089710;30061353;7949045;94378041;28316756;29244126;119433657;30061327;30061379;30061371;71066331;256773209                                                     | N-Term(iTRAQ4plex)                                   | 1088.63469 | 54 | 49 | 3.92 | Expt2 |       |
| LFAVAPNR               | 63  | 22203747                                                                                                                                                                           | N-Term(iTRAQ4plex)                                   | 1031.61186 | 54 | 47 | 3.40 | Expt2 |       |
| VQQTVDLFGFR            | 6   | 162461907                                                                                                                                                                          | N-Term(iTRAQ4plex)                                   | 1434.78386 | 54 | 58 | 4.38 | Expt2 |       |
| TAMNVNEIFMAIAK         | 3   | 11386024                                                                                                                                                                           | N-Term(iTRAQ4plex), M3(Oxidation), K14(iTRAQ4plex)   | 1856.99283 | 54 | 50 | 4.09 | Expt2 |       |
| TSMNVNEIFMAIAK         | 2   | 13385374                                                                                                                                                                           | N-Term(iTRAQ4plex), K14(iTRAQ4plex)                  | 1856.99283 | 54 | 50 |      | Expt2 |       |
| VINEPTAAALAYGLDK       | 5   | 162461907                                                                                                                                                                          | N-Term(iTRAQ4plex), K16(iTRAQ4plex)                  | 1934.09031 | 54 | 49 | 4.84 | Expt2 |       |
| NLFEDQNTLTSICEK        | 4   | 12963737                                                                                                                                                                           | N-Term(iTRAQ4plex), C13(Methylthio), K15(iTRAQ4plex) | 2089.02408 | 54 | 60 | 3.55 | Expt2 |       |
| VLFDPLFPATDDSLYYK      | 4   | 6680846                                                                                                                                                                            | N-Term(iTRAQ4plex), K18(iTRAQ4plex)                  | 2421.25284 | 54 | 62 | 4.52 | Expt2 |       |
| DFQNFQGNVVVELR         | 22  | 7305075                                                                                                                                                                            | N-Term(iTRAQ4plex)                                   | 1728.89006 | 54 | 78 | 4.34 | Expt2 |       |

|                            |     |                                                                        |                                                                     |            |    |     |      |      |       |
|----------------------------|-----|------------------------------------------------------------------------|---------------------------------------------------------------------|------------|----|-----|------|------|-------|
| EYFGFGEVESIELPMDNK         | 6   | 116256518;116256514;116256516;116256512                                | N-Term(iTRAQ4plex), M16(Oxidation), K19(iTRAQ4plex)                 | 2465.18900 | 54 | 56  |      | 6.30 | Expt2 |
| ASVVTLPVVLNFR              | 7   | 134288917                                                              | N-Term(iTRAQ4plex)                                                  | 1723.98943 | 53 | 54  |      | 3.83 | Expt2 |
| QOQFENLDQQLR               | 3   | 13385878                                                               | N-Term(iTRAQ4plex)                                                  | 1690.86382 | 53 | 58  |      | 4.31 | Expt2 |
| AVTPLYPANQADIIFDITEGNLR    | 3   | 168693628                                                              | N-Term(iTRAQ4plex)                                                  | 2675.41825 | 53 | 35  |      | 5.06 | Expt2 |
| LDEGWVPLETMK               | 6   | 6678143                                                                | N-Term(iTRAQ4plex), K13(iTRAQ4plex)                                 | 1818.99515 | 53 | 43  |      | 4.04 | Expt2 |
| MSVEADINGLR                | 10  | 154090941;7106335;21489935                                             | N-Term(iTRAQ4plex)                                                  | 1348.70171 | 53 | 54  |      | 4.20 | Expt2 |
| LVOLLVK                    | 6   | 28395018                                                               | N-Term(iTRAQ4plex), K7(iTRAQ4plex)                                  | 1100.75627 | 53 | 56  |      |      | Expt2 |
| AGAGSATLSMAYAGAR           | 3   | 31982186                                                               | N-Term(iTRAQ4plex), M10(Oxidation)                                  | 1614.80071 | 53 | 63  |      | 3.49 | Expt2 |
| MISSYVGENAEFER             | 4   | 18266680                                                               | N-Term(iTRAQ4plex)                                                  | 1775.83891 | 53 | 60  |      | 5.19 | Expt2 |
| AGVIFPVGR                  | 9   | 46250738;41152517;283945572;283945575;283945579                        | N-Term(iTRAQ4plex)                                                  | 1059.64018 | 53 | 44  |      | 3.59 | Expt2 |
| LQNDPQLEAEYR               | 10  | 112421039                                                              | N-Term(iTRAQ4plex)                                                  | 1619.81767 | 53 | 63  |      | 4.57 | Expt2 |
| VMODFFIDLRL                | 3   | 126518317                                                              | N-Term(iTRAQ4plex)                                                  | 1427.74858 | 53 | 44  |      | 3.67 | Expt2 |
| DVDLEFLAK                  | 4   | 225543319;94408011                                                     | N-Term(iTRAQ4plex), K9(iTRAQ4plex)                                  | 1337.75920 | 53 | 64  |      | 3.89 | Expt2 |
| DDDLNLR                    | 18  | 22203747                                                               | N-Term(iTRAQ4plex)                                                  | 1004.51396 | 53 | 39  |      |      | Expt2 |
| DTLYEAVR                   | 6   | 149233917                                                              | N-Term(iTRAQ4plex)                                                  | 1110.59123 | 53 | 42  |      |      | Expt2 |
| GESLFMGR                   | 3   | 31560359                                                               | N-Term(iTRAQ4plex)                                                  | 1040.53154 | 53 | 42  |      | 3.44 | Expt2 |
| INISEGNCPER                | 18  | 157042772;6754994;157041229;157052549;171906586                        | N-Term(iTRAQ4plex), C8(Methylthio)                                  | 1421.66240 | 53 | 49  |      | 4.52 | Expt2 |
| TFTDCFNCLPIAAIIVDEK        | 3   | 161484668;31980772;94392631;13994195                                   | N-Term(iTRAQ4plex), C5(Methylthio), C8(Methylthio), K18(iTRAQ4plex) | 2380.13193 | 53 | 47  |      | 4.42 | Expt2 |
| INMNGINSSGMVDAR            | 3   | 31543918                                                               | N-Term(iTRAQ4plex), N4(Deamidated)                                  | 1837.86662 | 53 | 86  |      | 4.18 | Expt2 |
| ECLPLIFLR                  | 11  | 6677805;51708365                                                       | N-Term(iTRAQ4plex), C2(Methylthio)                                  | 1406.80387 | 53 | 57  |      | 3.65 | Expt2 |
| TPETAFLGEDLLQVEQR          | 6   | 85838509                                                               | N-Term(iTRAQ4plex)                                                  | 2219.13443 | 53 | 82  |      | 5.35 | Expt2 |
| EOGYIFGDYIER               | 3   | 159110717                                                              | N-Term(iTRAQ4plex)                                                  | 1633.79888 | 53 | 49  |      | 4.14 | Expt2 |
| LIDFLECGK                  | 7   | 83816893                                                               | N-Term(iTRAQ4plex), C7(Methylthio), K9(iTRAQ4plex)                  | 1371.72515 | 53 | 54  | 0.97 | 3.53 | Expt2 |
| MFFDAELSQMOTHVSDTSVLSMDNRR | 11  | 20911031                                                               | N-Term(iTRAQ4plex), M1(Oxidation), M23(Oxidation)                   | 3278.49428 | 53 | 45  |      | 5.33 | Expt2 |
| ISENMIPVVAEK               | 4   | 117553604                                                              | N-Term(iTRAQ4plex), K12(iTRAQ4plex)                                 | 1617.91374 | 53 | 93  |      | 4.32 | Expt2 |
| FADDITYTESYISTIGVDFK       | 6   | 6679587;21313162                                                       | N-Term(iTRAQ4plex), K19(iTRAQ4plex)                                 | 2460.21531 | 53 | 64  |      | 4.77 | Expt2 |
| DLELLYPFK                  | 11  | 6753762                                                                | N-Term(iTRAQ4plex), K9(iTRAQ4plex)                                  | 1425.82927 | 53 | 58  | 1.35 | 3.71 | Expt2 |
| LYGPSLPGNMQYCVR            | 6   | 33469047                                                               | N-Term(iTRAQ4plex), C13(Methylthio)                                 | 1887.90642 | 53 | 70  |      | 4.52 | Expt2 |
| GGPTPQEAIOR                | 3   | 28077049                                                               | N-Term(iTRAQ4plex)                                                  | 1297.70220 | 53 | 44  |      | 3.79 | Expt2 |
| MMEVAAADVOR                | 4   | 31981273                                                               | N-Term(iTRAQ4plex)                                                  | 1364.68132 | 53 | 53  |      | 3.90 | Expt2 |
| DYGVLLSAGIALR              | 6   | 6680690                                                                | N-Term(iTRAQ4plex)                                                  | 1620.91092 | 53 | 72  |      | 3.94 | Expt2 |
| DVLSVAFSSDNR               | 33  | 6680047                                                                | N-Term(iTRAQ4plex)                                                  | 1453.74516 | 53 | 71  |      | 4.47 | Expt2 |
| DTADGILTDVILK              | 21  | 8394362                                                                | N-Term(iTRAQ4plex), K13(iTRAQ4plex)                                 | 1661.95964 | 53 | 82  | 0.99 | 5.21 | Expt2 |
| VLDLTLRL                   | 43  | 154090941;7106335;6680606;226823220;21489935                           | N-Term(iTRAQ4plex)                                                  | 1173.69458 | 53 | 57  |      |      | Expt2 |
| GDVNDNFQGVQLQNVRR          | 3   | 149249577;47059073                                                     | N-Term(iTRAQ4plex)                                                  | 1818.92473 | 53 | 107 |      | 4.72 | Expt2 |
| QGFGELLOAVPLADSFRR         | 3   | 6753086                                                                | N-Term(iTRAQ4plex)                                                  | 1992.06827 | 53 | 36  |      | 4.97 | Expt2 |
| LLIIGDSGVGK                | 18  | 6679587;37718983;7710086;27734154;38372905;21313162;21311975;165377074 | N-Term(iTRAQ4plex), K11(iTRAQ4plex)                                 | 1359.85210 | 53 | 54  |      | 3.61 | Expt2 |
| YFVEAGAMAVR                | 8   | 110625624                                                              | N-Term(iTRAQ4plex)                                                  | 1357.70220 | 53 | 53  |      | 4.01 | Expt2 |
| SLOPEIQPFPOTASR            | 3   | 226958456                                                              | N-Term(iTRAQ4plex)                                                  | 1842.98479 | 53 | 73  |      | 4.02 | Expt2 |
| AEFGPPGPGGSR               | 5   | 227499103;227499234                                                    | N-Term(iTRAQ4plex)                                                  | 1369.69902 | 53 | 61  |      | 3.98 | Expt2 |
| LMVALAK                    | 3   | 149260099;6996913                                                      | N-Term(iTRAQ4plex), K7(iTRAQ4plex)                                  | 1033.67937 | 53 | 55  |      |      | Expt2 |
| DMSIQELAVLVSGQK            | 3   | 112421039                                                              | N-Term(iTRAQ4plex), M2(Oxidation), K15(iTRAQ4plex)                  | 1922.05698 | 53 | 40  |      | 4.40 | Expt2 |
| YENELALR                   | 62  | 118130981                                                              | N-Term(iTRAQ4plex)                                                  | 1151.61987 | 53 | 58  |      | 3.42 | Expt2 |
| QEVNIPAGETSTR              | 4   | 115647999                                                              | N-Term(iTRAQ4plex)                                                  | 1545.79839 | 53 | 45  |      | 3.77 | Expt2 |
| SGSLSTOFADMISLK            | 3   | 82950147;82950149;149264086                                            | N-Term(iTRAQ4plex), M12(Oxidation), K16(iTRAQ4plex)                 | 2002.07755 | 53 | 59  |      | 4.72 | Expt2 |
| TDLEMQIESLNEELAYLK         | 6   | 6754480                                                                | N-Term(iTRAQ4plex), M5(Oxidation), K18(iTRAQ4plex)                  | 2443.25713 | 53 | 91  |      | 5.39 | Expt2 |
| TMONTSDLDTAR               | 9   | 28395018                                                               | N-Term(iTRAQ4plex)                                                  | 1496.71697 | 53 | 71  |      | 4.44 | Expt2 |
| EITALAPSTMK                | 27  | 6671509;6752954;6671507;157823889;14192922;33563240                    | N-Term(iTRAQ4plex), M10(Oxidation), K11(iTRAQ4plex)                 | 1465.81987 | 53 | 59  |      | 3.83 | Expt2 |
| QVELALWDTAGQEDYDR          | 4   | 160415213;6680726;31542143;240120058                                   | N-Term(iTRAQ4plex)                                                  | 2153.02544 | 52 | 89  |      | 5.28 | Expt2 |
| GGLPQAFYIYLK               | 4   | 166235890                                                              | N-Term(iTRAQ4plex), K15(iTRAQ4plex)                                 | 1988.07859 | 52 | 47  |      | 4.09 | Expt2 |
| VLDLTLRL                   | 107 | 118130981                                                              | N-Term(iTRAQ4plex)                                                  | 1203.70679 | 52 | 56  | 0.98 | 4.18 | Expt2 |

|                          |    |                                                                     |                                                     |            |    |     |      |       |
|--------------------------|----|---------------------------------------------------------------------|-----------------------------------------------------|------------|----|-----|------|-------|
| EAFLDFDR                 | 16 | 33620739;149252094;149252164;94383790;149265610                     | N-Term(iTRAQ4plex)                                  | 1169.60820 | 52 | 54  | 3.47 | Expt2 |
| SVEVAAGATAR              | 4  | 6754066                                                             | N-Term(iTRAQ4plex)                                  | 1175.65288 | 52 | 54  |      | Expt2 |
| YLTVAAVFR                | 18 | 31981939;7106439;22165384;149253488;149253527                       | N-Term(iTRAQ4plex)                                  | 1183.69817 | 52 | 53  |      | Expt2 |
| SLSLILYSR                | 4  | 149254182;51172612                                                  | N-Term(iTRAQ4plex)                                  | 1195.72161 | 52 | 53  | 3.64 | Expt2 |
| AAALEFLNR                | 10 | 14389431                                                            | N-Term(iTRAQ4plex)                                  | 1148.65959 | 52 | 51  | 3.67 | Expt2 |
| GISPPVILNR               | 9  | 87299637;116063570                                                  | N-Term(iTRAQ4plex)                                  | 1209.74675 | 52 | 46  |      | Expt2 |
| MAQALDLR                 | 3  | 113195686                                                           | N-Term(iTRAQ4plex)                                  | 1190.63152 | 52 | 42  | 3.58 | Expt2 |
| DVYTGDLAR                | 4  | 7242197                                                             | N-Term(iTRAQ4plex)                                  | 1153.60002 | 52 | 42  |      | Expt2 |
| LLIVSTPTAR               | 15 | 8394362                                                             | N-Term(iTRAQ4plex)                                  | 1214.75652 | 52 | 41  |      | Expt2 |
| VLELLPIR                 | 6  | 158517895                                                           | N-Term(iTRAQ4plex)                                  | 1209.80596 | 52 | 39  |      | Expt2 |
| SPIAEAVFR                | 2  | 82932679;159032062                                                  | N-Term(iTRAQ4plex)                                  | 1133.64556 | 52 | 38  |      | Expt2 |
| YLPFVPSR                 | 12 | 10946680                                                            | N-Term(iTRAQ4plex)                                  | 1122.64397 | 52 | 37  |      | Expt2 |
| LEDFLDESQESQIFSGSDISQLEK | 3  | 111154082;111154076                                                 | N-Term(iTRAQ4plex), K24(iTRAQ4plex)                 | 3032.48417 | 52 | 69  | 5.27 | Expt2 |
| AEELGLPLIGVLR            | 3  | 18700004;22122797                                                   | N-Term(iTRAQ4plex)                                  | 1523.93047 | 52 | 54  | 4.03 | Expt2 |
| DVQELYAAGENR             | 11 | 149265356;149265358;160707921                                       | N-Term(iTRAQ4plex)                                  | 1508.75017 | 52 | 74  | 4.68 | Expt2 |
| YFPVFEK                  | 18 | 160298217                                                           | N-Term(iTRAQ4plex), K7(iTRAQ4plex)                  | 1217.68620 | 52 | 55  |      | Expt2 |
| GAWSNVLR                 | 6  | 22094075;148747424                                                  | N-Term(iTRAQ4plex)                                  | 1046.58660 | 52 | 41  |      | Expt2 |
| AWTVLEQLR                | 4  | 7305061                                                             | N-Term(iTRAQ4plex)                                  | 1146.63957 | 52 | 38  |      | Expt2 |
| LSPVAEEFR                | 6  | 160333304                                                           | N-Term(iTRAQ4plex)                                  | 1191.64983 | 52 | 55  |      | Expt2 |
| YFYFYNTGLONOR            | 5  | 6755152                                                             | N-Term(iTRAQ4plex)                                  | 1857.90373 | 52 | 40  | 4.10 | Expt2 |
| ESAYLYAR                 | 14 | 6679166                                                             | N-Term(iTRAQ4plex)                                  | 1116.58061 | 52 | 51  |      | Expt2 |
| DSYDSYATHNE              | 3  | 6680946                                                             | N-Term(iTRAQ4plex)                                  | 1445.59746 | 52 | 36  | 4.00 | Expt2 |
| YSDIEPSTEGEVIFR          | 3  | 114326497                                                           | N-Term(iTRAQ4plex)                                  | 1885.93320 | 52 | 66  |      | Expt2 |
| TLVLLMGK                 | 12 | 6755040                                                             | N-Term(iTRAQ4plex), K8(iTRAQ4plex)                  | 1162.75615 | 52 | 55  | 3.74 | Expt2 |
| NFVINNVNR                | 76 | 22203747                                                            | N-Term(iTRAQ4plex)                                  | 1218.70654 | 52 | 57  | 3.94 | Expt2 |
| NLANTVTEELEK             | 5  | 114145493;29788787                                                  | N-Term(iTRAQ4plex), K13(iTRAQ4plex)                 | 1761.98691 | 52 | 53  | 4.03 | Expt2 |
| AQWPAWQPWNVR             | 3  | 21704174                                                            | N-Term(iTRAQ4plex)                                  | 1595.85869 | 52 |     | 3.54 | Expt2 |
| GPILMELOTYR              | 6  | 6679261                                                             | N-Term(iTRAQ4plex)                                  | 1464.80107 | 52 | 52  | 3.53 | Expt2 |
| NLLDELASR                | 16 | 112421039                                                           | N-Term(iTRAQ4plex)                                  | 1174.65544 | 52 | 44  | 3.47 | Expt2 |
| FDLMYAK                  | 11 | 6755901;34740335;6678465;6678467;51765047;8394493;224809300;6678469 | N-Term(iTRAQ4plex), K7(iTRAQ4plex)                  | 1175.63249 | 52 | 55  |      | Expt2 |
| NVPPGLDEYNPFSDSR         | 7  | 58037395                                                            | N-Term(iTRAQ4plex)                                  | 1950.93169 | 52 | 68  | 3.76 | Expt2 |
| EEHIPVAPEYDK             | 7  | 6680618                                                             | N-Term(iTRAQ4plex), K12(iTRAQ4plex)                 | 1690.91496 | 52 | 52  |      | Expt2 |
| VFTNLNIR                 | 10 | 148277039                                                           | N-Term(iTRAQ4plex)                                  | 1120.66301 | 52 | 44  |      | Expt2 |
| NQLDQEVFLSTIAQLK         | 3  | 55741463                                                            | N-Term(iTRAQ4plex), K18(iTRAQ4plex)                 | 2351.27250 | 52 | 71  | 4.64 | Expt2 |
| DFDGIYYGDNR              | 5  | 161484644                                                           | N-Term(iTRAQ4plex)                                  | 1478.66777 | 52 | 51  | 4.18 | Expt2 |
| SSNTYTLTDVR              | 5  | 31791059                                                            | N-Term(iTRAQ4plex)                                  | 1400.71733 | 52 | 71  | 4.70 | Expt2 |
| IAQWONFR                 | 5  | 148277039                                                           | N-Term(iTRAQ4plex)                                  | 1206.65044 | 52 | 42  |      | Expt2 |
| OLANSLSGVQNOLOSFNSYR     | 3  | 55926127                                                            | N-Term(iTRAQ4plex)                                  | 2398.22934 | 52 | 66  | 5.08 | Expt2 |
| VPAGLPDLK                | 10 | 20137008                                                            | N-Term(iTRAQ4plex), K9(iTRAQ4plex)                  | 1197.75676 | 52 | 57  |      | Expt2 |
| COSLTEDLEFR              | 6  | 188219589                                                           | N-Term(iTRAQ4plex), C1(Methylthio)                  | 1530.70391 | 52 | 54  | 4.40 | Expt2 |
| FEDESFR                  | 13 | 33469047                                                            | N-Term(iTRAQ4plex)                                  | 1188.52922 | 52 | 35  | 3.41 | Expt2 |
| LLVLYGEDDELLR            | 3  | 227908790                                                           | N-Term(iTRAQ4plex)                                  | 1778.96782 | 52 | 68  | 3.80 | Expt2 |
| LCTSATESEVTR             | 4  | 46593021                                                            | N-Term(iTRAQ4plex), C2(Methylthio)                  | 1486.70012 | 52 | 55  | 4.22 | Expt2 |
| GISOEQMQEFR              | 5  | 11230802                                                            | N-Term(iTRAQ4plex), M7(Oxidation)                   | 1512.72820 | 52 | 53  | 3.54 | Expt2 |
| MSSILAGGSCR              | 6  | 6680604;21489935                                                    | N-Term(iTRAQ4plex), C10(Methylthio)                 | 1271.60234 | 52 | 47  | 3.96 | Expt2 |
| TPPLALVFR                | 5  | 6753960                                                             | N-Term(iTRAQ4plex)                                  | 1157.71782 | 52 | 45  |      | Expt2 |
| NNLAGAEELFAR             | 11 | 51491845                                                            | N-Term(iTRAQ4plex), N1(Deamidated)                  | 1449.74614 | 52 | 70  | 4.24 | Expt2 |
| IPVGPETLGR               | 10 | 31980648                                                            | N-Term(iTRAQ4plex)                                  | 1182.69707 | 52 | 51  |      | Expt2 |
| ASLGSLEGEVEAEASSPK       | 6  | 61743961                                                            | N-Term(iTRAQ4plex), K18(iTRAQ4plex)                 | 2049.06182 | 52 | 102 | 4.10 | Expt2 |
| GEISSQDAMMEEIFR          | 11 | 30519997                                                            | N-Term(iTRAQ4plex)                                  | 1987.92314 | 52 | 97  | 4.86 | Expt2 |
| COLEINFNTLQTK            | 4  | 61097906;11230802;7304855;157951643                                 | N-Term(iTRAQ4plex), C1(Methylthio), K13(iTRAQ4plex) | 1885.97513 | 52 | 48  | 4.35 | Expt2 |
| AAVESLGFILFR             | 3  | 74315975                                                            | N-Term(iTRAQ4plex)                                  | 1466.85344 | 52 | 60  | 4.42 | Expt2 |
| VAWGLVPGASGFR            | 3  | 115647999                                                           | N-Term(iTRAQ4plex)                                  | 1460.81194 | 52 | 45  | 3.78 | Expt2 |

|                              |    |                                                                                        |                                     |            |    |     |      |       |
|------------------------------|----|----------------------------------------------------------------------------------------|-------------------------------------|------------|----|-----|------|-------|
| IALVITDGR                    | 88 | 6753484                                                                                | N-Term(iTRAQ4plex)                  | 1101.67632 | 52 | 63  |      | Expt2 |
| GNEMSEVLR                    | 3  | 31560731                                                                               | N-Term(iTRAQ4plex)                  | 1178.59404 | 52 | 32  | 3.72 | Expt2 |
| VFSDEVQQAQLSTIR              | 5  | 51093840                                                                               | N-Term(iTRAQ4plex)                  | 1993.04753 | 52 | 55  | 4.43 | Expt2 |
| ILGIPDDPDLVR                 | 3  | 22122469                                                                               | N-Term(iTRAQ4plex)                  | 1523.85478 | 52 | 52  | 4.01 | Expt2 |
| GSVAPSQMDEVDFSR              | 3  | 149255330                                                                              | N-Term(iTRAQ4plex)                  | 1867.90141 | 52 | 91  | 4.44 | Expt2 |
| LEALELK                      | 3  | 6754090                                                                                | N-Term(iTRAQ4plex), K7(iTRAQ4plex)  | 1103.70000 | 52 | 56  |      | Expt2 |
| VIFLENYR                     | 7  | 6755256;24418919                                                                       | N-Term(iTRAQ4plex)                  | 1197.67534 | 52 | 36  |      | Expt2 |
| QTNPSAMEVEEDDPVPEIR          | 12 | 225543319;94408011                                                                     | N-Term(iTRAQ4plex)                  | 2300.08330 | 52 | 108 | 5.59 | Expt2 |
| YEMGNPENLLVVDSR              | 5  | 169234958;32129201                                                                     | N-Term(iTRAQ4plex), M3(Oxidation)   | 2009.97405 | 52 | 107 | 4.07 | Expt2 |
| AASISAVSLEVAOPGPSSGPR        | 9  | 183979966                                                                              | N-Term(iTRAQ4plex)                  | 2125.13926 | 52 | 54  | 5.03 | Expt2 |
| FDDAVVQSDMK                  | 4  | 31981690                                                                               | N-Term(iTRAQ4plex), K11(iTRAQ4plex) | 1542.77422 | 52 | 54  | 0.99 | Expt2 |
| LEOEIATYR                    | 31 | 6680604;6754480;21592285;15409094<br>1:7106335;27370460;6680606;2268232<br>20:21489935 | N-Term(iTRAQ4plex)                  | 1266.68413 | 52 | 47  | 3.84 | Expt2 |
| EGLEYPLR                     | 2  | 114155129                                                                              | N-Term(iTRAQ4plex)                  | 1233.69512 | 52 |     | 3.53 | Expt2 |
| INEAFDLLR                    | 23 | 6724311                                                                                | N-Term(iTRAQ4plex)                  | 1234.69182 | 52 | 43  | 3.72 | Expt2 |
| DPSPGOPSNFIVPFQEAQWRPDGQPATR | 3  | 183979966                                                                              | N-Term(iTRAQ4plex)                  | 3394.67173 | 52 |     | 3.76 | Expt2 |
| LGLIPEEFFQFLYPK              | 3  | 78214312                                                                               | N-Term(iTRAQ4plex), K15(iTRAQ4plex) | 2129.19449 | 52 | 55  | 4.32 | Expt2 |
| GVPTLTITVDTR                 | 6  | 27229085                                                                               | N-Term(iTRAQ4plex)                  | 1450.80303 | 52 | 61  | 4.34 | Expt2 |
| SAVDNCQDSWR                  | 4  | 124486895                                                                              | N-Term(iTRAQ4plex), C6(Methylthio)  | 1470.62517 | 52 | 52  | 4.18 | Expt2 |
| GDYSVLVPLR                   | 5  | 124494256                                                                              | N-Term(iTRAQ4plex)                  | 1319.74272 | 52 | 43  | 3.87 | Expt2 |
| WLLLTGISAQNR                 | 20 | 51491845                                                                               | N-Term(iTRAQ4plex)                  | 1643.93863 | 52 | 69  | 4.48 | Expt2 |
| GDLPFVTR                     | 2  | 114326446                                                                              | N-Term(iTRAQ4plex)                  | 1147.65911 | 52 | 39  |      | Expt2 |
| LLPPTQNNR                    | 31 | 6753484                                                                                | N-Term(iTRAQ4plex)                  | 1196.68718 | 52 | 47  |      | Expt2 |
| INVLPLGSGAIAGNPLGVDR         | 7  | 19526986                                                                               | N-Term(iTRAQ4plex)                  | 2077.19071 | 52 | 75  | 4.57 | Expt2 |
| SSLQTMESDVYEVYR              | 3  | 62526118                                                                               | N-Term(iTRAQ4plex), M6(Oxidation)   | 1904.90300 | 52 | 85  | 3.56 | Expt2 |
| LTWSQAPGR                    | 6  | 111074529                                                                              | N-Term(iTRAQ4plex)                  | 1159.63432 | 52 | 43  |      | Expt2 |
| TPSALAILENANVLAR             | 14 | 60687506                                                                               | N-Term(iTRAQ4plex)                  | 1797.04289 | 51 | 87  | 5.02 | Expt2 |
| DMETIGFAYOVPR                | 13 | 160333229                                                                              | N-Term(iTRAQ4plex), M2(Oxidation)   | 1785.89975 | 51 | 64  | 4.39 | Expt2 |
| SVMDATQIAGNCLR               | 3  | 112293266                                                                              | N-Term(iTRAQ4plex), C13(Methylthio) | 1781.88260 | 51 | 62  | 4.22 | Expt2 |
| FYQAGLEELSFYAK               | 3  | 15826848;229094614                                                                     | N-Term(iTRAQ4plex), K13(iTRAQ4plex) | 1790.96537 | 51 | 51  | 4.21 | Expt2 |
| TVFGVEPDLTR                  | 10 | 31981273                                                                               | N-Term(iTRAQ4plex)                  | 1377.74993 | 51 | 48  | 4.34 | Expt2 |
| GLTSPQIGVILR                 | 15 | 149257465;149257815;82918395;9439<br>0143                                              | N-Term(iTRAQ4plex)                  | 1397.86467 | 51 | 58  | 3.82 | Expt2 |
| VQISPDSGGLPER                | 5  | 163954948                                                                              | N-Term(iTRAQ4plex)                  | 1498.80327 | 51 | 65  | 4.05 | Expt2 |
| VALYVGMNEPPGAR               | 5  | 31980648                                                                               | N-Term(iTRAQ4plex), M8(Oxidation)   | 1761.91216 | 51 | 67  |      | Expt2 |
| VETPVLPPVLVPR                | 3  | 84490384;31560568;254675249                                                            | N-Term(iTRAQ4plex)                  | 1559.96758 | 51 | 43  | 4.15 | Expt2 |
| VPLDVIFK                     | 2  | 31543108;63054837                                                                      | N-Term(iTRAQ4plex), K8(iTRAQ4plex)  | 1218.77239 | 51 | 63  |      | Expt2 |
| IDVEEMLTNNR                  | 3  | 23346461                                                                               | N-Term(iTRAQ4plex)                  | 1606.78935 | 51 | 46  | 4.07 | Expt2 |
| LNSNTQVLLSATMPSDVLVTK        | 6  | 21450625;226823309                                                                     | N-Term(iTRAQ4plex), K23(iTRAQ4plex) | 2747.51529 | 51 | 54  | 6.09 | Expt2 |
| QLSSGVSEIR                   | 12 | 158937312                                                                              | N-Term(iTRAQ4plex)                  | 1219.67815 | 51 | 61  | 4.06 | Expt2 |
| ATQALVLAPTR                  | 10 | 21450625;149270417;226823309                                                           | N-Term(iTRAQ4plex)                  | 1284.78179 | 51 | 70  | 3.62 | Expt2 |
| LEGNPIALGK                   | 6  | 6679166                                                                                | N-Term(iTRAQ4plex), K10(iTRAQ4plex) | 1299.79424 | 51 | 66  | 3.76 | Expt2 |
| ILEFFGLK                     | 4  | 42415475                                                                               | N-Term(iTRAQ4plex), K8(iTRAQ4plex)  | 1254.78398 | 51 | 66  |      | Expt2 |
| GIAGLDGVAEVR                 | 11 | 24418919                                                                               | N-Term(iTRAQ4plex)                  | 1300.73320 | 51 | 65  | 4.03 | Expt2 |
| ILVATNLFGR                   | 12 | 9790069;38372907                                                                       | N-Term(iTRAQ4plex)                  | 1247.76567 | 51 | 55  | 3.43 | Expt2 |
| MLIDAGVDALR                  | 12 | 149259047;31981382                                                                     | N-Term(iTRAQ4plex)                  | 1300.73369 | 51 | 54  | 0.99 | Expt2 |
| GVTIASGGVLPFR                | 6  | 46250738                                                                               | N-Term(iTRAQ4plex)                  | 1270.76409 | 51 | 54  | 3.62 | Expt2 |
| LLPELEVLK                    | 16 | 111185907                                                                              | N-Term(iTRAQ4plex)                  | 1225.76653 | 51 | 53  |      | Expt2 |
| GLPILVELLR                   | 2  | 112363090;147899467;51491821                                                           | N-Term(iTRAQ4plex)                  | 1266.82964 | 51 | 51  |      | Expt2 |
| LVHIEGDLER                   | 7  | 40254525                                                                               | N-Term(iTRAQ4plex)                  | 1300.76555 | 51 | 50  |      | Expt2 |
| LLQLOEQMR                    | 4  | 82950147;82950149;149264086                                                            | N-Term(iTRAQ4plex)                  | 1302.73235 | 51 | 45  | 3.64 | Expt2 |
| DVVLAYPEVR                   | 9  | 150456419                                                                              | N-Term(iTRAQ4plex)                  | 1304.73271 | 51 | 43  | 4.10 | Expt2 |
| GYAVAVVK                     | 3  | 20330802                                                                               | N-Term(iTRAQ4plex), K9(iTRAQ4plex)  | 1257.75823 | 51 | 39  | 3.71 | Expt2 |
| FAISELFAK                    | 4  | 84875537                                                                               | N-Term(iTRAQ4plex), K9(iTRAQ4plex)  | 1313.78020 | 51 | 72  | 3.68 | Expt2 |
| VTAVNDIAEQLLK                | 4  | 55926127                                                                               | N-Term(iTRAQ4plex), K13(iTRAQ4plex) | 1702.00530 | 51 | 116 | 4.94 | Expt2 |
| DDLLGFSLR                    | 2  | 149258641;149258643;54292132                                                           | N-Term(iTRAQ4plex)                  | 1179.65007 | 51 | 43  |      | Expt2 |



|                                |    |                                                                                                          |                                                                       |            |    |    |      |      |       |
|--------------------------------|----|----------------------------------------------------------------------------------------------------------|-----------------------------------------------------------------------|------------|----|----|------|------|-------|
| GVNQOEEEDNGCLK                 | 3  | 148277039                                                                                                | N-Term(iTRAQ4plex), N10(Deamidated), C12(Methylthio), K14(iTRAQ4plex) | 1869.86394 | 51 | 62 |      | 4.70 | Expt2 |
| SFLDLLLNATGK                   | 3  | 25141235;6753620;14861844                                                                                | N-Term(iTRAQ4plex), K12(iTRAQ4plex)                                   | 1579.93521 | 51 | 56 |      | 3.65 | Expt2 |
| DFMIQGGDFTR                    | 7  | 71774133                                                                                                 | N-Term(iTRAQ4plex), M3(Oxidation)                                     | 1446.68328 | 51 | 48 |      |      | Expt2 |
| APDAWDYSQGFVNEEMIR             | 10 | 19745150                                                                                                 | N-Term(iTRAQ4plex)                                                    | 2272.05010 | 51 | 82 |      | 5.35 | Expt2 |
| LLGLGVTDFSR                    | 6  | 29336026                                                                                                 | N-Term(iTRAQ4plex)                                                    | 1321.75871 | 51 | 64 |      | 4.08 | Expt2 |
| LLVSMCQGNR                     | 5  | 160707958                                                                                                | N-Term(iTRAQ4plex), C6(Methylthio)                                    | 1310.65361 | 51 | 41 |      |      | Expt2 |
| IEPAQVAEVEPLPEDYTRPVNLTEVTLQOR | 2  | 13385798                                                                                                 | N-Term(iTRAQ4plex)                                                    | 3914.02846 | 51 |    |      | 4.91 | Expt2 |
| GFAFVOYVNER                    | 7  | 8393544;283436180;283436176;283436182                                                                    | N-Term(iTRAQ4plex)                                                    | 1473.76262 | 51 | 52 |      | 4.42 | Expt2 |
| GVLYQTVSR                      | 35 | 6753484                                                                                                  | N-Term(iTRAQ4plex)                                                    | 1166.66631 | 51 | 53 |      |      | Expt2 |
| LEMEIETYR                      | 42 | 118130981                                                                                                | N-Term(iTRAQ4plex), M3(Oxidation)                                     | 1343.66142 | 51 | 44 |      |      | Expt2 |
| EFDALLINPR                     | 3  | 6753960                                                                                                  | N-Term(iTRAQ4plex)                                                    | 1331.74272 | 51 | 39 |      | 3.82 | Expt2 |
| DSTLIMOLLR                     | 40 | 226874906;31543976;149251472;149263879;134023662;6756037;6756041;6756039;31543974                        | N-Term(iTRAQ4plex), M6(Oxidation)                                     | 1349.76238 | 51 | 56 |      |      | Expt2 |
| LLEGECCR                       | 44 | 29789317;47059013;124487419;149261714;85701680;20911031;124286811;133778953;54607171;113195684;269914154 | N-Term(iTRAQ4plex), C7(Methylthio)                                    | 1138.53618 | 51 | 47 |      | 3.56 | Expt2 |
| DGSVSVMDYYEPR                  | 3  | 23346525                                                                                                 | N-Term(iTRAQ4plex)                                                    | 1661.76030 | 51 | 61 |      | 4.15 | Expt2 |
| VPALLEQIMSDTFEK                | 5  | 27370012                                                                                                 | N-Term(iTRAQ4plex), K16(iTRAQ4plex)                                   | 2140.08048 | 51 | 64 |      | 4.01 | Expt2 |
| NNQFQALLOVADPVNAQYAK           | 3  | 30039680;255003709                                                                                       | N-Term(iTRAQ4plex), K20(iTRAQ4plex)                                   | 2584.34616 | 51 | 80 |      | 5.04 | Expt2 |
| IMNTFSVWPSPK                   | 9  | 31981939;7106439;22165384;149253488;149253527;83030206;12963615                                          | N-Term(iTRAQ4plex), K12(iTRAQ4plex)                                   | 1607.91387 | 51 | 67 |      | 3.79 | Expt2 |
| ELGGESNFGDALLDAGESMK           | 3  | 7305485                                                                                                  | N-Term(iTRAQ4plex), K20(iTRAQ4plex)                                   | 2328.13474 | 51 | 49 |      | 4.42 | Expt2 |
| GEVQTVTFDTDEVK                 | 46 | 111074529                                                                                                | N-Term(iTRAQ4plex), K14(iTRAQ4plex)                                   | 1855.95378 | 51 | 88 |      | 6.81 | Expt2 |
| YGVNPGPIVGTTR                  | 6  | 121949767;121949779;121949760;121949763;121949765;121949769                                              | N-Term(iTRAQ4plex)                                                    | 1474.81682 | 51 | 48 |      | 4.00 | Expt2 |
| LVSYPYDMAR                     | 13 | 160707889                                                                                                | N-Term(iTRAQ4plex)                                                    | 1358.68840 | 51 | 48 |      | 3.45 | Expt2 |
| YFESVLDR                       | 11 | 9789943                                                                                                  | N-Term(iTRAQ4plex)                                                    | 1172.60625 | 51 | 42 |      |      | Expt2 |
| EQLAQAVAR                      | 2  | 19527028                                                                                                 | N-Term(iTRAQ4plex)                                                    | 1129.64617 | 51 | 45 |      |      | Expt2 |
| DMILQFISR                      | 4  | 87299637                                                                                                 | N-Term(iTRAQ4plex)                                                    | 1266.70061 | 51 | 40 |      |      | Expt2 |
| TVQELLPASFGPEDLOK              | 4  | 58037289                                                                                                 | N-Term(iTRAQ4plex), K17(iTRAQ4plex)                                   | 2160.18071 | 51 | 74 |      | 4.49 | Expt2 |
| ASDDLGEPDVFATAPFR              | 3  | 149255330                                                                                                | N-Term(iTRAQ4plex)                                                    | 1951.94963 | 51 | 86 |      | 4.26 | Expt2 |
| APOETYADIGGLDNOIQEIK           | 7  | 6679501                                                                                                  | N-Term(iTRAQ4plex), K20(iTRAQ4plex)                                   | 2491.29636 | 51 | 83 |      | 5.91 | Expt2 |
| QLEADILDVNIQIFK                | 3  | 19527102                                                                                                 | N-Term(iTRAQ4plex), K14(iTRAQ4plex)                                   | 1934.09104 | 51 | 59 |      | 3.64 | Expt2 |
| SPIVQVWFLEPSDK                 | 10 | 167736365                                                                                                | N-Term(iTRAQ4plex), K14(iTRAQ4plex)                                   | 1935.05437 | 51 | 59 | 0.99 | 4.09 | Expt2 |
| YWQQVIDMNDYQOR                 | 2  | 6678499                                                                                                  | N-Term(iTRAQ4plex)                                                    | 1902.89336 | 51 | 52 |      |      | Expt2 |
| AELNEFLTR                      | 13 | 6755372                                                                                                  | N-Term(iTRAQ4plex)                                                    | 1236.67082 | 51 | 45 |      | 3.62 | Expt2 |
| GNVOVVIPFLTESYSSSDPPEK         | 4  | 6678483                                                                                                  | N-Term(iTRAQ4plex), K23(iTRAQ4plex)                                   | 2809.45145 | 51 | 38 |      | 4.70 | Expt2 |
| GFPGMYTDLATIYER                | 9  | 19527064;19705578                                                                                        | N-Term(iTRAQ4plex)                                                    | 2040.98984 | 51 | 53 |      | 3.82 | Expt2 |
| FDVSGLTTEQMLR                  | 3  | 27597069                                                                                                 | N-Term(iTRAQ4plex)                                                    | 1640.84868 | 51 | 72 |      | 3.74 | Expt2 |
| QLDSIIIGER                     | 35 | 54607171;113195684                                                                                       | N-Term(iTRAQ4plex)                                                    | 1174.65625 | 51 | 63 |      | 3.54 | Expt2 |
| IDFSSIAVPGTSNPQOR              | 3  | 63003917                                                                                                 | N-Term(iTRAQ4plex)                                                    | 1961.01921 | 51 | 73 |      | 4.75 | Expt2 |
| GGVIAGSPAPPELLIR               | 6  | 24418933                                                                                                 | N-Term(iTRAQ4plex)                                                    | 1577.91435 | 51 | 63 |      | 4.09 | Expt2 |
| AIQLEYSEAR                     | 5  | 19705424                                                                                                 | N-Term(iTRAQ4plex)                                                    | 1323.70281 | 51 | 45 |      | 3.80 | Expt2 |
| ALQIEACNK                      | 2  | 172072643                                                                                                | N-Term(iTRAQ4plex), C7(Methylthio), K9(iTRAQ4plex)                    | 1323.70281 | 51 |    |      |      | Expt2 |
| TTLSTFQSPFVSVTR                | 5  | 18034769                                                                                                 | N-Term(iTRAQ4plex)                                                    | 1844.95732 | 51 | 67 |      | 4.91 | Expt2 |
| WLPEYAGOR                      | 8  | 82950147;82950149;149264086                                                                              | N-Term(iTRAQ4plex)                                                    | 1263.66155 | 51 | 33 |      |      | Expt2 |
| GEYDVTVPR                      | 13 | 61743961                                                                                                 | N-Term(iTRAQ4plex)                                                    | 1179.61553 | 51 | 57 |      | 3.73 | Expt2 |
| SILFVPTSAPR                    | 12 | 6755863                                                                                                  | N-Term(iTRAQ4plex)                                                    | 1331.78252 | 51 | 44 |      | 3.60 | Expt2 |
| LGDDIDLIVR                     | 4  | 125628629                                                                                                | N-Term(iTRAQ4plex)                                                    | 1272.73296 | 51 | 59 |      | 3.73 | Expt2 |
| TEIHLATR                       | 20 | 6755372                                                                                                  | N-Term(iTRAQ4plex)                                                    | 1173.73320 | 51 | 41 |      | 3.53 | Expt2 |
| VDTWFNQPAR                     | 13 | 149251177;149252074;94397192                                                                             | N-Term(iTRAQ4plex)                                                    | 1377.70415 | 51 | 41 |      | 4.35 | Expt2 |
| TSOPTMSSFR                     | 14 | 111074529                                                                                                | N-Term(iTRAQ4plex)                                                    | 1272.60430 | 51 | 53 |      | 3.74 | Expt2 |
| EILIPVFK                       | 4  | 29293809                                                                                                 | N-Term(iTRAQ4plex), K8(iTRAQ4plex)                                    | 1246.80974 | 51 | 45 |      |      | Expt2 |
| VTVVDVNEAR                     | 3  | 6678499                                                                                                  | N-Term(iTRAQ4plex)                                                    | 1245.69267 | 51 | 53 |      | 4.09 | Expt2 |
| IOLLEELDR                      | 11 | 47894398                                                                                                 | N-Term(iTRAQ4plex)                                                    | 1401.77092 | 51 | 52 |      | 4.04 | Expt2 |

|                                    |    |                              |                                                                    |            |    |     |      |      |       |
|------------------------------------|----|------------------------------|--------------------------------------------------------------------|------------|----|-----|------|------|-------|
| GEEWLLNEIR                         | 23 | 61097906;11230802;157951643  | N-Term(iTRAQ4plex)                                                 | 1565.81438 | 51 | 57  |      | 4.45 | Expt2 |
| SVMPPPGIK                          | 29 | 160333372                    | N-Term(iTRAQ4plex), K10(iTRAQ4plex)                                | 1312.80071 | 51 | 78  |      | 3.74 | Expt2 |
| SPLVATAVAAR                        | 4  | 6753620;14861844             | N-Term(iTRAQ4plex)                                                 | 1312.81023 | 51 | 57  |      | 3.84 | Expt2 |
| ELEEDFIR                           | 13 | 19482160                     | N-Term(iTRAQ4plex)                                                 | 1194.61223 | 51 | 42  |      |      | Expt2 |
| DLASVQALLR                         | 7  | 115496850                    | N-Term(iTRAQ4plex)                                                 | 1229.73772 | 51 | 59  |      | 3.72 | Expt2 |
| ILVCLQGSR                          | 13 | 149265291;22165408           | N-Term(iTRAQ4plex), C4(Methylthio)                                 | 1291.73320 | 51 | 45  |      | 3.63 | Expt2 |
| YLCIPAADTPSONLTR                   | 2  | 19527288;83816915            | N-Term(iTRAQ4plex), C3(Methylthio)                                 | 1952.96843 | 51 | 42  |      |      | Expt2 |
| EQLAIAEFAR                         | 12 | 110625624                    | N-Term(iTRAQ4plex)                                                 | 1291.71245 | 51 | 57  |      | 4.19 | Expt2 |
| CVLIFGVPSR                         | 2  | 34328485                     | N-Term(iTRAQ4plex), C1(Methylthio)                                 | 1280.69963 | 51 | 36  |      |      | Expt2 |
| EGSSIGAIISR                        | 3  | 13385942                     | N-Term(iTRAQ4plex)                                                 | 1235.63750 | 51 | 42  |      | 4.23 | Expt2 |
| YNLGAPVAGTCYQAEWDDVVPK             | 4  | 84794552                     | N-Term(iTRAQ4plex), C11(Methylthio), K22(iTRAQ4plex)               | 2794.31595 | 51 | 71  |      | 4.97 | Expt2 |
| DIELVMSQANVSR                      | 6  | 41350312;163965357           | N-Term(iTRAQ4plex), M6(Oxidation)                                  | 1621.83696 | 51 | 77  |      |      | Expt2 |
| DIELVMAQANVTR                      | 3  | 126116574                    | N-Term(iTRAQ4plex), M6(Oxidation), Q8(Deamidated), N10(Deamidated) | 1621.83696 | 51 | 49  |      |      | Expt2 |
| APSWIDTGLSEMR                      | 7  | 6753530                      | N-Term(iTRAQ4plex)                                                 | 1606.80217 | 50 | 56  |      | 4.02 | Expt2 |
| AGVLAQLEER                         | 11 | 29336026                     | N-Term(iTRAQ4plex)                                                 | 1358.74077 | 50 | 65  |      | 3.83 | Expt2 |
| QTNPAMEVEEDDPVPEIR                 | 6  | 225543319;94408011           | N-Term(iTRAQ4plex), M7(Oxidation)                                  | 2316.08237 | 50 | 64  |      | 4.99 | Expt2 |
| DTCFSTEGPNLVTR                     | 5  | 163310765                    | N-Term(iTRAQ4plex), C3(Methylthio)                                 | 1729.80301 | 50 | 55  |      | 4.26 | Expt2 |
| DEAAAAAGGEGAAAPGEGAGGAGAEAGGGEPR   | 14 | 6678768                      | N-Term(iTRAQ4plex)                                                 | 2895.32755 | 50 | 105 |      | 5.76 | Expt2 |
| MPTLGLGTWK                         | 2  | 160707894                    | N-Term(iTRAQ4plex), K10(iTRAQ4plex)                                | 1391.79741 | 50 | 72  |      |      | Expt2 |
| TLDVNDQSELR                        | 4  | 6677835                      | N-Term(iTRAQ4plex)                                                 | 1433.73918 | 50 | 61  |      |      | Expt2 |
| FATEAAILTR                         | 10 | 110625624                    | N-Term(iTRAQ4plex)                                                 | 1349.79485 | 50 | 60  |      | 4.03 | Expt2 |
| DLELLIQATIR                        | 6  | 6679158;254750698            | N-Term(iTRAQ4plex)                                                 | 1416.82512 | 50 | 58  |      | 3.87 | Expt2 |
| ILIGFPLGSSLR                       | 16 | 167736365                    | N-Term(iTRAQ4plex)                                                 | 1416.87273 | 50 | 58  |      | 3.67 | Expt2 |
| LAPEYEAATR                         | 6  | 112293264                    | N-Term(iTRAQ4plex)                                                 | 1335.70500 | 50 | 56  |      |      | Expt2 |
| YLAEVACGDDR                        | 25 | 149275178;6756039            | N-Term(iTRAQ4plex), C7(Methylthio)                                 | 1401.62786 | 50 | 53  |      | 4.13 | Expt2 |
| EIEAYGOQLR                         | 14 | 111185907                    | N-Term(iTRAQ4plex)                                                 | 1350.71623 | 50 | 48  |      | 3.75 | Expt2 |
| FSMVQVWPVR                         | 9  | 31560731                     | N-Term(iTRAQ4plex)                                                 | 1392.76457 | 50 | 46  |      | 3.91 | Expt2 |
| DAAQSSPAFGDR                       | 3  | 149252624;34328485           | N-Term(iTRAQ4plex)                                                 | 1365.65459 | 50 | 43  |      | 3.40 | Expt2 |
| LFGAPEPSTIAR                       | 2  | 226442901                    | N-Term(iTRAQ4plex)                                                 | 1402.78166 | 50 | 39  |      |      | Expt2 |
| GIADVPEWFR                         | 3  | 21313520                     | N-Term(iTRAQ4plex)                                                 | 1333.70195 | 50 | 38  |      | 3.40 | Expt2 |
| AEVAEFLNDR                         | 2  | 162135936;162287057          | N-Term(iTRAQ4plex)                                                 | 1378.71123 | 50 | 36  |      |      | Expt2 |
| DYLLCDYNR                          | 7  | 6753262;83649737             | N-Term(iTRAQ4plex), C5(Methylthio)                                 | 1364.61382 | 50 | 34  |      | 3.40 | Expt2 |
| AQDIEAGDGTTSVVIAGSLDSCCK           | 5  | 6753322                      | N-Term(iTRAQ4plex), C24(Methylthio), K26(iTRAQ4plex)               | 2898.46982 | 50 | 107 |      | 5.80 | Expt2 |
| EVGVDDVNFPK                        | 4  | 61743961                     | N-Term(iTRAQ4plex), K10(iTRAQ4plex)                                | 1391.77812 | 50 | 69  | 0.99 | 3.44 | Expt2 |
| SETSGSFEDALLAIK                    | 4  | 161016799                    | N-Term(iTRAQ4plex), K16(iTRAQ4plex)                                | 1955.05863 | 50 |     |      | 5.32 | Expt2 |
| GVDIVMDPLGSDTAK                    | 8  | 33859662                     | N-Term(iTRAQ4plex), K16(iTRAQ4plex)                                | 1862.97379 | 50 | 50  |      | 5.33 | Expt2 |
| LEDVLPFAFR                         | 8  | 171543869;171543871          | N-Term(iTRAQ4plex)                                                 | 1417.81853 | 50 | 45  |      | 3.80 | Expt2 |
| LLYNNVSNFGR                        | 6  | 51491845                     | N-Term(iTRAQ4plex)                                                 | 1440.77300 | 50 | 58  |      | 4.12 | Expt2 |
| GSPMALLAAR                         | 4  | 161484644                    | N-Term(iTRAQ4plex)                                                 | 1243.72893 | 50 | 62  |      | 3.45 | Expt2 |
| LPEDDEPPARPPAPAGASPLAEPAAPPSTPAAPK | 4  | 34610241;34610235;34610233   | N-Term(iTRAQ4plex), K34(iTRAQ4plex)                                | 3570.87050 | 50 | 35  |      | 4.85 | Expt2 |
| EQVANSAFVER                        | 13 | 40556608                     | N-Term(iTRAQ4plex)                                                 | 1393.72112 | 50 | 71  |      | 4.15 | Expt2 |
| FIEDELQIPVK                        | 8  | 31560737                     | N-Term(iTRAQ4plex), K11(iTRAQ4plex)                                | 1618.93413 | 50 | 51  |      | 4.02 | Expt2 |
| SOVSPQGLQVR                        | 3  | 110735428;110735426          | N-Term(iTRAQ4plex)                                                 | 1342.75554 | 50 | 38  |      | 3.70 | Expt2 |
| LTOQAGDLTPVAGGQR                   | 3  | 124487362                    | N-Term(iTRAQ4plex)                                                 | 1755.95134 | 50 | 81  |      | 5.25 | Expt2 |
| VGILLSPPHP                         | 4  | 13384766                     | N-Term(iTRAQ4plex)                                                 | 1250.72270 | 50 | 45  |      | 3.50 | Expt2 |
| WTELLPLIQYEVVR                     | 3  | 31981748;285402638;285402659 | N-Term(iTRAQ4plex)                                                 | 2031.14371 | 50 | 68  |      | 3.79 | Expt2 |
| ETPPDALILESPFTNIR                  | 3  | 159110817                    | N-Term(iTRAQ4plex)                                                 | 2057.10953 | 50 | 46  |      | 3.71 | Expt2 |
| GAAMVTAVAYR                        | 3  | 225735584;225735582;7305143  | N-Term(iTRAQ4plex)                                                 | 1253.68022 | 50 | 46  |      | 3.84 | Expt2 |
| NDQCYYDIR                          | 5  | 94394941;31542413            | N-Term(iTRAQ4plex), C4(Methylthio)                                 | 1331.54949 | 50 | 43  |      | 3.59 | Expt2 |
| GNLGAGNGNLQGR                      | 3  | 25141233                     | N-Term(iTRAQ4plex), N7(Deamidated)                                 | 1469.76018 | 50 | 74  |      | 5.24 | Expt2 |
| AATADLEQYDR                        | 3  | 153792449;194440700          | N-Term(iTRAQ4plex)                                                 | 1396.68620 | 50 | 58  |      | 3.88 | Expt2 |
| LLWENGLLR                          | 4  | 126518317                    | N-Term(iTRAQ4plex), N5(Deamidated)                                 | 1372.77117 | 50 | 37  |      | 3.41 | Expt2 |
| FSMVIDNGIVK                        | 8  | 6755114                      | N-Term(iTRAQ4plex), M3(Oxidation), N7(Deamidated), K11(iTRAQ4plex) | 1527.83415 | 50 | 78  |      | 3.94 | Expt2 |
| ESLPSTVSANSLYPEGER                 | 7  | 62079289                     | N-Term(iTRAQ4plex)                                                 | 2209.07573 | 50 | 85  | 1.23 | 4.07 | Expt2 |
| GYEASVDSLTFGAVTGPDPSEAGTK          | 8  | 6678329                      | N-Term(iTRAQ4plex), K26(iTRAQ4plex)                                | 2873.40049 | 50 | 65  |      | 6.28 | Expt2 |

|                             |    |                                                                                                      |                                                     |            |    |     |      |      |       |
|-----------------------------|----|------------------------------------------------------------------------------------------------------|-----------------------------------------------------|------------|----|-----|------|------|-------|
| NVIDGDLCEQFNSMEPNK          | 4  | 19527174                                                                                             | N-Term(iTRAQ4plex), C8(Methylthio), K18(iTRAQ4plex) | 2387.10184 | 50 | 60  | 1.17 | 4.45 | Expt2 |
| APCLVGFHAR                  | 8  | 110625656;270309161                                                                                  | N-Term(iTRAQ4plex)                                  | 1343.79265 | 50 | 49  |      | 3.95 | Expt2 |
| QDIAFAYQR                   | 33 | 149260099;6996913                                                                                    | N-Term(iTRAQ4plex)                                  | 1255.65544 | 50 | 46  |      | 3.75 | Expt2 |
| SLGPPGPPFNITPR              | 3  | 149270772;149270774;153791796                                                                        | N-Term(iTRAQ4plex)                                  | 1593.88762 | 50 | 54  |      | 3.61 | Expt2 |
| VLTWESGMR                   | 18 | 111074529                                                                                            | N-Term(iTRAQ4plex)                                  | 1222.63738 | 50 | 48  |      |      | Expt2 |
| LTGECGLGWMR                 | 4  | 82950147;82950149;149264086                                                                          | N-Term(iTRAQ4plex), C5(Methylthio)                  | 1355.64141 | 50 | 44  |      | 3.96 | Expt2 |
| IVILPDYLEIAR                | 8  | 7305619                                                                                              | N-Term(iTRAQ4plex)                                  | 1558.93852 | 50 | 41  | 0.98 | 3.48 | Expt2 |
| AALTMFSTIIR                 | 2  | 123173870                                                                                            | N-Term(iTRAQ4plex)                                  | 1367.78423 | 50 | 47  |      |      | Expt2 |
| IGLAQYSGDPR                 | 4  | 226423922                                                                                            | N-Term(iTRAQ4plex)                                  | 1320.70305 | 50 | 51  |      | 3.75 | Expt2 |
| LSDAGLPSR                   | 23 | 6680554                                                                                              | N-Term(iTRAQ4plex)                                  | 1059.59180 | 50 | 60  |      |      | Expt2 |
| EILSPVDIHDR                 | 2  | 18017590                                                                                             | N-Term(iTRAQ4plex)                                  | 1413.80962 | 50 | 50  |      |      | Expt2 |
| ENAYDEANLAVLK               | 3  | 21312044                                                                                             | N-Term(iTRAQ4plex), K14(iTRAQ4plex)                 | 1851.01352 | 50 | 41  |      | 3.70 | Expt2 |
| VVITYGMANLLTGPK             | 9  | 33859662                                                                                             | N-Term(iTRAQ4plex), K14(iTRAQ4plex)                 | 1752.00359 | 50 | 114 |      | 4.58 | Expt2 |
| WTGDNMFFIK                  | 2  | 194328704;194328702;194328706;18700026;194328708                                                     | N-Term(iTRAQ4plex), K10(iTRAQ4plex)                 | 1546.80168 | 50 |     |      | 3.59 | Expt2 |
| FNPVFTSDR                   | 6  | 6677777;82942232;82958980                                                                            | N-Term(iTRAQ4plex)                                  | 1226.62920 | 50 | 36  |      |      | Expt2 |
| LLDFGSLNLQVTOPTVGMNFK       | 6  | 149261626;149261791;6677801                                                                          | N-Term(iTRAQ4plex), M19(Oxidation), K22(iTRAQ4plex) | 2713.45401 | 50 | 73  |      | 5.54 | Expt2 |
| DGVANVSIEDR                 | 12 | 45597447                                                                                             | N-Term(iTRAQ4plex)                                  | 1318.67290 | 50 | 71  |      | 4.08 | Expt2 |
| TCVDINECCR                  | 5  | 168693628                                                                                            | N-Term(iTRAQ4plex), C2(Methylthio), C8(Methylthio)  | 1416.58489 | 50 | 44  |      | 3.85 | Expt2 |
| LPVDMAYK                    | 2  | 82950147;82950149;149264086                                                                          | N-Term(iTRAQ4plex), K8(iTRAQ4plex)                  | 1224.70305 | 50 | 60  |      |      | Expt2 |
| VILQDFTGPAVVDFAAMR          | 3  | 110347487                                                                                            | N-Term(iTRAQ4plex), M18(Oxidation)                  | 2209.18558 | 50 | 58  |      | 4.59 | Expt2 |
| TEAESWYTK                   | 3  | 20911031                                                                                             | N-Term(iTRAQ4plex), K10(iTRAQ4plex)                 | 1530.77214 | 50 | 71  |      | 4.36 | Expt2 |
| NQLEEVPSALPR                | 33 | 229608920                                                                                            | N-Term(iTRAQ4plex)                                  | 1496.82231 | 50 | 66  | 0.98 | 4.59 | Expt2 |
| FAYNLIK                     | 18 | 22203747                                                                                             | N-Term(iTRAQ4plex), K8(iTRAQ4plex)                  | 1284.75115 | 50 | 50  |      | 3.84 | Expt2 |
| AGEVINOPMMAAR               | 4  | 31543942                                                                                             | N-Term(iTRAQ4plex)                                  | 1662.82744 | 50 | 54  | 0.99 | 4.22 | Expt2 |
| VPVGDQPPDIEYQIK             | 2  | 87299637                                                                                             | N-Term(iTRAQ4plex), K15(iTRAQ4plex)                 | 1986.08329 | 50 |     |      | 4.59 | Expt2 |
| VANVSLALYK                  | 6  | 149250977;94363969                                                                                   | N-Term(iTRAQ4plex), K11(iTRAQ4plex)                 | 1478.92595 | 50 | 88  | 0.99 | 4.72 | Expt2 |
| OIVAGTNLFK                  | 7  | 6681071                                                                                              | N-Term(iTRAQ4plex), K11(iTRAQ4plex)                 | 1491.91924 | 50 | 86  |      | 4.26 | Expt2 |
| YVPNSGQEDADR                | 4  | 6755781                                                                                              | N-Term(iTRAQ4plex)                                  | 1494.69487 | 50 | 72  |      |      | Expt2 |
| SLTPGQPADQLLR               | 2  | 161484644                                                                                            | N-Term(iTRAQ4plex)                                  | 1539.86565 | 50 | 65  |      |      | Expt2 |
| AFQGLLDSYSVR                | 5  | 31982089                                                                                             | N-Term(iTRAQ4plex)                                  | 1499.79827 | 50 | 58  |      | 3.62 | Expt2 |
| NAVEEYVYEMR                 | 11 | 112293266                                                                                            | N-Term(iTRAQ4plex)                                  | 1546.73467 | 50 | 52  |      | 4.52 | Expt2 |
| FDYIFFTGSPR                 | 11 | 82997826;38084778;94405733                                                                           | N-Term(iTRAQ4plex)                                  | 1493.75920 | 50 | 49  |      | 3.97 | Expt2 |
| FILNLPFSVR                  | 13 | 227116345                                                                                            | N-Term(iTRAQ4plex)                                  | 1450.85820 | 50 | 48  |      | 3.43 | Expt2 |
| DTDIVDEAIYFK                | 5  | 9790141                                                                                              | N-Term(iTRAQ4plex), K13(iTRAQ4plex)                 | 1879.95769 | 50 | 87  |      | 4.98 | Expt2 |
| AINOGGLTSVAVR               | 7  | 6755198                                                                                              | N-Term(iTRAQ4plex)                                  | 1429.82646 | 50 | 70  |      | 4.43 | Expt2 |
| QITQVYGFYDECLR              | 15 | 9790175;8394024;149258657;9506983                                                                    | N-Term(iTRAQ4plex), C12(Methylthio)                 | 1924.90532 | 49 | 64  |      | 4.20 | Expt2 |
| IILQSR                      | 15 | 157041244;157041246;157041248                                                                        | N-Term(iTRAQ4plex), Q5(Deamidated)                  | 987.63176  | 49 | 34  |      |      | Expt2 |
| LILIESR                     | 15 | 149257465;82918395                                                                                   | N-Term(iTRAQ4plex)                                  | 987.63176  | 49 | 34  |      |      | Expt2 |
| SLDLFGCEVTNR                | 11 | 18700032                                                                                             | N-Term(iTRAQ4plex), C7(Methylthio)                  | 1543.74101 | 49 | 70  |      | 4.02 | Expt2 |
| IVLLQR                      | 16 | 6755212                                                                                              | N-Term(iTRAQ4plex)                                  | 984.67204  | 49 | 37  |      |      | Expt2 |
| VOISLVQYSR                  | 41 | 111074529                                                                                            | N-Term(iTRAQ4plex)                                  | 1336.77271 | 49 | 56  |      | 4.23 | Expt2 |
| LFVTNDAATILR                | 8  | 126723461                                                                                            | N-Term(iTRAQ4plex)                                  | 1477.84870 | 49 | 69  |      | 4.67 | Expt2 |
| FPGQLNADLR                  | 21 | 33859488;31981939;7106439;22165384;21746161;149253488;149253527;83030206;124430500;27754056;12963615 | N-Term(iTRAQ4plex)                                  | 1274.69756 | 49 | 49  |      | 3.47 | Expt2 |
| QNSLDEDLIR                  | 10 | 6678483                                                                                              | N-Term(iTRAQ4plex)                                  | 1346.70329 | 49 | 56  |      | 3.98 | Expt2 |
| LFELEEDLFR                  | 6  | 55742711                                                                                             | N-Term(iTRAQ4plex)                                  | 1582.82744 | 49 | 53  |      | 3.92 | Expt2 |
| QAADMILLDDNFASIVTGVVEGR     | 3  | 21450277;30409956;226958351;21450321                                                                 | N-Term(iTRAQ4plex)                                  | 2608.31302 | 49 | 59  |      | 3.88 | Expt2 |
| YSPFFVFGKE                  | 2  | 150456419                                                                                            | N-Term(iTRAQ4plex), K11(iTRAQ4plex)                 | 1605.85954 | 49 | 60  |      |      | Expt2 |
| GVVGPQGAR                   | 17 | 111120329                                                                                            | N-Term(iTRAQ4plex)                                  | 984.57329  | 49 | 51  |      |      | Expt2 |
| VPAATSAIITNDGGINPAQTAGNVFLK | 4  | 13385932                                                                                             | N-Term(iTRAQ4plex), K28(iTRAQ4plex)                 | 3041.69693 | 49 | 113 |      | 5.33 | Expt2 |
| DFDSVPPVVR                  | 4  | 126518317                                                                                            | N-Term(iTRAQ4plex)                                  | 1274.68743 | 49 | 48  |      | 3.51 | Expt2 |
| FDDGAGGDNEVQR               | 3  | 33859604                                                                                             | N-Term(iTRAQ4plex)                                  | 1523.68450 | 49 | 45  |      | 4.03 | Expt2 |
| CEGINISGNFYR                | 11 | 31981945                                                                                             | N-Term(iTRAQ4plex), C1(Methylthio)                  | 1562.72014 | 49 | 43  |      | 4.05 | Expt2 |

|                      |    |                                                                                               |                                                      |            |    |    |      |      |       |
|----------------------|----|-----------------------------------------------------------------------------------------------|------------------------------------------------------|------------|----|----|------|------|-------|
| GTSONDPNVVVR         | 3  | 149249577;47059073                                                                            | N-Term(iTRAQ4plex)                                   | 1516.76372 | 49 | 73 |      | 4.89 | Expt2 |
| YIDSTDLPESTLQEEPVR   | 4  | 172072613                                                                                     | N-Term(iTRAQ4plex)                                   | 2236.11655 | 49 | 62 |      | 3.70 | Expt2 |
| EEEIPETISFEMLDAAK    | 5  | 21312546                                                                                      | N-Term(iTRAQ4plex), K17(iTRAQ4plex)                  | 2240.13333 | 49 | 60 |      | 4.17 | Expt2 |
| QETEVELYNEFFPEPIK    | 4  | 148747526                                                                                     | N-Term(iTRAQ4plex), K16(iTRAQ4plex)                  | 2253.16220 | 49 | 37 |      | 3.86 | Expt2 |
| LAEDFR               | 26 | 21592285;149262636;118130981                                                                  | N-Term(iTRAQ4plex)                                   | 965.52019  | 49 | 41 |      |      | Expt2 |
| QLPIPAELSCVR         | 2  | 27229085                                                                                      | N-Term(iTRAQ4plex), C10(Methylthio)                  | 1515.81890 | 49 | 48 |      |      | Expt2 |
| GVSSGPGMGLMGPR       | 13 | 111120329                                                                                     | N-Term(iTRAQ4plex), M9(Oxidation), M12(Oxidation)    | 1575.77532 | 49 | 58 |      | 4.76 | Expt2 |
| NVEDLSGGELQR         | 4  | 114205431                                                                                     | N-Term(iTRAQ4plex)                                   | 1460.74700 | 49 | 58 |      | 3.92 | Expt2 |
| AFDSGIIPIMEFVVK      | 10 | 29293809                                                                                      | N-Term(iTRAQ4plex), K14(iTRAQ4plex)                  | 1855.98992 | 49 | 72 |      | 3.90 | Expt2 |
| EYLNLYLQDSPEACDYGL   | 4  | 6754090                                                                                       | N-Term(iTRAQ4plex), Y6(iTRAQ4plex), C14(Methylthio)  | 2440.13596 | 49 | 61 |      | 3.77 | Expt2 |
| TVDNFVALATGEK        | 7  | 71774133                                                                                      | N-Term(iTRAQ4plex), K13(iTRAQ4plex)                  | 1652.91484 | 49 | 87 |      | 4.35 | Expt2 |
| GVLFYGGPGCGK         | 8  | 225543319;94408011                                                                            | N-Term(iTRAQ4plex), C10(Methylthio), K12(iTRAQ4plex) | 1528.78984 | 49 | 60 | 1.23 | 3.75 | Expt2 |
| NLQNLILLTAIK         | 9  | 51491845                                                                                      | N-Term(iTRAQ4plex), K12(iTRAQ4plex)                  | 1642.05320 | 49 | 49 |      | 3.80 | Expt2 |
| YIETSELGGAR          | 3  | 71061458;71061455                                                                             | N-Term(iTRAQ4plex), C8(Methylthio)                   | 1488.69670 | 49 | 48 |      | 3.68 | Expt2 |
| GDIASQNMNR           | 4  | 111074529                                                                                     | N-Term(iTRAQ4plex), M9(Oxidation)                    | 1282.60246 | 49 | 40 |      |      | Expt2 |
| AMTGVQWVYR           | 11 | 6753320                                                                                       | N-Term(iTRAQ4plex)                                   | 1481.73406 | 49 | 55 |      | 4.15 | Expt2 |
| TAGWNIPIPMGLYNR      | 2  | 20330802                                                                                      | N-Term(iTRAQ4plex), M8(Oxidation)                    | 1783.87798 | 49 | 59 |      |      | Expt2 |
| VOGGALEESQLVAGVAFK   | 4  | 238814391                                                                                     | N-Term(iTRAQ4plex), K18(iTRAQ4plex)                  | 2091.17630 | 49 | 56 |      | 4.58 | Expt2 |
| MLGQMTDOVADLR        | 5  | 31543942                                                                                      | N-Term(iTRAQ4plex)                                   | 1621.81670 | 49 | 65 |      | 5.28 | Expt2 |
| LESTLNYGMR           | 3  | 29789080                                                                                      | N-Term(iTRAQ4plex)                                   | 1456.72490 | 49 | 46 |      | 4.07 | Expt2 |
| LTVDNAVAR            | 14 | 82950147;82950149;149264086                                                                   | N-Term(iTRAQ4plex)                                   | 1102.63469 | 49 | 52 |      | 3.98 | Expt2 |
| ADIVENQVMDTR         | 11 | 6754084                                                                                       | N-Term(iTRAQ4plex)                                   | 1534.76543 | 49 | 69 |      | 4.42 | Expt2 |
| STELLIR              | 14 | 30061345;30061339;149246529;82886797;149255259;149255706;38091641;94395563;124486606;30061401 | N-Term(iTRAQ4plex)                                   | 975.59546  | 49 | 58 |      |      | Expt2 |
| ESIESEIR             | 6  | 225543319;94408011                                                                            | N-Term(iTRAQ4plex)                                   | 1106.58391 | 49 | 44 |      | 3.65 | Expt2 |
| NLNPINETLR           | 5  | 158937304                                                                                     | N-Term(iTRAQ4plex)                                   | 1474.81426 | 49 | 56 |      | 4.21 | Expt2 |
| AVENYLIQMAR          | 3  | 149246587                                                                                     | N-Term(iTRAQ4plex)                                   | 1451.77849 | 49 | 55 |      | 4.11 | Expt2 |
| DFTPVCTTELGR         | 46 | 149241041;28916703;6671549                                                                    | N-Term(iTRAQ4plex), C6(Methylthio)                   | 1528.72954 | 49 | 65 |      | 4.18 | Expt2 |
| NFTPVCTTELGR         | 55 | 94371636                                                                                      | N-Term(iTRAQ4plex), N1(Deamidated), C6(Methylthio)   | 1528.72954 | 49 | 65 |      | 4.18 | Expt2 |
| GLOGFLELMR           | 3  | 124249090                                                                                     | N-Term(iTRAQ4plex)                                   | 1307.72588 | 49 | 49 |      | 4.24 | Expt2 |
| LIWDSYTTNK           | 5  | 13937391;6680045;31542899                                                                     | N-Term(iTRAQ4plex), K11(iTRAQ4plex)                  | 1641.90569 | 49 | 76 |      |      | Expt2 |
| LVAYYTLGASGQR        | 6  | 126518317                                                                                     | N-Term(iTRAQ4plex)                                   | 1655.92522 | 49 | 68 |      | 3.61 | Expt2 |
| EIDLLGQTDTR          | 3  | 40018610                                                                                      | N-Term(iTRAQ4plex)                                   | 1632.85771 | 49 | 67 |      | 3.70 | Expt2 |
| ALDTVLFPPPLLTR       | 4  | 149257881                                                                                     | N-Term(iTRAQ4plex)                                   | 1656.98601 | 49 | 66 |      | 3.58 | Expt2 |
| FLTEELSDQDR          | 3  | 6753618                                                                                       | N-Term(iTRAQ4plex)                                   | 1609.82378 | 49 | 64 |      | 3.86 | Expt2 |
| AVVVLVENFYK          | 10 | 21312760                                                                                      | N-Term(iTRAQ4plex), K11(iTRAQ4plex)                  | 1568.93193 | 49 | 62 |      | 3.74 | Expt2 |
| VDLVDENFTELK         | 8  | 31542956                                                                                      | N-Term(iTRAQ4plex)                                   | 1593.82598 | 49 | 61 |      | 4.43 | Expt2 |
| TEMENEFVLK           | 6  | 114145561                                                                                     | N-Term(iTRAQ4plex), K11(iTRAQ4plex)                  | 1640.88994 | 49 | 59 |      | 4.12 | Expt2 |
| LLLATMEALNGGK        | 5  | 85861182                                                                                      | N-Term(iTRAQ4plex), N10(Deamidated), K13(iTRAQ4plex) | 1619.93607 | 49 | 57 |      | 3.70 | Expt2 |
| VLISDSLDPCCR         | 11 | 52353955                                                                                      | N-Term(iTRAQ4plex), C10(Methylthio), C11(Methylthio) | 1556.70940 | 49 | 47 | 0.98 | 3.64 | Expt2 |
| SASLDVEPIYTFR        | 3  | 16418469;285402377                                                                            | N-Term(iTRAQ4plex)                                   | 1641.86345 | 49 | 36 |      | 3.58 | Expt2 |
| LVIITAGAR            | 23 | 6754524;7305229                                                                               | N-Term(iTRAQ4plex)                                   | 1057.68437 | 49 | 42 |      |      | Expt2 |
| WONNLLPSR            | 8  | 24762230;149250304;94372414;149254145;94388628;149261725                                      | N-Term(iTRAQ4plex)                                   | 1271.69829 | 49 | 39 |      |      | Expt2 |
| DVNGQEFVR            | 13 | 94397093;82996042;12963511                                                                    | N-Term(iTRAQ4plex)                                   | 1278.65837 | 49 | 53 |      | 3.98 | Expt2 |
| VTAVIPCFPYAR         | 8  | 10946854;30794182;13386146;256418956                                                          | N-Term(iTRAQ4plex), C7(Methylthio)                   | 1526.79839 | 49 | 47 | 0.98 | 3.67 | Expt2 |
| ELGDYFVDFPK          | 3  | 6681183                                                                                       | N-Term(iTRAQ4plex), K11(iTRAQ4plex)                  | 1617.84856 | 49 | 44 | 1.13 |      | Expt2 |
| LTFVDFLYDVLQNR       | 4  | 6754086                                                                                       | N-Term(iTRAQ4plex)                                   | 2103.09500 | 49 | 59 | 0.99 | 4.61 | Expt2 |
| NIIPFQMTIDDLNEIFPETK | 3  | 149266312;21313679                                                                            | N-Term(iTRAQ4plex), M8(Oxidation), K21(iTRAQ4plex)   | 2797.42746 | 49 | 51 |      | 6.03 | Expt2 |
| SPDDELLYLPVR         | 3  | 189083804;189083806;6755883;189083811;189083815;189083819;189083808;189083813                 | N-Term(iTRAQ4plex)                                   | 1560.84233 | 49 | 60 |      | 4.28 | Expt2 |
| DPQLVPILIDAAR        | 6  | 31982437                                                                                      | N-Term(iTRAQ4plex)                                   | 1564.92339 | 49 | 58 |      |      | Expt2 |
| VVAEPVELAQEFR        | 6  | 82934613;149262115;58037117                                                                   | N-Term(iTRAQ4plex)                                   | 1630.89385 | 49 | 42 |      | 3.86 | Expt2 |
| TSFFOALGITTK         | 6  | 94383772;6671569                                                                              | N-Term(iTRAQ4plex), K12(iTRAQ4plex)                  | 1601.92131 | 49 | 79 |      | 4.86 | Expt2 |
| TFESLVDFCK           | 7  | 111038118                                                                                     | N-Term(iTRAQ4plex), C9(Methylthio), K10(iTRAQ4plex)  | 1522.75847 | 49 | 76 |      | 4.34 | Expt2 |

|                        |    |                                                                                                                                             |                                                      |            |    |     |      |      |       |
|------------------------|----|---------------------------------------------------------------------------------------------------------------------------------------------|------------------------------------------------------|------------|----|-----|------|------|-------|
| DMTSEELDDILR           | 3  | 21450277                                                                                                                                    | N-Term(iTRAQ4plex), M2(Oxidation)                    | 1596.75469 | 49 | 64  |      | 3.98 | Expt2 |
| LVSPGSANETSILVESVTR    | 5  | 145966915                                                                                                                                   | N-Term(iTRAQ4plex)                                   | 2190.18161 | 49 | 68  |      | 4.87 | Expt2 |
| SLEEAEAYS              | 4  | 124249090                                                                                                                                   | N-Term(iTRAQ4plex)                                   | 1298.63469 | 49 | 35  |      | 3.88 | Expt2 |
| LTVDPDMAANCYLVNIPSK    | 3  | 38371755                                                                                                                                    | N-Term(iTRAQ4plex), C11(Methylthio), K19(iTRAQ4plex) | 2412.22409 | 49 | 63  |      | 4.78 | Expt2 |
| AAVQQLQAEGLSPR         | 3  | 27413160                                                                                                                                    | N-Term(iTRAQ4plex)                                   | 1611.89433 | 49 | 41  |      | 4.80 | Expt2 |
| AOAELESVSTALSEAESK     | 8  | 29336026                                                                                                                                    | N-Term(iTRAQ4plex), K18(iTRAQ4plex)                  | 2138.11429 | 49 | 87  |      | 4.07 | Expt2 |
| FVLLLETGDOAGITR        | 3  | 227116322;21746169                                                                                                                          | N-Term(iTRAQ4plex)                                   | 1663.91777 | 49 | 50  |      | 3.46 | Expt2 |
| SMLEVNYPMENGIVR        | 10 | 22122825                                                                                                                                    | N-Term(iTRAQ4plex), M2(Oxidation), N11(Deamidated)   | 1912.92534 | 49 | 77  |      | 4.20 | Expt2 |
| LYMVSDASGSMK           | 4  | 226246550;226246552                                                                                                                         | N-Term(iTRAQ4plex), K12(iTRAQ4plex)                  | 1576.80400 | 49 | 76  |      | 4.10 | Expt2 |
| TIIPLSOCTPK            | 9  | 31982186                                                                                                                                    | N-Term(iTRAQ4plex), C9(Methylthio), K12(iTRAQ4plex)  | 1647.94768 | 49 | 61  |      |      | Expt2 |
| LTLDTIFVPNTGK          | 8  | 6755967                                                                                                                                     | N-Term(iTRAQ4plex), K13(iTRAQ4plex)                  | 1707.00212 | 48 | 90  |      | 3.74 | Expt2 |
| FETLEPEMNALAAR         | 9  | 55926127                                                                                                                                    | N-Term(iTRAQ4plex)                                   | 1735.88786 | 48 | 85  |      | 4.35 | Expt2 |
| ANINVENAFFTLAR         | 6  | 38372905                                                                                                                                    | N-Term(iTRAQ4plex)                                   | 1723.92607 | 48 | 76  |      | 4.54 | Expt2 |
| ELDDLEQWIOER           | 3  | 55926127                                                                                                                                    | N-Term(iTRAQ4plex)                                   | 1717.85381 | 48 | 54  |      | 4.21 | Expt2 |
| LNCEIDIDECR            | 14 | 149261823;164607147                                                                                                                         | N-Term(iTRAQ4plex), C3(Methylthio), C9(Methylthio)   | 1445.56462 | 48 | 50  |      | 4.67 | Expt2 |
| QYSIEAALR              | 4  | 111185907                                                                                                                                   | N-Term(iTRAQ4plex)                                   | 1194.65898 | 48 | 45  |      | 3.42 | Expt2 |
| LLCEGLDQPCR            | 7  | 31981748;285402638;285402659                                                                                                                | N-Term(iTRAQ4plex), C3(Methylthio), C11(Methylthio)  | 1610.73027 | 48 | 36  |      | 4.47 | Expt2 |
| FMELLEPLSER            | 5  | 117938332;117938334                                                                                                                         | N-Term(iTRAQ4plex)                                   | 1507.79961 | 48 | 48  |      | 3.61 | Expt2 |
| LPSLAFLYMEK            | 15 | 229608920                                                                                                                                   | N-Term(iTRAQ4plex), K11(iTRAQ4plex)                  | 1599.90927 | 48 | 49  |      | 4.03 | Expt2 |
| YLGAEYMQSVGNMR         | 6  | 20330802                                                                                                                                    | N-Term(iTRAQ4plex), M7(Oxidation)                    | 1778.83037 | 48 | 61  |      |      | Expt2 |
| EFAGEDTSDLFLEER        | 5  | 38604071                                                                                                                                    | N-Term(iTRAQ4plex)                                   | 1901.88994 | 48 | 95  |      | 4.81 | Expt2 |
| SLGDDISSETSGDFR        | 3  | 149254235;160707925                                                                                                                         | N-Term(iTRAQ4plex)                                   | 1729.79912 | 48 | 56  |      | 4.65 | Expt2 |
| FEEAPDYMYLR            | 8  | 22165382                                                                                                                                    | N-Term(iTRAQ4plex)                                   | 1577.74285 | 48 | 46  |      | 4.19 | Expt2 |
| IPAFGSIPIEFR           | 6  | 77682555                                                                                                                                    | N-Term(iTRAQ4plex)                                   | 1490.84978 | 48 | 47  |      |      | Expt2 |
| TDLLLEPYNK             | 3  | 114326446                                                                                                                                   | N-Term(iTRAQ4plex), K10(iTRAQ4plex)                  | 1493.84514 | 48 | 57  |      | 4.02 | Expt2 |
| GTGFLSIEPLDPR          | 2  | 149269273;94409900;94409902;94409904;126215532;157951698                                                                                    | N-Term(iTRAQ4plex)                                   | 1545.84551 | 48 | 42  |      |      | Expt2 |
| TSPNEGLSGNPADLER       | 3  | 62234487                                                                                                                                    | N-Term(iTRAQ4plex)                                   | 1800.88469 | 48 | 80  |      | 5.27 | Expt2 |
| EANGITSEVLGDLNPIQTDLGR | 10 | 226423935                                                                                                                                   | N-Term(iTRAQ4plex), N3(Deamidated)                   | 2457.26603 | 48 | 67  | 1.06 | 5.80 | Expt2 |
| AAFQLGSPWR             | 10 | 6753036                                                                                                                                     | N-Term(iTRAQ4plex)                                   | 1276.69158 | 48 | 41  |      | 3.81 | Expt2 |
| YLLSOSSPAPLTAEEELR     | 12 | 62990169                                                                                                                                    | N-Term(iTRAQ4plex)                                   | 2219.16996 | 48 | 86  |      | 4.73 | Expt2 |
| FQSVESGANNVFIR         | 3  | 149258050                                                                                                                                   | N-Term(iTRAQ4plex)                                   | 1810.96074 | 48 | 74  |      | 3.95 | Expt2 |
| IQGLTVEQAEAVVR         | 7  | 134288917                                                                                                                                   | N-Term(iTRAQ4plex)                                   | 1656.94670 | 48 | 69  |      | 4.13 | Expt2 |
| NFQYPSSESLAYK          | 3  | 94400773                                                                                                                                    | N-Term(iTRAQ4plex), K13(iTRAQ4plex)                  | 1821.92447 | 48 | 39  |      | 3.95 | Expt2 |
| YPGAYYFIQIK            | 21 | 6753824                                                                                                                                     | N-Term(iTRAQ4plex), K11(iTRAQ4plex)                  | 1650.91545 | 48 | 64  |      | 4.05 | Expt2 |
| GTGIVSAPVVK            | 4  | 82890069;149253083;82898647;82902507;94383782;94383784;149259263;63594466;149263154;149265803;94401827;82993808;94402540;149269353;94404463 | N-Term(iTRAQ4plex), K11(iTRAQ4plex)                  | 1313.80058 | 48 | 51  | 0.99 | 4.27 | Expt2 |
| ILMVLDAAGK             | 5  | 6680722;6680718;6680716;6671571;6680720                                                                                                     | N-Term(iTRAQ4plex), M3(Oxidation), K11(iTRAQ4plex)   | 1391.82390 | 48 | 74  |      |      | Expt2 |
| DTVDPVQDEMLAR          | 4  | 172088119                                                                                                                                   | N-Term(iTRAQ4plex)                                   | 1632.80815 | 48 | 68  |      | 3.98 | Expt2 |
| VAEINVTN               | 31 | 160333372                                                                                                                                   | N-Term(iTRAQ4plex)                                   | 1003.55602 | 48 | 63  |      |      | Expt2 |
| LLLNNDNLLR             | 10 | 149234244;161086971;6671672                                                                                                                 | N-Term(iTRAQ4plex)                                   | 1341.79729 | 48 | 55  |      | 3.66 | Expt2 |
| LMDDLDR                | 25 | 6755392                                                                                                                                     | N-Term(iTRAQ4plex)                                   | 1021.51152 | 48 | 41  |      |      | Expt2 |
| GNPTVEVDLYTAK          | 15 | 149249466;149253386;7305027                                                                                                                 | N-Term(iTRAQ4plex), K13(iTRAQ4plex)                  | 1694.92241 | 48 | 100 |      | 4.92 | Expt2 |
| TFPLDVGSVVGYSGR        | 8  | 6755152                                                                                                                                     | N-Term(iTRAQ4plex)                                   | 1697.90276 | 48 | 92  |      | 3.94 | Expt2 |
| TLPAQGMGTAEVLER        | 6  | 31543694                                                                                                                                    | N-Term(iTRAQ4plex)                                   | 1716.90898 | 48 | 87  |      | 4.37 | Expt2 |
| TLSPPTSAEYQDVR         | 3  | 157057145;157057174;157057554                                                                                                               | N-Term(iTRAQ4plex)                                   | 1764.88640 | 48 | 74  |      | 3.91 | Expt2 |
| TPADCPVIAIDFR          | 12 | 19072792                                                                                                                                    | N-Term(iTRAQ4plex), C5(Methylthio)                   | 1694.84014 | 48 | 73  |      | 4.18 | Expt2 |
| LOGLSVSTGALEQIR        | 4  | 226423935                                                                                                                                   | N-Term(iTRAQ4plex)                                   | 1715.98137 | 48 | 69  |      | 3.84 | Expt2 |
| AVTDEEPLIFANR          | 6  | 124494256                                                                                                                                   | N-Term(iTRAQ4plex)                                   | 1765.93181 | 48 | 67  |      | 3.85 | Expt2 |
| DCPVPLPGDGLLVR         | 3  | 31559926                                                                                                                                    | N-Term(iTRAQ4plex), C2(Methylthio)                   | 1755.89214 | 48 | 66  |      | 3.61 | Expt2 |
| LLPOVMYLDGYDR          | 11 | 40254600                                                                                                                                    | N-Term(iTRAQ4plex), M6(Oxidation)                    | 1742.89458 | 48 | 66  |      | 3.53 | Expt2 |
| WILENDPTELDLR          | 4  | 56699423                                                                                                                                    | N-Term(iTRAQ4plex)                                   | 1757.92436 | 48 | 65  |      | 4.00 | Expt2 |
| CECFGLAVLGDGR          | 10 | 118197277                                                                                                                                   | N-Term(iTRAQ4plex), C1(Methylthio), C3(Methylthio)   | 1672.74700 | 48 | 64  |      | 3.50 | Expt2 |
| GVDLVLNLSLAEEK         | 7  | 93102409                                                                                                                                    | N-Term(iTRAQ4plex), K13(iTRAQ4plex)                  | 1674.95806 | 48 | 60  |      | 3.93 | Expt2 |

|                         |    |                                                                                       |                                                        |            |    |     |      |       |
|-------------------------|----|---------------------------------------------------------------------------------------|--------------------------------------------------------|------------|----|-----|------|-------|
| ELPTAFDYVEFTR           | 10 | 115496850                                                                             | N-Term(I TRAQ4plex)                                    | 1731.87554 | 48 | 50  | 4.71 | Expt2 |
| GAOAAIVVYDITNOETFAR     | 9  | 28916687;149249575                                                                    | N-Term(I TRAQ4plex)                                    | 2211.15671 | 48 | 82  | 5.61 | Expt2 |
| GAEAAVVTGGGVPVQGSK      | 6  | 149252935;113205059                                                                   | N-Term(I TRAQ4plex), K19(I TRAQ4plex)                  | 1984.06633 | 48 | 78  | 4.34 | Expt2 |
| GLLGNNIPLQR             | 3  | 119508441                                                                             | N-Term(I TRAQ4plex), C5(Methylthio)                    | 1486.83623 | 48 | 43  | 3.82 | Expt2 |
| YIOPWESEFIDSOR          | 2  | 115583687                                                                             | N-Term(I TRAQ4plex)                                    | 1941.95285 | 48 |     | 3.69 | Expt2 |
| GSGIGSNEAP              | 14 | 160333881                                                                             | N-Term(I TRAQ4plex)                                    | 1032.51055 | 48 | 73  |      | Expt2 |
| DVSELTGFPMLGGR          | 10 | 149234067                                                                             | N-Term(I TRAQ4plex)                                    | 1751.88066 | 48 | 91  | 4.56 | Expt2 |
| EFSAPSTPTGTLFAGGDAK     | 4  | 61743961                                                                              | N-Term(I TRAQ4plex), K20(I TRAQ4plex)                  | 2271.14336 | 48 | 75  | 3.93 | Expt2 |
| QVWNIPSFIVR             | 16 | 33504483                                                                              | N-Term(I TRAQ4plex)                                    | 1415.84941 | 48 | 46  | 4.21 | Expt2 |
| AAPTLEYR                | 10 | 27754065                                                                              | N-Term(I TRAQ4plex)                                    | 1211.65764 | 48 | 59  | 3.54 | Expt2 |
| DLEALMLDR               | 3  | 227330633                                                                             | N-Term(I TRAQ4plex)                                    | 1219.64849 | 48 | 43  | 3.81 | Expt2 |
| VGLLEALLPGOPEAVAR       | 11 | 6680117                                                                               | N-Term(I TRAQ4plex)                                    | 1877.10503 | 48 | 89  | 4.18 | Expt2 |
| MWVFSNLR                | 1  | 12963685                                                                              | N-Term(I TRAQ4plex)                                    | 1196.63725 | 48 |     |      | Expt2 |
| VMILITDGK               | 13 | 111074529                                                                             | N-Term(I TRAQ4plex), K9(I TRAQ4plex)                   | 1277.77544 | 48 | 61  | 3.75 | Expt2 |
| LGLVGVNLSLDGVK          | 8  | 29293809                                                                              | N-Term(I TRAQ4plex), K14(I TRAQ4plex)                  | 1672.03276 | 48 | 87  | 4.29 | Expt2 |
| LNPOEYLTSTACR           | 3  | 166235123;37718972;166235125;112421097                                                | N-Term(I TRAQ4plex), C12(Methylthio)                   | 1685.81450 | 48 | 61  | 3.98 | Expt2 |
| GLEDQNLWQVGR            | 3  | 170014682;170014686                                                                   | N-Term(I TRAQ4plex)                                    | 1558.81291 | 48 | 50  | 4.82 | Expt2 |
| DGGSTTAGNSSQVSDGAAVLLAR | 3  | 18700004;22122797                                                                     | N-Term(I TRAQ4plex)                                    | 2349.17923 | 48 | 79  | 5.56 | Expt2 |
| GPELLTMWFGESEANVR       | 7  | 225543319;94408011                                                                    | N-Term(I TRAQ4plex), M7(Oxidation)                     | 2096.03080 | 48 | 42  | 4.09 | Expt2 |
| VLLQEEGAR               | 10 | 82950147;82950149;149264086                                                           | N-Term(I TRAQ4plex)                                    | 1158.66216 | 48 | 56  |      | Expt2 |
| EMVELPLR                | 7  | 225543319;94408011                                                                    | N-Term(I TRAQ4plex)                                    | 1130.63750 | 48 | 39  |      | Expt2 |
| TVLGVPEVLLGILPGAGGTQR   | 4  | 33859811                                                                              | N-Term(I TRAQ4plex)                                    | 2191.29911 | 48 | 51  | 1.22 | 4.41  |
| AQLFALTGVOPAR           | 3  | 84452155;31560313                                                                     | N-Term(I TRAQ4plex)                                    | 1515.87761 | 48 | 62  | 4.09 | Expt2 |
| EAEVQIDQVLSESEQEAVMDR   | 6  | 226423935                                                                             | N-Term(I TRAQ4plex), M20(Oxidation)                    | 2666.26554 | 48 | 92  | 5.69 | Expt2 |
| IPVDYNNILTVLK           | 5  | 13928670                                                                              | N-Term(I TRAQ4plex), K14(I TRAQ4plex)                  | 1891.11911 | 48 | 54  | 3.88 | Expt2 |
| EAASDYLELDTIK           | 10 | 6755863                                                                               | N-Term(I TRAQ4plex), K13(I TRAQ4plex)                  | 1813.93620 | 48 | 109 | 5.26 | Expt2 |
| DFPELTMEVDGK            | 3  | 31560731                                                                              | N-Term(I TRAQ4plex), K12(I TRAQ4plex)                  | 1668.84282 | 48 | 82  | 3.89 | Expt2 |
| EIDQEAIVEVSQLR          | 3  | 13385168                                                                              | N-Term(I TRAQ4plex)                                    | 1730.90605 | 48 | 69  | 4.26 | Expt2 |
| YIOELWR                 | 1  | 13385036;149233830;82896911;149254416;149262861;149266587;149267527;82984224;82993291 | N-Term(I TRAQ4plex)                                    | 1151.63249 | 48 |     |      | Expt2 |
| ENAPAIIFEIDAIATK        | 3  | 124248577                                                                             | N-Term(I TRAQ4plex), K18(I TRAQ4plex)                  | 2232.24314 | 48 | 58  | 5.69 | Expt2 |
| FSPAGPILSIR             | 19 | 149271821;31560656;255652857                                                          | N-Term(I TRAQ4plex)                                    | 1301.77287 | 48 | 54  | 4.19 | Expt2 |
| LELVEQER                | 2  | 112421039                                                                             | N-Term(I TRAQ4plex)                                    | 1159.64556 | 48 | 38  |      | Expt2 |
| GPEVDVDVGDIDIECPEGK     | 4  | 61743961                                                                              | N-Term(I TRAQ4plex), C15(Methylthio), K19(I TRAQ4plex) | 2320.10245 | 48 | 65  | 4.46 | Expt2 |
| LDGLCIPLR               | 2  | 124494256                                                                             | N-Term(I TRAQ4plex), C5(Methylthio)                    | 1189.65618 | 48 | 34  |      | Expt2 |
| GAEADQIHLYLK            | 3  | 126012517                                                                             | N-Term(I TRAQ4plex), K12(I TRAQ4plex)                  | 1637.90141 | 48 | 70  | 4.39 | Expt2 |
| LIEVDDER                | 12 | 94367038;82885362;149265796;82955311;149271678                                        | N-Term(I TRAQ4plex)                                    | 1132.59966 | 48 | 43  | 3.46 | Expt2 |
| DMAGLYEEIWK             | 4  | 33469047                                                                              | N-Term(I TRAQ4plex), K11(I TRAQ4plex)                  | 1642.84055 | 48 | 52  | 3.99 | Expt2 |
| AINTFPYR                | 8  | 111074529                                                                             | N-Term(I TRAQ4plex)                                    | 1125.62004 | 47 | 39  |      | Expt2 |
| YNILGNTIMDK             | 11 | 160333923                                                                             | N-Term(I TRAQ4plex), K12(I TRAQ4plex)                  | 1670.90764 | 47 | 100 | 4.23 | Expt2 |
| IQQEIHAVQNPLVSR         | 5  | 149270309                                                                             | N-Term(I TRAQ4plex)                                    | 1868.03801 | 47 | 88  | 4.47 | Expt2 |
| SLCPVSWVSAWDDR          | 6  | 13385090                                                                              | N-Term(I TRAQ4plex), C3(Methylthio)                    | 1810.84038 | 47 | 88  | 3.90 | Expt2 |
| FITEPEGATEMGLR          | 5  | 149251314;189458807                                                                   | N-Term(I TRAQ4plex)                                    | 1795.90740 | 47 | 86  | 3.69 | Expt2 |
| IATVGYLPTQDVLRL         | 4  | 6754004                                                                               | N-Term(I TRAQ4plex)                                    | 1818.03093 | 47 | 57  | 4.22 | Expt2 |
| NIAFFSTNCVEGTAR         | 3  | 21450277                                                                              | N-Term(I TRAQ4plex), C9(Methylthio)                    | 1819.86455 | 47 | 55  |      | Expt2 |
| GTEDFIVESLDASFR         | 5  | 82950283;165377206                                                                    | N-Term(I TRAQ4plex)                                    | 1829.90447 | 47 | 54  | 4.02 | Expt2 |
| GTDIMYGTGLDCWR          | 2  | 22094075                                                                              | N-Term(I TRAQ4plex), C12(Methylthio)                   | 1821.81157 | 47 | 54  |      | Expt2 |
| TVIPGMPTVIPGLTR         | 4  | 160707945;160707947                                                                   | N-Term(I TRAQ4plex)                                    | 1793.05278 | 47 | 43  |      | Expt2 |
| DSNVCYGFR               | 27 | 148277039                                                                             | N-Term(I TRAQ4plex), C5(Methylthio)                    | 1250.54180 | 47 | 36  | 3.92 | Expt2 |
| TYGICGAIK               | 4  | 21536222                                                                              | N-Term(I TRAQ4plex), C5(Methylthio)                    | 1143.57500 | 47 | 31  |      | Expt2 |
| SLEEANAELNK             | 4  | 149262636;118130981                                                                   | N-Term(I TRAQ4plex), K12(I TRAQ4plex)                  | 1634.85367 | 47 | 49  | 3.65 | Expt2 |
| EFNEDGALAVLQFK          | 5  | 114145493;29788787                                                                    | N-Term(I TRAQ4plex), K15(I TRAQ4plex)                  | 1997.06548 | 47 | 98  | 4.04 | Expt2 |
| LFVGGLDWSTTQETLR        | 6  | 169790818;169790823;169790820                                                         | N-Term(I TRAQ4plex)                                    | 1967.03874 | 47 | 73  | 4.43 | Expt2 |
| VGVDPLIIPTDYWK          | 2  | 42476274                                                                              | N-Term(I TRAQ4plex), K14(I TRAQ4plex)                  | 1904.07768 | 47 | 37  |      | Expt2 |
| AVTAADMEAR              | 3  | 6680846                                                                               | N-Term(I TRAQ4plex)                                    | 1178.59978 | 47 | 48  | 3.65 | Expt2 |

|                    |    |                                                                                                                                                       |                                                                     |            |    |     |      |       |       |
|--------------------|----|-------------------------------------------------------------------------------------------------------------------------------------------------------|---------------------------------------------------------------------|------------|----|-----|------|-------|-------|
| FELSGIPPAPR        | 19 | 124339829;124339826                                                                                                                                   | N-Term(iTRAQ4plex)                                                  | 1327.74687 | 47 | 52  | 4.21 | Expt2 |       |
| GFGVSVFER          | 14 | 6754972;31560656;255652857                                                                                                                            | N-Term(iTRAQ4plex)                                                  | 1189.61382 | 47 | 51  | 3.77 | Expt2 |       |
| IPDQLVILDMK        | 3  | 21312062                                                                                                                                              | N-Term(iTRAQ4plex), M10(Oxidation), K11(iTRAQ4plex)                 | 1588.92258 | 47 | 48  | 4.35 | Expt2 |       |
| GAEMETV1PVDVMR     | 4  | 55741460                                                                                                                                              | N-Term(iTRAQ4plex), M5(Oxidation)                                   | 1835.90679 | 47 | 67  | 3.45 | Expt2 |       |
| QIFLGGVDR          | 9  | 148747424                                                                                                                                             | N-Term(iTRAQ4plex)                                                  | 1148.65386 | 47 | 40  |      | Expt2 |       |
| LFFLOVK            | 5  | 149266483;157277952;70778915;157277948                                                                                                                | N-Term(iTRAQ4plex), K7(iTRAQ4plex)                                  | 1182.75920 | 47 | 42  |      | Expt2 |       |
| IWSVLESFR          | 4  | 33469047                                                                                                                                              | N-Term(iTRAQ4plex)                                                  | 1230.69658 | 47 | 41  | 3.52 | Expt2 |       |
| FDTGNLCMVTGGANLGR  | 3  | 6677805                                                                                                                                               | N-Term(iTRAQ4plex), C7(Methylthio), M8(Oxidation)                   | 1931.89377 | 47 | 52  | 4.67 | Expt2 |       |
| GSTAPVGGSFPTITPR   | 1  | 58037267                                                                                                                                              | N-Term(iTRAQ4plex)                                                  | 1745.93181 | 47 |     |      | Expt2 |       |
| IPDEEDQEDPYLNDR    | 10 | 168693628                                                                                                                                             | N-Term(iTRAQ4plex)                                                  | 1991.89531 | 47 | 62  | 4.29 | Expt2 |       |
| NVVTIFSAFNVCYR     | 4  | 8394024;149258657;9506983                                                                                                                             | N-Term(iTRAQ4plex), C12(Methylthio)                                 | 1836.89165 | 47 | 61  |      | Expt2 |       |
| GAAAMIPGPTVATEIR   | 6  | 7305029;54873604                                                                                                                                      | N-Term(iTRAQ4plex)                                                  | 1826.99785 | 47 | 55  | 3.79 | Expt2 |       |
| VLTEIIASR          | 6  | 6753060                                                                                                                                               | N-Term(iTRAQ4plex)                                                  | 1145.70354 | 47 | 44  |      | Expt2 |       |
| GAVGVDPDTPTR       | 2  | 110735428;110735426                                                                                                                                   | N-Term(iTRAQ4plex)                                                  | 1213.66631 | 47 | 41  |      | Expt2 |       |
| EISDGDVVISGNNR     | 3  | 46560582;6681283                                                                                                                                      | N-Term(iTRAQ4plex)                                                  | 1518.79009 | 47 | 64  | 4.15 | Expt2 |       |
| DCDLQEDACYNCGR     | 3  | 157909784                                                                                                                                             | N-Term(iTRAQ4plex), C2(Methylthio), C9(Methylthio), C12(Methylthio) | 1886.63970 | 47 | 103 | 4.71 | Expt2 |       |
| CLTTIVK            | 3  | 124517663                                                                                                                                             | N-Term(iTRAQ4plex), C1(Methylthio), K7(iTRAQ4plex)                  | 1111.64360 | 47 | 48  |      | Expt2 |       |
| GCLTEQYPEVVR       | 3  | 33859660                                                                                                                                              | N-Term(iTRAQ4plex), C2(Methylthio)                                  | 1684.81706 | 47 | 76  | 4.67 | Expt2 |       |
| AILAELTGR          | 4  | 6679261                                                                                                                                               | N-Term(iTRAQ4plex)                                                  | 1087.66045 | 47 | 44  |      | Expt2 |       |
| GDPDEQVGVQAWAR     | 3  | 170014682;170014686                                                                                                                                   | N-Term(iTRAQ4plex)                                                  | 1671.82231 | 47 | 92  | 4.46 | Expt2 |       |
| LLCGLLSDR          | 15 | 149256684;6754696                                                                                                                                     | N-Term(iTRAQ4plex), C3(Methylthio)                                  | 1179.63567 | 47 | 51  |      | Expt2 |       |
| AGLSPGFVDMGAEPGR   | 3  | 46402175                                                                                                                                              | N-Term(iTRAQ4plex)                                                  | 1704.85137 | 47 | 51  | 3.64 | Expt2 |       |
| DFTVASPAEFVTR      | 3  | 157042798;125656173                                                                                                                                   | N-Term(iTRAQ4plex)                                                  | 1583.82402 | 47 | 37  | 3.80 | Expt2 |       |
| EGLLAIFK           | 6  | 6671684;28395018                                                                                                                                      | N-Term(iTRAQ4plex), K8(iTRAQ4plex)                                  | 1178.73992 | 47 | 57  | 3.55 | Expt2 |       |
| DVPVVAILGSGGGFR    | 2  | 6679369                                                                                                                                               | N-Term(iTRAQ4plex)                                                  | 1587.89774 | 47 | 68  |      | Expt2 |       |
| YLGAEVMSQSVGNMR    | 2  | 20330802                                                                                                                                              | N-Term(iTRAQ4plex), M7(Oxidation), M13(Oxidation)                   | 1794.82695 | 47 | 53  |      | Expt2 |       |
| AAGCCCEMR          | 12 | 88196773                                                                                                                                              | N-Term(iTRAQ4plex), C4(Methylthio), C5(Methylthio)                  | 1205.43559 | 47 | 54  | 3.54 | Expt2 |       |
| EDVLSFIQSHNPLGP    | 2  | 21311939                                                                                                                                              | N-Term(iTRAQ4plex)                                                  | 1796.92911 | 47 | 43  |      | Expt2 |       |
| LOEELAASDR         | 8  | 29336026                                                                                                                                              | N-Term(iTRAQ4plex)                                                  | 1275.66741 | 47 | 56  | 3.93 | Expt2 |       |
| GLAVFISDIR         | 4  | 6671561;116256510;163644277                                                                                                                           | N-Term(iTRAQ4plex)                                                  | 1234.73088 | 47 | 54  |      | Expt2 |       |
| EIDGGLETLR         | 5  | 149257125;149257127;38142460                                                                                                                          | N-Term(iTRAQ4plex)                                                  | 1246.67571 | 47 | 50  |      | Expt2 |       |
| QLLLTADDR          | 7  | 6671539                                                                                                                                               | N-Term(iTRAQ4plex)                                                  | 1188.67375 | 47 | 50  |      | Expt2 |       |
| GYPTLLWFR          | 6  | 83921612                                                                                                                                              | N-Term(iTRAQ4plex)                                                  | 1296.72331 | 47 | 35  | 3.58 | Expt2 |       |
| AMTTGAIAMSLTILYSR  | 5  | 7242197                                                                                                                                               | N-Term(iTRAQ4plex), M2(Oxidation)                                   | 2031.07523 | 47 | 60  | 4.31 | Expt2 |       |
| EGLPPDQQR          | 20 | 9845265;149249766;149250554;82894992;149254469;149254584;94378076;82902501;94385661;149259705;149259811;149260017;149262307;94400086;82996161;6755919 | N-Term(iTRAQ4plex)                                                  | 1183.62358 | 47 | 51  |      | Expt2 |       |
| GDTDOASNILASFGLSAR | 9  | 25141233                                                                                                                                              | N-Term(iTRAQ4plex)                                                  | 1966.99687 | 47 | 57  | 4.30 | Expt2 |       |
| DYGEVGLNLCVYIPK    | 4  | 73088940;71067128                                                                                                                                     | N-Term(iTRAQ4plex), C10(Methylthio), K15(iTRAQ4plex)                | 1976.93425 | 47 | 54  | 1.23 | 3.61  | Expt2 |
| YTTPEDATPEPEDPR    | 5  | 47271396;117959921;117959928;117959930                                                                                                                | N-Term(iTRAQ4plex)                                                  | 1918.88042 | 47 | 46  | 3.82 | Expt2 |       |
| AQYEAQAQNR         | 36 | 122425580;118130981                                                                                                                                   | N-Term(iTRAQ4plex), M6(Oxidation), O9(Deamidated)                   | 1471.66387 | 47 | 56  | 3.65 | Expt2 |       |
| VFAVITDGR          | 83 | 22203747                                                                                                                                              | N-Term(iTRAQ4plex)                                                  | 1220.71013 | 47 | 55  |      | Expt2 |       |
| ALEYLQOEVEER       | 3  | 8394239                                                                                                                                               | N-Term(iTRAQ4plex)                                                  | 1650.84587 | 47 | 57  | 4.30 | Expt2 |       |
| NILDNCPFR          | 23 | 6755781                                                                                                                                               | N-Term(iTRAQ4plex), C6(Methylthio)                                  | 1134.55303 | 47 | 40  |      | Expt2 |       |
| VAVVNOIAR          | 7  | 117938332;117938334                                                                                                                                   | N-Term(iTRAQ4plex)                                                  | 1113.68743 | 47 | 40  |      | Expt2 |       |
| DVLMISLTPK         | 2  | 149263750                                                                                                                                             | N-Term(iTRAQ4plex), M4(Oxidation), K10(iTRAQ4plex)                  | 1420.84026 | 47 | 67  |      | Expt2 |       |
| GDDGPPGMTGFFPGAAGR | 5  | 111120329                                                                                                                                             | N-Term(iTRAQ4plex)                                                  | 1645.77202 | 47 | 55  |      | Expt2 |       |
| IDSLLSDR           | 3  | 149266012;214010170                                                                                                                                   | N-Term(iTRAQ4plex)                                                  | 1191.63384 | 47 | 36  | 3.44 | Expt2 |       |
| OMEQISOFLQAAER     | 7  | 30519911                                                                                                                                              | N-Term(iTRAQ4plex)                                                  | 1822.92295 | 47 | 70  | 5.16 | Expt2 |       |
| ALYQAEAFADFQQPR    | 5  | 130503301                                                                                                                                             | N-Term(iTRAQ4plex)                                                  | 1999.99875 | 47 | 56  | 4.49 | Expt2 |       |
| DASVGVFFR          | 4  | 112293264                                                                                                                                             | N-Term(iTRAQ4plex)                                                  | 1141.61357 | 47 | 34  | 3.52 | Expt2 |       |
| TMTGLDTPVLMVIK     | 6  | 194328704;194328702;194328706;18700026;194328708                                                                                                      | N-Term(iTRAQ4plex), K14(iTRAQ4plex)                                 | 1807.03520 | 47 | 68  | 4.24 | Expt2 |       |
| EELQLLOEQGSYVGEVVR | 3  | 7110703                                                                                                                                               | N-Term(iTRAQ4plex)                                                  | 2220.16715 | 47 | 60  | 4.77 | Expt2 |       |

|                             |    |                                                                     |                                                                                                        |            |    |    |      |      |       |
|-----------------------------|----|---------------------------------------------------------------------|--------------------------------------------------------------------------------------------------------|------------|----|----|------|------|-------|
| LTTPTYGDLNHLVSATMSGVTTCLR   | 6  | 33859488;31981939;7106439;2216538<br>4:21746161;149253488;149253527 | N-Term(iTRAQ4plex), M17(Oxidation), C23(Methylthio)                                                    | 2857.40384 | 47 | 49 |      | 4.52 | Expt2 |
| DCPOECDPPNFPTAMYCDNR        | 16 | 10946680                                                            | N-Term(iTRAQ4plex), C2(Methylthio), C6(Methylthio), C8(Methylthio),<br>M16(Oxidation), C18(Methylthio) | 2762.94815 | 47 | 62 |      | 5.92 | Expt2 |
| NLOPQSEYTVTLVAVK            | 5  | 46849812                                                            | N-Term(iTRAQ4plex), K16(iTRAQ4plex)                                                                    | 2007.13115 | 47 | 58 | 1.45 | 3.71 | Expt2 |
| SLFIPSESSYDR                | 2  | 121949760                                                           | N-Term(iTRAQ4plex)                                                                                     | 1544.77519 | 47 |    |      | 3.46 | Expt2 |
| DNLEWLAR                    | 3  | 74315975                                                            | N-Term(iTRAQ4plex)                                                                                     | 1160.62004 | 47 | 41 |      |      | Expt2 |
| ELIFEETAR                   | 4  | 6754632                                                             | N-Term(iTRAQ4plex)                                                                                     | 1251.67143 | 46 | 59 |      |      | Expt2 |
| ELIFOETAR                   | 7  | 21489933                                                            | N-Term(iTRAQ4plex), Q5(Deamidated)                                                                     | 1251.67143 | 46 | 59 |      |      | Expt2 |
| VPPPLAPR                    | 7  | 237820699                                                           | N-Term(iTRAQ4plex)                                                                                     | 1087.67558 | 46 | 32 |      |      | Expt2 |
| VPPPPPIAR                   | 10 | 8393544                                                             | N-Term(iTRAQ4plex)                                                                                     | 1087.67558 | 46 | 32 |      |      | Expt2 |
| TDMDNQIVVSDYAQMDR           | 3  | 6753322                                                             | N-Term(iTRAQ4plex)                                                                                     | 2144.97173 | 46 | 68 |      | 4.33 | Expt2 |
| VPEGVAGAPNEAALLALIER        | 3  | 188497698                                                           | N-Term(iTRAQ4plex)                                                                                     | 2134.20426 | 46 | 64 |      | 4.32 | Expt2 |
| TIDWVSFVEMPQNOK             | 6  | 149266312;21313679                                                  | N-Term(iTRAQ4plex), K16(iTRAQ4plex)                                                                    | 2209.16288 | 46 | 60 |      | 4.89 | Expt2 |
| DOGQOESLVR                  | 7  | 112421039                                                           | N-Term(iTRAQ4plex)                                                                                     | 1272.66985 | 46 | 58 |      | 3.67 | Expt2 |
| TLSLDEVYLIDSGAQYK           | 2  | 42476274                                                            | N-Term(iTRAQ4plex), K17(iTRAQ4plex)                                                                    | 2203.17752 | 46 |    |      | 3.89 | Expt2 |
| ELALPGLTQSR                 | 12 | 19526826;164518904                                                  | N-Term(iTRAQ4plex)                                                                                     | 1457.80742 | 46 | 53 |      | 3.76 | Expt2 |
| SPSWEPFR                    | 9  | 158937312                                                           | N-Term(iTRAQ4plex)                                                                                     | 1149.58098 | 46 | 43 |      |      | Expt2 |
| VPNYQALLR                   | 15 | 6753484                                                             | N-Term(iTRAQ4plex)                                                                                     | 1217.71160 | 46 | 41 |      |      | Expt2 |
| LSEGLEFR                    | 4  | 70608131                                                            | N-Term(iTRAQ4plex)                                                                                     | 1294.67705 | 46 | 45 |      | 3.66 | Expt2 |
| LTELEATVR                   | 1  | 28076935                                                            | N-Term(iTRAQ4plex)                                                                                     | 1175.67607 | 46 |    |      |      | Expt2 |
| GSFSEGINFLR                 | 8  | 149262992;58037267                                                  | N-Term(iTRAQ4plex)                                                                                     | 1627.82219 | 46 | 57 |      | 4.98 | Expt2 |
| TTQVPQYILDDFIQNDR           | 11 | 150456419                                                           | N-Term(iTRAQ4plex)                                                                                     | 2210.12894 | 46 | 56 |      | 3.86 | Expt2 |
| LNVAPVSDIEIK                | 12 | 227500281                                                           | N-Term(iTRAQ4plex), K13(iTRAQ4plex)                                                                    | 1699.03264 | 46 | 90 |      | 4.19 | Expt2 |
| EEEEFNTGPLSVLTQSVK          | 3  | 58037145                                                            | N-Term(iTRAQ4plex), K18(iTRAQ4plex)                                                                    | 2295.20542 | 46 | 72 |      | 4.27 | Expt2 |
| ISLPVILMDETLK               | 3  | 6806903;158635979                                                   | N-Term(iTRAQ4plex), M8(Oxidation), K13(iTRAQ4plex)                                                     | 1776.04923 | 46 | 39 |      | 3.50 | Expt2 |
| LVFDGLR                     | 9  | 82950147;82950149;149264086                                         | N-Term(iTRAQ4plex)                                                                                     | 963.57488  | 46 | 38 |      |      | Expt2 |
| TVLOIDNSVASALEGINR          | 7  | 13385500                                                            | N-Term(iTRAQ4plex)                                                                                     | 2044.12314 | 46 | 70 |      | 4.57 | Expt2 |
| VTLSPSTLOTGTGTLK            | 8  | 68226731                                                            | N-Term(iTRAQ4plex), K17(iTRAQ4plex)                                                                    | 2039.16301 | 46 | 68 |      | 4.22 | Expt2 |
| EATPGDIAPYTIPEEDR           | 3  | 74229034                                                            | N-Term(iTRAQ4plex)                                                                                     | 2017.98955 | 46 | 53 |      | 4.33 | Expt2 |
| NGVOAMVEFSDVQSAQR           | 5  | 183980004                                                           | N-Term(iTRAQ4plex), Q4(Deamidated)                                                                     | 2010.97136 | 46 | 46 |      | 3.88 | Expt2 |
| IYWNDGLDQYR                 | 2  | 6754982                                                             | N-Term(iTRAQ4plex)                                                                                     | 1586.77336 | 46 | 36 |      |      | Expt2 |
| GSDFDCEL                    | 8  | 13384620;149264394                                                  | N-Term(iTRAQ4plex), C6(Methylthio)                                                                     | 1231.52117 | 46 | 43 |      |      | Expt2 |
| GFGFVDFNSEEDAK              | 4  | 84875537                                                            | N-Term(iTRAQ4plex), K14(iTRAQ4plex)                                                                    | 1849.89238 | 46 | 71 |      | 4.35 | Expt2 |
| FSQQLDGR                    | 13 | 148277039                                                           | N-Term(iTRAQ4plex)                                                                                     | 1094.57019 | 46 | 47 |      | 3.54 | Expt2 |
| GAGTDEFTLNR                 | 4  | 160707925                                                           | N-Term(iTRAQ4plex)                                                                                     | 1324.66448 | 46 | 53 |      | 4.20 | Expt2 |
| LGELPSWIMMR                 | 3  | 10181184                                                            | N-Term(iTRAQ4plex)                                                                                     | 1476.78435 | 46 | 52 |      | 3.91 | Expt2 |
| VQGMVISGVDR                 | 2  | 13385312                                                            | N-Term(iTRAQ4plex)                                                                                     | 1304.71172 | 46 | 39 |      |      | Expt2 |
| TFSHELSDFGLESTTGEVPPVAIR    | 7  | 112293264                                                           | N-Term(iTRAQ4plex)                                                                                     | 2735.40763 | 46 | 82 |      | 5.46 | Expt2 |
| SFEVEIEPPNSTPPR             | 1  | 164698481;164698479                                                 | N-Term(iTRAQ4plex)                                                                                     | 1971.98380 | 46 |    |      |      | Expt2 |
| SLQQLAEER                   | 5  | 115496850                                                           | N-Term(iTRAQ4plex)                                                                                     | 1217.66045 | 46 | 42 |      | 3.63 | Expt2 |
| NALPTPSDDPTALMTDPK          | 5  | 84871986                                                            | N-Term(iTRAQ4plex), K18(iTRAQ4plex)                                                                    | 2172.11203 | 46 | 41 |      | 4.46 | Expt2 |
| TLEDEEELFK                  | 3  | 153792001                                                           | N-Term(iTRAQ4plex), K11(iTRAQ4plex)                                                                    | 1669.84551 | 46 | 77 |      | 4.66 | Expt2 |
| EVCGFAPYER                  | 12 | 149262233;149249185;82894566;8289<br>8629;94385943;149262863        | N-Term(iTRAQ4plex), C3(Methylthio)                                                                     | 1360.61479 | 46 | 27 |      | 3.90 | Expt2 |
| DLTDYLMK                    | 12 | 6671509;6752954;6671507;157823889;<br>14192922;33563240;30425250    | N-Term(iTRAQ4plex), M7(Oxidation), K8(iTRAQ4plex)                                                      | 1302.68157 | 46 | 43 |      |      | Expt2 |
| VTTMDAELEFAIQPNTTGK         | 3  | 149266483;157277952;70778915;1572<br>77948                          | N-Term(iTRAQ4plex), M4(Oxidation), K19(iTRAQ4plex)                                                     | 2370.21769 | 46 | 53 |      | 4.46 | Expt2 |
| IYQIYEGTAQIQR               | 5  | 6680618                                                             | N-Term(iTRAQ4plex)                                                                                     | 1726.92583 | 46 | 52 |      | 4.00 | Expt2 |
| ELGIWEPLAVK                 | 6  | 6753320                                                             | N-Term(iTRAQ4plex), K11(iTRAQ4plex)                                                                    | 1542.91826 | 46 | 61 |      | 4.15 | Expt2 |
| IILQGSPPVQMAEDAVIDGER       | 3  | 126518317                                                           | N-Term(iTRAQ4plex)                                                                                     | 2271.18235 | 46 | 93 |      | 5.51 | Expt2 |
| GVVGPAAIAAPGGGGAGPPAVGGGGGR | 3  | 133504509                                                           | N-Term(iTRAQ4plex)                                                                                     | 2382.28360 | 46 | 62 |      | 4.31 | Expt2 |
| ADHOPLTEASYVNLPTIALCNTDSPLR | 3  | 149251929;63514363;82905443;51770<br>420;82994829;149270876         | N-Term(iTRAQ4plex), C20(Methylthio)                                                                    | 3129.55405 | 46 | 59 |      | 3.90 | Expt2 |
| SEIIPMFSNLSASDEQSDVR        | 6  | 8394027                                                             | N-Term(iTRAQ4plex), M6(Oxidation)                                                                      | 2298.11405 | 46 | 52 |      | 4.08 | Expt2 |
| SGGMSNELNNIISR              | 4  | 29293809                                                            | N-Term(iTRAQ4plex)                                                                                     | 1635.82829 | 46 | 79 |      | 4.85 | Expt2 |
| ILOQDWSDLMPDPAGVR           | 11 | 111185907                                                           | N-Term(iTRAQ4plex)                                                                                     | 2085.06255 | 46 | 58 | 1.42 | 4.55 | Expt2 |



|                               |    |                                        |                                                     |            |    |     |      |       |       |
|-------------------------------|----|----------------------------------------|-----------------------------------------------------|------------|----|-----|------|-------|-------|
| FGFYEVFK                      | 2  | 149258501:19526818                     | N-Term(iTRAQ4plex), K8(iTRAQ4plex)                  | 1324.72588 | 46 | 66  |      |       | Expt2 |
| SIPAYLAETLYYAMK               | 7  | 6753060                                | N-Term(iTRAQ4plex), K15(iTRAQ4plex)                 | 2022.08677 | 46 | 43  |      | 6.37  | Expt2 |
| NTDEMVELR                     | 8  | 13384620                               | N-Term(iTRAQ4plex)                                  | 1250.61968 | 46 | 55  |      | 3.77  | Expt2 |
| VTQECSEYR                     | 6  | 111185907                              | N-Term(iTRAQ4plex), C5(Methylthio)                  | 1304.56951 | 46 | 37  |      | 3.45  | Expt2 |
| YDAFGEDSSSANGIENR             | 7  | 120407050                              | N-Term(iTRAQ4plex)                                  | 1992.87590 | 46 | 105 | 1.14 | 4.89  | Expt2 |
| VAGEGCYVLOISLTK               | 5  | 148277039                              | N-Term(iTRAQ4plex), C6(Methylthio), K14(iTRAQ4plex) | 1801.95024 | 46 | 69  |      | 3.51  | Expt2 |
| LEAELGNMQLGVDFK               | 4  | 114145561                              | N-Term(iTRAQ4plex), K16(iTRAQ4plex)                 | 2081.09562 | 46 | 75  |      | 3.83  | Expt2 |
| LIVALMPPYSYEAKE               | 7  | 149265291:22165408                     | N-Term(iTRAQ4plex), M6(Oxidation), K15(iTRAQ4plex)  | 2062.11919 | 46 | 65  |      | 3.74  | Expt2 |
| ADAGGEDAILQTR                 | 3  | 13385890                               | N-Term(iTRAQ4plex)                                  | 1460.74834 | 46 | 54  |      | 4.33  | Expt2 |
| IAATILTSPDLR                  | 4  | 6754036                                | N-Term(iTRAQ4plex)                                  | 1414.84087 | 46 | 55  |      | 4.65  | Expt2 |
| DAGMQLQGYR                    | 7  | 6754036                                | N-Term(iTRAQ4plex)                                  | 1282.63274 | 46 | 46  |      | 3.84  | Expt2 |
| FSFPDVTIGSER                  | 3  | 23346525                               | N-Term(iTRAQ4plex)                                  | 1595.82256 | 46 | 39  |      | 3.78  | Expt2 |
| LYPSAEVPDLR                   | 10 | 6753428                                | N-Term(iTRAQ4plex)                                  | 1564.81377 | 46 | 46  |      | 3.71  | Expt2 |
| MDLLEEQVAGAVR                 | 3  | 19527130                               | N-Term(iTRAQ4plex)                                  | 1574.83037 | 46 | 39  |      | 4.31  | Expt2 |
| NPPQSTTPLPTILOPK              | 5  | 161484644                              | N-Term(iTRAQ4plex), K18(iTRAQ4plex)                 | 2218.26982 | 46 | 34  |      | 3.85  | Expt2 |
| TLVGPDANTIR                   | 8  | 111185907                              | N-Term(iTRAQ4plex)                                  | 1300.73638 | 46 | 48  |      | 3.55  | Expt2 |
| FNDEHIPDSPLYLVPVIAPSDAR       | 4  | 145966915                              | N-Term(iTRAQ4plex)                                  | 2711.35233 | 46 | 44  |      | 5.74  | Expt2 |
| EFSIDVGYER                    | 5  | 23956222                               | N-Term(iTRAQ4plex)                                  | 1358.67424 | 46 | 43  |      | 3.56  | Expt2 |
| TPVLFVDVYEIK                  | 6  | 160707921                              | N-Term(iTRAQ4plex), K11(iTRAQ4plex)                 | 1611.92693 | 46 | 95  |      | 4.05  | Expt2 |
| EELSPASSNAVYDFFIGR            | 6  | 229608895                              | N-Term(iTRAQ4plex)                                  | 2203.08670 | 46 | 69  |      | 4.79  | Expt2 |
| CAWGOQPDLAANEQQLLR            | 5  | 6755210                                | N-Term(iTRAQ4plex), C1(Methylthio)                  | 2174.06375 | 46 | 62  |      | 4.18  | Expt2 |
| GLIENTSOR                     | 3  | 111185907                              | N-Term(iTRAQ4plex)                                  | 1262.68413 | 46 | 57  |      | 3.58  | Expt2 |
| GPLQSVQVFGFR                  | 6  | 149254484:149262347                    | N-Term(iTRAQ4plex)                                  | 1331.76030 | 46 | 64  |      | 3.79  | Expt2 |
| DGEEAGAYDGR                   | 4  | 112293264                              | N-Term(iTRAQ4plex)                                  | 1380.61821 | 46 | 51  |      | 3.82  | Expt2 |
| TICAIENYQAEK                  | 3  | 33468931                               | N-Term(iTRAQ4plex), C3(Methylthio), K13(iTRAQ4plex) | 1829.93772 | 46 | 46  |      | 3.46  | Expt2 |
| SLETENAGLR                    | 2  | 162287370:161760667                    | N-Term(iTRAQ4plex)                                  | 1233.65630 | 46 | 56  |      | Expt2 |       |
| AEEQPELTSTPNFVVEVTK           | 3  | 112181167                              | N-Term(iTRAQ4plex), K20(iTRAQ4plex)                 | 2535.31675 | 46 | 79  |      | 4.35  | Expt2 |
| TEDLDDIIR                     | 2  | 70909345                               | N-Term(iTRAQ4plex)                                  | 1233.64495 | 46 |     |      | 3.67  | Expt2 |
| NAPELTPSSQLMAEK               | 4  | 161484644                              | N-Term(iTRAQ4plex), K16(iTRAQ4plex)                 | 1991.03472 | 46 | 60  |      | 4.89  | Expt2 |
| VYSLFLDESR                    | 3  | 6755382                                | N-Term(iTRAQ4plex)                                  | 1372.72466 | 46 | 53  |      | 3.64  | Expt2 |
| TCLLNETGDPEFYK                | 15 | 149269782:31982332                     | N-Term(iTRAQ4plex), C2(Methylthio), K15(iTRAQ4plex) | 2092.00005 | 45 | 64  |      | 4.76  | Expt2 |
| TLGILGLGR                     | 8  | 52353955                               | N-Term(iTRAQ4plex)                                  | 1043.67192 | 45 | 56  |      | 3.43  | Expt2 |
| IYAPQGLLLTDPIER               | 1  | 82999846:109809747                     | N-Term(iTRAQ4plex)                                  | 1843.05118 | 45 |     |      | Expt2 |       |
| AVLAESYER                     | 2  | 110347487                              | N-Term(iTRAQ4plex)                                  | 1181.62407 | 45 | 34  |      | Expt2 |       |
| VWGNVGTVEWADPIEDPPEVMAK       | 3  | 114145493:29788787                     | N-Term(iTRAQ4plex), K24(iTRAQ4plex)                 | 2942.45377 | 45 | 60  |      | 4.79  | Expt2 |
| LELFLPEEYPMMAAPK              | 4  | 18017605:149260581:149260615:149262987 | N-Term(iTRAQ4plex), K15(iTRAQ4plex)                 | 2036.10019 | 45 |     |      | 4.16  | Expt2 |
| NHEEELSOAGGPGVEVNMEDAAPGVDLTK | 3  | 118130981                              | N-Term(iTRAQ4plex), K31(iTRAQ4plex)                 | 3556.71347 | 45 | 96  |      | 6.64  | Expt2 |
| LOQLPADFGFR                   | 2  | 19527026                               | N-Term(iTRAQ4plex)                                  | 1288.71428 | 45 | 46  |      | Expt2 |       |
| OSTSFLVLQEIILESDGK            | 5  | 158635992                              | N-Term(iTRAQ4plex), K17(iTRAQ4plex)                 | 2182.19072 | 45 | 70  |      | 3.93  | Expt2 |
| ICDDELILIK                    | 8  | 110625624                              | N-Term(iTRAQ4plex), C2(Methylthio), K10(iTRAQ4plex) | 1508.83684 | 45 | 55  |      | 3.77  | Expt2 |
| VCEEIAIIPSK                   | 9  | 149261626:149261791:63680669:6677801   | N-Term(iTRAQ4plex), C2(Methylthio), K11(iTRAQ4plex) | 1535.83928 | 45 | 51  |      | 3.51  | Expt2 |
| NYPNTFWMNPQYLK                | 3  | 157951598                              | N-Term(iTRAQ4plex), K15(iTRAQ4plex)                 | 2217.14701 | 45 | 38  |      | 4.87  | Expt2 |
| NASTFEEVQVPSAYQK              | 6  | 75677414                               | N-Term(iTRAQ4plex), K17(iTRAQ4plex)                 | 2185.14292 | 45 | 36  |      | 4.92  | Expt2 |
| DTGNLYCTGR                    | 8  | 7305007                                | N-Term(iTRAQ4plex), C7(Methylthio)                  | 1289.57073 | 45 | 49  |      | 3.60  | Expt2 |
| ELEDATETADAMNR                | 4  | 114326446                              | N-Term(iTRAQ4plex), M12(Oxidation)                  | 1725.77251 | 45 | 79  |      | 4.60  | Expt2 |
| GFOFVSSSLPDIYR                | 11 | 157909782:7304969:157909784            | N-Term(iTRAQ4plex), C13(Methylthio)                 | 1908.91606 | 45 | 55  |      | 3.91  | Expt2 |
| DFQLFSSPLGK                   | 4  | 20330802                               | N-Term(iTRAQ4plex), K11(iTRAQ4plex)                 | 1526.85514 | 45 | 38  |      | 3.92  | Expt2 |
| LFQYOPTIYYPK                  | 4  | 21553309                               | N-Term(iTRAQ4plex), K12(iTRAQ4plex)                 | 1777.97722 | 45 | 52  |      | 3.45  | Expt2 |
| LAVYIDR                       | 3  | 162287370:161760667                    | N-Term(iTRAQ4plex)                                  | 993.58525  | 45 | 35  |      | Expt2 |       |
| VLEGMVVVR                     | 3  | 71774133                               | N-Term(iTRAQ4plex)                                  | 1161.64189 | 45 |     |      | Expt2 |       |
| TIELTAH                       | 20 | 149267092:6857757                      | N-Term(iTRAQ4plex)                                  | 928.52385  | 45 | 43  |      | Expt2 |       |
| SVPMPPGIK                     | 8  | 16033372                               | N-Term(iTRAQ4plex), M4(Oxidation), K10(iTRAQ4plex)  | 1328.79302 | 45 | 50  |      | Expt2 |       |
| LALDMEISAYR                   | 4  | 188219589:113195686                    | N-Term(iTRAQ4plex)                                  | 1425.75554 | 45 | 53  |      | 3.81  | Expt2 |
| VLSYAPGLNDMQQLAR              | 7  | 160333789                              | N-Term(iTRAQ4plex)                                  | 2132.09214 | 45 | 68  |      | 4.16  | Expt2 |
| VTAMQLYECQLIDK                | 6  | 82950147:82950149:149264086            | N-Term(iTRAQ4plex), C9(Methylthio), K14(iTRAQ4plex) | 1989.00730 | 45 | 54  |      | 4.96  | Expt2 |

|                            |    |                                                                                                                        |                                                     |            |    |     |      |       |
|----------------------------|----|------------------------------------------------------------------------------------------------------------------------|-----------------------------------------------------|------------|----|-----|------|-------|
| SNPDITPVLR                 | 2  | 123173870                                                                                                              | N-Term(iTRAQ4plex)                                  | 1255.71111 | 45 | 42  |      | Expt2 |
| ADALQAGASQFETSSAAK         | 3  | 6678551;6678553                                                                                                        | N-Term(iTRAQ4plex), K17(iTRAQ4plex)                 | 1954.01548 | 45 | 79  | 5.99 | Expt2 |
| VMILITDGG                  | 2  | 111074529                                                                                                              | N-Term(iTRAQ4plex), M2(Oxidation), K9(iTRAQ4plex)   | 1293.76677 | 45 | 52  |      | Expt2 |
| NLMQLNMAK                  | 3  | 6680554                                                                                                                | N-Term(iTRAQ4plex), M3(Oxidation), K9(iTRAQ4plex)   | 1366.75151 | 45 | 41  | 3.46 | Expt2 |
| SPFSVGVSPSLDLSK            | 5  | 125347376                                                                                                              | N-Term(iTRAQ4plex), K15(iTRAQ4plex)                 | 1808.00749 | 45 | 76  | 4.46 | Expt2 |
| DVEDEILWVTER               | 6  | 55926127                                                                                                               | N-Term(iTRAQ4plex)                                  | 1647.84148 | 45 | 53  | 4.68 | Expt2 |
| VAFSVAR                    | 1  | 149252852;149255712;149255714;149255716;94404874;149270989;149270991;149270993;149271090;149271092;149271094;149274463 | N-Term(iTRAQ4plex)                                  | 893.53331  | 45 |     |      | Expt2 |
| LNIPVQVNPVR                | 6  | 21450277                                                                                                               | N-Term(iTRAQ4plex)                                  | 1407.81836 | 45 | 50  |      | Expt2 |
| EAYPEAYIADLDAK             | 9  | 29293809                                                                                                               | N-Term(iTRAQ4plex), K15(iTRAQ4plex)                 | 1985.99455 | 45 | 49  | 3.69 | Expt2 |
| TFDAIVMDPK                 | 3  | 86198316                                                                                                               | N-Term(iTRAQ4plex), K10(iTRAQ4plex)                 | 1424.77544 | 45 | 35  | 0.99 | Expt2 |
| SVPASNYV                   | 6  | 6753440                                                                                                                | N-Term(iTRAQ4plex)                                  | 980.51659  | 45 | 51  |      | Expt2 |
| DEQLESFQR                  | 3  | 13385624                                                                                                               | N-Term(iTRAQ4plex)                                  | 1408.72307 | 45 | 54  | 3.81 | Expt2 |
| LILDSAR                    | 52 | 6678359                                                                                                                | N-Term(iTRAQ4plex)                                  | 931.57128  | 45 | 44  |      | Expt2 |
| FAGVDIR                    | 1  | 149254484;149262347                                                                                                    | N-Term(iTRAQ4plex)                                  | 921.52843  | 45 |     |      | Expt2 |
| ILAATIDNSR                 | 20 | 226823220                                                                                                              | N-Term(iTRAQ4plex)                                  | 1217.69792 | 45 | 59  | 3.47 | Expt2 |
| ELATVLSDDQGLLGPK           | 4  | 28395023                                                                                                               | N-Term(iTRAQ4plex), K16(iTRAQ4plex)                 | 1926.11075 | 45 | 44  | 3.81 | Expt2 |
| F5MPGFK                    | 2  | 61743961                                                                                                               | N-Term(iTRAQ4plex), K7(iTRAQ4plex)                  | 1101.61028 | 45 | 40  |      | Expt2 |
| LAACGPPDPAPCAELVR          | 10 | 31982260                                                                                                               | N-Term(iTRAQ4plex), C4(Methylthio), C12(Methylthio) | 1915.90581 | 45 | 64  | 4.42 | Expt2 |
| GMGPGTPAGYGR               | 3  | 149252953;23956214                                                                                                     | N-Term(iTRAQ4plex)                                  | 1264.62602 | 45 | 47  | 3.71 | Expt2 |
| ELLASYENR                  | 8  | 112421039                                                                                                              | N-Term(iTRAQ4plex)                                  | 1238.64873 | 45 | 44  |      | Expt2 |
| NVQAEEMVEFSSGLK            | 8  | 6680748                                                                                                                | N-Term(iTRAQ4plex), K15(iTRAQ4plex)                 | 1956.00418 | 45 | 47  | 4.68 | Expt2 |
| FSFGLLDSFPR                | 3  | 148839318                                                                                                              | N-Term(iTRAQ4plex)                                  | 1429.76213 | 45 | 44  | 3.44 | Expt2 |
| GVQGGPPAGPR                | 3  | 34328108                                                                                                               | N-Term(iTRAQ4plex)                                  | 1233.68242 | 45 | 51  | 3.40 | Expt2 |
| ELAPLQELIEK                | 6  | 62412947;21704148                                                                                                      | N-Term(iTRAQ4plex), K11(iTRAQ4plex)                 | 1570.93266 | 45 | 58  | 4.10 | Expt2 |
| GTGTDDEDALIELITTR          | 8  | 149254235;160707925                                                                                                    | N-Term(iTRAQ4plex)                                  | 1848.97515 | 45 | 108 | 5.21 | Expt2 |
| FAVYLPPOAESGK              | 8  | 149264832;63660228;13937355                                                                                            | N-Term(iTRAQ4plex), K13(iTRAQ4plex)                 | 1694.93950 | 45 | 81  | 4.33 | Expt2 |
| DGNLMFDQVPMVEIDGMK         | 8  | 149259801;149260087;169808401;50263046;154350202                                                                       | N-Term(iTRAQ4plex), M11(Oxidation), K18(iTRAQ4plex) | 2343.12920 | 45 | 54  | 4.77 | Expt2 |
| TNIIPVLEDAR                | 18 | 149251501;149251503;51921297                                                                                           | N-Term(iTRAQ4plex)                                  | 1384.79302 | 45 | 50  |      | Expt2 |
| LLDYVPIGPR                 | 1  | 31543349                                                                                                               | N-Term(iTRAQ4plex)                                  | 1286.76067 | 45 |     |      | Expt2 |
| ITESEEVVSR                 | 8  | 162287370;161760667                                                                                                    | N-Term(iTRAQ4plex)                                  | 1292.68450 | 45 | 62  | 3.65 | Expt2 |
| NLCSDDTPMVR                | 3  | 8394027                                                                                                                | N-Term(iTRAQ4plex), C3(Methylthio)                  | 1440.64079 | 45 | 40  | 4.50 | Expt2 |
| LTLIDPETLLPR               | 2  | 189409138                                                                                                              | N-Term(iTRAQ4plex)                                  | 1524.91338 | 45 | 48  |      | Expt2 |
| LOALQRVLSR                 | 1  | 6755971                                                                                                                | N-Term(iTRAQ4plex), Q5(Deamidated)                  | 1456.85503 | 45 |     |      | Expt2 |
| LDAEVPTR                   | 1  | 9790161                                                                                                                | N-Term(iTRAQ4plex)                                  | 1044.58220 | 45 |     |      | Expt2 |
| GFSEGLWEIENNPVK            | 5  | 188497724                                                                                                              | N-Term(iTRAQ4plex), K16(iTRAQ4plex)                 | 2108.09433 | 45 | 59  | 4.18 | Expt2 |
| ILITVPPNLR                 | 3  | 13385872                                                                                                               | N-Term(iTRAQ4plex)                                  | 1380.87053 | 45 | 49  | 3.53 | Expt2 |
| LAIWDTAGOER                | 3  | 30841008                                                                                                               | N-Term(iTRAQ4plex)                                  | 1403.73931 | 44 | 48  | 3.54 | Expt2 |
| TIYTPGTVLYR                | 11 | 126518317                                                                                                              | N-Term(iTRAQ4plex)                                  | 1514.83379 | 44 | 53  | 3.47 | Expt2 |
| FLIDGFPR                   | 6  | 165377065                                                                                                              | N-Term(iTRAQ4plex)                                  | 1108.62920 | 44 | 35  |      | Expt2 |
| LPFAAAQIGNSFR              | 3  | 93102417                                                                                                               | N-Term(iTRAQ4plex)                                  | 1535.84307 | 44 | 51  | 3.72 | Expt2 |
| AYLQQLR                    | 1  | 9790141                                                                                                                | N-Term(iTRAQ4plex)                                  | 1035.60820 | 44 |     |      | Expt2 |
| LPVGTATLYFR                | 2  | 226342960;19923070                                                                                                     | N-Term(iTRAQ4plex)                                  | 1482.84746 | 44 | 67  |      | Expt2 |
| TSSELFQAQPVDFPGTAVESVTDSSR | 11 | 13384758                                                                                                               | N-Term(iTRAQ4plex)                                  | 2940.44181 | 44 | 83  | 6.02 | Expt2 |
| IAQFLSGIPEYVPLSTVNR        | 4  | 18700004;22122797                                                                                                      | N-Term(iTRAQ4plex)                                  | 2186.23716 | 44 | 56  | 3.64 | Expt2 |
| VLDLTLAK                   | 4  | 6754480                                                                                                                | N-Term(iTRAQ4plex), K9(iTRAQ4plex)                  | 1289.80632 | 44 | 62  | 3.41 | Expt2 |
| YLGINSGLVWGR               | 3  | 225543552                                                                                                              | N-Term(iTRAQ4plex)                                  | 1506.84087 | 44 | 56  | 3.76 | Expt2 |
| CNDTIPEDFQEQFQTSFDR        | 5  | 6755781                                                                                                                | N-Term(iTRAQ4plex), C1(Methylthio)                  | 2510.07730 | 44 | 58  |      | Expt2 |
| GEELSCER                   | 7  | 134023662                                                                                                              | N-Term(iTRAQ4plex), C6(Methylthio)                  | 1241.52971 | 44 | 54  | 3.59 | Expt2 |
| LSYQNDPSFGSYAVPIR          | 15 | 7305007                                                                                                                | N-Term(iTRAQ4plex)                                  | 2058.04473 | 44 | 87  | 4.99 | Expt2 |
| GEFGDVMLGDYR               | 3  | 31560712                                                                                                               | N-Term(iTRAQ4plex)                                  | 1502.70720 | 44 | 54  | 4.06 | Expt2 |
| LFVQDLATR                  | 2  | 61657921                                                                                                               | N-Term(iTRAQ4plex)                                  | 1206.69536 | 44 | 33  |      | Expt2 |
| GSILDPSPEAAVGGNVLTSQR      | 5  | 23346557                                                                                                               | N-Term(iTRAQ4plex)                                  | 2311.24344 | 44 | 71  | 5.37 | Expt2 |
| WLGPILGYDTD                | 6  | 124487479                                                                                                              | N-Term(iTRAQ4plex), Y8(iTRAQ4plex)                  | 1537.80889 | 44 |     |      | Expt2 |

|                        |    |                                                                 |                                                     |            |    |    |      |       |
|------------------------|----|-----------------------------------------------------------------|-----------------------------------------------------|------------|----|----|------|-------|
| IOTOPGYANTLR           | 10 | 149258501;19526818                                              | N-Term(iTRAQ4plex)                                  | 1505.82109 | 44 | 65 | 3.85 | Expt2 |
| SGFSSVSVCR             | 37 | 54607171;113195684                                              | N-Term(iTRAQ4plex), C9(Methylthio)                  | 1218.57366 | 44 | 65 | 4.28 | Expt2 |
| VEPAVSSIVNSIQVLASK     | 3  | 19482168;124486712                                              | N-Term(iTRAQ4plex), K18(iTRAQ4plex)                 | 2129.24741 | 44 | 61 | 4.69 | Expt2 |
| VPSGLVLTGCER           | 3  | 183979966                                                       | N-Term(iTRAQ4plex), C10(Methylthio)                 | 1484.73528 | 44 | 41 |      | Expt2 |
| VLETAEDIOER            | 3  | 115496850                                                       | N-Term(iTRAQ4plex)                                  | 1446.75981 | 44 | 38 | 3.58 | Expt2 |
| LFLAGYDPTPTMR          | 2  | 19526826;164518904                                              | N-Term(iTRAQ4plex), M12(Oxidation)                  | 1641.84551 | 44 | 38 |      | Expt2 |
| VLGDIPPPYDK            | 2  | 31981945                                                        | N-Term(iTRAQ4plex), K11(iTRAQ4plex)                 | 1501.83354 | 44 | 37 |      | Expt2 |
| SMAEAMIQLOEELAAER      | 10 | 114326446                                                       | N-Term(iTRAQ4plex), M2(Oxidation), M6(Oxidation)    | 2225.05954 | 44 | 61 | 4.80 | Expt2 |
| SFEISPNR               | 9  | 111074529                                                       | N-Term(iTRAQ4plex)                                  | 1093.57671 | 44 | 40 |      | Expt2 |
| TSEVODLODEVQR          | 3  | 229577163;6679671                                               | N-Term(iTRAQ4plex)                                  | 1690.83623 | 44 | 51 | 4.29 | Expt2 |
| LAEPSQLLK              | 1  | 28395018                                                        | N-Term(iTRAQ4plex), K9(iTRAQ4plex)                  | 1286.80449 | 44 |    |      | Expt2 |
| GAYPVFFNFTR            | 5  | 124001560                                                       | N-Term(iTRAQ4plex)                                  | 1462.76067 | 44 | 52 | 3.68 | Expt2 |
| ODMEOAMTPSEMANALGPLALK | 2  | 153792526                                                       | N-Term(iTRAQ4plex), K22(iTRAQ4plex)                 | 2634.32480 | 44 | 69 |      | Expt2 |
| DYIWNLTNSGR            | 6  | 13385942                                                        | N-Term(iTRAQ4plex)                                  | 1482.74333 | 44 | 52 | 3.69 | Expt2 |
| FVVDLSDQVAPTDIEEGMR    | 6  | 33859604                                                        | N-Term(iTRAQ4plex), M18(Oxidation)                  | 2281.12113 | 44 | 67 | 5.21 | Expt2 |
| NPPGFARVFEEDPR         | 12 | 8567402;149251459;149266618;22122585                            | N-Term(iTRAQ4plex)                                  | 1765.86893 | 44 | 54 | 4.35 | Expt2 |
| NNFSDLGWSGPNPTPGFSR    | 3  | 161484644                                                       | N-Term(iTRAQ4plex)                                  | 2322.10416 | 44 | 53 | 4.72 | Expt2 |
| NFAFLFR                | 2  | 164565377                                                       | N-Term(iTRAQ4plex)                                  | 1187.63457 | 44 | 32 |      | Expt2 |
| SDFOVNLNNASR           | 5  | 146219835;146219830;146219849;146231979                         | N-Term(iTRAQ4plex)                                  | 1508.76152 | 44 | 51 | 3.82 | Expt2 |
| MLLIENLR               | 2  | 110735428;110735426                                             | N-Term(iTRAQ4plex)                                  | 1145.68389 | 44 | 34 |      | Expt2 |
| ITMQNLNDR              | 6  | 6754480;6680606                                                 | N-Term(iTRAQ4plex)                                  | 1248.65044 | 44 | 45 | 3.64 | Expt2 |
| TLTDLLLR               | 2  | 6755997                                                         | N-Term(iTRAQ4plex)                                  | 1088.68120 | 44 | 39 |      | Expt2 |
| DILIQYDR               | 7  | 149254484                                                       | N-Term(iTRAQ4plex)                                  | 1179.64751 | 44 | 39 |      | Expt2 |
| VSADPEFAR              | 1  | 6671688                                                         | N-Term(iTRAQ4plex)                                  | 1135.58782 | 44 |    |      | Expt2 |
| ISMPEIDLNLK            | 8  | 61743961                                                        | N-Term(iTRAQ4plex), K11(iTRAQ4plex)                 | 1560.90178 | 44 | 60 | 3.59 | Expt2 |
| QAFQIGSPWR             | 2  | 7106242;85861182                                                | N-Term(iTRAQ4plex)                                  | 1333.71526 | 44 |    | 3.96 | Expt2 |
| QYPSLVLAPTR            | 3  | 25141235;6753620;14861844                                       | N-Term(iTRAQ4plex)                                  | 1501.89238 | 44 | 50 |      | Expt2 |
| GENLVSMITVEGPPK        | 2  | 7305509;6678053                                                 | N-Term(iTRAQ4plex), K15(iTRAQ4plex)                 | 1842.98398 | 44 |    | 4.67 | Expt2 |
| DEAAYGALR              | 6  | 20137004;71725358                                               | N-Term(iTRAQ4plex)                                  | 1109.57012 | 44 | 59 |      | Expt2 |
| TAVCDIPPR              | 14 | 33859488;31981939;7106439;22165384;21746161;149253488;149253527 | N-Term(iTRAQ4plex), C4(Methylthio)                  | 1161.58586 | 44 | 55 |      | Expt2 |
| LADALQELR              | 8  | 9506843;162287370;161760667                                     | N-Term(iTRAQ4plex)                                  | 1172.67558 | 44 | 39 | 3.45 | Expt2 |
| GEETPVIVGSCALCEQR      | 3  | 149258822;27370092;254911131                                    | N-Term(iTRAQ4plex), C13(Methylthio)                 | 2062.04496 | 44 | 46 | 4.50 | Expt2 |
| GFSLEELR               | 16 | 149251177;149252074;149258092;94397192;94407673                 | N-Term(iTRAQ4plex)                                  | 1094.59587 | 44 | 48 | 3.53 | Expt2 |
| VTDSSVSVOLRE           | 4  | 124487435                                                       | N-Term(iTRAQ4plex)                                  | 1463.78301 | 44 | 48 | 3.50 | Expt2 |
| VAGMDVELTVEER          | 7  | 226874906                                                       | N-Term(iTRAQ4plex)                                  | 1591.81658 | 44 | 73 | 4.40 | Expt2 |
| NIDYPVDLEISR           | 3  | 6678493                                                         | N-Term(iTRAQ4plex)                                  | 1577.83330 | 44 | 58 |      | Expt2 |
| LLDPEDVNVDPDEK         | 2  | 55926127                                                        | N-Term(iTRAQ4plex), K15(iTRAQ4plex)                 | 2014.03240 | 44 | 56 |      | Expt2 |
| EMVLEIIR               | 2  | 224922832;84662730                                              | N-Term(iTRAQ4plex)                                  | 1146.66606 | 44 |    |      | Expt2 |
| VVLQDDPQOTR            | 2  | 112421039                                                       | N-Term(iTRAQ4plex)                                  | 1455.80742 | 44 | 45 |      | Expt2 |
| MLVLDEADEMLNK          | 5  | 51712358;51717030;20149756                                      | N-Term(iTRAQ4plex), K13(iTRAQ4plex)                 | 1808.94634 | 44 | 74 | 4.59 | Expt2 |
| NSEPLVGIHLDNGGK        | 6  | 226423922                                                       | N-Term(iTRAQ4plex), K15(iTRAQ4plex)                 | 1814.02549 | 44 | 69 | 4.19 | Expt2 |
| TGOPMINLYTDR           | 3  | 20982845                                                        | N-Term(iTRAQ4plex)                                  | 1552.79119 | 44 | 54 | 3.77 | Expt2 |
| VITLPEEEAR             | 16 | 6754524;257743039                                               | N-Term(iTRAQ4plex)                                  | 1288.68828 | 44 | 52 | 3.78 | Expt2 |
| AGEQLAPFLPOLVPR        | 5  | 37718970                                                        | N-Term(iTRAQ4plex)                                  | 1780.03008 | 44 | 47 | 3.74 | Expt2 |
| EQVIAALR               | 2  | 171906578                                                       | N-Term(iTRAQ4plex)                                  | 1043.63591 | 44 | 31 |      | Expt2 |
| SOLIVVEEGSEPELMK       | 3  | 226246550;226246552                                             | N-Term(iTRAQ4plex), M16(Oxidation), K17(iTRAQ4plex) | 2179.14804 | 44 | 55 | 4.65 | Expt2 |
| LYDNLLEONLIR           | 8  | 134053905                                                       | N-Term(iTRAQ4plex)                                  | 1647.92107 | 44 | 48 | 4.59 | Expt2 |
| GEAGSPGPPGTGAR         | 4  | 34328108                                                        | N-Term(iTRAQ4plex)                                  | 1451.73699 | 44 | 85 | 4.32 | Expt2 |
| DLYPVIK                | 8  | 163310769                                                       | N-Term(iTRAQ4plex), K7(iTRAQ4plex)                  | 1135.69243 | 44 | 45 |      | Expt2 |
| DFSATDLTEFAAR          | 3  | 29126205                                                        | N-Term(iTRAQ4plex)                                  | 1587.77982 | 43 | 63 | 4.06 | Expt2 |
| GVFSGLR                | 11 | 20137008                                                        | N-Term(iTRAQ4plex)                                  | 879.51897  | 43 | 38 |      | Expt2 |
| GDSVIVLRL              | 6  | 58037145;63501063;82889713                                      | N-Term(iTRAQ4plex)                                  | 1101.67766 | 43 | 51 |      | Expt2 |
| SDTSDIPLLSQVESK        | 1  | 61098124                                                        | N-Term(iTRAQ4plex), K16(iTRAQ4plex)                 | 2020.10593 | 43 |    |      | Expt2 |

|                              |    |                                                                    |                                                     |            |    |     |      |      |       |
|------------------------------|----|--------------------------------------------------------------------|-----------------------------------------------------|------------|----|-----|------|------|-------|
| AVCMLSNNTAIAEAWAR            | 8  | 6755901;34740335;6678465;6678467;51765047;82930560;8394493;6678469 | N-Term(iTRAQ4plex), C3(Methylthio)                  | 1997.97782 | 43 | 84  |      | 5.35 | Expt2 |
| DPTVEFPDLCR                  | 2  | 134288917                                                          | N-Term(iTRAQ4plex), C11(Methylthio)                 | 1665.77788 | 43 | 63  |      |      | Expt2 |
| AGDWOCPNPGCGNQNFRAW          | 3  | 88853581                                                           | N-Term(iTRAQ4plex), C6(Methylthio), C11(Methylthio) | 2356.96048 | 43 | 59  |      | 4.89 | Expt2 |
| GOAGVMGFPGPK                 | 13 | 34328108                                                           | N-Term(iTRAQ4plex), M6(Oxidation), K12(iTRAQ4plex)  | 1449.77336 | 43 | 50  |      | 3.55 | Expt2 |
| FVMOEFSR                     | 8  | 112293264                                                          | N-Term(iTRAQ4plex)                                  | 1316.64311 | 43 | 31  |      | 3.69 | Expt2 |
| AOIQAOQPSIDVVVYK             | 3  | 16716499                                                           | N-Term(iTRAQ4plex), K17(iTRAQ4plex)                 | 2239.19767 | 43 | 56  |      | 4.89 | Expt2 |
| FEDYLNAESR                   | 9  | 28173550                                                           | N-Term(iTRAQ4plex)                                  | 1387.66020 | 43 | 47  |      | 3.95 | Expt2 |
| ELEFYLR                      | 4  | 149257598;82922494;28491531;149264053                              | N-Term(iTRAQ4plex)                                  | 1113.60747 | 43 | 31  |      |      | Expt2 |
| ELVNLGTIPVR                  | 4  | 11230780                                                           | N-Term(iTRAQ4plex)                                  | 1455.86858 | 43 | 68  |      | 3.87 | Expt2 |
| NYMSNPNSYNYEIVNR             | 3  | 134288917                                                          | N-Term(iTRAQ4plex)                                  | 2007.93035 | 43 | 65  |      | 3.73 | Expt2 |
| GDFCQVGR                     | 17 | 94375800;149262292;149274354;6679078                               | N-Term(iTRAQ4plex), C4(Methylthio)                  | 1184.56658 | 43 | 47  |      |      | Expt2 |
| WNLLQQQTITTSK                | 6  | 133778953                                                          | N-Term(iTRAQ4plex), K14(iTRAQ4plex)                 | 1934.05950 | 43 | 71  |      | 5.01 | Expt2 |
| GLEVTAYSPLGSSDR              | 7  | 149252910;10946870                                                 | N-Term(iTRAQ4plex)                                  | 1695.86833 | 43 | 43  |      | 4.67 | Expt2 |
| ALASNLR                      | 3  | 163310769                                                          | N-Term(iTRAQ4plex)                                  | 888.54051  | 43 | 38  |      |      | Expt2 |
| LLIEELR                      | 2  | 9506739                                                            | N-Term(iTRAQ4plex)                                  | 1029.64141 | 43 | 32  |      |      | Expt2 |
| LEALGTWHEELGR                | 3  | 55926127                                                           | N-Term(iTRAQ4plex)                                  | 1574.83245 | 43 | 58  |      | 4.27 | Expt2 |
| ILLTPMAAGSR                  | 7  | 111074529                                                          | N-Term(iTRAQ4plex), M6(Oxidation)                   | 1289.73613 | 43 | 52  |      |      | Expt2 |
| EMGNTVMDIIR                  | 2  | 209862915                                                          | N-Term(iTRAQ4plex)                                  | 1422.72185 | 43 | 52  |      |      | Expt2 |
| ENLATVEGNFASIDAR             | 7  | 28076935                                                           | N-Term(iTRAQ4plex)                                  | 1850.93950 | 43 | 70  |      | 4.77 | Expt2 |
| FLPSYQAVEYMR                 | 2  | 54292135                                                           | N-Term(iTRAQ4plex)                                  | 1647.84050 | 43 | 39  |      |      | Expt2 |
| ALLSPTFTSGR                  | 4  | 149274500;28893549;6681115                                         | N-Term(iTRAQ4plex)                                  | 1293.72612 | 43 | 62  |      |      | Expt2 |
| LPSDVVTSVR                   | 5  | 8393866                                                            | N-Term(iTRAQ4plex)                                  | 1216.70256 | 43 | 56  |      |      | Expt2 |
| VDSYGGFLR                    | 1  | 149253040;183979966                                                | N-Term(iTRAQ4plex)                                  | 1157.60735 | 43 |     |      |      | Expt2 |
| LENEIQTYR                    | 16 | 112983636                                                          | N-Term(iTRAQ4plex)                                  | 1309.68559 | 43 | 43  |      | 3.87 | Expt2 |
| LVLDLR                       | 2  | 29336026                                                           | N-Term(iTRAQ4plex)                                  | 1000.62737 | 43 | 31  |      |      | Expt2 |
| AVFPQNLVSSVDVQSEVPDOR        | 11 | 239052674                                                          | N-Term(iTRAQ4plex), N6(Deamidated)                  | 2714.42136 | 43 | 113 |      | 4.29 | Expt2 |
| YIWSPVCR                     | 3  | 84871986                                                           | N-Term(iTRAQ4plex), C8(Methylthio)                  | 1326.68437 | 43 | 35  |      |      | Expt2 |
| LFYDGLGMPDQEEELFGPVSLQVK     | 3  | 114145467                                                          | N-Term(iTRAQ4plex), M9(Oxidation), K25(iTRAQ4plex)  | 3112.58677 | 43 | 41  |      | 4.92 | Expt2 |
| IGFPWSEIR                    | 8  | 149266483;157277952;70778915;157277948                             | N-Term(iTRAQ4plex)                                  | 1248.68987 | 43 | 38  |      |      | Expt2 |
| TALVANTSMPVAAR               | 4  | 31560731                                                           | N-Term(iTRAQ4plex)                                  | 1659.89665 | 43 | 76  |      | 3.86 | Expt2 |
| VDIDVPDNIIEGPEK              | 12 | 61743961                                                           | N-Term(iTRAQ4plex), K16(iTRAQ4plex)                 | 1984.04766 | 43 | 111 | 1.16 |      | Expt2 |
| ADMVIEAFEDLGVK               | 3  | 33859811                                                           | N-Term(iTRAQ4plex), M3(Oxidation), K15(iTRAQ4plex)  | 1940.03116 | 43 | 46  |      | 3.46 | Expt2 |
| MFFDAELSQMOTHVSDTSVLSMDNNR   | 36 | 20911031                                                           | N-Term(iTRAQ4plex), M10(Oxidation)                  | 3262.50510 | 43 | 76  |      | 7.15 | Expt2 |
| FADLSEANR                    | 12 | 31982755                                                           | N-Term(iTRAQ4plex)                                  | 1237.63359 | 43 | 57  |      | 3.62 | Expt2 |
| ILDETQEAVEYOR                | 3  | 147904547                                                          | N-Term(iTRAQ4plex)                                  | 1737.88127 | 43 | 68  |      | 4.77 | Expt2 |
| VELEAR                       | 4  | 20911031                                                           | N-Term(iTRAQ4plex)                                  | 860.49858  | 43 |     |      |      | Expt2 |
| VEGFEETVDGR                  | 5  | 7304975                                                            | N-Term(iTRAQ4plex)                                  | 1567.73686 | 43 | 70  |      | 4.26 | Expt2 |
| NGMLNVSPIGR                  | 3  | 33468959;8393988                                                   | N-Term(iTRAQ4plex), N1(Deamidated)                  | 1302.69756 | 43 | 46  |      | 3.77 | Expt2 |
| ELLREPEVR                    | 9  | 50053999                                                           | N-Term(iTRAQ4plex)                                  | 1284.72844 | 43 | 36  |      |      | Expt2 |
| FMNPFNLNLYOK                 | 7  | 14389431                                                           | N-Term(iTRAQ4plex), K13(iTRAQ4plex)                 | 1914.02872 | 43 | 63  |      | 4.28 | Expt2 |
| IYTSIGEDYDER                 | 4  | 6679299                                                            | N-Term(iTRAQ4plex)                                  | 1604.75786 | 43 | 53  |      | 3.86 | Expt2 |
| AFLEENQLDYIIR                | 4  | 199559777                                                          | N-Term(iTRAQ4plex)                                  | 1767.94695 | 43 | 57  |      | 4.07 | Expt2 |
| SQEVAPLPOR                   | 5  | 111185907                                                          | N-Term(iTRAQ4plex)                                  | 1268.71062 | 43 | 43  |      |      | Expt2 |
| VAIDLGYR                     | 2  | 160707894                                                          | N-Term(iTRAQ4plex)                                  | 1050.60723 | 43 |     |      | 3.47 | Expt2 |
| VESTEQLIEIASR                | 3  | 153791270                                                          | N-Term(iTRAQ4plex)                                  | 1618.87676 | 43 | 49  |      | 4.82 | Expt2 |
| FDTGNLCMVTGGANLGR            | 6  | 6677805                                                            | N-Term(iTRAQ4plex), C7(Methylthio)                  | 1915.89457 | 43 | 48  |      | 4.16 | Expt2 |
| ELFQETLESRL                  | 5  | 29336026                                                           | N-Term(iTRAQ4plex)                                  | 1508.81352 | 43 | 41  |      | 4.18 | Expt2 |
| LLDVEEQELENFPLPTVQHSQTVLNQLR | 3  | 21040233                                                           | N-Term(iTRAQ4plex)                                  | 3520.84780 | 43 | 39  |      | 3.49 | Expt2 |
| FGTLFTMDR                    | 24 | 6678321                                                            | N-Term(iTRAQ4plex)                                  | 1231.62488 | 43 | 48  |      | 3.64 | Expt2 |
| VYEEDAVPGLTPCR               | 12 | 46593021                                                           | N-Term(iTRAQ4plex), C13(Methylthio)                 | 1738.82927 | 43 | 63  |      | 3.86 | Expt2 |
| IILTAQPFRR                   | 2  | 6679891                                                            | N-Term(iTRAQ4plex)                                  | 1202.73894 | 43 |     |      |      | Expt2 |
| NDDDSSEAMNDILAQVATNTETSK     | 3  | 56744242                                                           | N-Term(iTRAQ4plex), K24(iTRAQ4plex)                 | 2857.31888 | 43 | 50  |      | 4.29 | Expt2 |
| GYPTLLLR                     | 6  | 83921612                                                           | N-Term(iTRAQ4plex)                                  | 1223.72954 | 43 | 40  |      | 3.47 | Expt2 |

|                              |    |                                                                                                                                                                                                                                                                                                           |                                                                     |            |    |     |      |       |
|------------------------------|----|-----------------------------------------------------------------------------------------------------------------------------------------------------------------------------------------------------------------------------------------------------------------------------------------------------------|---------------------------------------------------------------------|------------|----|-----|------|-------|
| LENLGIPEEELLR                | 2  | 27754097                                                                                                                                                                                                                                                                                                  | N-Term(iTRAQ4plex)                                                  | 1668.93328 | 43 |     | 3.66 | Expt2 |
| ENLLEEQGSIALR                | 6  | 115496850                                                                                                                                                                                                                                                                                                 | N-Term(iTRAQ4plex)                                                  | 1615.88274 | 43 | 65  | 4.26 | Expt2 |
| IQYQLVDISQDNALR              | 11 | 18017602                                                                                                                                                                                                                                                                                                  | N-Term(iTRAQ4plex)                                                  | 1920.03604 | 43 | 60  | 4.15 | Expt2 |
| LTTLELLEVR                   | 6  | 117938332;117938334                                                                                                                                                                                                                                                                                       | N-Term(iTRAQ4plex)                                                  | 1330.81133 | 43 | 50  | 3.51 | Expt2 |
| YMAEALLLR                    | 3  | 27552760                                                                                                                                                                                                                                                                                                  | N-Term(iTRAQ4plex)                                                  | 1223.69658 | 43 | 37  | 3.42 | Expt2 |
| YITQSGDYQLR                  | 2  | 160333502;160333508                                                                                                                                                                                                                                                                                       | N-Term(iTRAQ4plex)                                                  | 1487.76189 | 43 |     | 3.40 | Expt2 |
| EGLLLWCQR                    | 18 | 61097906;11230802;7304855;157951643                                                                                                                                                                                                                                                                       | N-Term(iTRAQ4plex), C7(Methylthio)                                  | 1307.67497 | 43 | 50  | 3.68 | Expt2 |
| VOPSLTPPDQPIQTLVLFRR         | 9  | 6755600                                                                                                                                                                                                                                                                                                   | N-Term(iTRAQ4plex)                                                  | 2421.36856 | 43 | 60  | 4.48 | Expt2 |
| FMQTFVLAPEGSVANK             | 3  | 7305075                                                                                                                                                                                                                                                                                                   | N-Term(iTRAQ4plex), K16(iTRAQ4plex)                                 | 2027.08367 | 43 | 76  | 4.01 | Expt2 |
| DTNGENIAESLVAEGLATR          | 6  | 77404392                                                                                                                                                                                                                                                                                                  | N-Term(iTRAQ4plex), N3(Deamidated)                                  | 2105.05387 | 43 | 74  | 5.17 | Expt2 |
| EAAQMDMVDNGVEDLR             | 3  | 10092608                                                                                                                                                                                                                                                                                                  | N-Term(iTRAQ4plex), M5(Oxidation), M7(Oxidation)                    | 1968.87749 | 43 | 68  |      | Expt2 |
| TPSAAYLWVGAGASEAEK           | 5  | 28916693                                                                                                                                                                                                                                                                                                  | N-Term(iTRAQ4plex), K18(iTRAQ4plex)                                 | 2096.09184 | 43 | 67  | 4.31 | Expt2 |
| FFQPTEMAADQDFQR              | 5  | 6671561;116256510                                                                                                                                                                                                                                                                                         | N-Term(iTRAQ4plex)                                                  | 2006.95781 | 43 | 53  | 4.14 | Expt2 |
| VSWNPVPGATEYR                | 5  | 115647999                                                                                                                                                                                                                                                                                                 | N-Term(iTRAQ4plex)                                                  | 1619.82952 | 43 | 51  | 4.30 | Expt2 |
| IDYIAGLSR                    | 2  | 118601013                                                                                                                                                                                                                                                                                                 | N-Term(iTRAQ4plex)                                                  | 1266.68242 | 43 | 42  |      | Expt2 |
| DVDFELIK                     | 3  | 6671702                                                                                                                                                                                                                                                                                                   | N-Term(iTRAQ4plex), K8(iTRAQ4plex)                                  | 1266.73015 | 43 | 42  | 3.52 | Expt2 |
| NAIANASTLAEVER               | 3  | 228480232                                                                                                                                                                                                                                                                                                 | N-Term(iTRAQ4plex)                                                  | 1602.85515 | 43 | 59  | 3.94 | Expt2 |
| YGAATFTR                     | 9  | 148277039;110347469                                                                                                                                                                                                                                                                                       | N-Term(iTRAQ4plex)                                                  | 1030.54529 | 43 | 45  |      | Expt2 |
| IIVLGLLPR                    | 12 | 40254624                                                                                                                                                                                                                                                                                                  | N-Term(iTRAQ4plex)                                                  | 1137.78606 | 42 | 36  |      | Expt2 |
| EPSDSWLIASLDLQNSSK           | 8  | 33469047                                                                                                                                                                                                                                                                                                  | N-Term(iTRAQ4plex), K18(iTRAQ4plex)                                 | 2278.18833 | 42 | 70  | 4.61 | Expt2 |
| VNAGDQPGADLPLITPOAK          | 3  | 19527258                                                                                                                                                                                                                                                                                                  | N-Term(iTRAQ4plex), K20(iTRAQ4plex)                                 | 2250.23764 | 42 | 48  | 5.27 | Expt2 |
| SSGEIVYCGQVFEK               | 3  | 149234111;58037465                                                                                                                                                                                                                                                                                        | N-Term(iTRAQ4plex), C8(Methylthio), K14(iTRAQ4plex)                 | 1879.92643 | 42 | 50  | 3.74 | Expt2 |
| APEDIDPQPGSYEIR              | 3  | 9507129                                                                                                                                                                                                                                                                                                   | N-Term(iTRAQ4plex)                                                  | 1830.90349 | 42 | 48  | 3.40 | Expt2 |
| VPVENLVGVEGGGFK              | 6  | 100817933                                                                                                                                                                                                                                                                                                 | N-Term(iTRAQ4plex), K15(iTRAQ4plex)                                 | 1789.00943 | 42 | 59  | 4.39 | Expt2 |
| DALNIETAVK                   | 6  | 149260099;6996913                                                                                                                                                                                                                                                                                         | N-Term(iTRAQ4plex), K10(iTRAQ4plex)                                 | 1361.79265 | 42 | 49  | 4.09 | Expt2 |
| LIGNMALLPLR                  | 3  | 9790141                                                                                                                                                                                                                                                                                                   | N-Term(iTRAQ4plex), M5(Oxidation)                                   | 1370.83537 | 42 | 43  |      | Expt2 |
| CECPVGFYNDK                  | 6  | 118197277                                                                                                                                                                                                                                                                                                 | N-Term(iTRAQ4plex), C1(Methylthio), C3(Methylthio), K12(iTRAQ4plex) | 1801.76548 | 42 | 46  | 3.73 | Expt2 |
| LVQNCWLTR                    | 13 | 6671684;28395018                                                                                                                                                                                                                                                                                          | N-Term(iTRAQ4plex), C5(Methylthio)                                  | 1435.76836 | 42 | 51  | 4.41 | Expt2 |
| AMGNLQIDFADPQR               | 6  | 94410730;41054806                                                                                                                                                                                                                                                                                         | N-Term(iTRAQ4plex)                                                  | 1719.85857 | 42 | 79  | 4.71 | Expt2 |
| LSSEMNTSTVNSAR               | 3  | 188219589                                                                                                                                                                                                                                                                                                 | N-Term(iTRAQ4plex), M5(Oxidation)                                   | 1656.80351 | 42 | 79  |      | Expt2 |
| VAIEPGVPR                    | 6  | 22128627                                                                                                                                                                                                                                                                                                  | N-Term(iTRAQ4plex)                                                  | 1081.64543 | 42 | 44  |      | Expt2 |
| EAMCPGVSGEDSSLLLATQVEGQTTNLR | 12 | 28395018                                                                                                                                                                                                                                                                                                  | N-Term(iTRAQ4plex), M3(Oxidation), C4(Methylthio)                   | 3240.53867 | 42 | 102 | 6.69 | Expt2 |
| AELNPWPPEYINTR               | 3  | 27229277                                                                                                                                                                                                                                                                                                  | N-Term(iTRAQ4plex)                                                  | 1746.89751 | 42 | 43  | 3.97 | Expt2 |
| TNGKEPELLEPIPYEFMA           | 5  | 149249111;82885114;149251901;149251962;149255371;149257782;149259532;149262565;82949522;38075571;51770297;149269802;149270175;83013315;94410221;162417994                                                                                                                                                 | N-Term(iTRAQ4plex), N2(Deamidated), K4(iTRAQ4plex), M17(Oxidation)  | 2383.20737 | 42 | 41  | 4.20 | Expt2 |
| LPGGVOSFPOFSALR              | 1  | 146231996                                                                                                                                                                                                                                                                                                 | N-Term(iTRAQ4plex)                                                  | 1747.96709 | 42 |     |      | Expt2 |
| FAEAFEAIPIR                  | 5  | 126723461                                                                                                                                                                                                                                                                                                 | N-Term(iTRAQ4plex)                                                  | 1294.69255 | 42 | 45  | 4.07 | Expt2 |
| NGFSITGGFEFTR                | 5  | 171543883                                                                                                                                                                                                                                                                                                 | N-Term(iTRAQ4plex), N1(Deamidated)                                  | 1430.70439 | 42 | 45  | 3.77 | Expt2 |
| IEDFLER                      | 3  | 33504483                                                                                                                                                                                                                                                                                                  | N-Term(iTRAQ4plex)                                                  | 1065.57060 | 42 | 37  |      | Expt2 |
| VVLVLAGR                     | 13 | 149262383;82881899;20344851;94398829                                                                                                                                                                                                                                                                      | N-Term(iTRAQ4plex)                                                  | 970.65422  | 42 | 51  |      | Expt2 |
| VNSLPEVLPIILNSNEAK           | 7  | 31982236                                                                                                                                                                                                                                                                                                  | N-Term(iTRAQ4plex), K17(iTRAQ4plex)                                 | 2125.21872 | 42 | 49  | 4.26 | Expt2 |
| SVDEIIR                      | 3  | 94400195;149267887;6754976                                                                                                                                                                                                                                                                                | N-Term(iTRAQ4plex)                                                  | 975.56114  | 42 | 44  |      | Expt2 |
| IAVVGEGR                     | 4  | 6755995                                                                                                                                                                                                                                                                                                   | N-Term(iTRAQ4plex)                                                  | 944.56261  | 42 | 38  |      | Expt2 |
| ALLFVPR                      | 13 | 6754254                                                                                                                                                                                                                                                                                                   | N-Term(iTRAQ4plex)                                                  | 959.61559  | 42 | 34  |      | Expt2 |
| VGVNGFGR                     | 2  | 149248895;149249272;149249564;149249566;149250207;149251040;149251140;149251223;149251463;149251509;149251911;149252413;149257623;149258770;149258934;149259154;149259607;149259652;149259964;149260709;149260711;94387946;149260748;149263021;149265154;149266302;149266427;82996390;149272161;149274387 | N-Term(iTRAQ4plex), N4(Deamidated)                                  | 950.51872  | 42 | 34  |      | Expt2 |

|                            |    |                                                                                                                  |                                                      |            |    |    |  |      |       |
|----------------------------|----|------------------------------------------------------------------------------------------------------------------|------------------------------------------------------|------------|----|----|--|------|-------|
| LSIVPVR                    | 16 | 82890069;149253083;82898647;94383782;94383784;149259263;63594466;149263154;149265803;94401827;94402540;94404463  | N-Term(iTRAQ4plex)                                   | 927.61333  | 42 | 32 |  |      | Expt2 |
| GILTLK                     | 1  | 6671509;6752954;6671507;157823889;14192922;33563240;30425250                                                     | N-Term(iTRAQ4plex), K6(iTRAQ4plex)                   | 932.64830  | 42 |    |  |      | Expt2 |
| LAVVGGER                   | 1  | 149255232                                                                                                        | N-Term(iTRAQ4plex)                                   | 944.56261  | 42 |    |  |      | Expt2 |
| EVPESLR                    | 1  | 37537522                                                                                                         | N-Term(iTRAQ4plex)                                   | 973.54057  | 42 |    |  |      | Expt2 |
| ANLGGTEILPLCNIYK           | 7  | 225543183                                                                                                        | N-Term(iTRAQ4plex), C13(Methylthio), K17(iTRAQ4plex) | 2154.15630 | 42 | 74 |  | 4.40 | Expt2 |
| LVLRLRR                    | 8  | 169259776                                                                                                        | N-Term(iTRAQ4plex)                                   | 984.66893  | 42 | 24 |  |      | Expt2 |
| DVLMISLTPK                 | 7  | 149263750                                                                                                        | N-Term(iTRAQ4plex), K10(iTRAQ4plex)                  | 1404.84526 | 42 | 58 |  | 3.92 | Expt2 |
| APIIAVTR                   | 12 | 31981562                                                                                                         | N-Term(iTRAQ4plex)                                   | 984.63317  | 42 | 41 |  |      | Expt2 |
| NLMQLNMAK                  | 10 | 6680554                                                                                                          | N-Term(iTRAQ4plex), K9(iTRAQ4plex)                   | 1350.75884 | 42 | 61 |  | 4.53 | Expt2 |
| MYFPDVFEDIK                | 5  | 61743961                                                                                                         | N-Term(iTRAQ4plex), M1(Oxidation), K11(iTRAQ4plex)   | 1707.86064 | 42 | 51 |  | 3.44 | Expt2 |
| VVLVDR                     | 2  | 82950147;82950149;149264086                                                                                      | N-Term(iTRAQ4plex)                                   | 844.53838  | 42 | 30 |  |      | Expt2 |
| FNNLQOQVER                 | 8  | 112421039                                                                                                        | N-Term(iTRAQ4plex)                                   | 1378.71831 | 42 | 37 |  | 3.82 | Expt2 |
| WEPVPGAGPFR                | 4  | 115647999                                                                                                        | N-Term(iTRAQ4plex)                                   | 1356.71501 | 42 | 33 |  | 3.54 | Expt2 |
| AIIASNIMYIVGQYPR           | 5  | 38604071                                                                                                         | N-Term(iTRAQ4plex)                                   | 1953.08054 | 42 | 61 |  | 4.45 | Expt2 |
| AFSYYGPLR                  | 3  | 22122585                                                                                                         | N-Term(iTRAQ4plex)                                   | 1217.64604 | 42 | 40 |  |      | Expt2 |
| VIDFDENTALDDTEEGSFR        | 3  | 114205428                                                                                                        | N-Term(iTRAQ4plex)                                   | 2317.06638 | 42 | 38 |  | 3.93 | Expt2 |
| TGTOYLLR                   | 1  | 6678097                                                                                                          | N-Term(iTRAQ4plex)                                   | 1095.62712 | 42 |    |  |      | Expt2 |
| EVSQPDWTPPEVTLISLTK        | 9  | 86198316                                                                                                         | N-Term(iTRAQ4plex), K19(iTRAQ4plex)                  | 2412.29204 | 42 | 72 |  | 5.17 | Expt2 |
| VVIDAFR                    | 2  | 145966883                                                                                                        | N-Term(iTRAQ4plex)                                   | 963.57787  | 42 | 35 |  |      | Expt2 |
| SIVVIDPDTGR                | 10 | 112421039                                                                                                        | N-Term(iTRAQ4plex)                                   | 1315.73491 | 42 | 82 |  | 3.42 | Expt2 |
| YLECSALTQR                 | 8  | 18875380;45592934;6679601                                                                                        | N-Term(iTRAQ4plex), C4(Methylthio)                   | 1373.66765 | 42 | 45 |  |      | Expt2 |
| ILENGEAPGLGPSLDR           | 4  | 158937304                                                                                                        | N-Term(iTRAQ4plex), N4(Deamidated)                   | 1911.97844 | 42 | 93 |  | 4.56 | Expt2 |
| MLTYDPMMLFTGR              | 16 | 31560625                                                                                                         | N-Term(iTRAQ4plex), M1(Oxidation), M7(Oxidation)     | 1733.87651 | 42 | 68 |  |      | Expt2 |
| LFGTSPAEEVTPSPPEPAPALEAPAR | 3  | 112181302                                                                                                        | N-Term(iTRAQ4plex)                                   | 2717.43985 | 42 | 40 |  | 3.42 | Expt2 |
| LVTNNIFQPEVMER             | 2  | 54607112;54607114                                                                                                | N-Term(iTRAQ4plex)                                   | 1833.96855 | 42 | 56 |  |      | Expt2 |
| YPENFLLR                   | 1  | 161484668;31980772;94392631;13994195                                                                             | N-Term(iTRAQ4plex)                                   | 1342.72991 | 42 |    |  |      | Expt2 |
| VAMANIQPOLMLVAGATSIAR      | 6  | 31543942                                                                                                         | N-Term(iTRAQ4plex)                                   | 2186.19614 | 42 | 56 |  | 4.74 | Expt2 |
| YDMVTDSCSYTVAQVR           | 5  | 86439989                                                                                                         | N-Term(iTRAQ4plex), M3(Oxidation), C7(Methylthio)    | 1956.86643 | 42 | 52 |  | 4.38 | Expt2 |
| LLVSEDDYGR                 | 3  | 115496850                                                                                                        | N-Term(iTRAQ4plex)                                   | 1282.67803 | 42 | 35 |  | 3.46 | Expt2 |
| LGTDESCFNMLATR             | 3  | 160707958                                                                                                        | N-Term(iTRAQ4plex), C7(Methylthio), M10(Oxidation)   | 1876.87859 | 42 | 89 |  |      | Expt2 |
| EEPEAVLPGAQPTLISASISK      | 3  | 93102409                                                                                                         | N-Term(iTRAQ4plex), Q12(Deamidated), K21(iTRAQ4plex) | 2468.36368 | 42 | 51 |  | 4.48 | Expt2 |
| LIHIPPNNHIVGG              | 1  | 149233906;149271761;83003871;158517832                                                                           | N-Term(iTRAQ4plex)                                   | 1516.93572 | 42 |    |  |      | Expt2 |
| TLSDYNIQK                  | 3  | 9845265;149249766;149250554;149254469;149254584;94378076;82902501;149259705;149259811;149260017;82996161;6755919 | N-Term(iTRAQ4plex), K9(iTRAQ4plex)                   | 1369.76714 | 42 | 64 |  | 3.98 | Expt2 |
| DFLLQOTMLR                 | 2  | 165932331                                                                                                        | N-Term(iTRAQ4plex)                                   | 1408.77544 | 42 | 45 |  |      | Expt2 |
| AEATASALADADADLEER         | 6  | 21312151                                                                                                         | N-Term(iTRAQ4plex)                                   | 1962.94388 | 42 | 61 |  | 4.13 | Expt2 |
| DAIILIFANK                 | 6  | 6680724;29789263                                                                                                 | N-Term(iTRAQ4plex), K10(iTRAQ4plex)                  | 1405.87607 | 42 | 56 |  |      | Expt2 |
| LLIVSAPDPSNR               | 4  | 21703702                                                                                                         | N-Term(iTRAQ4plex)                                   | 1425.81792 | 42 | 67 |  | 3.51 | Expt2 |
| GNSLQEIILR                 | 3  | 19527028                                                                                                         | N-Term(iTRAQ4plex)                                   | 1302.71257 | 42 | 38 |  | 4.17 | Expt2 |
| ALVSSVR                    | 5  | 163310765                                                                                                        | N-Term(iTRAQ4plex)                                   | 875.54625  | 42 | 49 |  |      | Expt2 |
| VPFLPGSDLDQLTR             | 2  | 160333726                                                                                                        | N-Term(iTRAQ4plex)                                   | 1816.96477 | 42 | 36 |  |      | Expt2 |
| DAEDAMDAMDGAVLDR           | 6  | 6755478                                                                                                          | N-Term(iTRAQ4plex), M6(Oxidation)                    | 1911.81499 | 42 | 95 |  |      | Expt2 |
| PMFIVNTNVR                 | 2  | 6754696                                                                                                          | N-Term(iTRAQ4plex)                                   | 1431.79106 | 42 | 42 |  |      | Expt2 |
| LNIQPSSETDYAVDIR           | 4  | 236466498                                                                                                        | N-Term(iTRAQ4plex)                                   | 1877.97429 | 42 | 91 |  | 3.43 | Expt2 |
| WFWDFAIR                   | 1  | 160358829                                                                                                        | N-Term(iTRAQ4plex)                                   | 1272.62981 | 42 |    |  |      | Expt2 |
| LEMASLPDLTPTINK            | 3  | 113865981                                                                                                        | N-Term(iTRAQ4plex), K15(iTRAQ4plex)                  | 1931.07932 | 42 | 42 |  | 3.74 | Expt2 |
| TPSSDVLVFDYTK              | 8  | 47059484;157909799                                                                                               | N-Term(iTRAQ4plex), K13(iTRAQ4plex)                  | 1759.94145 | 42 | 89 |  | 4.58 | Expt2 |
| GICVADPYEIR                | 3  | 126518317                                                                                                        | N-Term(iTRAQ4plex), C3(Methylthio)                   | 1425.70281 | 42 | 37 |  | 3.69 | Expt2 |
| DYTGEDVTPENFLAVLR          | 7  | 7242187                                                                                                          | N-Term(iTRAQ4plex)                                   | 2083.04766 | 42 | 83 |  | 5.22 | Expt2 |
| YDGILPGK                   | 2  | 13385408;149251925;94386148;38082564;149269674                                                                   | N-Term(iTRAQ4plex), K9(iTRAQ4plex)                   | 1263.76201 | 42 | 46 |  |      | Expt2 |
| ILALAR                     | 3  | 9790069;6755084                                                                                                  | N-Term(iTRAQ4plex)                                   | 800.54857  | 41 | 29 |  |      | Expt2 |

|                                 |    |                                                                                                      |                                                                                     |            |    |    |  |      |       |
|---------------------------------|----|------------------------------------------------------------------------------------------------------|-------------------------------------------------------------------------------------|------------|----|----|--|------|-------|
| FMNSGQTCVADPYILCDPSIQNEIVEK     | 11 | 163310769                                                                                            | N-Term(iTRAQ4plex), M2(Oxidation), C8(Methylthio), C16(Methylthio), K27(iTRAQ4plex) | 3410.57151 | 41 | 46 |  | 5.16 | Expt2 |
| LLGATELPIVTPALR                 | 2  | 149250822;149250824                                                                                  | N-Term(iTRAQ4plex)                                                                  | 1708.05278 | 41 | 46 |  |      | Expt2 |
| NPFLAAVTTNR                     | 4  | 6679421                                                                                              | N-Term(iTRAQ4plex)                                                                  | 1347.75102 | 41 | 42 |  | 3.64 | Expt2 |
| QWELLEK                         | 2  | 115496850                                                                                            | N-Term(iTRAQ4plex), K8(iTRAQ4plex)                                                  | 1346.80205 | 41 | 38 |  |      | Expt2 |
| EISFAYEVLNSPEK                  | 5  | 9789937                                                                                              | N-Term(iTRAQ4plex), K14(iTRAQ4plex)                                                 | 1914.00969 | 41 | 66 |  | 4.24 | Expt2 |
| DFTPSGIAGAFR                    | 5  | 10181184                                                                                             | N-Term(iTRAQ4plex)                                                                  | 1382.71770 | 41 | 43 |  | 3.65 | Expt2 |
| LAQYYLVYQEPITPAQLVOR            | 6  | 134031994                                                                                            | N-Term(iTRAQ4plex)                                                                  | 2665.45786 | 41 | 63 |  | 5.82 | Expt2 |
| ILATGICR                        | 4  | 31560625                                                                                             | N-Term(iTRAQ4plex), C7(Methylthio)                                                  | 1036.57891 | 41 | 33 |  |      | Expt2 |
| QVQSLTCEVDALK                   | 4  | 31982755                                                                                             | N-Term(iTRAQ4plex), C7(Methylthio), K13(iTRAQ4plex)                                 | 1767.92522 | 41 | 82 |  | 5.17 | Expt2 |
| FLOPGSOR                        | 3  | 149259728;149259801;149260045;149260087;154350202;31981724;160298217                                 | N-Term(iTRAQ4plex)                                                                  | 1076.59880 | 41 | 35 |  |      | Expt2 |
| SLGGQAVQVR                      | 4  | 226246550;226246552                                                                                  | N-Term(iTRAQ4plex)                                                                  | 1158.67339 | 41 | 42 |  | 3.55 | Expt2 |
| EIVVLETLLEDIDK                  | 4  | 6677691                                                                                              | N-Term(iTRAQ4plex), K13(iTRAQ4plex)                                                 | 1804.02481 | 41 | 48 |  | 3.41 | Expt2 |
| ELEASEELDTICPK                  | 3  | 31981269                                                                                             | N-Term(iTRAQ4plex), C12(Methylthio), K14(iTRAQ4plex)                                | 1910.93003 | 41 | 52 |  | 3.60 | Expt2 |
| LELFLPEEYMAAPK                  | 3  | 18017605;149260581;149260615;149262987                                                               | N-Term(iTRAQ4plex), M11(Oxidation), K15(iTRAQ4plex)                                 | 2052.10307 | 41 | 51 |  |      | Expt2 |
| VVLVVLNR                        | 6  | 225690566                                                                                            | N-Term(iTRAQ4plex)                                                                  | 1119.70183 | 41 | 34 |  |      | Expt2 |
| VDILENQAMDTR                    | 15 | 82996105;149269937;6680121                                                                           | N-Term(iTRAQ4plex)                                                                  | 1548.78301 | 41 | 55 |  | 4.18 | Expt2 |
| TLIEILATR                       | 13 | 31981302;158966670                                                                                   | N-Term(iTRAQ4plex)                                                                  | 1173.73723 | 41 | 54 |  | 3.43 | Expt2 |
| YPPSPAK                         | 6  | 163310769                                                                                            | N-Term(iTRAQ4plex), K7(iTRAQ4plex)                                                  | 1047.61638 | 41 | 44 |  |      | Expt2 |
| LVEVDSCR                        | 3  | 188219589                                                                                            | N-Term(iTRAQ4plex)                                                                  | 1018.56755 | 41 | 40 |  |      | Expt2 |
| INLIAPPR                        | 4  | 13385624                                                                                             | N-Term(iTRAQ4plex)                                                                  | 1037.65410 | 41 | 37 |  |      | Expt2 |
| DVQEIFR                         | 2  | 9790069;38372907                                                                                     | N-Term(iTRAQ4plex)                                                                  | 1050.57231 | 41 | 34 |  |      | Expt2 |
| DIILPFR                         | 2  | 6753074                                                                                              | N-Term(iTRAQ4plex)                                                                  | 1017.62016 | 41 |    |  |      | Expt2 |
| IVLISGRR                        | 6  | 226371633                                                                                            | N-Term(iTRAQ4plex)                                                                  | 1057.68804 | 41 |    |  |      | Expt2 |
| LCAIPNLR                        | 1  | 163310765                                                                                            | N-Term(iTRAQ4plex), C2(Methylthio)                                                  | 1089.60820 | 41 |    |  |      | Expt2 |
| CTYLVLDEADR                     | 3  | 40068493;93587673;40068491                                                                           | N-Term(iTRAQ4plex), C1(Methylthio)                                                  | 1487.69988 | 41 | 47 |  | 3.92 | Expt2 |
| LGMTDAFGGR                      | 4  | 6678097;255759941                                                                                    | N-Term(iTRAQ4plex)                                                                  | 1168.59123 | 41 | 36 |  | 3.43 | Expt2 |
| DGIGDACDEDAGDGDILNEQDNCVLTNIDOR | 9  | 6755781                                                                                              | N-Term(iTRAQ4plex), C7(Methylthio), C23(Methylthio)                                 | 3666.51303 | 41 | 87 |  | 5.22 | Expt2 |
| QEIAEINR                        | 5  | 51092301;54607171;113195684                                                                          | N-Term(iTRAQ4plex)                                                                  | 1116.61601 | 41 | 38 |  |      | Expt2 |
| QGOYSPMAIEEQVAVIYAGVR           | 3  | 6680748                                                                                              | N-Term(iTRAQ4plex), M7(Oxidation)                                                   | 2469.26859 | 41 | 58 |  | 6.05 | Expt2 |
| FSVSPVVR                        | 4  | 149253258;33859482                                                                                   | N-Term(iTRAQ4plex)                                                                  | 1034.61406 | 41 | 48 |  |      | Expt2 |
| EAALNNEEVGADLEQVEVLQK           | 7  | 115496850                                                                                            | N-Term(iTRAQ4plex), K21(iTRAQ4plex)                                                 | 2573.36148 | 41 | 75 |  | 5.59 | Expt2 |
| IMGPEDEQMLLR                    | 1  | 114326446                                                                                            | N-Term(iTRAQ4plex), M2(Oxidation), M10(Oxidation)                                   | 1777.90080 | 41 |    |  |      | Expt2 |
| TLLGDPVPSLSDPASTSQPGSOSQAR      | 5  | 21704138;30039690                                                                                    | N-Term(iTRAQ4plex)                                                                  | 2827.42362 | 41 | 93 |  | 4.45 | Expt2 |
| ISMADVDLNVAAPK                  | 6  | 61743961                                                                                             | N-Term(iTRAQ4plex), K14(iTRAQ4plex)                                                 | 1731.96453 | 41 | 97 |  | 4.06 | Expt2 |
| ILLTEPPMNPTK                    | 15 | 22122825                                                                                             | N-Term(iTRAQ4plex), K12(iTRAQ4plex)                                                 | 1641.94902 | 41 | 82 |  | 4.45 | Expt2 |
| GAIVPAQEVPPPTVPMDYSWAR          | 3  | 29293809                                                                                             | N-Term(iTRAQ4plex)                                                                  | 2525.30655 | 41 | 38 |  |      | Expt2 |
| SPESQLFSIEDIEVVR                | 6  | 9790167                                                                                              | N-Term(iTRAQ4plex)                                                                  | 2021.02910 | 41 | 77 |  | 4.09 | Expt2 |
| DGNGYISAAELR                    | 3  | 6753244                                                                                              | N-Term(iTRAQ4plex), N3(Deamidated)                                                  | 1410.69963 | 41 | 62 |  | 4.10 | Expt2 |
| EQWANLEQLSAIR                   | 2  | 117938332;117938334                                                                                  | N-Term(iTRAQ4plex)                                                                  | 1701.90752 | 41 |    |  | 4.64 | Expt2 |
| LAMQEFMLPVGASSFR                | 3  | 149249466;149253386                                                                                  | N-Term(iTRAQ4plex), M7(Oxidation)                                                   | 2057.07598 | 41 | 78 |  |      | Expt2 |
| NOPPVDEGATGASQSLDR              | 5  | 6755438                                                                                              | N-Term(iTRAQ4plex)                                                                  | 2099.04448 | 41 | 76 |  | 3.98 | Expt2 |
| DMGVYTLDMTDENYR                 | 3  | 85719313;85719299;85719301;85719303                                                                  | N-Term(iTRAQ4plex)                                                                  | 1966.86600 | 41 | 48 |  | 3.66 | Expt2 |
| DYQELMNTK                       | 3  | 124487419                                                                                            | N-Term(iTRAQ4plex), K9(iTRAQ4plex)                                                  | 1429.72331 | 41 | 61 |  | 3.76 | Expt2 |
| VFLADQPIEAPPEPR                 | 7  | 110431378                                                                                            | N-Term(iTRAQ4plex)                                                                  | 1854.97281 | 41 | 56 |  | 4.78 | Expt2 |
| ALTSDFEEQR                      | 4  | 9937970;253795455;253795451                                                                          | N-Term(iTRAQ4plex)                                                                  | 1452.74419 | 41 | 77 |  | 3.99 | Expt2 |
| DAGQISGLNVLNR                   | 8  | 162461907                                                                                            | N-Term(iTRAQ4plex)                                                                  | 1386.78411 | 41 | 58 |  | 4.07 | Expt2 |
| LOYVEDGVYMQVASAR                | 4  | 62526118                                                                                             | N-Term(iTRAQ4plex)                                                                  | 2060.02439 | 41 | 55 |  | 3.80 | Expt2 |
| YENELTLR                        | 4  | 6754480;226823220                                                                                    | N-Term(iTRAQ4plex)                                                                  | 1181.62834 | 41 | 38 |  |      | Expt2 |
| ACGNFGIPCLER                    | 4  | 13385434                                                                                             | N-Term(iTRAQ4plex), C2(Methylthio), C9(Methylthio)                                  | 1515.66948 | 41 | 31 |  | 3.90 | Expt2 |
| DASVAEAWLLGOEPLYLSSR            | 5  | 117938332;117938334                                                                                  | N-Term(iTRAQ4plex)                                                                  | 2236.14493 | 41 | 63 |  | 4.67 | Expt2 |
| LAVNMVFPFR                      | 4  | 33859488;31981939;7106439;22165384;21746161;149253488;149253527;83030206;124430500;27754056;12963615 | N-Term(iTRAQ4plex), M5(Oxidation)                                                   | 1303.73564 | 41 | 35 |  |      | Expt2 |

|                         |    |                                                                               |                                                     |            |    |    |  |      |       |
|-------------------------|----|-------------------------------------------------------------------------------|-----------------------------------------------------|------------|----|----|--|------|-------|
| QWLQEIDR                | 2  | 6679587;21313162                                                              | N-Term(ITRAQ4plex)                                  | 1231.65618 | 41 |    |  |      | Expt2 |
| GGDLMAYDR               | 3  | 13384620                                                                      | N-Term(ITRAQ4plex)                                  | 1141.54277 | 41 | 33 |  |      | Expt2 |
| VAIEEPGPGGLAR           | 5  | 115647999                                                                     | N-Term(ITRAQ4plex)                                  | 1352.76494 | 41 | 47 |  | 3.89 | Expt2 |
| LLEEQTCEAASETR          | 3  | 31560394                                                                      | N-Term(ITRAQ4plex), C7(Methylthio)                  | 1769.81401 | 41 | 73 |  | 4.44 | Expt2 |
| IMMEFER                 | 1  | 21312151                                                                      | N-Term(ITRAQ4plex)                                  | 1099.53826 | 41 |    |  |      | Expt2 |
| WEEAIPLALK              | 6  | 116734870                                                                     | N-Term(ITRAQ4plex), K10(ITRAQ4plex)                 | 1457.85649 | 41 | 42 |  |      | Expt2 |
| FLSPSILR                | 1  | 31981509                                                                      | N-Term(ITRAQ4plex)                                  | 1076.65776 | 41 |    |  |      | Expt2 |
| VAASCGAIQYIPELDOVR      | 5  | 21703762                                                                      | N-Term(ITRAQ4plex), C5(Methylthio)                  | 2224.12278 | 41 | 52 |  | 4.18 | Expt2 |
| LGMPQFLSPEAQSLLR        | 5  | 22507357                                                                      | N-Term(ITRAQ4plex)                                  | 1931.05991 | 41 | 48 |  | 3.76 | Expt2 |
| DLALAIR                 | 15 | 110227377                                                                     | N-Term(ITRAQ4plex)                                  | 915.57671  | 41 | 40 |  |      | Expt2 |
| GDALDVYNGLSSQAQGFDFSVK  | 7  | 130502130                                                                     | N-Term(ITRAQ4plex), N8(Deamidated), K22(ITRAQ4plex) | 2607.29587 | 41 | 97 |  | 3.72 | Expt2 |
| AWALDIAELR              | 4  | 33413404                                                                      | N-Term(ITRAQ4plex)                                  | 1301.73735 | 41 | 50 |  | 4.17 | Expt2 |
| LLVPYLIEAVR             | 5  | 111038118                                                                     | N-Term(ITRAQ4plex)                                  | 1429.89348 | 41 | 46 |  | 3.55 | Expt2 |
| NIVEAAAVR               | 2  | 149259343;83030252;83030529;94392702;149267077                                | N-Term(ITRAQ4plex)                                  | 1086.64104 | 41 |    |  |      | Expt2 |
| NPYYGGESSITPLEELYK      | 3  | 33859560                                                                      | N-Term(ITRAQ4plex), K19(ITRAQ4plex)                 | 2435.22654 | 41 | 38 |  | 5.08 | Expt2 |
| STPEYFAER               | 4  | 31981302;158966670                                                            | N-Term(ITRAQ4plex)                                  | 1243.61223 | 41 | 34 |  | 3.40 | Expt2 |
| TSSAEMPTIPLGSAVEAIR     | 6  | 70608131                                                                      | N-Term(ITRAQ4plex)                                  | 2074.09892 | 41 | 64 |  | 4.06 | Expt2 |
| TPVEEVPAAIAPFQGR        | 10 | 19527174                                                                      | N-Term(ITRAQ4plex)                                  | 1825.99381 | 41 | 52 |  | 4.45 | Expt2 |
| CLGTVEVPGNFQGPDPYR      | 4  | 31982159                                                                      | N-Term(ITRAQ4plex)                                  | 1947.96855 | 41 | 59 |  | 4.35 | Expt2 |
| GIPLPTGDTSPPELLGDLPLPPK | 7  | 31980808                                                                      | N-Term(ITRAQ4plex), K25(ITRAQ4plex)                 | 2822.54972 | 41 | 36 |  | 5.02 | Expt2 |
| ILILER                  | 16 | 124249066;170671710;111185907;61098129                                        | N-Term(ITRAQ4plex)                                  | 900.60112  | 40 | 29 |  |      | Expt2 |
| LLLLQR                  | 14 | 94158950;111120342                                                            | N-Term(ITRAQ4plex), O5(Deamidated)                  | 900.60112  | 40 | 29 |  |      | Expt2 |
| LALDIEIATYR             | 4  | 47059013;84000448;196115327;14861854;31980832;269914154                       | N-Term(ITRAQ4plex)                                  | 1421.81389 | 40 | 42 |  | 3.48 | Expt2 |
| ILPVFDEPPNPTNVEESLK     | 4  | 8394460                                                                       | N-Term(ITRAQ4plex), K19(ITRAQ4plex)                 | 2426.30216 | 40 | 59 |  | 4.92 | Expt2 |
| NLDDGIDDER              | 4  | 6754972;31560656                                                              | N-Term(ITRAQ4plex)                                  | 1305.60723 | 40 | 54 |  |      | Expt2 |
| AALSYFPR                | 3  | 86439989                                                                      | N-Term(ITRAQ4plex)                                  | 1068.59685 | 40 | 38 |  |      | Expt2 |
| MLGADAVGMSTVPEVIVAR     | 3  | 149265958;183074535;7305395                                                   | N-Term(ITRAQ4plex), M1(Oxidation)                   | 2076.10141 | 40 | 48 |  |      | Expt2 |
| IAIWTTECENR             | 3  | 94370433;83627717                                                             | N-Term(ITRAQ4plex), C8(Methylthio)                  | 1525.72698 | 40 | 42 |  | 3.62 | Expt2 |
| VLITGATGLLGR            | 3  | 19527234                                                                      | N-Term(ITRAQ4plex)                                  | 1314.81877 | 40 | 33 |  | 3.75 | Expt2 |
| VVVLGLLPR               | 14 | 6679201                                                                       | N-Term(ITRAQ4plex)                                  | 1109.75298 | 40 | 39 |  |      | Expt2 |
| GDLOSQAMVR              | 1  | 226423922                                                                     | N-Term(ITRAQ4plex)                                  | 1248.65325 | 40 |    |  |      | Expt2 |
| GMSVYGLGR               | 3  | 149251847;21312564                                                            | N-Term(ITRAQ4plex)                                  | 1083.57402 | 40 | 42 |  |      | Expt2 |
| GFTIPEAFR               | 5  | 15617203                                                                      | N-Term(ITRAQ4plex)                                  | 1181.64324 | 40 | 42 |  |      | Expt2 |
| ALSVGLVR                | 1  | 6755210                                                                       | N-Term(ITRAQ4plex)                                  | 958.61595  | 40 |    |  |      | Expt2 |
| LLADOAEAR               | 7  | 149258488;226958653;226958657;82953132;149265207;149274550;149258392;82999755 | N-Term(ITRAQ4plex)                                  | 1130.63237 | 40 | 54 |  |      | Expt2 |
| FVSTSSSR                | 9  | 20911031                                                                      | N-Term(ITRAQ4plex)                                  | 1115.58342 | 40 | 52 |  |      | Expt2 |
| EVQDGIAPR               | 2  | 7305619                                                                       | N-Term(ITRAQ4plex)                                  | 1128.61308 | 40 | 47 |  |      | Expt2 |
| YPOLLSGIR               | 4  | 149267883                                                                     | N-Term(ITRAQ4plex)                                  | 1190.70049 | 40 | 45 |  |      | Expt2 |
| TLEDILFR                | 3  | 19527078                                                                      | N-Term(ITRAQ4plex)                                  | 1150.65715 | 40 | 43 |  |      | Expt2 |
| LNLDSIHGR               | 7  | 13994195                                                                      | N-Term(ITRAQ4plex)                                  | 1144.68303 | 40 | 43 |  | 3.82 | Expt2 |
| MEGFIVNR                | 11 | 13385466                                                                      | N-Term(ITRAQ4plex)                                  | 1109.59197 | 40 | 40 |  |      | Expt2 |
| GIVVYTGDR               | 2  | 21450277                                                                      | N-Term(ITRAQ4plex)                                  | 1123.62627 | 40 | 40 |  |      | Expt2 |
| LILPLGISSR              | 8  | 149251616                                                                     | N-Term(ITRAQ4plex)                                  | 1212.78240 | 40 | 40 |  |      | Expt2 |
| YQIELLR                 | 2  | 112421039                                                                     | N-Term(ITRAQ4plex)                                  | 1191.72356 | 40 | 40 |  |      | Expt2 |
| SLNLTAFR                | 3  | 19526463                                                                      | N-Term(ITRAQ4plex)                                  | 1178.70317 | 40 | 39 |  |      | Expt2 |
| CVNLPAGFR               | 10 | 6755781                                                                       | N-Term(ITRAQ4plex), C1(Methylthio)                  | 1166.59624 | 40 | 37 |  | 3.56 | Expt2 |
| YVIEFIAR                | 5  | 12963497;156231023;156231021                                                  | N-Term(ITRAQ4plex)                                  | 1154.66936 | 40 | 37 |  |      | Expt2 |
| IWDIGGQPR               | 4  | 13385518;23956194                                                             | N-Term(ITRAQ4plex)                                  | 1185.65276 | 40 | 36 |  |      | Expt2 |
| MDILSYMR                | 2  | 145275179;15011841                                                            | N-Term(ITRAQ4plex)                                  | 1172.59282 | 40 | 35 |  |      | Expt2 |
| LIFLNFVR                | 2  | 159110817                                                                     | N-Term(ITRAQ4plex)                                  | 1165.72148 | 40 | 34 |  |      | Expt2 |
| SWDIFFR                 | 2  | 85861164                                                                      | N-Term(ITRAQ4plex)                                  | 1114.58330 | 40 | 33 |  |      | Expt2 |
| LIEDFLAR                | 1  | 7304929                                                                       | N-Term(ITRAQ4plex)                                  | 1120.64910 | 40 |    |  |      | Expt2 |
| ALVEYSCR                | 4  | 33469047                                                                      | N-Term(ITRAQ4plex), C7(Methylthio)                  | 1130.54692 | 40 |    |  |      | Expt2 |



|                                |    |                                                                                           |                                                                    |            |    |    |      |      |       |
|--------------------------------|----|-------------------------------------------------------------------------------------------|--------------------------------------------------------------------|------------|----|----|------|------|-------|
| YPEAPPSVR                      | 1  | 42741690;31543918                                                                         | N-Term(iTRAQ4plex)                                                 | 1159.62700 | 40 |    |      |      | Expt2 |
| AVEPQPPFR                      | 1  | 45598390                                                                                  | N-Term(iTRAQ4plex)                                                 | 1184.65398 | 40 |    |      |      | Expt2 |
| AIAADPIAGK                     | 1  | 153792247                                                                                 | N-Term(iTRAQ4plex), K10(iTRAQ4plex)                                | 1214.73528 | 40 |    |      |      | Expt2 |
| QIQISIQQSIER                   | 3  | 82930015;149249829;149259613                                                              | N-Term(iTRAQ4plex)                                                 | 1601.87432 | 40 | 55 |      | 3.95 | Expt2 |
| LWTLVSEQTR                     | 5  | 82885753;82885877;94369475;943780<br>45;63572172;82933068;82995837                        | N-Term(iTRAQ4plex)                                                 | 1376.76726 | 40 | 48 |      | 3.88 | Expt2 |
| LYYFNGR                        | 38 | 160298217                                                                                 | N-Term(iTRAQ4plex), N5(Deamidated)                                 | 1077.54949 | 40 | 44 |      |      | Expt2 |
| YFLGDYVDR                      | 4  | 42415473;6679447;45592930                                                                 | N-Term(iTRAQ4plex)                                                 | 1404.73137 | 40 | 34 |      |      | Expt2 |
| TGTWSFLPTR                     | 2  | 160358825                                                                                 | N-Term(iTRAQ4plex), C10(Methylthio)                                | 1458.70024 | 40 |    |      | 3.58 | Expt2 |
| LTVDDIR                        | 2  | 6996917                                                                                   | N-Term(iTRAQ4plex)                                                 | 975.56078  | 40 | 34 |      |      | Expt2 |
| ELLTTMGDR                      | 5  | 21728376;71037403;198278553                                                               | N-Term(iTRAQ4plex)                                                 | 1179.61931 | 40 | 43 |      |      | Expt2 |
| TLIPDSYR                       | 1  | 225637487                                                                                 | N-Term(iTRAQ4plex)                                                 | 1108.61431 | 40 |    |      |      | Expt2 |
| NMMAACDPR                      | 9  | 33859488;31981939;7106439;2216538<br>4;21746161;149253488;149253527;277<br>54056;12963615 | N-Term(iTRAQ4plex), C6(Methylthio)                                 | 1198.49639 | 40 | 45 |      |      | Expt2 |
| DOVANSFVER                     | 5  | 6754254                                                                                   | N-Term(iTRAQ4plex)                                                 | 1379.70427 | 40 | 49 |      | 3.67 | Expt2 |
| TLEAENSR                       | 10 | 50363232                                                                                  | N-Term(iTRAQ4plex), N7(Deamidated)                                 | 1177.61719 | 40 | 50 |      |      | Expt2 |
| LYIDETVNDIPLNLR                | 4  | 33859809                                                                                  | N-Term(iTRAQ4plex)                                                 | 2046.10149 | 40 | 57 |      | 4.10 | Expt2 |
| YNVLGAETVLTOMR                 | 4  | 149270322;124487099                                                                       | N-Term(iTRAQ4plex), M13(Oxidation)                                 | 1754.92693 | 40 | 47 |      |      | Expt2 |
| AEAELCSEAEETR                  | 11 | 29336026                                                                                  | N-Term(iTRAQ4plex), C6(Methylthio)                                 | 1627.70635 | 40 | 55 |      | 4.96 | Expt2 |
| LAAAFVSR                       | 2  | 149249598;82886628;21704100                                                               | N-Term(iTRAQ4plex)                                                 | 1049.62126 | 40 | 35 |      |      | Expt2 |
| LNMEAINYMAADGDFK               | 4  | 6678682                                                                                   | N-Term(iTRAQ4plex), M3(Oxidation), K16(iTRAQ4plex)                 | 2107.01712 | 40 | 40 |      | 3.92 | Expt2 |
| ELDFLR                         | 1  | 112421039                                                                                 | N-Term(iTRAQ4plex)                                                 | 936.52593  | 40 |    |      |      | Expt2 |
| ELNFLR                         | 1  | 34328334                                                                                  | N-Term(iTRAQ4plex), N3(Deamidated)                                 | 936.52593  | 40 |    |      |      | Expt2 |
| QLDFLR                         | 1  | 149255868                                                                                 | N-Term(iTRAQ4plex), Q1(Deamidated)                                 | 936.52593  | 40 |    |      |      | Expt2 |
| ETSLLR                         | 1  | 145587080                                                                                 | N-Term(iTRAQ4plex)                                                 | 975.59570  | 40 |    |      |      | Expt2 |
| MWLLLR                         | 1  | 24962647                                                                                  | N-Term(iTRAQ4plex)                                                 | 975.59570  | 40 |    |      |      | Expt2 |
| AAMFPETLDEGMQIPSTQFDDAAHPTNVQR | 5  | 6671684                                                                                   | N-Term(iTRAQ4plex)                                                 | 3346.59848 | 40 | 54 |      | 4.96 | Expt2 |
| AIENDTLNLKSLFLGK               | 3  | 12963569                                                                                  | N-Term(iTRAQ4plex), K18(iTRAQ4plex)                                | 2279.27964 | 40 | 55 |      | 5.30 | Expt2 |
| STSLDVEPIYFTR                  | 3  | 61098078                                                                                  | N-Term(iTRAQ4plex)                                                 | 1671.87370 | 40 | 61 |      | 4.23 | Expt2 |
| VFYNIMR                        | 1  | 6753762                                                                                   | N-Term(iTRAQ4plex)                                                 | 1086.58830 | 40 |    |      |      | Expt2 |
| AISFVGSNOAGEYIFER              | 3  | 19527258                                                                                  | N-Term(iTRAQ4plex)                                                 | 2032.02776 | 40 | 72 |      | 4.34 | Expt2 |
| ELLASVTAPEK                    | 5  | 117606335                                                                                 | N-Term(iTRAQ4plex), K11(iTRAQ4plex)                                | 1445.85088 | 40 | 71 |      | 4.50 | Expt2 |
| SETDTSLIR                      | 2  | 6753324                                                                                   | N-Term(iTRAQ4plex)                                                 | 1165.61809 | 40 | 59 |      |      | Expt2 |
| ALQLEEFER                      | 4  | 149266483                                                                                 | N-Term(iTRAQ4plex)                                                 | 1131.61406 | 40 | 38 |      |      | Expt2 |
| VGDLYSDLR                      | 3  | 55926127                                                                                  | N-Term(iTRAQ4plex)                                                 | 1181.62859 | 40 | 37 |      |      | Expt2 |
| LLIQVGHEPMPPTLGTNLGR           | 2  | 9845273                                                                                   | N-Term(iTRAQ4plex)                                                 | 2386.34616 | 40 |    |      | 4.43 | Expt2 |
| ETQTEYEWTVDSK                  | 4  | 82950147;82950149;149264086                                                               | N-Term(iTRAQ4plex), K14(iTRAQ4plex)                                | 1990.94988 | 40 | 89 |      | 4.58 | Expt2 |
| LLEGEER                        | 2  | 188219589;9506843;113195686;16228<br>7370;161760667                                       | N-Term(iTRAQ4plex)                                                 | 1118.58183 | 40 | 38 |      |      | Expt2 |
| LLEGEQR                        | 2  | 149266991;13384908;31980832;74315<br>985                                                  | N-Term(iTRAQ4plex), Q7(Deamidated)                                 | 1118.58183 | 40 | 38 |      |      | Expt2 |
| DIVVAETLEDLKD                  | 5  | 188035858                                                                                 | N-Term(iTRAQ4plex), K13(iTRAQ4plex)                                | 1747.95609 | 40 | 66 |      | 3.60 | Expt2 |
| ELOVGIPVTDEAGQR                | 12 | 16716499                                                                                  | N-Term(iTRAQ4plex)                                                 | 1755.93767 | 40 | 55 |      | 3.84 | Expt2 |
| TDQVCINLR                      | 7  | 149261823;164607147                                                                       | N-Term(iTRAQ4plex), C5(Methylthio)                                 | 1251.63298 | 40 | 43 |      | 3.80 | Expt2 |
| AFFPCDFTPAVK                   | 6  | 227499103;227499234                                                                       | N-Term(iTRAQ4plex), C5(Methylthio), K12(iTRAQ4plex)                | 1676.84360 | 40 | 42 | 0.99 | 3.59 | Expt2 |
| MTVNESEQLVCSMDDTVR             | 3  | 6755995                                                                                   | N-Term(iTRAQ4plex), M1(Oxidation), C12(Methylthio), M14(Oxidation) | 2366.01725 | 40 | 59 |      | 4.33 | Expt2 |
| AENFFILR                       | 5  | 13386054                                                                                  | N-Term(iTRAQ4plex)                                                 | 1153.65215 | 40 | 41 |      |      | Expt2 |
| LTDCCVMR                       | 6  | 149274531;32880197;109134362                                                              | N-Term(iTRAQ4plex), C4(Methylthio)                                 | 1126.55554 | 40 | 45 |      |      | Expt2 |
| EVTQEVVR                       | 2  | 111185907                                                                                 | N-Term(iTRAQ4plex)                                                 | 1103.61833 | 40 | 39 |      |      | Expt2 |
| LVLPGMVER                      | 3  | 9789991                                                                                   | N-Term(iTRAQ4plex)                                                 | 1157.68279 | 40 | 34 |      |      | Expt2 |
| GLFIIDAK                       | 3  | 148747558                                                                                 | N-Term(iTRAQ4plex), K8(iTRAQ4plex)                                 | 1164.73442 | 40 | 55 |      | 3.42 | Expt2 |
| AAEQMSTLPIDAPSPLENLEQK         | 7  | 148747189                                                                                 | N-Term(iTRAQ4plex), K22(iTRAQ4plex)                                | 2670.39255 | 40 | 58 |      | 4.98 | Expt2 |
| SEIDLLDIR                      | 18 | 149254235;149265356;149265358;160<br>707925;160707921                                     | N-Term(iTRAQ4plex)                                                 | 1217.68840 | 40 | 44 |      | 3.47 | Expt2 |
| GIGFAITR                       | 8  | 82975294;27413160;113680352                                                               | N-Term(iTRAQ4plex)                                                 | 978.58489  | 40 | 47 |      |      | Expt2 |
| DLTEYLSR                       | 2  | 148664250                                                                                 | N-Term(iTRAQ4plex)                                                 | 1140.60369 | 40 | 37 |      |      | Expt2 |
| VGAIPANALDDGOWSQGLISAAR        | 3  | 227116327                                                                                 | N-Term(iTRAQ4plex)                                                 | 2454.28507 | 40 | 62 |      | 4.32 | Expt2 |

|                           |    |                                                                                                                                                                                    |                                                    |            |    |     |      |       |
|---------------------------|----|------------------------------------------------------------------------------------------------------------------------------------------------------------------------------------|----------------------------------------------------|------------|----|-----|------|-------|
| TTSGATPAAIR               | 2  | 110227377                                                                                                                                                                          | N-Term(iTRAQ4plex)                                 | 1189.66960 | 40 | 39  |      | Expt2 |
| YIVNVYQISEEGK             | 6  | 46849812                                                                                                                                                                           | N-Term(iTRAQ4plex), K13(iTRAQ4plex)                | 1829.99431 | 40 | 101 | 4.41 | Expt2 |
| LTDQVMQNPQVLAALQER        | 5  | 6679012                                                                                                                                                                            | N-Term(iTRAQ4plex), M6(Oxidation)                  | 2214.17209 | 40 | 58  | 4.11 | Expt2 |
| FYEQMNGPVTSGSR            | 3  | 56699438;54287684                                                                                                                                                                  | N-Term(iTRAQ4plex), N6(Deamidated)                 | 1717.79741 | 40 | 67  | 4.06 | Expt2 |
| ILPPRWDR                  | 1  | 28316794                                                                                                                                                                           | N-Term(iTRAQ4plex)                                 | 1196.68938 | 40 |     |      | Expt2 |
| DSPSVWAAPVPGK             | 6  | 6755040                                                                                                                                                                            | N-Term(iTRAQ4plex), K12(iTRAQ4plex)                | 1501.83049 | 40 | 51  | 4.51 | Expt2 |
| TVAVITSDGR                | 2  | 19527156                                                                                                                                                                           | N-Term(iTRAQ4plex)                                 | 1162.65569 | 40 | 42  |      | Expt2 |
| EGETYDDVAVVDPVTR          | 3  | 236466498                                                                                                                                                                          | N-Term(iTRAQ4plex)                                 | 2056.03855 | 40 | 35  | 3.75 | Expt2 |
| YSFLQDFPAPR               | 5  | 8394024;149258657;9506983                                                                                                                                                          | N-Term(iTRAQ4plex)                                 | 1484.76331 | 40 | 44  | 4.33 | Expt2 |
| LFFDTER                   | 2  | 110626070                                                                                                                                                                          | N-Term(iTRAQ4plex)                                 | 1071.55998 | 40 |     |      | Expt2 |
| IIGYTPDLDPETVDDAFAR       | 9  | 6678902                                                                                                                                                                            | N-Term(iTRAQ4plex)                                 | 2252.13150 | 40 | 60  | 3.72 | Expt2 |
| EHDVPLDR                  | 3  | 6678467                                                                                                                                                                            | N-Term(iTRAQ4plex)                                 | 1213.69353 | 40 | 36  |      | Expt2 |
| VATAQDDITGDGTTSNVLIIGELLK | 3  | 6753324                                                                                                                                                                            | N-Term(iTRAQ4plex), K25(iTRAQ4plex)                | 2832.54746 | 39 | 55  | 4.43 | Expt2 |
| IDLPEYQGEPEDEISIQK        | 4  | 31982664                                                                                                                                                                           | N-Term(iTRAQ4plex), K17(iTRAQ4plex)                | 2262.17905 | 39 | 48  | 3.85 | Expt2 |
| AAELQAOQWER               | 3  | 55926127                                                                                                                                                                           | N-Term(iTRAQ4plex)                                 | 1345.70183 | 39 | 32  | 3.60 | Expt2 |
| ALLTPVAIAAGR              | 5  | 149258655;160298213                                                                                                                                                                | N-Term(iTRAQ4plex)                                 | 1296.81499 | 39 | 58  | 0.99 | Expt2 |
| IALTDNSLIAR               | 8  | 31981515                                                                                                                                                                           | N-Term(iTRAQ4plex)                                 | 1330.78191 | 39 | 55  | 3.82 | Expt2 |
| YLVLEADR                  | 4  | 25141235;225007636;6753620;14861844;33859536                                                                                                                                       | N-Term(iTRAQ4plex)                                 | 1237.65935 | 39 | 53  |      | Expt2 |
| SPCEAPDGLR                | 3  | 27734136                                                                                                                                                                           | N-Term(iTRAQ4plex), C3(Methylthio)                 | 1234.57170 | 39 | 49  |      | Expt2 |
| LINLVGESLR                | 2  | 33147082                                                                                                                                                                           | N-Term(iTRAQ4plex)                                 | 1257.76653 | 39 | 49  |      | Expt2 |
| DFYGEDAK                  | 4  | 163310769                                                                                                                                                                          | N-Term(iTRAQ4plex), K8(iTRAQ4plex)                 | 1232.61260 | 39 | 48  |      | Expt2 |
| MVLPDVGPR                 | 6  | 111185907                                                                                                                                                                          | N-Term(iTRAQ4plex)                                 | 1224.68828 | 39 | 46  |      | Expt2 |
| LLLPWLEAR                 | 9  | 51491845                                                                                                                                                                           | N-Term(iTRAQ4plex)                                 | 1254.77251 | 39 | 45  |      | Expt2 |
| FVSGPPQVIR                | 3  | 158854020;158854022                                                                                                                                                                | N-Term(iTRAQ4plex)                                 | 1243.72905 | 39 | 42  |      | Expt2 |
| LLIDDOVLR                 | 4  | 226423935                                                                                                                                                                          | N-Term(iTRAQ4plex)                                 | 1228.73967 | 39 | 41  |      | Expt2 |
| EAESSPFVER                | 5  | 6755863                                                                                                                                                                            | N-Term(iTRAQ4plex)                                 | 1294.64116 | 39 | 41  | 3.66 | Expt2 |
| VLVSGFPAGLR               | 3  | 21312544                                                                                                                                                                           | N-Term(iTRAQ4plex)                                 | 1259.75871 | 39 | 40  |      | Expt2 |
| LVLGDNSLAIR               | 2  | 160298209                                                                                                                                                                          | N-Term(iTRAQ4plex)                                 | 1314.78459 | 39 | 37  |      | Expt2 |
| ITDLYTDLR                 | 3  | 117938332;117938334                                                                                                                                                                | N-Term(iTRAQ4plex)                                 | 1253.68682 | 39 | 35  |      | Expt2 |
| DIVENYFMR                 | 3  | 170295840                                                                                                                                                                          | N-Term(iTRAQ4plex)                                 | 1330.65813 | 39 | 35  |      | Expt2 |
| IFVWDWOR                  | 2  | 149251616;9507079                                                                                                                                                                  | N-Term(iTRAQ4plex)                                 | 1293.68804 | 39 | 34  |      | Expt2 |
| VVQALDPLGSR               | 2  | 31657132                                                                                                                                                                           | N-Term(iTRAQ4plex)                                 | 1298.75701 | 39 | 34  |      | Expt2 |
| DGQILPVPNVVVR             | 2  | 149253208;33239431                                                                                                                                                                 | N-Term(iTRAQ4plex)                                 | 1549.91741 | 39 |     | 3.46 | Expt2 |
| WIVNLIR                   | 1  | 45476573                                                                                                                                                                           | N-Term(iTRAQ4plex)                                 | 1057.66362 | 39 |     |      | Expt2 |
| VLIEGSINSVR               | 5  | 13386054                                                                                                                                                                           | N-Term(iTRAQ4plex)                                 | 1330.78264 | 39 | 68  | 3.74 | Expt2 |
| ITVPFLEQCPPIR             | 3  | 6755152                                                                                                                                                                            | N-Term(iTRAQ4plex), C9(Methylthio)                 | 1605.86626 | 39 | 62  |      | Expt2 |
| ACDLLDAR                  | 2  | 160415215                                                                                                                                                                          | N-Term(iTRAQ4plex), C2(Methylthio)                 | 1066.51360 | 39 | 42  |      | Expt2 |
| VTTMDAELEFAIQNPNTGK       | 3  | 149266483;157277952;70778915;157277948                                                                                                                                             | N-Term(iTRAQ4plex), K19(iTRAQ4plex)                | 2354.22342 | 39 | 55  | 4.77 | Expt2 |
| YLLLAGAPR                 | 3  | 7305189                                                                                                                                                                            | N-Term(iTRAQ4plex)                                 | 1117.68498 | 39 | 47  |      | Expt2 |
| ADQIETQOLMR               | 6  | 215983062;7106303                                                                                                                                                                  | N-Term(iTRAQ4plex)                                 | 1476.76482 | 39 | 47  | 3.69 | Expt2 |
| WGTLTDCVVMR               | 5  | 82801284;94371439;149252089;82918363;82918359;82954743;149266199;82954739;149266543;149266545;82956957;51769129;149266569;82957137;94400765;149268214;149268216;37674277;157277969 | N-Term(iTRAQ4plex), C7(Methylthio), M10(Oxidation) | 1486.69974 | 39 | 42  |      | Expt2 |
| GAEMETVIVDVMR             | 4  | 55741460                                                                                                                                                                           | N-Term(iTRAQ4plex), M5(Oxidation), M14(Oxidation)  | 1851.89865 | 39 | 36  | 3.63 | Expt2 |
| VNLOGDIVDR                | 2  | 156255173;7304861;156255171                                                                                                                                                        | N-Term(iTRAQ4plex)                                 | 1272.70708 | 39 | 33  |      | Expt2 |
| FMEQVIFK                  | 3  | 23956222                                                                                                                                                                           | N-Term(iTRAQ4plex), K8(iTRAQ4plex)                 | 1329.74980 | 39 | 45  |      | Expt2 |
| LMDVGLIAIR                | 5  | 14389431                                                                                                                                                                           | N-Term(iTRAQ4plex)                                 | 1244.75456 | 39 | 53  | 3.51 | Expt2 |
| ASALATIGPTELITSEVTAR      | 5  | 226423922                                                                                                                                                                          | N-Term(iTRAQ4plex)                                 | 2242.25022 | 39 | 75  | 4.45 | Expt2 |
| NFLVLDRAR                 | 17 | 82932654                                                                                                                                                                           | N-Term(iTRAQ4plex), N1(Deamidated)                 | 1248.70976 | 39 | 36  |      | Expt2 |
| LAQDPFLYPGELLEK           | 2  | 239052674                                                                                                                                                                          | N-Term(iTRAQ4plex), K16(iTRAQ4plex)                | 2118.17575 | 39 |     | 4.25 | Expt2 |
| GAQVEEIIWSLEPESFEK        | 3  | 229577281;229577283                                                                                                                                                                | N-Term(iTRAQ4plex), K17(iTRAQ4plex)                | 2266.15647 | 39 | 45  | 4.12 | Expt2 |
| DLLSSVSR                  | 4  | 160707958                                                                                                                                                                          | N-Term(iTRAQ4plex)                                 | 1020.58238 | 39 | 41  |      | Expt2 |

|                             |    |                                                                                              |                                                                      |            |    |     |      |       |
|-----------------------------|----|----------------------------------------------------------------------------------------------|----------------------------------------------------------------------|------------|----|-----|------|-------|
| VMLYPSR                     | 1  | 149245460;149256551;149257048;149260560;149263341;149267317                                  | N-Term(iTRAQ4plex)                                                   | 1009.56041 | 39 |     |      | Expt2 |
| AIGAVPLIQGEYMIPECK          | 1  | 6753556                                                                                      | N-Term(iTRAQ4plex), M13(Oxidation), C16(Methylthio), K18(iTRAQ4plex) | 2282.19175 | 39 |     |      | Expt2 |
| YHWPVWVPEGSTSDTQEQAILR      | 5  | 34996495                                                                                     | N-Term(iTRAQ4plex)                                                   | 2668.41281 | 39 | 79  | 4.69 | Expt2 |
| ELPNAQNVYVR                 | 5  | 31560737                                                                                     | N-Term(iTRAQ4plex)                                                   | 1446.78362 | 39 | 44  | 3.76 | Expt2 |
| SSLNPILFR                   | 3  | 46195798                                                                                     | N-Term(iTRAQ4plex)                                                   | 1190.70207 | 39 | 38  | 3.52 | Expt2 |
| NFDEILR                     | 3  | 28916703;6671549                                                                             | N-Term(iTRAQ4plex)                                                   | 1050.57349 | 39 | 43  |      | Expt2 |
| NAFACFDEEAIGTIQEDYLR        | 3  | 71037403                                                                                     | N-Term(iTRAQ4plex), C5(Methylthio)                                   | 2495.13828 | 39 | 65  | 4.37 | Expt2 |
| GVEICIAIPGR                 | 2  | 40068493;93587673;40068491;83816893                                                          | N-Term(iTRAQ4plex), C5(Methylthio)                                   | 1305.67778 | 39 | 34  |      | Expt2 |
| VWEILNR                     | 1  | 111185907                                                                                    | N-Term(iTRAQ4plex)                                                   | 1073.62432 | 39 |     |      | Expt2 |
| DSTYSMSSTLTLTK              | 3  | 149255637;149255639;149255641                                                                | N-Term(iTRAQ4plex), K14(iTRAQ4plex)                                  | 1822.94023 | 39 | 84  | 4.02 | Expt2 |
| EASMVITESPAALQLR            | 5  | 7710018                                                                                      | N-Term(iTRAQ4plex)                                                   | 1860.00730 | 39 | 54  | 3.87 | Expt2 |
| VTYVDFLAYDILDQYR            | 6  | 33468899;6754084                                                                             | N-Term(iTRAQ4plex)                                                   | 2138.09726 | 39 | 63  | 4.60 | Expt2 |
| SSEMNVLIPTTEGGDFNEFPVPEQFK  | 6  | 157951604                                                                                    | N-Term(iTRAQ4plex), M4(Oxidation), K25(iTRAQ4plex)                   | 3115.52744 | 39 | 49  | 4.60 | Expt2 |
| YSMYLTPK                    | 2  | 160333881                                                                                    | N-Term(iTRAQ4plex), K8(iTRAQ4plex)                                   | 1290.70915 | 39 | 41  |      | Expt2 |
| VEFLEOMR                    | 3  | 13385384                                                                                     | N-Term(iTRAQ4plex)                                                   | 1308.71135 | 39 | 37  | 3.56 | Expt2 |
| LVEEAIQCAEK                 | 4  | 29789289                                                                                     | N-Term(iTRAQ4plex), C8(Methylthio), K11(iTRAQ4plex)                  | 1566.81499 | 39 | 77  | 3.69 | Expt2 |
| LQAEGLSPR                   | 2  | 113680352                                                                                    | N-Term(iTRAQ4plex)                                                   | 1114.63481 | 39 | 44  |      | Expt2 |
| QAQVATGGGPGAPPSQPDYSAAWAEYR | 3  | 163954948                                                                                    | N-Term(iTRAQ4plex)                                                   | 3096.46030 | 39 | 66  | 5.27 | Expt2 |
| YTMGDAPDFDR                 | 3  | 6754084                                                                                      | N-Term(iTRAQ4plex)                                                   | 1431.63384 | 39 | 43  | 3.65 | Expt2 |
| LVDAGIESR                   | 3  | 115647999                                                                                    | N-Term(iTRAQ4plex)                                                   | 1103.61626 | 39 | 36  |      | Expt2 |
| EIEIPLQR                    | 2  | 31980942                                                                                     | N-Term(iTRAQ4plex)                                                   | 1254.75505 | 39 | 32  |      | Expt2 |
| GGYIGSTYFER                 | 4  | 21704162;270309117                                                                           | N-Term(iTRAQ4plex)                                                   | 1393.68950 | 39 | 60  | 3.41 | Expt2 |
| FTSQPGYGR                   | 5  | 33469047                                                                                     | N-Term(iTRAQ4plex)                                                   | 1269.67119 | 39 | 41  | 3.72 | Expt2 |
| NLLDVIDQAR                  | 1  | 194353972                                                                                    | N-Term(iTRAQ4plex)                                                   | 1300.73406 | 39 |     |      | Expt2 |
| IQIAPDSGGLPER               | 2  | 84662730                                                                                     | N-Term(iTRAQ4plex)                                                   | 1496.81938 | 39 |     |      | Expt2 |
| FQSLGVAFYR                  | 7  | 148747526                                                                                    | N-Term(iTRAQ4plex)                                                   | 1331.72453 | 39 | 48  | 3.91 | Expt2 |
| SYQSELEALR                  | 2  | 112421039                                                                                    | N-Term(iTRAQ4plex)                                                   | 1339.69829 | 39 |     | 4.34 | Expt2 |
| EVAGOVGVLQDLMLVR            | 12 | 161016822;161016820                                                                          | N-Term(iTRAQ4plex), M14(Oxidation)                                   | 1871.02580 | 39 | 62  | 3.92 | Expt2 |
| ITLFPDVFYADK                | 8  | 70778976                                                                                     | N-Term(iTRAQ4plex), K12(iTRAQ4plex)                                  | 1606.93511 | 39 | 87  | 3.67 | Expt2 |
| VMTIPYQMPASSPVICAGGDR       | 5  | 6754994                                                                                      | N-Term(iTRAQ4plex), M2(Oxidation), M9(Oxidation), C17(Methylthio)    | 2640.25028 | 39 | 45  | 3.99 | Expt2 |
| TLENLTPDTK                  | 2  | 111074529                                                                                    | N-Term(iTRAQ4plex), K10(iTRAQ4plex)                                  | 1419.79534 | 39 |     | 3.76 | Expt2 |
| MNGLLLNDR                   | 1  | 149261934                                                                                    | N-Term(iTRAQ4plex), N2(Deamidated)                                   | 1190.61858 | 39 |     |      | Expt2 |
| GFVFITFK                    | 2  | 146260280;6754222                                                                            | N-Term(iTRAQ4plex), K8(iTRAQ4plex)                                   | 1246.75371 | 39 | 45  |      | Expt2 |
| LTEMETMSQLMAEK              | 3  | 114326446                                                                                    | N-Term(iTRAQ4plex), M12(Oxidation), K15(iTRAQ4plex)                  | 2074.01621 | 39 | 42  | 4.57 | Expt2 |
| ILODSLGGNCR                 | 3  | 45433560;40254635;61657921                                                                   | N-Term(iTRAQ4plex), C10(Methylthio)                                  | 1365.67217 | 39 | 41  | 3.80 | Expt2 |
| LTLYLLEGR                   | 5  | 115647999                                                                                    | N-Term(iTRAQ4plex)                                                   | 1322.77873 | 39 | 46  |      | Expt2 |
| WISIMTER                    | 5  | 149260099;6996913                                                                            | N-Term(iTRAQ4plex)                                                   | 1179.63110 | 39 | 41  |      | Expt2 |
| DFQYVEYGEDFPASPQR           | 12 | 22122795                                                                                     | N-Term(iTRAQ4plex)                                                   | 2255.04302 | 39 | 61  | 4.44 | Expt2 |
| IYVISLAEPK                  | 6  | 211065507                                                                                    | N-Term(iTRAQ4plex)                                                   | 1304.77117 | 39 | 53  |      | Expt2 |
| LLIAAR                      | 18 | 149251929;63514363;82905443;51766344;149264394;51770420;82994829;149270876;91932791;10946684 | N-Term(iTRAQ4plex)                                                   | 800.54881  | 39 | 33  |      | Expt2 |
| VSNGAGSMSVSLVADENPFAOQALR   | 7  | 28916693                                                                                     | N-Term(iTRAQ4plex), N3(Deamidated), M8(Oxidation)                    | 2638.29050 | 39 | 104 | 6.23 | Expt2 |
| RLPIGSYF                    | 1  | 6679166                                                                                      | N-Term(iTRAQ4plex)                                                   | 1096.62834 | 39 |     |      | Expt2 |
| VMGPNFGYVTR                 | 5  | 156938252                                                                                    | N-Term(iTRAQ4plex)                                                   | 1384.71831 | 39 | 60  | 3.75 | Expt2 |
| SPLAOMEER                   | 4  | 28173550                                                                                     | N-Term(iTRAQ4plex)                                                   | 1333.65227 | 39 | 59  | 3.70 | Expt2 |
| SOCTOVQOER                  | 6  | 82950147;82950149;149264086                                                                  | N-Term(iTRAQ4plex), C3(Methylthio)                                   | 1367.65459 | 39 | 52  | 3.83 | Expt2 |
| GCVQDETCTR                  | 6  | 19526946                                                                                     | N-Term(iTRAQ4plex), C2(Methylthio), C8(Methylthio)                   | 1347.52873 | 39 | 44  | 3.73 | Expt2 |
| VDTVTEOTGLSGR               | 2  | 33859722                                                                                     | N-Term(iTRAQ4plex)                                                   | 1405.74443 | 39 | 44  |      | Expt2 |
| WDVTOEPYNR                  | 2  | 167736365                                                                                    | N-Term(iTRAQ4plex)                                                   | 1451.70500 | 39 | 31  |      | Expt2 |
| FASCFYGPFR                  | 2  | 149252624;34328485                                                                           | N-Term(iTRAQ4plex), C4(Methylthio)                                   | 1384.63103 | 39 |     | 3.82 | Expt2 |
| YEIQEEGAVR                  | 1  | 170763522                                                                                    | N-Term(iTRAQ4plex), Q3(Deamidated)                                   | 1338.68157 | 39 |     |      | Expt2 |
| AVLVSNEPMEGAFNVOTR          | 3  | 118601068                                                                                    | N-Term(iTRAQ4plex), M9(Oxidation)                                    | 2349.14225 | 39 | 51  | 3.79 | Expt2 |
| EIAEYDVLSDPR                | 3  | 9055242                                                                                      | N-Term(iTRAQ4plex)                                                   | 1621.82182 | 39 | 75  | 3.93 | Expt2 |

|                               |   |                                                                                      |                                                                       |            |    |     |  |      |       |
|-------------------------------|---|--------------------------------------------------------------------------------------|-----------------------------------------------------------------------|------------|----|-----|--|------|-------|
| APITGYIIR                     | 1 | 46849812                                                                             | N-Term(iTRAQ4plex)                                                    | 1147.69328 | 39 |     |  |      | Expt2 |
| ELLAQFSSGSLTLPMLK             | 3 | 37537522                                                                             | N-Term(iTRAQ4plex), K17(iTRAQ4plex)                                   | 2123.20548 | 39 | 66  |  | 5.09 | Expt2 |
| ELDLPEELVSR                   | 2 | 85861218                                                                             | N-Term(iTRAQ4plex)                                                    | 1443.78154 | 39 | 49  |  |      | Expt2 |
| YPLDIAELLR                    | 2 | 161016833                                                                            | N-Term(iTRAQ4plex)                                                    | 1346.78411 | 39 | 43  |  |      | Expt2 |
| DSDGQVFGALASEPFFK             | 5 | 194328704;194328702;194328706;18700026;194328708                                     | N-Term(iTRAQ4plex), K16(iTRAQ4plex)                                   | 1956.00144 | 39 | 47  |  | 4.10 | Expt2 |
| EAEELLEPLPAIR                 | 3 | 15426055                                                                             | N-Term(iTRAQ4plex)                                                    | 1625.90544 | 39 | 40  |  | 3.50 | Expt2 |
| WTGMIIIPPR                    | 4 | 149251440;42741690;31543918;226823223                                                | N-Term(iTRAQ4plex)                                                    | 1271.70769 | 39 | 37  |  |      | Expt2 |
| GCPAALPLSNLYETMGVVGSTTTQLYTDR | 6 | 6678321                                                                              | N-Term(iTRAQ4plex), C2(Methylthio), M15(Oxidation)                    | 3264.57492 | 39 | 110 |  | 5.41 | Expt2 |
| ACGLNFADLMGR                  | 3 | 33859662                                                                             | N-Term(iTRAQ4plex), C2(Methylthio)                                    | 1457.68242 | 39 | 43  |  | 4.60 | Expt2 |
| MLEQLDMR                      | 2 | 9790069;38372907                                                                     | N-Term(iTRAQ4plex)                                                    | 1179.59941 | 39 | 38  |  |      | Expt2 |
| TLPSSGPQNLR                   | 2 | 226423922                                                                            | N-Term(iTRAQ4plex)                                                    | 1313.73052 | 39 | 38  |  |      | Expt2 |
| TNLLQVCER                     | 1 | 31543942                                                                             | N-Term(iTRAQ4plex), C7(Methylthio)                                    | 1265.64678 | 39 |     |  |      | Expt2 |
| EYELLASVR                     | 6 | 31657132                                                                             | N-Term(iTRAQ4plex)                                                    | 1352.71733 | 39 | 58  |  | 4.09 | Expt2 |
| FYGPAGPYGIFAGR                | 3 | 226442772                                                                            | N-Term(iTRAQ4plex)                                                    | 1616.83611 | 39 | 42  |  | 4.16 | Expt2 |
| LFLSYDYAVR                    | 1 | 13385294                                                                             | N-Term(iTRAQ4plex)                                                    | 1390.75554 | 39 |     |  |      | Expt2 |
| TNVYISSAGAR                   | 2 | 110625645                                                                            | N-Term(iTRAQ4plex)                                                    | 1369.72356 | 39 | 40  |  |      | Expt2 |
| GECQSEGVLFQGNR                | 3 | 160358829                                                                            | N-Term(iTRAQ4plex), C3(Methylthio)                                    | 1860.84746 | 39 | 40  |  | 3.48 | Expt2 |
| QAEAMALLAEER                  | 3 | 13385392                                                                             | N-Term(iTRAQ4plex)                                                    | 1546.80156 | 39 | 52  |  | 4.63 | Expt2 |
| SDPFEFFR                      | 3 | 25141330                                                                             | N-Term(iTRAQ4plex)                                                    | 1301.66741 | 39 | 36  |  |      | Expt2 |
| TEVETVLSVR                    | 2 | 61102728                                                                             | N-Term(iTRAQ4plex)                                                    | 1423.79228 | 39 | 47  |  |      | Expt2 |
| IDVVVNNAGILR                  | 2 | 31982273                                                                             | N-Term(iTRAQ4plex)                                                    | 1426.85625 | 39 | 44  |  |      | Expt2 |
| ICDIAEELAR                    | 3 | 29789199                                                                             | N-Term(iTRAQ4plex), C2(Methylthio)                                    | 1264.65154 | 39 | 37  |  |      | Expt2 |
| SFSTVPYIVGINK                 | 6 | 117553604                                                                            | N-Term(iTRAQ4plex), K13(iTRAQ4plex)                                   | 1712.98931 | 38 | 62  |  | 3.48 | Expt2 |
| LSGTGSAGATIR                  | 3 | 227330633                                                                            | N-Term(iTRAQ4plex)                                                    | 1234.68999 | 38 | 38  |  | 3.59 | Expt2 |
| SGYQALPWVR                    | 2 | 160333502;6671557;160333508                                                          | N-Term(iTRAQ4plex)                                                    | 1320.71733 | 38 | 35  |  |      | Expt2 |
| LEEFFAR                       | 1 | 6996917                                                                              | N-Term(iTRAQ4plex)                                                    | 1055.56597 | 38 |     |  |      | Expt2 |
| MTICGLER                      | 1 | 27597069                                                                             | N-Term(iTRAQ4plex), C4(Methylthio)                                    | 1225.62212 | 38 |     |  |      | Expt2 |
| IMGIPEDQMGLLR                 | 6 | 114326446                                                                            | N-Term(iTRAQ4plex), M10(Oxidation)                                    | 1761.90618 | 38 | 46  |  | 3.84 | Expt2 |
| FEELTNLIR                     | 2 | 149274605;22203755                                                                   | N-Term(iTRAQ4plex)                                                    | 1278.71709 | 38 |     |  | 3.83 | Expt2 |
| MALLMAEMSR                    | 2 | 31543942                                                                             | N-Term(iTRAQ4plex)                                                    | 1296.65825 | 38 | 32  |  |      | Expt2 |
| FDAMPFTLR                     | 1 | 6755100                                                                              | N-Term(iTRAQ4plex)                                                    | 1241.64812 | 38 |     |  |      | Expt2 |
| ELAVQIYEEAR                   | 4 | 25141235;6753620;14861844                                                            | N-Term(iTRAQ4plex)                                                    | 1464.78423 | 38 | 63  |  | 3.67 | Expt2 |
| IEGNLTVIPR                    | 5 | 183979966                                                                            | N-Term(iTRAQ4plex)                                                    | 1255.74797 | 38 | 53  |  | 3.74 | Expt2 |
| MLTAQDMSYDEAR                 | 3 | 117938332;117938334                                                                  | N-Term(iTRAQ4plex)                                                    | 1674.76164 | 38 | 79  |  | 4.29 | Expt2 |
| AGDTVIPLYIQCGECK              | 2 | 31982511                                                                             | N-Term(iTRAQ4plex), C13(Methylthio), C16(Methylthio), K17(iTRAQ4plex) | 2187.06131 | 38 |     |  | 3.47 | Expt2 |
| APDMSSEEFPSGAQVAPK            | 3 | 19527028                                                                             | N-Term(iTRAQ4plex), K20(iTRAQ4plex)                                   | 2370.15616 | 38 | 60  |  | 4.84 | Expt2 |
| NLSPGAVESDVR                  | 6 | 226823359                                                                            | N-Term(iTRAQ4plex)                                                    | 1387.73088 | 38 | 60  |  | 4.09 | Expt2 |
| YFPAFEK                       | 3 | 31981724                                                                             | N-Term(iTRAQ4plex), K7(iTRAQ4plex)                                    | 1189.64104 | 38 | 50  |  |      | Expt2 |
| NFLENLTVAFNVGSEK              | 7 | 226423922                                                                            | N-Term(iTRAQ4plex), K16(iTRAQ4plex)                                   | 2070.11382 | 38 | 78  |  | 3.64 | Expt2 |
| MTLADDVTLDDLIMAK              | 3 | 6679501                                                                              | N-Term(iTRAQ4plex), K16(iTRAQ4plex)                                   | 2053.08597 | 38 | 48  |  | 3.66 | Expt2 |
| AYLESEVAISEELVQK              | 2 | 34610237;34610241;13195648;34610235;34610233                                         | N-Term(iTRAQ4plex), K16(iTRAQ4plex)                                   | 2096.14524 | 38 | 45  |  |      | Expt2 |
| GFIPGIDVDPADMSTGER            | 4 | 6680027                                                                              | N-Term(iTRAQ4plex), M14(Oxidation)                                    | 2076.02433 | 38 | 41  |  | 3.61 | Expt2 |
| QTMQDLNDR                     | 8 | 122425580                                                                            | N-Term(iTRAQ4plex), Q1(Deamidated)                                    | 1265.59599 | 38 | 53  |  | 4.27 | Expt2 |
| LDSCLR                        | 1 | 47059013;20911031;54607171;113195684;9910294;47523977                                | N-Term(iTRAQ4plex)                                                    | 876.49394  | 38 |     |  |      | Expt2 |
| AEELLAQLGR                    | 6 | 29336026                                                                             | N-Term(iTRAQ4plex)                                                    | 1243.71672 | 38 | 58  |  |      | Expt2 |
| YVMTITTLR                     | 2 | 13385624                                                                             | N-Term(iTRAQ4plex)                                                    | 1358.71037 | 38 | 37  |  |      | Expt2 |
| VIQPTSGMIGNLSMTPELSSAHNVIVTER | 5 | 169234958                                                                            | N-Term(iTRAQ4plex)                                                    | 3225.67856 | 38 | 50  |  | 5.27 | Expt2 |
| YSDMIVAAIOAEK                 | 3 | 31560697                                                                             | N-Term(iTRAQ4plex), M4(Oxidation), K13(iTRAQ4plex)                    | 1742.92875 | 38 |     |  | 4.64 | Expt2 |
| IPDWFLNR                      | 1 | 6755368;149252587;38085727;149259085;149263957;149264584;149264635;82959202;83001915 | N-Term(iTRAQ4plex)                                                    | 1204.66265 | 38 |     |  |      | Expt2 |
| QLICDPSYVK                    | 3 | 116089273                                                                            | N-Term(iTRAQ4plex), C4(Methylthio), K10(iTRAQ4plex)                   | 1499.79106 | 38 | 76  |  | 3.74 | Expt2 |
| DYELQMTYR                     | 2 | 111154082;111154076                                                                  | N-Term(iTRAQ4plex)                                                    | 1463.69939 | 38 | 50  |  |      | Expt2 |
| QLPVPDSITGFAR                 | 1 | 21728370                                                                             | N-Term(iTRAQ4plex)                                                    | 1544.85491 | 38 |     |  |      | Expt2 |

|                           |    |                                                                                                                                                                                                                                                                                                                                                                                                    |                                                                                    |            |    |    |      |      |       |
|---------------------------|----|----------------------------------------------------------------------------------------------------------------------------------------------------------------------------------------------------------------------------------------------------------------------------------------------------------------------------------------------------------------------------------------------------|------------------------------------------------------------------------------------|------------|----|----|------|------|-------|
| FESLEPEMNOASR             | 1  | 117938332;117938334                                                                                                                                                                                                                                                                                                                                                                                | N-Term(iTRAQ4plex)                                                                 | 1795.84282 | 38 |    |      |      | Expt2 |
| LPNFGFVVDSEPVOK           | 13 | 7305075                                                                                                                                                                                                                                                                                                                                                                                            | N-Term(iTRAQ4plex), K17(iTRAQ4plex)                                                | 2226.17154 | 38 | 68 | 1.17 | 5.25 | Expt2 |
| AYGLALAK                  | 2  | 6678359                                                                                                                                                                                                                                                                                                                                                                                            | N-Term(iTRAQ4plex), K8(iTRAQ4plex)                                                 | 1094.69219 | 38 | 55 |      |      | Expt2 |
| DVFNLYLR                  | 3  | 150456419                                                                                                                                                                                                                                                                                                                                                                                          | N-Term(iTRAQ4plex)                                                                 | 1169.64336 | 38 | 38 |      |      | Expt2 |
| DNFTAIPEGTNGVEER          | 6  | 209862992;6681219                                                                                                                                                                                                                                                                                                                                                                                  | N-Term(iTRAQ4plex), N11(Deamidated)                                                | 1893.89299 | 38 | 52 |      | 4.18 | Expt2 |
| IDMYADGTQDLMIMMIAVAFK     | 5  | 160298217                                                                                                                                                                                                                                                                                                                                                                                          | N-Term(iTRAQ4plex), M3(Oxidation), M12(Oxidation), M13(Oxidation), K21(iTRAQ4plex) | 2697.29770 | 38 | 45 |      |      | Expt2 |
| SSSTAYMELR                | 3  | 83008262;94409542;149274201;149274205;94410061                                                                                                                                                                                                                                                                                                                                                     | N-Term(iTRAQ4plex)                                                                 | 1288.63164 | 38 | 41 |      | 4.02 | Expt2 |
| LVDLLR                    | 13 | 9790161;225543311                                                                                                                                                                                                                                                                                                                                                                                  | N-Term(iTRAQ4plex)                                                                 | 872.56908  | 38 | 31 |      |      | Expt2 |
| MSAEINEIHR                | 3  | 31543942                                                                                                                                                                                                                                                                                                                                                                                           | N-Term(iTRAQ4plex)                                                                 | 1319.71196 | 38 | 40 |      | 4.16 | Expt2 |
| TFEVCPLPVR                | 4  | 29789080                                                                                                                                                                                                                                                                                                                                                                                           | N-Term(iTRAQ4plex), C5(Methylthio)                                                 | 1368.67851 | 38 | 46 |      | 3.40 | Expt2 |
| EDIQVMTEVR                | 4  | 15426055                                                                                                                                                                                                                                                                                                                                                                                           | N-Term(iTRAQ4plex)                                                                 | 1450.73064 | 38 | 48 |      | 3.88 | Expt2 |
| EDIOGALQNYR               | 1  | 18874094                                                                                                                                                                                                                                                                                                                                                                                           | N-Term(iTRAQ4plex)                                                                 | 1450.73796 | 38 |    |      |      | Expt2 |
| ETSYEEALANQR              | 3  | 19482168;124486712                                                                                                                                                                                                                                                                                                                                                                                 | N-Term(iTRAQ4plex)                                                                 | 1554.75347 | 38 | 72 |      | 4.44 | Expt2 |
| GIPGPEGPPGPPGDLTECDVMTYVR | 5  | 22203747                                                                                                                                                                                                                                                                                                                                                                                           | N-Term(iTRAQ4plex), C20(Methylthio)                                                | 2930.35160 | 38 | 57 |      | 3.71 | Expt2 |
| SVAFPPFSGR                | 2  | 46250738                                                                                                                                                                                                                                                                                                                                                                                           | N-Term(iTRAQ4plex)                                                                 | 1305.70671 | 38 |    |      | 3.47 | Expt2 |
| DFLTPPLSVR                | 3  | 6671561;116256510                                                                                                                                                                                                                                                                                                                                                                                  | N-Term(iTRAQ4plex)                                                                 | 1401.82427 | 38 | 38 |      |      | Expt2 |
| GASQAGMTGYGMPR            | 3  | 30519911;9790125                                                                                                                                                                                                                                                                                                                                                                                   | N-Term(iTRAQ4plex)                                                                 | 1527.71868 | 38 | 77 |      | 4.82 | Expt2 |
| NWNITTFYEGTWR             | 5  | 160333229                                                                                                                                                                                                                                                                                                                                                                                          | N-Term(iTRAQ4plex)                                                                 | 1718.80535 | 38 | 53 |      | 4.18 | Expt2 |
| DVEDEETWIR                | 3  | 115496850                                                                                                                                                                                                                                                                                                                                                                                          | N-Term(iTRAQ4plex)                                                                 | 1435.68596 | 38 | 40 |      | 3.44 | Expt2 |
| LTGMAFR                   | 1  | 149248895;149249272;149249564;149249566;149250207;149251040;149251044;149251140;149251463;149251911;149251964;149251966;149252413;149258744;149258770;149258772;149258934;149258938;149259607;149259652;149259964;149260709;149260711;149263021;149264124;149265154;149265502;149265922;149266302;149266427;149266431;149268472;82996390;149270469;149270673;149273204;149274387;149275059;6679939 | N-Term(iTRAQ4plex)                                                                 | 939.52153  | 38 |    |      |      | Expt2 |
| IIAPPER                   | 4  | 6671509;6752954;6671507;157823889;14192922;33563240;30425250                                                                                                                                                                                                                                                                                                                                       | N-Term(iTRAQ4plex)                                                                 | 939.57713  | 38 |    |      |      | Expt2 |
| VVPCLVAVAGR               | 2  | 145966915                                                                                                                                                                                                                                                                                                                                                                                          | N-Term(iTRAQ4plex), C4(Methylthio)                                                 | 1370.78093 | 38 | 61 |      |      | Expt2 |
| DFIDCFLTK                 | 2  | 124001560                                                                                                                                                                                                                                                                                                                                                                                          | N-Term(iTRAQ4plex), C5(Methylthio), K9(iTRAQ4plex)                                 | 1435.72161 | 38 | 54 |      |      | Expt2 |
| TILMMGR                   | 1  | 149253258;33859482                                                                                                                                                                                                                                                                                                                                                                                 | N-Term(iTRAQ4plex)                                                                 | 965.53966  | 38 |    |      |      | Expt2 |
| SAPAACLIPAPDEAVAK         | 7  | 111185907                                                                                                                                                                                                                                                                                                                                                                                          | N-Term(iTRAQ4plex), C6(Methylthio), C8(Methylthio), K19(iTRAQ4plex)                | 2204.08866 | 38 | 41 |      | 5.42 | Expt2 |
| EQVGDOYQTVR               | 3  | 31982223                                                                                                                                                                                                                                                                                                                                                                                           | N-Term(iTRAQ4plex)                                                                 | 1466.73808 | 38 | 56 |      | 3.51 | Expt2 |
| ELGLAEGDIIIDIPOLFK        | 3  | 156938252;156938255                                                                                                                                                                                                                                                                                                                                                                                | N-Term(iTRAQ4plex), K17(iTRAQ4plex)                                                | 2159.22295 | 38 | 74 |      | 4.77 | Expt2 |
| CTPTGWIPVPR               | 2  | 71361676;109627652                                                                                                                                                                                                                                                                                                                                                                                 | N-Term(iTRAQ4plex), C1(Methylthio)                                                 | 1416.72392 | 38 |    |      | 3.91 | Expt2 |
| CLVLTFGGYDK               | 4  | 33859662                                                                                                                                                                                                                                                                                                                                                                                           | N-Term(iTRAQ4plex), C1(Methylthio), K12(iTRAQ4plex)                                | 1606.82659 | 38 | 83 |      | 3.67 | Expt2 |
| DITPTLTYVGK               | 2  | 8850219                                                                                                                                                                                                                                                                                                                                                                                            | N-Term(iTRAQ4plex), K12(iTRAQ4plex)                                                | 1608.95464 | 38 | 70 |      |      | Expt2 |
| YFFLOVSDSDGR              | 2  | 47078285                                                                                                                                                                                                                                                                                                                                                                                           | N-Term(iTRAQ4plex)                                                                 | 1577.77178 | 38 | 60 |      |      | Expt2 |
| GVLIPEVYPDIIR             | 3  | 37718993                                                                                                                                                                                                                                                                                                                                                                                           | N-Term(iTRAQ4plex)                                                                 | 1627.95659 | 38 | 56 |      | 3.57 | Expt2 |
| SGVLDEPTIATILR            | 8  | 110626165                                                                                                                                                                                                                                                                                                                                                                                          | N-Term(iTRAQ4plex)                                                                 | 1628.94109 | 38 | 56 |      | 3.69 | Expt2 |
| LLYPPETGLFLVR             | 2  | 31560712                                                                                                                                                                                                                                                                                                                                                                                           | N-Term(iTRAQ4plex)                                                                 | 1661.97782 | 38 | 54 |      |      | Expt2 |
| MTISNMEADMNR              | 5  | 157823695;157823731;157823795;157823761                                                                                                                                                                                                                                                                                                                                                            | N-Term(iTRAQ4plex)                                                                 | 1556.70122 | 38 | 53 |      | 3.69 | Expt2 |
| LGFDVQNCMSR               | 2  | 61102728                                                                                                                                                                                                                                                                                                                                                                                           | N-Term(iTRAQ4plex), C9(Methylthio)                                                 | 1558.73113 | 38 | 43 |      |      | Expt2 |
| VDFPTAIGVVLER             | 3  | 189181668                                                                                                                                                                                                                                                                                                                                                                                          | N-Term(iTRAQ4plex)                                                                 | 1559.89617 | 38 | 37 |      |      | Expt2 |
| GEWACIPYSOLR              | 4  | 46849812                                                                                                                                                                                                                                                                                                                                                                                           | N-Term(iTRAQ4plex), C5(Methylthio)                                                 | 1612.78032 | 38 | 32 |      | 3.84 | Expt2 |
| MVATGVCR                  | 6  | 6724311                                                                                                                                                                                                                                                                                                                                                                                            | N-Term(iTRAQ4plex), C7(Methylthio)                                                 | 1026.50151 | 38 | 34 |      |      | Expt2 |
| TPQAPTANLVGPR             | 1  | 14926906;126157504                                                                                                                                                                                                                                                                                                                                                                                 | N-Term(iTRAQ4plex)                                                                 | 1661.94927 | 37 |    |      |      | Expt2 |
| LTFIPFGISLR               | 3  | 54607112;54607114                                                                                                                                                                                                                                                                                                                                                                                  | N-Term(iTRAQ4plex)                                                                 | 1464.87297 | 37 | 38 |      | 3.64 | Expt2 |
| MLOEDEL                   | 2  | 6680722;149254976                                                                                                                                                                                                                                                                                                                                                                                  | N-Term(iTRAQ4plex)                                                                 | 1177.60295 | 37 | 36 |      |      | Expt2 |
| YSAPCSAGYGNA              | 3  | 148277039                                                                                                                                                                                                                                                                                                                                                                                          | N-Term(iTRAQ4plex), Y1(iTRAQ4plex), C5(Methylthio)                                 | 1494.65630 | 37 |    |      | 3.53 | Expt2 |
| ISMPEVDLNLK               | 4  | 61743961                                                                                                                                                                                                                                                                                                                                                                                           | N-Term(iTRAQ4plex), K11(iTRAQ4plex)                                                | 1546.88420 | 37 | 71 |      | 3.67 | Expt2 |

|                             |    |                                                   |                                                                       |            |    |    |      |       |
|-----------------------------|----|---------------------------------------------------|-----------------------------------------------------------------------|------------|----|----|------|-------|
| MPAAFMGLK                   | 2  | 13385466                                          | N-Term(iTRAQ4plex), M1(Oxidation), K10(iTRAQ4plex)                    | 1400.73784 | 37 | 37 |      | Expt2 |
| LGQSVTTIPTVGFNVETVYK        | 5  | 6680724                                           | N-Term(iTRAQ4plex), K21(iTRAQ4plex)                                   | 2542.40934 | 37 | 71 | 5.31 | Expt2 |
| FLTTTPNSLLVSWQAPR           | 5  | 46849812                                          | N-Term(iTRAQ4plex)                                                    | 2075.14579 | 37 | 67 | 4.32 | Expt2 |
| VADSSPFASELLIPDDCFVLDNGLCGK | 3  | 110223777                                         | N-Term(iTRAQ4plex), C17(Methylthio), C25(Methylthio), K27(iTRAQ4plex) | 3205.51792 | 37 | 39 | 5.40 | Expt2 |
| ALFLIPR                     | 2  | 114052416;114052522;114052442;114052104;145279237 | N-Term(iTRAQ4plex)                                                    | 973.63213  | 37 | 27 |      | Expt2 |
| APAMFNIR                    | 3  | 94395665;149265827                                | N-Term(iTRAQ4plex)                                                    | 1063.58501 | 37 | 34 |      | Expt2 |
| IAEVGGVPPYLLPLVVK           | 2  | 19526926                                          | N-Term(iTRAQ4plex), K16(iTRAQ4plex)                                   | 1970.19646 | 37 | 40 |      | Expt2 |
| LSLLR                       | 2  | 52138536;40556608;6754254                         | N-Term(iTRAQ4plex)                                                    | 874.54796  | 37 |    |      | Expt2 |
| LSQLLR                      | 2  | 33469017                                          | N-Term(iTRAQ4plex), Q3(Deamidated)                                    | 874.54796  | 37 |    |      | Expt2 |
| DFADMPLNR                   | 5  | 6679166                                           | N-Term(iTRAQ4plex), M5(Oxidation)                                     | 1238.59868 | 37 | 41 |      | Expt2 |
| MTNGFSGADLTEICQR            | 6  | 225543319;94408011                                | N-Term(iTRAQ4plex), M1(Oxidation), N3(Deamidated), C14(Methylthio)    | 1949.85613 | 37 | 85 | 4.28 | Expt2 |
| CVINASGPFDSVR               | 5  | 224922803                                         | N-Term(iTRAQ4plex), C1(Methylthio)                                    | 1655.80107 | 37 | 63 | 3.77 | Expt2 |
| ODLSPEAYDLGR                | 3  | 158303322                                         | N-Term(iTRAQ4plex)                                                    | 1636.78826 | 37 | 33 | 4.58 | Expt2 |
| SGNENGEFYLR                 | 14 | 149261823;164607147                               | N-Term(iTRAQ4plex), N5(Deamidated)                                    | 1430.66728 | 37 | 52 | 4.53 | Expt2 |
| SVFQVSQMVVAR                | 2  | 6671688                                           | N-Term(iTRAQ4plex), M8(Oxidation)                                     | 1411.74895 | 37 | 52 |      | Expt2 |
| ILYSQCGDVMR                 | 3  | 33620739;94363353                                 | N-Term(iTRAQ4plex), C6(Methylthio), M10(Oxidation)                    | 1490.69023 | 37 | 34 |      | Expt2 |
| GQTSQIVMPR                  | 3  | 31982664                                          | N-Term(iTRAQ4plex)                                                    | 1317.70586 | 37 | 67 | 4.57 | Expt2 |
| MFFDAELSQMOTHVSDTSVLSMDNNR  | 7  | 20911031                                          | N-Term(iTRAQ4plex), M1(Oxidation), M10(Oxidation), M23(Oxidation)     | 3294.48777 | 37 | 44 | 5.37 | Expt2 |
| IEQLSPFPFDLLK               | 4  | 85861164                                          | N-Term(iTRAQ4plex), K14(iTRAQ4plex)                                   | 1948.14775 | 37 | 53 | 3.99 | Expt2 |
| GDLYFANVEENDSR              | 5  | 110347545                                         | N-Term(iTRAQ4plex)                                                    | 1772.82341 | 37 | 96 | 3.60 | Expt2 |
| EFAPSDDEELDSYR              | 2  | 149252052                                         | N-Term(iTRAQ4plex)                                                    | 1701.77214 | 37 | 79 |      | Expt2 |
| FASEITPITISVK               | 3  | 21450129                                          | N-Term(iTRAQ4plex), K13(iTRAQ4plex)                                   | 1694.00627 | 37 | 66 | 3.51 | Expt2 |
| NAYAVLYDILK                 | 3  | 6755212                                           | N-Term(iTRAQ4plex), K12(iTRAQ4plex)                                   | 1683.99497 | 37 | 63 |      | Expt2 |
| TLPGNQCIPIPCR               | 5  | 149274894;118136302;118197277                     | N-Term(iTRAQ4plex), C8(Methylthio), C13(Methylthio)                   | 1706.83489 | 37 | 62 |      | Expt2 |
| MFQQCLELPSQSR               | 2  | 28395023                                          | N-Term(iTRAQ4plex), C5(Methylthio)                                    | 1756.83049 | 37 | 38 |      | Expt2 |
| LAPPLVTLSEGEPEVQYVALR       | 2  | 78711838;21313640                                 | N-Term(iTRAQ4plex)                                                    | 2409.39383 | 37 | 48 |      | Expt2 |
| AFITNIPFDVK                 | 6  | 21313308;158186704                                | N-Term(iTRAQ4plex), K11(iTRAQ4plex)                                   | 1552.90495 | 37 | 63 | 3.76 | Expt2 |
| DGSDYEGWCWPGSASYPDFTNPR     | 4  | 6679891                                           | N-Term(iTRAQ4plex), C9(Methylthio)                                    | 2797.15189 | 37 | 51 | 4.04 | Expt2 |
| VLFPVR                      | 3  | 239052674                                         | N-Term(iTRAQ4plex)                                                    | 945.59892  | 37 | 36 |      | Expt2 |
| IANPVEGSTR                  | 3  | 157042772;157041229;157057549                     | N-Term(iTRAQ4plex)                                                    | 1302.67693 | 37 | 33 | 3.46 | Expt2 |
| IIDAALR                     | 6  | 112181182                                         | N-Term(iTRAQ4plex)                                                    | 915.57616  | 37 | 35 |      | Expt2 |
| TPFLVGTQIDLR                | 3  | 6753364                                           | N-Term(iTRAQ4plex)                                                    | 1616.94925 | 37 | 63 | 3.46 | Expt2 |
| DFFLANASR                   | 2  | 160333229                                         | N-Term(iTRAQ4plex)                                                    | 1184.62078 | 37 | 38 |      | Expt2 |
| IPAETLNR                    | 7  | 6678321                                           | N-Term(iTRAQ4plex)                                                    | 1057.61223 | 37 | 38 |      | Expt2 |
| IGDTIEFR                    | 3  | 19745150                                          | N-Term(iTRAQ4plex)                                                    | 1094.59966 | 37 | 37 |      | Expt2 |
| CIDIDECR                    | 2  | 165905609;165905611                               | N-Term(iTRAQ4plex), C1(Methylthio), C7(Methylthio)                    | 1202.47856 | 37 | 37 |      | Expt2 |
| IIIFPR                      | 10 | 149251177;149252074;94397192;149266965;238776830  | N-Term(iTRAQ4plex)                                                    | 902.59642  | 37 |    |      | Expt2 |
| LVLQLR                      | 7  | 149270110;19527372                                | N-Term(iTRAQ4plex)                                                    | 984.66924  | 37 |    |      | Expt2 |
| CFIEIPEDETMVIGNYR           | 7  | 19527236;145966911                                | N-Term(iTRAQ4plex), C1(Methylthio), M11(Oxidation)                    | 2235.03183 | 37 | 65 | 3.96 | Expt2 |
| TAVAPIER                    | 3  | 22094075;148747424                                | N-Term(iTRAQ4plex)                                                    | 1000.59197 | 37 | 36 |      | Expt2 |
| LTCYSGFSSPR                 | 3  | 27734847                                          | N-Term(iTRAQ4plex), C3(Methylthio)                                    | 1508.69890 | 37 | 54 | 3.91 | Expt2 |
| LTAIAR                      | 6  | 6677805;82907488                                  | N-Term(iTRAQ4plex)                                                    | 975.56005  | 37 | 38 |      | Expt2 |
| DVVILNR                     | 1  | 225637487                                         | N-Term(iTRAQ4plex)                                                    | 1059.60796 | 37 |    |      | Expt2 |
| AAEEAFVNDIDESSPGTEWER       | 8  | 122939192;122939196                               | N-Term(iTRAQ4plex)                                                    | 2496.12358 | 37 | 64 | 3.72 | Expt2 |
| TLAESALQLLYTAK              | 3  | 227116327                                         | N-Term(iTRAQ4plex), K14(iTRAQ4plex)                                   | 1810.05814 | 37 | 51 | 3.53 | Expt2 |
| AWDDFFPGSDR                 | 5  | 14149750                                          | N-Term(iTRAQ4plex)                                                    | 1456.66252 | 37 | 36 | 3.54 | Expt2 |
| LPEAAFLAR                   | 2  | 29789080                                          | N-Term(iTRAQ4plex)                                                    | 1131.66582 | 37 | 33 |      | Expt2 |
| LVPVGYGIK                   | 1  | 31980922                                          | N-Term(iTRAQ4plex), K9(iTRAQ4plex)                                    | 1233.78459 | 37 |    |      | Expt2 |
| LAVEAVLR                    | 3  | 126521835                                         | N-Term(iTRAQ4plex)                                                    | 1014.63939 | 37 | 36 |      | Expt2 |
| LAVEALVR                    | 1  | 6680169                                           | N-Term(iTRAQ4plex)                                                    | 1014.63939 | 37 |    |      | Expt2 |
| AISTTCIPNYPDR               | 3  | 31560120                                          | N-Term(iTRAQ4plex), C6(Methylthio)                                    | 1640.78996 | 36 | 57 | 3.71 | Expt2 |
| EDITQLR                     | 3  | 33859520                                          | N-Term(iTRAQ4plex), O5(Deamidated)                                    | 1019.54889 | 36 | 44 |      | Expt2 |
| EDLTEIR                     | 3  | 94369748;94383772;6671569                         | N-Term(iTRAQ4plex)                                                    | 1019.54889 | 36 | 44 |      | Expt2 |

|                         |     |                                                                    |                                                                                       |            |    |     |      |      |       |
|-------------------------|-----|--------------------------------------------------------------------|---------------------------------------------------------------------------------------|------------|----|-----|------|------|-------|
| MCLFAGFQR               | 2   | 160333923                                                          | N-Term(iTRAQ4plex), C2(Methylthio)                                                    | 1262.59758 | 36 |     |      | 3.51 | Expt2 |
| SNGSVFVR                | 1   | 19111156                                                           | N-Term(iTRAQ4plex)                                                                    | 1009.54314 | 36 |     |      |      | Expt2 |
| GYMGECGFR               | 4   | 33413404                                                           | N-Term(iTRAQ4plex), C6(Methylthio)                                                    | 1209.49761 | 36 | 32  |      |      | Expt2 |
| GIVGMPGOR               | 1   | 86613790                                                           | N-Term(iTRAQ4plex), M5(Oxidation)                                                     | 1074.58403 | 36 |     |      |      | Expt2 |
| LLVVTDPDR               | 2   | 149251929;82905443;51766344;149270876                              | N-Term(iTRAQ4plex)                                                                    | 1056.65459 | 36 | 30  |      |      | Expt2 |
| LLVVTNPR                | 2   | 63514363                                                           | N-Term(iTRAQ4plex), N6(Deamidated)                                                    | 1056.65459 | 36 | 30  |      |      | Expt2 |
| FSPDGELYASGEDGTLR       | 6   | 160707896                                                          | N-Term(iTRAQ4plex)                                                                    | 2044.96282 | 36 | 70  |      | 4.48 | Expt2 |
| NMQDVTEDYK              | 4   | 54607171;113195684                                                 | N-Term(iTRAQ4plex), K10(iTRAQ4plex)                                                   | 1530.74993 | 36 | 64  |      | 4.54 | Expt2 |
| LLQLVEDR                | 2   | 83816893                                                           | N-Term(iTRAQ4plex)                                                                    | 1129.66985 | 36 | 36  |      |      | Expt2 |
| DMDVVSGR                | 5   | 6753824                                                            | N-Term(iTRAQ4plex)                                                                    | 1022.50481 | 36 | 44  |      |      | Expt2 |
| TSFSSVSR                | 6   | 20911031                                                           | N-Term(iTRAQ4plex)                                                                    | 1014.53691 | 36 | 47  |      |      | Expt2 |
| QCANLQNAIAEAQR          | 70  | 20911031                                                           | N-Term(iTRAQ4plex), C2(Methylthio), N4(Deamidated)                                    | 1849.86711 | 36 | 88  | 0.99 | 6.58 | Expt2 |
| GVGDGTVSWGLEDDEDMTLTR   | 6   | 42741690;31543918;226823223                                        | N-Term(iTRAQ4plex), M17(Oxidation)                                                    | 2413.10410 | 36 | 60  |      | 5.31 | Expt2 |
| GLNTIPLFVQLLYSPIENIQR   | 1   | 6671684                                                            | N-Term(iTRAQ4plex)                                                                    | 2572.47068 | 36 |     |      |      | Expt2 |
| GSCPEEGIGAGTELRL        | 3   | 224967060                                                          | N-Term(iTRAQ4plex), C4(Methylthio)                                                    | 1778.85515 | 36 | 61  |      | 4.07 | Expt2 |
| LADLMER                 | 2   | 7106242;85861182                                                   | N-Term(iTRAQ4plex)                                                                    | 991.53649  | 36 | 35  |      |      | Expt2 |
| AITSAYYR                | 1   | 31980840;6679583;31980838                                          | N-Term(iTRAQ4plex)                                                                    | 1088.58391 | 36 |     |      |      | Expt2 |
| LAALADQWQFLVQK          | 3   | 115496850                                                          | N-Term(iTRAQ4plex), K14(iTRAQ4plex)                                                   | 1919.10759 | 36 | 77  |      | 3.81 | Expt2 |
| EVGETLLYYGCR            | 2   | 6679421                                                            | N-Term(iTRAQ4plex), C11(Methylthio)                                                   | 1592.75864 | 36 | 32  |      |      | Expt2 |
| EFVISDR                 | 2   | 19482160                                                           | N-Term(iTRAQ4plex)                                                                    | 1009.54314 | 36 | 31  |      |      | Expt2 |
| LVINTEVPSAVR            | 3   | 18874094                                                           | N-Term(iTRAQ4plex)                                                                    | 1441.85088 | 36 | 38  |      | 3.71 | Expt2 |
| LPVLPPK                 | 16  | 6679166                                                            | N-Term(iTRAQ4plex), K7(iTRAQ4plex)                                                    | 1051.72063 | 36 | 51  |      |      | Expt2 |
| AMVLDLR                 | 4   | 20137004;71725358                                                  | N-Term(iTRAQ4plex)                                                                    | 961.56249  | 36 | 34  |      |      | Expt2 |
| QTVEADINGLR             | 143 | 118130981                                                          | N-Term(iTRAQ4plex), N8(Deamidated)                                                    | 1360.71723 | 36 | 73  |      | 4.35 | Expt2 |
| GLFIIDPNGVVK            | 3   | 6680690                                                            | N-Term(iTRAQ4plex), N8(Deamidated), K12(iTRAQ4plex)                                   | 1560.93010 | 36 | 49  |      | 4.11 | Expt2 |
| TIPEACR                 | 2   | 6753824                                                            | N-Term(iTRAQ4plex), C6(Methylthio)                                                    | 979.48204  | 36 |     |      |      | Expt2 |
| MLEEELAMR               | 2   | 82950147;149264086                                                 | N-Term(iTRAQ4plex), M1(Oxidation)                                                     | 1410.67290 | 36 | 46  |      |      | Expt2 |
| IVVNLTGR                | 10  | 24762230;149250304;94372414;149254145;94388628;149261725;149270415 | N-Term(iTRAQ4plex)                                                                    | 1015.63738 | 36 | 40  |      |      | Expt2 |
| TSACGLFVVCYPR           | 3   | 77539776;77539770;8394027                                          | N-Term(iTRAQ4plex), C4(Methylthio), C10(Methylthio)                                   | 1639.72576 | 36 | 54  |      | 4.32 | Expt2 |
| LSLSNAISTVPLTLRL        | 5   | 134288917                                                          | N-Term(iTRAQ4plex)                                                                    | 1970.18351 | 36 | 51  |      | 4.06 | Expt2 |
| LEQSNVPEGPGSGTGDDESSGPR | 5   | 55926127                                                           | N-Term(iTRAQ4plex)                                                                    | 2301.06963 | 36 | 113 |      | 4.44 | Expt2 |
| GVCTEAGMYALR            | 3   | 7110703                                                            | N-Term(iTRAQ4plex), C3(Methylthio)                                                    | 1460.68120 | 36 | 34  |      | 4.36 | Expt2 |
| TNVDTMCLDINECER         | 3   | 118197277                                                          | N-Term(iTRAQ4plex), M7(Oxidation), C8(Methylthio), C14(Methylthio)                    | 2135.86382 | 36 | 60  |      |      | Expt2 |
| AEECYDETASR             | 3   | 117647249                                                          | N-Term(iTRAQ4plex), C4(Methylthio)                                                    | 1725.72405 | 36 | 40  |      | 4.24 | Expt2 |
| GFGTDEQAIIIDCLGSR       | 10  | 160707921                                                          | N-Term(iTRAQ4plex), C12(Methylthio)                                                   | 1871.87876 | 36 | 52  |      | 4.16 | Expt2 |
| DLPSPIER                | 3   | 149263750                                                          | N-Term(iTRAQ4plex)                                                                    | 1070.59783 | 36 | 42  |      |      | Expt2 |
| VOAVVAVAR               | 2   | 117938332;117938334                                                | N-Term(iTRAQ4plex)                                                                    | 1056.66545 | 36 | 43  |      |      | Expt2 |
| AEYEFDSPYWDDISDSAK      | 6   | 19527140;79750129                                                  | N-Term(iTRAQ4plex), K18(iTRAQ4plex)                                                   | 2426.08976 | 36 | 69  |      | 4.04 | Expt2 |
| QFFFOR                  | 1   | 115496850                                                          | N-Term(iTRAQ4plex)                                                                    | 1016.54430 | 36 |     |      |      | Expt2 |
| DOYSVIFESGDR            | 4   | 29789343                                                           | N-Term(iTRAQ4plex)                                                                    | 1559.74895 | 36 | 57  |      | 3.93 | Expt2 |
| APVVLQPEQIVSEETPPPLTK   | 2   | 194394197;146231985                                                | N-Term(iTRAQ4plex), K23(iTRAQ4plex)                                                   | 2802.58445 | 36 |     |      | 4.11 | Expt2 |
| GNLANVIR                | 7   | 22094075;148747424                                                 | N-Term(iTRAQ4plex)                                                                    | 1000.60246 | 36 | 48  |      |      | Expt2 |
| VIAPGSSLPSTLIPNPR       | 4   | 32129201                                                           | N-Term(iTRAQ4plex)                                                                    | 1964.13388 | 36 | 48  |      | 4.15 | Expt2 |
| TCVDIDEATGR             | 4   | 73088940;71067128                                                  | N-Term(iTRAQ4plex), C2(Methylthio), C8(Methylthio)                                    | 1518.61357 | 35 | 51  |      | 3.63 | Expt2 |
| VGDVGPLGER              | 1   | 8393173                                                            | N-Term(iTRAQ4plex)                                                                    | 1142.62615 | 35 |     |      |      | Expt2 |
| LLVCEIDIECONGPVCQR      | 4   | 118197277                                                          | N-Term(iTRAQ4plex), C4(Methylthio), C10(Methylthio), N12(Deamidated), C16(Methylthio) | 2316.95757 | 35 | 53  |      | 4.45 | Expt2 |
| DDDPLNAR                | 2   | 22203747                                                           | N-Term(iTRAQ4plex)                                                                    | 1059.51970 | 35 | 34  |      |      | Expt2 |
| FCPFAQR                 | 2   | 6754090                                                            | N-Term(iTRAQ4plex), C2(Methylthio)                                                    | 1058.50456 | 35 | 27  |      |      | Expt2 |
| SLCNLEESITSAGR          | 3   | 61098124                                                           | N-Term(iTRAQ4plex), C3(Methylthio)                                                    | 1669.80327 | 35 | 48  |      | 4.15 | Expt2 |
| LDACEGDSGGLPLVISDNR     | 3   | 188536038                                                          | N-Term(iTRAQ4plex), C4(Methylthio)                                                    | 2007.92839 | 35 | 110 |      | 4.17 | Expt2 |
| TLLVADPR                | 4   | 149254484;149262347                                                | N-Term(iTRAQ4plex)                                                                    | 1028.62407 | 35 | 51  |      |      | Expt2 |
| AFFSEVER                | 1   | 6755100                                                            | N-Term(iTRAQ4plex)                                                                    | 1128.58183 | 35 |     |      |      | Expt2 |
| GYFNEEMNR               | 3   | 37537522                                                           | N-Term(iTRAQ4plex), N4(Deamidated), M7(Oxidation)                                     | 1320.56706 | 35 | 37  |      |      | Expt2 |

|                                 |    |                                                                                                                                         |                                                                      |            |    |     |      |       |
|---------------------------------|----|-----------------------------------------------------------------------------------------------------------------------------------------|----------------------------------------------------------------------|------------|----|-----|------|-------|
| ELFEADPER                       | 4  | 94380203                                                                                                                                | N-Term(ITRAQ4plex)                                                   | 1249.61821 | 35 | 34  |      | Expt2 |
| GTVDVCQAR                       | 2  | 110625656;270309161                                                                                                                     | N-Term(ITRAQ4plex), C5(Methylthio)                                   | 1138.54753 | 35 | 51  |      | Expt2 |
| FFAPECGR                        | 3  | 170650623                                                                                                                               | N-Term(ITRAQ4plex), C6(Methylthio)                                   | 1116.50737 | 35 | 30  |      | Expt2 |
| IGGMEGPFGGGMENMGR               | 6  | 21313308;158186704                                                                                                                      | N-Term(ITRAQ4plex)                                                   | 1840.82744 | 35 | 93  | 4.29 | Expt2 |
| LMDDLR                          | 3  | 6755392                                                                                                                                 | N-Term(ITRAQ4plex), M2(Oxidation)                                    | 1037.50537 | 35 | 40  |      | Expt2 |
| EGYTFSLR                        | 1  | 21704174                                                                                                                                | N-Term(ITRAQ4plex)                                                   | 1245.62468 | 34 |     |      | Expt2 |
| LLGLAVR                         | 3  | 6755372                                                                                                                                 | N-Term(ITRAQ4plex)                                                   | 942.62364  | 34 | 34  |      | Expt2 |
| WTLGFCDER                       | 3  | 13384778                                                                                                                                | N-Term(ITRAQ4plex), C6(Methylthio)                                   | 1316.58879 | 34 | 47  | 3.60 | Expt2 |
| DLEEWQR                         | 2  | 30794164                                                                                                                                | N-Term(ITRAQ4plex)                                                   | 1233.59844 | 34 | 34  |      | Expt2 |
| NMYEEINETR                      | 3  | 188219589                                                                                                                               | N-Term(ITRAQ4plex), M2(Oxidation)                                    | 1587.71086 | 34 | 45  | 3.72 | Expt2 |
| EIVPVLVSSR                      | 2  | 110625948;148747461                                                                                                                     | N-Term(ITRAQ4plex)                                                   | 1242.75041 | 34 | 43  |      | Expt2 |
| DCEECIQLEPTFIK                  | 5  | 14389431                                                                                                                                | N-Term(ITRAQ4plex), C2(Methylthio), C5(Methylthio), K14(ITRAQ4plex)  | 2047.94327 | 34 | 40  | 3.47 | Expt2 |
| YLAFLR                          | 1  | 31981945                                                                                                                                | N-Term(ITRAQ4plex)                                                   | 926.55461  | 34 |     |      | Expt2 |
| IVILR                           | 5  | 149241341;149271766;149274544;165972319;227330584;148529020;170172577;117676374;84781795;28076887;114326546;46361984;118130979;24233564 | N-Term(ITRAQ4plex)                                                   | 757.54613  | 34 |     |      | Expt2 |
| CCQCPSPGLQAPDGR                 | 6  | 73088940;71067128                                                                                                                       | N-Term(ITRAQ4plex), C1(Methylthio), C3(Methylthio)                   | 1777.79839 | 34 | 66  | 4.17 | Expt2 |
| NDQCIEDIR                       | 3  | 6753494                                                                                                                                 | N-Term(ITRAQ4plex), C4(Methylthio)                                   | 1345.56377 | 34 | 35  | 3.65 | Expt2 |
| ALLFIPR                         | 21 | 40556608                                                                                                                                | N-Term(ITRAQ4plex)                                                   | 973.63603  | 34 | 35  |      | Expt2 |
| IPLNLIQIR                       | 2  | 46560582;6681283                                                                                                                        | N-Term(ITRAQ4plex)                                                   | 1352.83830 | 34 | 44  |      | Expt2 |
| FPAMSDAYDR                      | 2  | 149265958;183074535;7305395                                                                                                             | N-Term(ITRAQ4plex)                                                   | 1316.60747 | 33 | 30  |      | Expt2 |
| NLSGQPNFPCR                     | 2  | 19111162                                                                                                                                | N-Term(ITRAQ4plex), C10(Methylthio)                                  | 1422.67461 | 33 | 39  |      | Expt2 |
| LIOEILGR                        | 8  | 111185907                                                                                                                               | N-Term(ITRAQ4plex)                                                   | 1085.68181 | 33 | 47  |      | Expt2 |
| CDPVDFDGTGPR                    | 2  | 54020676                                                                                                                                | N-Term(ITRAQ4plex), C1(Methylthio)                                   | 1500.67693 | 33 | 30  |      | Expt2 |
| CCDIPSR                         | 27 | 111074529                                                                                                                               | N-Term(ITRAQ4plex), C1(Methylthio), C2(Methylthio)                   | 1029.40752 | 33 | 29  |      | Expt2 |
| VSLAVLNPYIK                     | 3  | 149251053;51766932                                                                                                                      | N-Term(ITRAQ4plex), K11(ITRAQ4plex)                                  | 1504.94499 | 33 | 77  | 3.71 | Expt2 |
| IIQOGLIR                        | 2  | 149258842;30795222                                                                                                                      | N-Term(ITRAQ4plex), O4(Deamidated)                                   | 1085.68218 | 33 |     |      | Expt2 |
| AVVLIPSLATTFK                   | 2  | 22122387                                                                                                                                | N-Term(ITRAQ4plex), K13(ITRAQ4plex)                                  | 1648.03708 | 33 | 53  |      | Expt2 |
| GDDGIFDDNFIEER                  | 4  | 31560433                                                                                                                                | N-Term(ITRAQ4plex)                                                   | 1785.81023 | 32 | 59  | 4.80 | Expt2 |
| CDDVIR                          | 6  | 6671509;6752954;30425250                                                                                                                | N-Term(ITRAQ4plex), C1(Methylthio)                                   | 910.42375  | 32 | 31  |      | Expt2 |
| CVDGAYFNSR                      | 3  | 8394362                                                                                                                                 | N-Term(ITRAQ4plex), C1(Methylthio)                                   | 1321.57854 | 32 | 31  |      | Expt2 |
| SSVAVPYIVPLK                    | 9  | 126518317                                                                                                                               | N-Term(ITRAQ4plex), K13(ITRAQ4plex)                                  | 1660.03545 | 32 | 49  | 3.64 | Expt2 |
| GSSYFSMSDAEGR                   | 2  | 160333881                                                                                                                               | N-Term(ITRAQ4plex), M7(Oxidation)                                    | 1553.67070 | 32 | 57  |      | Expt2 |
| IYVLLR                          | 1  | 149258586                                                                                                                               | N-Term(ITRAQ4plex)                                                   | 920.60411  | 32 |     |      | Expt2 |
| TLSGMESYCVR                     | 3  | 6753322                                                                                                                                 | N-Term(ITRAQ4plex), C9(Methylthio)                                   | 1435.65373 | 32 | 26  | 3.40 | Expt2 |
| SPILVTVVR                       | 9  | 158749615                                                                                                                               | N-Term(ITRAQ4plex)                                                   | 1127.72942 | 32 | 29  |      | Expt2 |
| AVDLQILPK                       | 3  | 82880886;149261044;149270558;149270560;149274983;84662736                                                                               | N-Term(ITRAQ4plex), K9(ITRAQ4plex)                                   | 1284.80657 | 31 | 44  | 3.57 | Expt2 |
| ILGIPVITEQYPK                   | 2  | 31541909                                                                                                                                | N-Term(ITRAQ4plex), K14(ITRAQ4plex)                                  | 1872.15561 | 31 | 40  |      | Expt2 |
| FLESGGDGAGDDEDLDLEALEPDMEEEDDQK | 5  | 42415475                                                                                                                                | N-Term(ITRAQ4plex), K33(ITRAQ4plex)                                  | 3914.67202 | 31 | 70  | 4.41 | Expt2 |
| ECADLWPR                        | 6  | 12584986                                                                                                                                | N-Term(ITRAQ4plex), C2(Methylthio)                                   | 1179.54021 | 31 | 28  |      | Expt2 |
| DCFGCLR                         | 9  | 6753178                                                                                                                                 | N-Term(ITRAQ4plex), C2(Methylthio), C5(Methylthio)                   | 1049.41509 | 31 | 23  |      | Expt2 |
| LELPPR                          | 2  | 124487435                                                                                                                               | N-Term(ITRAQ4plex)                                                   | 868.53990  | 31 | 26  |      | Expt2 |
| TIOAVLTVPK                      | 3  | 117606335                                                                                                                               | N-Term(ITRAQ4plex), K10(ITRAQ4plex)                                  | 1357.87297 | 30 | 62  |      | Expt2 |
| IECESAETTEDCIEK                 | 4  | 20330802                                                                                                                                | N-Term(ITRAQ4plex), C3(Methylthio), C12(Methylthio), K15(ITRAQ4plex) | 2079.87993 | 30 | 57  | 3.56 | Expt2 |
| TVVILIEPTDGIPVK                 | 2  | 126518317                                                                                                                               | N-Term(ITRAQ4plex), K15(ITRAQ4plex)                                  | 1882.15610 | 30 | 40  |      | Expt2 |
| LVQLLVR                         | 4  | 6671684                                                                                                                                 | N-Term(ITRAQ4plex)                                                   | 984.67034  | 30 | 36  |      | Expt2 |
| LIVLANR                         | 6  | 170932554                                                                                                                               | N-Term(ITRAQ4plex), N6(Deamidated)                                   | 943.60631  | 30 |     |      | Expt2 |
| FVDEEDGGDQAGPDEGEVDSCLR         | 8  | 224809382                                                                                                                               | N-Term(ITRAQ4plex), C22(Methylthio)                                  | 2686.10886 | 30 | 104 | 5.16 | Expt2 |
| VSWQEQCCR                       | 1  | 110735428;110735426                                                                                                                     | N-Term(ITRAQ4plex), C8(Methylthio)                                   | 1437.63774 | 30 |     |      | Expt2 |
| VLGLIR                          | 6  | 37704389                                                                                                                                | N-Term(ITRAQ4plex)                                                   | 885.59880  | 30 | 28  |      | Expt2 |
| VLQLL                           | 6  | 31981515;124486949                                                                                                                      | N-Term(ITRAQ4plex)                                                   | 885.59880  | 30 | 28  |      | Expt2 |
| ILLOSIR                         | 3  | 6679931                                                                                                                                 | N-Term(ITRAQ4plex), Q4(Deamidated)                                   | 987.63323  | 29 | 29  |      | Expt2 |
| LIISLR                          | 3  | 6755214                                                                                                                                 | N-Term(ITRAQ4plex)                                                   | 987.63323  | 29 | 29  |      | Expt2 |
| ILIDLTR                         | 1  | 21703836                                                                                                                                | N-Term(ITRAQ4plex)                                                   | 987.63323  | 29 |     |      | Expt2 |



|                               |    |                                                                                                                                                                                                                   |                                                                                                                      |            |    |     |      |       |
|-------------------------------|----|-------------------------------------------------------------------------------------------------------------------------------------------------------------------------------------------------------------------|----------------------------------------------------------------------------------------------------------------------|------------|----|-----|------|-------|
| IVLGRVTR                      | 1  | 33239284                                                                                                                                                                                                          | N-Term(iTRAQ4plex)                                                                                                   | 1057.68657 | 29 |     |      | Expt2 |
| TLLPLISR                      | 2  | 115647999                                                                                                                                                                                                         | N-Term(iTRAQ4plex)                                                                                                   | 1056.68901 | 29 | 27  |      | Expt2 |
| SILCCLR                       | 3  | 149255313                                                                                                                                                                                                         | N-Term(iTRAQ4plex), C4(Methylthio), C5(Methylthio)                                                                   | 1043.49712 | 29 | 30  |      | Expt2 |
| GDGQTCYDIDECSEQPSR            | 4  | 171543883                                                                                                                                                                                                         | N-Term(iTRAQ4plex), C6(Methylthio), C12(Methylthio)                                                                  | 2238.84770 | 29 | 53  | 4.45 | Expt2 |
| EWQFYCCR                      | 2  | 9789943                                                                                                                                                                                                           | N-Term(iTRAQ4plex), C6(Methylthio), C7(Methylthio)                                                                   | 1370.52605 | 29 | 22  |      | Expt2 |
| DCGTCDPGYNYLQSGQGCER          | 3  | 153791270                                                                                                                                                                                                         | N-Term(iTRAQ4plex), C2(Methylthio), C5(Methylthio), C18(Methylthio)                                                  | 2447.90201 | 28 | 38  | 3.78 | Expt2 |
| MNECHYDK                      | 1  | 12667796                                                                                                                                                                                                          | M1(Oxidation), N-Term(iTRAQ4plex), N2(Deamidated), C4(Methylthio), K8(iTRAQ4plex)                                    | 1390.58183 | 28 |     |      | Expt2 |
| VLLLLNR                       | 7  | 149258986                                                                                                                                                                                                         | N-Term(iTRAQ4plex)                                                                                                   | 984.66643  | 28 |     |      | Expt2 |
| ALDLIEVLVTK                   | 3  | 31982724                                                                                                                                                                                                          | N-Term(iTRAQ4plex), K11(iTRAQ4plex)                                                                                  | 1501.95305 | 27 | 75  | 3.62 | Expt2 |
| VLGLVLLR                      | 5  | 7305509:6678053                                                                                                                                                                                                   | N-Term(iTRAQ4plex)                                                                                                   | 1026.71904 | 27 | 35  |      | Expt2 |
| TDSFSCNVR                     | 3  | 149263750                                                                                                                                                                                                         | N-Term(iTRAQ4plex), C6(Methylthio)                                                                                   | 1218.53752 | 27 | 40  |      | Expt2 |
| NLVVIPK                       | 2  | 160707894                                                                                                                                                                                                         | N-Term(iTRAQ4plex), K7(iTRAQ4plex)                                                                                   | 1070.72624 | 27 | 23  |      | Expt2 |
| CCSGSLVER                     | 7  | 163310765                                                                                                                                                                                                         | N-Term(iTRAQ4plex), C1(Methylthio), C2(Methylthio)                                                                   | 1189.49236 | 27 | 38  | 3.49 | Expt2 |
| VPVNLRL                       | 1  | 134288917                                                                                                                                                                                                         | N-Term(iTRAQ4plex)                                                                                                   | 954.62322  | 27 |     |      | Expt2 |
| CECPNGMTLDATGR                | 2  | 118197277                                                                                                                                                                                                         | N-Term(iTRAQ4plex), C1(Methylthio), C3(Methylthio), N5(Deamidated)                                                   | 1704.66448 | 27 | 58  |      | Expt2 |
| CDPIDQCQDSETR                 | 4  | 46849812                                                                                                                                                                                                          | N-Term(iTRAQ4plex), C1(Methylthio), C7(Methylthio)                                                                   | 1745.66985 | 27 | 67  | 3.46 | Expt2 |
| DCVTPNEYTAACSR                | 2  | 13385320                                                                                                                                                                                                          | N-Term(iTRAQ4plex), C2(Methylthio), C12(Methylthio)                                                                  | 1765.71099 | 27 | 55  |      | Expt2 |
| ETLILLLK                      | 6  | 30520173:225543183                                                                                                                                                                                                | N-Term(iTRAQ4plex), K8(iTRAQ4plex)                                                                                   | 1230.83672 | 26 | 52  | 3.62 | Expt2 |
| LSLIIR                        | 9  | 149258822:11230784:51036613:27370240:27370092                                                                                                                                                                     | N-Term(iTRAQ4plex)                                                                                                   | 858.58946  | 26 | 29  |      | Expt2 |
| NGYDCECLGGGR                  | 3  | 58037409                                                                                                                                                                                                          | N-Term(iTRAQ4plex), N1(Deamidated), C5(Methylthio), C7(Methylthio)                                                   | 1480.54094 | 26 | 33  | 4.24 | Expt2 |
| NPCYVDDNCDPQTVANR             | 7  | 82997826:38084778:94405733:83019564                                                                                                                                                                               | N-Term(iTRAQ4plex), C3(Methylthio), C9(Methylthio)                                                                   | 2159.86968 | 26 | 77  | 4.05 | Expt2 |
| LLLIR                         | 64 | 22122825:149259510:149265267:149265372:94402646:94406016:149270489:170763522:117938280:153791278:85701452:114155137:125490365:148276994:6680806:41053864:21312986:158937319:27370506:124487348:75677412:153792273 | N-Term(iTRAQ4plex)                                                                                                   | 771.55693  | 26 | 23  |      | Expt2 |
| FACFER                        | 3  | 149258501:19526818                                                                                                                                                                                                | N-Term(iTRAQ4plex), C3(Methylthio)                                                                                   | 962.43291  | 25 | 22  |      | Expt2 |
| LLLLGR                        | 7  | 117959926                                                                                                                                                                                                         | N-Term(iTRAQ4plex)                                                                                                   | 828.58232  | 25 | 31  |      | Expt2 |
| ILLGLR                        | 4  | 6678874:85702045                                                                                                                                                                                                  | N-Term(iTRAQ4plex)                                                                                                   | 828.58190  | 25 |     |      | Expt2 |
| LLLAVR                        | 2  | 30520049                                                                                                                                                                                                          | N-Term(iTRAQ4plex)                                                                                                   | 828.58190  | 25 |     |      | Expt2 |
| DGIGDECDDDNDGIPDLVPPGPDNCR    | 4  | 6755781                                                                                                                                                                                                           | N-Term(iTRAQ4plex), C7(Methylthio), C27(Methylthio)                                                                  | 3179.23935 | 24 | 21  |      | Expt2 |
| VVPVP                         | 6  | 31981562                                                                                                                                                                                                          | N-Term(iTRAQ4plex)                                                                                                   | 654.43170  | 21 | 35  |      | Expt2 |
| VIPLVR                        | 4  | 6753074                                                                                                                                                                                                           | N-Term(iTRAQ4plex)                                                                                                   | 840.57506  | 19 | 25  |      | Expt2 |
| VIPVIR                        | 2  |                                                                                                                                                                                                                   | N-Term(iTRAQ4plex)                                                                                                   | 840.58171  | 19 |     |      | Expt2 |
| SCCSCPVGCAK                   | 5  | 33468863                                                                                                                                                                                                          | N-Term(iTRAQ4plex), C2(Methylthio), C3(Methylthio), C5(Methylthio), C6(Methylthio), C10(Methylthio), K12(iTRAQ4plex) | 1678.54314 | 16 | 38  | 3.53 | Expt2 |
| DMCTYCR                       | 2  | 70909345                                                                                                                                                                                                          | N-Term(iTRAQ4plex), C3(Methylthio), C6(Methylthio)                                                                   | 1127.39324 | 15 | 19  |      | Expt2 |
| IMVDMLEDSGSK                  | 2  | 157951598                                                                                                                                                                                                         | N-Term(iTRAQ4plex), K13(iTRAQ4plex)                                                                                  | 1697.83916 |    | 115 | 3.96 | Expt2 |
| VLVETEGPAGVAVMK               | 2  | 31981810                                                                                                                                                                                                          | N-Term(iTRAQ4plex), K15(iTRAQ4plex)                                                                                  | 1788.01726 |    | 113 | 4.86 | Expt2 |
| SLELQMSNPLGDEGVQELCK          | 2  | 31981748:285402638:285402659                                                                                                                                                                                      | N-Term(iTRAQ4plex), M7(Oxidation), C21(Methylthio), K22(iTRAQ4plex)                                                  | 2740.36319 |    | 112 | 4.55 | Expt2 |
| AQQEDALAAQFAEFAR              | 2  | 238814331:238814333:238814337                                                                                                                                                                                     | N-Term(iTRAQ4plex)                                                                                                   | 1948.94670 |    | 112 | 4.54 | Expt2 |
| IQMLDALTDLTK                  | 7  | 62988342                                                                                                                                                                                                          | N-Term(iTRAQ4plex), K13(iTRAQ4plex)                                                                                  | 1764.97295 |    | 107 | 4.05 | Expt2 |
| TCVADESAANCDK                 | 4  | 163310765                                                                                                                                                                                                         | N-Term(iTRAQ4plex), C2(Methylthio), C11(Methylthio), K13(iTRAQ4plex)                                                 | 1706.70830 |    | 106 | 4.14 | Expt2 |
| TAPYVVTGSVDQTVK               | 4  | 149262197:7305363                                                                                                                                                                                                 | N-Term(iTRAQ4plex), K15(iTRAQ4plex)                                                                                  | 1853.03081 |    | 103 | 4.23 | Expt2 |
| TVQVPMPGPDGLPVDASAVSNNYIOTLGR | 4  | 146219835:146219830:146219849:146231979                                                                                                                                                                           | N-Term(iTRAQ4plex)                                                                                                   | 3140.62204 |    | 103 | 3.71 | Expt2 |
| LLLEYTDSYEDK                  | 2  | 6680121                                                                                                                                                                                                           | N-Term(iTRAQ4plex), K13(iTRAQ4plex)                                                                                  | 1877.96025 |    | 101 | 3.83 | Expt2 |
| DMETIGFAVYQVPR                | 6  | 160333229                                                                                                                                                                                                         | N-Term(iTRAQ4plex)                                                                                                   | 1769.90740 |    | 99  | 4.56 | Expt2 |
| TVQVPMPGPDGLPVDASAVSNNYIOTLGR | 2  | 146219835:146219830:146219849:146231979                                                                                                                                                                           | N-Term(iTRAQ4plex), M7(Oxidation)                                                                                    | 3156.61924 |    | 99  | 4.19 | Expt2 |
| ALLGPAPDEDEPAADDGPGDQALGAGEPR | 2  | 72384371                                                                                                                                                                                                          | N-Term(iTRAQ4plex)                                                                                                   | 3074.43454 |    | 98  | 3.47 | Expt2 |
| LCYVALDFEQEMATAASSSSLEK       | 5  | 6671509:6752954                                                                                                                                                                                                   | N-Term(iTRAQ4plex), C2(Methylthio), K23(iTRAQ4plex)                                                                  | 2827.34829 |    | 97  | 5.07 | Expt2 |
| SQPLTELDQDGTPMNAVSSPGMSQELR   | 5  | 6678615:283945493                                                                                                                                                                                                 | N-Term(iTRAQ4plex)                                                                                                   | 2843.40122 |    | 97  | 4.67 | Expt2 |

|                                 |   |                                                             |                                                                                                     |            |    |      |       |
|---------------------------------|---|-------------------------------------------------------------|-----------------------------------------------------------------------------------------------------|------------|----|------|-------|
| LFVSESGPSLPLVAAAAAR             | 4 | 51491852;284172357                                          | N-Term(iTRAQ4plex)                                                                                  | 1986.11882 | 97 | 4.23 | Expt2 |
| ENGTITAAANSTLNDGAAALVMTAEAAQR   | 2 | 21450129                                                    | N-Term(iTRAQ4plex), N2(Deamidated), M23(Oxidation)                                                  | 3106.55527 | 96 | 4.14 | Expt2 |
| MDATSYSSIASEFGVR                | 2 | 117606385                                                   | N-Term(iTRAQ4plex)                                                                                  | 1864.89287 | 95 | 4.33 | Expt2 |
| NFATSLYSMIK                     | 6 | 6753060                                                     | N-Term(iTRAQ4plex), K11(iTRAQ4plex)                                                                 | 1562.85369 | 94 | 0.98 | Expt2 |
| LVPVVDDEEEER                    | 1 | 66955886                                                    | N-Term(iTRAQ4plex)                                                                                  | 1784.87578 | 93 |      | Expt2 |
| FGIAQMVITDFOK                   | 4 | 6755202                                                     | N-Term(iTRAQ4plex), K14(iTRAQ4plex)                                                                 | 1902.00786 | 91 | 4.50 | Expt2 |
| GTVAASGAAGGGGGAGAGAPGGGR        | 2 | 31652266                                                    | N-Term(iTRAQ4plex)                                                                                  | 2084.03720 | 90 | 4.68 | Expt2 |
| QSQIQVFEDGADTTSPETPDSSASK       | 2 | 118601017                                                   | N-Term(iTRAQ4plex), K25(iTRAQ4plex)                                                                 | 2913.39566 | 90 | 4.87 | Expt2 |
| AVVYNTIQSMAIVK                  | 5 | 94410730;41054806                                           | N-Term(iTRAQ4plex), K16(iTRAQ4plex)                                                                 | 2025.16899 | 90 | 4.59 | Expt2 |
| MLPTIADNAGYSDADLVAQLR           | 3 | 126521835                                                   | N-Term(iTRAQ4plex), M1(Oxidation)                                                                   | 2507.29959 | 88 |      | Expt2 |
| NADMSEEMQDSEVCATQALEK           | 2 | 213688406                                                   | N-Term(iTRAQ4plex), M4(Oxidation), M8(Oxidation), C15(Methylthio), K22(iTRAQ4plex)                  | 2823.20652 | 88 | 3.56 | Expt2 |
| NADMSEEMQONSVECATQALEK          | 3 | 82998589                                                    | N-Term(iTRAQ4plex), M4(Oxidation), M8(Oxidation), N11(Deamidated), C15(Methylthio), K22(iTRAQ4plex) | 2823.20652 | 88 | 3.56 | Expt2 |
| LVTLPVFAQLK                     | 3 | 19527026                                                    | N-Term(iTRAQ4plex), K12(iTRAQ4plex)                                                                 | 1604.00981 | 87 | 3.69 | Expt2 |
| DAAGLESQLODTQELLOEETR           | 2 | 33598964                                                    | N-Term(iTRAQ4plex)                                                                                  | 2518.24527 | 87 | 5.47 | Expt2 |
| MDESEANEAPAGEAAAR               | 2 | 194328702;194328706;18700026;194328708                      | N-Term(iTRAQ4plex)                                                                                  | 1862.83476 | 87 | 4.02 | Expt2 |
| ALDTMNFVIVK                     | 2 | 6754972;31560656;255652857                                  | N-Term(iTRAQ4plex), K11(iTRAQ4plex)                                                                 | 1554.85637 | 87 | 3.97 | Expt2 |
| DNADGTYQVEYTPFEK                | 4 | 145966915                                                   | N-Term(iTRAQ4plex), K16(iTRAQ4plex)                                                                 | 2165.03472 | 87 | 4.10 | Expt2 |
| LLQDSVDFSLADINTEFK              | 2 | 31982755                                                    | N-Term(iTRAQ4plex), K19(iTRAQ4plex)                                                                 | 2414.27304 | 86 | 4.70 | Expt2 |
| DSLGDFFIEHYAQLGPSPEQLAAGAEEGGGR | 2 | 6755252                                                     | N-Term(iTRAQ4plex)                                                                                  | 3399.62766 | 86 | 4.56 | Expt2 |
| NDLGVGYLLLDNDSAK                | 4 | 125628659                                                   | N-Term(iTRAQ4plex), K17(iTRAQ4plex)                                                                 | 2052.09502 | 86 | 3.75 | Expt2 |
| GLVEPVDVVDNADGTOTVNVVPSR        | 4 | 125347376                                                   | N-Term(iTRAQ4plex)                                                                                  | 2688.36911 | 86 | 3.99 | Expt2 |
| YPGVSNYQVEEDIGK                 | 1 | 149259286;21450341                                          | N-Term(iTRAQ4plex), K15(iTRAQ4plex)                                                                 | 1986.00237 | 85 |      | Expt2 |
| IVLTNPVCTEVGEEK                 | 5 | 149271434;149274434;6753738;7242148                         | N-Term(iTRAQ4plex), C8(Methylthio), K14(iTRAQ4plex)                                                 | 1835.99065 | 85 | 4.14 | Expt2 |
| LOVEPAVDTSVGOVYGGIEGGVFR        | 6 | 125347376                                                   | N-Term(iTRAQ4plex), C14(Methylthio)                                                                 | 2896.41703 | 85 | 4.72 | Expt2 |
| IAIVGAGIGGTSSAYLIR              | 2 | 13385294                                                    | N-Term(iTRAQ4plex)                                                                                  | 1913.06595 | 85 | 3.79 | Expt2 |
| VDEILGFISEATPR                  | 4 | 121949760                                                   | N-Term(iTRAQ4plex)                                                                                  | 1805.94866 | 84 | 3.76 | Expt2 |
| LFTAESLIGLK                     | 2 | 148747410                                                   | N-Term(iTRAQ4plex), K11(iTRAQ4plex)                                                                 | 1479.90569 | 84 | 4.26 | Expt2 |
| GPAGPSGPVVK                     | 2 | 111120329                                                   | N-Term(iTRAQ4plex), K11(iTRAQ4plex)                                                                 | 1211.69878 | 83 |      | Expt2 |
| VATLEQSYEALCELAATR              | 2 | 55926122                                                    | N-Term(iTRAQ4plex), C12(Methylthio)                                                                 | 2158.07187 | 83 | 4.59 | Expt2 |
| LPACVVDCCGTGYTK                 | 3 | 23956227                                                    | N-Term(iTRAQ4plex), C4(Methylthio), C8(Methylthio), K14(iTRAQ4plex)                                 | 1806.85271 | 83 | 3.43 | Expt2 |
| SAMTSGVQSVMGSR                  | 4 | 13385312                                                    | N-Term(iTRAQ4plex)                                                                                  | 1541.75212 | 82 | 4.92 | Expt2 |
| LGESQTLQOFSR                    | 4 | 115496850                                                   | N-Term(iTRAQ4plex)                                                                                  | 1537.81304 | 82 | 3.50 | Expt2 |
| YLMEEDEDAYK                     | 2 | 149257749;149250073                                         | N-Term(iTRAQ4plex), K11(iTRAQ4plex)                                                                 | 1693.79057 | 82 | 3.96 | Expt2 |
| AIDLFTDAIK                      | 2 | 19526912                                                    | N-Term(iTRAQ4plex), K10(iTRAQ4plex)                                                                 | 1394.81914 | 82 | 3.40 | Expt2 |
| TLNEADCATVPPAIR                 | 3 | 54607098                                                    | N-Term(iTRAQ4plex), C7(Methylthio)                                                                  | 1760.88152 | 82 | 4.85 | Expt2 |
| LFSVPDFVGDACK                   | 4 | 239052674                                                   | N-Term(iTRAQ4plex), C12(Methylthio), K13(iTRAQ4plex)                                                | 1731.87505 | 82 | 3.46 | Expt2 |
| YPLSSLMYTASK                    | 6 | 225690566                                                   | N-Term(iTRAQ4plex), K12(iTRAQ4plex)                                                                 | 1648.89275 | 82 | 3.66 | Expt2 |
| SLAMLGSSDENTALSR                | 2 | 71043944                                                    | N-Term(iTRAQ4plex)                                                                                  | 1795.89922 | 81 | 3.43 | Expt2 |
| STPAITLENPDIK                   | 1 | 19745150                                                    | N-Term(iTRAQ4plex), K13(iTRAQ4plex)                                                                 | 1686.95366 | 81 |      | Expt2 |
| OEPLGSDSEGVNCLAYDEAIMAQDDR      | 2 | 149270309                                                   | N-Term(iTRAQ4plex), C13(Methylthio), M21(Oxidation)                                                 | 3045.34055 | 81 | 4.31 | Expt2 |
| VDINAPEVEVQGK                   | 2 | 61743961                                                    | N-Term(iTRAQ4plex), K13(iTRAQ4plex)                                                                 | 1685.94048 | 81 | 3.79 | Expt2 |
| GYSFSLTFSPSGK                   | 2 | 134031994                                                   | N-Term(iTRAQ4plex), K14(iTRAQ4plex)                                                                 | 1766.92375 | 81 | 4.20 | Expt2 |
| GALVIVNDLGGDFK                  | 1 | 31982273                                                    | N-Term(iTRAQ4plex), K14(iTRAQ4plex)                                                                 | 1705.98271 | 81 |      | Expt2 |
| FQDVPSAGGESVAGGGTAVATALDK       | 2 | 33563246                                                    | N-Term(iTRAQ4plex), K24(iTRAQ4plex)                                                                 | 2522.30857 | 81 | 4.04 | Expt2 |
| VIDVFAMPOSQGTGVSVEAVDPVFOAK     | 1 | 145966883                                                   | N-Term(iTRAQ4plex), K26(iTRAQ4plex)                                                                 | 2979.58133 | 81 |      | Expt2 |
| WNTDNTLGTETIATEDQICQGLK         | 2 | 6755965                                                     | N-Term(iTRAQ4plex), C18(Methylthio), K22(iTRAQ4plex)                                                | 2796.38340 | 81 | 5.22 | Expt2 |
| GDACDDMDGDGDIK                  | 2 | 6755781                                                     | N-Term(iTRAQ4plex), C4(Methylthio), K14(iTRAQ4plex)                                                 | 1760.70122 | 80 | 4.47 | Expt2 |
| LOSLEFSPDFSK                    | 2 | 117606335                                                   | N-Term(iTRAQ4plex), K12(iTRAQ4plex)                                                                 | 1685.91057 | 80 | 3.54 | Expt2 |
| AIDIYQVGTSAAMDSPLLK             | 2 | 13385392                                                    | N-Term(iTRAQ4plex), K19(iTRAQ4plex)                                                                 | 2339.24594 | 80 | 3.59 | Expt2 |
| ALEYIYNOELNETR                  | 2 | 36031035                                                    | N-Term(iTRAQ4plex)                                                                                  | 2001.00249 | 80 | 3.42 | Expt2 |
| SSTPLPTVSSAENR                  | 3 | 121949767;121949779;121949760;121949763;121949765;121949769 | N-Term(iTRAQ4plex)                                                                                  | 1777.90911 | 79 | 3.44 | Expt2 |

|                             |    |                                                                                                                |                                                                                       |            |  |    |      |      |       |
|-----------------------------|----|----------------------------------------------------------------------------------------------------------------|---------------------------------------------------------------------------------------|------------|--|----|------|------|-------|
| CVVVGDAVGK                  | 4  | 18875380;45592934;6753364;6679601;9625037;13489097;34328361                                                    | N-Term(iTRAQ4plex), C1(Methylthio), K11(iTRAQ4plex)                                   | 1337.71575 |  | 79 | 0.99 |      | Expt2 |
| GVLEGGWQADSTTR              | 2  | 114158691                                                                                                      | N-Term(iTRAQ4plex)                                                                    | 1691.85015 |  | 79 |      | 3.86 | Expt2 |
| ADAEGESDLENSR               | 2  | 227116327                                                                                                      | N-Term(iTRAQ4plex)                                                                    | 1536.69390 |  | 79 |      | 3.68 | Expt2 |
| AMGIMNSFVNDIFER             | 29 | 68131547;68226433;30061385;149264032;160420312;46049029;28316760;68226431;160420308;30089704;30061387-13386452 | N-Term(iTRAQ4plex), M5(Oxidation), N6(Deamidated), N10(Deamidated)                    | 1905.88616 |  | 79 |      | 5.63 | Expt2 |
| AVIFCLSADK                  | 1  | 9790219                                                                                                        | N-Term(iTRAQ4plex), C5(Methylthio), K10(iTRAQ4plex)                                   | 1400.74895 |  | 79 |      |      | Expt2 |
| FOAGNSWGYPIYNGTLK           | 3  | 9790161                                                                                                        | N-Term(iTRAQ4plex), N5(Deamidated), N14(Deamidated), K18(iTRAQ4plex)                  | 2263.12749 |  | 78 |      | 3.76 | Expt2 |
| DNLAQOSFMEOQANYTIOSLK       | 2  | 13386442                                                                                                       | N-Term(iTRAQ4plex), K21(iTRAQ4plex)                                                   | 2731.37125 |  | 78 |      | 3.83 | Expt2 |
| TVEVLEPEVTK                 | 1  | 164698474;84370256                                                                                             | N-Term(iTRAQ4plex), K11(iTRAQ4plex)                                                   | 1531.88848 |  | 78 |      |      | Expt2 |
| AVTGYNDPETGNIIISLFOAMNK     | 4  | 82950147;82950149;149264086                                                                                    | N-Term(iTRAQ4plex), M20(Oxidation), K22(iTRAQ4plex)                                   | 2687.36551 |  | 78 |      | 4.07 | Expt2 |
| YYTSASGDEMVSJK              | 1  | 6754254                                                                                                        | N-Term(iTRAQ4plex), K14(iTRAQ4plex)                                                   | 1838.91448 |  | 78 |      |      | Expt2 |
| EYESLAAALNGAR               | 2  | 226423935                                                                                                      | N-Term(iTRAQ4plex), N10(Deamidated)                                                   | 1509.76750 |  | 78 |      | 4.45 | Expt2 |
| DLSSVQTLTK                  | 2  | 115496850                                                                                                      | N-Term(iTRAQ4plex), K11(iTRAQ4plex)                                                   | 1492.89214 |  | 78 |      | 4.60 | Expt2 |
| ILGVVISAISEAAQYNPEPPPR      | 2  | 110227381                                                                                                      | N-Term(iTRAQ4plex)                                                                    | 2591.40415 |  | 78 |      | 4.44 | Expt2 |
| FFGLPQTGDLDDQNTIEMR         | 4  | 6678902                                                                                                        | N-Term(iTRAQ4plex)                                                                    | 2327.14945 |  | 78 |      | 3.67 | Expt2 |
| YLATADSSLLOQTNNLLOOMDK      | 2  | 226423935                                                                                                      | N-Term(iTRAQ4plex), K21(iTRAQ4plex)                                                   | 2655.40061 |  | 77 |      | 3.45 | Expt2 |
| ILGVWDEISLKG                | 2  | 130502130                                                                                                      | N-Term(iTRAQ4plex), K13(iTRAQ4plex)                                                   | 1718.99541 |  | 77 |      |      | Expt2 |
| DNADPYTWLVQGGGETK           | 4  | 111185907                                                                                                      | N-Term(iTRAQ4plex), K18(iTRAQ4plex)                                                   | 2236.11284 |  | 77 |      | 4.42 | Expt2 |
| EGDLLAAQAR                  | 2  | 9506843;162287370;161760667                                                                                    | N-Term(iTRAQ4plex)                                                                    | 1187.65276 |  | 77 |      | 3.62 | Expt2 |
| LDVATDNFFONPELYIR           | 5  | 149251004;86476044                                                                                             | N-Term(iTRAQ4plex)                                                                    | 2199.12741 |  | 77 | 1.13 | 4.01 | Expt2 |
| FFDDPMLLELAK                | 1  | 6755594;158508674                                                                                              | N-Term(iTRAQ4plex), K12(iTRAQ4plex)                                                   | 1726.93315 |  | 77 |      |      | Expt2 |
| EPELFTVAEGLR                | 1  | 7106303                                                                                                        | N-Term(iTRAQ4plex)                                                                    | 1632.87554 |  | 77 |      |      | Expt2 |
| FYTDPEAVK                   | 3  | 18266680                                                                                                       | N-Term(iTRAQ4plex), K10(iTRAQ4plex)                                                   | 1456.80132 |  | 77 |      | 3.56 | Expt2 |
| VANPSGNLTDITYVQDCDGTGYK     | 4  | 125347376                                                                                                      | N-Term(iTRAQ4plex), C16(Methylthio), K22(iTRAQ4plex)                                  | 2652.22556 |  | 76 |      | 4.45 | Expt2 |
| ATSNVFMFDQSQIQEFK           | 3  | 21728376;71037403;198278553                                                                                    | N-Term(iTRAQ4plex), K18(iTRAQ4plex)                                                   | 2379.18413 |  | 76 |      |      | Expt2 |
| NVDMLSSELVQYDEPIK           | 2  | 6679012                                                                                                        | N-Term(iTRAQ4plex), K18(iTRAQ4plex)                                                   | 2423.26792 |  | 76 |      | 5.16 | Expt2 |
| FLOASEDLK                   | 2  | 149262292                                                                                                      | N-Term(iTRAQ4plex), K10(iTRAQ4plex)                                                   | 1451.83916 |  | 76 |      |      | Expt2 |
| ALQLGTLSFAEALK              | 3  | 31981810                                                                                                       | N-Term(iTRAQ4plex), K15(iTRAQ4plex)                                                   | 1847.09502 |  | 76 |      | 3.93 | Expt2 |
| MYFPDVEFDIK                 | 4  | 61743961                                                                                                       | N-Term(iTRAQ4plex), K11(iTRAQ4plex)                                                   | 1691.86467 |  | 76 |      |      | Expt2 |
| YIAENGTDPINQPLSEQLIDIK      | 2  | 19527358                                                                                                       | N-Term(iTRAQ4plex), N5(Deamidated), K24(iTRAQ4plex)                                   | 3003.54599 |  | 76 |      | 4.52 | Expt2 |
| LFTALAGWSEVFTTGR            | 2  | 121949813                                                                                                      | N-Term(iTRAQ4plex)                                                                    | 1957.03166 |  | 76 |      | 4.92 | Expt2 |
| DIODSLTVSNEVOTAK            | 4  | 6671672                                                                                                        | N-Term(iTRAQ4plex), K16(iTRAQ4plex)                                                   | 2036.07268 |  | 76 |      | 3.88 | Expt2 |
| FATVOYSDDPQTEFGLDTLGSGSDTIR | 3  | 115647999                                                                                                      | N-Term(iTRAQ4plex)                                                                    | 3064.45841 |  | 76 |      | 4.51 | Expt2 |
| NAFACFDEEATGTOEDYLR         | 2  | 21728376                                                                                                       | N-Term(iTRAQ4plex), C5(Methylthio)                                                    | 2483.10678 |  | 76 |      | 3.72 | Expt2 |
| EALLGVOEDVDEYVK             | 2  | 114205428                                                                                                      | N-Term(iTRAQ4plex), K15(iTRAQ4plex)                                                   | 1995.05692 |  | 75 |      | 3.93 | Expt2 |
| SODAEVGDGTTSVTLAAEFLK       | 2  | 238814391                                                                                                      | N-Term(iTRAQ4plex), K22(iTRAQ4plex)                                                   | 2540.34098 |  | 75 |      | 4.99 | Expt2 |
| VCPFAGILENGIVR              | 3  | 160358825                                                                                                      | N-Term(iTRAQ4plex), C2(Methylthio), N10(Deamidated)                                   | 1678.88152 |  | 75 |      | 3.74 | Expt2 |
| YSOVLANGLDNK                | 3  | 6755368;149252587;149259085;149263957;149264584;149264635                                                      | N-Term(iTRAQ4plex), N7(Deamidated), K12(iTRAQ4plex)                                   | 1610.86150 |  | 75 |      | 3.65 | Expt2 |
| ASLNGADIYSGCCTLK            | 8  | 183980004                                                                                                      | N-Term(iTRAQ4plex), N4(Deamidated), C12(Methylthio), C13(Methylthio), K16(iTRAQ4plex) | 1996.90581 |  | 75 |      | 3.59 | Expt2 |
| LOQELDDATVDLGGQK            | 3  | 29336026                                                                                                       | N-Term(iTRAQ4plex), K16(iTRAQ4plex)                                                   | 2089.11577 |  | 75 |      | 3.78 | Expt2 |
| QFASQANMVGPIWQTK            | 2  | 11230802                                                                                                       | N-Term(iTRAQ4plex), K16(iTRAQ4plex)                                                   | 2094.10454 |  | 75 |      | 4.05 | Expt2 |
| SNLVDNTNQVEVLQR             | 2  | 26986593;170932536                                                                                             | N-Term(iTRAQ4plex)                                                                    | 1872.99529 |  | 75 |      | 3.91 | Expt2 |
| AVCMLSNNTAIAEAWAR           | 5  | 6755901;34740335;6678465;6678467;51765047;82930560;8394493;6678469                                             | N-Term(iTRAQ4plex), C3(Methylthio), M4(Oxidation)                                     | 2013.97002 |  | 75 | 1.02 | 3.62 | Expt2 |
| DMDLWEOQEEER                | 1  | 146219837                                                                                                      | N-Term(iTRAQ4plex)                                                                    | 1751.76689 |  | 75 |      |      | Expt2 |
| LSLEAEVSELK                 | 1  | 29336026                                                                                                       | N-Term(iTRAQ4plex), K11(iTRAQ4plex)                                                   | 1505.87358 |  | 75 |      |      | Expt2 |
| AVAVVVDPIQSVK               | 2  | 145966883                                                                                                      | N-Term(iTRAQ4plex), K13(iTRAQ4plex)                                                   | 1612.98760 |  | 75 |      | 3.62 | Expt2 |
| SVILEAFSSPEEVK              | 1  | 189409138                                                                                                      | N-Term(iTRAQ4plex), K15(iTRAQ4plex)                                                   | 1910.03496 |  | 75 |      |      | Expt2 |
| IYPLDDPSVPAPPR              | 3  | 149270772;149270774;153791796                                                                                  | N-Term(iTRAQ4plex)                                                                    | 1777.96611 |  | 75 |      |      | Expt2 |
| LPPLPVTPEMAGAGVAVVAVGEGVDR  | 2  | 33859662                                                                                                       | N-Term(iTRAQ4plex), M10(Oxidation)                                                    | 2633.41733 |  | 75 |      |      | Expt2 |
| LSQTFPMADFIEITK             | 40 | 163310765                                                                                                      | N-Term(iTRAQ4plex), N7(Deamidated), K15(iTRAQ4plex)                                   | 1971.04888 |  | 75 | 1.08 | 6.71 | Expt2 |
| AIAGINQPIYYQAGPDAALGR       | 4  | 39652626                                                                                                       | N-Term(iTRAQ4plex)                                                                    | 2580.34238 |  | 74 |      | 4.16 | Expt2 |

|                             |    |                                                   |                                                      |            |    |      |       |
|-----------------------------|----|---------------------------------------------------|------------------------------------------------------|------------|----|------|-------|
| NISFTVVDVGGQDK              | 2  | 6680718;6680716;6671571                           | N-Term(iTRAQ4plex), K14(iTRAQ4plex)                  | 1853.97698 | 74 |      | Expt2 |
| TPTVDVTVPEALNVDSPINIGGK     | 2  | 61743961                                          | N-Term(iTRAQ4plex), K25(iTRAQ4plex)                  | 2882.53081 | 74 |      | Expt2 |
| LOMEQQOQLQOR                | 2  | 149267360;149267836;31982091                      | N-Term(iTRAQ4plex)                                   | 1701.88225 | 74 | 3.84 | Expt2 |
| LLLPQOAGFGCCDR              | 2  | 160333729                                         | N-Term(iTRAQ4plex), C12(Methylthio)                  | 1736.85747 | 74 |      | Expt2 |
| ALGGIGPVDLLVNNALVIMOPFLEVTK | 2  | 6671688                                           | N-Term(iTRAQ4plex), M20(Oxidation), K28(iTRAQ4plex)  | 3196.83803 | 74 | 4.66 | Expt2 |
| AIELNAPANVYFCNR             | 2  | 21313588                                          | N-Term(iTRAQ4plex), C13(Methylthio)                  | 1884.92388 | 74 | 3.83 | Expt2 |
| IPELLSGGSVDSETR             | 1  | 6678101                                           | N-Term(iTRAQ4plex)                                   | 1703.89604 | 74 |      | Expt2 |
| AVVQVFEGTSGIDAK             | 1  | 19705578                                          | N-Term(iTRAQ4plex), K15(iTRAQ4plex)                  | 1809.00235 | 74 |      | Expt2 |
| SLVEASSGVSVLSLCEK           | 2  | 6755100                                           | N-Term(iTRAQ4plex), C16(Methylthio), K18(iTRAQ4plex) | 2129.11429 | 74 | 3.48 | Expt2 |
| VVELLADIVONSSLEDSQIEK       | 2  | 46593021                                          | N-Term(iTRAQ4plex), K21(iTRAQ4plex)                  | 2617.42673 | 74 | 4.80 | Expt2 |
| AMADPEVQIQIMSDPAMR          | 4  | 14389431                                          | N-Term(iTRAQ4plex)                                   | 2033.95818 | 74 | 4.10 | Expt2 |
| GQLGNWMSPEFQR               | 2  | 28077029                                          | N-Term(iTRAQ4plex)                                   | 1808.84551 | 74 | 3.81 | Expt2 |
| DDVSGFVDPGLVLQDAQALHEAGEK   | 2  | 149265291;22165408                                | N-Term(iTRAQ4plex), K25(iTRAQ4plex)                  | 2898.47953 | 74 | 5.45 | Expt2 |
| LLGQFTLIGIPPAPR             | 5  | 162461907                                         | N-Term(iTRAQ4plex)                                   | 1737.05998 | 74 | 3.54 | Expt2 |
| SIPTVNENLENVYLEVNELEK       | 60 | 160333372                                         | N-Term(iTRAQ4plex), N8(Deamidated), K21(iTRAQ4plex)  | 2799.43485 | 74 | 1.39 | 8.59  |
| YPLLQSIGONTEESTER           | 1  | 194306547;194306553;194306549;6678668             | N-Term(iTRAQ4plex)                                   | 2222.15256 | 74 |      | Expt2 |
| ELNVQVDDSYAR                | 2  | 9790167                                           | N-Term(iTRAQ4plex)                                   | 1552.77849 | 73 | 3.74 | Expt2 |
| EGLSTEENVMDVLER             | 2  | 110431378                                         | N-Term(iTRAQ4plex)                                   | 1733.86626 | 73 | 4.36 | Expt2 |
| DVSELTGFPEMLGGR             | 2  | 149234067                                         | N-Term(iTRAQ4plex), M11(Oxidation)                   | 1767.87554 | 73 |      | Expt2 |
| CDPIDFSNSPEARL              | 3  | 9507145;85702351                                  | N-Term(iTRAQ4plex), C1(Methylthio)                   | 1753.80181 | 73 |      | Expt2 |
| DLOOSIEAASDEEDLR            | 2  | 163644252                                         | N-Term(iTRAQ4plex)                                   | 1962.93596 | 73 | 3.71 | Expt2 |
| LLLINNAATLGDVSK             | 3  | 160333789                                         | N-Term(iTRAQ4plex), K15(iTRAQ4plex)                  | 1830.09917 | 73 | 4.67 | Expt2 |
| VEVTVYVLLMDAEGK             | 6  | 21313308;158186704                                | N-Term(iTRAQ4plex), K16(iTRAQ4plex)                  | 2041.07976 | 73 | 4.96 | Expt2 |
| EAFLENSTLSDQLPQPEER         | 2  | 145699091                                         | N-Term(iTRAQ4plex)                                   | 2347.16178 | 73 | 4.25 | Expt2 |
| LDILDTAGQEEFGAMR            | 3  | 165972315;6677819                                 | N-Term(iTRAQ4plex), M15(Oxidation)                   | 1925.94304 | 73 | 3.42 | Expt2 |
| LPETSLFETEETR               | 2  | 82916992;16716381;195963321                       | N-Term(iTRAQ4plex)                                   | 1695.85881 | 73 |      | Expt2 |
| DDGVFVQEVMMQNSPAAR          | 8  | 90403607;61743961                                 | N-Term(iTRAQ4plex), M10(Oxidation)                   | 2022.97038 | 73 | 5.01 | Expt2 |
| VPAYDLCSAESANLVLK           | 1  | 225543183                                         | N-Term(iTRAQ4plex), C7(Methylthio), K17(iTRAQ4plex)  | 2127.11496 | 73 |      | Expt2 |
| DVAWAPISGLPTSIASCSODGR      | 4  | 29150272                                          | N-Term(iTRAQ4plex), C18(Methylthio)                  | 2522.21848 | 73 | 3.50 | Expt2 |
| ITGEAFVQFASQELAEK           | 1  | 19527048                                          | N-Term(iTRAQ4plex), K17(iTRAQ4plex)                  | 2156.15586 | 73 |      | Expt2 |
| LSISGNYNLETLMSPLGITR        | 4  | 6678087                                           | N-Term(iTRAQ4plex), M13(Oxidation)                   | 2339.24192 | 73 | 5.13 | Expt2 |
| GMVDGPFVFDLITPK             | 2  | 209862992;6681219                                 | N-Term(iTRAQ4plex), K15(iTRAQ4plex)                  | 1929.99382 | 73 | 3.92 | Expt2 |
| DTPTQDWLVSVLPEGSR           | 2  | 42476274                                          | N-Term(iTRAQ4plex)                                   | 2173.09014 | 72 | 4.81 | Expt2 |
| TPMYGSQTPLQDGSR             | 1  | 22094123                                          | N-Term(iTRAQ4plex)                                   | 1781.86016 | 72 |      | Expt2 |
| GVGGVSVTSPPAR               | 2  | 41056093                                          | N-Term(iTRAQ4plex)                                   | 1377.76201 | 72 | 3.46 | Expt2 |
| EDAVASLTK                   | 1  | 160333372                                         | N-Term(iTRAQ4plex), K9(iTRAQ4plex)                   | 1207.69072 | 72 |      | Expt2 |
| TTPMLQLOPEEPSR              | 2  | 124487155                                         | N-Term(iTRAQ4plex)                                   | 1770.92021 | 72 | 3.40 | Expt2 |
| DDGLFSGDPNWFPPK             | 1  | 30519911                                          | N-Term(iTRAQ4plex), K14(iTRAQ4plex)                  | 1882.92595 | 72 |      | Expt2 |
| WLQTEVONPSVTSK              | 2  | 31982393                                          | N-Term(iTRAQ4plex), K14(iTRAQ4plex)                  | 1905.02812 | 72 | 3.95 | Expt2 |
| QEPLGSDSEGVNCLAYDEAIMAQDDR  | 4  | 149270309                                         | N-Term(iTRAQ4plex), C13(Methylthio)                  | 3029.34995 | 72 | 4.36 | Expt2 |
| VTSVAEALLSADSASR            | 2  | 7305619                                           | N-Term(iTRAQ4plex)                                   | 1720.92229 | 72 | 4.54 | Expt2 |
| DFIIFEAAPQETR               | 1  | 9790175                                           | N-Term(iTRAQ4plex)                                   | 1680.87578 | 72 |      | Expt2 |
| ITVTSEVPFSK                 | 2  | 149256880;149248848;149249070;149258340;149261616 | N-Term(iTRAQ4plex), K11(iTRAQ4plex)                  | 1495.87163 | 71 | 3.97 | Expt2 |
| DMSIQELAVLVSGQK             | 4  | 112421039                                         | N-Term(iTRAQ4plex), K15(iTRAQ4plex)                  | 1906.06218 | 71 | 3.90 | Expt2 |
| QFAAATIQTIGR                | 1  | 163310776                                         | N-Term(iTRAQ4plex)                                   | 1420.80290 | 71 |      | Expt2 |
| SVGDLETLAFDGR               | 2  | 42490751                                          | N-Term(iTRAQ4plex)                                   | 1523.78496 | 71 | 4.06 | Expt2 |
| GLGSTVQEIIDLTVK             | 3  | 31541909                                          | N-Term(iTRAQ4plex), K15(iTRAQ4plex)                  | 1805.03337 | 71 | 4.77 | Expt2 |
| SVGMIAGGTGITPMLQVIR         | 2  | 19745150                                          | N-Term(iTRAQ4plex), M14(Oxidation)                   | 2061.14316 | 71 | 4.28 | Expt2 |
| GEEPGQDDPVPQLLSGFPFR        | 2  | 22122591                                          | N-Term(iTRAQ4plex)                                   | 2213.10514 | 71 | 3.99 | Expt2 |
| TEEMVQTEEMETPR              | 3  | 157952206;284507286                               | N-Term(iTRAQ4plex)                                   | 1853.84075 | 71 | 1.05 | 4.64  |
| SEIDLNLK                    | 1  | 149265291;22165408                                | N-Term(iTRAQ4plex), K9(iTRAQ4plex)                   | 1332.80327 | 71 |      | Expt2 |
| DSSTSPGDYVLSVSENSR          | 2  | 31559995                                          | N-Term(iTRAQ4plex)                                   | 2043.95537 | 71 | 3.56 | Expt2 |
| AVLNPLCQVDYR                | 2  | 67906177                                          | N-Term(iTRAQ4plex), C7(Methylthio)                   | 1580.80339 | 71 | 3.88 | Expt2 |
| AVDVFPPPEAQDNFVAMQISEK      | 4  | 51491845                                          | N-Term(iTRAQ4plex), K23(iTRAQ4plex)                  | 2867.45670 | 70 | 4.59 | Expt2 |
| SEDEVGSLIEYFR               | 10 | 31982236                                          | N-Term(iTRAQ4plex)                                   | 1816.87493 | 70 | 4.06 | Expt2 |

|                              |   |                                                                                                                                                  |                                                                                                    |            |    |      |       |
|------------------------------|---|--------------------------------------------------------------------------------------------------------------------------------------------------|----------------------------------------------------------------------------------------------------|------------|----|------|-------|
| TLQIFNIEMK                   | 2 | 51491845                                                                                                                                         | N-Term(iTRAQ4plex), K10(iTRAQ4plex)                                                                | 1524.87688 | 70 | 3.46 | Expt2 |
| DOYELLCLDNTR                 | 4 | 20330802                                                                                                                                         | N-Term(iTRAQ4plex), C7(Methylthio)                                                                 | 1672.78325 | 70 | 3.54 | Expt2 |
| VLAGETLSVNDPPDVLDR           | 1 | 111607430;111607434;111607432;111607436                                                                                                          | N-Term(iTRAQ4plex)                                                                                 | 2054.09160 | 70 |      | Expt2 |
| SYYYAISDFAVGGR               | 3 | 153791270                                                                                                                                        | N-Term(iTRAQ4plex)                                                                                 | 1712.84368 | 70 | 3.40 | Expt2 |
| GVEGLIDIENPNR                | 2 | 84781781                                                                                                                                         | N-Term(iTRAQ4plex)                                                                                 | 1569.83928 | 70 | 4.01 | Expt2 |
| ILLLGAGESGK                  | 4 | 33563256;41054806;47271396;117959921;117959928;117959930;74271899;124487259;89001109;47271350;6680041;84000001;6754006;6680043;164607137;6754012 | N-Term(iTRAQ4plex), K11(iTRAQ4plex)                                                                | 1345.83818 | 70 | 3.63 | Expt2 |
| LIITPETPEPEAOPVGPQSR         | 2 | 31712006                                                                                                                                         | N-Term(iTRAQ4plex)                                                                                 | 2303.24485 | 70 | 4.28 | Expt2 |
| AGGGSIEVSVPR                 | 2 | 224922832                                                                                                                                        | N-Term(iTRAQ4plex)                                                                                 | 1272.70354 | 70 | 3.87 | Expt2 |
| NSILAQVLDQASR                | 1 | 149246587                                                                                                                                        | N-Term(iTRAQ4plex)                                                                                 | 1558.87004 | 70 |      | Expt2 |
| TTGFELMDGVK                  | 2 | 169234958;32129201;32129205                                                                                                                      | N-Term(iTRAQ4plex), K11(iTRAQ4plex)                                                                | 1485.78801 | 69 | 3.74 | Expt2 |
| DMILPEMVGSMVGVYNGK           | 3 | 6677799;94377390                                                                                                                                 | N-Term(iTRAQ4plex), M2(Oxidation), M8(Oxidation), M12(Oxidation), N17(Deamidated), K19(iTRAQ4plex) | 2390.19779 | 69 |      | Expt2 |
| SNDPVAVAFADMLK               | 3 | 8394460                                                                                                                                          | N-Term(iTRAQ4plex), K14(iTRAQ4plex)                                                                | 1765.95122 | 69 | 3.51 | Expt2 |
| LFPPDPSPLPVSSR               | 2 | 148222073;147898671                                                                                                                              | N-Term(iTRAQ4plex)                                                                                 | 1670.88970 | 69 |      | Expt2 |
| GQLEANLQVLEK                 | 6 | 124249090                                                                                                                                        | N-Term(iTRAQ4plex), K13(iTRAQ4plex)                                                                | 1743.03484 | 69 | 4.09 | Expt2 |
| OGIPFVGQVLLVDGR              | 2 | 148277039                                                                                                                                        | N-Term(iTRAQ4plex), O1(Deamidated), O8(Deamidated)                                                 | 1743.99346 | 69 | 3.92 | Expt2 |
| LALETTVLVESYLPDGR            | 2 | 22122825                                                                                                                                         | N-Term(iTRAQ4plex)                                                                                 | 2121.16147 | 69 | 4.05 | Expt2 |
| EIADGLCLEVEGK                | 4 | 149255389                                                                                                                                        | N-Term(iTRAQ4plex), C7(Methylthio), K13(iTRAQ4plex)                                                | 1709.87139 | 69 | 3.59 | Expt2 |
| EIANGLCLEVEGK                | 4 | 82922656                                                                                                                                         | N-Term(iTRAQ4plex), N4(Deamidated), C7(Methylthio), K13(iTRAQ4plex)                                | 1709.87139 | 69 | 3.59 | Expt2 |
| VVLAADLGTAEAGVQR             | 2 | 160333789                                                                                                                                        | N-Term(iTRAQ4plex)                                                                                 | 1713.96659 | 69 |      | Expt2 |
| IESDAQEPAEPEDDLDIMLGNK       | 2 | 14149756                                                                                                                                         | N-Term(iTRAQ4plex), K22(iTRAQ4plex)                                                                | 2717.31260 | 69 | 4.90 | Expt2 |
| ETVGDLEAMNEMNDELQENAR        | 2 | 118601017                                                                                                                                        | N-Term(iTRAQ4plex)                                                                                 | 2552.14542 | 69 | 3.83 | Expt2 |
| LPVNVENDELVAIAR              | 2 | 149259047;31981382                                                                                                                               | N-Term(iTRAQ4plex)                                                                                 | 1923.10764 | 69 | 4.28 | Expt2 |
| EILSOEALPAPLGPQGGTAGDQQOQVLR | 4 | 22122725                                                                                                                                         | N-Term(iTRAQ4plex)                                                                                 | 3089.64109 | 68 | 4.01 | Expt2 |
| ITISDCGQL                    | 3 | 149257773;6679439                                                                                                                                | N-Term(iTRAQ4plex), C6(Methylthio)                                                                 | 1139.55766 | 68 |      | Expt2 |
| SSLOYSSPAPGGCGDQTLGDLILLTPTR | 1 | 93102415                                                                                                                                         | N-Term(iTRAQ4plex), C13(Methylthio)                                                                | 2924.43198 | 68 |      | Expt2 |
| IVEVDVDANSLNSNDTFVLK         | 1 | 226246550                                                                                                                                        | N-Term(iTRAQ4plex), K20(iTRAQ4plex)                                                                | 2480.32157 | 68 |      | Expt2 |
| VCTTAGGVPTLPSDDTSPGPR        | 3 | 115647999                                                                                                                                        | N-Term(iTRAQ4plex), C2(Methylthio)                                                                 | 2317.13614 | 68 | 3.70 | Expt2 |
| LFIGGLPNYLNDDOVK             | 5 | 164565377                                                                                                                                        | N-Term(iTRAQ4plex), K16(iTRAQ4plex)                                                                | 2094.15708 | 68 | 3.88 | Expt2 |
| LOEYFVSAAGADH                | 1 | 31982664                                                                                                                                         | N-Term(iTRAQ4plex)                                                                                 | 1608.78191 | 68 |      | Expt2 |
| EPIMPAPGOEETVR               | 1 | 225543157;225543168                                                                                                                              | N-Term(iTRAQ4plex)                                                                                 | 1697.86528 | 68 |      | Expt2 |
| YOAVTATLEEK                  | 2 | 31981945;94400480;51771609                                                                                                                       | N-Term(iTRAQ4plex), K11(iTRAQ4plex)                                                                | 1540.85332 | 68 | 3.45 | Expt2 |
| APNSPDVLEIEFK                | 1 | 6996911                                                                                                                                          | N-Term(iTRAQ4plex), K13(iTRAQ4plex)                                                                | 1746.95598 | 68 |      | Expt2 |
| AFLEVLAK                     | 7 | 111074529                                                                                                                                        | N-Term(iTRAQ4plex), K8(iTRAQ4plex)                                                                 | 1178.73296 | 68 | 3.55 | Expt2 |
| DVFCNVGNLQPGAK               | 2 | 225543183                                                                                                                                        | N-Term(iTRAQ4plex), C5(Methylthio), K15(iTRAQ4plex)                                                | 1882.93869 | 68 | 4.05 | Expt2 |
| ENLOVFGQLSPEDMK              | 2 | 171846276                                                                                                                                        | N-Term(iTRAQ4plex), K16(iTRAQ4plex)                                                                | 2170.11142 | 68 | 3.49 | Expt2 |
| ITQSSLTICFPEYTGANK           | 4 | 149260278;41054806                                                                                                                               | N-Term(iTRAQ4plex), C9(Methylthio), K18(iTRAQ4plex)                                                | 2307.16587 | 68 | 4.51 | Expt2 |
| LVIYVDPVMGDK                 | 3 | 26006861                                                                                                                                         | N-Term(iTRAQ4plex), C5(Methylthio), K12(iTRAQ4plex)                                                | 1672.84392 | 68 |      | Expt2 |
| LLLGAQAVAYGVR                | 3 | 126723336                                                                                                                                        | N-Term(iTRAQ4plex)                                                                                 | 1403.85367 | 68 | 3.44 | Expt2 |
| GAWPVQVSLOR                  | 2 | 84794609                                                                                                                                         | N-Term(iTRAQ4plex)                                                                                 | 1471.79082 | 68 |      | Expt2 |
| IASNAGSIA                    | 9 | 12584986;149272300                                                                                                                               | N-Term(iTRAQ4plex)                                                                                 | 947.52861  | 67 |      | Expt2 |
| TSGTVEDDLIFPDDCEFK           | 3 | 149251337;149251339;31981027                                                                                                                     | N-Term(iTRAQ4plex), C16(Methylthio), K19(iTRAQ4plex)                                               | 2478.16631 | 67 | 4.71 | Expt2 |
| EGHESGDPGTDGGR               | 2 | 125628659                                                                                                                                        | N-Term(iTRAQ4plex)                                                                                 | 1548.69365 | 67 |      | Expt2 |
| LEIGVQSVYEDVAR               | 2 | 33469023                                                                                                                                         | N-Term(iTRAQ4plex)                                                                                 | 1721.91106 | 67 | 3.55 | Expt2 |
| VPFGSDPTLQCR                 | 1 | 50845420                                                                                                                                         | N-Term(iTRAQ4plex), C13(Methylthio)                                                                | 1753.80193 | 67 |      | Expt2 |
| TLVSTVGSVMFSEGAQR            | 1 | 124486712                                                                                                                                        | N-Term(iTRAQ4plex)                                                                                 | 2042.04197 | 67 |      | Expt2 |
| SFVLPVENPQDVSSQVISESEVR      | 2 | 163965368                                                                                                                                        | N-Term(iTRAQ4plex)                                                                                 | 2776.42160 | 67 |      | Expt2 |
| LOEVPHEGPMCDLLWSDPDDR        | 2 | 8394024;149258657;9506983                                                                                                                        | N-Term(iTRAQ4plex), C11(Methylthio)                                                                | 2642.18003 | 67 | 4.17 | Expt2 |
| IGVLITDGK                    | 1 | 111074529                                                                                                                                        | N-Term(iTRAQ4plex), K9(iTRAQ4plex)                                                                 | 1203.75334 | 67 |      | Expt2 |
| AWVEQEGSVK                   | 1 | 149265291;22165408                                                                                                                               | N-Term(iTRAQ4plex), K11(iTRAQ4plex)                                                                | 1519.84368 | 67 |      | Expt2 |
| DFFFQNPQYFVEK                | 3 | 6680846                                                                                                                                          | N-Term(iTRAQ4plex), K14(iTRAQ4plex)                                                                | 2050.05864 | 67 | 3.89 | Expt2 |
| SALASVIMGLSPILGK             | 1 | 8394027                                                                                                                                          | N-Term(iTRAQ4plex), M8(Oxidation), K16(iTRAQ4plex)                                                 | 1861.11124 | 67 |      | Expt2 |
| AITIAGVPSQVTECVK             | 4 | 6754994                                                                                                                                          | N-Term(iTRAQ4plex), C14(Methylthio), K16(iTRAQ4plex)                                               | 1950.06963 | 67 | 3.75 | Expt2 |

|                             |   |                                                 |                                                      |            |    |      |       |       |
|-----------------------------|---|-------------------------------------------------|------------------------------------------------------|------------|----|------|-------|-------|
| GYAVTFITEDQAR               | 2 | 149264152;160420299                             | N-Term(iTRAQ4plex)                                   | 1678.82378 | 67 | 4.82 | Expt2 |       |
| DYAAYNVLDDPELR              | 3 | 21312153                                        | N-Term(iTRAQ4plex)                                   | 1797.88567 | 67 | 4.30 | Expt2 |       |
| MTVNESEQLVSCSMDDTVR         | 1 | 6755995                                         | N-Term(iTRAQ4plex), C12(Methylthio)                  | 2334.02178 | 67 |      | Expt2 |       |
| NVMSAFGLTDDQVSGPPSAPTEDR    | 2 | 9790261                                         | N-Term(iTRAQ4plex), M3(Oxidation)                    | 2651.24137 | 67 |      | Expt2 |       |
| ILEVNVQVQDEER               | 2 | 160333729                                       | N-Term(iTRAQ4plex)                                   | 1714.90886 | 67 | 4.13 | Expt2 |       |
| DLLLDPAWEK                  | 2 | 61097906;11230802;7304855;157951643             | N-Term(iTRAQ4plex), K10(iTRAQ4plex)                  | 1487.83684 | 67 |      | Expt2 |       |
| LLDEVFSEK                   | 6 | 6755196                                         | N-Term(iTRAQ4plex), K10(iTRAQ4plex)                  | 1514.83965 | 67 | 3.81 | Expt2 |       |
| TMLESAGGLIOTAR              | 2 | 227116327                                       | N-Term(iTRAQ4plex)                                   | 1591.85739 | 67 | 4.14 | Expt2 |       |
| EYIPTVFDNYSAQSVAVDGR        | 2 | 9625037                                         | N-Term(iTRAQ4plex)                                   | 2276.10221 | 66 | 4.10 | Expt2 |       |
| LTPYEVDELRL                 | 2 | 40068493;93587673;40068491                      | N-Term(iTRAQ4plex)                                   | 1378.73174 | 66 | 3.64 | Expt2 |       |
| NGETGPOGPPGPTGPAGDK         | 1 | 226423933                                       | N-Term(iTRAQ4plex), N1(Deamidated), K19(iTRAQ4plex)  | 2022.99309 | 66 |      | Expt2 |       |
| LFQVEYAEIAIK                | 4 | 7106387;94388526;94388799                       | N-Term(iTRAQ4plex), K12(iTRAQ4plex)                  | 1711.99211 | 66 | 3.46 | Expt2 |       |
| SYTITGLQPGTDYK              | 2 | 46849812                                        | N-Term(iTRAQ4plex), K14(iTRAQ4plex)                  | 1831.97038 | 66 | 3.77 | Expt2 |       |
| SLFSSIGEVSAS                | 1 | 31542602                                        | N-Term(iTRAQ4plex), K13(iTRAQ4plex)                  | 1641.90129 | 66 |      | Expt2 |       |
| TOYSSAMLESLLPGIR            | 4 | 68226731                                        | N-Term(iTRAQ4plex)                                   | 1910.02104 | 66 | 3.62 | Expt2 |       |
| VEGFPTIYFAPSGDK             | 5 | 86198316                                        | N-Term(iTRAQ4plex), K15(iTRAQ4plex)                  | 1916.00456 | 66 | 3.73 | Expt2 |       |
| GVIDMGNLSLIER               | 6 | 115496850                                       | N-Term(iTRAQ4plex)                                   | 1447.77617 | 66 | 3.80 | Expt2 |       |
| IVNDNIPYNGTAIFTTNGATAR      | 2 | 19527258                                        | N-Term(iTRAQ4plex), N9(Deamidated), N17(Deamidated)  | 2413.18283 | 66 | 4.63 | Expt2 |       |
| SALPAQSAATLPAR              | 1 | 117938332                                       | N-Term(iTRAQ4plex)                                   | 1497.85076 | 66 |      | Expt2 |       |
| GEIAGPPDTPYEGGR             | 1 | 31542956                                        | N-Term(iTRAQ4plex)                                   | 1659.81328 | 66 |      | Expt2 |       |
| DAAAEYDELAEPQDFODDPDIVAFR   | 2 | 13385798                                        | N-Term(iTRAQ4plex)                                   | 2984.37357 | 66 | 3.88 | Expt2 |       |
| LTSLVPFVDAFQLER             | 1 | 146219837                                       | N-Term(iTRAQ4plex)                                   | 1879.04961 | 66 |      | Expt2 |       |
| GEELLSPLNLEQAAYAR           | 1 | 149262184;124494242;124494244                   | N-Term(iTRAQ4plex)                                   | 2018.07108 | 66 |      | Expt2 |       |
| TVLELQYVLDK                 | 2 | 42558248;162329568;162329566                    | N-Term(iTRAQ4plex), K11(iTRAQ4plex)                  | 1608.95391 | 66 | 3.67 | Expt2 |       |
| LLQDFNGK                    | 2 | 50345978;31981690                               | N-Term(iTRAQ4plex), N7(Deamidated), K9(iTRAQ4plex)   | 1370.75835 | 66 |      | Expt2 |       |
| ASSSILINEAEPTNIQIR          | 4 | 38198665                                        | N-Term(iTRAQ4plex)                                   | 2201.19468 | 65 | 0.99 | 3.97  | Expt2 |
| VLSYAPGLDNDMQOLAR           | 3 | 160333789                                       | N-Term(iTRAQ4plex), M13(Oxidation)                   | 2148.09116 | 65 | 3.71 | Expt2 |       |
| DVDAAYMKN                   | 3 | 20911031;54607171;47523977;269914154            | N-Term(iTRAQ4plex), M7(Oxidation), K9(iTRAQ4plex)    | 1330.65788 | 65 |      | Expt2 |       |
| IQCSFDASGTLAPER             | 2 | 86439989                                        | N-Term(iTRAQ4plex), C3(Methylthio)                   | 1784.84905 | 65 | 3.64 | Expt2 |       |
| CDLEIQANGR                  | 4 | 6678329                                         | N-Term(iTRAQ4plex), C1(Methylthio), N8(Deamidated)   | 1309.60100 | 65 |      | Expt2 |       |
| GSEVNVIGIGTSVVTCPK          | 2 | 31982089                                        | N-Term(iTRAQ4plex), C16(Methylthio), K18(iTRAQ4plex) | 2094.12741 | 65 | 4.30 | Expt2 |       |
| LAVEALSSLDGDLGR             | 2 | 10946574                                        | N-Term(iTRAQ4plex)                                   | 1746.93974 | 65 |      | Expt2 |       |
| TIPGTALVEMGDEYAVER          | 4 | 110347535                                       | N-Term(iTRAQ4plex)                                   | 2095.05686 | 65 | 4.65 | Expt2 |       |
| IMLNTPEDVOALVSGK            | 4 | 134053905                                       | N-Term(iTRAQ4plex), K16(iTRAQ4plex)                  | 2003.11374 | 65 | 4.96 | Expt2 |       |
| CVGVGESDGIWNPDGIDPK         | 2 | 6680027                                         | N-Term(iTRAQ4plex), C1(Methylthio), K20(iTRAQ4plex)  | 2379.12065 | 65 |      | Expt2 |       |
| TYVTAPGTGFPLPGDTAR          | 1 | 84662768                                        | N-Term(iTRAQ4plex)                                   | 1867.96843 | 65 |      | Expt2 |       |
| ISMPEIDLNLK                 | 5 | 61743961                                        | N-Term(iTRAQ4plex), M3(Oxidation), K11(iTRAQ4plex)   | 1576.89141 | 65 | 3.44 | Expt2 |       |
| DMDLIDVNEAFAPQFLSVQK        | 5 | 29126205                                        | N-Term(iTRAQ4plex), M2(Oxidation), K20(iTRAQ4plex)   | 2584.33133 | 65 | 3.77 | Expt2 |       |
| LPEADDIQYPSMILLTADHDDR      | 2 | 6755152                                         | N-Term(iTRAQ4plex)                                   | 2672.29685 | 65 | 4.43 | Expt2 |       |
| DSDSILETLOR                 | 4 | 110625954                                       | N-Term(iTRAQ4plex)                                   | 1420.74199 | 65 | 3.75 | Expt2 |       |
| QEEVENLNEVYR                | 2 | 110735428;110735426                             | N-Term(iTRAQ4plex)                                   | 1665.82244 | 65 | 4.00 | Expt2 |       |
| TLTPAAQMEGFLNR              | 1 | 117938332                                       | N-Term(iTRAQ4plex), M9(Oxidation)                    | 1837.92803 | 65 |      | Expt2 |       |
| FETLEPEMNALAAAR             | 1 | 55926127                                        | N-Term(iTRAQ4plex), M8(Oxidation)                    | 1751.87981 | 64 |      | Expt2 |       |
| SELDVGNFAEEFTR              | 1 | 9910454                                         | N-Term(iTRAQ4plex)                                   | 1757.85076 | 64 |      | Expt2 |       |
| VAGPOPAQTGAPOGSLGEYLFER     | 2 | 82935680;149264343;149264482;82982537;130485277 | N-Term(iTRAQ4plex)                                   | 2517.29679 | 64 | 4.41 | Expt2 |       |
| MIQALELDPNLYR               | 2 | 29336026                                        | N-Term(iTRAQ4plex), M1(Oxidation)                    | 1735.92314 | 64 |      | Expt2 |       |
| YLFNQLFGEEDADOEVSPDR        | 1 | 7709986                                         | N-Term(iTRAQ4plex)                                   | 2516.18479 | 64 |      | Expt2 |       |
| TLLENTAITGR                 | 1 | 115385968;115385966                             | N-Term(iTRAQ4plex)                                   | 1445.84844 | 64 |      | Expt2 |       |
| IIGLDQVAGMSETALPGAFK        | 2 | 114326446                                       | N-Term(iTRAQ4plex), M10(Oxidation), K20(iTRAQ4plex)  | 2322.27427 | 64 | 4.62 | Expt2 |       |
| YVDIAIPCNNK                 | 4 | 149251929;149252176;149270876                   | N-Term(iTRAQ4plex), C8(Methylthio), K11(iTRAQ4plex)  | 1583.82390 | 64 | 3.57 | Expt2 |       |
| LEDGTEFDSSLPQNPVFLSGLTGOVIK | 3 | 6679805                                         | N-Term(iTRAQ4plex), K28(iTRAQ4plex)                  | 3341.70920 | 64 | 3.91 | Expt2 |       |
| LNPTQGLIDYDQALALTAR         | 3 | 21312298                                        | N-Term(iTRAQ4plex)                                   | 2146.16928 | 64 | 3.86 | Expt2 |       |
| VICPLPSASSIVAPTELRL         | 4 | 110625833                                       | N-Term(iTRAQ4plex), C3(Methylthio)                   | 2130.14811 | 64 |      | Expt2 |       |
| GLAITVSDENDAK               | 1 | 9790069                                         | N-Term(iTRAQ4plex), K14(iTRAQ4plex)                  | 1767.94487 | 64 |      | Expt2 |       |

|                             |    |                                                                                    |                                                                                     |            |    |      |       |
|-----------------------------|----|------------------------------------------------------------------------------------|-------------------------------------------------------------------------------------|------------|----|------|-------|
| GIPGPEGEPGPPGDPGLTECDVMTYVR | 4  | 22203747                                                                           | N-Term(iTRAQ4plex), C20(Methylthio), M23(Oxidation)                                 | 2946.34714 | 64 | 3.86 | Expt2 |
| LSSEQLNPSVFLVGLR            | 2  | 194440742                                                                          | N-Term(iTRAQ4plex)                                                                  | 1789.99907 | 64 | 3.77 | Expt2 |
| DLVPDLNRYAQYK               | 1  | 34328286                                                                           | N-Term(iTRAQ4plex), K14(iTRAQ4plex)                                                 | 1961.03948 | 64 |      | Expt2 |
| SPSGGAAGPLLTSPSLDGSR        | 8  | 123701966                                                                          | N-Term(iTRAQ4plex)                                                                  | 2099.08550 | 64 | 4.91 | Expt2 |
| FQOLANTNLSGDNLADILPR        | 2  | 145699091                                                                          | N-Term(iTRAQ4plex)                                                                  | 2344.24344 | 64 | 3.53 | Expt2 |
| VVLPFFILEK                  | 1  | 149260506;22507367                                                                 | N-Term(iTRAQ4plex), K10(iTRAQ4plex)                                                 | 1446.92266 | 64 |      | Expt2 |
| FGDAVQSDMK                  | 1  | 124339829;124339826                                                                | N-Term(iTRAQ4plex), K11(iTRAQ4plex)                                                 | 1484.76885 | 64 |      | Expt2 |
| AGAYDFPSPWDVTVTPEAK         | 2  | 85362742;70906477;18158420;85362729;28916677;149265235;70906479;75991700;226693349 | N-Term(iTRAQ4plex), K19(iTRAQ4plex)                                                 | 2369.16007 | 64 | 3.87 | Expt2 |
| VLSPELLFALAR                | 2  | 124377998                                                                          | N-Term(iTRAQ4plex)                                                                  | 1472.90080 | 64 | 3.61 | Expt2 |
| GSVYTAOSDVQVPENESIK         | 2  | 27734847                                                                           | N-Term(iTRAQ4plex), K19(iTRAQ4plex)                                                 | 2339.20182 | 64 | 3.66 | Expt2 |
| FVFSLVDAMNGK                | 3  | 31982186                                                                           | N-Term(iTRAQ4plex), N10(Deamidated), K12(iTRAQ4plex)                                | 1616.87065 | 64 | 3.88 | Expt2 |
| TCGDFDSGALEDISK             | 2  | 6754036                                                                            | N-Term(iTRAQ4plex), C2(Methylthio), K15(iTRAQ4plex)                                 | 1923.91166 | 64 | 3.78 | Expt2 |
| IALMPLFOAEK                 | 1  | 12963633                                                                           | N-Term(iTRAQ4plex), K11(iTRAQ4plex)                                                 | 1548.91387 | 63 |      | Expt2 |
| ELIPOYLAELOSPEEMAR          | 2  | 28077067                                                                           | N-Term(iTRAQ4plex)                                                                  | 2261.16648 | 63 | 4.00 | Expt2 |
| MOQVEASLOPETLR              | 4  | 124517726;86476056;160333710;6680586;130503301;148747546;269973939                 | N-Term(iTRAQ4plex), M1(Oxidation)                                                   | 1789.92790 | 63 | 5.07 | Expt2 |
| QLOALSSELAOAR               | 3  | 157277948                                                                          | N-Term(iTRAQ4plex)                                                                  | 1558.86545 | 63 | 3.80 | Expt2 |
| ESLVVNYEDLAAR               | 1  | 172088119                                                                          | N-Term(iTRAQ4plex)                                                                  | 1622.85356 | 63 |      | Expt2 |
| DGFIIDLMEK                  | 1  | 149253239;31981086;13386360                                                        | N-Term(iTRAQ4plex), K10(iTRAQ4plex)                                                 | 1468.80730 | 63 |      | Expt2 |
| LYVGLPEEQAVTVLDR            | 3  | 42490751                                                                           | N-Term(iTRAQ4plex)                                                                  | 2003.09964 | 63 |      | Expt2 |
| ASYISSAQLDOPDPGAVAAAAIFR    | 1  | 21703976                                                                           | N-Term(iTRAQ4plex)                                                                  | 2563.33554 | 63 |      | Expt2 |
| GEAGIPAEFISIWTR             | 3  | 145966915                                                                          | N-Term(iTRAQ4plex)                                                                  | 1677.87737 | 63 | 3.70 | Expt2 |
| SIPDPVPTYQDPLYLEDQVPR       | 3  | 30725847                                                                           | N-Term(iTRAQ4plex)                                                                  | 2687.37430 | 63 |      | Expt2 |
| FTGLOYLR                    | 34 | 160333372                                                                          | N-Term(iTRAQ4plex)                                                                  | 1141.64905 | 63 |      | Expt2 |
| TGSQYDIDGDAIDK              | 1  | 82950147;82950149;149264086                                                        | N-Term(iTRAQ4plex), K13(iTRAQ4plex)                                                 | 1741.89031 | 63 |      | Expt2 |
| GOVFDVGPR                   | 3  | 6754632                                                                            | N-Term(iTRAQ4plex)                                                                  | 1118.60759 | 63 |      | Expt2 |
| QEEEAALGEEAEAR              | 1  | 29336026                                                                           | N-Term(iTRAQ4plex)                                                                  | 1774.86638 | 63 |      | Expt2 |
| ALYSNIGGEENTYLWR            | 3  | 149258501;19526818                                                                 | N-Term(iTRAQ4plex)                                                                  | 2086.07182 | 63 | 3.99 | Expt2 |
| NYPATFWWNPQFK               | 6  | 16033229                                                                           | N-Term(iTRAQ4plex), K13(iTRAQ4plex)                                                 | 1900.00286 | 63 | 4.20 | Expt2 |
| EATTEFSVDAR                 | 2  | 125347376                                                                          | N-Term(iTRAQ4plex)                                                                  | 1369.67388 | 63 | 3.69 | Expt2 |
| GFOEVTIPNIFNSR              | 2  | 27229277                                                                           | N-Term(iTRAQ4plex)                                                                  | 1751.92095 | 63 | 3.55 | Expt2 |
| MLVDDIGDVTITNDGATILK        | 2  | 110625624                                                                          | N-Term(iTRAQ4plex), K20(iTRAQ4plex)                                                 | 2392.29416 | 62 | 3.55 | Expt2 |
| LAEICLIGIDDEAK              | 1  | 110625833                                                                          | N-Term(iTRAQ4plex), C5(Methylthio), K13(iTRAQ4plex)                                 | 1723.89292 | 62 |      | Expt2 |
| VTDSSVSQVLR                 | 2  | 124487435                                                                          | N-Term(iTRAQ4plex)                                                                  | 1334.73747 | 62 | 3.71 | Expt2 |
| MSVQPTVSLGGFEITPPVVLRL      | 3  | 149251776;94385641;6679108;94388148                                                | N-Term(iTRAQ4plex), M1(Oxidation)                                                   | 2387.32413 | 62 | 4.39 | Expt2 |
| VFANAPDSACVIGLR             | 2  | 31560653                                                                           | N-Term(iTRAQ4plex), C10(Methylthio)                                                 | 1722.88335 | 62 |      | Expt2 |
| FVAPEEVLPTFEGDILEK          | 2  | 21703888                                                                           | N-Term(iTRAQ4plex), K18(iTRAQ4plex)                                                 | 2321.25785 | 62 | 4.04 | Expt2 |
| CDACPVGFTGPMVQGVGINFAK      | 3  | 6755781                                                                            | C1(Methylthio), N-Term(iTRAQ4plex), C4(Methylthio), M12(Oxidation), K22(iTRAQ4plex) | 2607.22098 | 62 | 3.99 | Expt2 |
| FSPLTANLMLLAENGR            | 1  | 149251053;51766932                                                                 | N-Term(iTRAQ4plex), M9(Oxidation)                                                   | 2021.06487 | 62 |      | Expt2 |
| APDAWDYSGFVNEEMIR           | 3  | 19745150                                                                           | N-Term(iTRAQ4plex), M16(Oxidation)                                                  | 2288.04911 | 62 | 4.01 | Expt2 |
| TVOIEASTVEIEER              | 4  | 6754816;228480253                                                                  | N-Term(iTRAQ4plex)                                                                  | 1747.92020 | 62 | 3.72 | Expt2 |
| VPDNIIEGPEK                 | 1  | 61743961                                                                           | N-Term(iTRAQ4plex), K12(iTRAQ4plex)                                                 | 1541.84392 | 62 |      | Expt2 |
| AIAGQGVDYDTIVDVLNTR         | 2  | 145864475                                                                          | N-Term(iTRAQ4plex)                                                                  | 2164.14482 | 61 |      | Expt2 |
| GITGVDLFGTTDAVVK            | 2  | 226823359                                                                          | N-Term(iTRAQ4plex), K16(iTRAQ4plex)                                                 | 1881.06168 | 61 | 4.26 | Expt2 |
| VPPETIDSVIVGNVMOSSDAAYLAR   | 1  | 29126205                                                                           | N-Term(iTRAQ4plex)                                                                  | 2863.46848 | 61 |      | Expt2 |
| MDLAGDSGDVWSLAELR           | 3  | 188035858                                                                          | N-Term(iTRAQ4plex)                                                                  | 1978.97185 | 61 | 3.41 | Expt2 |
| AIEVLOSSGLPVDGFYQEVLR       | 2  | 13385098                                                                           | N-Term(iTRAQ4plex)                                                                  | 2452.28501 | 61 | 3.64 | Expt2 |
| ILTDGWFEAR                  | 2  | 158937304                                                                          | N-Term(iTRAQ4plex)                                                                  | 1479.77251 | 61 | 3.48 | Expt2 |
| LSDDNTIGQEEIQQR             | 4  | 115496850                                                                          | N-Term(iTRAQ4plex)                                                                  | 1889.93389 | 61 | 3.76 | Expt2 |
| VMVELLSYTEDNASQAR           | 2  | 21703762                                                                           | N-Term(iTRAQ4plex), M2(Oxidation)                                                   | 2143.05100 | 61 | 3.67 | Expt2 |
| LLESEAVNENLR                | 3  | 157823695;157823731;157823795;157823761                                            | N-Term(iTRAQ4plex)                                                                  | 1530.82573 | 61 | 3.75 | Expt2 |
| FTQSALDCMGVEVGR             | 1  | 118601017                                                                          | N-Term(iTRAQ4plex), C8(Methylthio)                                                  | 1802.84232 | 61 |      | Expt2 |
| LATELPDLFOTAK               | 3  | 160333863                                                                          | N-Term(iTRAQ4plex), K13(iTRAQ4plex)                                                 | 1734.99578 | 61 |      | Expt2 |

|                             |   |                                                                                                                                                                                                                                                                                                                      |                                                                       |            |    |      |       |
|-----------------------------|---|----------------------------------------------------------------------------------------------------------------------------------------------------------------------------------------------------------------------------------------------------------------------------------------------------------------------|-----------------------------------------------------------------------|------------|----|------|-------|
| GSQGQVTPGR                  | 1 | 145580629                                                                                                                                                                                                                                                                                                            | N-Term(iTRAQ4plex)                                                    | 1172.65166 | 61 |      | Expt2 |
| NEGVATYAAVLFRR              | 3 | 6671684                                                                                                                                                                                                                                                                                                              | N-Term(iTRAQ4plex)                                                    | 1625.88022 | 61 | 3.96 | Expt2 |
| NTTPTGAAPPAGMTSTR           | 2 | 148747189                                                                                                                                                                                                                                                                                                            | N-Term(iTRAQ4plex)                                                    | 1774.88664 | 61 | 3.87 | Expt2 |
| IDCFSEVPTSVFGEK             | 1 | 126090932                                                                                                                                                                                                                                                                                                            | N-Term(iTRAQ4plex), C3(Methylthio), K15(iTRAQ4plex)                   | 1991.97295 | 61 |      | Expt2 |
| MQQNIQELEELEEEESAR          | 2 | 114326446                                                                                                                                                                                                                                                                                                            | N-Term(iTRAQ4plex), M1(Oxidation)                                     | 2493.15982 | 61 | 4.31 | Expt2 |
| DVLLQVEDER                  | 2 | 114326446                                                                                                                                                                                                                                                                                                            | N-Term(iTRAQ4plex)                                                    | 1359.72734 | 61 |      | Expt2 |
| QLPIYTEAIVEMYR              | 4 | 29336026                                                                                                                                                                                                                                                                                                             | N-Term(iTRAQ4plex), M12(Oxidation)                                    | 1885.98638 | 61 | 4.07 | Expt2 |
| DTDAAVGDNIGYITVLFPR         | 2 | 112363072                                                                                                                                                                                                                                                                                                            | N-Term(iTRAQ4plex)                                                    | 2328.20853 | 61 | 3.79 | Expt2 |
| CPTVDIDTPDVNIEVPEGK         | 2 | 61743961                                                                                                                                                                                                                                                                                                             | N-Term(iTRAQ4plex), C1(Methylthio), K19(iTRAQ4plex)                   | 2375.17600 | 61 | 3.99 | Expt2 |
| CWELLTGEEIAR                | 1 | 162138894                                                                                                                                                                                                                                                                                                            | N-Term(iTRAQ4plex), C1(Methylthio)                                    | 1726.79057 | 61 |      | Expt2 |
| AVPVSNIAPAAVGR              | 3 | 88758582;88758584                                                                                                                                                                                                                                                                                                    | N-Term(iTRAQ4plex)                                                    | 1465.86003 | 60 | 3.85 | Expt2 |
| TPDLSVOLPSADLDLK            | 2 | 149263538                                                                                                                                                                                                                                                                                                            | N-Term(iTRAQ4plex), K16(iTRAQ4plex)                                   | 2000.12729 | 60 | 3.60 | Expt2 |
| ALYEAELSQMOTHISDTSVLSMDNNR  | 6 | 54607171                                                                                                                                                                                                                                                                                                             | N-Term(iTRAQ4plex), M23(Oxidation)                                    | 3212.53745 | 60 | 5.10 | Expt2 |
| YDMAACMK                    | 1 | 149269348;6756041                                                                                                                                                                                                                                                                                                    | N-Term(iTRAQ4plex), C7(Methylthio), K9(iTRAQ4plex)                    | 1381.58940 | 60 |      | Expt2 |
| EAMCPGVSGEDSLLLATQVEGQTTNLR | 2 | 28395018                                                                                                                                                                                                                                                                                                             | N-Term(iTRAQ4plex), C4(Methylthio)                                    | 3224.52793 | 60 | 4.27 | Expt2 |
| TICITIK                     | 1 | 118197277                                                                                                                                                                                                                                                                                                            | N-Term(iTRAQ4plex), C3(Methylthio), K8(iTRAQ4plex)                    | 1254.70012 | 60 |      | Expt2 |
| GLPWOSSDDIAR                | 1 | 165972311                                                                                                                                                                                                                                                                                                            | N-Term(iTRAQ4plex)                                                    | 1616.81487 | 60 |      | Expt2 |
| LEPTVPEDEGR                 | 2 | 149253040;183979966                                                                                                                                                                                                                                                                                                  | N-Term(iTRAQ4plex)                                                    | 1343.69365 | 60 |      | Expt2 |
| YIDQEELNK                   | 2 | 40556608;6754254                                                                                                                                                                                                                                                                                                     | N-Term(iTRAQ4plex), K9(iTRAQ4plex)                                    | 1439.76409 | 60 | 3.91 | Expt2 |
| LQPFATEADVEEALR             | 1 | 112293273                                                                                                                                                                                                                                                                                                            | N-Term(iTRAQ4plex)                                                    | 1832.95696 | 60 |      | Expt2 |
| FDSVGYPTIK                  | 2 | 86198316                                                                                                                                                                                                                                                                                                             | N-Term(iTRAQ4plex), K10(iTRAQ4plex)                                   | 1414.78935 | 60 |      | Expt2 |
| AEIHNDLFEQLER               | 2 | 37537522                                                                                                                                                                                                                                                                                                             | N-Term(iTRAQ4plex)                                                    | 1861.97942 | 60 | 4.40 | Expt2 |
| GSLVPPPGALGSGALGAPAGVGR     | 5 | 31542089                                                                                                                                                                                                                                                                                                             | N-Term(iTRAQ4plex)                                                    | 2199.24405 | 60 | 4.01 | Expt2 |
| DFGWDFCFOPDGYEQTYAEMPK      | 3 | 31982664                                                                                                                                                                                                                                                                                                             | N-Term(iTRAQ4plex), C7(Methylthio), K22(iTRAQ4plex)                   | 2958.27335 | 60 | 4.35 | Expt2 |
| DASDDLDDLNFFNQK             | 1 | 149258752;14149756                                                                                                                                                                                                                                                                                                   | N-Term(iTRAQ4plex), K15(iTRAQ4plex)                                   | 2044.97330 | 60 |      | Expt2 |
| LCPNSTGAER                  | 2 | 33859604                                                                                                                                                                                                                                                                                                             | N-Term(iTRAQ4plex), C2(Methylthio)                                    | 1350.66277 | 60 | 3.54 | Expt2 |
| TTFGMIYDSLDAK               | 1 | 46519156;46519160;149267855;149271781                                                                                                                                                                                                                                                                                | N-Term(iTRAQ4plex), M6(Oxidation), K15(iTRAQ4plex)                    | 1985.97661 | 60 |      | Expt2 |
| AQFEGIVTDLIK                | 2 | 162461907                                                                                                                                                                                                                                                                                                            | N-Term(iTRAQ4plex), K12(iTRAQ4plex)                                   | 1621.93906 | 60 |      | Expt2 |
| ELLEQVAEFK                  | 2 | 82998566;15277319                                                                                                                                                                                                                                                                                                    | N-Term(iTRAQ4plex), K11(iTRAQ4plex)                                   | 1622.89665 | 60 | 3.55 | Expt2 |
| MPPYDEETQAIIDAAQEAR         | 1 | 6679465                                                                                                                                                                                                                                                                                                              | N-Term(iTRAQ4plex)                                                    | 2292.09892 | 60 |      | Expt2 |
| FYPDPQSQLEDITR              | 2 | 157041260                                                                                                                                                                                                                                                                                                            | N-Term(iTRAQ4plex)                                                    | 1922.96294 | 60 |      | Expt2 |
| IVLLGESAVGK                 | 2 | 28916687;149249575;113866024;13385374                                                                                                                                                                                                                                                                                | N-Term(iTRAQ4plex), K11(iTRAQ4plex)                                   | 1373.86846 | 60 |      | Expt2 |
| LPQLEALLPPR                 | 1 | 11496255                                                                                                                                                                                                                                                                                                             | N-Term(iTRAQ4plex)                                                    | 1390.85466 | 60 |      | Expt2 |
| AFVEVNEEGTEAAAATAGMMTVR     | 2 | 6678097;255759941                                                                                                                                                                                                                                                                                                    | N-Term(iTRAQ4plex)                                                    | 2499.20322 | 60 | 4.09 | Expt2 |
| WGEGAEYVVESTGVFTMEK         | 6 | 149248895;149249272;149251040;149251044;149251140;149251223;149251463;149251509;149251903;149251905;149251911;149251964;149251966;149257623;149258770;149258772;149258934;149258938;149259154;149259607;149260709;149263021;149265154;149265502;149265922;149266427;149266431;149268472;149268967;82996390;149273204 | N-Term(iTRAQ4plex), M19(Oxidation), K21(iTRAQ4plex)                   | 2595.26401 | 60 | 4.34 | Expt2 |
| CGTGIVGVFK                  | 1 | 158635992                                                                                                                                                                                                                                                                                                            | N-Term(iTRAQ4plex), C1(Methylthio), K11(iTRAQ4plex)                   | 1413.78398 | 59 |      | Expt2 |
| EVOLAQIFELSR                | 2 | 124486765                                                                                                                                                                                                                                                                                                            | N-Term(iTRAQ4plex)                                                    | 1673.93279 | 59 | 3.70 | Expt2 |
| ALWEDSGIONAYDR              | 1 | 89001109                                                                                                                                                                                                                                                                                                             | N-Term(iTRAQ4plex)                                                    | 1781.86357 | 59 |      | Expt2 |
| LLESLDQLELR                 | 3 | 21703784                                                                                                                                                                                                                                                                                                             | N-Term(iTRAQ4plex)                                                    | 1472.85076 | 59 | 3.84 | Expt2 |
| GFVVPAPICTDK                | 2 | 171460960                                                                                                                                                                                                                                                                                                            | N-Term(iTRAQ4plex), C9(Methylthio), K12(iTRAQ4plex)                   | 1580.84709 | 59 |      | Expt2 |
| ATDAEADVASLNR               | 1 | 31560030;11875203                                                                                                                                                                                                                                                                                                    | N-Term(iTRAQ4plex)                                                    | 1476.73857 | 59 |      | Expt2 |
| LGOYSFPNPEWLDVSEDAK         | 2 | 31542089                                                                                                                                                                                                                                                                                                             | N-Term(iTRAQ4plex), K19(iTRAQ4plex)                                   | 2483.24173 | 59 | 3.41 | Expt2 |
| IIEEAPAGINPEVR              | 2 | 94410500;186700620                                                                                                                                                                                                                                                                                                   | N-Term(iTRAQ4plex)                                                    | 1748.96819 | 59 |      | Expt2 |
| AVSFFSGSCVPCADPVAFPK        | 4 | 20330802                                                                                                                                                                                                                                                                                                             | N-Term(iTRAQ4plex), C10(Methylthio), C13(Methylthio), K21(iTRAQ4plex) | 2496.16825 | 59 | 6.96 | Expt2 |
| TMQNTNDVETAR                | 1 | 6671684                                                                                                                                                                                                                                                                                                              | N-Term(iTRAQ4plex)                                                    | 1523.72649 | 59 |      | Expt2 |
| SISFIPPDGEFELMR             | 1 | 6753074                                                                                                                                                                                                                                                                                                              | N-Term(iTRAQ4plex)                                                    | 1881.95403 | 59 |      | Expt2 |
| TGGTYGEDLIGADYNLSQVCDGK     | 2 | 93102409                                                                                                                                                                                                                                                                                                             | N-Term(iTRAQ4plex), C19(Methylthio), K22(iTRAQ4plex)                  | 2597.17948 | 59 | 4.26 | Expt2 |
| VISFEEQVASIR                | 2 | 6753490                                                                                                                                                                                                                                                                                                              | N-Term(iTRAQ4plex)                                                    | 1521.84087 | 59 | 4.48 | Expt2 |



|                           |    |                                                                                                                                                                                                                                                                                                                                                                                                                                                       |                                                                                      |            |    |      |       |
|---------------------------|----|-------------------------------------------------------------------------------------------------------------------------------------------------------------------------------------------------------------------------------------------------------------------------------------------------------------------------------------------------------------------------------------------------------------------------------------------------------|--------------------------------------------------------------------------------------|------------|----|------|-------|
| QDIAVISDSYFPR             | 2  | 153791270                                                                                                                                                                                                                                                                                                                                                                                                                                             | N-Term(iTRAQ4plex)                                                                   | 1654.85735 | 59 | 3.66 | Expt2 |
| LILSTDLLEEFQEMNK          | 2  | 13385560                                                                                                                                                                                                                                                                                                                                                                                                                                              | N-Term(iTRAQ4plex), K16(iTRAQ4plex)                                                  | 2199.14774 | 59 | 3.58 | Expt2 |
| LVVENVDLWTQMR             | 4  | 28395023                                                                                                                                                                                                                                                                                                                                                                                                                                              | N-Term(iTRAQ4plex)                                                                   | 1659.92180 | 59 | 3.66 | Expt2 |
| GNSIIMLEALER              | 2  | 94401818                                                                                                                                                                                                                                                                                                                                                                                                                                              | N-Term(iTRAQ4plex), M6(Oxidation)                                                    | 1505.81523 | 59 |      | Expt2 |
| ADAVEATFOVELPR            | 1  | 226531047;226531069                                                                                                                                                                                                                                                                                                                                                                                                                                   | N-Term(iTRAQ4plex)                                                                   | 1817.95090 | 59 |      | Expt2 |
| LLDSLEPPGEPGPSTIPENDTVDGR | 5  | 9790261                                                                                                                                                                                                                                                                                                                                                                                                                                               | N-Term(iTRAQ4plex)                                                                   | 2836.40531 | 59 | 3.87 | Expt2 |
| VLNNMEIGTSLYDEEGAK        | 5  | 70778976                                                                                                                                                                                                                                                                                                                                                                                                                                              | N-Term(iTRAQ4plex), K18(iTRAQ4plex)                                                  | 2271.15232 | 59 | 4.30 | Expt2 |
| LEGLTDEINFLR              | 4  | 114145561                                                                                                                                                                                                                                                                                                                                                                                                                                             | N-Term(iTRAQ4plex)                                                                   | 1563.85930 | 58 | 3.71 | Expt2 |
| SGAQSSTPLSPTR             | 4  | 162287370;161760667                                                                                                                                                                                                                                                                                                                                                                                                                                   | N-Term(iTRAQ4plex)                                                                   | 1503.79289 | 58 | 3.52 | Expt2 |
| VMALSLVGADPEQLR           | 3  | 115647999                                                                                                                                                                                                                                                                                                                                                                                                                                             | N-Term(iTRAQ4plex)                                                                   | 1742.96079 | 58 | 3.91 | Expt2 |
| MGAGMGFGLER               | 3  | 21313308;158186704                                                                                                                                                                                                                                                                                                                                                                                                                                    | N-Term(iTRAQ4plex)                                                                   | 1269.61894 | 58 | 3.76 | Expt2 |
| TLYNNOPIDFLK              | 2  | 30519997                                                                                                                                                                                                                                                                                                                                                                                                                                              | N-Term(iTRAQ4plex), K12(iTRAQ4plex)                                                  | 1753.97685 | 58 |      | Expt2 |
| GSFVLLDGETFEVK            | 1  | 149251616;9507079                                                                                                                                                                                                                                                                                                                                                                                                                                     | N-Term(iTRAQ4plex), K14(iTRAQ4plex)                                                  | 1829.00005 | 58 |      | Expt2 |
| DNLTWTSMDMOGDGEEQNK       | 2  | 226874906                                                                                                                                                                                                                                                                                                                                                                                                                                             | N-Term(iTRAQ4plex), M10(Oxidation), K19(iTRAQ4plex)                                  | 2485.14054 | 58 | 3.44 | Expt2 |
| TGASFQQAQEEFSOGIFSSR      | 2  | 12331398                                                                                                                                                                                                                                                                                                                                                                                                                                              | N-Term(iTRAQ4plex)                                                                   | 2349.12578 | 58 | 3.70 | Expt2 |
| TVFFWAPIMK                | 3  | 21312594                                                                                                                                                                                                                                                                                                                                                                                                                                              | N-Term(iTRAQ4plex), K10(iTRAQ4plex)                                                  | 1527.86931 | 58 |      | Expt2 |
| QFVTPADVWVSGNPK           | 1  | 21704120;262050551;85986577                                                                                                                                                                                                                                                                                                                                                                                                                           | N-Term(iTRAQ4plex), K14(iTRAQ4plex)                                                  | 1746.96599 | 58 |      | Expt2 |
| ILAAATQFPTAAR             | 2  | 13507656                                                                                                                                                                                                                                                                                                                                                                                                                                              | N-Term(iTRAQ4plex)                                                                   | 1532.85320 | 58 | 4.23 | Expt2 |
| TFVQSASATMQQYAQR          | 5  | 194328702;194328706;18700026;194328708                                                                                                                                                                                                                                                                                                                                                                                                                | N-Term(iTRAQ4plex)                                                                   | 1960.97165 | 58 | 4.95 | Expt2 |
| EGLELPEDEEEK              | 6  | 40556608;6754254                                                                                                                                                                                                                                                                                                                                                                                                                                      | N-Term(iTRAQ4plex), K12(iTRAQ4plex)                                                  | 1704.84807 | 58 | 3.84 | Expt2 |
| FQGGGAGPVGGQGPR           | 2  | 149252953;23956214                                                                                                                                                                                                                                                                                                                                                                                                                                    | N-Term(iTRAQ4plex)                                                                   | 1485.77031 | 58 | 3.48 | Expt2 |
| VAGMDVELTVEER             | 1  | 226874906                                                                                                                                                                                                                                                                                                                                                                                                                                             | N-Term(iTRAQ4plex), M4(Oxidation)                                                    | 1607.81206 | 58 |      | Expt2 |
| DLYANTVLSGGFTMYPIADR      | 13 | 6671509;6752954                                                                                                                                                                                                                                                                                                                                                                                                                                       | N-Term(iTRAQ4plex), N5(Deamidated)                                                   | 2360.18222 | 58 | 0.97 | 7.38  |
| CFIVGADNVGSK              | 2  | 94369748;94383772;6671569                                                                                                                                                                                                                                                                                                                                                                                                                             | N-Term(iTRAQ4plex), C1(Methylthio), K12(iTRAQ4plex)                                  | 1543.78386 | 58 | 3.60 | Expt2 |
| WLSTSIPEAQWOSLAR          | 1  | 93102409                                                                                                                                                                                                                                                                                                                                                                                                                                              | N-Term(iTRAQ4plex)                                                                   | 2104.10300 | 58 |      | Expt2 |
| VVDLMAYMASKE              | 4  | 149248895;149249564;149249566;149251040;149251044;149251140;149251223;149251463;149251509;149251903;149251905;149251911;149251964;149251966;149252413;149253819;149253823;149257623;149258744;149258770;149258772;149258934;149258938;149259607;149259652;149259964;149260709;149260711;94387946;149260748;149263021;149265154;149265922;149266302;149266427;149266431;149268472;149268967;149270469;149270673;149272161;94408118;149273204;149275059 | N-Term(iTRAQ4plex), K11(iTRAQ4plex)                                                  | 1644.87004 | 58 | 4.07 | Expt2 |
| ALMGLYNGQVLCK             | 1  | 33859811                                                                                                                                                                                                                                                                                                                                                                                                                                              | N-Term(iTRAQ4plex), N7(Deamidated), C12(Methylthio), K13(iTRAQ4plex)                 | 1744.90776 | 58 |      | Expt2 |
| NVFLSPMSISSALMVMFGAK      | 1  | 6678097                                                                                                                                                                                                                                                                                                                                                                                                                                               | N-Term(iTRAQ4plex), M7(Oxidation), M15(Oxidation), M18(Oxidation), K21(iTRAQ4plex)   | 2537.31534 | 58 |      | Expt2 |
| ADVEIPFEEVLEK             | 1  | 6755997                                                                                                                                                                                                                                                                                                                                                                                                                                               | N-Term(iTRAQ4plex), K13(iTRAQ4plex)                                                  | 1805.98540 | 58 |      | Expt2 |
| LICCDILDVLCK              | 1  | 226874906                                                                                                                                                                                                                                                                                                                                                                                                                                             | N-Term(iTRAQ4plex), C3(Methylthio), C4(Methylthio), K12(iTRAQ4plex)                  | 1742.88188 | 58 |      | Expt2 |
| ETPGSQPSEPCSGVSR          | 1  | 148747189                                                                                                                                                                                                                                                                                                                                                                                                                                             | N-Term(iTRAQ4plex), C11(Methylthio)                                                  | 1807.80742 | 58 |      | Expt2 |
| VMAGALEGDFIGPK            | 2  | 8392847;22122615                                                                                                                                                                                                                                                                                                                                                                                                                                      | N-Term(iTRAQ4plex), K15(iTRAQ4plex)                                                  | 1806.01189 | 58 |      | Expt2 |
| STGGAPTFNVTVMTAK          | 6  | 6755040                                                                                                                                                                                                                                                                                                                                                                                                                                               | N-Term(iTRAQ4plex), K17(iTRAQ4plex)                                                  | 1971.04502 | 58 | 4.06 | Expt2 |
| LOSEIEMAATETR             | 2  | 112421039                                                                                                                                                                                                                                                                                                                                                                                                                                             | N-Term(iTRAQ4plex), M7(Oxidation)                                                    | 1638.81816 | 58 |      | Expt2 |
| VAIGGOSDEGER              | 2  | 82997826;38084778;94405733;83019564;34328288                                                                                                                                                                                                                                                                                                                                                                                                          | N-Term(iTRAQ4plex)                                                                   | 1361.68083 | 58 | 3.47 | Expt2 |
| VIQGFEEALALEGPVPEGSGALOER | 4  | 111185907                                                                                                                                                                                                                                                                                                                                                                                                                                             | N-Term(iTRAQ4plex)                                                                   | 2682.42734 | 58 | 6.22 | Expt2 |
| DFLLGAYQTEFPEGPTQLMK      | 2  | 31982393                                                                                                                                                                                                                                                                                                                                                                                                                                              | N-Term(iTRAQ4plex), M20(Oxidation), K21(iTRAQ4plex)                                  | 2718.35739 | 58 | 4.75 | Expt2 |
| NADMSEEMQDSVECATQALEK     | 2  | 213688406                                                                                                                                                                                                                                                                                                                                                                                                                                             | N-Term(iTRAQ4plex), M4(Oxidation), C15(Methylthio), K22(iTRAQ4plex)                  | 2807.21225 | 58 | 4.47 | Expt2 |
| NADMSEEMQNSVECATQALEK     | 3  | 82998589                                                                                                                                                                                                                                                                                                                                                                                                                                              | N-Term(iTRAQ4plex), M4(Oxidation), N11(Deamidated), C15(Methylthio), K22(iTRAQ4plex) | 2807.21225 | 58 | 4.47 | Expt2 |
| GMSADPPEYDLADLSSLPEIDK    | 2  | 6679421                                                                                                                                                                                                                                                                                                                                                                                                                                               | N-Term(iTRAQ4plex), K22(iTRAQ4plex)                                                  | 2683.29106 | 58 | 4.65 | Expt2 |
| VSETVAFITDVSILR           | 3  | 82617575                                                                                                                                                                                                                                                                                                                                                                                                                                              | N-Term(iTRAQ4plex)                                                                   | 1794.97354 | 58 | 3.51 | Expt2 |
| TSIAIDTIHQK               | 4  | 6680748                                                                                                                                                                                                                                                                                                                                                                                                                                               | N-Term(iTRAQ4plex), K12(iTRAQ4plex)                                                  | 1604.95671 | 58 | 1.03 | 3.97  |

|                                   |    |                             |                                                                       |            |    |      |       |       |
|-----------------------------------|----|-----------------------------|-----------------------------------------------------------------------|------------|----|------|-------|-------|
| EQMEEVVAR                         | 4  | 29336026                    | N-Term(iTRAQ4plex)                                                    | 1363.66570 | 58 | 3.53 | Expt2 |       |
| EQAADTEAAQEVTLQLLVER              | 2  | 6671565                     | N-Term(iTRAQ4plex)                                                    | 2245.14896 | 58 | 4.87 | Expt2 |       |
| AFTGIEDPVTR                       | 3  | 111185907                   | N-Term(iTRAQ4plex)                                                    | 1349.71916 | 58 | 3.59 | Expt2 |       |
| GTSLSSEEAAPSLPEK                  | 5  | 161484644                   | N-Term(iTRAQ4plex), K16(iTRAQ4plex)                                   | 1901.00908 | 58 | 4.07 | Expt2 |       |
| SLMPYFLLTOAVR                     | 1  | 19705424                    | N-Term(iTRAQ4plex)                                                    | 1682.94426 | 57 |      | Expt2 |       |
| CDSGFALDSEER                      | 2  | 118197277                   | N-Term(iTRAQ4plex), C1(Methylthio)                                    | 1518.63396 | 57 |      | Expt2 |       |
| NIIIFYGSQTGTAEFANR                | 1  | 6679421                     | N-Term(iTRAQ4plex)                                                    | 2261.13791 | 57 |      | Expt2 |       |
| IYEFPTDDEEENK                     | 3  | 28173550                    | N-Term(iTRAQ4plex), K14(iTRAQ4plex)                                   | 2045.94597 | 57 |      | Expt2 |       |
| VSSEDPGPTPQTR                     | 2  | 124486588                   | N-Term(iTRAQ4plex)                                                    | 1514.75981 | 57 | 3.43 | Expt2 |       |
| SDQVNGVLVLSLDDK                   | 2  | 6679567                     | N-Term(iTRAQ4plex), N5(Deamidated), K15(iTRAQ4plex)                   | 1889.09085 | 57 | 3.85 | Expt2 |       |
| EQEIAAVQAR                        | 1  | 124486712                   | N-Term(iTRAQ4plex)                                                    | 1258.68718 | 57 |      | Expt2 |       |
| DOSTTWTWPGGGR                     | 1  | 156938252                   | N-Term(iTRAQ4plex)                                                    | 1491.71111 | 57 |      | Expt2 |       |
| DIEGVVQEGVPTSQSYSEAR              | 4  | 145699091                   | N-Term(iTRAQ4plex)                                                    | 2295.12705 | 57 | 4.08 | Expt2 |       |
| EILQSYVECEIK                      | 1  | 6680139:46909579            | N-Term(iTRAQ4plex), C9(Methylthio), K12(iTRAQ4plex)                   | 1787.92197 | 57 |      | Expt2 |       |
| LLSDLCGTVMSTNDVEK                 | 2  | 110625656:270309161         | N-Term(iTRAQ4plex), C6(Methylthio), M10(Oxidation), K17(iTRAQ4plex)   | 2175.06241 | 57 | 3.50 | Expt2 |       |
| TATEEWGTEWDNEDLSEK                | 1  | 33239421                    | N-Term(iTRAQ4plex), K19(iTRAQ4plex)                                   | 2529.15708 | 57 |      | Expt2 |       |
| AVTIATPATAAPAASAAITTSAAQEPPAAPEPR | 3  | 194440682:194440687         | N-Term(iTRAQ4plex)                                                    | 3334.73623 | 57 | 3.87 | Expt2 |       |
| VQTDPPSPVICDLYPNGVFPK             | 2  | 9789873                     | N-Term(iTRAQ4plex), C11(Methylthio), N16(Deamidated), K21(iTRAQ4plex) | 2621.33310 | 57 |      | Expt2 |       |
| QQGSPPPGVQLDVAPQSLNPEVLLK         | 2  | 23943828                    | N-Term(iTRAQ4plex), K25(iTRAQ4plex)                                   | 2899.62734 | 57 |      | Expt2 |       |
| ITVIAIYEDGDGGLHTGNGR              | 2  | 111074529                   | N-Term(iTRAQ4plex), N18(Deamidated)                                   | 2203.11911 | 57 | 4.31 | Expt2 |       |
| GAQGVILVYDVTR                     | 9  | 30841008                    | N-Term(iTRAQ4plex)                                                    | 1534.87351 | 57 | 4.51 | Expt2 |       |
| ISMPDFDLNLK                       | 1  | 61743961                    | N-Term(iTRAQ4plex), M3(Oxidation), K11(iTRAQ4plex)                    | 1596.86516 | 57 |      | Expt2 |       |
| DLLFOALGR                         | 1  | 31981400                    | N-Term(iTRAQ4plex)                                                    | 1176.68669 | 57 |      | Expt2 |       |
| GMAAAGNYAWVNR                     | 2  | 21703842                    | N-Term(iTRAQ4plex)                                                    | 1524.74712 | 57 | 4.15 | Expt2 |       |
| SVSIGYLLVK                        | 2  | 226437587                   | N-Term(iTRAQ4plex), K10(iTRAQ4plex)                                   | 1366.85625 | 57 | 3.43 | Expt2 |       |
| DGHLFLGQVPLVEIDGMLLTQTR           | 4  | 160298217                   | N-Term(iTRAQ4plex), M17(Oxidation), M18(Oxidation)                    | 2746.41281 | 57 | 5.08 | Expt2 |       |
| NOVAMNPNQNTVFDK                   | 2  | 124339838                   | N-Term(iTRAQ4plex), Q8(Deamidated), K15(iTRAQ4plex)                   | 1966.01592 | 57 |      | Expt2 |       |
| AVGPSSTQLYMMR                     | 2  | 164698474:84370256          | N-Term(iTRAQ4plex)                                                    | 1552.82854 | 56 | 4.47 | Expt2 |       |
| LNTIPLFVQLLYSSVENIQR              | 2  | 28395018                    | N-Term(iTRAQ4plex)                                                    | 2491.41721 | 56 | 3.82 | Expt2 |       |
| LTPVGLSENVYK                      | 2  | 110735428:110735426         | N-Term(iTRAQ4plex), K13(iTRAQ4plex)                                   | 1704.97776 | 56 | 4.03 | Expt2 |       |
| DATSLNQAAALYR                     | 2  | 31982273                    | N-Term(iTRAQ4plex)                                                    | 1466.77385 | 56 | 4.09 | Expt2 |       |
| DAGLSPEQPALALAGVAASPR             | 2  | 81295421:81295418:209862955 | N-Term(iTRAQ4plex)                                                    | 2135.16465 | 56 | 4.69 | Expt2 |       |
| LYQEVEIASVDAFOGR                  | 2  | 170784813:170784811         | N-Term(iTRAQ4plex)                                                    | 1969.01804 | 56 | 4.39 | Expt2 |       |
| YSNAQLLQIDNAR                     | 66 | 149262636:118130981         | N-Term(iTRAQ4plex), N3(Deamidated), N12(Deamidated)                   | 1700.93413 | 56 | 1.41 | 6.46  | Expt2 |
| YSPPPGVSVSNAPNLTAENLEVVR          | 4  | 31542421                    | N-Term(iTRAQ4plex)                                                    | 2830.44266 | 56 | 3.81 | Expt2 |       |
| AVNSATGVPTV                       | 5  | 31560656                    | N-Term(iTRAQ4plex)                                                    | 1159.64446 | 56 |      | Expt2 |       |
| VLLNDGGYYDPETGVFTAPLAGR           | 1  | 19527130                    | N-Term(iTRAQ4plex)                                                    | 2569.31119 | 56 |      | Expt2 |       |
| LTLGEVGLLEASDTGSGPR               | 2  | 226423935                   | N-Term(iTRAQ4plex)                                                    | 2032.03545 | 56 | 3.48 | Expt2 |       |
| ESSIENEIAVLR                      | 3  | 79750129                    | N-Term(iTRAQ4plex)                                                    | 1503.81450 | 56 | 3.80 | Expt2 |       |
| DEAVFDDEVADPAAAENCLAER            | 2  | 163965368                   | N-Term(iTRAQ4plex), C18(Methylthio)                                   | 2540.11136 | 56 |      | Expt2 |       |
| LTEAVTVDYLNNSGNANDAVSGVR          | 1  | 110630015:34486094          | N-Term(iTRAQ4plex)                                                    | 2509.27365 | 56 |      | Expt2 |       |
| SVGMIAGGTGITPMLQVIR               | 2  | 19745150                    | N-Term(iTRAQ4plex), M4(Oxidation), M14(Oxidation)                     | 2077.13358 | 56 | 4.55 | Expt2 |       |
| EIVSDVTDGNEQLSVVR                 | 1  | 21450111                    | N-Term(iTRAQ4plex)                                                    | 2004.03972 | 56 |      | Expt2 |       |
| SGELAVQALDQFATVVEAK               | 2  | 23956084                    | N-Term(iTRAQ4plex), K19(iTRAQ4plex)                                   | 2264.24137 | 56 | 4.18 | Expt2 |       |
| VSIEVAAPER                        | 2  | 158937304                   | N-Term(iTRAQ4plex)                                                    | 1214.69097 | 56 |      | Expt2 |       |
| IAICGAISSQYNR                     | 4  | 13385466                    | N-Term(iTRAQ4plex), C4(Methylthio)                                    | 1498.76603 | 56 | 3.59 | Expt2 |       |
| LAGPQLVQMFIDGDAK                  | 5  | 228008337                   | N-Term(iTRAQ4plex), K16(iTRAQ4plex)                                   | 1933.08843 | 56 | 4.50 | Expt2 |       |
| ITDGTMLQAVR                       | 2  | 8567340                     | N-Term(iTRAQ4plex)                                                    | 1477.78057 | 56 | 3.68 | Expt2 |       |
| NPFDTFFGQR                        | 1  | 9055242                     | N-Term(iTRAQ4plex)                                                    | 1372.67876 | 55 |      | Expt2 |       |
| FVAEDLSQDCFWTK                    | 1  | 6681183                     | N-Term(iTRAQ4plex), C10(Methylthio), K14(iTRAQ4plex)                  | 2022.95725 | 55 |      | Expt2 |       |
| TVNLLNLDWTAGGEEYDR                | 2  | 9625037                     | N-Term(iTRAQ4plex)                                                    | 2168.03813 | 55 | 3.82 | Expt2 |       |
| SIPLDEGEDEAQR                     | 2  | 134288917                   | N-Term(iTRAQ4plex)                                                    | 1602.77178 | 55 |      | Expt2 |       |
| NTSEQDQPMGGWEMIR                  | 2  | 188219589                   | N-Term(iTRAQ4plex), M9(Oxidation)                                     | 2038.90764 | 55 |      | Expt2 |       |
| MLSDFLDDVR                        | 1  | 9910550                     | N-Term(iTRAQ4plex), M1(Oxidation)                                     | 1483.76482 | 55 |      | Expt2 |       |
| AGTQLLAGLR                        | 2  | 154240716                   | N-Term(iTRAQ4plex)                                                    | 1143.69853 | 55 | 3.95 | Expt2 |       |

|                              |   |                                                                                                                                                                        |                                                      |            |    |      |       |
|------------------------------|---|------------------------------------------------------------------------------------------------------------------------------------------------------------------------|------------------------------------------------------|------------|----|------|-------|
| FPFLFNGR                     | 3 | 6678902                                                                                                                                                                | N-Term(iTRAQ4plex), N6(Deamidated)                   | 1142.61211 | 55 |      | Expt2 |
| NGNGGPGPYVGOAGTATLPR         | 6 | 146219835;146219830;146219849;146231979                                                                                                                                | N-Term(iTRAQ4plex), N1(Deamidated), N3(Deamidated)   | 2030.01413 | 55 | 4.90 | Expt2 |
| ASNSPEQSSCLEGLDSEVPGPTEDLK   | 2 | 162417949                                                                                                                                                              | N-Term(iTRAQ4plex), C10(Methylthio), K26(iTRAQ4plex) | 3023.40854 | 55 | 4.12 | Expt2 |
| GAETTLALPMASDLELYDVTENSMR    | 4 | 226423922                                                                                                                                                              | N-Term(iTRAQ4plex), M10(Oxidation), M24(Oxidation)   | 2903.38602 | 55 | 3.71 | Expt2 |
| GLTMLDHEQVSPDPGAQFLIOTGSVGR  | 2 | 9790247                                                                                                                                                                | N-Term(iTRAQ4plex)                                   | 3126.56284 | 55 | 3.67 | Expt2 |
| TPGGAQSALR                   | 6 | 31981100;63680339;149267017                                                                                                                                            | N-Term(iTRAQ4plex)                                   | 1198.66875 | 55 |      | Expt2 |
| EOGLFSFWR                    | 7 | 148747424                                                                                                                                                              | N-Term(iTRAQ4plex)                                   | 1313.68010 | 55 | 3.59 | Expt2 |
| TVGYVTAPEDTR                 | 1 | 8393988                                                                                                                                                                | N-Term(iTRAQ4plex)                                   | 1553.79326 | 55 |      | Expt2 |
| VQNTSLEAIVONASSDNGIQLSAVOAAR | 1 | 6680598                                                                                                                                                                | N-Term(iTRAQ4plex)                                   | 3156.64304 | 55 |      | Expt2 |
| NGVOAMVEFDSVQSAQR            | 3 | 183980004                                                                                                                                                              | N-Term(iTRAQ4plex), N1(Deamidated), M6(Oxidation)    | 2026.96671 | 55 | 3.71 | Expt2 |
| NALLQLTDSQIADVAR             | 1 | 40018610                                                                                                                                                               | N-Term(iTRAQ4plex)                                   | 1872.03604 | 55 |      | Expt2 |
| VEPGLGADNSVWR                | 4 | 125347376                                                                                                                                                              | N-Term(iTRAQ4plex)                                   | 1456.78642 | 55 | 3.55 | Expt2 |
| TMGVMFTPLTVK                 | 1 | 225637531                                                                                                                                                              | N-Term(iTRAQ4plex), K12(iTRAQ4plex)                  | 1612.91460 | 55 |      | Expt2 |
| LTAELIEQAAQYTNVAVR           | 4 | 228480232;149257356                                                                                                                                                    | N-Term(iTRAQ4plex)                                   | 2035.10337 | 55 | 4.29 | Expt2 |
| LLOAFII                      | 7 | 6680554                                                                                                                                                                | N-Term(iTRAQ4plex)                                   | 961.62285  | 55 |      | Expt2 |
| SQECYDFPELYR                 | 3 | 153791270                                                                                                                                                              | N-Term(iTRAQ4plex), C4(Methylthio)                   | 1739.75469 | 55 | 3.61 | Expt2 |
| MTVNESEQLVSCSMDDTVR          | 6 | 6755995                                                                                                                                                                | N-Term(iTRAQ4plex), M1(Oxidation), C12(Methylthio)   | 2350.02188 | 55 | 3.96 | Expt2 |
| IOFNESFAEMNVR                | 1 | 6753498                                                                                                                                                                | N-Term(iTRAQ4plex)                                   | 1629.78887 | 55 |      | Expt2 |
| SENGLEFTSSGSANTETTK          | 2 | 6755963                                                                                                                                                                | N-Term(iTRAQ4plex), N3(Deamidated), K19(iTRAQ4plex)  | 2249.07547 | 55 | 3.81 | Expt2 |
| MIENGLSFLPTLR                | 2 | 20137008                                                                                                                                                               | N-Term(iTRAQ4plex), N4(Deamidated)                   | 1722.92449 | 55 |      | Expt2 |
| ODIITALDNVEAR                | 1 | 27370032                                                                                                                                                               | N-Term(iTRAQ4plex)                                   | 1714.94950 | 55 |      | Expt2 |
| VIESTODLGNDLAGVMALQR         | 1 | 117938332;117938334                                                                                                                                                    | N-Term(iTRAQ4plex)                                   | 2274.19536 | 55 |      | Expt2 |
| STTSAPEDFISNR                | 1 | 87196490                                                                                                                                                               | N-Term(iTRAQ4plex)                                   | 1550.74663 | 55 |      | Expt2 |
| IVFLEESSQOEK                 | 1 | 6753960                                                                                                                                                                | N-Term(iTRAQ4plex), K12(iTRAQ4plex)                  | 1724.93889 | 55 |      | Expt2 |
| DVSVTVGLDSLR                 | 1 | 124249090                                                                                                                                                              | N-Term(iTRAQ4plex)                                   | 1291.70329 | 55 |      | Expt2 |
| FASFIDK                      | 7 | 29789317;47059013;124487419;51092301;85701680;20911031;22164776;51092295;133778953;14861854;54607171;113195684;51092293;114145561;9910294;126116585;47523977;225903444 | N-Term(iTRAQ4plex), K7(iTRAQ4plex)                   | 1115.64556 | 54 |      | Expt2 |
| ETQSLESER                    | 1 | 82950147;82950149;149264086                                                                                                                                            | N-Term(iTRAQ4plex)                                   | 1350.66557 | 54 |      | Expt2 |
| NLPYSEIEIVMYK                | 2 | 114326446                                                                                                                                                              | N-Term(iTRAQ4plex), M12(Oxidation), K14(iTRAQ4plex)  | 2032.05869 | 54 | 3.52 | Expt2 |
| MEEADALIESLCR                | 1 | 74315975                                                                                                                                                               | N-Term(iTRAQ4plex), M1(Oxidation), C12(Methylthio)   | 1685.77410 | 54 |      | Expt2 |
| VGGLOGSDSLNIQNQOTSGGSLQSQK   | 1 | 119226255                                                                                                                                                              | N-Term(iTRAQ4plex), K28(iTRAQ4plex)                  | 3104.57993 | 54 |      | Expt2 |
| DONTVELQR                    | 3 | 117938332;117938334                                                                                                                                                    | N-Term(iTRAQ4plex)                                   | 1347.70317 | 54 | 3.46 | Expt2 |
| DFMIQGGDPTGTR                | 1 | 149269121                                                                                                                                                              | N-Term(iTRAQ4plex)                                   | 1595.76116 | 54 |      | Expt2 |
| NVIIGPA                      | 5 | 6678329                                                                                                                                                                | N-Term(iTRAQ4plex)                                   | 827.51250  | 54 |      | Expt2 |
| AGVMALANLQIQR                | 3 | 13386026                                                                                                                                                               | N-Term(iTRAQ4plex)                                   | 1641.96440 | 54 | 0.98 | Expt2 |
| SSLDSIEMAYAR                 | 2 | 27369533                                                                                                                                                               | N-Term(iTRAQ4plex)                                   | 1486.72869 | 54 | 3.59 | Expt2 |
| GAAAMIPGPQTVATEIR            | 5 | 7305029;54873604                                                                                                                                                       | N-Term(iTRAQ4plex), M5(Oxidation)                    | 1842.98589 | 54 | 3.90 | Expt2 |
| EVVDPEVFFNATGCLR             | 4 | 9790161                                                                                                                                                                | N-Term(iTRAQ4plex), C14(Methylthio)                  | 1985.96244 | 54 | 3.69 | Expt2 |
| VLAQNSGFDLOETLVK             | 1 | 6753324                                                                                                                                                                | N-Term(iTRAQ4plex), K16(iTRAQ4plex)                  | 2050.15207 | 54 |      | Expt2 |
| NSNILEDELETLR                | 2 | 148747410                                                                                                                                                              | N-Term(iTRAQ4plex)                                   | 1560.84123 | 54 | 4.02 | Expt2 |
| GIVNEOFLQR                   | 3 | 23956084                                                                                                                                                               | N-Term(iTRAQ4plex)                                   | 1460.83452 | 54 | 3.92 | Expt2 |
| ELDDISQIEIAQLQR              | 3 | 170784836;170784834                                                                                                                                                    | N-Term(iTRAQ4plex)                                   | 1801.93723 | 54 | 0.97 | Expt2 |
| VQVALEELQDLK                 | 1 | 134288917                                                                                                                                                              | N-Term(iTRAQ4plex), K12(iTRAQ4plex)                  | 1672.97403 | 54 |      | Expt2 |
| CAVVDVPPGGAK                 | 1 | 6680027                                                                                                                                                                | N-Term(iTRAQ4plex), C1(Methylthio), K12(iTRAQ4plex)  | 1496.79013 | 54 |      | Expt2 |
| LVSALGPTSLK                  | 2 | 110735428;110735426                                                                                                                                                    | N-Term(iTRAQ4plex), K12(iTRAQ4plex)                  | 1520.93889 | 54 | 3.68 | Expt2 |
| LQIEEDAAR                    | 5 | 111185907                                                                                                                                                              | N-Term(iTRAQ4plex)                                   | 1188.63677 | 54 | 3.40 | Expt2 |
| AOEQLATALONLEEAEK            | 5 | 47894398                                                                                                                                                               | N-Term(iTRAQ4plex), K17(iTRAQ4plex)                  | 2174.16245 | 54 | 4.99 | Expt2 |
| SVYSWDIVVQR                  | 1 | 125628629                                                                                                                                                              | N-Term(iTRAQ4plex)                                   | 1495.80742 | 54 |      | Expt2 |
| ATAGSYISLRR                  | 2 | 158303322                                                                                                                                                              | N-Term(iTRAQ4plex)                                   | 1269.69170 | 54 | 3.42 | Expt2 |
| CITIEDVNDNLPTFTR             | 1 | 7305007                                                                                                                                                                | N-Term(iTRAQ4plex), C1(Methylthio)                   | 2154.07486 | 54 |      | Expt2 |
| DYEPPLSSAPCAPPPPPQQR         | 6 | 145587092                                                                                                                                                              | N-Term(iTRAQ4plex), C12(Methylthio)                  | 2296.09092 | 54 | 3.94 | Expt2 |
| ELOGYESTDFVGYFK              | 4 | 226246550;226246552                                                                                                                                                    | N-Term(iTRAQ4plex), K15(iTRAQ4plex)                  | 2071.03104 | 54 | 3.67 | Expt2 |
| OVLLSEPOEAAALYR              | 5 | 214010153                                                                                                                                                              | N-Term(iTRAQ4plex)                                   | 1832.01065 | 54 | 3.96 | Expt2 |

|                              |   |                                                       |                                                      |            |    |      |       |
|------------------------------|---|-------------------------------------------------------|------------------------------------------------------|------------|----|------|-------|
| AELIAQPELK                   | 2 | 82950147:82950149:149264086                           | N-Term(iTRAQ4plex), K10(iTRAQ4plex)                  | 1399.84856 | 54 |      | Expt2 |
| LVQAAQMLQSDPYVVPAR           | 1 | 31543942                                              | N-Term(iTRAQ4plex), M7(Oxidation)                    | 2134.11710 | 54 |      | Expt2 |
| WSGGPEPVCVDIDPPK             | 2 | 21703702                                              | N-Term(iTRAQ4plex), C8(Methylthio), K15(iTRAQ4plex)  | 1932.94658 | 54 | 3.41 | Expt2 |
| EGIECEVINLR                  | 4 | 18152793                                              | N-Term(iTRAQ4plex), C5(Methylthio)                   | 1464.73442 | 54 | 4.29 | Expt2 |
| NGSEADIDESLSYR               | 2 | 6678483                                               | N-Term(iTRAQ4plex)                                   | 1699.79387 | 54 |      | Expt2 |
| VVLFEMEAR                    | 2 | 25141335                                              | N-Term(iTRAQ4plex)                                   | 1237.67681 | 54 |      | Expt2 |
| TSGSAEDVALEILATR             | 2 | 145864475                                             | N-Term(iTRAQ4plex)                                   | 1776.94645 | 54 | 3.89 | Expt2 |
| AFALYSEDEGLVR                | 1 | 84370361                                              | N-Term(iTRAQ4plex)                                   | 1613.83464 | 54 |      | Expt2 |
| TLEVEIEPQVR                  | 2 | 110625998                                             | N-Term(iTRAQ4plex)                                   | 1385.77983 | 53 |      | Expt2 |
| SLLDLLLSESDMAOR              | 1 | 71061458:71061455                                     | N-Term(iTRAQ4plex), M14(Oxidation)                   | 2083.00284 | 53 |      | Expt2 |
| SVIEDVINDVR                  | 1 | 226958572                                             | N-Term(iTRAQ4plex)                                   | 1402.77178 | 53 |      | Expt2 |
| CIENLEELQSLR                 | 2 | 12963569                                              | N-Term(iTRAQ4plex), C1(Methylthio)                   | 1636.81719 | 53 | 3.97 | Expt2 |
| GMSLNLEPDMNVGVVFGNDK         | 2 | 6680748                                               | N-Term(iTRAQ4plex), M2(Oxidation), K20(iTRAQ4plex)   | 2408.24430 | 53 | 3.68 | Expt2 |
| DVPMNPQVDDDEGFR              | 1 | 144922627                                             | N-Term(iTRAQ4plex)                                   | 1975.87334 | 53 |      | Expt2 |
| IAVGSDSDLVIWDPDALK           | 3 | 209862992:6681219                                     | N-Term(iTRAQ4plex), K18(iTRAQ4plex)                  | 2202.19590 | 53 | 3.86 | Expt2 |
| FGFAIGSQAR                   | 2 | 71480098                                              | N-Term(iTRAQ4plex)                                   | 1298.69658 | 53 | 3.62 | Expt2 |
| NVETMNYADIER                 | 2 | 21313536                                              | N-Term(iTRAQ4plex)                                   | 1598.76201 | 53 | 4.06 | Expt2 |
| EDAVLYLEIPK                  | 2 | 16033863                                              | N-Term(iTRAQ4plex), K12(iTRAQ4plex)                  | 1690.99370 | 53 |      | Expt2 |
| VLANPQNSQVAR                 | 2 | 88014720                                              | N-Term(iTRAQ4plex)                                   | 1369.76982 | 53 |      | Expt2 |
| DGTVTAGNASGVSDGAGAVIHASEDAVK | 1 | 29126205                                              | N-Term(iTRAQ4plex), K28(iTRAQ4plex)                  | 2820.45224 | 53 |      | Expt2 |
| DAEGILEDLQSYR                | 2 | 21450053                                              | N-Term(iTRAQ4plex)                                   | 1652.82987 | 53 |      | Expt2 |
| AVGGILCNTYDYSYK              | 2 | 110625656:270309161                                   | N-Term(iTRAQ4plex), C8(Methylthio), K16(iTRAQ4plex)  | 2066.02073 | 53 | 3.74 | Expt2 |
| QTSAMSSFGGTGGGSR             | 1 | 6680606                                               | N-Term(iTRAQ4plex)                                   | 1730.82854 | 53 |      | Expt2 |
| INSAAFEAVVVTNTIPEQEDK        | 2 | 13386146                                              | N-Term(iTRAQ4plex), K20(iTRAQ4plex)                  | 2434.31687 | 53 | 4.03 | Expt2 |
| AVAALLTPEAEK                 | 1 | 189409138                                             | N-Term(iTRAQ4plex), K13(iTRAQ4plex)                  | 1613.97539 | 53 |      | Expt2 |
| GLPWSCSAEVMR                 | 2 | 9845253                                               | N-Term(iTRAQ4plex), C6(Methylthio)                   | 1654.74932 | 53 | 3.46 | Expt2 |
| GEGPEVDVNLPK                 | 4 | 61743961                                              | N-Term(iTRAQ4plex), K12(iTRAQ4plex)                  | 1541.84807 | 53 | 3.40 | Expt2 |
| DNFTLPEPNTGTEER              | 3 | 40254595                                              | N-Term(iTRAQ4plex), N11(Deamidated)                  | 1937.92058 | 53 | 4.07 | Expt2 |
| GASYLLMGQVEENR               | 2 | 125490382                                             | N-Term(iTRAQ4plex), M7(Oxidation)                    | 1726.85234 | 53 |      | Expt2 |
| AALSGANVLTLEIK               | 2 | 124494256                                             | N-Term(iTRAQ4plex), K14(iTRAQ4plex)                  | 1688.02732 | 53 |      | Expt2 |
| NINDAWCTNDMFR                | 1 | 82955559                                              | N-Term(iTRAQ4plex), C8(Methylthio)                   | 1888.82341 | 53 |      | Expt2 |
| NINNAWCTNDMFR                | 1 | 94402184                                              | N-Term(iTRAQ4plex), N4(Deamidated), C8(Methylthio)   | 1888.82341 | 53 |      | Expt2 |
| LLVPVAPPEVEDR                | 2 | 164663773                                             | N-Term(iTRAQ4plex)                                   | 1738.95696 | 53 |      | Expt2 |
| VTMQLNDR                     | 2 | 6680604:112983636:226823220:21489935:19526922:7106337 | N-Term(iTRAQ4plex)                                   | 1234.63567 | 53 |      | Expt2 |
| VTMQLNDR                     | 2 | 198278448                                             | N-Term(iTRAQ4plex), N8(Deamidated)                   | 1234.63567 | 53 |      | Expt2 |
| ASSAGVLVS                    | 1 | 31981577                                              | N-Term(iTRAQ4plex)                                   | 934.53638  | 53 |      | Expt2 |
| NLPLGVOEGEPFSEATLFTK         | 2 | 77404392                                              | N-Term(iTRAQ4plex), K21(iTRAQ4plex)                  | 2594.36808 | 53 | 3.43 | Expt2 |
| FALGSLGSLVMSLAR              | 3 | 13384778                                              | N-Term(iTRAQ4plex), M13(Oxidation)                   | 1738.97037 | 52 |      | Expt2 |
| VNVDIINFEGEEVNTK             | 2 | 6679505                                               | N-Term(iTRAQ4plex), K17(iTRAQ4plex)                  | 2237.15512 | 52 | 4.69 | Expt2 |
| IINFLYSTVGALDK               | 2 | 226423922                                             | N-Term(iTRAQ4plex), K14(iTRAQ4plex)                  | 1842.06205 | 52 | 3.99 | Expt2 |
| ELLALDSDPEGR                 | 4 | 115270960                                             | N-Term(iTRAQ4plex)                                   | 1557.82610 | 52 | 3.83 | Expt2 |
| VVLVTGAGGGLGR                | 1 | 31982273                                              | N-Term(iTRAQ4plex)                                   | 1299.78862 | 52 |      | Expt2 |
| VNSILGCSQ                    | 3 | 160358829                                             | N-Term(iTRAQ4plex), C7(Methylthio)                   | 1110.54289 | 52 |      | Expt2 |
| VEDLTFSPFCQVK                | 1 | 9790109                                               | N-Term(iTRAQ4plex), C11(Methylthio), K15(iTRAQ4plex) | 2061.07541 | 52 |      | Expt2 |
| APLATGEDDDDEVLDLVEFDEASK     | 2 | 149234234:56605979                                    | N-Term(iTRAQ4plex), K25(iTRAQ4plex)                  | 2979.38614 | 52 | 4.06 | Expt2 |
| TIGGGDSFTFFCETGAGK           | 2 | 6678467                                               | N-Term(iTRAQ4plex), C14(Methylthio), K20(iTRAQ4plex) | 2345.07639 | 52 | 3.49 | Expt2 |
| TNVIQSLAR                    | 2 | 13507622                                              | N-Term(iTRAQ4plex)                                   | 1258.76494 | 52 |      | Expt2 |
| ELDEYFTQANDQMEIHDGLIR        | 4 | 82950147:82950149:149264086                           | N-Term(iTRAQ4plex), M13(Oxidation)                   | 2673.29514 | 52 | 4.10 | Expt2 |
| DFNDTSQDPDFQVVVELDLK         | 1 | 110347487                                             | N-Term(iTRAQ4plex), K20(iTRAQ4plex)                  | 2614.28977 | 52 |      | Expt2 |
| EGDOTSNINPADIVFVLK           | 2 | 9055242                                               | N-Term(iTRAQ4plex), K18(iTRAQ4plex)                  | 2248.21378 | 52 | 3.42 | Expt2 |
| NVLDTSWPTPPALR               | 1 | 124494242:124494244                                   | N-Term(iTRAQ4plex)                                   | 1807.98454 | 52 |      | Expt2 |
| AEGVTALPYFLFK                | 1 | 149275267:22550098                                    | N-Term(iTRAQ4plex), K13(iTRAQ4plex)                  | 1744.00273 | 52 |      | Expt2 |
| DDITFVSGAPR                  | 2 | 31982236                                              | N-Term(iTRAQ4plex)                                   | 1321.69170 | 52 | 3.55 | Expt2 |
| LSDGFNGADLR                  | 4 | 27754103                                              | N-Term(iTRAQ4plex)                                   | 1308.66838 | 52 | 3.85 | Expt2 |
| IHYOASPDEGALVR               | 1 | 84781802:7106257                                      | N-Term(iTRAQ4plex)                                   | 1746.95671 | 52 |      | Expt2 |

|                            |   |                                       |                                                                                      |            |    |      |       |
|----------------------------|---|---------------------------------------|--------------------------------------------------------------------------------------|------------|----|------|-------|
| GAEYVADVLC                 | 2 | 226246550                             | N-Term(iTRAQ4plex), K10(iTRAQ4plex)                                                  | 1352.77324 | 52 | 3.68 | Expt2 |
| GEQQLTGMPTGR               | 1 | 226423931                             | N-Term(iTRAQ4plex), M8(Oxidation)                                                    | 1363.67864 | 52 |      | Expt2 |
| SENEEFVEVGR                | 3 | 30794476                              | N-Term(iTRAQ4plex)                                                                   | 1438.69658 | 52 | 3.76 | Expt2 |
| IFDLQLPNFNSEEK             | 2 | 6679535                               | N-Term(iTRAQ4plex), K15(iTRAQ4plex)                                                  | 2079.10801 | 52 | 3.82 | Expt2 |
| GEDLTEEDGGHIR              | 2 | 6753882                               | N-Term(iTRAQ4plex)                                                                   | 1676.80742 | 52 | 3.80 | Expt2 |
| MLSNENFEYLR                | 1 | 149260240                             | N-Term(iTRAQ4plex), M1(Oxidation)                                                    | 1704.80571 | 52 |      | Expt2 |
| ELYTLNENNVVDDDNMFR         | 1 | 6679084:6679082                       | N-Term(iTRAQ4plex)                                                                   | 2537.16904 | 52 |      | Expt2 |
| DMGLOELAEQLQTTK            | 2 | 165377185                             | N-Term(iTRAQ4plex), K15(iTRAQ4plex)                                                  | 1993.06473 | 52 | 3.72 | Expt2 |
| VNVEAPNVNMEGLGK            | 2 | 61743961                              | N-Term(iTRAQ4plex), M10(Oxidation), K16(iTRAQ4plex)                                  | 1932.00931 | 52 | 3.51 | Expt2 |
| LEAELGNMQGLVEDFK           | 1 | 114145561                             | N-Term(iTRAQ4plex), M8(Oxidation), K16(iTRAQ4plex)                                   | 2097.08567 | 52 |      | Expt2 |
| DLPPVSGSIWAK               | 1 | 134288917                             | N-Term(iTRAQ4plex), K13(iTRAQ4plex)                                                  | 1670.97368 | 52 |      | Expt2 |
| AEGESEAPNPEPR              | 1 | 165377173                             | N-Term(iTRAQ4plex)                                                                   | 1526.72429 | 52 |      | Expt2 |
| ALLLOGSNEIELR              | 4 | 34328108                              | N-Term(iTRAQ4plex)                                                                   | 1599.92156 | 52 | 3.66 | Expt2 |
| YSOTGNVELAVLSR             | 1 | 46195798                              | N-Term(iTRAQ4plex)                                                                   | 1815.94255 | 52 |      | Expt2 |
| GSNNVALGYDEGSIIVK          | 1 | 29789080                              | N-Term(iTRAQ4plex), K17(iTRAQ4plex)                                                  | 2024.09708 | 52 |      | Expt2 |
| SPTDWALFTYEGNSNDIR         | 4 | 7304993:226423871:226423873           | N-Term(iTRAQ4plex)                                                                   | 2230.05693 | 52 | 3.40 | Expt2 |
| IIDTNTCNSEAYGGR            | 2 | 148747219                             | N-Term(iTRAQ4plex), C7(Methylthio)                                                   | 1932.85222 | 52 |      | Expt2 |
| ETIDAVNPNAIPGR             | 2 | 194328715;194328717:6756051;194328719 | N-Term(iTRAQ4plex)                                                                   | 1496.81804 | 51 | 3.95 | Expt2 |
| MLGQMTDOVADLR              | 1 | 31543942                              | N-Term(iTRAQ4plex), M1(Oxidation)                                                    | 1637.81328 | 51 |      | Expt2 |
| FTDEYQLFEELGK              | 1 | 70906477:18158420:70906479            | N-Term(iTRAQ4plex), K13(iTRAQ4plex)                                                  | 1906.97185 | 51 |      | Expt2 |
| AETMTVSSLAIR               | 1 | 7305029:54873604                      | N-Term(iTRAQ4plex)                                                                   | 1422.77434 | 51 |      | Expt2 |
| QQSEEDLLLODFS              | 2 | 21312968                              | N-Term(iTRAQ4plex)                                                                   | 1851.92327 | 51 | 4.01 | Expt2 |
| GDPEGAGPOGDOGR             | 2 | 6753484                               | N-Term(iTRAQ4plex)                                                                   | 1484.68412 | 51 |      | Expt2 |
| GEDVDQLITCISK              | 2 | 88758582:88758584                     | N-Term(iTRAQ4plex), C10(Methylthio), K14(iTRAQ4plex)                                 | 1882.95664 | 51 | 4.19 | Expt2 |
| IMEGPAFNFLDAPAVR           | 2 | 18152793                              | N-Term(iTRAQ4plex), M2(Oxidation)                                                    | 1907.98564 | 51 | 3.71 | Expt2 |
| CVDVDECPAAEPCGK            | 2 | 168693628                             | N-Term(iTRAQ4plex), C1(Methylthio), C7(Methylthio), C14(Methylthio), K16(iTRAQ4plex) | 2074.83139 | 51 | 3.59 | Expt2 |
| VSVNPSYLVPESDYTNVVR        | 3 | 148747377                             | N-Term(iTRAQ4plex)                                                                   | 2396.22075 | 51 | 3.76 | Expt2 |
| SDPLLMIPTSENPFK            | 2 | 13384618                              | N-Term(iTRAQ4plex), K16(iTRAQ4plex)                                                  | 2034.08403 | 51 | 4.21 | Expt2 |
| LPVAVTADLR                 | 1 | 149257125:149257127:38142460          | N-Term(iTRAQ4plex)                                                                   | 1198.72930 | 51 |      | Expt2 |
| VAVNLIINNGR                | 1 | 23956084                              | N-Term(iTRAQ4plex), N8(Deamidated)                                                   | 1214.70012 | 51 |      | Expt2 |
| AVLLOGSNDVELVAEGNSR        | 1 | 111120329                             | N-Term(iTRAQ4plex)                                                                   | 2115.12174 | 51 |      | Expt2 |
| EYOELMNTK                  | 1 | 20911031                              | N-Term(iTRAQ4plex), M6(Oxidation), K9(iTRAQ4plex)                                    | 1459.74297 | 51 |      | Expt2 |
| DLQNVNITLR                 | 2 | 6679299:85702063                      | N-Term(iTRAQ4plex)                                                                   | 1329.76103 | 51 | 3.78 | Expt2 |
| MALDIEIATYR                | 1 | 31982755                              | N-Term(iTRAQ4plex), M1(Oxidation)                                                    | 1455.76824 | 51 |      | Expt2 |
| AVEYLLMGIPGDR              | 2 | 171906578                             | N-Term(iTRAQ4plex), M7(Oxidation)                                                    | 1593.84563 | 51 |      | Expt2 |
| CNEGYEVAPDGR               | 3 | 118197277                             | N-Term(iTRAQ4plex), C1(Methylthio)                                                   | 1499.63567 | 51 | 4.09 | Expt2 |
| DFSSVFQYLR                 | 2 | 21704140                              | N-Term(iTRAQ4plex)                                                                   | 1405.72612 | 51 | 3.55 | Expt2 |
| MSPDEGOEELVEVQALK          | 2 | 111154067                             | N-Term(iTRAQ4plex), K18(iTRAQ4plex)                                                  | 2349.13968 | 51 | 4.88 | Expt2 |
| IEDPNQFVPLNTNPTVELEK       | 2 | 31542111:255759888:255759890          | N-Term(iTRAQ4plex), K20(iTRAQ4plex)                                                  | 2585.37236 | 51 | 4.25 | Expt2 |
| ALLOAQEP                   | 3 | 19526986                              | N-Term(iTRAQ4plex)                                                                   | 1013.57445 | 51 |      | Expt2 |
| TGOEVAQAQES                | 1 | 13385088                              | N-Term(iTRAQ4plex)                                                                   | 1291.62944 | 51 |      | Expt2 |
| TGYTLDVTTGSR               | 1 | 33859724:114145493:29788787           | N-Term(iTRAQ4plex)                                                                   | 1455.76177 | 51 |      | Expt2 |
| ALYEAELSQMOTHISDTSVLSMDNNR | 3 | 54607171                              | N-Term(iTRAQ4plex), M10(Oxidation), M23(Oxidation)                                   | 3228.53501 | 51 | 3.83 | Expt2 |
| VIDIFDTDNGEVEDFK           | 1 | 84794597                              | N-Term(iTRAQ4plex), K16(iTRAQ4plex)                                                  | 2072.05515 | 51 |      | Expt2 |
| LLPQLSYLDGYDR              | 1 | 18700032:149253242                    | N-Term(iTRAQ4plex)                                                                   | 1696.91045 | 51 |      | Expt2 |
| IGADGTQVAMVQFTDDPR         | 4 | 226423922                             | N-Term(iTRAQ4plex)                                                                   | 2065.01877 | 51 | 4.33 | Expt2 |
| AMNGESLDGR                 | 1 | 149234330:37497112                    | N-Term(iTRAQ4plex), N3(Deamidated)                                                   | 1194.55803 | 51 |      | Expt2 |
| AIPNOGELVIR                | 3 | 87299637                              | N-Term(iTRAQ4plex)                                                                   | 1466.88640 | 51 | 3.63 | Expt2 |
| DYTNLPEAAPLLTILDMSAR       | 1 | 149262205:6679160                     | N-Term(iTRAQ4plex), M17(Oxidation)                                                   | 2364.23270 | 51 |      | Expt2 |
| ECOGLQVQVLLQK              | 2 | 111185907                             | N-Term(iTRAQ4plex), C2(Methylthio), K14(iTRAQ4plex)                                  | 1935.02250 | 51 | 4.27 | Expt2 |
| IFTVDNLLPVGK               | 3 | 126518317                             | N-Term(iTRAQ4plex), K13(iTRAQ4plex)                                                  | 1718.01323 | 51 | 3.50 | Expt2 |
| VLLSSPGLLEFYR              | 1 | 226958577                             | N-Term(iTRAQ4plex)                                                                   | 1766.98686 | 51 |      | Expt2 |
| YWEAFLPEAK                 | 1 | 13385878:71043944                     | N-Term(iTRAQ4plex), K10(iTRAQ4plex)                                                  | 1541.83098 | 51 |      | Expt2 |
| AQYDAIAAR                  | 2 | 124249090                             | N-Term(iTRAQ4plex)                                                                   | 1122.60369 | 50 | 3.74 | Expt2 |
| TQDATGPELLIPASIEFR         | 1 | 145587092                             | N-Term(iTRAQ4plex)                                                                   | 2102.13260 | 50 |      | Expt2 |

|                                 |    |                                                                                                                   |                                                                     |            |    |      |      |       |
|---------------------------------|----|-------------------------------------------------------------------------------------------------------------------|---------------------------------------------------------------------|------------|----|------|------|-------|
| EGGSLPPOAR                      | 1  | 149253040:183979966                                                                                               | N-Term(ITRAQ4plex)                                                  | 1155.62676 | 50 |      |      | Expt2 |
| ALYDFEPENEELGFK                 | 2  | 31560792                                                                                                          | N-Term(ITRAQ4plex), K16(ITRAQ4plex)                                 | 2146.06308 | 50 |      | 3.69 | Expt2 |
| IVSOEPAGMSMFLISR                | 1  | 110625833                                                                                                         | N-Term(ITRAQ4plex), M9(Oxidation), M11(Oxidation)                   | 1941.99259 | 50 |      |      | Expt2 |
| FGDSNTVMR                       | 3  | 82950147:82950149:149264086                                                                                       | N-Term(ITRAQ4plex)                                                  | 1170.57524 | 50 |      |      | Expt2 |
| ELGAFGLQVPSELGGLSNTQYAR         | 1  | 23956084                                                                                                          | N-Term(ITRAQ4plex)                                                  | 2721.43833 | 50 |      |      | Expt2 |
| EGYSGVLLSR                      | 1  | 6753086                                                                                                           | N-Term(ITRAQ4plex)                                                  | 1281.68901 | 50 |      |      | Expt2 |
| TLGTAAALTVOSQOENLR              | 1  | 116734870                                                                                                         | N-Term(ITRAQ4plex)                                                  | 2076.11826 | 50 |      |      | Expt2 |
| DLAEDLYDGOVLQK                  | 1  | 31982526                                                                                                          | N-Term(ITRAQ4plex), K14(ITRAQ4plex)                                 | 1895.00603 | 50 |      |      | Expt2 |
| LSLEGIVVQR                      | 1  | 39930425                                                                                                          | N-Term(ITRAQ4plex)                                                  | 1257.76665 | 50 |      |      | Expt2 |
| EISPDITLLDLQNNDISELR            | 47 | 20137008                                                                                                          | N-Term(ITRAQ4plex), N13(Deamidated)                                 | 2431.25461 | 50 | 0.99 | 6.96 | Expt2 |
| ELEDATETADAMNR                  | 2  | 114326446                                                                                                         | N-Term(ITRAQ4plex)                                                  | 1709.78301 | 50 |      | 3.85 | Expt2 |
| MINLSVPDTIDER                   | 3  | 21704120:262050551:31543113                                                                                       | N-Term(ITRAQ4plex), M1(Oxidation)                                   | 1662.84990 | 50 |      | 3.83 | Expt2 |
| EVASNTEMIQTSK                   | 1  | 226823220                                                                                                         | N-Term(ITRAQ4plex), K13(ITRAQ4plex)                                 | 1725.89994 | 50 |      |      | Expt2 |
| SPLIFSDCNMENAVK                 | 1  | 115334671                                                                                                         | N-Term(ITRAQ4plex), C9(Methylthio), K16(ITRAQ4plex)                 | 2115.06095 | 50 |      |      | Expt2 |
| GSVNMFPMDFLTK                   | 1  | 6678449                                                                                                           | N-Term(ITRAQ4plex), K13(ITRAQ4plex)                                 | 1774.91680 | 50 |      |      | Expt2 |
| DIDITSPEFMK                     | 3  | 61743961                                                                                                          | N-Term(ITRAQ4plex), M10(Oxidation), K12(ITRAQ4plex)                 | 1712.90068 | 50 |      | 3.68 | Expt2 |
| TISPQNMIDILQNLMIK               | 2  | 168693635                                                                                                         | N-Term(ITRAQ4plex), K17(ITRAQ4plex)                                 | 2244.23783 | 50 |      | 4.54 | Expt2 |
| DNLSPLLGOCLTER                  | 2  | 6753798                                                                                                           | N-Term(ITRAQ4plex), C10(Methylthio)                                 | 1732.85173 | 50 |      | 3.40 | Expt2 |
| AEPATPAEAAQSDR                  | 2  | 31982724                                                                                                          | N-Term(ITRAQ4plex)                                                  | 1557.76787 | 50 |      | 3.92 | Expt2 |
| LYTVDYLSMMVGR                   | 1  | 30519997                                                                                                          | N-Term(ITRAQ4plex), M10(Oxidation)                                  | 1747.88811 | 50 |      |      | Expt2 |
| VALVYQGMNEPPGAR                 | 6  | 31980648                                                                                                          | N-Term(ITRAQ4plex), Q7(Deamidated)                                  | 1746.91570 | 50 | 0.98 | 4.56 | Expt2 |
| SLGONPTEAELQGMVNEIDK            | 2  | 13386230                                                                                                          | N-Term(ITRAQ4plex), K20(ITRAQ4plex)                                 | 2461.25534 | 50 |      | 4.59 | Expt2 |
| AGGANYYDAOSE                    | 6  | 19482160                                                                                                          | N-Term(ITRAQ4plex)                                                  | 1226.54289 | 50 |      |      | Expt2 |
| TVLCGTGCGPADK                   | 1  | 162283730                                                                                                         | N-Term(ITRAQ4plex), C4(Methylthio), C7(Methylthio), K13(ITRAQ4plex) | 1672.77532 | 50 |      |      | Expt2 |
| LEEDVLPMEGIK                    | 2  | 148747546                                                                                                         | N-Term(ITRAQ4plex), M9(Oxidation), K12(ITRAQ4plex)                  | 1676.90630 | 50 |      |      | Expt2 |
| TPVLLMLGQEDR                    | 1  | 214010153                                                                                                         | N-Term(ITRAQ4plex)                                                  | 1515.83647 | 50 |      |      | Expt2 |
| LFVGGAPPEFQPSPLR                | 1  | 117647249                                                                                                         | N-Term(ITRAQ4plex)                                                  | 1856.02568 | 50 |      |      | Expt2 |
| SSVLESVGR                       | 1  | 71061458:71061455                                                                                                 | N-Term(ITRAQ4plex)                                                  | 1190.68535 | 50 |      |      | Expt2 |
| IYELAAGGTAVGTGLNTR              | 1  | 226823367                                                                                                         | N-Term(ITRAQ4plex)                                                  | 1908.03092 | 50 |      |      | Expt2 |
| FDAGELITQR                      | 4  | 6679299:85702063                                                                                                  | N-Term(ITRAQ4plex)                                                  | 1293.69353 | 50 |      | 3.71 | Expt2 |
| LSTIALALGVER                    | 2  | 77539776:77539770:8394027                                                                                         | N-Term(ITRAQ4plex)                                                  | 1386.84905 | 50 |      |      | Expt2 |
| NYILDQTNVYGSQR                  | 1  | 21450323                                                                                                          | N-Term(ITRAQ4plex)                                                  | 1885.94805 | 50 |      |      | Expt2 |
| MFEDPETTR                       | 1  | 45476573                                                                                                          | N-Term(ITRAQ4plex)                                                  | 1269.59148 | 50 |      |      | Expt2 |
| ASETLTAQ                        | 5  | 160333304                                                                                                         | N-Term(ITRAQ4plex)                                                  | 964.50817  | 50 |      |      | Expt2 |
| ADDPSSYMEVVOAANASGNWEELVK       | 1  | 51491845                                                                                                          | N-Term(ITRAQ4plex), M8(Oxidation), K25(ITRAQ4plex)                  | 3014.43967 | 50 |      |      | Expt2 |
| ADLTAEMISAPLGDFR                | 2  | 9910142                                                                                                           | N-Term(ITRAQ4plex)                                                  | 1850.95513 | 50 |      | 4.26 | Expt2 |
| STIGVEFATR                      | 4  | 31980840:6679583                                                                                                  | N-Term(ITRAQ4plex)                                                  | 1224.67327 | 50 |      | 3.67 | Expt2 |
| SAADLISQAR                      | 3  | 209862992:6681219                                                                                                 | N-Term(ITRAQ4plex)                                                  | 1175.65166 | 50 |      |      | Expt2 |
| GLIEIISNAEYENIPR                | 2  | 40018610                                                                                                          | N-Term(ITRAQ4plex)                                                  | 2159.18589 | 50 |      | 4.33 | Expt2 |
| OPTVTSVCSESAQELAEGR             | 2  | 170650623:170650627                                                                                               | N-Term(ITRAQ4plex), C8(Methylthio)                                  | 2310.08438 | 50 |      | 3.41 | Expt2 |
| VLQLTSWDEDAWASK                 | 1  | 31543942                                                                                                          | N-Term(ITRAQ4plex), K15(ITRAQ4plex)                                 | 2037.06644 | 50 |      |      | Expt2 |
| ADIFMFDEPSSYLDVK                | 2  | 114205431                                                                                                         | N-Term(ITRAQ4plex), K16(ITRAQ4plex)                                 | 2165.07895 | 50 |      | 3.66 | Expt2 |
| IYVGNLPPDIR                     | 4  | 149262253:118582271                                                                                               | N-Term(ITRAQ4plex)                                                  | 1400.80522 | 50 |      | 3.54 | Expt2 |
| DGDAPLAAAAGVDLPGTAVPSGQEDATTAGR | 2  | 124517716                                                                                                         | N-Term(ITRAQ4plex)                                                  | 2995.47910 | 50 |      | 4.29 | Expt2 |
| DCTVEMPILK                      | 1  | 149253672:6753548:7304989                                                                                         | N-Term(ITRAQ4plex), C2(Methylthio), K10(ITRAQ4plex)                 | 1482.76775 | 50 |      |      | Expt2 |
| YFYDQCPAVAGYGPQLPDYNR           | 1  | 46593021                                                                                                          | N-Term(ITRAQ4plex), C6(Methylthio)                                  | 2869.31339 | 50 |      |      | Expt2 |
| STGGAPTFNVTVTMTAK               | 1  | 6755040                                                                                                           | N-Term(ITRAQ4plex), M14(Oxidation), K17(ITRAQ4plex)                 | 1987.04790 | 50 |      |      | Expt2 |
| IMNVIGEPIDER                    | 1  | 31980648                                                                                                          | N-Term(ITRAQ4plex), M2(Oxidation)                                   | 1545.81169 | 49 |      |      | Expt2 |
| ALAVGGLGSHR                     | 1  | 21312654                                                                                                          | N-Term(ITRAQ4plex)                                                  | 1270.79680 | 49 |      |      | Expt2 |
| AVEILADIQNSTLGEAIEIR            | 1  | 95113671                                                                                                          | N-Term(ITRAQ4plex)                                                  | 2428.31467 | 49 |      |      | Expt2 |
| TOAPAVATT                       | 5  | 149253083:82898647:149255335:82902507:94383782:94383784:149259263:63594466:149263154:149265803:149269495:94404463 | N-Term(ITRAQ4plex)                                                  | 1003.55681 | 49 |      |      | Expt2 |
| MLDYLGQSGETPQTDIR               | 4  | 6679891                                                                                                           | N-Term(ITRAQ4plex), M1(Oxidation)                                   | 2084.00699 | 49 |      | 3.66 | Expt2 |
| SFGPAVVMNR                      | 3  | 149267092:6857757                                                                                                 | N-Term(ITRAQ4plex), M8(Oxidation)                                   | 1237.64910 | 49 |      |      | Expt2 |

|                               |   |                                                            |                                                                                    |            |    |      |       |
|-------------------------------|---|------------------------------------------------------------|------------------------------------------------------------------------------------|------------|----|------|-------|
| NVGSAGVTVIIVR                 | 1 | 149258641;149258643;54292132                               | N-Term(iTRAQ4plex)                                                                 | 1414.85466 | 49 |      | Expt2 |
| LVAEFTTSLTNFOK                | 1 | 31560462                                                   | N-Term(iTRAQ4plex), K14(iTRAQ4plex)                                                | 1887.05399 | 49 |      | Expt2 |
| IGNEGIDVPIPR                  | 2 | 84662730                                                   | N-Term(iTRAQ4plex)                                                                 | 1480.82427 | 49 | 3.65 | Expt2 |
| EIILDDEDECLQIFR               | 2 | 145587092                                                  | N-Term(iTRAQ4plex), C9(Methylthio)                                                 | 2008.98577 | 49 | 3.45 | Expt2 |
| DGEAPDEPDSR                   | 1 | 116734870                                                  | N-Term(iTRAQ4plex)                                                                 | 1428.63701 | 49 |      | Expt2 |
| FTGVITGGR                     | 2 | 160707889;229092758                                        | N-Term(iTRAQ4plex)                                                                 | 1122.63750 | 49 |      | Expt2 |
| VGDOELNGITR                   | 2 | 93102409                                                   | N-Term(iTRAQ4plex), N8(Deamidated)                                                 | 1443.75847 | 49 |      | Expt2 |
| EEVPEEAFFGAAAPLLTQVPTVEAPEMMR | 2 | 23943828                                                   | N-Term(iTRAQ4plex), M28(Oxidation)                                                 | 3269.62864 | 49 |      | Expt2 |
| YGVSGYPTLK                    | 1 | 112293264                                                  | N-Term(iTRAQ4plex), K10(iTRAQ4plex)                                                | 1372.78520 | 49 |      | Expt2 |
| YTFEEIQOETDIPER               | 1 | 7710014                                                    | N-Term(iTRAQ4plex)                                                                 | 2041.98564 | 49 |      | Expt2 |
| IQMSNLMNOAR                   | 2 | 45504359                                                   | N-Term(iTRAQ4plex)                                                                 | 1449.74578 | 49 | 3.81 | Expt2 |
| VSDLLSTDER                    | 2 | 93102409                                                   | N-Term(iTRAQ4plex)                                                                 | 1391.74932 | 49 |      | Expt2 |
| SSGSLSPGLETEDPLEAR            | 1 | 124486923                                                  | N-Term(iTRAQ4plex)                                                                 | 1988.98638 | 49 |      | Expt2 |
| TLSFGSDLNAYTR                 | 2 | 146219837                                                  | N-Term(iTRAQ4plex)                                                                 | 1588.80852 | 49 | 3.56 | Expt2 |
| GLGSPEPGTTAPYLGR              | 1 | 21450253                                                   | N-Term(iTRAQ4plex)                                                                 | 1716.90105 | 49 |      | Expt2 |
| ASYVAPLTAQPATYR               | 1 | 86262142                                                   | N-Term(iTRAQ4plex)                                                                 | 1752.94072 | 49 |      | Expt2 |
| FLTVMMK                       | 1 | 24762230;149250304;149254145;149261725;149252400;149252492 | N-Term(iTRAQ4plex), K7(iTRAQ4plex)                                                 | 1157.67546 | 49 |      | Expt2 |
| LVOAAQMLQSDPYVVPAR            | 2 | 31543942                                                   | N-Term(iTRAQ4plex)                                                                 | 2118.12467 | 49 | 3.83 | Expt2 |
| VTGAVDVTLGAVONSVDK            | 3 | 13385312                                                   | N-Term(iTRAQ4plex), K18(iTRAQ4plex)                                                | 2061.14078 | 49 | 3.42 | Expt2 |
| GLVGIEFK                      | 1 | 82950147;82950149;149264086                                | N-Term(iTRAQ4plex), K8(iTRAQ4plex)                                                 | 1150.71868 | 49 |      | Expt2 |
| APSDLYQIILK                   | 1 | 160333229                                                  | N-Term(iTRAQ4plex), K11(iTRAQ4plex)                                                | 1548.92595 | 49 |      | Expt2 |
| AOINTWGGSSLR                  | 1 | 9506843;162287370;161760667                                | N-Term(iTRAQ4plex), C7(Methylthio)                                                 | 1469.67485 | 49 |      | Expt2 |
| LVLVSPTEQYDLSLR               | 1 | 70778897                                                   | N-Term(iTRAQ4plex)                                                                 | 1964.08664 | 49 |      | Expt2 |
| ELGDCCNFGPALGEVGEAMR          | 1 | 31560792                                                   | N-Term(iTRAQ4plex), C6(Methylthio)                                                 | 2270.00901 | 49 |      | Expt2 |
| VVMVSSMVSRLR                  | 2 | 113680352                                                  | N-Term(iTRAQ4plex)                                                                 | 1334.76091 | 49 | 3.43 | Expt2 |
| IANPVEGSSGR                   | 1 | 6754994                                                    | N-Term(iTRAQ4plex)                                                                 | 1230.66020 | 49 |      | Expt2 |
| VNLQMVYDPSVCR                 | 2 | 162138894                                                  | N-Term(iTRAQ4plex), C12(Methylthio)                                                | 1713.82659 | 49 | 3.86 | Expt2 |
| YLPAFEK                       | 1 | 149259801;149260087;169808401;50263046;154350202           | N-Term(iTRAQ4plex), K7(iTRAQ4plex)                                                 | 1155.65825 | 49 |      | Expt2 |
| QVTLEIGVNWNAFFIK              | 1 | 133778947                                                  | N-Term(iTRAQ4plex), K16(iTRAQ4plex)                                                | 2060.17069 | 49 |      | Expt2 |
| LLIEDLEAR                     | 1 | 12963633                                                   | N-Term(iTRAQ4plex)                                                                 | 1215.70452 | 49 |      | Expt2 |
| LOALEQETR                     | 4 | 112421039                                                  | N-Term(iTRAQ4plex)                                                                 | 1231.67644 | 49 | 3.46 | Expt2 |
| YGPMEPOVIEK                   | 2 | 90903233;90903235                                          | N-Term(iTRAQ4plex), K12(iTRAQ4plex)                                                | 1707.88896 | 49 | 3.60 | Expt2 |
| ISEQFTAMFR                    | 3 | 33859488;31981939;7106439;22165384;21746161;12963615       | N-Term(iTRAQ4plex)                                                                 | 1373.70268 | 49 | 3.64 | Expt2 |
| GFAFYFENVDDAK                 | 2 | 6677975                                                    | N-Term(iTRAQ4plex), K14(iTRAQ4plex)                                                | 1909.96306 | 49 |      | Expt2 |
| DGQVIGIGAGQOSR                | 3 | 149234067                                                  | N-Term(iTRAQ4plex)                                                                 | 1529.81841 | 49 | 3.52 | Expt2 |
| DLFPEESK                      | 1 | 188497724                                                  | N-Term(iTRAQ4plex), K9(iTRAQ4plex)                                                 | 1415.73784 | 49 |      | Expt2 |
| GDGVVLVAPPLR                  | 3 | 13385806                                                   | N-Term(iTRAQ4plex)                                                                 | 1336.80766 | 49 | 3.52 | Expt2 |
| GWEEGVAQMSVGQR                | 1 | 6679803                                                    | N-Term(iTRAQ4plex)                                                                 | 1677.81731 | 49 |      | Expt2 |
| NATNVEQSFMTMAAEIK             | 1 | 6679587                                                    | N-Term(iTRAQ4plex), M10(Oxidation), K17(iTRAQ4plex)                                | 2189.09067 | 49 |      | Expt2 |
| LLDEAIAVK                     | 1 | 13928670                                                   | N-Term(iTRAQ4plex), K10(iTRAQ4plex)                                                | 1387.83879 | 49 |      | Expt2 |
| GVIDMGNLSLIER                 | 2 | 115496850                                                  | N-Term(iTRAQ4plex), M5(Oxidation)                                                  | 1463.76079 | 49 |      | Expt2 |
| DLMSWINGIR                    | 1 | 115496850                                                  | N-Term(iTRAQ4plex), N7(Deamidated)                                                 | 1349.70305 | 49 |      | Expt2 |
| FODLGAAYEVLSDSEK              | 2 | 110625998                                                  | N-Term(iTRAQ4plex), K16(iTRAQ4plex)                                                | 2060.04325 | 49 | 3.50 | Expt2 |
| YQLNLPSPYDTECVYR              | 5 | 21553309                                                   | N-Term(iTRAQ4plex), C13(Methylthio)                                                | 2151.00547 | 49 | 3.42 | Expt2 |
| GFYYLMOELPOER                 | 4 | 31982520                                                   | N-Term(iTRAQ4plex)                                                                 | 1817.90366 | 49 | 4.05 | Expt2 |
| EQFDLTPPEPPVDPNQEVPPGPPR      | 1 | 226442901                                                  | N-Term(iTRAQ4plex)                                                                 | 2800.40165 | 48 |      | Expt2 |
| DIDECLNGR                     | 7 | 118197277                                                  | N-Term(iTRAQ4plex), C5(Methylthio), N8(Deamidated)                                 | 1353.59270 | 48 | 3.79 | Expt2 |
| TDLVPAFQNLK                   | 1 | 8394027                                                    | N-Term(iTRAQ4plex), K12(iTRAQ4plex)                                                | 1664.93523 | 48 |      | Expt2 |
| LTTDFNVIQALSK                 | 2 | 6678143                                                    | N-Term(iTRAQ4plex), K14(iTRAQ4plex)                                                | 1837.06968 | 48 | 4.16 | Expt2 |
| ILLTEPPMNPTK                  | 1 | 22122825                                                   | N-Term(iTRAQ4plex), M8(Oxidation), K12(iTRAQ4plex)                                 | 1657.94402 | 48 |      | Expt2 |
| SYFSFTDDIISOPMLK              | 2 | 27552760                                                   | N-Term(iTRAQ4plex), K17(iTRAQ4plex)                                                | 2267.15384 | 48 | 3.59 | Expt2 |
| CEMEAQNQENMLLDIK              | 3 | 226823220                                                  | N-Term(iTRAQ4plex), C1(Methylthio), M3(Oxidation), M12(Oxidation), K17(iTRAQ4plex) | 2438.10111 | 48 | 3.83 | Expt2 |
| IQPSGGTINIEALLR               | 2 | 226874935                                                  | N-Term(iTRAQ4plex), Q2(Deamidated)                                                 | 1727.96001 | 48 | 3.73 | Expt2 |
| FPEDVSEELIQEITR               | 1 | 157277952;157277948                                        | N-Term(iTRAQ4plex)                                                                 | 2224.13376 | 48 |      | Expt2 |

|                            |   |                                                                                      |                                                                       |            |    |      |       |
|----------------------------|---|--------------------------------------------------------------------------------------|-----------------------------------------------------------------------|------------|----|------|-------|
| AGNWAAIYQDIR               | 2 | 133505845                                                                            | N-Term(iTRAQ4plex)                                                    | 1521.79949 | 48 | 3.49 | Expt2 |
| YTMGDAPDYDR                | 1 | 6680121:28076911                                                                     | N-Term(iTRAQ4plex)                                                    | 1447.62871 | 48 |      | Expt2 |
| IEDENDNYPIFTQK             | 2 | 7305007                                                                              | N-Term(iTRAQ4plex), K14(iTRAQ4plex)                                   | 2013.99101 | 48 | 3.79 | Expt2 |
| AEDEDVLTDPGTR              | 1 | 171184413;61888844;171184415;61888842                                                | N-Term(iTRAQ4plex)                                                    | 1660.83245 | 48 |      | Expt2 |
| VLDISIPASPEIQIR            | 1 | 31982223                                                                             | N-Term(iTRAQ4plex)                                                    | 1810.02481 | 48 |      | Expt2 |
| TVSLNNLSADEVTR             | 1 | 31981600                                                                             | N-Term(iTRAQ4plex)                                                    | 1662.88310 | 48 |      | Expt2 |
| GEIDASVPMEADLR             | 2 | 61743961                                                                             | N-Term(iTRAQ4plex)                                                    | 1775.86040 | 48 | 4.40 | Expt2 |
| MEEADALIESLCR              | 2 | 74315975                                                                             | N-Term(iTRAQ4plex), C12(Methylthio)                                   | 1669.77617 | 48 |      | Expt2 |
| SQDDIIPPSR                 | 2 | 226423922                                                                            | N-Term(iTRAQ4plex)                                                    | 1271.67095 | 48 |      | Expt2 |
| AQIWDTAGLER                | 2 | 31980838                                                                             | N-Term(iTRAQ4plex)                                                    | 1403.73992 | 48 |      | Expt2 |
| GETLGLIGFGR                | 2 | 6753548;282721029                                                                    | N-Term(iTRAQ4plex)                                                    | 1263.71880 | 48 | 3.44 | Expt2 |
| LVGYLGTYYQATDEDTGK         | 2 | 110625833                                                                            | N-Term(iTRAQ4plex), K18(iTRAQ4plex)                                   | 2232.16971 | 48 | 4.50 | Expt2 |
| VSYPFTVPGVYIVSTK           | 3 | 145966915                                                                            | N-Term(iTRAQ4plex), K16(iTRAQ4plex)                                   | 2045.15178 | 48 | 3.44 | Expt2 |
| AQPSVSLGAPYR               | 3 | 86262142                                                                             | N-Term(iTRAQ4plex)                                                    | 1389.75932 | 48 | 3.55 | Expt2 |
| DVYEDELVPVFETVGR           | 1 | 188497698                                                                            | N-Term(iTRAQ4plex)                                                    | 2011.01641 | 48 |      | Expt2 |
| LGNAGIAALCPGLLLPSCK        | 2 | 31981748;285402638;285402659                                                         | N-Term(iTRAQ4plex), C10(Methylthio), C18(Methylthio), K19(iTRAQ4plex) | 2191.17295 | 48 | 4.19 | Expt2 |
| IAEFAFEYAR                 | 4 | 18250284                                                                             | N-Term(iTRAQ4plex)                                                    | 1360.70220 | 48 | 3.95 | Expt2 |
| MPEOEYEFPEPR               | 1 | 32189436                                                                             | N-Term(iTRAQ4plex)                                                    | 1695.78081 | 48 |      | Expt2 |
| EMYDDGVGFFPQSQPDLIGDK      | 2 | 15011884                                                                             | N-Term(iTRAQ4plex), K21(iTRAQ4plex)                                   | 2646.26639 | 48 | 4.11 | Expt2 |
| NSYPLDAVGLSDSVTIFR         | 2 | 31982236                                                                             | N-Term(iTRAQ4plex)                                                    | 2185.12461 | 48 | 3.90 | Expt2 |
| WLAIDANAR                  | 2 | 88014720                                                                             | N-Term(iTRAQ4plex)                                                    | 1173.65349 | 48 |      | Expt2 |
| OGLPLTFADPSDYNK            | 2 | 18079339                                                                             | N-Term(iTRAQ4plex), K16(iTRAQ4plex)                                   | 2067.11112 | 48 | 3.71 | Expt2 |
| GPAGPOGPR                  | 5 | 34328108                                                                             | N-Term(iTRAQ4plex)                                                    | 980.54106  | 48 |      | Expt2 |
| LEASITEYA                  | 3 | 6755911                                                                              | N-Term(iTRAQ4plex)                                                    | 1140.59294 | 48 |      | Expt2 |
| ALLTLADGR                  | 1 | 149254235;160707925                                                                  | N-Term(iTRAQ4plex)                                                    | 1073.64507 | 48 |      | Expt2 |
| LEDTENWLYEDGEDQPK          | 3 | 112293266                                                                            | N-Term(iTRAQ4plex), K17(iTRAQ4plex)                                   | 2369.10733 | 48 | 3.96 | Expt2 |
| FNPVTGCVPPR                | 4 | 160358829                                                                            | N-Term(iTRAQ4plex)                                                    | 1356.74004 | 48 | 3.47 | Expt2 |
| SPFTVGVAAPLDLSK            | 2 | 145966915                                                                            | N-Term(iTRAQ4plex), K15(iTRAQ4plex)                                   | 1790.03757 | 48 | 3.93 | Expt2 |
| TLAEINANR                  | 1 | 6753658                                                                              | N-Term(iTRAQ4plex)                                                    | 1145.63945 | 48 |      | Expt2 |
| AIVDALPPCESACSLPTDVK       | 2 | 27754065                                                                             | N-Term(iTRAQ4plex), C10(Methylthio), C14(Methylthio), K22(iTRAQ4plex) | 2621.26169 | 48 | 3.67 | Expt2 |
| EALQLMATYLPK               | 1 | 74315975                                                                             | N-Term(iTRAQ4plex), K12(iTRAQ4plex)                                   | 1665.95670 | 48 |      | Expt2 |
| LPIPSQVLTINPALPVEDAAEDYAR  | 2 | 13384778                                                                             | N-Term(iTRAQ4plex)                                                    | 2951.55356 | 48 | 3.90 | Expt2 |
| SLLDLENGR                  | 7 | 112421039                                                                            | N-Term(iTRAQ4plex), N7(Deamidated)                                    | 1161.62651 | 48 |      | Expt2 |
| GDDGEVGPR                  | 1 | 164565411                                                                            | N-Term(iTRAQ4plex)                                                    | 1045.50469 | 48 |      | Expt2 |
| GDTTITMLR                  | 1 | 111074529                                                                            | N-Term(iTRAQ4plex)                                                    | 1139.58611 | 48 |      | Expt2 |
| LYEIGAGTSEVR               | 3 | 9789985                                                                              | N-Term(iTRAQ4plex)                                                    | 1438.76641 | 48 | 3.88 | Expt2 |
| GOPFEVLLIATEEGFK           | 2 | 31543120                                                                             | N-Term(iTRAQ4plex), K16(iTRAQ4plex)                                   | 2066.14121 | 48 | 3.54 | Expt2 |
| DFTLAMAAR                  | 1 | 86439989                                                                             | N-Term(iTRAQ4plex)                                                    | 1139.60051 | 47 |      | Expt2 |
| TMLELLNQLDGFDSR            | 2 | 6679501                                                                              | N-Term(iTRAQ4plex), M2(Oxidation)                                     | 1911.96567 | 47 |      | Expt2 |
| TSLALDESIFR                | 2 | 9506945                                                                              | N-Term(iTRAQ4plex)                                                    | 1395.76286 | 47 | 3.70 | Expt2 |
| LEAMCFDGVR                 | 1 | 63635154;94392989;149263419;83022256;149274274;83020517;85701506;169808420;158631225 | N-Term(iTRAQ4plex), C5(Methylthio)                                    | 1330.60796 | 47 |      | Expt2 |
| GPAPLGTFOVITPQR            | 1 | 229608895                                                                            | N-Term(iTRAQ4plex)                                                    | 1713.94084 | 47 |      | Expt2 |
| CLPVTLENGR                 | 1 | 109627652                                                                            | N-Term(iTRAQ4plex), C1(Methylthio), N9(Deamidated)                    | 1421.69121 | 47 |      | Expt2 |
| DAQLAGSPELLEFLGTR          | 2 | 160948577                                                                            | N-Term(iTRAQ4plex)                                                    | 1961.05205 | 47 | 3.63 | Expt2 |
| EMFEDTVEER                 | 2 | 157909799                                                                            | N-Term(iTRAQ4plex)                                                    | 1428.64629 | 47 | 3.45 | Expt2 |
| DESSPYAAMLAQDVAQR          | 2 | 31981100                                                                             | N-Term(iTRAQ4plex), M9(Oxidation)                                     | 2082.98893 | 47 | 4.33 | Expt2 |
| CMQLTDFILK                 | 3 | 149257159;13385472                                                                   | N-Term(iTRAQ4plex), C1(Methylthio), K10(iTRAQ4plex)                   | 1545.80857 | 47 |      | Expt2 |
| TPSYEPOETDSLQGMETK         | 2 | 112421039                                                                            | N-Term(iTRAQ4plex), M15(Oxidation), K18(iTRAQ4plex)                   | 2345.09928 | 47 | 4.37 | Expt2 |
| SIQQVVAR                   | 4 | 13384754                                                                             | N-Term(iTRAQ4plex), Q3(Deamidated)                                    | 1045.60149 | 47 |      | Expt2 |
| GPAIGGALPGISIQGPEGNLQMPGIK | 1 | 61743961                                                                             | N-Term(iTRAQ4plex), M22(Oxidation), K26(iTRAQ4plex)                   | 2776.53725 | 47 |      | Expt2 |
| TNNVNFSELPAPR              | 2 | 225543465                                                                            | N-Term(iTRAQ4plex)                                                    | 1587.86138 | 47 | 4.27 | Expt2 |
| GGSGTAGTEPSDIIIPLR         | 2 | 6753726                                                                              | N-Term(iTRAQ4plex)                                                    | 1885.01482 | 47 | 3.60 | Expt2 |
| VNVAGLVLAGSADFK            | 2 | 124286826                                                                            | N-Term(iTRAQ4plex), K15(iTRAQ4plex)                                   | 1749.02597 | 47 |      | Expt2 |



|                             |   |                                                                                              |                                                                    |            |    |      |       |
|-----------------------------|---|----------------------------------------------------------------------------------------------|--------------------------------------------------------------------|------------|----|------|-------|
| VMVOPINLIFR                 | 1 | 27883844                                                                                     | N-Term(iTRAQ4plex), M2(Oxidation)                                  | 1489.87322 | 47 |      | Expt2 |
| VYLAPDGTSAEYGSIPVDINK       | 1 | 226958474                                                                                    | N-Term(iTRAQ4plex), K21(iTRAQ4plex)                                | 2497.30790 | 47 |      | Expt2 |
| QLIMANPQMQLIQIR             | 1 | 22726191;34328236                                                                            | N-Term(iTRAQ4plex)                                                 | 1956.07120 | 47 |      | Expt2 |
| TFCGTFEYLPELVLEDNDYGR       | 1 | 149256990;149263735;149263737;190883484                                                      | N-Term(iTRAQ4plex), C3(Methylthio)                                 | 2579.16318 | 47 |      | Expt2 |
| APEGEETEFYVSPEDLEAQLOSDER   | 4 | 7949027                                                                                      | N-Term(iTRAQ4plex)                                                 | 3012.38211 | 47 | 3.94 | Expt2 |
| CPFTGNVSIR                  | 5 | 21426889;149263120                                                                           | N-Term(iTRAQ4plex), C1(Methylthio)                                 | 1283.63408 | 47 |      | Expt2 |
| GDEGIFEEFIEER               | 1 | 160333832;160333829;160333835                                                                | N-Term(iTRAQ4plex)                                                 | 1800.84453 | 47 |      | Expt2 |
| YGGPPPDVSVYSGQQPSVGTIEIFVGK | 2 | 114145493;29788787                                                                           | N-Term(iTRAQ4plex), K25(iTRAQ4plex)                                | 2854.44944 | 47 | 4.46 | Expt2 |
| TEDSLMPEEEFLR               | 2 | 165932270                                                                                    | N-Term(iTRAQ4plex)                                                 | 1739.82793 | 47 | 3.41 | Expt2 |
| TAGPOSQVLCVGMMDR            | 1 | 156255173;7304861;156255171                                                                  | N-Term(iTRAQ4plex), C10(Methylthio)                                | 1882.88030 | 47 |      | Expt2 |
| ELLIIGVVAAR                 | 2 | 19527256                                                                                     | N-Term(iTRAQ4plex)                                                 | 1255.78801 | 47 |      | Expt2 |
| SITIANOTNCPLYYTK            | 1 | 40254595                                                                                     | N-Term(iTRAQ4plex), C10(Methylthio), K16(iTRAQ4plex)               | 2100.11423 | 47 |      | Expt2 |
| EGIDPAPYYWYDQR              | 1 | 219276601;219275596                                                                          | N-Term(iTRAQ4plex)                                                 | 2017.94328 | 47 |      | Expt2 |
| VLFFDELDSIAK                | 1 | 94408011                                                                                     | N-Term(iTRAQ4plex), K12(iTRAQ4plex)                                | 1684.94585 | 47 |      | Expt2 |
| MLLFTEVTR                   | 1 | 116089273                                                                                    | N-Term(iTRAQ4plex), M1(Oxidation)                                  | 1269.70329 | 47 |      | Expt2 |
| EPGEAAAEGAAEAR              | 2 | 229608928                                                                                    | N-Term(iTRAQ4plex)                                                 | 1601.75187 | 47 | 3.58 | Expt2 |
| TIYLEEVAVNFAK               | 2 | 33859811                                                                                     | N-Term(iTRAQ4plex), K14(iTRAQ4plex)                                | 1914.05014 | 47 | 3.66 | Expt2 |
| GAALITAVGVR                 | 1 | 225735584;225735582                                                                          | N-Term(iTRAQ4plex)                                                 | 1171.72783 | 47 |      | Expt2 |
| SLAMEMVLTDGR                | 2 | 29789289                                                                                     | N-Term(iTRAQ4plex)                                                 | 1466.74883 | 47 | 4.08 | Expt2 |
| EVSFOATGDSEWR               | 1 | 112181167                                                                                    | N-Term(iTRAQ4plex)                                                 | 1655.78044 | 47 |      | Expt2 |
| FSTSQSLPASQTR               | 2 | 31982171                                                                                     | N-Term(iTRAQ4plex)                                                 | 1553.80754 | 47 |      | Expt2 |
| GEGPELDVNMMPK               | 2 | 61743961                                                                                     | N-Term(iTRAQ4plex), K12(iTRAQ4plex)                                | 1573.81609 | 47 | 3.51 | Expt2 |
| EGVVEITGK                   | 2 | 158937312                                                                                    | N-Term(iTRAQ4plex), K9(iTRAQ4plex)                                 | 1219.72270 | 47 | 3.82 | Expt2 |
| EVWYFGLQYVDNK               | 3 | 149266483                                                                                    | N-Term(iTRAQ4plex), K13(iTRAQ4plex)                                | 1949.01047 | 47 | 3.58 | Expt2 |
| IYVSQYPF                    | 1 | 6753824                                                                                      | N-Term(iTRAQ4plex)                                                 | 1160.61089 | 47 |      | Expt2 |
| EFSSQLAGQVNVEMDAAPGVDLTR    | 2 | 226823220                                                                                    | N-Term(iTRAQ4plex), M14(Oxidation)                                 | 2694.32553 | 47 |      | Expt2 |
| EIEIDIEPTDK                 | 2 | 6679034                                                                                      | N-Term(iTRAQ4plex), K11(iTRAQ4plex)                                | 1589.84453 | 46 | 3.43 | Expt2 |
| VNAVNPVTVMTPMGR             | 1 | 146134409                                                                                    | N-Term(iTRAQ4plex)                                                 | 1729.92351 | 46 |      | Expt2 |
| ASONLVVLAR                  | 2 | 227908790                                                                                    | N-Term(iTRAQ4plex)                                                 | 1214.73479 | 46 | 3.62 | Expt2 |
| LPAAGVGMVMATVK              | 1 | 12584986;149255181;149255570;149269218;149272300                                             | N-Term(iTRAQ4plex), M9(Oxidation), M11(Oxidation), K15(iTRAQ4plex) | 1779.96567 | 46 |      | Expt2 |
| EESYDLILSR                  | 2 | 160298217                                                                                    | N-Term(iTRAQ4plex)                                                 | 1368.71318 | 46 | 3.76 | Expt2 |
| GASOAGMLAPGTR               | 1 | 149251847;21312564                                                                           | N-Term(iTRAQ4plex), M7(Oxidation)                                  | 1376.71111 | 46 |      | Expt2 |
| TIVCOESELPELLEYGR           | 1 | 149255522;19526936                                                                           | N-Term(iTRAQ4plex), C4(Methylthio)                                 | 2155.05924 | 46 |      | Expt2 |
| IVEPYIAWGPYNLK              | 2 | 31981515;82957238                                                                            | N-Term(iTRAQ4plex), K14(iTRAQ4plex)                                | 1951.09465 | 46 | 3.76 | Expt2 |
| TMEIELEGLK                  | 3 | 148747546                                                                                    | N-Term(iTRAQ4plex), K10(iTRAQ4plex)                                | 1450.81537 | 46 |      | Expt2 |
| DLNAEALOR                   | 2 | 55926127                                                                                     | N-Term(iTRAQ4plex)                                                 | 1244.67058 | 46 | 3.56 | Expt2 |
| SSTNGFDDGIIWATWK            | 2 | 19527078                                                                                     | N-Term(iTRAQ4plex), N5(Deamidated), K17(iTRAQ4plex)                | 2188.07755 | 46 | 3.76 | Expt2 |
| TEITDLR                     | 2 | 226823220                                                                                    | N-Term(iTRAQ4plex)                                                 | 991.55377  | 46 |      | Expt2 |
| NTEDLTEEWLR                 | 3 | 188528613                                                                                    | N-Term(iTRAQ4plex)                                                 | 1549.76604 | 46 | 3.60 | Expt2 |
| ODMPNAMPVSELTDK             | 2 | 6680722;149254976                                                                            | N-Term(iTRAQ4plex), K15(iTRAQ4plex)                                | 1963.97075 | 46 | 4.10 | Expt2 |
| VLOALEGLK                   | 2 | 149249753;94397093;82996042;12963511;94372784;149253395;38083674                             | N-Term(iTRAQ4plex), K9(iTRAQ4plex)                                 | 1258.80290 | 46 | 3.50 | Expt2 |
| EIFEQPESVNTMR               | 1 | 7305085                                                                                      | N-Term(iTRAQ4plex), M13(Oxidation)                                 | 1838.90935 | 46 |      | Expt2 |
| TVLWPNGLSLDIPAGR            | 1 | 124494256                                                                                    | N-Term(iTRAQ4plex), N6(Deamidated)                                 | 1854.03093 | 46 |      | Expt2 |
| AAQVAALPR                   | 2 | 40807498                                                                                     | N-Term(iTRAQ4plex)                                                 | 1203.69731 | 46 | 3.51 | Expt2 |
| NLQTVNVN DEN                | 2 | 149234297;82895052;82898755;149267404;149233921;149263096;51766996;82998399                  | N-Term(iTRAQ4plex)                                                 | 1289.64787 | 46 |      | Expt2 |
| ETLLDTELASAAAGTSLR          | 4 | 227116320                                                                                    | N-Term(iTRAQ4plex)                                                 | 1963.04898 | 46 | 3.54 | Expt2 |
| EIQTA VR                    | 7 | 68131547;68226433;30061385;149264032;160420312;28316750;28316760;160420308;30089704;30061387 | N-Term(iTRAQ4plex)                                                 | 960.56261  | 46 |      | Expt2 |
| TPPSEEDSAEAE R              | 1 | 21313588                                                                                     | N-Term(iTRAQ4plex)                                                 | 1561.71391 | 46 |      | Expt2 |
| TIGISVDPR                   | 5 | 149251177;149252074;94397192                                                                 | N-Term(iTRAQ4plex)                                                 | 1101.64018 | 46 |      | Expt2 |
| YDILLTAVK                   | 1 | 9789873                                                                                      | N-Term(iTRAQ4plex), K9(iTRAQ4plex)                                 | 1323.82158 | 46 |      | Expt2 |
| VSEIFQVLPE TQEI R           | 5 | 111185907                                                                                    | N-Term(iTRAQ4plex)                                                 | 2061.10307 | 46 | 4.39 | Expt2 |

|                            |   |                                                                                                |                                                                     |            |    |      |       |
|----------------------------|---|------------------------------------------------------------------------------------------------|---------------------------------------------------------------------|------------|----|------|-------|
| DIICQIAYAR                 | 1 | 94362762;149233658;149257749;149250073                                                         | N-Term(iTRAQ4plex), C4(Methylthio)                                  | 1355.69866 | 46 |      | Expt2 |
| YGOJSEVVVK                 | 1 | 6680946                                                                                        | N-Term(iTRAQ4plex), K11(iTRAQ4plex)                                 | 1508.89934 | 46 |      | Expt2 |
| ILLENLGEASSOSPSTQYAOEAAR   | 2 | 122114537                                                                                      | N-Term(iTRAQ4plex)                                                  | 2717.39774 | 46 | 4.00 | Expt2 |
| HFHQLNPEVTQR               | 1 | 13385420                                                                                       | N-Term(iTRAQ4plex), N6(Deamidated), Q11(Deamidated)                 | 1651.83341 | 46 |      | Expt2 |
| CEQSEELDNLIK               | 1 | 70909345                                                                                       | N-Term(iTRAQ4plex), C1(Methylthio), K12(iTRAQ4plex)                 | 1754.85576 | 46 |      | Expt2 |
| LTLLEVCGGTGANFK            | 1 | 125490373;61098178;33563290;67003561                                                           | N-Term(iTRAQ4plex), C8(Methylthio), K15(iTRAQ4plex)                 | 1856.98935 | 46 |      | Expt2 |
| FGLTFTMDR                  | 8 | 6678321                                                                                        | N-Term(iTRAQ4plex), M7(Oxidation)                                   | 1247.62139 | 46 |      | Expt2 |
| LYQVEYAFK                  | 1 | 6755198                                                                                        | N-Term(iTRAQ4plex), K9(iTRAQ4plex)                                  | 1448.80242 | 46 |      | Expt2 |
| YVEPIEDVPCGNIVGLVGVDDQFLVK | 2 | 33859482                                                                                       | N-Term(iTRAQ4plex), C10(Methylthio), K25(iTRAQ4plex)                | 3036.61191 | 46 | 4.13 | Expt2 |
| ISMINNPSOEISDSSTPIFR       | 2 | 236466498                                                                                      | N-Term(iTRAQ4plex)                                                  | 2380.19657 | 46 | 4.41 | Expt2 |
| NALCAPEVLSLNSLR            | 1 | 158533976                                                                                      | N-Term(iTRAQ4plex), C4(Methylthio)                                  | 1789.94638 | 46 |      | Expt2 |
| ILYMMDEINNPVLTVK           | 3 | 34538601;167716840                                                                             | N-Term(iTRAQ4plex), K16(iTRAQ4plex)                                 | 2181.19242 | 46 | 3.72 | Expt2 |
| LLDSITVPVAR                | 1 | 163310776                                                                                      | N-Term(iTRAQ4plex)                                                  | 1327.80669 | 46 |      | Expt2 |
| VAFGEDIDLPETFDAR           | 1 | 6681079                                                                                        | N-Term(iTRAQ4plex)                                                  | 1938.95940 | 46 |      | Expt2 |
| FGYQFTQGGPR                | 4 | 8394460                                                                                        | N-Term(iTRAQ4plex)                                                  | 1472.74333 | 46 | 3.92 | Expt2 |
| LVPALONSTR                 | 3 | 38084778;94405733                                                                              | N-Term(iTRAQ4plex)                                                  | 1355.81194 | 46 |      | Expt2 |
| SVNGLAFYDWENTELIR          | 1 | 29789080                                                                                       | N-Term(iTRAQ4plex), N3(Deamidated)                                  | 2172.07915 | 46 |      | Expt2 |
| ILAFPCNOFGR                | 1 | 90903233;90903235                                                                              | N-Term(iTRAQ4plex), C6(Methylthio)                                  | 1455.73662 | 45 |      | Expt2 |
| VDIDVPDWNVEGPDVK           | 2 | 61743961                                                                                       | N-Term(iTRAQ4plex), M15(Oxidation), K16(iTRAQ4plex)                 | 2046.03843 | 45 | 4.20 | Expt2 |
| AILGSDYDELSTQTEYSTQLTQR    | 1 | 88014564                                                                                       | N-Term(iTRAQ4plex)                                                  | 2648.32505 | 45 |      | Expt2 |
| LNEAAGLNOAATELVQASR        | 1 | 227116327                                                                                      | N-Term(iTRAQ4plex)                                                  | 2171.16190 | 45 |      | Expt2 |
| FLVEYIAPMTEK               | 1 | 6755106                                                                                        | N-Term(iTRAQ4plex), K12(iTRAQ4plex)                                 | 1728.95769 | 45 |      | Expt2 |
| GQVYILGR                   | 6 | 6996911                                                                                        | N-Term(iTRAQ4plex)                                                  | 1049.62480 | 45 | 3.48 | Expt2 |
| VPECLYTLPSLR               | 1 | 11528490                                                                                       | N-Term(iTRAQ4plex), C4(Methylthio)                                  | 1580.83464 | 45 |      | Expt2 |
| NVNTALNTQIPSSIEDIFNDDR     | 1 | 149259286;21450341                                                                             | N-Term(iTRAQ4plex)                                                  | 2721.35337 | 45 |      | Expt2 |
| ISMQDVDSLGSCK              | 1 | 61743961                                                                                       | N-Term(iTRAQ4plex), M3(Oxidation), C13(Methylthio), K14(iTRAQ4plex) | 1845.90158 | 45 |      | Expt2 |
| LQQTQNVDEVVDIMR            | 2 | 6678553                                                                                        | N-Term(iTRAQ4plex), M15(Oxidation)                                  | 2076.05710 | 45 | 3.58 | Expt2 |
| YAAVTQFEATDAR              | 5 | 68226731                                                                                       | N-Term(iTRAQ4plex)                                                  | 1586.79534 | 45 | 4.07 | Expt2 |
| SPLLEIVER                  | 1 | 62990169;149257637                                                                             | N-Term(iTRAQ4plex)                                                  | 1199.71599 | 45 |      | Expt2 |
| QVSSECOGEMLDYR             | 1 | 6677905                                                                                        | N-Term(iTRAQ4plex), C6(Methylthio)                                  | 1834.79106 | 45 |      | Expt2 |
| MVPTGMGASLER               | 1 | 21313308;158186704                                                                             | N-Term(iTRAQ4plex)                                                  | 1392.71147 | 45 |      | Expt2 |
| WOTLLSVDDLVEK              | 1 | 29789239                                                                                       | N-Term(iTRAQ4plex), K13(iTRAQ4plex)                                 | 1834.01694 | 45 |      | Expt2 |
| GLIPLTISLLDK               | 1 | 156938252                                                                                      | N-Term(iTRAQ4plex), K12(iTRAQ4plex)                                 | 1571.00713 | 45 |      | Expt2 |
| LTGADGTPPGFLK              | 2 | 21312994                                                                                       | N-Term(iTRAQ4plex), K14(iTRAQ4plex)                                 | 1674.97673 | 45 |      | Expt2 |
| ITNQVIYLNPIIECR            | 3 | 134288917                                                                                      | N-Term(iTRAQ4plex), C15(Methylthio)                                 | 2092.06865 | 45 | 3.60 | Expt2 |
| EGNGVTMGAEIR               | 4 | 33620739;94363353;149252094;149252164;94383790;149265610;149266035;29789016;33563264;164664497 | N-Term(iTRAQ4plex), N3(Deamidated)                                  | 1378.67510 | 45 |      | Expt2 |
| IIVIMDSYGSDLVER            | 1 | 31560705                                                                                       | N-Term(iTRAQ4plex)                                                  | 1853.98039 | 45 |      | Expt2 |
| AVEFOEAQYADDNSLLFMETSAK    | 1 | 113866024                                                                                      | N-Term(iTRAQ4plex), K24(iTRAQ4plex)                                 | 2966.44498 | 45 |      | Expt2 |
| QEFFEWWYPVDLR              | 1 | 120537241                                                                                      | N-Term(iTRAQ4plex)                                                  | 1772.87517 | 45 |      | Expt2 |
| SLLVLDVPPAPEPTTSISPASR     | 1 | 124486588                                                                                      | N-Term(iTRAQ4plex)                                                  | 2516.38291 | 45 |      | Expt2 |
| ISMPDVDLELK                | 1 | 61743961                                                                                       | N-Term(iTRAQ4plex), M3(Oxidation), K11(iTRAQ4plex)                  | 1563.86138 | 45 |      | Expt2 |
| DISTLEPLK                  | 2 | 18700032;40254600;149253242                                                                    | N-Term(iTRAQ4plex), K9(iTRAQ4plex)                                  | 1303.77800 | 45 |      | Expt2 |
| ETMONLNDR                  | 8 | 149262636;154090941;118130981                                                                  | N-Term(iTRAQ4plex), M3(Oxidation)                                   | 1280.60600 | 45 |      | Expt2 |
| VNLFPEIITLSK               | 2 | 134288917                                                                                      | N-Term(iTRAQ4plex), K12(iTRAQ4plex)                                 | 1662.01792 | 45 |      | Expt2 |
| FPPFFTLQPNVDTR             | 3 | 25092662                                                                                       | N-Term(iTRAQ4plex)                                                  | 1822.96030 | 45 | 3.54 | Expt2 |
| LEAIEDDSGR                 | 1 | 84452155;31560313                                                                              | N-Term(iTRAQ4plex)                                                  | 1248.61797 | 45 |      | Expt2 |
| NPSAMAVESFATAPFVQIGR       | 2 | 21311891                                                                                       | N-Term(iTRAQ4plex)                                                  | 2338.21231 | 45 | 4.33 | Expt2 |
| AALNALOPPEFR               | 1 | 124486867                                                                                      | N-Term(iTRAQ4plex)                                                  | 1470.81780 | 45 |      | Expt2 |
| ILDVNDNIPVVENK             | 1 | 149269903;161016843                                                                            | N-Term(iTRAQ4plex), K14(iTRAQ4plex)                                 | 1870.05960 | 45 |      | Expt2 |
| TPPDVIFVFGFR               | 1 | 46519156;46519160;149267855;149271781;82800155;149267539;82965849                              | N-Term(iTRAQ4plex)                                                  | 1542.84867 | 45 |      | Expt2 |
| GSPLLIGVR                  | 1 | 7305085;7305087                                                                                | N-Term(iTRAQ4plex)                                                  | 1055.66863 | 45 |      | Expt2 |

|                        |   |                                      |                                                                                      |            |    |      |       |
|------------------------|---|--------------------------------------|--------------------------------------------------------------------------------------|------------|----|------|-------|
| SLAYAEEDER             | 2 | 110625833                            | N-Term(iTRAQ4plex)                                                                   | 1455.67522 | 45 | 3.50 | Expt2 |
| LPAPQEDTASEAGTPQGEVQTR | 1 | 213417799;213417812                  | N-Term(iTRAQ4plex)                                                                   | 2426.20017 | 45 |      | Expt2 |
| MSGIDATTALSVGAPDVTLK   | 2 | 61743961                             | N-Term(iTRAQ4plex), M1(Oxidation), K20(iTRAQ4plex)                                   | 2251.21561 | 45 | 3.84 | Expt2 |
| VNSVNPVTLTDMGK         | 1 | 6671688                              | N-Term(iTRAQ4plex), M13(Oxidation), K15(iTRAQ4plex)                                  | 1878.03257 | 45 |      | Expt2 |
| AATMSAVEAATCR          | 2 | 119508439                            | N-Term(iTRAQ4plex), C12(Methylthio)                                                  | 1471.68364 | 44 | 3.68 | Expt2 |
| DLEDSLAR               | 2 | 9506843;162287370;161760667          | N-Term(iTRAQ4plex)                                                                   | 1062.55791 | 44 |      | Expt2 |
| SLEEALR                | 1 | 13385466                             | N-Term(iTRAQ4plex)                                                                   | 961.54370  | 44 |      | Expt2 |
| GSTASQVLQR             | 2 | 149258501;19526818                   | N-Term(iTRAQ4plex)                                                                   | 1190.66387 | 44 | 3.91 | Expt2 |
| FDGILTEGEGPR           | 1 | 7657067                              | N-Term(iTRAQ4plex)                                                                   | 1434.73393 | 44 |      | Expt2 |
| AGATVYITGR             | 1 | 31980844                             | N-Term(iTRAQ4plex)                                                                   | 1152.64897 | 44 |      | Expt2 |
| IQENVPVGTGR            | 8 | 7305007                              | N-Term(iTRAQ4plex)                                                                   | 1256.70964 | 44 | 3.59 | Expt2 |
| GEGOLSAER              | 1 | 33859482                             | N-Term(iTRAQ4plex)                                                                   | 1161.60320 | 44 |      | Expt2 |
| ANWYFLAR               | 1 | 6680618                              | N-Term(iTRAQ4plex)                                                                   | 1297.72344 | 44 |      | Expt2 |
| ILPTLEAVALGNK          | 1 | 13385872                             | N-Term(iTRAQ4plex), K14(iTRAQ4plex)                                                  | 1698.04923 | 44 |      | Expt2 |
| DFPNLAFIR              | 2 | 229608920                            | N-Term(iTRAQ4plex)                                                                   | 1236.68425 | 44 |      | Expt2 |
| QIYPPINVLPSLSR         | 2 | 19705578                             | N-Term(iTRAQ4plex)                                                                   | 1741.01592 | 44 |      | Expt2 |
| TLMLVK                 | 2 | 6754090                              | N-Term(iTRAQ4plex), K6(iTRAQ4plex)                                                   | 992.63585  | 44 |      | Expt2 |
| MYDSMALALPODLOAAR      | 1 | 6753440                              | N-Term(iTRAQ4plex), M1(Oxidation), M5(Oxidation)                                     | 1998.97661 | 44 |      | Expt2 |
| SDVPMITAEAFNR          | 1 | 14196340                             | N-Term(iTRAQ4plex)                                                                   | 1509.74675 | 44 |      | Expt2 |
| IEGDETSTEAATR          | 1 | 21704118;94392649                    | N-Term(iTRAQ4plex)                                                                   | 1523.73601 | 44 |      | Expt2 |
| EASDIITDDNFTSIVK       | 2 | 62234487;54261793;56699478;269784615 | N-Term(iTRAQ4plex), K17(iTRAQ4plex)                                                  | 2169.15763 | 44 | 4.38 | Expt2 |
| IYIDSNWPER             | 4 | 51491845                             | N-Term(iTRAQ4plex), N6(Deamidated)                                                   | 1479.72087 | 44 | 3.55 | Expt2 |
| FOILEGPPESMGR          | 1 | 33859560                             | N-Term(iTRAQ4plex), M11(Oxidation)                                                   | 1620.82029 | 44 |      | Expt2 |
| LSPGAYPTVIOQQTAPSQR    | 2 | 81295418;209862955                   | N-Term(iTRAQ4plex)                                                                   | 2186.16849 | 44 | 3.55 | Expt2 |
| DAQELLR                | 2 | 112421039                            | N-Term(iTRAQ4plex)                                                                   | 988.55687  | 44 |      | Expt2 |
| EDYDSVEQDGEPEGPQR      | 2 | 162287296;162287294                  | N-Term(iTRAQ4plex)                                                                   | 2079.89043 | 44 | 4.07 | Expt2 |
| TPVGFICLGNMGNPMAK      | 2 | 21704140                             | N-Term(iTRAQ4plex), K17(iTRAQ4plex)                                                  | 1992.07083 | 44 | 4.34 | Expt2 |
| GGGQIIPART             | 1 | 33859482;6755594;158508674           | N-Term(iTRAQ4plex)                                                                   | 1113.65154 | 44 |      | Expt2 |
| LFQEPMLK               | 2 | 6753558                              | N-Term(iTRAQ4plex), K9(iTRAQ4plex)                                                   | 1406.83464 | 44 | 3.58 | Expt2 |
| VLLMELEAR              | 1 | 149243283                            | N-Term(iTRAQ4plex)                                                                   | 1346.74700 | 44 |      | Expt2 |
| VFANAYLSDLGCCIK        | 2 | 85861182                             | N-Term(iTRAQ4plex), C13(Methylthio), K15(iTRAQ4plex)                                 | 1904.98825 | 44 | 4.32 | Expt2 |
| ALLOELQR               | 2 | 227330621                            | N-Term(iTRAQ4plex), Q4(Deamidated), Q7(Deamidated)                                   | 1116.64006 | 44 |      | Expt2 |
| QMLFDLESAYAFNR         | 1 | 13385320                             | N-Term(iTRAQ4plex)                                                                   | 1962.95285 | 44 |      | Expt2 |
| ANPYECGFDPPTSSAR       | 1 | 34538605;226453482;187373161         | N-Term(iTRAQ4plex), C6(Methylthio)                                                   | 1804.77703 | 44 |      | Expt2 |
| YPDQWIVPGGMEPEEPPGGAAR | 2 | 149261475;169808397                  | N-Term(iTRAQ4plex), M12(Oxidation)                                                   | 2701.27713 | 44 | 3.53 | Expt2 |
| MDDPTVWWSNER           | 1 | 194018529;194018533                  | N-Term(iTRAQ4plex)                                                                   | 1607.72368 | 44 |      | Expt2 |
| DFLLQOTMLR             | 3 | 165932331                            | N-Term(iTRAQ4plex), M8(Oxidation)                                                    | 1424.77178 | 44 |      | Expt2 |
| DEELSCSVLELK           | 1 | 160333710;148747546                  | N-Term(iTRAQ4plex), C6(Methylthio), K12(iTRAQ4plex)                                  | 1698.86479 | 44 |      | Expt2 |
| VGDVYIPR               | 2 | 6755478                              | N-Term(iTRAQ4plex)                                                                   | 1062.60918 | 44 |      | Expt2 |
| SDGLMFFQOVPMVEIDGMK    | 1 | 31981724                             | N-Term(iTRAQ4plex), M6(Oxidation), M18(Oxidation), K19(iTRAQ4plex)                   | 2432.19248 | 44 |      | Expt2 |
| TTAQVILIR              | 2 | 160707894                            | N-Term(iTRAQ4plex)                                                                   | 1045.64946 | 44 |      | Expt2 |
| GYILOEDGR              | 2 | 118197277                            | N-Term(iTRAQ4plex)                                                                   | 1194.62529 | 44 |      | Expt2 |
| VMALSLVGADPEQLR        | 2 | 115647999                            | N-Term(iTRAQ4plex), M2(Oxidation)                                                    | 1758.95586 | 44 |      | Expt2 |
| YADESGNMFDFNFISCLVR    | 1 | 110227381                            | N-Term(iTRAQ4plex), M8(Oxidation), C16(Methylthio)                                   | 2402.02896 | 44 |      | Expt2 |
| VTYTPMAPGSYLISIK       | 1 | 125347376                            | N-Term(iTRAQ4plex), K16(iTRAQ4plex)                                                  | 2029.13396 | 44 |      | Expt2 |
| AVVIVDDR               | 3 | 149252953;23956214                   | N-Term(iTRAQ4plex)                                                                   | 1030.60137 | 44 |      | Expt2 |
| IAQITGPPDR             | 1 | 84662730                             | N-Term(iTRAQ4plex)                                                                   | 1211.68474 | 44 |      | Expt2 |
| ELTPQVISAAR            | 2 | 31543942                             | N-Term(iTRAQ4plex)                                                                   | 1328.76433 | 44 |      | Expt2 |
| ICILEPTEGNDMSPEAYK     | 2 | 111185907                            | N-Term(iTRAQ4plex), C2(Methylthio), M12(Oxidation), K19(iTRAQ4plex)                  | 2523.17685 | 44 |      | Expt2 |
| DINECETPGICMNGR        | 2 | 118197277                            | N-Term(iTRAQ4plex), C5(Methylthio), C11(Methylthio), M12(Oxidation), N13(Deamidated) | 1904.74344 | 44 | 3.83 | Expt2 |
| ASQASQEQY              | 3 | 7106331                              | N-Term(iTRAQ4plex)                                                                   | 1027.48247 | 44 |      | Expt2 |
| AMLSGPGQFAENETNEVNFNR  | 2 | 149249090;82923135                   | N-Term(iTRAQ4plex), M2(Oxidation)                                                    | 2371.11563 | 44 | 4.34 | Expt2 |
| SERVAMLEEEELR          | 1 | 153792526                            | N-Term(iTRAQ4plex), M6(Oxidation)                                                    | 1707.86431 | 44 |      | Expt2 |
| WIVPGGMEPEEPPSVAAR     | 1 | 149269103;9789933                    | N-Term(iTRAQ4plex), M8(Oxidation)                                                    | 2270.13022 | 44 |      | Expt2 |

|                              |   |                                                                                     |                                                      |            |    |      |       |
|------------------------------|---|-------------------------------------------------------------------------------------|------------------------------------------------------|------------|----|------|-------|
| YSPEEIAMATVTLAR              | 1 | 60687506                                                                            | N-Term(iTRAQ4plex), M8(Oxidation)                    | 1811.93863 | 44 |      | Expt2 |
| INFDDNAEFR                   | 2 | 165972309                                                                           | N-Term(iTRAQ4plex)                                   | 1384.66362 | 44 | 3.83 | Expt2 |
| SQLEGLEESVR                  | 1 | 226958474                                                                           | N-Term(iTRAQ4plex)                                   | 1390.72917 | 43 |      | Expt2 |
| EANNFLWPFK                   | 1 | 31981515;82957238                                                                   | N-Term(iTRAQ4plex), K10(iTRAQ4plex)                  | 1553.83879 | 43 |      | Expt2 |
| GPTEQLVSPPEVVEIVR            | 2 | 149269514;226958354;226958356;33859600;226958358                                    | N-Term(iTRAQ4plex)                                   | 2186.15366 | 43 | 4.41 | Expt2 |
| DLTGQVNLNR                   | 4 | 115496850                                                                           | N-Term(iTRAQ4plex)                                   | 1159.65935 | 43 |      | Expt2 |
| SLOSVAEER                    | 3 | 13385036;149233830;82896911;149262861;149266587;149267527;82984224                  | N-Term(iTRAQ4plex)                                   | 1162.62334 | 43 |      | Expt2 |
| VTIGLLSDDPOR                 | 1 | 226531047;226531069                                                                 | N-Term(iTRAQ4plex)                                   | 1570.89385 | 43 |      | Expt2 |
| VIVVITDGR                    | 5 | 226423922                                                                           | N-Term(iTRAQ4plex)                                   | 1115.68950 | 43 |      | Expt2 |
| GGANVIVTER                   | 5 | 169234958                                                                           | N-Term(iTRAQ4plex)                                   | 1159.65837 | 43 | 3.56 | Expt2 |
| LSDDELGR                     | 1 | 30409956                                                                            | N-Term(iTRAQ4plex)                                   | 1046.59990 | 43 |      | Expt2 |
| QINWTVLYR                    | 3 | 18250296;94386657;94381396                                                          | N-Term(iTRAQ4plex)                                   | 1336.75163 | 43 | 3.45 | Expt2 |
| QGFDLNIPGGEIDTSLK            | 2 | 61743961                                                                            | N-Term(iTRAQ4plex), K17(iTRAQ4plex)                  | 2092.12314 | 43 | 3.75 | Expt2 |
| ESYSVYVYK                    | 1 | 68131547;68226433;30061385;149264032;160420312;28316760;160420308;30089704;30061387 | N-Term(iTRAQ4plex), K9(iTRAQ4plex)                   | 1425.76079 | 43 |      | Expt2 |
| EIVYLPCIYR                   | 3 | 149251616;9507079                                                                   | N-Term(iTRAQ4plex), C8(Methylthio)                   | 1587.81340 | 43 | 3.62 | Expt2 |
| VLTPELYAELR                  | 3 | 10946574                                                                            | N-Term(iTRAQ4plex)                                   | 1447.82964 | 43 | 3.49 | Expt2 |
| SINDMSSLSLSELTVR             | 1 | 88853584                                                                            | N-Term(iTRAQ4plex)                                   | 1826.91227 | 43 |      | Expt2 |
| YMWLVPSQLYTETPEK             | 1 | 149255293;149255746;153945747;31982171                                              | N-Term(iTRAQ4plex), K16(iTRAQ4plex)                  | 2186.17069 | 43 |      | Expt2 |
| FYEQMNGPVTSGSR               | 2 | 56699438;54287684                                                                   | N-Term(iTRAQ4plex), M5(Oxidation), N6(Deamidated)    | 1733.79473 | 43 |      | Expt2 |
| AVIDAETSLLR                  | 1 | 145207948                                                                           | N-Term(iTRAQ4plex)                                   | 1376.75090 | 43 |      | Expt2 |
| ATEVPLSWESFNK                | 2 | 226246550;226246552                                                                 | N-Term(iTRAQ4plex), K13(iTRAQ4plex)                  | 1795.94583 | 43 | 3.62 | Expt2 |
| QOMLENQMEVR                  | 2 | 117938332;117938334                                                                 | N-Term(iTRAQ4plex)                                   | 1549.76018 | 43 | 3.49 | Expt2 |
| GYMDLMPFINK                  | 3 | 31543902                                                                            | N-Term(iTRAQ4plex), K11(iTRAQ4plex)                  | 1616.85198 | 43 | 3.42 | Expt2 |
| GSTGPAGIR                    | 7 | 111120329                                                                           | N-Term(iTRAQ4plex)                                   | 959.54064  | 43 | 3.41 | Expt2 |
| TAVDSLVAYSVK                 | 1 | 62526118                                                                            | N-Term(iTRAQ4plex), K12(iTRAQ4plex)                  | 1540.89109 | 43 |      | Expt2 |
| GDSGGPLVIR                   | 1 | 84794609                                                                            | N-Term(iTRAQ4plex)                                   | 1114.63408 | 43 |      | Expt2 |
| VIVDALDER                    | 2 | 160333881                                                                           | N-Term(iTRAQ4plex)                                   | 1173.66289 | 43 |      | Expt2 |
| DIVPVDASVEVK                 | 1 | 6754982                                                                             | N-Term(iTRAQ4plex), K12(iTRAQ4plex)                  | 1622.88506 | 43 |      | Expt2 |
| LPLTEAELALIAITPPEDSDMASLQQOR | 1 | 13385312                                                                            | N-Term(iTRAQ4plex), M20(Oxidation)                   | 3097.58999 | 43 |      | Expt2 |
| LEVQAEER                     | 1 | 112420990                                                                           | N-Term(iTRAQ4plex)                                   | 1246.64311 | 43 |      | Expt2 |
| MTDSFTEAQADQVTADV GK         | 1 | 21312520                                                                            | N-Term(iTRAQ4plex), M1(Oxidation), K18(iTRAQ4plex)   | 2247.07376 | 43 |      | Expt2 |
| TSVETALR                     | 1 | 6671672                                                                             | N-Term(iTRAQ4plex)                                   | 1020.58464 | 43 |      | Expt2 |
| AOEVSDEGADQEEAYLR            | 2 | 85677504                                                                            | N-Term(iTRAQ4plex)                                   | 2427.05376 | 43 |      | Expt2 |
| SIAFPSIGSGR                  | 1 | 41152517                                                                            | N-Term(iTRAQ4plex)                                   | 1235.68816 | 43 |      | Expt2 |
| LYSFTVOENSR                  | 3 | 7305007                                                                             | N-Term(iTRAQ4plex)                                   | 1487.76348 | 43 | 3.61 | Expt2 |
| QAGPASVPLR                   | 1 | 112293264                                                                           | N-Term(iTRAQ4plex)                                   | 1139.66704 | 43 |      | Expt2 |
| SINDNIAIFTDVQK               | 1 | 62526118                                                                            | N-Term(iTRAQ4plex), K14(iTRAQ4plex)                  | 1866.02414 | 43 |      | Expt2 |
| LLLAIMESR                    | 4 | 61102728;146198792;60592758;60593032                                                | N-Term(iTRAQ4plex)                                   | 1189.71196 | 43 |      | Expt2 |
| LDLIAQQMPEVR                 | 2 | 45504359                                                                            | N-Term(iTRAQ4plex), M8(Oxidation), M9(Oxidation)     | 1719.89444 | 43 | 3.41 | Expt2 |
| TDLEELNLGPR                  | 1 | 124487362                                                                           | N-Term(iTRAQ4plex)                                   | 1400.75322 | 43 |      | Expt2 |
| ALTELMNWSSEK                 | 2 | 13385466                                                                            | N-Term(iTRAQ4plex), K13(iTRAQ4plex)                  | 1765.94529 | 43 | 3.92 | Expt2 |
| NMYEEINETR                   | 1 | 188219589                                                                           | N-Term(iTRAQ4plex)                                   | 1571.71745 | 43 |      | Expt2 |
| GIVNGAAPLPPVPTGGPMAGAR       | 1 | 19705578                                                                            | N-Term(iTRAQ4plex), N4(Deamidated)                   | 2177.15403 | 43 |      | Expt2 |
| ELDALDANDELPLGR              | 2 | 150456419                                                                           | N-Term(iTRAQ4plex), N8(Deamidated)                   | 1886.96665 | 43 | 3.85 | Expt2 |
| WDDPPYDIAR                   | 1 | 225543424;225543420                                                                 | N-Term(iTRAQ4plex)                                   | 1457.68157 | 43 |      | Expt2 |
| TIEEVVGR                     | 6 | 6753036                                                                             | N-Term(iTRAQ4plex)                                   | 1046.59868 | 43 |      | Expt2 |
| QVSDLISVLR                   | 2 | 83816893                                                                            | N-Term(iTRAQ4plex)                                   | 1273.76372 | 43 |      | Expt2 |
| QATLGAGLPISTPCTTVNK          | 2 | 21450129                                                                            | N-Term(iTRAQ4plex), C14(Methylthio), K19(iTRAQ4plex) | 2206.18375 | 43 | 3.50 | Expt2 |
| ASVVPVLAGR                   | 1 | 6681255                                                                             | N-Term(iTRAQ4plex)                                   | 1070.64543 | 43 |      | Expt2 |
| ASVYEDPEYAVTQLAQTTMR         | 2 | 12963591                                                                            | N-Term(iTRAQ4plex)                                   | 2474.21390 | 43 | 4.07 | Expt2 |
| YFVSAEQVQGMK                 | 2 | 13384700                                                                            | N-Term(iTRAQ4plex), K14(iTRAQ4plex)                  | 1937.01249 | 43 | 3.64 | Expt2 |
| NLOEILIGAVR                  | 3 | 46560582;6681283                                                                    | N-Term(iTRAQ4plex)                                   | 1369.83318 | 43 | 3.89 | Expt2 |

|                             |   |                                                                    |                                                      |            |    |      |       |
|-----------------------------|---|--------------------------------------------------------------------|------------------------------------------------------|------------|----|------|-------|
| GEVGPAGPNGFAGPAGAAGQPGAK    | 4 | 111120329                                                          | N-Term(iTRAQ4plex), K24(iTRAQ4plex)                  | 2323.18174 | 42 | 3.55 | Expt2 |
| IAPLAEGALPNLAELOR           | 3 | 27369581                                                           | N-Term(iTRAQ4plex)                                   | 2083.17112 | 42 | 3.70 | Expt2 |
| TGLPISTYFSAVK               | 2 | 6680139;46909579;49355801;6754000                                  | N-Term(iTRAQ4plex), K13(iTRAQ4plex)                  | 1671.95926 | 42 |      | Expt2 |
| AVLDDVAETGTEAAAATGVK        | 1 | 124517726;130503301;149263620                                      | N-Term(iTRAQ4plex), K19(iTRAQ4plex)                  | 2062.13596 | 42 |      | Expt2 |
| AILLDNDGDR                  | 3 | 9789913                                                            | N-Term(iTRAQ4plex)                                   | 1358.74175 | 42 | 3.45 | Expt2 |
| FAFQAEVNR                   | 3 | 6755863                                                            | N-Term(iTRAQ4plex)                                   | 1225.64751 | 42 |      | Expt2 |
| NPTIVNFPITNVDLR             | 1 | 20070404                                                           | N-Term(iTRAQ4plex)                                   | 1857.03623 | 42 |      | Expt2 |
| GFTVMNENER                  | 2 | 6753552                                                            | N-Term(iTRAQ4plex)                                   | 1340.63689 | 42 | 3.89 | Expt2 |
| DINOEYVNFATAGAK             | 1 | 18079339                                                           | N-Term(iTRAQ4plex), K16(iTRAQ4plex)                  | 2042.08792 | 42 |      | Expt2 |
| NGGQILIADLR                 | 1 | 29150272                                                           | N-Term(iTRAQ4plex), N1(Deamidated)                   | 1314.75542 | 42 |      | Expt2 |
| DLEAISAR                    | 1 | 55926127                                                           | N-Term(iTRAQ4plex)                                   | 1018.56676 | 42 |      | Expt2 |
| LSGVSVSSDAFFPFR             | 1 | 149234067                                                          | N-Term(iTRAQ4plex)                                   | 1759.92119 | 42 |      | Expt2 |
| VOEOELTR                    | 1 | 82950147;149264086                                                 | N-Term(iTRAQ4plex)                                   | 1146.62566 | 42 |      | Expt2 |
| TLINILTR                    | 3 | 149254235;160707925                                                | N-Term(iTRAQ4plex)                                   | 1216.74150 | 42 | 3.40 | Expt2 |
| FTEVNAINR                   | 2 | 112421039                                                          | N-Term(iTRAQ4plex)                                   | 1207.65544 | 42 |      | Expt2 |
| TOFPTLDIEVDGGVGPDTVOK       | 1 | 27532955                                                           | N-Term(iTRAQ4plex), K21(iTRAQ4plex)                  | 2504.31900 | 42 |      | Expt2 |
| ALAEALAA                    | 3 | 28916693                                                           | N-Term(iTRAQ4plex)                                   | 802.48290  | 42 |      | Expt2 |
| CPTGYLINEDTR                | 2 | 118197277                                                          | N-Term(iTRAQ4plex), C1(Methylthio)                   | 1621.70635 | 42 |      | Expt2 |
| SLNNQFASFIDK                | 1 | 145580629                                                          | N-Term(iTRAQ4plex), K12(iTRAQ4plex)                  | 1671.89495 | 42 |      | Expt2 |
| AVQGGAAAPVVGAVQVPGMPMPMQAPR | 1 | 149263421;114052541                                                | N-Term(iTRAQ4plex), M20(Oxidation)                   | 2810.50302 | 42 |      | Expt2 |
| IVTSEEVIIR                  | 1 | 153945724                                                          | N-Term(iTRAQ4plex)                                   | 1302.77861 | 42 |      | Expt2 |
| IOFNESFAEMNR                | 1 | 6753498                                                            | N-Term(iTRAQ4plex), M10(Oxidation)                   | 1645.78057 | 42 |      | Expt2 |
| CAGNEDHILTR                 | 2 | 149270621;149270623;7242171                                        | N-Term(iTRAQ4plex), C1(Methylthio)                   | 1394.68804 | 42 | 3.82 | Expt2 |
| EEIFPVQOIMK                 | 3 | 7106242;85861182                                                   | N-Term(iTRAQ4plex), M11(Oxidation), K12(iTRAQ4plex)  | 1722.94223 | 42 | 3.88 | Expt2 |
| ODFESTDTSIEDIESLIPK         | 1 | 31657132                                                           | N-Term(iTRAQ4plex), K18(iTRAQ4plex)                  | 2342.15531 | 42 |      | Expt2 |
| DVIFLK                      | 2 | 70778976;20902547;226246531                                        | N-Term(iTRAQ4plex), K6(iTRAQ4plex)                   | 1022.65911 | 42 |      | Expt2 |
| TDLTAVPASR                  | 1 | 9789985                                                            | N-Term(iTRAQ4plex)                                   | 1174.65654 | 42 |      | Expt2 |
| TVSEEAASYLDQISR             | 2 | 6755214                                                            | N-Term(iTRAQ4plex)                                   | 1812.91472 | 42 | 4.13 | Expt2 |
| GCEIPVDVNVSGR               | 1 | 124487315                                                          | N-Term(iTRAQ4plex), C2(Methylthio)                   | 1534.74443 | 42 |      | Expt2 |
| ELYIEEALQNER                | 2 | 158854020;158854022                                                | N-Term(iTRAQ4plex)                                   | 1650.84831 | 42 | 3.86 | Expt2 |
| GIAFEDVR                    | 2 | 6680618                                                            | N-Term(iTRAQ4plex)                                   | 1050.57109 | 42 |      | Expt2 |
| DVDEIEAWISEK                | 1 | 115496850                                                          | N-Term(iTRAQ4plex), K12(iTRAQ4plex)                  | 1721.88396 | 42 |      | Expt2 |
| IIPLLTDPK                   | 1 | 6753762                                                            | N-Term(iTRAQ4plex), K9(iTRAQ4plex)                   | 1297.83367 | 42 |      | Expt2 |
| DAFADAVQR                   | 1 | 163954948                                                          | N-Term(iTRAQ4plex)                                   | 1136.58537 | 42 |      | Expt2 |
| LVDESPENLTFYSENVDR          | 2 | 27151739                                                           | N-Term(iTRAQ4plex)                                   | 2271.09629 | 42 | 3.59 | Expt2 |
| YTTSASSSR                   | 1 | 113195684                                                          | N-Term(iTRAQ4plex)                                   | 1103.54985 | 42 |      | Expt2 |
| MGOAVPAPAGAPGGQPDYSAAWAEYYR | 1 | 84662730                                                           | N-Term(iTRAQ4plex), M1(Oxidation)                    | 3038.42337 | 42 |      | Expt2 |
| AFILGLFGDR                  | 1 | 13384758                                                           | N-Term(iTRAQ4plex)                                   | 1196.65691 | 42 |      | Expt2 |
| VOVECSR                     | 1 | 111074529                                                          | N-Term(iTRAQ4plex), C5(Methylthio)                   | 1010.48918 | 42 |      | Expt2 |
| LATNAAVTLR                  | 3 | 126723461                                                          | N-Term(iTRAQ4plex)                                   | 1272.78020 | 42 | 3.70 | Expt2 |
| TIQVSDFVR                   | 1 | 172072617                                                          | N-Term(iTRAQ4plex)                                   | 1208.67461 | 42 |      | Expt2 |
| IMVANIEEVLQR                | 1 | 6755448                                                            | N-Term(iTRAQ4plex), M2(Oxidation)                    | 1574.87383 | 42 |      | Expt2 |
| DIPVNPCLCYR                 | 1 | 18252782                                                           | N-Term(iTRAQ4plex), C8(Methylthio)                   | 1492.78301 | 42 |      | Expt2 |
| AIDIYEQVGTSAKMSPLLK         | 1 | 13385392                                                           | N-Term(iTRAQ4plex), M13(Oxidation), K19(iTRAQ4plex)  | 2355.23435 | 42 |      | Expt2 |
| HIGNTENLVR                  | 1 | 149258641;149258643;54292132                                       | N-Term(iTRAQ4plex)                                   | 1272.73870 | 42 |      | Expt2 |
| TPAPSPQTSLPNPITYLTK         | 3 | 58037109                                                           | N-Term(iTRAQ4plex), K19(iTRAQ4plex)                  | 2314.29489 | 42 | 4.30 | Expt2 |
| LVFGLLNGR                   | 1 | 149265958;183074535;7305395                                        | N-Term(iTRAQ4plex), N7(Deamidated)                   | 1133.68389 | 42 |      | Expt2 |
| VDIMENQIMDFR                | 2 | 6754086                                                            | N-Term(iTRAQ4plex)                                   | 1654.80583 | 42 | 3.62 | Expt2 |
| EELSNVLAAMR                 | 1 | 149262233;149249185;149255394;82922589;94385943;51827816;149262863 | N-Term(iTRAQ4plex), M10(Oxidation)                   | 1392.72685 | 42 |      | Expt2 |
| WNPNNWVFGGGTAK              | 5 | 33469047                                                           | N-Term(iTRAQ4plex), K15(iTRAQ4plex)                  | 1935.01114 | 42 | 4.61 | Expt2 |
| LQEEMLQR                    | 1 | 31982755                                                           | N-Term(iTRAQ4plex)                                   | 1190.63616 | 42 |      | Expt2 |
| VPPTVTNAVSWR                | 1 | 160333502;160333508                                                | N-Term(iTRAQ4plex)                                   | 1470.82097 | 42 |      | Expt2 |
| VPNAMSVDNDELSVTACGK         | 1 | 31982171                                                           | N-Term(iTRAQ4plex), C17(Methylthio), K19(iTRAQ4plex) | 2268.12705 | 42 |      | Expt2 |
| FLEESVSMSPER                | 1 | 15809026;139948802                                                 | N-Term(iTRAQ4plex), M8(Oxidation)                    | 1699.80144 | 42 |      | Expt2 |

|                          |   |                                                        |                                                                     |            |    |           |       |
|--------------------------|---|--------------------------------------------------------|---------------------------------------------------------------------|------------|----|-----------|-------|
| EQLDMAGAR                | 1 | 118601017                                              | N-Term(iTRAQ4plex), Q2(Deamidated)                                  | 1135.55351 | 42 |           | Expt2 |
| IMLPWDPGSK               | 1 | 6755372                                                | N-Term(iTRAQ4plex), K10(iTRAQ4plex)                                 | 1431.78948 | 42 |           | Expt2 |
| AGTQELDDQIQANLPDEK       | 1 | 160333229                                              | N-Term(iTRAQ4plex), K18(iTRAQ4plex)                                 | 2273.16043 | 42 |           | Expt2 |
| VYSTSVTGSR               | 3 | 18017602                                               | N-Term(iTRAQ4plex)                                                  | 1200.63774 | 42 |           | Expt2 |
| FNADEFEDMVAEK            | 1 | 149249582;149249685;149259021                          | N-Term(iTRAQ4plex), M9(Oxidation), K13(iTRAQ4plex)                  | 1848.86002 | 42 |           | Expt2 |
| DMILPEMVGSMVGVYNGK       | 3 | 6677799;94377390                                       | N-Term(iTRAQ4plex), M8(Oxidation), N17(Deamidated), K19(iTRAQ4plex) | 2358.20414 | 42 | 3.92      | Expt2 |
| YLSPVSAEAGQGGTIAPMTGTIEK | 1 | 149251008;186700620                                    | N-Term(iTRAQ4plex), M18(Oxidation), K24(iTRAQ4plex)                 | 2682.39823 | 42 |           | Expt2 |
| LMSINYLGSVPSR            | 1 | 110625780                                              | N-Term(iTRAQ4plex)                                                  | 1743.92473 | 42 |           | Expt2 |
| TDVTOQLSTFLQDK           | 1 | 110347473                                              | N-Term(iTRAQ4plex), K14(iTRAQ4plex)                                 | 1912.03122 | 42 |           | Expt2 |
| VAQSLCGEDLIHK            | 1 | 21704096;56682931;56682933;56682935;56682929           | N-Term(iTRAQ4plex), C6(Methylthio), K13(iTRAQ4plex)                 | 1722.93821 | 41 |           | Expt2 |
| LDGLVDPTPTGYIESLPK       | 2 | 7657357;226443026                                      | N-Term(iTRAQ4plex), K17(iTRAQ4plex)                                 | 2106.16019 | 41 | 3.41      | Expt2 |
| CNEIHSWLDK               | 1 | 31981690;83024101                                      | N-Term(iTRAQ4plex), C1(Methylthio), K10(iTRAQ4plex)                 | 1554.78897 | 41 |           | Expt2 |
| TCAELVQEAAR              | 1 | 6754856                                                | N-Term(iTRAQ4plex), C2(Methylthio)                                  | 1380.67266 | 41 |           | Expt2 |
| ILANGEIVQDDDDR           | 1 | 21312460                                               | N-Term(iTRAQ4plex), N4(Deamidated)                                  | 1699.86821 | 41 |           | Expt2 |
| VELSTGMPR                | 1 | 22122585                                               | N-Term(iTRAQ4plex)                                                  | 1133.61467 | 41 |           | Expt2 |
| CFQDAYVLLSEK             | 2 | 183396771;51766670                                     | N-Term(iTRAQ4plex), C1(Methylthio), K13(iTRAQ4plex)                 | 1878.92191 | 41 | 3.41      | Expt2 |
| EVDEQMLNVQNK             | 2 | 33859488;7106439;22165384;21746161;149253488;149253527 | N-Term(iTRAQ4plex), K12(iTRAQ4plex)                                 | 1734.89884 | 41 | 4.12      | Expt2 |
| GSVLFSLR                 | 1 | 158937304                                              | N-Term(iTRAQ4plex)                                                  | 1022.61296 | 41 |           | Expt2 |
| VLNTNIDGR                | 2 | 6755368;149259085;149263957;149264584;149264635        | N-Term(iTRAQ4plex)                                                  | 1145.64141 | 41 | 3.51      | Expt2 |
| GVPLSGDOETPELLPR         | 4 | 42544000;289191399                                     | N-Term(iTRAQ4plex)                                                  | 1965.07761 | 41 | 4.58      | Expt2 |
| VVLPFTILER               | 1 | 198278437;198278441;198278439                          | N-Term(iTRAQ4plex)                                                  | 1330.82414 | 41 |           | Expt2 |
| VPTTLAEYCIK              | 1 | 13385778                                               | N-Term(iTRAQ4plex), C9(Methylthio), K11(iTRAQ4plex)                 | 1571.84502 | 41 |           | Expt2 |
| MLTPPMGTVMVDLK           | 3 | 6678321                                                | N-Term(iTRAQ4plex), M1(Oxidation), K14(iTRAQ4plex)                  | 1836.99204 | 41 | 4.34      | Expt2 |
| NTFTESAGSR               | 1 | 111074529                                              | N-Term(iTRAQ4plex)                                                  | 1213.59380 | 41 |           | Expt2 |
| LGLSVENNER               | 2 | 149258001;22203755                                     | N-Term(iTRAQ4plex)                                                  | 1274.68413 | 41 | 3.53      | Expt2 |
| LIGEYGLR                 | 1 | 33504483                                               | N-Term(iTRAQ4plex)                                                  | 1064.62073 | 41 |           | Expt2 |
| GEQSIWLR                 | 3 | 33469047                                               | N-Term(iTRAQ4plex)                                                  | 1219.65691 | 41 |           | Expt2 |
| NLNEQGLR                 | 7 | 22203747                                               | N-Term(iTRAQ4plex), N3(Deamidated)                                  | 1088.58330 | 41 |           | Expt2 |
| LSESVLPPCFVR             | 1 | 154146209                                              | N-Term(iTRAQ4plex), C10(Methylthio)                                 | 1623.83953 | 41 |           | Expt2 |
| EMTEALPGTIR              | 2 | 239052674                                              | N-Term(iTRAQ4plex)                                                  | 1418.74285 | 41 | 3.64      | Expt2 |
| YLLASNAPGR               | 1 | 115647999                                              | N-Term(iTRAQ4plex)                                                  | 1205.67363 | 41 |           | Expt2 |
| LEAAETLEECALR            | 2 | 13386370                                               | N-Term(iTRAQ4plex), C10(Methylthio)                                 | 1637.80193 | 41 | 3.45      | Expt2 |
| GASGSGPTIEVD             | 2 | 124339829;124339826                                    | N-Term(iTRAQ4plex)                                                  | 1362.65251 | 41 |           | Expt2 |
| LIPDGGVK                 | 1 | 149249582;149259021;149250101;149250358;82931053       | N-Term(iTRAQ4plex), C6(Methylthio), K9(iTRAQ4plex)                  | 1235.66899 | 41 |           | Expt2 |
| VVFQEFR                  | 2 | 114326446                                              | N-Term(iTRAQ4plex)                                                  | 1068.59656 | 41 |           | Expt2 |
| EYQTQLIOR                | 2 | 134288917                                              | N-Term(iTRAQ4plex)                                                  | 1322.72087 | 41 | 3.47      | Expt2 |
| CMPTFFQYK                | 2 | 6755911                                                | N-Term(iTRAQ4plex), C1(Methylthio), M2(Oxidation), K9(iTRAQ4plex)   | 1514.71221 | 41 |           | Expt2 |
| DYLCDGOEDCR              | 1 | 149253040;183979966                                    | N-Term(iTRAQ4plex), C4(Methylthio), C10(Methylthio)                 | 1552.56377 | 41 |           | Expt2 |
| TLIQNGASTIR              | 2 | 6753320                                                | N-Term(iTRAQ4plex), C6(Methylthio)                                  | 1466.75713 | 41 | 3.58      | Expt2 |
| SSPIYVGR                 | 4 | 6678329                                                | N-Term(iTRAQ4plex)                                                  | 1022.57689 | 41 |           | Expt2 |
| GLLQSGQIPGR              | 1 | 228480232                                              | N-Term(iTRAQ4plex)                                                  | 1269.74358 | 41 |           | Expt2 |
| DEFLIQASPR               | 2 | 148747526                                              | N-Term(iTRAQ4plex)                                                  | 1319.71147 | 41 |           | Expt2 |
| NLSFNITDELK              | 1 | 84875537                                               | N-Term(iTRAQ4plex), K12(iTRAQ4plex)                                 | 1710.91911 | 41 |           | Expt2 |
| IDGAVISSEPIAETIK         | 3 | 121949767;121949765                                    | N-Term(iTRAQ4plex), K17(iTRAQ4plex)                                 | 2032.14676 | 41 | 3.73      | Expt2 |
| AFAYLQVPER               | 1 | 149253040;183979966                                    | N-Term(iTRAQ4plex)                                                  | 1337.73284 | 41 |           | Expt2 |
| SSVLENFVGR               | 1 | 87299637;116063570;84490431;27369922                   | N-Term(iTRAQ4plex)                                                  | 1251.68120 | 41 |           | Expt2 |
| LTPYQLQMK                | 1 | 23956396                                               | N-Term(iTRAQ4plex), K10(iTRAQ4plex)                                 | 1523.88169 | 41 |           | Expt2 |
| MCDLVSDFDGFSER           | 2 | 31560737                                               | N-Term(iTRAQ4plex), M1(Oxidation), C2(Methylthio)                   | 1826.75176 | 41 |           | Expt2 |
| AGLVELLR                 | 2 | 149259328;6678059                                      | N-Term(iTRAQ4plex)                                                  | 1127.72539 | 41 | 3.47      | Expt2 |
| TYSWDNAQVLLVGNK          | 8 | 12963723;6679593;261862303;15042957                    | N-Term(iTRAQ4plex), K15(iTRAQ4plex)                                 | 1996.08561 | 41 | 3.76      | Expt2 |
| DQADPQCLFLR              | 2 | 55926127                                               | N-Term(iTRAQ4plex), C7(Methylthio)                                  | 1495.71672 | 41 | 3.60      | Expt2 |
| NFINNPLAQADWAAK          | 6 | 114326446                                              | N-Term(iTRAQ4plex), O9(Deamidated), K15(iTRAQ4plex)                 | 1962.05339 | 41 | 0.99 5.99 | Expt2 |
| ASALEFGEAETR             | 1 | 28077067                                               | N-Term(iTRAQ4plex)                                                  | 1582.78130 | 41 |           | Expt2 |

|                                  |   |                                                                                                                                   |                                                                     |            |    |      |       |
|----------------------------------|---|-----------------------------------------------------------------------------------------------------------------------------------|---------------------------------------------------------------------|------------|----|------|-------|
| SDSLAGVVIADSEYPSR                | 1 | 31543971                                                                                                                          | N-Term(iTRAQ4plex)                                                  | 1909.96653 | 41 |      | Expt2 |
| NLVDPEVVSFAGK                    | 1 | 149270772;149270774;153791796;116174791;118026931                                                                                 | N-Term(iTRAQ4plex), K14(iTRAQ4plex)                                 | 1810.01126 | 41 |      | Expt2 |
| LPEADDIQVSMLLLTADHDDR            | 1 | 6755152                                                                                                                           | N-Term(iTRAQ4plex), M12(Oxidation)                                  | 2688.30063 | 41 |      | Expt2 |
| VLSTPDLEVR                       | 1 | 15426055                                                                                                                          | N-Term(iTRAQ4plex)                                                  | 1272.73149 | 41 |      | Expt2 |
| IGFITPLOFYK                      | 2 | 30519997                                                                                                                          | N-Term(iTRAQ4plex), K11(iTRAQ4plex)                                 | 1564.93181 | 41 | 3.40 | Expt2 |
| DNLAEDIMR                        | 3 | 31982755                                                                                                                          | N-Term(iTRAQ4plex), M8(Oxidation)                                   | 1236.60466 | 41 |      | Expt2 |
| OEVELWIGLNDLK                    | 1 | 113930720                                                                                                                         | N-Term(iTRAQ4plex), K14(iTRAQ4plex)                                 | 1974.08274 | 41 |      | Expt2 |
| IIGATDSSGELMFLMK                 | 1 | 108860695;82913885;82951729;83014973;149262310                                                                                    | N-Term(iTRAQ4plex), M12(Oxidation), M15(Oxidation), K16(iTRAQ4plex) | 2033.06211 | 41 |      | Expt2 |
| DLFOVAFNR                        | 1 | 134288917                                                                                                                         | N-Term(iTRAQ4plex)                                                  | 1253.68035 | 41 |      | Expt2 |
| VITIMONPR                        | 1 | 6755368;149259085;149263957;94395028;94395371;149264584;149264635;82959202                                                        | N-Term(iTRAQ4plex)                                                  | 1215.70000 | 41 |      | Expt2 |
| VGPVPWLPGQTEAIK                  | 2 | 20452466                                                                                                                          | N-Term(iTRAQ4plex), K16(iTRAQ4plex)                                 | 1995.11734 | 41 | 4.17 | Expt2 |
| VLQDMGLPTGAAGR                   | 2 | 111607430;111607434;111607432;111607436                                                                                           | N-Term(iTRAQ4plex)                                                  | 1587.82854 | 41 | 3.71 | Expt2 |
| NIVVEGVR                         | 2 | 82886628;21704100                                                                                                                 | N-Term(iTRAQ4plex)                                                  | 1128.68901 | 41 |      | Expt2 |
| SMLEVNYPMENGIVR                  | 2 | 22122825                                                                                                                          | N-Term(iTRAQ4plex), M2(Oxidation), M9(Oxidation), N11(Deamidated)   | 1928.92253 | 41 |      | Expt2 |
| GTPEQOCCGFSNAVVOILR              | 2 | 21312153                                                                                                                          | N-Term(iTRAQ4plex), C8(Methylthio)                                  | 2234.12583 | 40 | 3.54 | Expt2 |
| GWNFNYLOFPR                      | 2 | 31543694                                                                                                                          | N-Term(iTRAQ4plex)                                                  | 1585.80364 | 40 | 4.73 | Expt2 |
| FIDTSQFILNR                      | 1 | 149260575;83627687                                                                                                                | N-Term(iTRAQ4plex)                                                  | 1497.82073 | 40 |      | Expt2 |
| LVQSPNSYFMDVK                    | 1 | 13385958;149260404;149261975                                                                                                      | N-Term(iTRAQ4plex), M10(Oxidation), K13(iTRAQ4plex)                 | 1831.96343 | 40 |      | Expt2 |
| GDLDISYITSR                      | 1 | 51317387                                                                                                                          | N-Term(iTRAQ4plex)                                                  | 1383.72002 | 40 |      | Expt2 |
| AAPSAQAEALAR                     | 1 | 149250564                                                                                                                         | N-Term(iTRAQ4plex)                                                  | 1228.67754 | 40 |      | Expt2 |
| LAQAAQSSVATITR                   | 2 | 227116327                                                                                                                         | N-Term(iTRAQ4plex)                                                  | 1560.88555 | 40 | 3.69 | Expt2 |
| TTIFISPEGR                       | 3 | 6755196                                                                                                                           | N-Term(iTRAQ4plex)                                                  | 1151.61833 | 40 |      | Expt2 |
| ATCIGNNSAAAVSMLK                 | 2 | 6755196                                                                                                                           | N-Term(iTRAQ4plex), C3(Methylthio), K16(iTRAQ4plex)                 | 1884.96183 | 40 | 3.88 | Expt2 |
| QFASQANMVGPIWTK                  | 2 | 11230802                                                                                                                          | N-Term(iTRAQ4plex), M8(Oxidation), K16(iTRAQ4plex)                  | 2110.09916 | 40 | 3.84 | Expt2 |
| QLCDNAGFDATNINLK                 | 2 | 238814391                                                                                                                         | N-Term(iTRAQ4plex), C3(Methylthio), K16(iTRAQ4plex)                 | 2071.02646 | 40 | 3.99 | Expt2 |
| GTAVPVPR                         | 1 | 163965368                                                                                                                         | N-Term(iTRAQ4plex)                                                  | 940.57103  | 40 |      | Expt2 |
| IFPGDTILETGEVIPPMMR              | 1 | 84781779                                                                                                                          | N-Term(iTRAQ4plex)                                                  | 2129.14652 | 40 |      | Expt2 |
| YGVVCEADTGR                      | 1 | 29244556                                                                                                                          | N-Term(iTRAQ4plex), C6(Methylthio)                                  | 1458.68804 | 40 |      | Expt2 |
| FGLEGCEVLIPALK                   | 1 | 85861164                                                                                                                          | N-Term(iTRAQ4plex), C6(Methylthio), K14(iTRAQ4plex)                 | 1823.0058  | 40 |      | Expt2 |
| YSSVSVV                          | 2 | 6755204                                                                                                                           | N-Term(iTRAQ4plex)                                                  | 882.47021  | 40 |      | Expt2 |
| APSTYGGMSVTSR                    | 2 | 21489935                                                                                                                          | N-Term(iTRAQ4plex), M8(Oxidation)                                   | 1560.74980 | 40 |      | Expt2 |
| GENGVGPTGSVGAAGPSGPNPPGPGVSR     | 2 | 111120329                                                                                                                         | N-Term(iTRAQ4plex), N3(Deamidated), N21(Deamidated)                 | 2745.35904 | 40 | 4.08 | Expt2 |
| GPSPRPPAAAYDTAGTFGSPLLGAGSFTPLLR | 2 | 94379918;58082069                                                                                                                 | N-Term(iTRAQ4plex)                                                  | 3398.76413 | 40 | 3.41 | Expt2 |
| YQIPALAOAGFR                     | 1 | 31982393                                                                                                                          | N-Term(iTRAQ4plex)                                                  | 1478.82932 | 40 |      | Expt2 |
| QIEINTISASFGGLASR                | 1 | 6680117                                                                                                                           | N-Term(iTRAQ4plex)                                                  | 1908.03568 | 40 |      | Expt2 |
| LEQQVNVQVQGDDEMIDVIGVTK          | 1 | 149252852;149255712;149255716;94404874;149270989;149270993;149271090;149271094                                                    | N-Term(iTRAQ4plex), M16(Oxidation), K24(iTRAQ4plex)                 | 2990.58213 | 40 |      | Expt2 |
| EFNIAGFPVTR                      | 1 | 68131562;12963609                                                                                                                 | N-Term(iTRAQ4plex)                                                  | 1394.76006 | 40 |      | Expt2 |
| SPQTPELVEALAFR                   | 1 | 126090857                                                                                                                         | N-Term(iTRAQ4plex)                                                  | 1701.93181 | 40 |      | Expt2 |
| MLLYTEVTR                        | 3 | 33859560                                                                                                                          | N-Term(iTRAQ4plex)                                                  | 1269.70378 | 40 |      | Expt2 |
| MIILLPVGTASVSQIEK                | 1 | 13385352                                                                                                                          | N-Term(iTRAQ4plex), K17(iTRAQ4plex)                                 | 2087.24594 | 40 |      | Expt2 |
| ADIWLSGITAIELAK                  | 1 | 89337277;21703922;19526920                                                                                                        | N-Term(iTRAQ4plex), K15(iTRAQ4plex)                                 | 1889.10349 | 40 |      | Expt2 |
| LAADDFR                          | 5 | 6680604;6754480;154090941;7106335;112983636;6680606;122425580;226823220;21489935;198278448;238231425;89179318;226823299;145966692 | N-Term(iTRAQ4plex)                                                  | 951.50366  | 40 |      | Expt2 |
| LIESSPMNEFETLTK                  | 2 | 157823695;157823731;157823795;157823761                                                                                           | N-Term(iTRAQ4plex), K17(iTRAQ4plex)                                 | 2185.13779 | 40 | 4.43 | Expt2 |
| LSQLEGVNER                       | 1 | 13928670                                                                                                                          | N-Term(iTRAQ4plex)                                                  | 1387.76836 | 40 |      | Expt2 |
| IPSPFDLGFPER                     | 1 | 13385322                                                                                                                          | N-Term(iTRAQ4plex)                                                  | 1615.86125 | 40 |      | Expt2 |
| OETFDAQLQAFQOEGIANITALK          | 2 | 115496850                                                                                                                         | N-Term(iTRAQ4plex), K23(iTRAQ4plex)                                 | 2781.48337 | 40 | 4.18 | Expt2 |
| VTLYDPMMSGILTSVQTK               | 2 | 56699423                                                                                                                          | N-Term(iTRAQ4plex), K17(iTRAQ4plex)                                 | 2141.17911 | 40 | 3.52 | Expt2 |
| SLDEEVGR                         | 1 | 111185907                                                                                                                         | N-Term(iTRAQ4plex)                                                  | 1048.54216 | 40 |      | Expt2 |
| LSVQCLLH                         | 1 | 21536248                                                                                                                          | N-Term(iTRAQ4plex), C5(Methylthio)                                  | 1102.58513 | 40 |      | Expt2 |

|                          |   |                              |                                                                      |            |    |      |       |
|--------------------------|---|------------------------------|----------------------------------------------------------------------|------------|----|------|-------|
| LTSEPOPOR                | 1 | 18390323                     | N-Term(iTRAQ4plex)                                                   | 1199.65190 | 40 |      | Expt2 |
| FGVEQVDMVFASFIR          | 1 | 31981562                     | N-Term(iTRAQ4plex)                                                   | 2004.00627 | 40 |      | Expt2 |
| APLNVOFSSPLPGEAVK        | 2 | 145966915                    | N-Term(iTRAQ4plex), K17(iTRAQ4plex)                                  | 2042.16263 | 40 | 3.75 | Expt2 |
| GVDLTEPAQPAR             | 1 | 13385374                     | N-Term(iTRAQ4plex)                                                   | 1397.75286 | 40 |      | Expt2 |
| SGQAGYVPCNILEAR          | 1 | 21040233                     | N-Term(iTRAQ4plex), C9(Methylthio)                                   | 1838.90495 | 40 |      | Expt2 |
| NDLAVVDVR                | 1 | 84875537                     | N-Term(iTRAQ4plex)                                                   | 1144.64897 | 40 |      | Expt2 |
| TSYLTELIDR               | 1 | 21703922:19526920            | N-Term(iTRAQ4plex)                                                   | 1354.73528 | 40 |      | Expt2 |
| MTLADIER                 | 1 | 7657583                      | N-Term(iTRAQ4plex)                                                   | 1092.58550 | 40 |      | Expt2 |
| TTLLEGFAGVEEAR           | 1 | 124378033                    | N-Term(iTRAQ4plex)                                                   | 1636.86919 | 40 |      | Expt2 |
| FEQIVEDYNGTLLR           | 1 | 13385810                     | N-Term(iTRAQ4plex)                                                   | 1932.98819 | 40 |      | Expt2 |
| ALEAEAAGLR               | 3 | 29336026                     | N-Term(iTRAQ4plex)                                                   | 1144.64385 | 40 |      | Expt2 |
| DGLILTSR                 | 2 | 55741460                     | N-Term(iTRAQ4plex)                                                   | 1018.60124 | 40 |      | Expt2 |
| AIEEGTLEIEIEEVR          | 2 | 76253779                     | N-Term(iTRAQ4plex)                                                   | 1889.94760 | 40 | 3.82 | Expt2 |
| NPVPTODNALYQQLLR         | 2 | 27229085                     | N-Term(iTRAQ4plex)                                                   | 2014.09165 | 40 | 3.80 | Expt2 |
| LGPLVEOGR                | 5 | 163644329                    | N-Term(iTRAQ4plex)                                                   | 1112.65581 | 40 |      | Expt2 |
| SQVINVIGNER              | 2 | 88853584                     | N-Term(iTRAQ4plex)                                                   | 1372.76604 | 40 | 3.56 | Expt2 |
| LLSLQPPGMTVPVQAPR        | 2 | 148747331                    | N-Term(iTRAQ4plex)                                                   | 1936.08469 | 40 | 3.93 | Expt2 |
| LSQNLISR                 | 2 | 229608920                    | N-Term(iTRAQ4plex)                                                   | 1074.64043 | 40 |      | Expt2 |
| VIMPCNWWWAR              | 1 | 11968164                     | N-Term(iTRAQ4plex), C5(Methylthio)                                   | 1564.76921 | 40 |      | Expt2 |
| SGEGEVSGLLR              | 1 | 170295840                    | N-Term(iTRAQ4plex)                                                   | 1247.67412 | 40 |      | Expt2 |
| TSDPMTSSFR               | 3 | 111074529                    | N-Term(iTRAQ4plex), M6(Oxidation)                                    | 1288.59831 | 40 |      | Expt2 |
| LPDGTSLQTFR              | 1 | 22122591                     | N-Term(iTRAQ4plex)                                                   | 1479.79424 | 40 |      | Expt2 |
| ELEDVTESAESMNR           | 1 | 29336026                     | N-Term(iTRAQ4plex), M12(Oxidation)                                   | 1769.80083 | 40 |      | Expt2 |
| GEEILSGAGR               | 2 | 211065507                    | N-Term(iTRAQ4plex)                                                   | 1203.64568 | 40 | 0.99 | Expt2 |
| SAINEVVTR                | 5 | 149234297:82898755:149233921 | N-Term(iTRAQ4plex)                                                   | 1132.64665 | 40 | 3.44 | Expt2 |
| TLDLPIYVTR               | 2 | 226823359                    | N-Term(iTRAQ4plex)                                                   | 1334.78240 | 40 | 3.44 | Expt2 |
| GDAVCTGSQWSSQPFCEEK      | 2 | 109627652                    | N-Term(iTRAQ4plex), C5(Methylthio), C16(Methylthio), K19(iTRAQ4plex) | 2367.99131 | 40 | 3.81 | Expt2 |
| AIDILDR                  | 2 | 21489933:33468949            | N-Term(iTRAQ4plex)                                                   | 959.56340  | 40 |      | Expt2 |
| NLDQDAMQVCR              | 2 | 6753320                      | N-Term(iTRAQ4plex), C9(Methylthio)                                   | 1367.63542 | 39 | 3.67 | Expt2 |
| NOGLDGLFR                | 1 | 70909345                     | N-Term(iTRAQ4plex)                                                   | 1163.63005 | 39 |      | Expt2 |
| YNLGLDLR                 | 1 | 6680027                      | N-Term(iTRAQ4plex)                                                   | 1107.63164 | 39 |      | Expt2 |
| TETITGFQVDAIPANGOTPVQR   | 3 | 46849812                     | N-Term(iTRAQ4plex), N15(Deamidated)                                  | 2488.28556 | 39 | 4.12 | Expt2 |
| FMPAGLIAGASLLMVAK        | 2 | 13384766                     | N-Term(iTRAQ4plex), K17(iTRAQ4plex)                                  | 1978.14713 | 39 | 3.61 | Expt2 |
| YIETDPANR                | 1 | 28916693                     | N-Term(iTRAQ4plex)                                                   | 1222.62139 | 39 |      | Expt2 |
| TTITITSSSTTVGSAR         | 1 | 148271071                    | N-Term(iTRAQ4plex)                                                   | 1815.94866 | 39 |      | Expt2 |
| LGDLVEEMR                | 4 | 31982755                     | N-Term(iTRAQ4plex), M9(Oxidation)                                    | 1414.66716 | 39 |      | Expt2 |
| TSGLOGEFDR               | 1 | 124487057                    | N-Term(iTRAQ4plex)                                                   | 1324.66362 | 39 |      | Expt2 |
| AGHIASAR                 | 1 | 33859482                     | N-Term(iTRAQ4plex)                                                   | 902.55510  | 39 |      | Expt2 |
| ESEGLYGQPGDETYQDIFR      | 1 | 62079289                     | N-Term(iTRAQ4plex)                                                   | 2348.09012 | 39 |      | Expt2 |
| FIEIAAR                  | 1 | 160333923                    | N-Term(iTRAQ4plex)                                                   | 963.57689  | 39 |      | Expt2 |
| EGIVALRR                 | 1 | 6753324                      | N-Term(iTRAQ4plex)                                                   | 1057.66362 | 39 |      | Expt2 |
| MLGADAVGMSTVPEVIVAR      | 1 | 149265958:183074535:7305395  | N-Term(iTRAQ4plex), M1(Oxidation), M9(Oxidation)                     | 2092.09494 | 39 |      | Expt2 |
| LPDGSSTFNQFSDAPLEEER     | 1 | 85861252                     | N-Term(iTRAQ4plex)                                                   | 2422.17295 | 39 |      | Expt2 |
| IEAINQAIANEYEVV          | 1 | 139948818                    | N-Term(iTRAQ4plex)                                                   | 1876.99297 | 39 |      | Expt2 |
| YATLATVSR                | 1 | 134288917                    | N-Term(iTRAQ4plex)                                                   | 1125.63762 | 39 |      | Expt2 |
| GIFEFWLTVFK              | 1 | 7657357:226443026            | N-Term(iTRAQ4plex), K11(iTRAQ4plex)                                  | 1624.94585 | 39 |      | Expt2 |
| NVAQAEEMVEFSSGLK         | 2 | 6680748                      | N-Term(iTRAQ4plex), M7(Oxidation), K15(iTRAQ4plex)                   | 1972.00248 | 39 | 3.84 | Expt2 |
| DFLLTAR                  | 1 | 82895306:94372654:94377377   | N-Term(iTRAQ4plex)                                                   | 979.56969  | 39 |      | Expt2 |
| NGPALQEAYVR              | 1 | 7304993:226423871:226423873  | N-Term(iTRAQ4plex), N1(Deamidated)                                   | 1362.70598 | 39 |      | Expt2 |
| TPQISMSDIDLNVK           | 3 | 61743961                     | N-Term(iTRAQ4plex), M6(Oxidation), K14(iTRAQ4plex)                   | 1865.00151 | 39 | 3.80 | Expt2 |
| NOEPPAPAQQLQPPAAVQGLEPAR | 2 | 111154067                    | N-Term(iTRAQ4plex)                                                   | 2779.46225 | 39 | 3.44 | Expt2 |
| VGYPDWIFLLR              | 2 | 51491845                     | N-Term(iTRAQ4plex)                                                   | 1623.90495 | 39 | 4.00 | Expt2 |
| EVFEDAMEIR               | 4 | 84875537                     | N-Term(iTRAQ4plex)                                                   | 1382.67546 | 39 | 3.93 | Expt2 |
| ALSIYEALGGQDPNVAK        | 2 | 22122725                     | N-Term(iTRAQ4plex), K18(iTRAQ4plex)                                  | 2131.16892 | 39 | 4.06 | Expt2 |
| GDFILVGLLMR              | 1 | 7657011                      | N-Term(iTRAQ4plex), M10(Oxidation)                                   | 1395.74382 | 39 |      | Expt2 |



|                                      |    |                                                                      |                                                      |            |    |      |       |
|--------------------------------------|----|----------------------------------------------------------------------|------------------------------------------------------|------------|----|------|-------|
| MGLVDQLVEPLPGIK                      | 2  | 33859811                                                             | N-Term(iTRAQ4plex), K16(iTRAQ4plex)                  | 1954.13523 | 39 | 4.48 | Expt2 |
| EAEPYLLPR                            | 1  | 16716341                                                             | N-Term(iTRAQ4plex)                                   | 1507.82903 | 39 |      | Expt2 |
| GSITSVQAIYVPAADLTDPAPATTFHAHDATTVLSR | 1  | 31980648                                                             | N-Term(iTRAQ4plex)                                   | 3858.98838 | 39 |      | Expt2 |
| NSLFDQFR                             | 2  | 33563252;167555029                                                   | N-Term(iTRAQ4plex)                                   | 1170.60491 | 39 |      | Expt2 |
| NILGGTVFR                            | 3  | 162417975;225759033                                                  | N-Term(iTRAQ4plex)                                   | 1120.65679 | 39 |      | Expt2 |
| EVDPLVYNMSHEDPGNVSYSYSEIGGLSEQIR     | 2  | 27754103                                                             | N-Term(iTRAQ4plex)                                   | 3478.66074 | 39 | 3.43 | Expt2 |
| YVVTIIDAPGHR                         | 2  | 126032329                                                            | N-Term(iTRAQ4plex)                                   | 1548.82871 | 39 | 3.60 | Expt2 |
| LLNOPNQWPLVK                         | 1  | 28395018                                                             | N-Term(iTRAQ4plex), K12(iTRAQ4plex)                  | 1738.02959 | 39 |      | Expt2 |
| FQOAVDAVEEFLR                        | 1  | 119392066;119392074                                                  | N-Term(iTRAQ4plex)                                   | 1695.88628 | 39 |      | Expt2 |
| TISAEVLAIIDENTGK                     | 2  | 110625833                                                            | N-Term(iTRAQ4plex), K15(iTRAQ4plex)                  | 1849.02317 | 39 | 3.94 | Expt2 |
| GVNTFSPGFR                           | 1  | 7106387;94388526;94388799                                            | N-Term(iTRAQ4plex)                                   | 1207.62053 | 39 |      | Expt2 |
| SALTLOFYDEFVEDYEPTK                  | 1  | 11612509;34328471                                                    | N-Term(iTRAQ4plex), K20(iTRAQ4plex)                  | 2714.31919 | 39 |      | Expt2 |
| ATISDEIER                            | 1  | 30794432                                                             | N-Term(iTRAQ4plex)                                   | 1306.66155 | 39 |      | Expt2 |
| MNLSAIQDR                            | 1  | 13385518;23956194                                                    | N-Term(iTRAQ4plex)                                   | 1191.62761 | 39 |      | Expt2 |
| GPLELSPAYGPPGSALGFPESSR              | 1  | 124378050                                                            | N-Term(iTRAQ4plex)                                   | 2430.24717 | 39 |      | Expt2 |
| EFDELSPSAQR                          | 3  | 6806903;158635979                                                    | N-Term(iTRAQ4plex)                                   | 1422.69853 | 39 | 3.42 | Expt2 |
| YSEIEPSTEGEVIYR                      | 2  | 31982223                                                             | N-Term(iTRAQ4plex)                                   | 1915.93816 | 39 |      | Expt2 |
| AGLQLF                               | 7  | 71979675                                                             | N-Term(iTRAQ4plex), O4(Deamidated)                   | 793.45854  | 39 |      | Expt2 |
| FILLEK                               | 2  | 226423931;124486943                                                  | N-Term(iTRAQ4plex), K6(iTRAQ4plex)                   | 1050.69133 | 39 |      | Expt2 |
| LQPMTEIVSR                           | 1  | 6678483                                                              | N-Term(iTRAQ4plex), M5(Oxidation)                    | 1448.75481 | 39 |      | Expt2 |
| GLPLVDGGWNTVPISK                     | 1  | 56699432;56699434                                                    | N-Term(iTRAQ4plex), K17(iTRAQ4plex)                  | 2056.14507 | 39 |      | Expt2 |
| VAEFTTNLMEEEEK                       | 3  | 114326446                                                            | N-Term(iTRAQ4plex), K14(iTRAQ4plex)                  | 1957.97422 | 39 | 4.90 | Expt2 |
| NTETQGPDLFSPYVPSK                    | 2  | 158937304                                                            | N-Term(iTRAQ4plex), K17(iTRAQ4plex)                  | 2168.11576 | 39 | 3.66 | Expt2 |
| TIEDTMTVK                            | 1  | 124487362                                                            | N-Term(iTRAQ4plex), K10(iTRAQ4plex)                  | 1438.80315 | 39 |      | Expt2 |
| VGETTIDLENR                          | 1  | 149270772;149270774;153791796                                        | N-Term(iTRAQ4plex)                                   | 1390.73332 | 39 |      | Expt2 |
| GTPEPPLGATDER                        | 1  | 161016822;161016820                                                  | N-Term(iTRAQ4plex)                                   | 1540.77068 | 39 |      | Expt2 |
| MLPPPMWR                             | 1  | 121674790;121674799;149254861                                        | N-Term(iTRAQ4plex)                                   | 1268.67668 | 38 |      | Expt2 |
| GDIFLVR                              | 1  | 225543319;94408011                                                   | N-Term(iTRAQ4plex)                                   | 963.57787  | 38 |      | Expt2 |
| YDQAEEDLR                            | 1  | 21312564                                                             | N-Term(iTRAQ4plex)                                   | 1410.66570 | 38 |      | Expt2 |
| LEETLPVIR                            | 1  | 12025542                                                             | N-Term(iTRAQ4plex)                                   | 1213.72807 | 38 |      | Expt2 |
| DIPLPEELVFTVEK                       | 1  | 17157983                                                             | N-Term(iTRAQ4plex), K15(iTRAQ4plex)                  | 2032.11692 | 38 |      | Expt2 |
| GYTLGVEGR                            | 2  | 93102409                                                             | N-Term(iTRAQ4plex)                                   | 1194.66301 | 38 |      | Expt2 |
| SGGAGFNMCRR                          | 2  | 30794450                                                             | N-Term(iTRAQ4plex), C10(Methylthio)                  | 1317.56487 | 38 | 3.52 | Expt2 |
| NPAMMOEMMR                           | 1  | 22726191;15805016;34328236                                           | N-Term(iTRAQ4plex)                                   | 1382.61760 | 38 |      | Expt2 |
| YESSALPAGQLTSLPDYASR                 | 1  | 13385998                                                             | N-Term(iTRAQ4plex)                                   | 2270.15483 | 38 |      | Expt2 |
| LLLVGAPR                             | 1  | 31982236                                                             | N-Term(iTRAQ4plex)                                   | 982.65239  | 38 |      | Expt2 |
| GTIEYTVESR                           | 1  | 194328702;194328706;18700026;194328708                               | N-Term(iTRAQ4plex)                                   | 1298.67449 | 38 |      | Expt2 |
| SSNPMMVLQLEPER                       | 2  | 28201956                                                             | N-Term(iTRAQ4plex)                                   | 1645.85344 | 38 | 3.65 | Expt2 |
| EALGDAQOSVR                          | 2  | 31980994                                                             | N-Term(iTRAQ4plex)                                   | 1317.69133 | 38 | 3.77 | Expt2 |
| DICTSSPSVTLNVR                       | 1  | 110625833                                                            | N-Term(iTRAQ4plex), C3(Methylthio)                   | 1654.82927 | 38 |      | Expt2 |
| LLISLSQGNR                           | 1  | 149265356;149265358;160707921                                        | N-Term(iTRAQ4plex)                                   | 1244.74895 | 38 |      | Expt2 |
| GAIEVLIR                             | 1  | 161353449                                                            | N-Term(iTRAQ4plex)                                   | 1014.64647 | 38 |      | Expt2 |
| AISTNLGLR                            | 1  | 31542602                                                             | N-Term(iTRAQ4plex), N6(Deamidated)                   | 1089.63860 | 38 |      | Expt2 |
| AVTPPMLLTATPGGLPPAAVAAAAATAK         | 2  | 76677895;257196186;257196183                                         | N-Term(iTRAQ4plex), K31(iTRAQ4plex)                  | 3082.77390 | 38 | 4.45 | Expt2 |
| GENGIVGPTGSVGAAGPSGPNPGPGVGSRR       | 2  | 111120329                                                            | N-Term(iTRAQ4plex), N3(Deamidated)                   | 2744.34647 | 38 | 4.18 | Expt2 |
| VMTIPYQMPFASPSPVICAGGQDR             | 5  | 6754994                                                              | N-Term(iTRAQ4plex), M9(Oxidation), C17(Methylthio)   | 2624.25547 | 38 | 3.71 | Expt2 |
| YEVEDGTGPNRR                         | 1  | 226423935                                                            | N-Term(iTRAQ4plex), N10(Deamidated)                  | 1438.66142 | 38 |      | Expt2 |
| IALLEEAR                             | 10 | 149266483;225543191;225543193                                        | N-Term(iTRAQ4plex)                                   | 1058.63249 | 38 |      | Expt2 |
| LLVTDMSDAEQYR                        | 1  | 28076885                                                             | N-Term(iTRAQ4plex)                                   | 1684.83159 | 38 |      | Expt2 |
| LCSLFYNTNEEVAK                       | 1  | 25141233                                                             | N-Term(iTRAQ4plex), C2(Methylthio), K13(iTRAQ4plex)  | 1850.93204 | 38 |      | Expt2 |
| LLVLSGER                             | 1  | 117938332;117938334                                                  | N-Term(iTRAQ4plex)                                   | 1159.67974 | 38 |      | Expt2 |
| IVLESLODQOQESTVGGGVNRR               | 2  | 226423922                                                            | N-Term(iTRAQ4plex), Q10(Deamidated), Q12(Deamidated) | 2447.21372 | 38 | 3.49 | Expt2 |
| DLOMWNISLR                           | 1  | 126723336                                                            | N-Term(iTRAQ4plex)                                   | 1332.74736 | 38 |      | Expt2 |
| VEFMDDTSR                            | 1  | 149255324;149248869;149251798;149253028;82895184;149254364;149257368 | N-Term(iTRAQ4plex), M4(Oxidation)                    | 1259.57207 | 38 |      | Expt2 |

|                            |   |                                                            |                                                                      |            |    |            |
|----------------------------|---|------------------------------------------------------------|----------------------------------------------------------------------|------------|----|------------|
| GAOQOILEAIPK               | 1 | 27734136                                                   | N-Term(iTRAQ4plex), K12(iTRAQ4plex)                                  | 1552.93767 | 38 | Expt2      |
| DVDPDVAYSSIPYEK            | 1 | 116734870                                                  | N-Term(iTRAQ4plex), K15(iTRAQ4plex)                                  | 1985.99736 | 38 | Expt2      |
| EVAAPDVGR                  | 1 | 6679811;94536791                                           | N-Term(iTRAQ4plex)                                                   | 1057.57793 | 38 | Expt2      |
| EYVLPSFEVR                 | 2 | 126518317                                                  | N-Term(iTRAQ4plex)                                                   | 1382.74614 | 38 | Expt2      |
| SAYDSTMETMNYAQIR           | 1 | 29293809                                                   | N-Term(iTRAQ4plex)                                                   | 2024.91936 | 38 | Expt2      |
| VAPEVSEVIFGHVLTAGCGQNPTR   | 2 | 110625948;148747461                                        | N-Term(iTRAQ4plex), C19(Methylthio)                                  | 2800.39688 | 38 | 3.56 Expt2 |
| GFGFVCSPEEATK              | 2 | 22507391;34419622;6754972;3156065<br>6;166157896;255652857 | N-Term(iTRAQ4plex), C6(Methylthio), K15(iTRAQ4plex)                  | 1939.91141 | 38 | 3.41 Expt2 |
| ALVDSLSAR                  | 1 | 31982089                                                   | N-Term(iTRAQ4plex)                                                   | 1075.62468 | 38 | Expt2      |
| LOIDEQLR                   | 1 | 51036613;163954941;163954943;8392<br>1589;17998694         | N-Term(iTRAQ4plex)                                                   | 1158.66130 | 38 | Expt2      |
| ALEDVCIETIEAGFMTK          | 2 | 162417975                                                  | N-Term(iTRAQ4plex), C6(Methylthio), K17(iTRAQ4plex)                  | 2204.09232 | 38 | 4.47 Expt2 |
| ISMPDVLNFK                 | 1 | 61743961                                                   | N-Term(iTRAQ4plex), K11(iTRAQ4plex)                                  | 1566.84079 | 38 | Expt2      |
| ALCADLSPR                  | 1 | 42476274                                                   | N-Term(iTRAQ4plex), C3(Methylthio)                                   | 1135.56987 | 38 | Expt2      |
| VSPFGLR                    | 1 | 37537522                                                   | N-Term(iTRAQ4plex)                                                   | 919.55016  | 38 | Expt2      |
| ADSSLLAR                   | 1 | 16033881                                                   | N-Term(iTRAQ4plex)                                                   | 976.55828  | 38 | Expt2      |
| GDLLFLNTR                  | 2 | 9910550                                                    | N-Term(iTRAQ4plex)                                                   | 1192.68279 | 38 | Expt2      |
| TNAENEFVTIK                | 1 | 126116585                                                  | N-Term(iTRAQ4plex), K11(iTRAQ4plex)                                  | 1553.84026 | 38 | Expt2      |
| GLFLPEDENLR                | 3 | 125628659                                                  | N-Term(iTRAQ4plex)                                                   | 1446.77410 | 38 | 3.54 Expt2 |
| AVDTVFNGR                  | 1 | 19527130                                                   | N-Term(iTRAQ4plex), N7(Deamidated)                                   | 1123.58391 | 38 | Expt2      |
| SPVTFLSDLR                 | 1 | 82953488;189458844;189458842                               | N-Term(iTRAQ4plex)                                                   | 1278.72063 | 38 | Expt2      |
| SQDADLPGSSGAPENLTFK        | 2 | 145587092                                                  | N-Term(iTRAQ4plex), K19(iTRAQ4plex)                                  | 2222.11576 | 38 | 3.67 Expt2 |
| LTLYFEGR                   | 1 | 6678329                                                    | N-Term(iTRAQ4plex)                                                   | 1142.63469 | 38 | Expt2      |
| VIQCFAETGOVOK              | 2 | 51491845                                                   | N-Term(iTRAQ4plex), C4(Methylthio), K13(iTRAQ4plex)                  | 1784.92710 | 38 | 3.77 Expt2 |
| YSEVFEAINITNNEK            | 1 | 149245220                                                  | N-Term(iTRAQ4plex), K15(iTRAQ4plex)                                  | 2059.06729 | 38 | Expt2      |
| AIVWGMQTR                  | 1 | 29293809                                                   | N-Term(iTRAQ4plex)                                                   | 1205.66142 | 38 | Expt2      |
| ISMPDVFNLK                 | 2 | 61743961                                                   | N-Term(iTRAQ4plex), K11(iTRAQ4plex)                                  | 1566.84079 | 38 | Expt2      |
| YDLLCLEGLAR                | 1 | 31981400                                                   | N-Term(iTRAQ4plex), C5(Methylthio)                                   | 1455.74895 | 38 | Expt2      |
| VQALPTPTNGTR               | 1 | 157823695;157823731;157823795;157<br>823761                | N-Term(iTRAQ4plex), N10(Deamidated)                                  | 1500.81731 | 38 | Expt2      |
| AIMNLDVEQYR                | 2 | 224922803                                                  | N-Term(iTRAQ4plex)                                                   | 1495.76811 | 38 | 4.04 Expt2 |
| DLPPVLLVR                  | 1 | 149270069;124517716                                        | N-Term(iTRAQ4plex)                                                   | 1165.74346 | 38 | Expt2      |
| NLPPVLLVR                  | 1 | 119226231;119226233                                        | N-Term(iTRAQ4plex), N1(Deamidated)                                   | 1165.74346 | 38 | Expt2      |
| QLTOPETSYGR                | 3 | 7304993;226423871;226423873                                | N-Term(iTRAQ4plex)                                                   | 1423.73198 | 38 | 3.91 Expt2 |
| OSLOVIESAMER               | 1 | 8393156                                                    | N-Term(iTRAQ4plex)                                                   | 1534.80449 | 38 | Expt2      |
| VVTYGMANLLTGPK             | 1 | 33859662                                                   | N-Term(iTRAQ4plex), M6(Oxidation), K14(iTRAQ4plex)                   | 1767.99991 | 38 | Expt2      |
| GCILTLVER                  | 1 | 149258001;22203755                                         | N-Term(iTRAQ4plex), C2(Methylthio)                                   | 1193.64873 | 38 | Expt2      |
| EILGGLTVTR                 | 1 | 224922832                                                  | N-Term(iTRAQ4plex)                                                   | 1202.72380 | 38 | Expt2      |
| FSTETTFVLVDKYEIL           | 1 | 148747410                                                  | N-Term(iTRAQ4plex), K11(iTRAQ4plex)                                  | 2094.11528 | 38 | Expt2      |
| LNSNTQVLLSATMPSDVLVTK      | 2 | 21450625;226823309                                         | N-Term(iTRAQ4plex), M14(Oxidation), K23(iTRAQ4plex)                  | 2763.51816 | 38 | 3.61 Expt2 |
| VMGNQVPEVTR                | 1 | 9790161                                                    | N-Term(iTRAQ4plex), M2(Oxidation)                                    | 1536.79851 | 37 | Expt2      |
| APLVCLPVFVSK               | 2 | 19526926                                                   | N-Term(iTRAQ4plex), C5(Methylthio), K12(iTRAQ4plex)                  | 1606.93155 | 37 | Expt2      |
| ELGTVMR                    | 1 | 6753244;149255253;149255689;66783<br>71                    | N-Term(iTRAQ4plex)                                                   | 949.52460  | 37 | Expt2      |
| LVIPSELGYGER               | 2 | 6679805                                                    | N-Term(iTRAQ4plex)                                                   | 1476.81999 | 37 | Expt2      |
| QVLALCVYPNLLSSPDFPEDAK     | 1 | 33413404                                                   | N-Term(iTRAQ4plex), C6(Methylthio), K22(iTRAQ4plex)                  | 2753.42539 | 37 | Expt2      |
| SMVEDITGLR                 | 1 | 82950147;82950149;149264086                                | N-Term(iTRAQ4plex), M2(Oxidation)                                    | 1280.66521 | 37 | Expt2      |
| AIPLIANR                   | 1 | 84794609                                                   | N-Term(iTRAQ4plex)                                                   | 1011.64488 | 37 | Expt2      |
| NTIETGILAEAR               | 2 | 153791270                                                  | N-Term(iTRAQ4plex)                                                   | 1489.80022 | 37 | 3.92 Expt2 |
| NLDPFLLFDEFK               | 1 | 51317401                                                   | N-Term(iTRAQ4plex), K12(iTRAQ4plex)                                  | 1785.96347 | 37 | Expt2      |
| ESILELITSR                 | 1 | 31981302;158966670                                         | N-Term(iTRAQ4plex)                                                   | 1304.75395 | 37 | Expt2      |
| LALDMEISAYR                | 2 | 188219589;113195686                                        | N-Term(iTRAQ4plex), M5(Oxidation)                                    | 1441.75371 | 37 | Expt2      |
| GNLPPNTEGYIGIR             | 1 | 16905127                                                   | N-Term(iTRAQ4plex)                                                   | 1757.96648 | 37 | Expt2      |
| EAVCIVLSDDTCSDEK           | 1 | 225543319;94408011                                         | N-Term(iTRAQ4plex), C4(Methylthio), C12(Methylthio), K16(iTRAQ4plex) | 2106.93125 | 37 | Expt2      |
| AFIITGQTYTR                | 2 | 29788764                                                   | N-Term(iTRAQ4plex)                                                   | 1414.78264 | 37 | Expt2      |
| VVDLTMDDIR                 | 1 | 6679337                                                    | N-Term(iTRAQ4plex)                                                   | 1407.71037 | 37 | Expt2      |
| VPPETIDSVIVGNVMOSSSDAAYLAR | 1 | 29126205                                                   | N-Term(iTRAQ4plex), M15(Oxidation)                                   | 2879.46915 | 37 | Expt2      |

|                              |   |                                                                                                                                                                                                                                                                                                                                                                                                                                                       |                                                                                    |            |    |      |       |
|------------------------------|---|-------------------------------------------------------------------------------------------------------------------------------------------------------------------------------------------------------------------------------------------------------------------------------------------------------------------------------------------------------------------------------------------------------------------------------------------------------|------------------------------------------------------------------------------------|------------|----|------|-------|
| DSPDLLLLLR                   | 1 | 165377251                                                                                                                                                                                                                                                                                                                                                                                                                                             | N-Term(iTRAQ4plex)                                                                 | 1298.78472 | 37 |      | Expt2 |
| NPYLPPEITTYLK                | 1 | 149267864;75677437                                                                                                                                                                                                                                                                                                                                                                                                                                    | N-Term(iTRAQ4plex), K13(iTRAQ4plex)                                                | 1837.04350 | 37 |      | Expt2 |
| LISYSYMER                    | 3 | 6753762                                                                                                                                                                                                                                                                                                                                                                                                                                               | N-Term(iTRAQ4plex)                                                                 | 1305.66387 | 37 |      | Expt2 |
| MILLEVNRR                    | 1 | 149268562;112363072                                                                                                                                                                                                                                                                                                                                                                                                                                   | N-Term(iTRAQ4plex)                                                                 | 1245.71282 | 37 |      | Expt2 |
| DAVITVPAFFNOAER              | 1 | 157951706                                                                                                                                                                                                                                                                                                                                                                                                                                             | N-Term(iTRAQ4plex)                                                                 | 1821.96245 | 37 |      | Expt2 |
| VDSQILGTVSVIK                | 1 | 6806903;158635979;36031132                                                                                                                                                                                                                                                                                                                                                                                                                            | N-Term(iTRAQ4plex), K15(iTRAQ4plex)                                                | 1863.07376 | 37 |      | Expt2 |
| AMADPEVQOIMSDPAMR            | 1 | 14389431                                                                                                                                                                                                                                                                                                                                                                                                                                              | N-Term(iTRAQ4plex), M2(Oxidation), M11(Oxidation), M16(Oxidation)                  | 2081.94742 | 37 |      | Expt2 |
| YYQADQLVQR                   | 1 | 111154082;111154076                                                                                                                                                                                                                                                                                                                                                                                                                                   | N-Term(iTRAQ4plex)                                                                 | 1427.74016 | 37 |      | Expt2 |
| LLGIFENODR                   | 2 | 169808397                                                                                                                                                                                                                                                                                                                                                                                                                                             | N-Term(iTRAQ4plex)                                                                 | 1348.73345 | 37 |      | Expt2 |
| SWLPQDCTLVDMK                | 1 | 13385434                                                                                                                                                                                                                                                                                                                                                                                                                                              | N-Term(iTRAQ4plex), C7(Methylthio), K13(iTRAQ4plex)                                | 1869.91971 | 37 |      | Expt2 |
| VVDMAYMASK                   | 1 | 149248895;149249564;149249566;149251040;149251044;149251140;149251223;149251463;149251509;149251903;149251905;149251911;149251964;149251966;149252413;149253819;149253823;149257623;149258744;149258770;149258772;149258934;149258938;149259607;149259652;149259964;149260709;149260711;94387946;149260748;149263021;149265154;149265922;149266302;149266427;149266431;149268472;149268967;149270469;149270673;149272161;94408118;149273204;149275059 | N-Term(iTRAQ4plex), M5(Oxidation), M8(Oxidation), K11(iTRAQ4plex)                  | 1547.81467 | 37 |      | Expt2 |
| GLQFLDR                      | 1 | 165932389                                                                                                                                                                                                                                                                                                                                                                                                                                             | N-Term(iTRAQ4plex)                                                                 | 1121.60832 | 37 |      | Expt2 |
| LSALSAAGGAR                  | 1 | 149260763                                                                                                                                                                                                                                                                                                                                                                                                                                             | N-Term(iTRAQ4plex)                                                                 | 1117.64849 | 37 |      | Expt2 |
| AVTIFIR                      | 4 | 6671702                                                                                                                                                                                                                                                                                                                                                                                                                                               | N-Term(iTRAQ4plex)                                                                 | 963.61394  | 37 |      | Expt2 |
| ASSLAASESPASALPTGIPEAEPR     | 1 | 75677516                                                                                                                                                                                                                                                                                                                                                                                                                                              | N-Term(iTRAQ4plex)                                                                 | 2453.27542 | 37 |      | Expt2 |
| SETITEELVGLMKN               | 1 | 51830180;82975294;113680352                                                                                                                                                                                                                                                                                                                                                                                                                           | N-Term(iTRAQ4plex), M13(Oxidation), K15(iTRAQ4plex)                                | 1997.03702 | 37 |      | Expt2 |
| EFLIFIR                      | 1 | 149253239;31981086                                                                                                                                                                                                                                                                                                                                                                                                                                    | N-Term(iTRAQ4plex)                                                                 | 1081.65727 | 37 |      | Expt2 |
| GLVVI                        | 3 | 149270015                                                                                                                                                                                                                                                                                                                                                                                                                                             | N-Term(iTRAQ4plex)                                                                 | 644.44659  | 37 |      | Expt2 |
| QELAEARR                     | 1 | 167900427                                                                                                                                                                                                                                                                                                                                                                                                                                             | N-Term(iTRAQ4plex)                                                                 | 1116.61650 | 37 |      | Expt2 |
| ELGLSSPASGGLVGVYNGK          | 2 | 13385294                                                                                                                                                                                                                                                                                                                                                                                                                                              | N-Term(iTRAQ4plex), N18(Deamidated), K20(iTRAQ4plex)                               | 2193.20047 | 37 | 4.19 | Expt2 |
| ESLLFGR                      | 1 | 225735584;225735582                                                                                                                                                                                                                                                                                                                                                                                                                                   | N-Term(iTRAQ4plex)                                                                 | 1094.59563 | 37 |      | Expt2 |
| TDAVDSVVR                    | 1 | 77404392                                                                                                                                                                                                                                                                                                                                                                                                                                              | N-Term(iTRAQ4plex)                                                                 | 1105.59722 | 37 |      | Expt2 |
| SPYTVTVGQACNPAACR            | 2 | 125347376                                                                                                                                                                                                                                                                                                                                                                                                                                             | N-Term(iTRAQ4plex), C11(Methylthio), C16(Methylthio)                               | 1973.88213 | 37 | 3.47 | Expt2 |
| YEEELTLTR                    | 2 | 170014682;170014686                                                                                                                                                                                                                                                                                                                                                                                                                                   | N-Term(iTRAQ4plex)                                                                 | 1297.67766 | 37 | 3.45 | Expt2 |
| EIIIGDR                      | 1 | 6680748                                                                                                                                                                                                                                                                                                                                                                                                                                               | N-Term(iTRAQ4plex)                                                                 | 959.56536  | 37 |      | Expt2 |
| NLICAFITDR                   | 1 | 149263881;6677759;134949013                                                                                                                                                                                                                                                                                                                                                                                                                           | N-Term(iTRAQ4plex), C4(Methylthio)                                                 | 1355.69792 | 37 |      | Expt2 |
| ADPSQDVR                     | 1 | 6753484                                                                                                                                                                                                                                                                                                                                                                                                                                               | N-Term(iTRAQ4plex)                                                                 | 1031.52519 | 37 |      | Expt2 |
| GTVLLSGPR                    | 4 | 83699424                                                                                                                                                                                                                                                                                                                                                                                                                                              | N-Term(iTRAQ4plex)                                                                 | 1043.63371 | 37 |      | Expt2 |
| CVCPSNTMCR                   | 1 | 149261823;164607147                                                                                                                                                                                                                                                                                                                                                                                                                                   | C1(Methylthio), N-Term(iTRAQ4plex), C3(Methylthio), M9(Oxidation), C10(Methylthio) | 1510.55657 | 37 |      | Expt2 |
| TVALWDLR                     | 2 | 47059484;157909799                                                                                                                                                                                                                                                                                                                                                                                                                                    | N-Term(iTRAQ4plex)                                                                 | 1117.64849 | 37 |      | Expt2 |
| TDYMMVSGYGR                  | 1 | 31982030                                                                                                                                                                                                                                                                                                                                                                                                                                              | N-Term(iTRAQ4plex)                                                                 | 1389.66106 | 37 |      | Expt2 |
| ALPILELLK                    | 1 | 158517929                                                                                                                                                                                                                                                                                                                                                                                                                                             | N-Term(iTRAQ4plex), K10(iTRAQ4plex)                                                | 1426.92571 | 37 |      | Expt2 |
| DPASENPPELLMFPSVYPLR         | 1 | 6753374                                                                                                                                                                                                                                                                                                                                                                                                                                               | N-Term(iTRAQ4plex), M12(Oxidation)                                                 | 2479.23777 | 37 |      | Expt2 |
| VDSPLMEDSDGSPSLPTK           | 3 | 13385882                                                                                                                                                                                                                                                                                                                                                                                                                                              | N-Term(iTRAQ4plex), K18(iTRAQ4plex)                                                | 2191.06821 | 37 | 5.11 | Expt2 |
| GLIPLIGVAPEK                 | 2 | 27369581;7657583                                                                                                                                                                                                                                                                                                                                                                                                                                      | N-Term(iTRAQ4plex), K13(iTRAQ4plex)                                                | 1623.00748 | 37 |      | Expt2 |
| LPSNSVYAGTVPSR               | 1 | 21450263                                                                                                                                                                                                                                                                                                                                                                                                                                              | N-Term(iTRAQ4plex)                                                                 | 1591.85112 | 37 |      | Expt2 |
| GVDVDFPR                     | 1 | 7305085;7305087                                                                                                                                                                                                                                                                                                                                                                                                                                       | N-Term(iTRAQ4plex)                                                                 | 1112.54888 | 37 |      | Expt2 |
| IGSSLYALGTODSTDICK           | 1 | 149263134;27754031                                                                                                                                                                                                                                                                                                                                                                                                                                    | N-Term(iTRAQ4plex), C17(Methylthio), K18(iTRAQ4plex)                               | 2206.10007 | 37 |      | Expt2 |
| FMNSGOTCVAPDYIILCDPSIQNEIVEK | 3 | 163310769                                                                                                                                                                                                                                                                                                                                                                                                                                             | N-Term(iTRAQ4plex), C8(Methylthio), C16(Methylthio), K27(iTRAQ4plex)               | 3394.57322 | 37 | 4.24 | Expt2 |
| DVATFLR                      | 1 | 13385006                                                                                                                                                                                                                                                                                                                                                                                                                                              | N-Term(iTRAQ4plex)                                                                 | 965.55211  | 36 |      | Expt2 |
| FNAILCSR                     | 2 | 149265356;149265358;160707921                                                                                                                                                                                                                                                                                                                                                                                                                         | N-Term(iTRAQ4plex), C6(Methylthio)                                                 | 1113.56743 | 36 |      | Expt2 |
| GSTLEER                      | 1 | 111074529                                                                                                                                                                                                                                                                                                                                                                                                                                             | N-Term(iTRAQ4plex)                                                                 | 935.49504  | 36 |      | Expt2 |
| SVMDATQIAGNCLR               | 1 | 112293266                                                                                                                                                                                                                                                                                                                                                                                                                                             | N-Term(iTRAQ4plex), M3(Oxidation), C13(Methylthio)                                 | 1797.88492 | 36 |      | Expt2 |
| ISLVDLAGSER                  | 2 | 124487163;86990458;145966744;160708010;160333877;86990460                                                                                                                                                                                                                                                                                                                                                                                             | N-Term(iTRAQ4plex)                                                                 | 1303.73223 | 36 |      | Expt2 |

|                          |   |                                         |                                                                     |            |    |      |       |
|--------------------------|---|-----------------------------------------|---------------------------------------------------------------------|------------|----|------|-------|
| EGSYSISLVYEGEEVPR        | 1 | 125347376                               | N-Term(iTRAQ4plex)                                                  | 2058.01883 | 36 |      | Expt2 |
| QIENVLR                  | 1 | 149258752;14149756                      | N-Term(iTRAQ4plex)                                                  | 1015.59283 | 36 |      | Expt2 |
| LINSLYPEGOAPVK           | 1 | 30519911                                | N-Term(iTRAQ4plex), K14(iTRAQ4plex)                                 | 1817.04558 | 36 |      | Expt2 |
| QLTQVDGLSTIEFQR          | 1 | 149250564                               | N-Term(iTRAQ4plex)                                                  | 1980.05545 | 36 |      | Expt2 |
| FEAPLFNAR                | 1 | 229892318                               | N-Term(iTRAQ4plex)                                                  | 1208.65508 | 36 |      | Expt2 |
| LLVVPWTOR                | 1 | 31982300;149258165;149258167;17647499   | N-Term(iTRAQ4plex)                                                  | 1418.82988 | 36 |      | Expt2 |
| NLMFLVLR                 | 3 | 219276601;219275596                     | N-Term(iTRAQ4plex)                                                  | 1149.69145 | 36 |      | Expt2 |
| IIPAIWFR                 | 1 | 13385678                                | N-Term(iTRAQ4plex)                                                  | 1159.71514 | 36 |      | Expt2 |
| SLDPFFETYINALR           | 1 | 133778953                               | N-Term(iTRAQ4plex)                                                  | 1829.96147 | 36 |      | Expt2 |
| AVLGDDEITR               | 1 | 149267866;149267868;149267870;149267872 | N-Term(iTRAQ4plex)                                                  | 1232.66313 | 36 |      | Expt2 |
| GFLWYSGR                 | 2 | 125490382                               | N-Term(iTRAQ4plex)                                                  | 1242.68083 | 36 |      | Expt2 |
| GIVGYDV                  | 1 | 149253631;149262331;63606968;83000453   | N-Term(iTRAQ4plex)                                                  | 866.47552  | 36 |      | Expt2 |
| ALGLSNFNSR               | 1 | 149252910;10946870                      | N-Term(iTRAQ4plex)                                                  | 1222.67143 | 36 |      | Expt2 |
| DSETEVEELR               | 1 | 194328702;194328706;18700026;194328708  | N-Term(iTRAQ4plex)                                                  | 1350.65288 | 36 |      | Expt2 |
| GEPSPGENGAPGOMGPR        | 1 | 34328108                                | N-Term(iTRAQ4plex), Q14(Deamidated)                                 | 1839.82512 | 36 |      | Expt2 |
| YVENFGLIDGR              | 2 | 13385134                                | N-Term(iTRAQ4plex)                                                  | 1426.74626 | 36 | 3.56 | Expt2 |
| ICDPYSWLEDPDSEQTK        | 1 | 6755152                                 | N-Term(iTRAQ4plex), C2(Methylthio), K17(iTRAQ4plex)                 | 2360.07328 | 36 |      | Expt2 |
| GLLSILR                  | 1 | 9789881                                 | N-Term(iTRAQ4plex)                                                  | 915.60503  | 36 |      | Expt2 |
| ELVALMSAIR               | 1 | 116734870                               | N-Term(iTRAQ4plex), M6(Oxidation)                                   | 1262.72905 | 36 |      | Expt2 |
| QLSOSLPAIVELAEADAK       | 3 | 77539776;77539770;8394027               | N-Term(iTRAQ4plex), K18(iTRAQ4plex)                                 | 2213.26792 | 36 | 5.82 | Expt2 |
| IIPGGIADR                | 1 | 6755973                                 | N-Term(iTRAQ4plex)                                                  | 1055.63420 | 36 |      | Expt2 |
| LAAVDATMNOVLASR          | 1 | 58037267                                | N-Term(iTRAQ4plex), M8(Oxidation)                                   | 1719.91989 | 36 |      | Expt2 |
| AEEPGQAYETPR             | 1 | 237681204;33636693                      | N-Term(iTRAQ4plex)                                                  | 1548.74468 | 36 |      | Expt2 |
| GAETTLALPMASDLELYDVENSMT | 1 | 226423922                               | N-Term(iTRAQ4plex), M24(Oxidation)                                  | 2887.39524 | 36 |      | Expt2 |
| ALESMDAPVLIMATNR         | 2 | 6755382                                 | N-Term(iTRAQ4plex), M6(Oxidation)                                   | 1891.98026 | 36 | 3.64 | Expt2 |
| YIELLTR                  | 3 | 82950147;82950149;149264086             | N-Term(iTRAQ4plex)                                                  | 1051.62683 | 36 |      | Expt2 |
| ELVLALYDYQEK             | 1 | 115496850                               | N-Term(iTRAQ4plex), K12(iTRAQ4plex)                                 | 1771.97824 | 36 |      | Expt2 |
| GAAGALMYYDITR            | 1 | 18390323                                | N-Term(iTRAQ4plex), M7(Oxidation)                                   | 1497.78874 | 36 |      | Expt2 |
| DLAEIGIAGVGNNDVK         | 2 | 61657921                                | N-Term(iTRAQ4plex), K15(iTRAQ4plex)                                 | 1816.01072 | 36 | 3.69 | Expt2 |
| FLDDAFR                  | 1 | 29789239                                | N-Term(iTRAQ4plex)                                                  | 1027.53032 | 36 |      | Expt2 |
| VLLATLSIPITPER           | 1 | 146219837                               | N-Term(iTRAQ4plex)                                                  | 1667.02677 | 36 |      | Expt2 |
| ESYPTTLVVQADLOGEGLSTTAK  | 1 | 6753374                                 | N-Term(iTRAQ4plex), K25(iTRAQ4plex)                                 | 2930.53232 | 36 |      | Expt2 |
| IDDVNTR                  | 1 | 6753322                                 | N-Term(iTRAQ4plex)                                                  | 1075.58574 | 36 |      | Expt2 |
| DAQSSVLFDTVGOVR          | 1 | 239052674                               | N-Term(iTRAQ4plex)                                                  | 1765.92290 | 36 |      | Expt2 |
| STGNNCICGIWDDTGAMK       | 1 | 164518893                               | N-Term(iTRAQ4plex), C6(Methylthio), C8(Methylthio), K19(iTRAQ4plex) | 2429.03556 | 36 |      | Expt2 |
| DANNMPVTAR               | 2 | 6671549                                 | N-Term(iTRAQ4plex)                                                  | 1232.62248 | 36 |      | Expt2 |
| YGDDEVNTLQLESR           | 1 | 209977090;209977095                     | N-Term(iTRAQ4plex)                                                  | 1883.89641 | 36 |      | Expt2 |
| SMNIFGGFR                | 1 | 27369998                                | N-Term(iTRAQ4plex)                                                  | 1172.60478 | 36 |      | Expt2 |
| VLFDTGLVNPR              | 2 | 94394792;171543883                      | N-Term(iTRAQ4plex)                                                  | 1374.78887 | 36 | 3.41 | Expt2 |
| VEGSEPSVYYR              | 2 | 149275191;31542438                      | N-Term(iTRAQ4plex)                                                  | 1530.75737 | 36 | 3.92 | Expt2 |
| MASTFIGNSTAIQELFK        | 1 | 27754056                                | N-Term(iTRAQ4plex), M1(Oxidation), K17(iTRAQ4plex)                  | 2162.14524 | 36 |      | Expt2 |
| MSATFIGNSTAIQELFK        | 1 | 33859488;22165384;21746161              | N-Term(iTRAQ4plex), M1(Oxidation), K17(iTRAQ4plex)                  | 2162.14524 | 36 |      | Expt2 |
| MSSTFIGNSTAIQELFK        | 1 | 83030206;12963615                       | N-Term(iTRAQ4plex), K17(iTRAQ4plex)                                 | 2162.14524 | 36 |      | Expt2 |
| AMTMPPVSQPEGSIVLR        | 2 | 55926127                                | N-Term(iTRAQ4plex)                                                  | 1957.03910 | 36 | 4.30 | Expt2 |
| VFNNTLER                 | 1 | 29789080                                | N-Term(iTRAQ4plex)                                                  | 1299.68340 | 36 |      | Expt2 |
| YISPGTEAISGR             | 1 | 226423935                               | N-Term(iTRAQ4plex)                                                  | 1394.74040 | 36 |      | Expt2 |
| GALTVGITNTVGVSSISR       | 1 | 7305085;7305087                         | N-Term(iTRAQ4plex)                                                  | 1776.99944 | 36 |      | Expt2 |
| LONLOQTDLSPVIVNR         | 1 | 225637487                               | N-Term(iTRAQ4plex)                                                  | 2095.20719 | 36 |      | Expt2 |
| NMVQQALVIR               | 1 | 21450277;30409956;226958351;21450321    | N-Term(iTRAQ4plex), M2(Oxidation)                                   | 1428.81377 | 36 |      | Expt2 |
| TPSTNVPSDQPEYSK          | 1 | 149258763;170763496                     | N-Term(iTRAQ4plex), K16(iTRAQ4plex)                                 | 2005.00357 | 36 |      | Expt2 |
| TDPLGPVR                 | 1 | 115647999                               | N-Term(iTRAQ4plex)                                                  | 998.57445  | 36 |      | Expt2 |
| QIGDTLPVSCGISASR         | 1 | 31791059                                | N-Term(iTRAQ4plex), C10(Methylthio)                                 | 1837.93523 | 36 |      | Expt2 |
| FLEEYLSSTPQR             | 2 | 164518942                               | N-Term(iTRAQ4plex)                                                  | 1613.83342 | 36 | 4.00 | Expt2 |

|                            |    |                                                   |                                                                      |            |    |      |       |
|----------------------------|----|---------------------------------------------------|----------------------------------------------------------------------|------------|----|------|-------|
| ALYEAGER                   | 3  | 124517663                                         | N-Term(iTRAQ4plex)                                                   | 1052.55168 | 36 |      | Expt2 |
| VAOLEQVYIR                 | 3  | 13385598                                          | N-Term(iTRAQ4plex)                                                   | 1362.78691 | 36 | 3.60 | Expt2 |
| VPVLGCVDR                  | 1  | 12963685                                          | N-Term(iTRAQ4plex), C6(Methylthio)                                   | 1147.60808 | 36 |      | Expt2 |
| GLDIDGLYR                  | 1  | 83776555                                          | N-Term(iTRAQ4plex)                                                   | 1165.63310 | 36 |      | Expt2 |
| DMLEASILDYLGK              | 1  | 126723461                                         | N-Term(iTRAQ4plex), M2(Oxidation), K14(iTRAQ4plex)                   | 1872.99167 | 36 |      | Expt2 |
| EVEETDEMDQVELVDFDPNOER     | 1  | 149258138:6680297                                 | N-Term(iTRAQ4plex), M8(Oxidation)                                    | 2826.24625 | 36 |      | Expt2 |
| DPGVLDLR                   | 1  | 149263303:21886811                                | N-Term(iTRAQ4plex)                                                   | 915.50395  | 36 |      | Expt2 |
| GOFSTDELVAEVEK             | 1  | 51491845                                          | N-Term(iTRAQ4plex), K14(iTRAQ4plex)                                  | 1839.96421 | 36 |      | Expt2 |
| STTPDITGYR                 | 4  | 46849812                                          | N-Term(iTRAQ4plex)                                                   | 1254.64470 | 36 | 3.71 | Expt2 |
| SGIPALVR                   | 3  | 28395018                                          | N-Term(iTRAQ4plex)                                                   | 1013.62401 | 36 |      | Expt2 |
| VSGPWEEANPEALAR            | 1  | 165905609:165905611                               | N-Term(iTRAQ4plex)                                                   | 1769.89336 | 36 |      | Expt2 |
| ENEFFIVTQTK                | 2  | 12963497:156231023:156231021                      | N-Term(iTRAQ4plex), C11(Methylthio), K12(iTRAQ4plex)                 | 1792.89383 | 36 |      | Expt2 |
| GSDCGIWNVNIPTSGAIEGGAFGGEK | 1  | 188219757:188035915                               | N-Term(iTRAQ4plex), C4(Methylthio), K26(iTRAQ4plex)                  | 2783.37467 | 35 |      | Expt2 |
| OSSYGOOSYNNQGGQNTSSGGQGGGR | 1  | 30794412                                          | N-Term(iTRAQ4plex)                                                   | 2891.26517 | 35 |      | Expt2 |
| GVAVVTPTR                  | 1  | 161484644                                         | N-Term(iTRAQ4plex)                                                   | 1043.63579 | 35 |      | Expt2 |
| EATSSLVLPVDYIAQDTPAPSVR    | 2  | 161484644                                         | N-Term(iTRAQ4plex)                                                   | 2670.42240 | 35 |      | Expt2 |
| LPIGSYF                    | 1  | 6679166                                           | N-Term(iTRAQ4plex)                                                   | 940.52880  | 35 |      | Expt2 |
| MEEESGAPCVPSGNGAPGPK       | 2  | 21313308:158186704                                | N-Term(iTRAQ4plex), C9(Methylthio), N14(Deamidated), K20(iTRAQ4plex) | 2249.01047 | 35 | 4.22 | Expt2 |
| FLSAGR                     | 1  | 6753484                                           | N-Term(iTRAQ4plex)                                                   | 794.46501  | 35 |      | Expt2 |
| YEILTPNSIPK                | 1  | 114326446                                         | N-Term(iTRAQ4plex), K11(iTRAQ4plex)                                  | 1562.90459 | 35 |      | Expt2 |
| EGSGNPTLPLNLAGR            | 1  | 210147541:211065515:210147539                     | N-Term(iTRAQ4plex)                                                   | 1736.94292 | 35 |      | Expt2 |
| ALIESYONLTR                | 2  | 116089343:116089341:116089345:116089351:116089347 | N-Term(iTRAQ4plex)                                                   | 1451.80132 | 35 | 3.86 | Expt2 |
| DAFVAIVQSVK                | 1  | 31981302:158966670                                | N-Term(iTRAQ4plex), K11(iTRAQ4plex)                                  | 1464.87082 | 35 |      | Expt2 |
| LLDVMDR                    | 1  | 114145467                                         | N-Term(iTRAQ4plex)                                                   | 1005.55370 | 35 |      | Expt2 |
| GPATVEDLPSAFEK             | 2  | 9055336                                           | N-Term(iTRAQ4plex), K15(iTRAQ4plex)                                  | 1877.98258 | 35 | 4.18 | Expt2 |
| DYFVSCPGR                  | 1  | 160358829                                         | N-Term(iTRAQ4plex), C6(Methylthio)                                   | 1233.55425 | 35 |      | Expt2 |
| VPPFNSSGEPGNVPLVAESSK      | 1  | 225690566                                         | N-Term(iTRAQ4plex), K22(iTRAQ4plex)                                  | 2497.32254 | 35 |      | Expt2 |
| ELPOFATGENLPR              | 1  | 149259719:94158994                                | N-Term(iTRAQ4plex)                                                   | 1615.84751 | 35 |      | Expt2 |
| VPDNYGDEIAIELR             | 1  | 170784813:170784811                               | N-Term(iTRAQ4plex)                                                   | 1747.90337 | 35 |      | Expt2 |
| CEYYCSPGYTLK               | 1  | 8394362                                           | N-Term(iTRAQ4plex), C1(Methylthio), C5(Methylthio), K12(iTRAQ4plex)  | 1806.78073 | 35 |      | Expt2 |
| ETLIDVAR                   | 1  | 6753324                                           | N-Term(iTRAQ4plex)                                                   | 1060.61492 | 35 |      | Expt2 |
| MPSLEVSVPK                 | 1  | 61743961                                          | N-Term(iTRAQ4plex), K10(iTRAQ4plex)                                  | 1374.79216 | 35 |      | Expt2 |
| QEEFYA                     | 1  | 6755438:42476310                                  | N-Term(iTRAQ4plex)                                                   | 930.43401  | 35 |      | Expt2 |
| DSTYSMSLTLTK               | 1  | 149255637:149255639:149255641                     | N-Term(iTRAQ4plex), M6(Oxidation), K14(iTRAQ4plex)                   | 1838.94145 | 35 |      | Expt2 |
| GIYMWVDEGR                 | 1  | 8393866                                           | N-Term(iTRAQ4plex), M4(Oxidation)                                    | 1385.66692 | 35 |      | Expt2 |
| FPTLWSGAR                  | 1  | 149270322:124487099                               | N-Term(iTRAQ4plex)                                                   | 1178.64348 | 35 |      | Expt2 |
| GLTGPIGPPGAGANGEK          | 34 | 166064040:169658375                               | N-Term(iTRAQ4plex), N15(Deamidated), K18(iTRAQ4plex)                 | 1879.01604 | 35 | 4.72 | Expt2 |
| SISIRTR                    | 1  | 149234023                                         | N-Term(iTRAQ4plex)                                                   | 976.59032  | 35 |      | Expt2 |
| FSPNSSNPIIVSCGWK           | 3  | 6680047                                           | N-Term(iTRAQ4plex), C13(Methylthio), K17(iTRAQ4plex)                 | 2185.06418 | 35 | 3.87 | Expt2 |
| QLLAGVAGAVSR               | 1  | 27369998                                          | N-Term(iTRAQ4plex)                                                   | 1342.79473 | 35 |      | Expt2 |
| NMMGNIAGANLNR              | 1  | 9790161                                           | N-Term(iTRAQ4plex), M3(Oxidation)                                    | 1535.75273 | 35 |      | Expt2 |
| LPPSTQAPSVNGVCTDSSOPLEQOR  | 1  | 55926127                                          | N-Term(iTRAQ4plex), C14(Methylthio)                                  | 3158.51804 | 35 |      | Expt2 |
| ATFSSVPR                   | 1  | 183979966                                         | N-Term(iTRAQ4plex)                                                   | 1008.55858 | 35 |      | Expt2 |
| AMTTGAIAMLSTILYSR          | 1  | 7242197                                           | N-Term(iTRAQ4plex), M2(Oxidation), M10(Oxidation)                    | 2047.07114 | 35 |      | Expt2 |
| AELAEPLR                   | 1  | 13928670                                          | N-Term(iTRAQ4plex)                                                   | 1155.68596 | 35 |      | Expt2 |
| LYSESLAR                   | 3  | 116089273:33859560                                | N-Term(iTRAQ4plex)                                                   | 1082.60027 | 35 |      | Expt2 |
| EAGVEMDEEDLSTPNEK          | 2  | 211065507                                         | N-Term(iTRAQ4plex), K18(iTRAQ4plex)                                  | 2296.03855 | 35 |      | Expt2 |
| LIVENLSSR                  | 1  | 82895195:224967104:165377173:119226243            | N-Term(iTRAQ4plex)                                                   | 1174.69280 | 35 |      | Expt2 |
| TEGISTSIIIR                | 1  | 46877071:29164513:6753552                         | N-Term(iTRAQ4plex)                                                   | 1436.77312 | 35 |      | Expt2 |
| LLGELILDR                  | 2  | 31541826:161086893                                | N-Term(iTRAQ4plex)                                                   | 1185.73088 | 35 |      | Expt2 |
| TFQYQDSLPSLPVPALEESLK      | 1  | 17157983                                          | N-Term(iTRAQ4plex), K21(iTRAQ4plex)                                  | 2650.43167 | 35 |      | Expt2 |
| LLAQDIR                    | 1  | 6753762                                           | N-Term(iTRAQ4plex)                                                   | 972.60063  | 35 |      | Expt2 |
| AILEQNFR                   | 1  | 160333881                                         | N-Term(iTRAQ4plex)                                                   | 1134.64214 | 35 |      | Expt2 |
| EGIAQTVFLGLNR              | 1  | 6680117                                           | N-Term(iTRAQ4plex)                                                   | 1561.88201 | 35 |      | Expt2 |

|                         |    |                                                                                                                           |                                                                                       |            |  |      |    |      |       |
|-------------------------|----|---------------------------------------------------------------------------------------------------------------------------|---------------------------------------------------------------------------------------|------------|--|------|----|------|-------|
| IGFFQGDIR               | 1  | 31560705:58218988                                                                                                         | N-Term(iTRAQ4plex)                                                                    | 1196.65618 |  |      | 35 |      | Expt2 |
| GLEAEVLR                | 1  | 29336026                                                                                                                  | N-Term(iTRAQ4plex)                                                                    | 1030.60063 |  |      | 35 |      | Expt2 |
| YVTLYITNYENK            | 1  | 10092608                                                                                                                  | N-Term(iTRAQ4plex), N11(Deamidated), K13(iTRAQ4plex)                                  | 1866.98178 |  |      | 35 |      | Expt2 |
| VSMESVR                 | 1  | 148277039                                                                                                                 | N-Term(iTRAQ4plex)                                                                    | 951.50554  |  |      | 35 |      | Expt2 |
| LYLQOGLCEPLPLSDSR       | 4  | 31982089                                                                                                                  | N-Term(iTRAQ4plex), C9(Methylthio)                                                    | 2379.18912 |  | 4.41 | 35 |      | Expt2 |
| MDENQFVAVSTNAAK         | 2  | 209862992:6681219:40254595:209862923:40068507                                                                             | N-Term(iTRAQ4plex), K16(iTRAQ4plex)                                                   | 2014.01676 |  | 3.79 | 35 |      | Expt2 |
| TILSLMTR                | 1  | 29293809                                                                                                                  | N-Term(iTRAQ4plex)                                                                    | 1078.64116 |  |      | 35 |      | Expt2 |
| SEGLYLFENGQR            | 1  | 6677869                                                                                                                   | N-Term(iTRAQ4plex), N9(Deamidated)                                                    | 1557.77458 |  |      | 35 |      | Expt2 |
| GPLMMYISK               | 2  | 33859482                                                                                                                  | N-Term(iTRAQ4plex), K9(iTRAQ4plex)                                                    | 1327.74358 |  | 3.56 | 35 |      | Expt2 |
| FTVLLMPNGPMR            | 1  | 6755100                                                                                                                   | N-Term(iTRAQ4plex), N8(Deamidated)                                                    | 1520.80771 |  |      | 35 |      | Expt2 |
| ALAPOLAR                | 1  | 160333789                                                                                                                 | N-Term(iTRAQ4plex)                                                                    | 983.61046  |  |      | 35 |      | Expt2 |
| LNFAVASR                | 1  | 112293264                                                                                                                 | N-Term(iTRAQ4plex)                                                                    | 1021.59270 |  |      | 35 |      | Expt2 |
| YGEPEVFINK              | 2  | 149252953:23956214                                                                                                        | N-Term(iTRAQ4plex), K11(iTRAQ4plex)                                                   | 1540.82598 |  | 4.03 | 35 |      | Expt2 |
| YLSNAVAR                | 1  | 15617203                                                                                                                  | N-Term(iTRAQ4plex)                                                                    | 1101.58367 |  |      | 35 |      | Expt2 |
| LYSPSQIGAFVLMK          | 1  | 162461907                                                                                                                 | N-Term(iTRAQ4plex), K14(iTRAQ4plex)                                                   | 1842.05399 |  |      | 35 |      | Expt2 |
| ICDFGLAR                | 2  | 21489933:6754632:149262258:34328180:6679813:122937353:29244575:226342982:134032016:27777648:170650719:170650721:226371752 | N-Term(iTRAQ4plex), C2(Methylthio)                                                    | 1084.53899 |  |      | 35 |      | Expt2 |
| VLVWDLR                 | 1  | 31560618                                                                                                                  | N-Term(iTRAQ4plex)                                                                    | 1044.63262 |  |      | 35 |      | Expt2 |
| ELEDDGLER               | 1  | 6753762                                                                                                                   | N-Term(iTRAQ4plex)                                                                    | 1161.58953 |  |      | 35 |      | Expt2 |
| DFLSQEGADPDSIEMVATR     | 1  | 31982223                                                                                                                  | N-Term(iTRAQ4plex), M15(Oxidation)                                                    | 2241.04740 |  |      | 35 |      | Expt2 |
| TVFDEAIR                | 3  | 18875380:45592934:6679601                                                                                                 | N-Term(iTRAQ4plex)                                                                    | 1094.59770 |  |      | 35 |      | Expt2 |
| NPDGTMNLNMWECAIPGK      | 1  | 149269919:8299865                                                                                                         | N-Term(iTRAQ4plex), C13(Methylthio), K18(iTRAQ4plex)                                  | 2325.07871 |  |      | 35 |      | Expt2 |
| LOGLLCGR                | 1  | 82997826:38084778:94405733:83019564:34328288                                                                              | N-Term(iTRAQ4plex), C7(Methylthio)                                                    | 1106.59221 |  |      | 35 |      | Expt2 |
| ATGEGVEFR               | 1  | 114155125                                                                                                                 | N-Term(iTRAQ4plex)                                                                    | 1256.64189 |  |      | 35 |      | Expt2 |
| SSAYESLMEIVK            | 1  | 88014720                                                                                                                  | N-Term(iTRAQ4plex), K12(iTRAQ4plex)                                                   | 1644.88675 |  |      | 35 |      | Expt2 |
| SLADIAR                 | 1  | 149254985                                                                                                                 | N-Term(iTRAQ4plex)                                                                    | 889.52336  |  |      | 35 |      | Expt2 |
| GANPVEIR                | 1  | 149270048:183396771:51766670:94390282                                                                                     | N-Term(iTRAQ4plex)                                                                    | 999.57231  |  |      | 35 |      | Expt2 |
| GEVSAPDLEVLPGVEDIQAPGAK | 1  | 149263538:149263685                                                                                                       | N-Term(iTRAQ4plex), K25(iTRAQ4plex)                                                   | 2765.49387 |  |      | 35 |      | Expt2 |
| GTOCEDINECEVFPVCK       | 1  | 118197277                                                                                                                 | N-Term(iTRAQ4plex), C4(Methylthio), C10(Methylthio), C17(Methylthio), K18(iTRAQ4plex) | 2396.99906 |  |      | 35 |      | Expt2 |
| VVNVSSMVSRLR            | 1  | 113680352                                                                                                                 | N-Term(iTRAQ4plex), M7(Oxidation)                                                     | 1350.75823 |  |      | 35 |      | Expt2 |
| DVLSNLIPIK              | 1  | 13385942                                                                                                                  | N-Term(iTRAQ4plex), K9(iTRAQ4plex)                                                    | 1286.80474 |  |      | 35 |      | Expt2 |
| DIFPIAFPR               | 1  | 116089322                                                                                                                 | N-Term(iTRAQ4plex)                                                                    | 1219.69841 |  |      | 35 |      | Expt2 |
| NMVPOQALVIR             | 1  | 21450277:30409956:226958351:21450321                                                                                      | N-Term(iTRAQ4plex)                                                                    | 1412.81595 |  |      | 35 |      | Expt2 |
| LTEGCSFR                | 2  | 13385958:149260404                                                                                                        | N-Term(iTRAQ4plex), C5(Methylthio)                                                    | 1102.51457 |  |      | 35 |      | Expt2 |
| VYEIQDIYENSWTK          | 1  | 51093840                                                                                                                  | N-Term(iTRAQ4plex), K14(iTRAQ4plex)                                                   | 2076.05216 |  |      | 35 |      | Expt2 |
| NLQPDTPYTIIVVPVYTEGDGGR | 26 | 111074529                                                                                                                 | N-Term(iTRAQ4plex), O3(Deamidated)                                                    | 2637.33872 |  | 0.99 | 35 | 6.78 | Expt2 |
| IDSAASTYVEGPNPPDYR      | 1  | 82932679                                                                                                                  | N-Term(iTRAQ4plex)                                                                    | 2100.00542 |  |      | 35 |      | Expt2 |
| IGVTLSLR                | 1  | 51830180:82975294:113680352                                                                                               | N-Term(iTRAQ4plex)                                                                    | 988.62901  |  |      | 35 |      | Expt2 |
| YFDLGLPNR               | 1  | 225579033                                                                                                                 | N-Term(iTRAQ4plex)                                                                    | 1238.66509 |  |      | 35 |      | Expt2 |
| ALDLFSDNAPPELLEIINEDIAK | 1  | 149262992:58037267                                                                                                        | N-Term(iTRAQ4plex), K24(iTRAQ4plex)                                                   | 2925.57950 |  |      | 34 |      | Expt2 |
| LTMLDIASNR              | 2  | 12963569                                                                                                                  | N-Term(iTRAQ4plex)                                                                    | 1277.70159 |  | 4.01 | 34 |      | Expt2 |
| LLENMTEVVR              | 1  | 88758582:88758584                                                                                                         | N-Term(iTRAQ4plex)                                                                    | 1347.74175 |  |      | 34 |      | Expt2 |
| TTVINMPR                | 1  | 82892305:94380332:13507626:21539593                                                                                       | N-Term(iTRAQ4plex)                                                                    | 1075.60539 |  |      | 34 |      | Expt2 |
| DPETLLGYSMVGCQR         | 2  | 93102409                                                                                                                  | N-Term(iTRAQ4plex), C13(Methylthio)                                                   | 1858.86930 |  | 3.43 | 34 |      | Expt2 |
| EAAGEGPLYEDPPDOK        | 2  | 6753086                                                                                                                   | N-Term(iTRAQ4plex), K17(iTRAQ4plex)                                                   | 2103.05600 |  | 3.45 | 34 |      | Expt2 |
| GGPLSGPYR               | 3  | 31982861                                                                                                                  | N-Term(iTRAQ4plex)                                                                    | 1047.57280 |  |      | 34 |      | Expt2 |
| GFOLDIR                 | 2  | 118197277                                                                                                                 | N-Term(iTRAQ4plex)                                                                    | 992.56297  |  |      | 34 |      | Expt2 |
| ETICSQDER               | 1  | 31542413                                                                                                                  | N-Term(iTRAQ4plex), C4(Methylthio)                                                    | 1270.55486 |  |      | 34 |      | Expt2 |
| ITSEALLVTQQLVK          | 1  | 189409138                                                                                                                 | N-Term(iTRAQ4plex), K14(iTRAQ4plex)                                                   | 1831.11893 |  |      | 34 |      | Expt2 |
| VVNLNDR                 | 2  | 229608920                                                                                                                 | N-Term(iTRAQ4plex)                                                                    | 1174.60845 |  |      | 34 |      | Expt2 |
| QGFQWISR                | 1  | 16716499                                                                                                                  | N-Term(iTRAQ4plex)                                                                    | 1290.76811 |  |      | 34 |      | Expt2 |
| FDETEALANER             | 2  | 149264152:160420299                                                                                                       | N-Term(iTRAQ4plex)                                                                    | 1566.75664 |  | 4.02 | 34 |      | Expt2 |

|                         |   |                                                                    |                                                                    |            |    |      |       |
|-------------------------|---|--------------------------------------------------------------------|--------------------------------------------------------------------|------------|----|------|-------|
| DLPETVR                 | 1 | 225543482                                                          | N-Term(iTRAQ4plex)                                                 | 973.54057  | 34 |      | Expt2 |
| LYLVDLAGSEK             | 1 | 45433560:40254635:61657921                                         | N-Term(iTRAQ4plex), K11(iTRAQ4plex)                                | 1495.86783 | 34 |      | Expt2 |
| ELPDVLER                | 1 | 6755152                                                            | N-Term(iTRAQ4plex)                                                 | 1114.62505 | 34 |      | Expt2 |
| NQEAQQQLGR              | 1 | 55926127                                                           | N-Term(iTRAQ4plex)                                                 | 1399.78179 | 34 |      | Expt2 |
| QYENFINR                | 1 | 112421039                                                          | N-Term(iTRAQ4plex)                                                 | 1227.62578 | 34 |      | Expt2 |
| IEVIEIMTOR              | 1 | 6754220:63652391:82951294:8506050<br>7:260304980                   | N-Term(iTRAQ4plex), M7(Oxidation)                                  | 1378.74077 | 34 |      | Expt2 |
| NEVLNMIGNSLSTGGR        | 1 | 149271434:149274434:6753738:72421<br>48                            | N-Term(iTRAQ4plex), M5(Oxidation)                                  | 1806.95450 | 34 |      | Expt2 |
| TLNDIMLIK               | 1 | 51092303:84781771                                                  | N-Term(iTRAQ4plex), M7(Oxidation), K10(iTRAQ4plex)                 | 1479.83757 | 34 |      | Expt2 |
| TLNNDIMLIK              | 2 | 149254987:149255095:84781768:5101<br>0909:6755893:6755891:16716569 | N-Term(iTRAQ4plex), N3(Deamidated), M7(Oxidation), K10(iTRAQ4plex) | 1479.83757 | 34 |      | Expt2 |
| AEYLOTWSTLLPNINK        | 1 | 154240724                                                          | N-Term(iTRAQ4plex), K16(iTRAQ4plex)                                | 2179.21067 | 34 |      | Expt2 |
| IDGITIOAR               | 2 | 115496850                                                          | N-Term(iTRAQ4plex)                                                 | 1130.66606 | 34 |      | Expt2 |
| MMEIMTR                 | 2 | 94395665:149265827                                                 | N-Term(iTRAQ4plex)                                                 | 1055.51396 | 34 |      | Expt2 |
| EVSTPANOR               | 2 | 111074529                                                          | N-Term(iTRAQ4plex)                                                 | 1145.60674 | 34 |      | Expt2 |
| EAGVFVPR                | 1 | 29293809                                                           | N-Term(iTRAQ4plex)                                                 | 1018.58031 | 34 |      | Expt2 |
| GLLDDLRL                | 1 | 62526118                                                           | N-Term(iTRAQ4plex)                                                 | 945.55126  | 34 |      | Expt2 |
| FTDILVR                 | 1 | 110835723:110835726                                                | N-Term(iTRAQ4plex)                                                 | 1007.60228 | 34 |      | Expt2 |
| LVSYPYDMAR              | 1 | 160707889                                                          | N-Term(iTRAQ4plex), M8(Oxidation)                                  | 1374.68279 | 34 |      | Expt2 |
| LEAPLEELR               | 1 | 134053913                                                          | N-Term(iTRAQ4plex)                                                 | 1213.69060 | 34 |      | Expt2 |
| VISESPDQWEAR            | 1 | 149254348:112807186                                                | N-Term(iTRAQ4plex)                                                 | 1657.83196 | 34 |      | Expt2 |
| ITLETDEDMVTEIR          | 1 | 19527174                                                           | N-Term(iTRAQ4plex), M9(Oxidation)                                  | 1824.91020 | 34 |      | Expt2 |
| LLACIASR                | 1 | 94387984                                                           | N-Term(iTRAQ4plex), C4(Methylthio)                                 | 1036.57561 | 34 |      | Expt2 |
| AFIPOLLSR               | 2 | 121583922                                                          | N-Term(iTRAQ4plex)                                                 | 1188.72270 | 34 |      | Expt2 |
| LDDPMTEIVSR             | 1 | 6678483                                                            | N-Term(iTRAQ4plex)                                                 | 1432.76018 | 34 |      | Expt2 |
| LMDVGLIAIR              | 1 | 14389431                                                           | N-Term(iTRAQ4plex), M2(Oxidation)                                  | 1260.74883 | 34 |      | Expt2 |
| LEEVDADDYDNR            | 4 | 160332229                                                          | N-Term(iTRAQ4plex)                                                 | 1712.74175 | 34 | 3.86 | Expt2 |
| TGTVALEVR               | 1 | 93102409                                                           | N-Term(iTRAQ4plex)                                                 | 1089.64043 | 34 |      | Expt2 |
| ASSTANLIFEDCR           | 1 | 31982522                                                           | N-Term(iTRAQ4plex), C12(Methylthio)                                | 1616.75383 | 34 |      | Expt2 |
| AAEDLFVNIR              | 1 | 28395023                                                           | N-Term(iTRAQ4plex)                                                 | 1291.71758 | 34 |      | Expt2 |
| YMTISGFQIETIDR          | 1 | 6753060                                                            | N-Term(iTRAQ4plex), M2(Oxidation)                                  | 1962.96512 | 34 |      | Expt2 |
| YLDLGAYYSAR             | 1 | 58037109                                                           | N-Term(iTRAQ4plex)                                                 | 1435.73552 | 34 |      | Expt2 |
| ACTILLR                 | 2 | 6753320                                                            | N-Term(iTRAQ4plex), C2(Methylthio)                                 | 979.55571  | 34 |      | Expt2 |
| GAQWYLIDSR              | 1 | 164519045                                                          | N-Term(iTRAQ4plex)                                                 | 1352.70940 | 34 |      | Expt2 |
| ISASRAAAAR              | 1 | 162461907                                                          | N-Term(iTRAQ4plex)                                                 | 1117.64971 | 34 |      | Expt2 |
| IFVFEPPGVK              | 1 | 134288917                                                          | N-Term(iTRAQ4plex), K11(iTRAQ4plex)                                | 1517.89322 | 34 |      | Expt2 |
| AALAAQADCEVEQWNSDDPIPR  | 1 | 17933768                                                           | N-Term(iTRAQ4plex), C9(Methylthio)                                 | 2589.19333 | 34 |      | Expt2 |
| TFFLEALR                | 1 | 21313310                                                           | N-Term(iTRAQ4plex)                                                 | 1140.65434 | 34 |      | Expt2 |
| GPLTFTTR                | 1 | 29336026                                                           | N-Term(iTRAQ4plex)                                                 | 1036.59038 | 34 |      | Expt2 |
| GADDAADADTAINAEGGQNNSEK | 1 | 71040104:71040107:71040102:465759<br>40                            | N-Term(iTRAQ4plex), K25(iTRAQ4plex)                                | 2764.27182 | 34 |      | Expt2 |
| WOPGEEPAGSVQDSR         | 1 | 229577281:229577283                                                | N-Term(iTRAQ4plex)                                                 | 1885.91106 | 34 |      | Expt2 |
| VAMVAFWADADFSSR         | 1 | 167736365                                                          | N-Term(iTRAQ4plex)                                                 | 2000.96721 | 34 |      | Expt2 |
| SACGVCPR                | 1 | 149252605:149254156:82952419:1492<br>68895:149275043               | N-Term(iTRAQ4plex), C3(Methylthio), C6(Methylthio)                 | 1085.44646 | 34 |      | Expt2 |
| AVQQMLS                 | 2 | 149249414:149249416:149250447:149<br>250449                        | N-Term(iTRAQ4plex), M6(Oxidation)                                  | 1023.52934 | 34 |      | Expt2 |
| GCADNMTLTVSR            | 2 | 158635992                                                          | N-Term(iTRAQ4plex), C2(Methylthio), M6(Oxidation)                  | 1473.66362 | 34 |      | Expt2 |
| EMIDIYSTR               | 1 | 19705424                                                           | N-Term(iTRAQ4plex)                                                 | 1271.64495 | 34 |      | Expt2 |
| IQLLDLPGIEGAK           | 1 | 6681225                                                            | N-Term(iTRAQ4plex), K14(iTRAQ4plex)                                | 1768.08615 | 34 |      | Expt2 |
| DYFNVPYPLPK             | 1 | 68226731                                                           | N-Term(iTRAQ4plex), K11(iTRAQ4plex)                                | 1640.89885 | 34 |      | Expt2 |
| LWDDGIIDPVDR            | 1 | 73622267                                                           | N-Term(iTRAQ4plex)                                                 | 1658.85076 | 34 |      | Expt2 |
| LVILEGELER              | 1 | 11875203                                                           | N-Term(iTRAQ4plex)                                                 | 1314.77300 | 33 |      | Expt2 |
| IIFEDDR                 | 1 | 33468857                                                           | N-Term(iTRAQ4plex)                                                 | 1051.55522 | 33 |      | Expt2 |
| SLELNPNNCTALLR          | 1 | 23956176                                                           | N-Term(iTRAQ4plex), C9(Methylthio)                                 | 1747.89824 | 33 |      | Expt2 |
| LLSLOPPGMTVPSOAPR       | 1 | 148747331                                                          | N-Term(iTRAQ4plex), M9(Oxidation)                                  | 1952.08188 | 33 |      | Expt2 |
| LVTLEEFLR               | 1 | 153792449:194440700                                                | N-Term(iTRAQ4plex)                                                 | 1263.74687 | 33 |      | Expt2 |

|                                   |   |                                                                                                                                                                                                                                                                                                                                                                                 |                                                                      |            |    |      |       |
|-----------------------------------|---|---------------------------------------------------------------------------------------------------------------------------------------------------------------------------------------------------------------------------------------------------------------------------------------------------------------------------------------------------------------------------------|----------------------------------------------------------------------|------------|----|------|-------|
| YQDILVFR                          | 1 | 6678131                                                                                                                                                                                                                                                                                                                                                                         | N-Term(iTRAQ4plex)                                                   | 1197.67449 | 33 |      | Expt2 |
| CDLEDER                           | 1 | 21704066;149261508;15042957                                                                                                                                                                                                                                                                                                                                                     | N-Term(iTRAQ4plex), C1(Methylthio)                                   | 1069.44084 | 33 |      | Expt2 |
| LIPDDVMTR                         | 1 | 23956104                                                                                                                                                                                                                                                                                                                                                                        | N-Term(iTRAQ4plex)                                                   | 1203.65398 | 33 |      | Expt2 |
| LIESAEELIR                        | 1 | 31542563                                                                                                                                                                                                                                                                                                                                                                        | N-Term(iTRAQ4plex)                                                   | 1316.75408 | 33 |      | Expt2 |
| IADFLGAR                          | 2 | 6680908;94363446;149241266;149252149;116089355;116089349;157816961;161086911;120952698;112293260;33859570;31542366;31982490;160333476;171543837;34556205;7242173;161760634;161760636;6753380;18699998;189409171;46877057;34734056;120952633;6679233;171542819;7949020;14149637;224809542;6678617;224809552;157816935;120952641;16716469;224809525;157824204;171543841;124486698 | N-Term(iTRAQ4plex)                                                   | 1006.58202 | 33 |      | Expt2 |
| VANPCVN                           | 2 | 18252782                                                                                                                                                                                                                                                                                                                                                                        | N-Term(iTRAQ4plex), C5(Methylthio)                                   | 906.42961  | 33 |      | Expt2 |
| MLVVLLQGTR                        | 1 | 31981302;158966670                                                                                                                                                                                                                                                                                                                                                              | N-Term(iTRAQ4plex)                                                   | 1273.77922 | 33 |      | Expt2 |
| AVFDETYPDVPR                      | 2 | 34610207                                                                                                                                                                                                                                                                                                                                                                        | N-Term(iTRAQ4plex)                                                   | 1552.77580 | 33 | 3.97 | Expt2 |
| LGLCEDLR                          | 2 | 110735428;110735426                                                                                                                                                                                                                                                                                                                                                             | N-Term(iTRAQ4plex), C4(Methylthio)                                   | 1108.56230 | 33 |      | Expt2 |
| LGLGIDEDPTVDDTSAAVTEEMPPLEGDDTISR | 1 | 6754254                                                                                                                                                                                                                                                                                                                                                                         | N-Term(iTRAQ4plex), M23(Oxidation)                                   | 3735.67861 | 33 |      | Expt2 |
| MDELQLFR                          | 1 | 225543319;94408011                                                                                                                                                                                                                                                                                                                                                              | N-Term(iTRAQ4plex), M1(Oxidation)                                    | 1211.62407 | 33 |      | Expt2 |
| LDLLEDR                           | 1 | 6679891                                                                                                                                                                                                                                                                                                                                                                         | N-Term(iTRAQ4plex)                                                   | 1017.57097 | 33 |      | Expt2 |
| CLCLPGFSGPR                       | 2 | 183979966                                                                                                                                                                                                                                                                                                                                                                       | N-Term(iTRAQ4plex), C1(Methylthio), C3(Methylthio)                   | 1385.63262 | 33 |      | Expt2 |
| AGLSOSLFR                         | 1 | 170784813;170784811                                                                                                                                                                                                                                                                                                                                                             | N-Term(iTRAQ4plex)                                                   | 1251.68047 | 33 |      | Expt2 |
| TLVIEDDVR                         | 1 | 228008340                                                                                                                                                                                                                                                                                                                                                                       | N-Term(iTRAQ4plex)                                                   | 1203.67278 | 33 |      | Expt2 |
| TIVITLQDSIR                       | 1 | 149249577;47059073                                                                                                                                                                                                                                                                                                                                                              | N-Term(iTRAQ4plex)                                                   | 1390.80828 | 33 |      | Expt2 |
| TTDGYLLR                          | 1 | 94395665;149265827                                                                                                                                                                                                                                                                                                                                                              | N-Term(iTRAQ4plex)                                                   | 1082.59375 | 33 |      | Expt2 |
| FLYLGDDR                          | 1 | 6753960                                                                                                                                                                                                                                                                                                                                                                         | N-Term(iTRAQ4plex)                                                   | 1142.60112 | 33 |      | Expt2 |
| EALQDVEDENQ                       | 1 | 226874906                                                                                                                                                                                                                                                                                                                                                                       | N-Term(iTRAQ4plex)                                                   | 1433.65398 | 33 |      | Expt2 |
| EEIFGPMOILK                       | 1 | 6753036                                                                                                                                                                                                                                                                                                                                                                         | N-Term(iTRAQ4plex), M8(Oxidation), K12(iTRAQ4plex)                   | 1707.96677 | 33 |      | Expt2 |
| GLDPVEILQER                       | 1 | 76253779                                                                                                                                                                                                                                                                                                                                                                        | N-Term(iTRAQ4plex)                                                   | 1412.78728 | 33 |      | Expt2 |
| ALEIIPR                           | 1 | 238814391                                                                                                                                                                                                                                                                                                                                                                       | N-Term(iTRAQ4plex)                                                   | 955.60558  | 33 |      | Expt2 |
| VAVTEGCQPSR                       | 2 | 145966915                                                                                                                                                                                                                                                                                                                                                                       | N-Term(iTRAQ4plex), C7(Methylthio)                                   | 1336.65056 | 33 | 3.43 | Expt2 |
| EVATAIR                           | 1 | 149253083;82898647;149255335;82902507;94383782;94383784;149259263;63594466;149263154;149265803;94401827;94402540;94404463                                                                                                                                                                                                                                                       | N-Term(iTRAQ4plex)                                                   | 903.53722  | 33 |      | Expt2 |
| QVATAIR                           | 1 | 82993808;149269353                                                                                                                                                                                                                                                                                                                                                              | N-Term(iTRAQ4plex), Q1(Deamidated)                                   | 903.53722  | 33 |      | Expt2 |
| IETIEVMEDR                        | 2 | 82801284;94371439;149252089;82918363;82918359;82954743;149266199;82954739;149266543;149266545;82956957;51769129;149266569;82957137;94400765;149268214;149268216;37674277;157277969                                                                                                                                                                                              | N-Term(iTRAQ4plex), M7(Oxidation)                                    | 1394.69744 | 33 |      | Expt2 |
| FSCMCPQGYEVR                      | 1 | 149261823;164607147                                                                                                                                                                                                                                                                                                                                                             | N-Term(iTRAQ4plex), C3(Methylthio), M4(Oxidation), C5(Methylthio)    | 1770.72698 | 33 |      | Expt2 |
| APGIIPR                           | 1 | 6680748                                                                                                                                                                                                                                                                                                                                                                         | N-Term(iTRAQ4plex)                                                   | 867.55785  | 33 |      | Expt2 |
| TVTIVVR                           | 1 | 6753322                                                                                                                                                                                                                                                                                                                                                                         | N-Term(iTRAQ4plex)                                                   | 931.60918  | 33 |      | Expt2 |
| LIAGTSAYAR                        | 1 | 21312298                                                                                                                                                                                                                                                                                                                                                                        | N-Term(iTRAQ4plex)                                                   | 1279.75224 | 33 |      | Expt2 |
| SLSYLR                            | 8 | 6681143;160333308                                                                                                                                                                                                                                                                                                                                                               | N-Term(iTRAQ4plex)                                                   | 882.51933  | 33 |      | Expt2 |
| VLIQVGYEPLPTIGR                   | 2 | 9790055                                                                                                                                                                                                                                                                                                                                                                         | N-Term(iTRAQ4plex)                                                   | 1896.10855 | 33 |      | Expt2 |
| FFDEESYLLR                        | 1 | 6678145                                                                                                                                                                                                                                                                                                                                                                         | N-Term(iTRAQ4plex)                                                   | 1549.76848 | 33 |      | Expt2 |
| TIFWTSQLDR                        | 1 | 94394792;171543883                                                                                                                                                                                                                                                                                                                                                              | N-Term(iTRAQ4plex)                                                   | 1525.77947 | 33 |      | Expt2 |
| MPGAPETAPGDGAGAGR                 | 1 | 134949013                                                                                                                                                                                                                                                                                                                                                                       | N-Term(iTRAQ4plex), M1(Oxidation)                                    | 1671.79192 | 33 |      | Expt2 |
| VWQVTIGTR                         | 1 | 6680047                                                                                                                                                                                                                                                                                                                                                                         | N-Term(iTRAQ4plex)                                                   | 1203.69890 | 33 |      | Expt2 |
| VIMPCNWWWAR                       | 1 | 11968164                                                                                                                                                                                                                                                                                                                                                                        | N-Term(iTRAQ4plex), M3(Oxidation), C5(Methylthio)                    | 1580.76567 | 33 |      | Expt2 |
| VVFDVQR                           | 1 | 214010153                                                                                                                                                                                                                                                                                                                                                                       | N-Term(iTRAQ4plex)                                                   | 1093.61162 | 33 |      | Expt2 |
| MTVCDTNGPGVQCQR                   | 1 | 31560359                                                                                                                                                                                                                                                                                                                                                                        | N-Term(iTRAQ4plex), C4(Methylthio), C13(Methylthio), C15(Methylthio) | 1922.72942 | 33 |      | Expt2 |



|                        |   |                                                                   |                                                                    |            |    |      |       |
|------------------------|---|-------------------------------------------------------------------|--------------------------------------------------------------------|------------|----|------|-------|
| MLDMGFEPQIR            | 2 | 25141235;6753620;14861844;4006849<br>3;93587673;40068491;83816893 | N-Term(iTRAQ4plex)                                                 | 1480.74076 | 32 | 3.44 | Expt2 |
| EGELLVR                | 3 | 113199775                                                         | N-Term(iTRAQ4plex)                                                 | 959.56743  | 32 |      | Expt2 |
| EIIADVR                | 3 | 124487039                                                         | N-Term(iTRAQ4plex)                                                 | 959.56743  | 32 |      | Expt2 |
| AFPLLLR                | 1 | 123173870                                                         | N-Term(iTRAQ4plex)                                                 | 973.63561  | 32 |      | Expt2 |
| SQAQLIR                | 2 | 149252910;10946870;93277108                                       | N-Term(iTRAQ4plex)                                                 | 1041.65508 | 32 |      | Expt2 |
| SLELAR                 | 1 | 149253071;126090505;125490378                                     | N-Term(iTRAQ4plex)                                                 | 945.58360  | 32 |      | Expt2 |
| AVDFAER                | 1 | 6755358                                                           | N-Term(iTRAQ4plex)                                                 | 951.50347  | 32 |      | Expt2 |
| TVAQVLR                | 1 | 160415215                                                         | N-Term(iTRAQ4plex)                                                 | 1043.66692 | 32 |      | Expt2 |
| NLILVVR                | 2 | 51491845                                                          | N-Term(iTRAQ4plex)                                                 | 970.65428  | 32 |      | Expt2 |
| DLQLLR                 | 1 | 21312650                                                          | N-Term(iTRAQ4plex)                                                 | 901.56163  | 32 |      | Expt2 |
| NIAGLIR                | 1 | 71037393                                                          | N-Term(iTRAQ4plex), N1(Deamidated)                                 | 901.56163  | 32 |      | Expt2 |
| DILATNGVIHFIDELLIPDSAK | 1 | 6678321                                                           | N-Term(iTRAQ4plex), N6(Deamidated), K22(iTRAQ4plex)                | 2683.48862 | 32 |      | Expt2 |
| FGEGMQLAWNRR           | 1 | 82950147;82950149;149264086                                       | N-Term(iTRAQ4plex), M5(Oxidation)                                  | 1468.71208 | 32 |      | Expt2 |
| QSDQTIK                | 1 | 29789203;218156343                                                | N-Term(iTRAQ4plex), O1(Deamidated), O4(Deamidated), K7(iTRAQ4plex) | 1109.60454 | 32 |      | Expt2 |
| YSDFEWLR               | 1 | 31560433                                                          | N-Term(iTRAQ4plex)                                                 | 1259.61809 | 32 |      | Expt2 |
| GVAPLWMMR              | 1 | 149258501;19526818                                                | N-Term(iTRAQ4plex)                                                 | 1073.60405 | 32 |      | Expt2 |
| TIWLSLR                | 1 | 167736365                                                         | N-Term(iTRAQ4plex)                                                 | 945.62370  | 32 |      | Expt2 |
| ALDGDFTFENR            | 1 | 227116327                                                         | N-Term(iTRAQ4plex)                                                 | 1410.66472 | 32 |      | Expt2 |
| FITILCTR               | 1 | 149265291;22165408                                                | N-Term(iTRAQ4plex), C6(Methylthio)                                 | 1156.63530 | 32 |      | Expt2 |
| AGLAPLEVR              | 1 | 145966915                                                         | N-Term(iTRAQ4plex)                                                 | 1069.65276 | 32 |      | Expt2 |
| FTVVVLR                | 1 | 6679369                                                           | N-Term(iTRAQ4plex)                                                 | 977.62779  | 32 |      | Expt2 |
| TMQNTSDLDTAR           | 1 | 28395018                                                          | N-Term(iTRAQ4plex), M2(Oxidation)                                  | 1512.71672 | 32 |      | Expt2 |
| DEAEMSSWLR             | 1 | 55926127                                                          | N-Term(iTRAQ4plex)                                                 | 1367.63921 | 32 |      | Expt2 |
| GICFIR                 | 3 | 6678359                                                           | N-Term(iTRAQ4plex), C3(Methylthio)                                 | 898.47765  | 32 |      | Expt2 |
| TLAVLALR               | 1 | 33563290                                                          | N-Term(iTRAQ4plex)                                                 | 1000.66216 | 32 |      | Expt2 |
| VVLAPODVVVAR           | 1 | 30425042                                                          | N-Term(iTRAQ4plex)                                                 | 1409.85954 | 32 |      | Expt2 |
| ALLSAVTR               | 1 | 6753294;157951729;157951727                                       | N-Term(iTRAQ4plex)                                                 | 974.61479  | 32 |      | Expt2 |
| EEYPGIEISR             | 2 | 13384990                                                          | N-Term(iTRAQ4plex)                                                 | 1465.73039 | 32 | 3.60 | Expt2 |
| DVGNGNGSGNGGGAFFSOTR   | 1 | 119226255                                                         | N-Term(iTRAQ4plex), N6(Deamidated), N11(Deamidated)                | 2025.90433 | 32 |      | Expt2 |
| ALLDIGR                | 1 | 218156291;218156289                                               | N-Term(iTRAQ4plex)                                                 | 901.55400  | 31 |      | Expt2 |
| GLAGPMGPR              | 1 | 226423931                                                         | N-Term(iTRAQ4plex)                                                 | 999.55370  | 31 |      | Expt2 |
| NFEWVADR               | 1 | 13385434                                                          | N-Term(iTRAQ4plex)                                                 | 1180.58830 | 31 |      | Expt2 |
| ELAESDFASTFR           | 2 | 7242142;255760052                                                 | N-Term(iTRAQ4plex)                                                 | 1516.74480 | 31 | 3.86 | Expt2 |
| EQFVEFR                | 2 | 6680840;41282022                                                  | N-Term(iTRAQ4plex)                                                 | 1098.57305 | 31 |      | Expt2 |
| LAVSSAA                | 1 | 67906177                                                          | N-Term(iTRAQ4plex)                                                 | 762.44763  | 31 |      | Expt2 |
| WQDIQNDPR              | 1 | 189458814;124487025;39204553                                      | N-Term(iTRAQ4plex)                                                 | 1315.65276 | 31 |      | Expt2 |
| ALDOYLMEFNACR          | 1 | 22122667                                                          | N-Term(iTRAQ4plex), C12(Methylthio)                                | 1763.80901 | 31 |      | Expt2 |
| WVNDNCPSWNTVDPEVR      | 1 | 157951598                                                         | N-Term(iTRAQ4plex), C5(Methylthio)                                 | 2121.91826 | 31 |      | Expt2 |
| SVPPTLK                | 1 | 170932548                                                         | N-Term(iTRAQ4plex), K7(iTRAQ4plex)                                 | 1029.64392 | 31 |      | Expt2 |
| ETCTWF TDNYEQAR        | 1 | 13654268                                                          | N-Term(iTRAQ4plex), C3(Methylthio)                                 | 1953.82268 | 31 |      | Expt2 |
| YPEGSPEER              | 1 | 6678329                                                           | N-Term(iTRAQ4plex)                                                 | 1207.57500 | 31 |      | Expt2 |
| YTTPAGEVR              | 1 | 68226731                                                          | N-Term(iTRAQ4plex)                                                 | 1137.60210 | 31 |      | Expt2 |
| TSYTNLDGR              | 1 | 110626070                                                         | N-Term(iTRAQ4plex)                                                 | 1170.58965 | 31 |      | Expt2 |
| VILQELR                | 2 | 149251440;42741690;31543918;22682<br>3223                         | N-Term(iTRAQ4plex)                                                 | 1014.64067 | 31 |      | Expt2 |
| VFFDLMR                | 1 | 11612509;34328471                                                 | N-Term(iTRAQ4plex)                                                 | 1071.57756 | 31 |      | Expt2 |
| SMSFQGR                | 1 | 82950147;82950149;149264086                                       | N-Term(iTRAQ4plex)                                                 | 1069.55974 | 31 |      | Expt2 |
| ILVGTNLVR              | 1 | 13928670                                                          | N-Term(iTRAQ4plex)                                                 | 1128.72234 | 31 |      | Expt2 |
| TILDDLRL               | 1 | 226874935                                                         | N-Term(iTRAQ4plex)                                                 | 989.57689  | 31 |      | Expt2 |
| VIHQLR                 | 1 | 56118256                                                          | N-Term(iTRAQ4plex), O4(Deamidated)                                 | 1014.64470 | 31 |      | Expt2 |
| VNLEAAVR               | 1 | 110347487                                                         | N-Term(iTRAQ4plex)                                                 | 1014.64470 | 31 |      | Expt2 |
| ANLSLLR                | 2 | 149252953;23956214                                                | N-Term(iTRAQ4plex)                                                 | 930.58556  | 31 |      | Expt2 |
| EIQILLR                | 3 | 21489933                                                          | N-Term(iTRAQ4plex)                                                 | 1028.66081 | 31 |      | Expt2 |
| VCADLIR                | 1 | 13385652                                                          | N-Term(iTRAQ4plex), C2(Methylthio)                                 | 979.51714  | 31 |      | Expt2 |
| IPGSIIPPPLVR           | 1 | 149258842;30795222                                                | N-Term(iTRAQ4plex)                                                 | 1402.89507 | 31 |      | Expt2 |

|                       |   |                                              |                                                                                                    |            |  |    |      |       |
|-----------------------|---|----------------------------------------------|----------------------------------------------------------------------------------------------------|------------|--|----|------|-------|
| EYPDFNFVGR            | 1 | 226958440;226958438;11527388;149268447       | N-Term(iTRAQ4plex)                                                                                 | 1387.67681 |  | 31 |      | Expt2 |
| SILEDLR               | 2 | 33859809;66932952                            | N-Term(iTRAQ4plex)                                                                                 | 989.57482  |  | 31 |      | Expt2 |
| NGYGFVEFDSR           | 1 | 224967104                                    | N-Term(iTRAQ4plex), N1(Deamidated)                                                                 | 1564.70928 |  | 31 |      | Expt2 |
| CYQLEFGR              | 1 | 160707958                                    | N-Term(iTRAQ4plex), C1(Methylthio)                                                                 | 1205.55388 |  | 31 |      | Expt2 |
| LLLLAGVDR             | 1 | 30794138                                     | N-Term(iTRAQ4plex)                                                                                 | 1113.71440 |  | 31 |      | Expt2 |
| TVLTF                 | 2 | 6724311;31560625                             | N-Term(iTRAQ4plex)                                                                                 | 724.43334  |  | 31 |      | Expt2 |
| EQWIQDAEECDR          | 1 | 21539655                                     | N-Term(iTRAQ4plex), C10(Methylthio)                                                                | 1711.71953 |  | 31 |      | Expt2 |
| NLQLSIGVR             | 1 | 169234958;32129201                           | N-Term(iTRAQ4plex)                                                                                 | 1143.70049 |  | 31 |      | Expt2 |
| LQLVLR                | 2 | 160333863                                    | N-Term(iTRAQ4plex)                                                                                 | 984.66777  |  | 30 |      | Expt2 |
| DLDLLVEAK             | 1 | 25141235;6753620;14861844                    | N-Term(iTRAQ4plex), K10(iTRAQ4plex)                                                                | 1416.86341 |  | 30 |      | Expt2 |
| DLEEEAPVR             | 1 | 161016805                                    | N-Term(iTRAQ4plex)                                                                                 | 1201.61797 |  | 30 |      | Expt2 |
| EVEEEPGLR             | 1 | 157951706                                    | N-Term(iTRAQ4plex)                                                                                 | 1201.61797 |  | 30 |      | Expt2 |
| FSIASDYR              | 1 | 148747546                                    | N-Term(iTRAQ4plex)                                                                                 | 1102.56462 |  | 30 |      | Expt2 |
| DGVTGPGFTLSGCCQGR     | 1 | 19526946                                     | N-Term(iTRAQ4plex), C14(Methylthio), C15(Methylthio)                                               | 2074.89969 |  | 30 |      | Expt2 |
| AMNAF                 | 1 | 21105853                                     | N-Term(iTRAQ4plex)                                                                                 | 697.34241  |  | 30 |      | Expt2 |
| TLCCATVGR             | 1 | 118197277                                    | N-Term(iTRAQ4plex), C3(Methylthio), C4(Methylthio)                                                 | 1159.52007 |  | 30 |      | Expt2 |
| EGMNIVEAMER           | 1 | 6679439                                      | N-Term(iTRAQ4plex), M3(Oxidation), M9(Oxidation)                                                   | 1454.67937 |  | 30 |      | Expt2 |
| GLPQIAR               | 3 | 9790161                                      | N-Term(iTRAQ4plex)                                                                                 | 898.55980  |  | 30 |      | Expt2 |
| MMNNYVDCLPEEETNPK     | 4 | 9790161                                      | N-Term(iTRAQ4plex), M2(Oxidation), N4(Deamidated), N5(Deamidated), C8(Methylthio), K18(iTRAQ4plex) | 2491.05063 |  | 30 |      | Expt2 |
| LECVENCR              | 2 | 149251923;149255459;149265832                | N-Term(iTRAQ4plex), C3(Methylthio), C8(Methylthio)                                                 | 1298.55107 |  | 30 |      | Expt2 |
| YGCCPDVSAEAGPQAGCTR   | 2 | 158711721                                    | N-Term(iTRAQ4plex), C3(Methylthio), C4(Methylthio), C19(Methylthio)                                | 2351.91538 |  | 30 | 4.14 | Expt2 |
| QILLGPNLTSGGMPALPLPGK | 1 | 31982091                                     | N-Term(iTRAQ4plex), K24(iTRAQ4plex)                                                                | 2573.47666 |  | 30 |      | Expt2 |
| VGLIAR                | 1 | 6755358                                      | N-Term(iTRAQ4plex)                                                                                 | 843.55687  |  | 29 |      | Expt2 |
| GIPNVL                | 1 | 21539585                                     | N-Term(iTRAQ4plex)                                                                                 | 912.57225  |  | 29 |      | Expt2 |
| IFINLPR               | 1 | 31543902                                     | N-Term(iTRAQ4plex)                                                                                 | 1016.63902 |  | 29 |      | Expt2 |
| TSDLIVLGLPWK          | 1 | 21704096;56682931;56682933;56682935;56682929 | N-Term(iTRAQ4plex), K12(iTRAQ4plex)                                                                | 1629.98838 |  | 29 |      | Expt2 |
| IGVITNR               | 1 | 6677805                                      | N-Term(iTRAQ4plex)                                                                                 | 916.56938  |  | 29 |      | Expt2 |
| LTAALVLR              | 1 | 22507357                                     | N-Term(iTRAQ4plex)                                                                                 | 1000.66551 |  | 29 |      | Expt2 |
| YICGEAPDYDR           | 1 | 6754086                                      | N-Term(iTRAQ4plex), C3(Methylthio)                                                                 | 1491.63408 |  | 29 |      | Expt2 |
| APQVLVLAPTR           | 1 | 72384374                                     | N-Term(iTRAQ4plex)                                                                                 | 1308.81230 |  | 29 |      | Expt2 |
| AEVGSPL               | 1 | 168229148                                    | N-Term(iTRAQ4plex)                                                                                 | 816.45709  |  | 29 |      | Expt2 |
| TGIILR                | 1 | 169234958;32129201                           | N-Term(iTRAQ4plex)                                                                                 | 917.59398  |  | 29 |      | Expt2 |
| YLLPAILNPR            | 1 | 225543183                                    | N-Term(iTRAQ4plex)                                                                                 | 1313.81059 |  | 29 |      | Expt2 |
| NVPOEDICEDSDIDGDYR    | 1 | 6680598                                      | N-Term(iTRAQ4plex), C8(Methylthio)                                                                 | 2272.95920 |  | 29 |      | Expt2 |
| IVVVTAGVR             | 1 | 6678674                                      | N-Term(iTRAQ4plex)                                                                                 | 1057.68779 |  | 29 |      | Expt2 |
| ILIDIR                | 4 | 6755364;94397118                             | N-Term(iTRAQ4plex)                                                                                 | 886.58544  |  | 29 |      | Expt2 |
| GSLTLQQR              | 1 | 125628659                                    | N-Term(iTRAQ4plex)                                                                                 | 1031.63140 |  | 29 |      | Expt2 |
| GSFTCOCLPGYQK         | 1 | 149261823;164607147                          | N-Term(iTRAQ4plex), C5(Methylthio), C7(Methylthio), K13(iTRAQ4plex)                                | 1811.81906 |  | 29 |      | Expt2 |
| TLYGFGG               | 1 | 149263932;94378251                           | N-Term(iTRAQ4plex)                                                                                 | 858.44872  |  | 29 |      | Expt2 |
| SMGYDDLDYGMMSDYGTAR   | 1 | 146219835;146219830;146219849;146231979      | N-Term(iTRAQ4plex)                                                                                 | 2291.94248 |  | 28 |      | Expt2 |
| NALIP                 | 1 | 39652626                                     | N-Term(iTRAQ4plex)                                                                                 | 671.41846  |  | 28 |      | Expt2 |
| LANLIEI               | 1 | 10946680                                     | N-Term(iTRAQ4plex)                                                                                 | 929.58136  |  | 28 |      | Expt2 |
| TLVLPAIPLSSADK        | 2 | 23346525                                     | N-Term(iTRAQ4plex), K14(iTRAQ4plex)                                                                | 1713.04062 |  | 28 | 3.64 | Expt2 |
| YEMTYSGGGGGGGGGGTSTR  | 1 | 82950147;82950149                            | N-Term(iTRAQ4plex), M3(Oxidation)                                                                  | 2038.87139 |  | 28 |      | Expt2 |
| SLLDACEGR             | 1 | 117938332;117938334                          | N-Term(iTRAQ4plex), C6(Methylthio)                                                                 | 1153.54375 |  | 28 |      | Expt2 |
| EWYETR                | 1 | 149262636;118130981                          | N-Term(iTRAQ4plex)                                                                                 | 1027.49895 |  | 28 |      | Expt2 |
| IDEFEAM               | 1 | 149266483;157277948                          | N-Term(iTRAQ4plex), M7(Oxidation)                                                                  | 1014.45793 |  | 28 |      | Expt2 |
| IDEFESM               | 1 | 70778915                                     | N-Term(iTRAQ4plex)                                                                                 | 1014.45793 |  | 28 |      | Expt2 |
| CCTLPEODR             | 1 | 163310765                                    | N-Term(iTRAQ4plex), C1(Methylthio), C2(Methylthio)                                                 | 1300.52385 |  | 28 |      | Expt2 |
| WAWDQEEER             | 1 | 157311641                                    | N-Term(iTRAQ4plex)                                                                                 | 1392.63298 |  | 28 |      | Expt2 |
| GYFNEEMNR             | 2 | 37537522                                     | N-Term(iTRAQ4plex), N4(Deamidated)                                                                 | 1304.57170 |  | 28 | 3.72 | Expt2 |
| DLQOCR                | 1 | 6677833                                      | N-Term(iTRAQ4plex), C5(Methylthio)                                                                 | 939.41655  |  | 27 |      | Expt2 |
| ELLGQGLLR             | 1 | 149258001;22203755                           | N-Term(iTRAQ4plex)                                                                                 | 1255.78789 |  | 27 |      | Expt2 |

|                              |    |                                                                                                                                                                                                    |                                                                                   |            |  |    |      |      |       |
|------------------------------|----|----------------------------------------------------------------------------------------------------------------------------------------------------------------------------------------------------|-----------------------------------------------------------------------------------|------------|--|----|------|------|-------|
| GNLQCVCTGNR                  | 2  | 46849812                                                                                                                                                                                           | N-Term(iTRAQ4plex), C6(Methylthio), C8(Methylthio), N11(Deamidated)               | 1571.69402 |  | 27 |      | 3.43 | Expt2 |
| SEPDLYCDPR                   | 1  | 9790161                                                                                                                                                                                            | N-Term(iTRAQ4plex), C7(Methylthio)                                                | 1384.60161 |  | 27 |      |      | Expt2 |
| GLNLLIR                      | 1  | 23346557                                                                                                                                                                                           | N-Term(iTRAQ4plex)                                                                | 942.62328  |  | 27 |      |      | Expt2 |
| YTMGDAPDYDR                  | 1  | 6680121;28076911                                                                                                                                                                                   | N-Term(iTRAQ4plex), M3(Oxidation)                                                 | 1463.62700 |  | 26 |      |      | Expt2 |
| CLCPEGSLSTGR                 | 1  | 118197277                                                                                                                                                                                          | N-Term(iTRAQ4plex), C1(Methylthio), C3(Methylthio)                                | 1692.73699 |  | 26 |      |      | Expt2 |
| LGIIVVNR                     | 1  | 71061458;71061455                                                                                                                                                                                  | N-Term(iTRAQ4plex)                                                                | 1084.69805 |  | 25 |      |      | Expt2 |
| CECPNGMTLDATGR               | 1  | 118197277                                                                                                                                                                                          | N-Term(iTRAQ4plex), C1(Methylthio), C3(Methylthio), N5(Deamidated), M7(Oxidation) | 1720.66045 |  | 25 |      |      | Expt2 |
| SCAQNWIYE                    | 1  | 149262292;149274354                                                                                                                                                                                | N-Term(iTRAQ4plex), C2(Methylthio)                                                | 1303.55913 |  | 25 |      |      | Expt2 |
| GVEEEEEEGEMRE                | 1  | 94372795                                                                                                                                                                                           | N-Term(iTRAQ4plex), M11(Oxidation)                                                | 1697.70024 |  | 24 |      |      | Expt2 |
| VLFLIPK                      | 1  | 89337277;21703922;19526920                                                                                                                                                                         | N-Term(iTRAQ4plex), K7(iTRAQ4plex)                                                | 1117.77068 |  | 24 |      |      | Expt2 |
| IILR                         | 5  | 94404874;149270989;149271090;87299637;116063570;94374527;149262576;149268077;84490431;45433562;50345976;56797739;85861166;115270960;46309585;7363447;85701744;144922636;6754040;134053943;27369922 | N-Term(iTRAQ4plex)                                                                | 755.53075  |  | 23 |      |      | Expt2 |
| QLVALLR                      | 1  | 46195711                                                                                                                                                                                           | N-Term(iTRAQ4plex)                                                                | 956.63634  |  | 22 |      |      | Expt2 |
| LPNLLGR                      | 1  | 30519943                                                                                                                                                                                           | N-Term(iTRAQ4plex)                                                                | 926.58855  |  | 22 |      |      | Expt2 |
| IPVVVR                       | 1  | 46849708                                                                                                                                                                                           | N-Term(iTRAQ4plex)                                                                | 826.56120  |  | 21 |      |      | Expt2 |
| LQAL                         | 1  | 153281234                                                                                                                                                                                          | N-Term(iTRAQ4plex)                                                                | 701.46918  |  | 20 |      |      | Expt2 |
| VPLLVR                       | 2  | 29789239                                                                                                                                                                                           | N-Term(iTRAQ4plex)                                                                | 840.57988  |  | 19 |      |      | Expt2 |
| EGPDF                        | 2  | 33563266                                                                                                                                                                                           | N-Term(iTRAQ4plex)                                                                | 708.33148  |  | 19 |      |      | Expt2 |
| SCGL                         | 1  | 224922803                                                                                                                                                                                          | N-Term(iTRAQ4plex), C2(Methylthio)                                                | 626.27362  |  | 18 |      |      | Expt2 |
| IATHI                        | 5  | 165932331                                                                                                                                                                                          | N-Term(iTRAQ4plex)                                                                | 674.45874  |  | 17 |      |      | Expt2 |
| ICGGND                       | 1  | 149265356;149265358;160707921                                                                                                                                                                      | N-Term(iTRAQ4plex), C2(Methylthio)                                                | 768.31372  |  | 14 |      |      | Expt2 |
| ELEEIVQPIISK                 | 8  | 254540166                                                                                                                                                                                          | N-Term(iTRAQ4plex), K12(iTRAQ4plex)                                               | 1685.99993 |  |    | 1.35 | 4.73 | Expt2 |
| EVVENYPAYDLTER               | 6  | 253795498                                                                                                                                                                                          | N-Term(iTRAQ4plex)                                                                | 1905.89812 |  |    | 1.23 | 4.79 | Expt2 |
| GTTQIDPNWVIR                 | 2  | 239787900                                                                                                                                                                                          | N-Term(iTRAQ4plex)                                                                | 1543.83721 |  |    | 1.23 | 3.98 | Expt2 |
| VAPAPAGVFTDIPISNIR           | 6  | 257796245                                                                                                                                                                                          | N-Term(iTRAQ4plex)                                                                | 1982.12290 |  |    | 1.21 | 4.80 | Expt2 |
| FLEVOYLTGGLIEPDTGR           | 2  | 256000745;256418964;254675117;254675195;254675201;254675251;254675253;254675259;254675119;254675244;254675265;254675115                                                                            | N-Term(iTRAQ4plex)                                                                | 2249.19907 |  |    | 1.19 | 3.73 | Expt2 |
| SLNLDSHAEVK                  | 85 | 269914154                                                                                                                                                                                          | N-Term(iTRAQ4plex), N3(Deamidated), K12(iTRAQ4plex)                               | 1590.92571 |  |    | 1.18 | 5.74 | Expt2 |
| EYEAPELK                     | 2  | 268836255                                                                                                                                                                                          | N-Term(iTRAQ4plex), K10(iTRAQ4plex)                                               | 1542.83110 |  |    | 1.06 | 3.75 | Expt2 |
| TQLASWSDPTEGTVPVAGILDITETLEK | 4  | 256000745;256418964;254675117;254675195;254675201;254675251;254675253;254675259;254675119;254675244;254675265;254675115                                                                            | N-Term(iTRAQ4plex), K27(iTRAQ4plex)                                               | 3176.60813 |  |    | 1.01 | 6.93 | Expt2 |
| VLALPEPSAAPTLLR              | 12 | 256000745;256418964;254675117;254675195;254675201;254675251;254675253;254675259;254675119;254675244;254675265;254675115                                                                            | N-Term(iTRAQ4plex)                                                                | 1675.99150 |  |    | 1.00 | 4.42 | Expt2 |
| TIAECLADELINAAK              | 13 | 254675270                                                                                                                                                                                          | N-Term(iTRAQ4plex), C5(Methylthio), K15(iTRAQ4plex)                               | 1909.00578 |  |    | 0.99 | 7.14 | Expt2 |
| TLQALQIPAAK                  | 2  | 242332572                                                                                                                                                                                          | N-Term(iTRAQ4plex), K11(iTRAQ4plex)                                               | 1441.90825 |  |    | 0.99 | 4.22 | Expt2 |
| SYMKFLFVR                    | 1  | 76559942                                                                                                                                                                                           | N-Term(iTRAQ4plex), Y2(iTRAQ4plex), M3(Oxidation), K4(iTRAQ4plex)                 | 1638.93620 |  |    | 0.99 |      | Expt2 |
| OTNLENLDOAFSVAER             | 6  | 256000745;256418964;254675117;254675195;254675201;254675251;254675253;254675259;254675119;254675244;254675265;254675115                                                                            | N-Term(iTRAQ4plex)                                                                | 1978.99509 |  |    | 0.99 | 5.88 | Expt2 |
| VOEVEPEDFGVR                 | 2  | 244790233;244790299                                                                                                                                                                                | N-Term(iTRAQ4plex)                                                                | 1743.90691 |  |    | 0.99 | 4.46 | Expt2 |
| DHPEILENTEKIK                | 1  | 149256713                                                                                                                                                                                          | N-Term(iTRAQ4plex), N8(Deamidated), K11(iTRAQ4plex), K13(iTRAQ4plex)              | 1999.10857 |  |    | 0.99 |      | Expt2 |
| LVGILDILDEENR                | 2  | 261823961                                                                                                                                                                                          | N-Term(iTRAQ4plex)                                                                | 1642.91667 |  |    | 0.99 | 3.65 | Expt2 |
| FVEGLPINDFSR                 | 11 | 254540027                                                                                                                                                                                          | N-Term(iTRAQ4plex), N8(Deamidated)                                                | 1538.80120 |  |    | 0.99 | 4.25 | Expt2 |
| VLLSPDYLPAMR                 | 1  | 146231996                                                                                                                                                                                          | N-Term(iTRAQ4plex)                                                                | 1518.85234 |  |    | 0.98 |      | Expt2 |
| ALGGAGSGYTTGPEPLVSLLR        | 3  | 240120117;240120119                                                                                                                                                                                | N-Term(iTRAQ4plex)                                                                | 2160.17900 |  |    | 0.98 | 5.60 | Expt2 |
| FQOAVDAVEFLRR                | 1  | 119392066;119392074                                                                                                                                                                                | N-Term(iTRAQ4plex)                                                                | 1851.99259 |  |    | 0.98 |      | Expt2 |

|                              |    |                                                                                                                         |                                                      |            |  |  |      |      |       |
|------------------------------|----|-------------------------------------------------------------------------------------------------------------------------|------------------------------------------------------|------------|--|--|------|------|-------|
| LALVEENGIFELLR               | 3  | 242332585;242332587                                                                                                     | N-Term(iTRAQ4plex), N7(Deamidated)                   | 1760.99785 |  |  | 0.97 | 4.70 | Expt2 |
| NFQMIPGVVDGEFLPK             | 3  | 268839831                                                                                                               | N-Term(iTRAQ4plex), K16(iTRAQ4plex)                  | 2079.11863 |  |  | 0.97 | 4.12 | Expt2 |
| SQVMDEATALQLQEGLTSEEVTK      | 1  | 256000745;256418964;254675117;254675195;254675201;254675251;254675253;254675259;254675119;254675244;254675265;254675115 | N-Term(iTRAQ4plex), K24(iTRAQ4plex)                  | 2908.51023 |  |  |      | 8.48 | Expt2 |
| DLLOPEVAVALLEAQAGTHIIDPATSAR | 2  | 256000745;256418964;254675117;254675195;254675201;254675251;254675253;254675259;254675119;254675244;254675265;254675115 | N-Term(iTRAQ4plex)                                   | 3100.67722 |  |  |      | 8.28 | Expt2 |
| EIAEAYLGHVPTNAVITVPAYFNDSQR  | 10 | 124339829;124339826                                                                                                     | N-Term(iTRAQ4plex), N23(Deamidated)                  | 3120.57932 |  |  |      | 8.18 | Expt2 |
| VIPATDLSEQISTAGTEASGTGNMK    | 1  | 268836255                                                                                                               | N-Term(iTRAQ4plex), K25(iTRAQ4plex)                  | 2766.40976 |  |  |      | 7.54 | Expt2 |
| VWTSQVVEEYDLADDDINSR         | 2  | 6680710                                                                                                                 | N-Term(iTRAQ4plex), N18(Deamidated)                  | 2457.12815 |  |  |      | 7.45 | Expt2 |
| LYGSGPPTGEEDTSEKDEL          | 7  | 254540166                                                                                                               | N-Term(iTRAQ4plex), K18(iTRAQ4plex)                  | 2466.17740 |  |  |      | 7.38 | Expt2 |
| VPAQQLQEGALISQEEELQR         | 7  | 256000745;256418964;254675117;254675195;254675201;254675251;254675253;254675259;254675119;254675244;254675265;254675115 | N-Term(iTRAQ4plex)                                   | 2281.23117 |  |  |      | 7.19 | Expt2 |
| AFGAPGEAFSEPEEILFANSMGK      | 3  | 130502130                                                                                                               | N-Term(iTRAQ4plex), K23(iTRAQ4plex)                  | 2687.34281 |  |  |      | 7.02 | Expt2 |
| LEGSEVQLVEYEASAAGLIR         | 2  | 244791124                                                                                                               | N-Term(iTRAQ4plex)                                   | 2278.21067 |  |  |      | 6.97 | Expt2 |
| QLSSSVTGLNIEENCQR            | 5  | 242332572                                                                                                               | N-Term(iTRAQ4plex), C17(Methylthio)                  | 2298.08384 |  |  |      | 6.62 | Expt2 |
| EEVQAGVDAANSAQQYQR           | 3  | 242332572                                                                                                               | N-Term(iTRAQ4plex)                                   | 2179.04953 |  |  |      | 6.42 | Expt2 |
| EEELOOTLQOEONMLDR            | 2  | 256000745;256418964;254675117;254675195;254675201;254675251;254675253;254675259;254675119;254675244;254675265;254675115 | N-Term(iTRAQ4plex)                                   | 2276.10147 |  |  |      | 6.41 | Expt2 |
| SOIFSTASDNQPTVIK             | 5  | 254540166                                                                                                               | N-Term(iTRAQ4plex), K17(iTRAQ4plex)                  | 2125.14164 |  |  |      | 6.33 | Expt2 |
| VIVVGNPANTNCLTASK            | 12 | 254540027                                                                                                               | N-Term(iTRAQ4plex), C12(Methylthio), K17(iTRAQ4plex) | 2035.09531 |  |  |      | 6.32 | Expt2 |
| SAPLSLEYCAELGLDQDDLRL        | 1  | 261823961                                                                                                               | N-Term(iTRAQ4plex), C8(Methylthio)                   | 2398.14585 |  |  |      | 6.32 | Expt2 |
| GFFDPNTEENLTYQLMER           | 5  | 256000745;256418964;254675117;254675195;254675201;254675251;254675253;254675259;254675119;254675244;254675265;254675115 | N-Term(iTRAQ4plex)                                   | 2461.19199 |  |  |      | 6.30 | Expt2 |
| LTQSTFTLEQPLGQFK             | 8  | 247300693                                                                                                               | N-Term(iTRAQ4plex), K16(iTRAQ4plex)                  | 2126.18193 |  |  |      | 6.14 | Expt2 |
| SANAEDAQEFSDVER              | 7  | 254587904                                                                                                               | N-Term(iTRAQ4plex)                                   | 1811.81816 |  |  |      | 6.07 | Expt2 |
| GLFDEEMNEILDPSSDDTK          | 4  | 256000745;256418964;254675117;254675195;254675201;254675251;254675253;254675259;254675119;254675244;254675265;254675115 | N-Term(iTRAQ4plex), K19(iTRAQ4plex)                  | 2457.16715 |  |  |      | 6.05 | Expt2 |
| VQSGSESIVQEVDLR              | 4  | 256000745;256418964;254675117;254675195;254675201;254675251;254675253;254675259;254675119;254675244;254675265;254675115 | N-Term(iTRAQ4plex)                                   | 1953.00456 |  |  |      | 6.03 | Expt2 |
| VDQIQEIVTGNPTVIK             | 6  | 242332572                                                                                                               | N-Term(iTRAQ4plex), K16(iTRAQ4plex)                  | 2042.17801 |  |  |      | 6.02 | Expt2 |
| VIYQSLGAVQAGOLK              | 2  | 256000745;256418964;254675117;254675195;254675201;254675251;254675253;254675259;254675119;254675244;254675265;254675115 | N-Term(iTRAQ4plex), K16(iTRAQ4plex)                  | 1992.13547 |  |  |      | 6.01 | Expt2 |
| LGNDFMGITLASSQAVSNAR         | 3  | 255003777                                                                                                               | N-Term(iTRAQ4plex)                                   | 2196.12302 |  |  |      | 6.00 | Expt2 |
| FOPGETLIEITPATNEQEAHOR       | 2  | 242332572                                                                                                               | N-Term(iTRAQ4plex)                                   | 3012.47239 |  |  |      | 6.00 | Expt2 |
| YLYGTGAVAGVYLPGRSR           | 6  | 256000745;256418964;254675117;254675195;254675201;254675251;254675253;254675259;254675119;254675244;254675265;254675115 | N-Term(iTRAQ4plex)                                   | 1888.01409 |  |  |      | 5.94 | Expt2 |
| VQGSDSDEEWWATTR              | 1  | 255069795                                                                                                               | N-Term(iTRAQ4plex)                                   | 1835.91570 |  |  |      | 5.90 | Expt2 |
| AGVGAPVQVTLQSTQR             | 3  | 256000745;256418964;254675117;254675195;254675201;254675251;254675253;254675259;254675119;254675244;254675265;254675115 | N-Term(iTRAQ4plex)                                   | 1857.03142 |  |  |      | 5.86 | Expt2 |

|                                |    |                                                                                                                         |                                                     |            |  |  |  |      |       |
|--------------------------------|----|-------------------------------------------------------------------------------------------------------------------------|-----------------------------------------------------|------------|--|--|--|------|-------|
| DPYSGQSVSLFOALK                | 2  | 256000745;256418964;254675117;254675195;254675201;254675251;254675253;254675259;254675119;254675244;254675265;254675115 | N-Term(iTRAQ4plex), K15(iTRAQ4plex)                 | 1928.04416 |  |  |  | 5.83 | Expt2 |
| VNDSTMLGASGDYADFQYLK           | 1  | 254540082                                                                                                               | N-Term(iTRAQ4plex), K20(iTRAQ4plex)                 | 2483.20823 |  |  |  | 5.82 | Expt2 |
| TFAPEEISAMVLTK                 | 8  | 254540166                                                                                                               | N-Term(iTRAQ4plex), K14(iTRAQ4plex)                 | 1825.00920 |  |  |  | 5.75 | Expt2 |
| IAQNESELISDEAQQDMALR           | 1  | 261823961                                                                                                               | N-Term(iTRAQ4plex)                                  | 2334.13840 |  |  |  | 5.73 | Expt2 |
| AQAEAAQPVFNTLR                 | 3  | 256000745;256418964;254675117;254675195;254675201;254675251;254675253;254675259;254675119;254675244;254675265;254675115 | N-Term(iTRAQ4plex)                                  | 1716.91960 |  |  |  | 5.73 | Expt2 |
| MVPVSVQQSLAVFSQR               | 3  | 258547154;258547156;258547152                                                                                           | N-Term(iTRAQ4plex)                                  | 1920.05198 |  |  |  | 5.65 | Expt2 |
| FIQQTYPESGGEEAQYCR             | 7  | 258547154;258547156;258547152                                                                                           | N-Term(iTRAQ4plex), C17(Methylthio)                 | 2295.03238 |  |  |  | 5.63 | Expt2 |
| ELPLTADALTFAEYSK               | 3  | 242332585;242332587                                                                                                     | N-Term(iTRAQ4plex), K16(iTRAQ4plex)                 | 1993.11113 |  |  |  | 5.59 | Expt2 |
| DAPDGPVSEAEPEYTFEGLR           | 6  | 256000745;256418964;254675117;254675195;254675201;254675251;254675253;254675259;254675119;254675244;254675265;254675115 | N-Term(iTRAQ4plex)                                  | 2323.09439 |  |  |  | 5.56 | Expt2 |
| DVYEELLTQAEIQGNVNK             | 3  | 242332572                                                                                                               | N-Term(iTRAQ4plex), K18(iTRAQ4plex)                 | 2351.23789 |  |  |  | 5.51 | Expt2 |
| TGPTVEVSSGPMVFLR               | 4  | 269914118                                                                                                               | N-Term(iTRAQ4plex)                                  | 1832.91997 |  |  |  | 5.50 | Expt2 |
| EQTVSEILGSPGEAVR               | 3  | 269914118                                                                                                               | N-Term(iTRAQ4plex)                                  | 1803.92363 |  |  |  | 5.47 | Expt2 |
| ASSFVLALPELESR                 | 4  | 282398108                                                                                                               | N-Term(iTRAQ4plex)                                  | 1791.96428 |  |  |  | 5.37 | Expt2 |
| EGWQVEEADDWLR                  | 2  | 268836255                                                                                                               | N-Term(iTRAQ4plex)                                  | 1776.83428 |  |  |  | 5.36 | Expt2 |
| ILAIGLINEALDEGDAQK             | 3  | 242332572                                                                                                               | N-Term(iTRAQ4plex), K18(iTRAQ4plex)                 | 2171.22232 |  |  |  | 5.31 | Expt2 |
| FALGISAINAEVDSGDVGR            | 10 | 242332572                                                                                                               | N-Term(iTRAQ4plex)                                  | 2035.05754 |  |  |  | 5.30 | Expt2 |
| GLETIASDVVSLASK                | 2  | 257796245                                                                                                               | N-Term(iTRAQ4plex), K15(iTRAQ4plex)                 | 1778.02073 |  |  |  | 5.28 | Expt2 |
| ELGGAIDSGAAYVLEQASSHIGNSTQAAVR | 1  | 254826716;254826718                                                                                                     | N-Term(iTRAQ4plex)                                  | 3116.58176 |  |  |  | 5.27 | Expt2 |
| GEDEEDNNLEVR                   | 1  | 282398108                                                                                                               | N-Term(iTRAQ4plex)                                  | 1562.70879 |  |  |  | 5.25 | Expt2 |
| GFFDPNTEENLYLLOLMER            | 2  | 256000745;256418964;254675117;254675195;254675201;254675251;254675253;254675259;254675119;254675244;254675265;254675115 | N-Term(iTRAQ4plex), M17(Oxidation)                  | 2477.18387 |  |  |  | 5.23 | Expt2 |
| GEVAGOTLSLMEQLR                | 2  | 269954677;269954679                                                                                                     | N-Term(iTRAQ4plex)                                  | 1775.94596 |  |  |  | 5.23 | Expt2 |
| STSVVEQGGIQTVDOLIK             | 2  | 258547154;258547156;258547152                                                                                           | N-Term(iTRAQ4plex), K18(iTRAQ4plex)                 | 2190.22501 |  |  |  | 5.21 | Expt2 |
| DIQOWEYVPLGPFILK               | 1  | 240120112                                                                                                               | N-Term(iTRAQ4plex), K16(iTRAQ4plex)                 | 2178.18729 |  |  |  | 5.18 | Expt2 |
| LLDEEATDNDLR                   | 3  | 258547154;258547156;258547152                                                                                           | N-Term(iTRAQ4plex)                                  | 1676.81316 |  |  |  | 5.16 | Expt2 |
| VNQAIWLLCTGAR                  | 1  | 254675270                                                                                                               | N-Term(iTRAQ4plex), C9(Methylthio)                  | 1634.86650 |  |  |  | 5.11 | Expt2 |
| EVMQMLVELAK                    | 4  | 254553458                                                                                                               | N-Term(iTRAQ4plex), K11(iTRAQ4plex)                 | 1578.88982 |  |  |  | 5.11 | Expt2 |
| IPAYFITVHDPVPPGEDPDGR          | 1  | 255069795                                                                                                               | N-Term(iTRAQ4plex)                                  | 2507.26847 |  |  |  | 5.08 | Expt2 |
| LQNQIALDYLR                    | 2  | 256418964;254675117;254675195;254675201;254675251;254675253;254675259;254675119;254675244;254675265;254675115           | N-Term(iTRAQ4plex)                                  | 1589.91619 |  |  |  | 5.07 | Expt2 |
| SDGLSMFQQVPMVEIDGMK            | 3  | 31981724                                                                                                                | N-Term(iTRAQ4plex), M12(Oxidation), K19(iTRAQ4plex) | 2416.18155 |  |  |  | 5.06 | Expt2 |
| FAQPGSFYEYAMR                  | 4  | 255958247                                                                                                               | N-Term(iTRAQ4plex)                                  | 1839.85343 |  |  |  | 5.06 | Expt2 |
| YDDMLVPIIENPTEEK               | 2  | 258613873                                                                                                               | N-Term(iTRAQ4plex), K17(iTRAQ4plex)                 | 2293.19254 |  |  |  | 5.06 | Expt2 |
| IEDENDNYPLFTEAIYAFVPEGSR       | 1  | 133778947                                                                                                               | N-Term(iTRAQ4plex)                                  | 3062.44590 |  |  |  | 5.06 | Expt2 |
| NPNAMLVNLLEGLAPTYODVLYQAK      | 1  | 242332572                                                                                                               | N-Term(iTRAQ4plex), K25(iTRAQ4plex)                 | 3079.60439 |  |  |  | 5.06 | Expt2 |
| GAGPESEPIYFOTPEGVPEQPSFLK      | 1  | 110347545                                                                                                               | N-Term(iTRAQ4plex), K25(iTRAQ4plex)                 | 2992.53934 |  |  |  | 5.02 | Expt2 |
| GYFNEELSEILSDPSDDTK            | 1  | 82950147;82950149;149264086                                                                                             | N-Term(iTRAQ4plex), N4(Deamidated), K19(iTRAQ4plex) | 2448.17813 |  |  |  | 5.02 | Expt2 |
| AGGLDWPEATEGPPSR               | 4  | 242332585;242332587                                                                                                     | N-Term(iTRAQ4plex)                                  | 1783.87432 |  |  |  | 5.02 | Expt2 |
| YSVSEVQLEPAAASTYR              | 3  | 242332585;242332587                                                                                                     | N-Term(iTRAQ4plex)                                  | 2015.02226 |  |  |  | 5.01 | Expt2 |
| VFSEVELVSNMMSQSEPVITLK         | 1  | 161016833                                                                                                               | N-Term(iTRAQ4plex), K23(iTRAQ4plex)                 | 2877.52658 |  |  |  | 5.00 | Expt2 |
| EIEQSSISGVTAAYNR               | 3  | 242332572                                                                                                               | N-Term(iTRAQ4plex)                                  | 1868.94805 |  |  |  | 4.98 | Expt2 |
| EEEAQLDGLNASQIR                | 1  | 6755863                                                                                                                 | N-Term(iTRAQ4plex)                                  | 1929.99881 |  |  |  | 4.97 | Expt2 |
| DSQDAGGFGPEDR                  | 2  | 256000745;256418964;254675117;254675195;254675201;254675251;254675253;254675259;254675119;254675244;254675265;254675115 | N-Term(iTRAQ4plex)                                  | 1494.66069 |  |  |  | 4.97 | Expt2 |

|                               |    |                                                                                                                         |                                                      |            |  |      |       |
|-------------------------------|----|-------------------------------------------------------------------------------------------------------------------------|------------------------------------------------------|------------|--|------|-------|
| ASLQNLNLSASQAR                | 2  | 240120112                                                                                                               | N-Term(iTRAQ4plex)                                   | 1502.84270 |  | 4.97 | Expt2 |
| YLTESYGTGQDIDDR               | 2  | 261823961                                                                                                               | N-Term(iTRAQ4plex)                                   | 1876.86968 |  | 4.96 | Expt2 |
| SVTDYDFAPFLNNSPQONPAALPAR     | 5  | 261823961                                                                                                               | N-Term(iTRAQ4plex)                                   | 3005.49314 |  | 4.94 | Expt2 |
| TQNPMTVGTSLVGVK               | 3  | 254540082                                                                                                               | N-Term(iTRAQ4plex), K15(iTRAQ4plex)                  | 1820.01963 |  | 4.94 | Expt2 |
| LLDAQSLSTGGIVDPSK             | 3  | 256000745;256418964;254675117;254675195;254675201;254675251;254675253;254675259;254675119;254675244;254675265;254675115 | N-Term(iTRAQ4plex), K16(iTRAQ4plex)                  | 1902.08768 |  | 4.93 | Expt2 |
| GVLLEIEDLQANQFK               | 1  | 242332572                                                                                                               | N-Term(iTRAQ4plex), K15(iTRAQ4plex)                  | 2005.11821 |  | 4.92 | Expt2 |
| ITPSYVAFTPGEGER               | 16 | 254540166                                                                                                               | N-Term(iTRAQ4plex)                                   | 1710.88396 |  | 4.90 | Expt2 |
| NVIFEIGPTEEVGDFEVK            | 3  | 242332572                                                                                                               | N-Term(iTRAQ4plex), K18(iTRAQ4plex)                  | 2310.21421 |  | 4.89 | Expt2 |
| ALNENLODVEITIR                | 1  | 281485553                                                                                                               | N-Term(iTRAQ4plex)                                   | 1759.93303 |  | 4.88 | Expt2 |
| SGDAAIVDMVPGKPMCVESFSDYPPPLGR | 3  | 126032329                                                                                                               | N-Term(iTRAQ4plex), K13(iTRAQ4plex), C16(Methylthio) | 3272.58217 |  | 4.84 | Expt2 |
| YLGSSCIAGLVPVQGEPR            | 1  | 37537522                                                                                                                | N-Term(iTRAQ4plex), C7(Methylthio)                   | 2249.16043 |  | 4.84 | Expt2 |
| GGTGSVSGAGLEPVAR              | 2  | 242332585;242332587                                                                                                     | N-Term(iTRAQ4plex)                                   | 1558.83269 |  | 4.82 | Expt2 |
| MVPVSQQSLAVFSQR               | 2  | 258547154;258547156;258547152                                                                                           | N-Term(iTRAQ4plex), M1(Oxidation)                    | 1936.04367 |  | 4.77 | Expt2 |
| YSELTTLTSQYIK                 | 4  | 256000745;256418964;254675117;254675195;254675201;254675251;254675253;254675259;254675119;254675244;254675265;254675115 | N-Term(iTRAQ4plex), K13(iTRAQ4plex)                  | 1835.00644 |  | 4.74 | Expt2 |
| TSCPPPPQIPNTQVIETTVK          | 1  | 109627652                                                                                                               | N-Term(iTRAQ4plex), C3(Methylthio), K20(iTRAQ4plex)  | 2484.30869 |  | 4.71 | Expt2 |
| LEFGSFWELIGEAAK               | 2  | 254587904;254587910                                                                                                     | N-Term(iTRAQ4plex), K15(iTRAQ4plex)                  | 1985.06682 |  | 4.70 | Expt2 |
| GGAEGELOALR                   | 2  | 256000745;256418964;254675117;254675195;254675201;254675251;254675253;254675259;254675119;254675244;254675265;254675115 | N-Term(iTRAQ4plex)                                   | 1244.67302 |  | 4.65 | Expt2 |
| VNDSTMLGASGDYADFQYLK          | 1  | 254540082                                                                                                               | N-Term(iTRAQ4plex), M6(Oxidation), K20(iTRAQ4plex)   | 2499.20377 |  | 4.64 | Expt2 |
| YVVVTGITPTPLGEGK              | 4  | 261878543                                                                                                               | N-Term(iTRAQ4plex), K16(iTRAQ4plex)                  | 1919.11016 |  | 4.63 | Expt2 |
| ELOQAVALQMEQR                 | 3  | 254750698                                                                                                               | N-Term(iTRAQ4plex)                                   | 1616.85869 |  | 4.60 | Expt2 |
| SDOLTGLSLPLSEK                | 4  | 256000745;256418964;254675117;254675195;254675201;254675251;254675253;254675259;254675119;254675244;254675265;254675115 | N-Term(iTRAQ4plex), K15(iTRAQ4plex)                  | 1889.09038 |  | 4.60 | Expt2 |
| FVCSPDEVMDDTIDEQK             | 1  | 61657921                                                                                                                | N-Term(iTRAQ4plex), C3(Methylthio), K16(iTRAQ4plex)  | 2118.96402 |  | 4.60 | Expt2 |
| MFFDAELSQMQTHVSDTSVVLMSMDNRR  | 2  | 20911031                                                                                                                | N-Term(iTRAQ4plex), M10(Oxidation), Q11(Deamidated)  | 3263.50119 |  | 4.59 | Expt2 |
| ADMGGAATICSIAIVSAK            | 1  | 255069715                                                                                                               | N-Term(iTRAQ4plex), C10(Methylthio), K18(iTRAQ4plex) | 1970.99631 |  | 4.58 | Expt2 |
| DLDVAVLVGSMR                  | 8  | 254540027                                                                                                               | N-Term(iTRAQ4plex)                                   | 1515.83281 |  | 4.58 | Expt2 |
| SOQVMEATALQOEGLSIEEVTK        | 1  | 256000745;256418964;254675117;254675195;254675201;254675251;254675253;254675259;254675119;254675244;254675265;254675115 | N-Term(iTRAQ4plex), M4(Oxidation), K24(iTRAQ4plex)   | 2924.51072 |  | 4.57 | Expt2 |
| SLQECADAAEER                  | 1  | 256000790;256000792;256000796;256000788                                                                                 | N-Term(iTRAQ4plex)                                   | 1490.72197 |  | 4.56 | Expt2 |
| IAQNESELISDEAOGDMALR          | 1  | 261823961                                                                                                               | N-Term(iTRAQ4plex), M17(Oxidation)                   | 2350.13559 |  | 4.55 | Expt2 |
| SOVEEELFSVR                   | 5  | 256000745;256418964;254675117;254675195;254675201;254675251;254675253;254675259;254675119;254675244;254675265;254675115 | N-Term(iTRAQ4plex)                                   | 1466.76189 |  | 4.54 | Expt2 |
| STAALSGDTASCSPHMPFK           | 1  | 159110787                                                                                                               | N-Term(iTRAQ4plex), C12(Methylthio), K20(iTRAQ4plex) | 2331.17392 |  | 4.52 | Expt2 |
| SIITYVSSLYDAMPR               | 2  | 256000745;256418964;254675117;254675195;254675201;254675251;254675253;254675259;254675119;254675244;254675265;254675115 | N-Term(iTRAQ4plex)                                   | 1859.97214 |  | 4.51 | Expt2 |
| IVEANPLLEAFGNK                | 6  | 261823961                                                                                                               | N-Term(iTRAQ4plex), K15(iTRAQ4plex)                  | 1874.07053 |  | 4.51 | Expt2 |
| MLLDPMGGIVMTNDGNAILR          | 1  | 6753320                                                                                                                 | N-Term(iTRAQ4plex)                                   | 2275.17679 |  | 4.48 | Expt2 |
| AAYPDLENPLIVTPSQPK            | 1  | 262118273                                                                                                               | N-Term(iTRAQ4plex), K20(iTRAQ4plex)                  | 2466.34732 |  | 4.47 | Expt2 |
| NLATAYDNFVELVANLK             | 1  | 258547154;258547156;258547152                                                                                           | N-Term(iTRAQ4plex), K17(iTRAQ4plex)                  | 2183.20127 |  | 4.47 | Expt2 |
| AVENSSTAIGIR                  | 3  | 261824000                                                                                                               | N-Term(iTRAQ4plex)                                   | 1361.75237 |  | 4.46 | Expt2 |
| GSPDQYLAGLLSLAENNK            | 1  | 30424744                                                                                                                | N-Term(iTRAQ4plex), N16(Deamidated), K18(iTRAQ4plex) | 2179.17405 |  | 4.46 | Expt2 |
| TPAVSSFNANTATASTPATTVK        | 1  | 70909345                                                                                                                | N-Term(iTRAQ4plex), K24(iTRAQ4plex)                  | 2623.38736 |  | 4.46 | Expt2 |

|                           |   |                                                                                                                         |                                                      |            |  |  |  |      |       |
|---------------------------|---|-------------------------------------------------------------------------------------------------------------------------|------------------------------------------------------|------------|--|--|--|------|-------|
| AQAELEAQLQR               | 3 | 256000745;256418964;254675117;254675195;254675201;254675251;254675253;254675259;254675119;254675244;254675265;254675115 | N-Term(iTRAQ4plex)                                   | 1529.80364 |  |  |  | 4.45 | Expt2 |
| LFVGNLPPDITEEEMR          | 3 | 255958247                                                                                                               | N-Term(iTRAQ4plex)                                   | 2004.02446 |  |  |  | 4.45 | Expt2 |
| TDTDAELDLVSR              | 1 | 261878543                                                                                                               | N-Term(iTRAQ4plex)                                   | 1478.74675 |  |  |  | 4.42 | Expt2 |
| DFAYGEADPLIR              | 1 | 269954711                                                                                                               | N-Term(iTRAQ4plex)                                   | 1510.77068 |  |  |  | 4.40 | Expt2 |
| EAQAVPATLOELEATK          | 1 | 256000745;256418964;254675117;254675195;254675201;254675251;254675253;254675259;254675119;254675244;254675265;254675115 | N-Term(iTRAQ4plex), K16(iTRAQ4plex)                  | 1987.09531 |  |  |  | 4.39 | Expt2 |
| LTAEDLYEAR                | 5 | 256000745;256418964;254675117;254675195;254675201;254675251;254675253;254675259;254675119;254675244;254675265;254675115 | N-Term(iTRAQ4plex)                                   | 1324.68596 |  |  |  | 4.39 | Expt2 |
| TLINAEPPMIVVR             | 4 | 242332572                                                                                                               | N-Term(iTRAQ4plex)                                   | 1711.95769 |  |  |  | 4.39 | Expt2 |
| ATLEQPETDEVEQVSESNSIEELER | 1 | 257467552;257467554                                                                                                     | N-Term(iTRAQ4plex)                                   | 3005.41605 |  |  |  | 4.37 | Expt2 |
| YEVSSYTDQFSR              | 1 | 254675279;254675277                                                                                                     | N-Term(iTRAQ4plex)                                   | 1625.75603 |  |  |  | 4.34 | Expt2 |
| VGVOYSHEGTFEAIR           | 2 | 22203747                                                                                                                | N-Term(iTRAQ4plex)                                   | 1936.00412 |  |  |  | 4.34 | Expt2 |
| ITVDDADTVELCGALK          | 1 | 257467604                                                                                                               | N-Term(iTRAQ4plex), C13(Methylthio), K17(iTRAQ4plex) | 2096.09488 |  |  |  | 4.33 | Expt2 |
| LLDPEDVDPPOPEK            | 5 | 256000745;256418964;254675117;254675195;254675201;254675251;254675253;254675259;254675119;254675244;254675265;254675115 | N-Term(iTRAQ4plex), K15(iTRAQ4plex)                  | 1997.03191 |  |  |  | 4.33 | Expt2 |
| LOGPQTSAEVYR              | 2 | 257467604                                                                                                               | N-Term(iTRAQ4plex)                                   | 1492.78728 |  |  |  | 4.33 | Expt2 |
| FEPPAPLSYDSR              | 2 | 254675279;254675277                                                                                                     | N-Term(iTRAQ4plex)                                   | 1554.75615 |  |  |  | 4.32 | Expt2 |
| FEAAETLEEAMR              | 1 | 149263727;131412198;131412207;131412178                                                                                 | N-Term(iTRAQ4plex)                                   | 1611.78301 |  |  |  | 4.31 | Expt2 |
| VDQEIIMNIQER              | 1 | 58037109                                                                                                                | N-Term(iTRAQ4plex)                                   | 1631.85796 |  |  |  | 4.30 | Expt2 |
| FYAYNPLAGGLTCK            | 1 | 240120054                                                                                                               | N-Term(iTRAQ4plex), K15(iTRAQ4plex)                  | 1873.05008 |  |  |  | 4.30 | Expt2 |
| AEFFADVVPVAVR             | 2 | 251823872                                                                                                               | N-Term(iTRAQ4plex)                                   | 1464.79827 |  |  |  | 4.29 | Expt2 |
| ETMODLNR                  | 2 | 254540068                                                                                                               | N-Term(iTRAQ4plex)                                   | 1265.59307 |  |  |  | 4.27 | Expt2 |
| QONLASYDYVR               | 1 | 256000745;256418964;254675117;254675195;254675201;254675251;254675253;254675259;254675119;254675244;254675265;254675115 | N-Term(iTRAQ4plex)                                   | 1500.75994 |  |  |  | 4.26 | Expt2 |
| LPPGEYIVVPSTFEPNK         | 1 | 160333229                                                                                                               | N-Term(iTRAQ4plex), K17(iTRAQ4plex)                  | 2175.19718 |  |  |  | 4.24 | Expt2 |
| LLDAQLATGGIVDPR           | 2 | 256000745;256418964;254675117;254675195;254675201;254675251;254675253;254675259;254675119;254675244;254675265;254675115 | N-Term(iTRAQ4plex)                                   | 1682.95804 |  |  |  | 4.24 | Expt2 |
| LANIDEAMLQR               | 1 | 262118273                                                                                                               | N-Term(iTRAQ4plex)                                   | 1417.76042 |  |  |  | 4.24 | Expt2 |
| EIDPONDLTFLR              | 2 | 254540041                                                                                                               | N-Term(iTRAQ4plex)                                   | 1604.84172 |  |  |  | 4.24 | Expt2 |
| NDFEDVFNIPR               | 1 | 254692859                                                                                                               | N-Term(iTRAQ4plex)                                   | 1755.88848 |  |  |  | 4.23 | Expt2 |
| GTTASOMAQALALDK           | 1 | 6678097;255759941                                                                                                       | N-Term(iTRAQ4plex), K15(iTRAQ4plex)                  | 1793.96701 |  |  |  | 4.22 | Expt2 |
| GIVGVENVAELK              | 1 | 268836255                                                                                                               | N-Term(iTRAQ4plex), K12(iTRAQ4plex)                  | 1515.90203 |  |  |  | 4.19 | Expt2 |
| DPYTEQTISLFOAMK           | 2 | 256000745;256418964;254675117;254675195;254675201;254675251;254675253;254675259;254675119;254675244;254675265;254675115 | N-Term(iTRAQ4plex), K15(iTRAQ4plex)                  | 2060.06998 |  |  |  | 4.18 | Expt2 |
| QEEVSELOAR                | 1 | 256000745;256418964;254675117;254675195;254675201;254675251;254675253;254675259;254675119;254675244;254675265;254675115 | N-Term(iTRAQ4plex)                                   | 1495.75371 |  |  |  | 4.17 | Expt2 |
| EVLEMESAWR                | 2 | 256000745;256418964;254675117;254675195;254675201;254675251;254675253;254675259;254675119;254675244;254675265;254675115 | N-Term(iTRAQ4plex)                                   | 1393.69084 |  |  |  | 4.16 | Expt2 |
| VVSLDENFHLNELIPLLYIQDSK   | 1 | 148277039                                                                                                               | N-Term(iTRAQ4plex), K24(iTRAQ4plex)                  | 3084.68808 |  |  |  | 4.16 | Expt2 |

|                              |   |                                                                                                                         |                                                     |            |  |  |      |       |
|------------------------------|---|-------------------------------------------------------------------------------------------------------------------------|-----------------------------------------------------|------------|--|--|------|-------|
| AOVEQLTLTLR                  | 2 | 256000745;256418964;254675117;254675195;254675201;254675251;254675253;254675259;254675119;254675244;254675265;254675115 | N-Term(iTRAQ4plex)                                  | 1431.79375 |  |  | 4.15 | Expt2 |
| ILFAQSEPLVPSAGALAR           | 6 | 269914118                                                                                                               | N-Term(iTRAQ4plex)                                  | 1984.13860 |  |  | 4.15 | Expt2 |
| DPYSGNTISLFOAMK              | 4 | 256000745;256418964;254675117;254675195;254675201;254675251;254675253;254675259;254675119;254675244;254675265;254675115 | N-Term(iTRAQ4plex), K15(iTRAQ4plex)                 | 1960.01218 |  |  | 4.15 | Expt2 |
| IAQDLEMYGINYFEIK             | 1 | 149266483                                                                                                               | N-Term(iTRAQ4plex), K16(iTRAQ4plex)                 | 2235.16587 |  |  | 4.14 | Expt2 |
| NELESYAYSLK                  | 1 | 254540166                                                                                                               | N-Term(iTRAQ4plex), K11(iTRAQ4plex)                 | 1604.84868 |  |  | 4.14 | Expt2 |
| GOAPLETSLDLSLGDAFPDSGR       | 1 | 254675300                                                                                                               | N-Term(iTRAQ4plex)                                  | 2277.11734 |  |  | 4.12 | Expt2 |
| EIGLLTEEVLYGETK              | 1 | 261878543                                                                                                               | N-Term(iTRAQ4plex), K16(iTRAQ4plex)                 | 2111.14139 |  |  | 4.11 | Expt2 |
| ETECTYFSTPLLLGK              | 1 | 31982186                                                                                                                | N-Term(iTRAQ4plex), C4(Methylthio), K15(iTRAQ4plex) | 2036.03391 |  |  | 4.11 | Expt2 |
| NIQVDSPTYDISR                | 3 | 282398108                                                                                                               | N-Term(iTRAQ4plex)                                  | 1550.79558 |  |  | 4.11 | Expt2 |
| MLGADAVGMSVTPVIVIVAR         | 1 | 149265958;183074535;7305395                                                                                             | N-Term(iTRAQ4plex)                                  | 2060.10038 |  |  | 4.10 | Expt2 |
| DLDVAVLVGSMR                 | 3 | 254540027                                                                                                               | N-Term(iTRAQ4plex), M11(Oxidation)                  | 1531.82947 |  |  | 4.10 | Expt2 |
| TLSINEDEIEGFR                | 1 | 254588045;254588047                                                                                                     | N-Term(iTRAQ4plex)                                  | 1753.87444 |  |  | 4.10 | Expt2 |
| FYNELTEILVR                  | 1 | 258547154;258547156;258547152                                                                                           | N-Term(iTRAQ4plex)                                  | 1540.85222 |  |  | 4.09 | Expt2 |
| AQLETYISNLER                 | 1 | 7657112                                                                                                                 | N-Term(iTRAQ4plex)                                  | 1580.84136 |  |  | 4.08 | Expt2 |
| QVQVALETAOR                  | 1 | 256000745;256418964;254675117;254675195;254675201;254675251;254675253;254675259;254675119;254675244;254675265;254675115 | N-Term(iTRAQ4plex)                                  | 1386.78191 |  |  | 4.08 | Expt2 |
| LDIDPETITWQR                 | 1 | 261878543                                                                                                               | N-Term(iTRAQ4plex)                                  | 1630.85735 |  |  | 4.07 | Expt2 |
| LITSAEVVNDPMVGSK             | 1 | 268836255                                                                                                               | N-Term(iTRAQ4plex), M14(Oxidation), K18(iTRAQ4plex) | 2177.17984 |  |  | 4.06 | Expt2 |
| WQAVLAQTDVDR                 | 1 | 256000745;256418964;254675117;254675195;254675201;254675251;254675253;254675259;254675119;254675244;254675265;254675115 | N-Term(iTRAQ4plex)                                  | 1430.78935 |  |  | 4.06 | Expt2 |
| DIDIEDLEELDPDFIMAK           | 1 | 146219837                                                                                                               | N-Term(iTRAQ4plex), K18(iTRAQ4plex)                 | 2409.20487 |  |  | 4.05 | Expt2 |
| AVTSEIAVLQSR                 | 4 | 282398108                                                                                                               | N-Term(iTRAQ4plex)                                  | 1417.81597 |  |  | 4.04 | Expt2 |
| QOVTLQIGVVNEAPYTR            | 1 | 7305007                                                                                                                 | N-Term(iTRAQ4plex)                                  | 2060.12528 |  |  | 4.04 | Expt2 |
| FEELNMDLFR                   | 2 | 254540166                                                                                                               | N-Term(iTRAQ4plex)                                  | 1457.72588 |  |  | 4.02 | Expt2 |
| LAODFLDSQNL SAYNTR           | 2 | 244791124                                                                                                               | N-Term(iTRAQ4plex)                                  | 2100.04424 |  |  | 4.01 | Expt2 |
| GVVSDNCYPFSGR                | 1 | 270132817                                                                                                               | N-Term(iTRAQ4plex), C7(Methylthio)                  | 1590.71489 |  |  | 4.01 | Expt2 |
| EEVPEEAFPGAAPLLTQVPTVEAPEMMR | 2 | 23943828                                                                                                                | N-Term(iTRAQ4plex), M27(Oxidation), M28(Oxidation)  | 3285.61924 |  |  | 4.00 | Expt2 |
| DFTATFGPLDSLNTNR             | 1 | 251823978;251823980                                                                                                     | N-Term(iTRAQ4plex)                                  | 1798.91850 |  |  | 4.00 | Expt2 |
| VVNAAIATASSAPGESEEPVPSASR    | 1 | 55926127                                                                                                                | N-Term(iTRAQ4plex)                                  | 2640.36611 |  |  | 3.99 | Expt2 |
| MIYEAELSQMONQVSDTSVVLMSMDNNR | 1 | 29789317                                                                                                                | N-Term(iTRAQ4plex), M10(Oxidation)                  | 3262.51162 |  |  | 3.99 | Expt2 |
| DDPSGOMLLLLSDAR              | 3 | 256000745;256418964;254675117;254675195;254675201;254675251;254675253;254675259;254675119;254675244;254675265;254675115 | N-Term(iTRAQ4plex)                                  | 1774.91826 |  |  | 3.99 | Expt2 |
| EQQLSAGIIEELR                | 2 | 21703702                                                                                                                | N-Term(iTRAQ4plex)                                  | 1629.89568 |  |  | 3.99 | Expt2 |
| AVAQPLQLK                    | 2 | 239915968                                                                                                               | N-Term(iTRAQ4plex), Q4(Deamidated), K10(iTRAQ4plex) | 1313.81426 |  |  | 3.97 | Expt2 |
| EEGYDSVFSVVR                 | 1 | 247269309                                                                                                               | N-Term(iTRAQ4plex)                                  | 1530.75603 |  |  | 3.97 | Expt2 |
| QLAEEDLAQQR                  | 2 | 256000745;256418964;254675117;254675195;254675201;254675251;254675253;254675259;254675119;254675244;254675265;254675115 | N-Term(iTRAQ4plex)                                  | 1444.75200 |  |  | 3.96 | Expt2 |
| LEGWQGNPPPLYVGGSPTLK         | 1 | 269784707;269784709                                                                                                     | N-Term(iTRAQ4plex), K20(iTRAQ4plex)                 | 2428.31467 |  |  | 3.96 | Expt2 |
| SVDLAEYAPNLR                 | 1 | 149255994;149255996;149255998;49274606;254588045;281371356;254588047                                                    | N-Term(iTRAQ4plex)                                  | 1491.78862 |  |  | 3.95 | Expt2 |
| VGEPVALSEEER                 | 1 | 268837785                                                                                                               | N-Term(iTRAQ4plex)                                  | 1458.75786 |  |  | 3.95 | Expt2 |
| SSISGTEEEVEVFPDPEQK          | 1 | 157823829;157823865                                                                                                     | N-Term(iTRAQ4plex), K19(iTRAQ4plex)                 | 2397.15488 |  |  | 3.94 | Expt2 |



|                                 |   |                                                                                                                         |                                                                                    |            |  |  |  |      |       |
|---------------------------------|---|-------------------------------------------------------------------------------------------------------------------------|------------------------------------------------------------------------------------|------------|--|--|--|------|-------|
| DYELQLITYK                      | 2 | 256000745;256418964;254675117;254675195;254675201;254675251;254675253;254675259;254675119;254675244;254675265;254675115 | N-Term(iTRAQ4plex), K10(iTRAQ4plex)                                                | 1573.87920 |  |  |  | 3.94 | Expt2 |
| QLQSPAVYPVALSEK                 | 1 | 31982089                                                                                                                | N-Term(iTRAQ4plex), K15(iTRAQ4plex)                                                | 1918.08725 |  |  |  | 3.91 | Expt2 |
| NQLTSPNPENTVFDK                 | 2 | 254540166                                                                                                               | N-Term(iTRAQ4plex), K15(iTRAQ4plex)                                                | 1966.01201 |  |  |  | 3.91 | Expt2 |
| EQLWLANEGLITK                   | 2 | 242332572                                                                                                               | N-Term(iTRAQ4plex), K13(iTRAQ4plex)                                                | 1803.03403 |  |  |  | 3.91 | Expt2 |
| VTLVQTLLEIQR                    | 2 | 256000745;256418964;254675117;254675195;254675201;254675251;254675253;254675259;254675119;254675244;254675265;254675115 | N-Term(iTRAQ4plex)                                                                 | 1443.86955 |  |  |  | 3.89 | Expt2 |
| GWLYYEAGOR                      | 1 | 256000745;256418964;254675117;254675195;254675201;254675251;254675253;254675259;254675119;254675244;254675265;254675115 | N-Term(iTRAQ4plex)                                                                 | 1386.69243 |  |  |  | 3.88 | Expt2 |
| SLAAEEEAAR                      | 2 | 256000745;256418964;254675117;254675195;254675201;254675251;254675253;254675259;254675119;254675244;254675265;254675115 | N-Term(iTRAQ4plex)                                                                 | 1190.61577 |  |  |  | 3.88 | Expt2 |
| DGDLNPLVLYNGAVK                 | 1 | 19526463                                                                                                                | N-Term(iTRAQ4plex), N11(Deamidated), K15(iTRAQ4plex)                               | 1892.99210 |  |  |  | 3.88 | Expt2 |
| TIQMEPQFGGVPCEPVQR              | 1 | 21704174                                                                                                                | N-Term(iTRAQ4plex), M4(Oxidation), C13(Methylthio)                                 | 2323.10410 |  |  |  | 3.88 | Expt2 |
| NRGPOSPSAGVHGAPAFMFR            | 1 | 82999381                                                                                                                | N-Term(iTRAQ4plex), M20(Oxidation)                                                 | 2362.17368 |  |  |  | 3.87 | Expt2 |
| ALQALDELK                       | 6 | 256000745;256418964;254675117;254675195;254675201;254675251;254675253;254675259;254675119;254675244;254675265;254675115 | N-Term(iTRAQ4plex)                                                                 | 1172.67607 |  |  |  | 3.86 | Expt2 |
| YGLSAAAAAAAAAAVEQR              | 2 | 149263391;22003884                                                                                                      | N-Term(iTRAQ4plex)                                                                 | 1877.00772 |  |  |  | 3.86 | Expt2 |
| LOALDNEAGRRPAMEPENGSLDLGGDAAGR  | 1 | 160333923                                                                                                               | N-Term(iTRAQ4plex), M15(Oxidation), N19(Deamidated)                                | 3141.49363 |  |  |  | 3.86 | Expt2 |
| FTASAGIQVGGDDTLVTNPK            | 1 | 149253386                                                                                                               | N-Term(iTRAQ4plex), Q8(Deamidated), N18(Deamidated), K20(iTRAQ4plex)               | 2323.21872 |  |  |  | 3.86 | Expt2 |
| LSVLGAITSVQQR                   | 1 | 124286826                                                                                                               | N-Term(iTRAQ4plex)                                                                 | 1515.89665 |  |  |  | 3.85 | Expt2 |
| IFYPETTDIYDR                    | 2 | 242332572                                                                                                               | N-Term(iTRAQ4plex)                                                                 | 1676.82915 |  |  |  | 3.85 | Expt2 |
| ASQAPSSQLLYDLK                  | 1 | 261878543                                                                                                               | N-Term(iTRAQ4plex), K15(iTRAQ4plex)                                                | 1956.07541 |  |  |  | 3.85 | Expt2 |
| QAVDVSPLR                       | 2 | 254675270                                                                                                               | N-Term(iTRAQ4plex)                                                                 | 1128.64958 |  |  |  | 3.85 | Expt2 |
| AVQGGAAAPVVGAVQVPGMPPMQAPR      | 1 | 149263421;114052541                                                                                                     | N-Term(iTRAQ4plex), M20(Oxidation), M23(Oxidation)                                 | 2826.49143 |  |  |  | 3.85 | Expt2 |
| DMSPLPESEVTLGK                  | 1 | 148747189                                                                                                               | N-Term(iTRAQ4plex), K14(iTRAQ4plex)                                                | 1790.95090 |  |  |  | 3.84 | Expt2 |
| SICEVLDLDR                      | 2 | 253795498                                                                                                               | N-Term(iTRAQ4plex), C3(Methylthio)                                                 | 1366.68462 |  |  |  | 3.84 | Expt2 |
| LFVGNLPPDIITEEMR                | 3 | 255958247                                                                                                               | N-Term(iTRAQ4plex), M15(Oxidation)                                                 | 2020.02445 |  |  |  | 3.83 | Expt2 |
| QELMASMEEAR                     | 1 | 256000745;256418964;254675117;254675195;254675201;254675251;254675253;254675259;254675119;254675244;254675265;254675115 | N-Term(iTRAQ4plex)                                                                 | 1438.67986 |  |  |  | 3.82 | Expt2 |
| DMFOETMEAMR                     | 2 | 114326446                                                                                                               | N-Term(iTRAQ4plex)                                                                 | 1532.66765 |  |  |  | 3.82 | Expt2 |
| LLEAOACTGGIHPSTGER              | 1 | 256000745;256418964;254675117;254675195;254675201;254675251;254675253;254675259;254675119;254675244;254675265;254675115 | N-Term(iTRAQ4plex), C7(Methylthio)                                                 | 2121.04941 |  |  |  | 3.82 | Expt2 |
| LPEGQLPEALPAQAAGAGLK            | 1 | 149263538                                                                                                               | N-Term(iTRAQ4plex), K23(iTRAQ4plex)                                                | 2490.38248 |  |  |  | 3.81 | Expt2 |
| QGLETEVAELR                     | 1 | 113195686                                                                                                               | N-Term(iTRAQ4plex)                                                                 | 1388.75054 |  |  |  | 3.80 | Expt2 |
| EFGASECISPODFSK                 | 1 | 31982511                                                                                                                | N-Term(iTRAQ4plex), C7(Methylthio), K15(iTRAQ4plex)                                | 1978.91709 |  |  |  | 3.80 | Expt2 |
| QFGASECISPODFSK                 | 1 | 82892669                                                                                                                | N-Term(iTRAQ4plex), Q1(Deamidated), C7(Methylthio), K15(iTRAQ4plex)                | 1978.91709 |  |  |  | 3.80 | Expt2 |
| EQWANLEQLSAIR                   | 1 | 117938332;117938334                                                                                                     | N-Term(iTRAQ4plex), N5(Deamidated), Q8(Deamidated)                                 | 1703.85771 |  |  |  | 3.80 | Expt2 |
| VPSTEAELASSLMLFEK               | 1 | 116089273                                                                                                               | N-Term(iTRAQ4plex), M14(Oxidation), K19(iTRAQ4plex)                                | 2284.20005 |  |  |  | 3.80 | Expt2 |
| ALEEFQSEVSSCR                   | 1 | 33563297                                                                                                                | N-Term(iTRAQ4plex), C12(Methylthio)                                                | 1674.75859 |  |  |  | 3.79 | Expt2 |
| ETLGTGAFSEVVLAEK                | 1 | 79750129                                                                                                                | N-Term(iTRAQ4plex), K17(iTRAQ4plex)                                                | 2068.08268 |  |  |  | 3.79 | Expt2 |
| FPPLGGGGIGYEANPGVPPATMSGMMGSDMR | 1 | 149252953;23956214                                                                                                      | N-Term(iTRAQ4plex), M23(Oxidation), M27(Oxidation), M28(Oxidation), M32(Oxidation) | 3403.52529 |  |  |  | 3.79 | Expt2 |

|                                |   |                                                                                                                         |                                                                     |            |  |  |      |       |
|--------------------------------|---|-------------------------------------------------------------------------------------------------------------------------|---------------------------------------------------------------------|------------|--|--|------|-------|
| SLLAQWLSLR                     | 3 | 256000745;256418964;254675117;254675195;254675201;254675251;254675253;254675259;254675119;254675244;254675265;254675115 | N-Term(iTRAQ4plex)                                                  | 1304.74443 |  |  | 3.78 | Expt2 |
| QIIQONPSLLPALQOIGR             | 1 | 171906578                                                                                                               | N-Term(iTRAQ4plex)                                                  | 2274.34604 |  |  | 3.77 | Expt2 |
| GVPTGFVLPPIR                   | 3 | 261878543                                                                                                               | N-Term(iTRAQ4plex)                                                  | 1299.79241 |  |  | 3.76 | Expt2 |
| EGVLGQVPLAPPQGPAPPAPAR         | 1 | 92110037                                                                                                                | N-Term(iTRAQ4plex)                                                  | 2447.35727 |  |  | 3.76 | Expt2 |
| SLYDDIEAGETTLPGDAIHTMIENLOPETK | 1 | 111074529                                                                                                               | N-Term(iTRAQ4plex), M21(Oxidation), K30(iTRAQ4plex)                 | 3605.79165 |  |  | 3.74 | Expt2 |
| VPEANSSWMDTVIR                 | 1 | 257796245                                                                                                               | N-Term(iTRAQ4plex)                                                  | 1748.87541 |  |  | 3.74 | Expt2 |
| WIDETPPVDQPSR                  | 1 | 254587947                                                                                                               | N-Term(iTRAQ4plex)                                                  | 1683.84929 |  |  | 3.74 | Expt2 |
| GYFDEEMNR                      | 1 | 256000745;256418964;254675117;254675195;254675201;254675251;254675253;254675259;254675119;254675244;254675265;254675115 | N-Term(iTRAQ4plex)                                                  | 1304.57170 |  |  | 3.72 | Expt2 |
| FLOTAENILPLETTQELPPK           | 1 | 27734136                                                                                                                | N-Term(iTRAQ4plex), K20(iTRAQ4plex)                                 | 2570.43399 |  |  | 3.72 | Expt2 |
| YVAVMPPHIGDQPLTGAYTVTLDR       | 1 | 21450325                                                                                                                | N-Term(iTRAQ4plex)                                                  | 2815.46152 |  |  | 3.72 | Expt2 |
| VWDYETGDFER                    | 1 | 7305363                                                                                                                 | N-Term(iTRAQ4plex)                                                  | 1560.71172 |  |  | 3.72 | Expt2 |
| FIIGESOAGEPTOTVMPGQVMR         | 1 | 269973917;269973915                                                                                                     | N-Term(iTRAQ4plex), M22(Oxidation)                                  | 2664.33927 |  |  | 3.72 | Expt2 |
| AAAAGALAPGPLDLAAR              | 1 | 84794548                                                                                                                | N-Term(iTRAQ4plex)                                                  | 1746.99936 |  |  | 3.71 | Expt2 |
| VPLPLSPTMQAGTIAR               | 1 | 257796245                                                                                                               | N-Term(iTRAQ4plex)                                                  | 1883.05632 |  |  | 3.71 | Expt2 |
| ALDIDFATR                      | 2 | 258759938                                                                                                               | N-Term(iTRAQ4plex)                                                  | 1165.63432 |  |  | 3.70 | Expt2 |
| NIYWNTLNSGR                    | 2 | 269973935                                                                                                               | N-Term(iTRAQ4plex), N1(Deamidated)                                  | 1482.74333 |  |  | 3.69 | Expt2 |
| CILDSELEGR                     | 1 | 240120117;240120119                                                                                                     | N-Term(iTRAQ4plex), C1(Methylthio)                                  | 1437.72051 |  |  | 3.69 | Expt2 |
| FGSLLPIHPVTSG                  | 2 | 254587947                                                                                                               | N-Term(iTRAQ4plex)                                                  | 1468.83318 |  |  | 3.68 | Expt2 |
| AASLLANLWQYSK                  | 1 | 242332585;242332587                                                                                                     | N-Term(iTRAQ4plex), K14(iTRAQ4plex)                                 | 1840.02536 |  |  | 3.67 | Expt2 |
| ATFYGEQVDYYK                   | 1 | 242332572                                                                                                               | N-Term(iTRAQ4plex), K12(iTRAQ4plex)                                 | 1771.88677 |  |  | 3.67 | Expt2 |
| EASMVITESPAALQLR               | 1 | 7710018                                                                                                                 | N-Term(iTRAQ4plex), M4(Oxidation)                                   | 1875.99936 |  |  | 3.67 | Expt2 |
| LAEDEAFOR                      | 2 | 256000745;256418964;254675117;254675195;254675201;254675251;254675253;254675259;254675119;254675244;254675265;254675115 | N-Term(iTRAQ4plex)                                                  | 1222.61638 |  |  | 3.67 | Expt2 |
| FAQPGSFYEYAMR                  | 1 | 255958247                                                                                                               | N-Term(iTRAQ4plex), M13(Oxidation)                                  | 1855.84769 |  |  | 3.67 | Expt2 |
| ALNPLEDWLR                     | 1 | 255069795                                                                                                               | N-Term(iTRAQ4plex)                                                  | 1370.75310 |  |  | 3.66 | Expt2 |
| ELPDLEDLMK                     | 2 | 255003777                                                                                                               | N-Term(iTRAQ4plex), K10(iTRAQ4plex)                                 | 1490.80425 |  |  | 3.66 | Expt2 |
| AGLLALEFYTPEANWR               | 1 | 244791124                                                                                                               | N-Term(iTRAQ4plex)                                                  | 2066.08354 |  |  | 3.65 | Expt2 |
| ALSEIAGITLPHYDLDQVR            | 1 | 229892318                                                                                                               | N-Term(iTRAQ4plex)                                                  | 2219.20914 |  |  | 3.65 | Expt2 |
| GPQPNYESPYPGAPITFGSQPGPPQPLPK  | 1 | 269954698;269954700                                                                                                     | N-Term(iTRAQ4plex), K29(iTRAQ4plex)                                 | 3290.66123 |  |  | 3.65 | Expt2 |
| EIDCLSPEAQR                    | 1 | 162417949;6678722                                                                                                       | N-Term(iTRAQ4plex), C4(Methylthio)                                  | 1450.67754 |  |  | 3.65 | Expt2 |
| GAGTGGLGLAVEGPSEAK             | 1 | 125347376                                                                                                               | N-Term(iTRAQ4plex), K18(iTRAQ4plex)                                 | 1859.01999 |  |  | 3.65 | Expt2 |
| QVEALLPCLR                     | 1 | 240120054                                                                                                               | N-Term(iTRAQ4plex), C9(Methylthio)                                  | 1460.77422 |  |  | 3.64 | Expt2 |
| VGSPFDLMVSGNR                  | 1 | 23346525                                                                                                                | N-Term(iTRAQ4plex)                                                  | 1522.78264 |  |  | 3.63 | Expt2 |
| GSSGVLTAAVLR                   | 1 | 10242373                                                                                                                | N-Term(iTRAQ4plex)                                                  | 1331.77458 |  |  | 3.63 | Expt2 |
| GGELYVTDTEAR                   | 3 | 256000745;256418964;254675117;254675195;254675201;254675251;254675253;254675259;254675119;254675244;254675265;254675115 | N-Term(iTRAQ4plex)                                                  | 1454.72869 |  |  | 3.62 | Expt2 |
| TILPAAQDVYYR                   | 2 | 282398108                                                                                                               | N-Term(iTRAQ4plex)                                                  | 1624.88310 |  |  | 3.61 | Expt2 |
| MFGVPPVVAVNVFK                 | 1 | 261878543                                                                                                               | N-Term(iTRAQ4plex), K14(iTRAQ4plex)                                 | 1794.06113 |  |  | 3.60 | Expt2 |
| SIMEQFNPALENLYLGNYYLR          | 1 | 29243932                                                                                                                | N-Term(iTRAQ4plex), M3(Oxidation), N12(Deamidated), N18(Deamidated) | 2760.37717 |  |  | 3.59 | Expt2 |
| VAPPLTQIQIQK                   | 1 | 6753138                                                                                                                 | N-Term(iTRAQ4plex), K14(iTRAQ4plex)                                 | 1778.07969 |  |  | 3.59 | Expt2 |
| DLGQVAQAEER                    | 1 | 268838020                                                                                                               | N-Term(iTRAQ4plex)                                                  | 1430.73772 |  |  | 3.59 | Expt2 |
| SVENAVCVLR                     | 2 | 242332585;242332587                                                                                                     | N-Term(iTRAQ4plex), C7(Methylthio)                                  | 1279.65911 |  |  | 3.58 | Expt2 |
| QLLEELAR                       | 1 | 256000745;256418964;254675117;254675195;254675201;254675251;254675253;254675259;254675119;254675244;254675265;254675115 | N-Term(iTRAQ4plex)                                                  | 1244.69695 |  |  | 3.57 | Expt2 |
| GEFITTVQOR                     | 2 | 254540027                                                                                                               | N-Term(iTRAQ4plex)                                                  | 1322.71965 |  |  | 3.57 | Expt2 |
| GAIVPAQEVPPPTVPMDSYWAR         | 1 | 29293809                                                                                                                | N-Term(iTRAQ4plex), M16(Oxidation)                                  | 2541.29734 |  |  | 3.57 | Expt2 |

|                               |   |                                                                                                                         |                                                                                      |            |  |  |      |       |
|-------------------------------|---|-------------------------------------------------------------------------------------------------------------------------|--------------------------------------------------------------------------------------|------------|--|--|------|-------|
| IYGADIELLEPAQNK               | 1 | 261878543                                                                                                               | N-Term(iTRAQ4plex), K16(iTRAQ4plex)                                                  | 2077.11582 |  |  | 3.56 | Expt2 |
| ALQTTYGTNAPR                  | 1 | 240120054                                                                                                               | N-Term(iTRAQ4plex)                                                                   | 1436.76079 |  |  | 3.56 | Expt2 |
| NAEPLINLDVNNPDFK              | 1 | 13386026;149251291                                                                                                      | N-Term(iTRAQ4plex), K16(iTRAQ4plex)                                                  | 2101.12168 |  |  | 3.56 | Expt2 |
| MAGETPELTLEQPPDASTK           | 1 | 6680770                                                                                                                 | N-Term(iTRAQ4plex), K20(iTRAQ4plex)                                                  | 2431.22184 |  |  | 3.55 | Expt2 |
| OLEMSAEAR                     | 1 | 256000745;256418964;254675117;254675195;254675201;254675251;254675253;254675259;254675119;254675244;254675265;254675115 | N-Term(iTRAQ4plex)                                                                   | 1307.63506 |  |  | 3.55 | Expt2 |
| INESDPEYLR                    | 1 | 31542111;255759888;255759890                                                                                            | N-Term(iTRAQ4plex)                                                                   | 1379.69512 |  |  | 3.54 | Expt2 |
| GSPMEISLPIALSK                | 1 | 116734870                                                                                                               | N-Term(iTRAQ4plex), K14(iTRAQ4plex)                                                  | 1731.00034 |  |  | 3.54 | Expt2 |
| LGVPDYIPSQDILLAR              | 1 | 89001109                                                                                                                | N-Term(iTRAQ4plex)                                                                   | 2042.14519 |  |  | 3.54 | Expt2 |
| GIEGAOASPLVPGAGEIINTDNIK      | 1 | 60218877                                                                                                                | N-Term(iTRAQ4plex), K25(iTRAQ4plex)                                                  | 2765.53122 |  |  | 3.53 | Expt2 |
| GTLLEEGPGTSQR                 | 1 | 239787900                                                                                                               | N-Term(iTRAQ4plex)                                                                   | 1571.88725 |  |  | 3.53 | Expt2 |
| SLYDIEAGETTLPGDAIHTMIENLOPETK | 1 | 111074529                                                                                                               | N-Term(iTRAQ4plex), K30(iTRAQ4plex)                                                  | 3589.79238 |  |  | 3.52 | Expt2 |
| ADFPAGIPECGTDLAR              | 1 | 255069795                                                                                                               | N-Term(iTRAQ4plex), C10(Methylthio)                                                  | 1822.86125 |  |  | 3.52 | Expt2 |
| NIVAVGAGFCOGLR                | 2 | 257467604                                                                                                               | N-Term(iTRAQ4plex), C10(Methylthio)                                                  | 1581.80449 |  |  | 3.51 | Expt2 |
| CCAENPPACYGTVLAEFOPLVEEPK     | 1 | 163310765                                                                                                               | N-Term(iTRAQ4plex), C1(Methylthio), C2(Methylthio), C10(Methylthio), K26(iTRAQ4plex) | 3205.45009 |  |  | 3.51 | Expt2 |
| GLGFTMATEEAHR                 | 1 | 239052674                                                                                                               | N-Term(iTRAQ4plex)                                                                   | 1652.88481 |  |  | 3.50 | Expt2 |
| GYNQIIFIPAGATSIR              | 1 | 158711721                                                                                                               | N-Term(iTRAQ4plex)                                                                   | 1865.04228 |  |  | 3.50 | Expt2 |
| LVALLDTLDR                    | 2 | 254587947                                                                                                               | N-Term(iTRAQ4plex)                                                                   | 1272.76628 |  |  | 3.50 | Expt2 |
| YSYMEVIMPEK                   | 1 | 164518893                                                                                                               | N-Term(iTRAQ4plex), K11(iTRAQ4plex)                                                  | 1677.85343 |  |  | 3.49 | Expt2 |
| SILDEELQR                     | 1 | 256000745;256418964;254675117;254675195;254675201;254675251;254675253;254675259;254675119;254675244;254675265;254675115 | N-Term(iTRAQ4plex)                                                                   | 1246.67644 |  |  | 3.48 | Expt2 |
| EFFQDDVFPDITAVTWEPALSAK       | 1 | 148747331                                                                                                               | N-Term(iTRAQ4plex), K22(iTRAQ4plex)                                                  | 2801.39499 |  |  | 3.48 | Expt2 |
| VMTIPYQMPFASPVICAGQDR         | 1 | 6754994                                                                                                                 | N-Term(iTRAQ4plex), C17(Methylthio)                                                  | 2608.25315 |  |  | 3.48 | Expt2 |
| ETYPAYLPLYVAR                 | 1 | 6678419                                                                                                                 | N-Term(iTRAQ4plex)                                                                   | 1699.92485 |  |  | 3.47 | Expt2 |
| LYNSQTANPGERPVFHSQN           | 1 | 149252883                                                                                                               | N-Term(iTRAQ4plex), Y2(iTRAQ4plex)                                                   | 2447.23496 |  |  | 3.46 | Expt2 |
| ASEDFVDPWTVR                  | 1 | 256818802;256818806                                                                                                     | N-Term(iTRAQ4plex)                                                                   | 1565.77019 |  |  | 3.45 | Expt2 |
| EOAELEAAR                     | 1 | 256000745;256418964;254675117;254675195;254675201;254675251;254675253;254675259;254675119;254675244;254675265;254675115 | N-Term(iTRAQ4plex)                                                                   | 1160.60527 |  |  | 3.45 | Expt2 |
| VSLDEALQR                     | 2 | 256000745;256418964;254675117;254675195;254675201;254675251;254675253;254675259;254675119;254675244;254675265;254675115 | N-Term(iTRAQ4plex)                                                                   | 1174.65544 |  |  | 3.44 | Expt2 |
| IOAEVEAQLAR                   | 1 | 261823961                                                                                                               | N-Term(iTRAQ4plex)                                                                   | 1371.77410 |  |  | 3.43 | Expt2 |
| YASNAVSESMIR                  | 1 | 161016822;161016820                                                                                                     | N-Term(iTRAQ4plex)                                                                   | 1471.73369 |  |  | 3.43 | Expt2 |
| MYDSMLALPODLOAAR              | 1 | 6753440                                                                                                                 | N-Term(iTRAQ4plex)                                                                   | 1966.98941 |  |  | 3.43 | Expt2 |
| LSTLCPSAVLQR                  | 1 | 189409138                                                                                                               | N-Term(iTRAQ4plex), C5(Methylthio)                                                   | 1477.80120 |  |  | 3.42 | Expt2 |
| ILETTFFOR                     | 1 | 236466498                                                                                                               | N-Term(iTRAQ4plex)                                                                   | 1399.77239 |  |  | 3.42 | Expt2 |
| AISSYFVSTMSSSIK               | 1 | 41152517;283945572;283945575;283945579                                                                                  | N-Term(iTRAQ4plex), K15(iTRAQ4plex)                                                  | 1896.00473 |  |  | 3.42 | Expt2 |
| WIDNPTVDDR                    | 1 | 31543942                                                                                                                | N-Term(iTRAQ4plex)                                                                   | 1374.67815 |  |  | 3.42 | Expt2 |
| AAGMLSQDLDFSR                 | 1 | 255982594                                                                                                               | N-Term(iTRAQ4plex)                                                                   | 1552.82878 |  |  | 3.42 | Expt2 |
| YYAVNYPLR                     | 1 | 149252963;149269491;149269493;6680193                                                                                   | N-Term(iTRAQ4plex)                                                                   | 1302.69780 |  |  | 3.42 | Expt2 |
| ITGWGEETLPDGR                 | 1 | 270132817                                                                                                               | N-Term(iTRAQ4plex)                                                                   | 1574.79167 |  |  | 3.41 | Expt2 |
| NTSEODQPMGGWEMIR              | 1 | 188219589                                                                                                               | N-Term(iTRAQ4plex), O7(Deamidated)                                                   | 2023.91617 |  |  | 3.41 | Expt2 |
| FMATNDLMTLELK                 | 1 | 189409138                                                                                                               | N-Term(iTRAQ4plex), K13(iTRAQ4plex)                                                  | 1829.94339 |  |  | 3.41 | Expt2 |
| YIESPVLFLR                    | 1 | 269954711                                                                                                               | N-Term(iTRAQ4plex)                                                                   | 1380.80510 |  |  | 3.41 | Expt2 |
| GTMDDISOEQSSQGEESVSGSOR       | 1 | 258613892                                                                                                               | N-Term(iTRAQ4plex), M3(Oxidation)                                                    | 2660.14286 |  |  | 3.41 | Expt2 |
| DOVLDFMLGAVNNIRDVMPK          | 1 | 240120031                                                                                                               | N-Term(iTRAQ4plex), N13(Deamidated), M18(Oxidation), K20(iTRAQ4plex)                 | 2580.31821 |  |  | 3.41 | Expt2 |
| VAAALPGMESTQDR                | 1 | 13195674;254750706                                                                                                      | N-Term(iTRAQ4plex)                                                                   | 1589.80828 |  |  | 3.41 | Expt2 |
| TNLIVNYLPQNMTEELR             | 1 | 31542602                                                                                                                | N-Term(iTRAQ4plex), M12(Oxidation)                                                   | 2336.20896 |  |  | 3.40 | Expt2 |
